# Supplementary material for: Direct screening for chromatin status on DNA barcodes in yeast delineates the regulome of H3K79 methylation by Dot1
Source: eLife. 2016 Dec 6;5:e18919. doi: 10.7554/eLife.18919 (PMC5179194; doi:10.7554/eLife.18919)
Supplement: Figure 1—source data 1. — DOI: http://dx.doi.org/10.7554/eLife.18919.004 [file elife-18919-fig1-data1.xlsx]

## Sheet: Readme
Figure 1 - source data 1
Belonging to Figure 1B
Normalized H3K79me1 and H3K79me3 levels at the barcodes for each strain
10 sheets in this Excel file
UpTag_meanlog2	Log2-transformed average values of UpTag data of two screens.
DownTag_meanlog2	Log2-transformed average values of DownTag data of two screens.
UpTag_screen1	UpTag data from screen 1, not log2-transformed. Normalized to other ChIP or to input, as seen in heading.
UpTag_screen2	UpTag data from screen 2, not log2-transformed. Normalized to other ChIP or to input, as seen in heading.
DownTag_screen1	DownTag data from screen 1, not log2-transformed. Normalized to other ChIP or to input, as seen in heading.
DownTag_screen2	DownTag data from screen 2, not log2-transformed. Normalized to other ChIP or to input, as seen in heading.
raw_UpTag_screen1	Raw counts of UpTag screen 1.
raw_DownTag_screen1	Raw counts of DownTag screen 1.
raw_UpTag_screen2	Raw counts of UpTag screen 2.
raw_DownTag_screen2	Raw counts of DownTag screen 2.
Columns sheet 1-6
Row names	Unique identifiers: Plate_barcode
Plate	Which of 5 plates (5 subsets) the strain was on
ORF	Systematic name of the deleted gene
Gene	Standard name, as in SGD in February 2016
TAG	Barcode present in this strain.
K79me3_over_K79me1	H3K79me3/H3K79me1 value (after median normalization per plate of the individual IPs)
K79me1_over_H3	H3K79me1/H3 value (after median normalization per plate of the individual IPs)
K79me3_over_H3	H3K79me3/H3 value (after median normalization per plate of the individual IPs)
H3_over_input	H3/input value (after median normalization per plate of each individually)
Columns sheet 7-10
Rownames	Barcodes
All other columns	Plate_experiment combination. Data in one column came from one PCR and thus got one index.

## Sheet: UpTag_meanlog2
	Plate	ORF	Gene	TAG	K79me3_over_K79me1	K79me1_over_H3	K79me3_over_H3	H3_over_input
1_UPTAG0001	1	YOR094W	ARF3	UPTAG0001	0.626747	-0.158538	0.438766	0.190829
1_UPTAG0002	1	YKL051W	SFK1	UPTAG0002	-0.0734446	0.00338735	-0.0936959	0.0533106
1_UPTAG0003	1	YDL161W	ENT1	UPTAG0003	0.382967	-0.269747	0.097325	0.25279
1_UPTAG0004	1	YLR206W	ENT2	UPTAG0004	-0.104698	0.0445319	-0.0850797	-0.0153451
1_UPTAG0005	1	YLL038C	ENT4	UPTAG0005	0.256246	-0.00756309	0.22646	-0.0608413
1_UPTAG0006	1	YHR016C	YSC84	UPTAG0006	-0.282132	1.09688	0.625591	-0.974781
1_UPTAG0007	1	YJR125C	ENT3	UPTAG0007	0.162641	-0.300956	-0.171187	0.0365427
1_UPTAG0008	1	YNL293W	MSB3	UPTAG0008	-0.0563011	-0.166026	-0.253539	0.168964
1_UPTAG0009	1	YCL034W	LSB5	UPTAG0009	0.562482	0.696002	1.20751	-0.921406
1_UPTAG0010	1	YBR128C	ATG14	UPTAG0010	0.0113501	0.0595734	0.0456464	-0.117918
1_UPTAG0011	1	YMR159C	ATG16	UPTAG0011	0.0679371	0.0633478	0.0747461	-0.0330856
1_UPTAG0012	1	YPL100W	ATG21	UPTAG0012	0.141786	-0.287271	-0.170506	0.0673123
1_UPTAG0013	1	YCR068W	ATG15	UPTAG0013	0.226429	-0.116665	0.0810269	-0.0198203
1_UPTAG0014	1	YOL007C	CSI2	UPTAG0014	0.391618	-0.294937	0.0707805	0.167651
1_UPTAG0015	1	YER150W	SPI1	UPTAG0015	-0.291334	0.248161	-0.0755433	-0.18913
1_UPTAG0016	1	YIR039C	YPS6	UPTAG0016	-0.21718	-0.168323	-0.416036	0.0114139
1_UPTAG0017	1	YOR034C	AKR2	UPTAG0017	-0.419678	-0.0297374	-0.471181	0.123822
1_UPTAG0018	1	YHR057C	CPR2	UPTAG0018	-0.137762	-0.0147505	-0.175838	0.000412831
1_UPTAG0019	1	YLR361C	DCR2	UPTAG0019	-0.104169	-0.114565	-0.248362	0.0784719
1_UPTAG0020	1	YER039C	HVG1	UPTAG0020	-0.284832	-0.062125	-0.371789	0.0482941
1_UPTAG0021	1	YJL223C	PAU1	UPTAG0021	-0.541253	0.050902	-0.53895	-0.114406
1_UPTAG0022	1	YEL049W	PAU2	UPTAG0022	-0.115852	-0.0198745	-0.159711	0.126142
1_UPTAG0023	1	YCR104W	PAU3	UPTAG0023	-0.330861	0.0566537	-0.289845	0.0175759
1_UPTAG0024	1	YLR461W	PAU4	UPTAG0024	-0.0481797	-0.085146	-0.152024	-0.0305469
1_UPTAG0025	1	YFL020C	PAU5	UPTAG0025	-0.147611	-0.137763	-0.300828	-0.0655773
1_UPTAG0026	1	YNR076W	PAU6	UPTAG0026	-0.119016	-0.177692	-0.332481	0.0236684
1_UPTAG0027	1	YKR098C	UBP11	UPTAG0027	-0.123109	1.24187	1.09691	-1.72671
1_UPTAG0028	1	YDL206W	YDL206W	UPTAG0028	0.171306	-0.309256	-0.160517	0.138705
1_UPTAG0029	1	YFL040W	YFL040W	UPTAG0029	-0.117987	0.108656	-0.0344206	0.0497315
1_UPTAG0030	1	YFR018C	YFR018C	UPTAG0030	-0.000965866	-0.121928	-0.15458	0.17148
1_UPTAG0031	1	YGL081W	YGL081W	UPTAG0031	-0.333923	0.253182	-0.107663	-0.103407
1_UPTAG0032	1	YLR057W	MNL2	UPTAG0032	0.0214559	-0.0115649	-0.0180379	0.16488
1_UPTAG0033	1	YNR071C	YNR071C	UPTAG0033	0.143121	-0.177956	-0.0544863	0.0768767
1_UPTAG0034	1	YPR084W	YPR084W	UPTAG0034	-0.506486	0.26583	-0.264726	0.0597362
1_UPTAG0035	1	YGL259W	YPS5	UPTAG0035	0.276972	-0.0970822	0.153796	-0.027762
1_UPTAG0036	1	YMR237W	BCH1	UPTAG0036	-0.0157883	-0.0101173	-0.0511577	0.116652
1_UPTAG0037	1	YGL083W	SCY1	UPTAG0037	-0.0462763	0.12455	0.0536274	-0.0141265
1_UPTAG0038	1	YMR071C	TVP18	UPTAG0038	-0.0955654	-0.114629	-0.239084	0.0095835
1_UPTAG0039	1	YBL010C	YBL010C	UPTAG0039	-0.00585447	-0.0469101	-0.0832095	0.163504
1_UPTAG0040	1	YEL048C	TCA17	UPTAG0040	0.37419	-0.252204	0.0971115	0.0418147
1_UPTAG0041	1	YHL017W	YHL017W	UPTAG0041	0.38281	-0.271379	0.0829564	0.107066
1_UPTAG0042	1	YJL207C	LAA1	UPTAG0042	0.176642	0.0979675	0.250594	-0.0705846
1_UPTAG0045	1	YDR100W	TVP15	UPTAG0045	0.491321	-0.198148	0.262518	0.0323914
1_UPTAG0046	1	YER101C	AST2	UPTAG0046	-0.0899889	-0.0799919	-0.200668	0.187689
1_UPTAG0047	1	YDR371W	CTS2	UPTAG0047	0.0663849	0.0655889	0.0984375	0.132099
1_UPTAG0048	1	YDR084C	TVP23	UPTAG0048	0.371372	-0.0607229	0.278017	-0.0550767
1_UPTAG0049	1	YKR088C	TVP38	UPTAG0049	-0.0700463	-0.00900533	-0.107973	0.114896
1_UPTAG0050	1	YEL005C	VAB2	UPTAG0050	0.0935093	-0.189075	-0.154299	0.233327
1_UPTAG0051	1	YBL104C	SEA4	UPTAG0051	0.0628888	-0.148416	-0.112809	0.198476
1_UPTAG0052	1	YIR035C	YIR035C	UPTAG0052	0.0428142	-0.0758455	-0.0636539	-0.0381198
1_UPTAG0054	1	YCR082W	AHC2	UPTAG0054	-0.0663242	-0.0767615	-0.167541	-0.0105862
1_UPTAG0055	1	YDR304C	CPR5	UPTAG0055	-0.227074	-0.0717026	-0.341823	0.28498
1_UPTAG0056	1	YML101C	CUE4	UPTAG0056	-0.192598	-0.103997	-0.32024	0.124122
1_UPTAG0057	1	YGR223C	HSV2	UPTAG0057	0.197599	-0.0152123	0.157958	0.180768
1_UPTAG0058	1	YLR351C	NIT3	UPTAG0058	-0.13002	0.0683407	-0.0810075	0.0659794
1_UPTAG0059	1	YJL123C	MTC1	UPTAG0059	0.120148	-0.033553	0.0631126	0.0805317
1_UPTAG0060	1	YJR015W	YJR015W	UPTAG0060	0.363149	1.05703	1.39832	-1.61237
1_UPTAG0061	1	YPL105C	SYH1	UPTAG0061	-0.0691328	-0.0122649	-0.100792	0.226048
1_UPTAG0062	1	YDR349C	YPS7	UPTAG0062	0.15564	-0.223125	-0.0892028	-0.096674
1_UPTAG0063	1	YDR411C	DFM1	UPTAG0063	0.444043	0.695218	1.1174	-1.1187
1_UPTAG0064	1	YFR041C	ERJ5	UPTAG0064	0.147505	-0.137454	-0.0162261	0.123606
1_UPTAG0065	1	YJR118C	ILM1	UPTAG0065	0.35636	-0.203877	0.122398	0.228618
1_UPTAG0067	1	YNL156C	NSG2	UPTAG0067	-0.0807702	-0.127542	-0.233701	0.0300212
1_UPTAG0068	1	YMR123W	PKR1	UPTAG0068	0.636108	0.013402	0.619871	-0.202115
1_UPTAG0069	1	YDL204W	RTN2	UPTAG0069	-0.00328511	-0.0480763	-0.0740151	-0.113485
1_UPTAG0070	1	YHR181W	SVP26	UPTAG0070	-0.175047	0.10936	-0.0902328	-0.0586222
1_UPTAG0071	1	YBR273C	UBX7	UPTAG0071	-0.264653	-0.152256	-0.45136	0.0881423
1_UPTAG0072	1	YBR096W	YBR096W	UPTAG0072	0.553639	0.893417	1.4252	-1.58198
1_UPTAG0075	1	YDR221W	GTB1	UPTAG0075	0.656212	-0.360319	0.274108	0.18429
1_UPTAG0077	1	YDR476C	YDR476C	UPTAG0077	-0.367932	-0.0897121	-0.493293	0.0966195
1_UPTAG0078	1	YEL001C	IRC22	UPTAG0078	0.13802	-0.245189	-0.130097	0.163744
1_UPTAG0079	1	YEL043W	YEL043W	UPTAG0079	-0.285047	-0.190443	-0.498455	0.291355
1_UPTAG0080	1	YER053C-A	YER053C-A	UPTAG0080	0.063922	0.0191063	0.058299	-0.221431
1_UPTAG0081	1	YKL065C	YET1	UPTAG0081	-0.080289	-0.0715255	-0.176986	0.0763557
1_UPTAG0083	1	YGL010W	MPO1	UPTAG0083	-0.00157703	0.0566925	0.0309825	-0.0380351
1_UPTAG0084	1	YGL231C	EMC4	UPTAG0084	0.321944	0.163704	0.431125	-0.117877
1_UPTAG0085	1	YGR263C	SAY1	UPTAG0085	-0.200121	-0.149622	-0.382102	0.025135
1_UPTAG0086	1	YHR045W	YHR045W	UPTAG0086	0.272214	0.283617	0.521827	-0.104095
1_UPTAG0087	1	YIL039W	TED1	UPTAG0087	0.221104	-0.0235943	0.171995	-0.127121
1_UPTAG0088	1	YJR088C	EMC2	UPTAG0088	0.00270286	0.0824236	0.067633	-0.222829
1_UPTAG0089	1	YLL014W	EMC6	UPTAG0089	0.12458	-0.0621492	0.0249815	0.0220355
1_UPTAG0090	1	YLL023C	POM33	UPTAG0090	-0.241184	0.00311109	-0.263645	0.221287
1_UPTAG0091	1	YLR050C	YLR050C	UPTAG0091	0.304875	-0.271189	0.0102531	0.169332
1_UPTAG0092	1	YLR064W	PER33	UPTAG0092	0.148483	-0.346831	-0.222604	0.370091
1_UPTAG0093	1	YNL046W	YNL046W	UPTAG0093	0.316769	-0.0495699	0.242242	0.153554
1_UPTAG0094	1	YNL146W	YNL146W	UPTAG0094	-0.0807155	0.118656	0.0136079	0.0847238
1_UPTAG0095	1	YNR021W	YNR021W	UPTAG0095	-0.0440274	0.400748	0.332004	-0.101991
1_UPTAG0096	1	YOR044W	IRC23	UPTAG0096	0.124632	0.0874136	0.135077	-0.0366356
1_UPTAG0098	1	YPL207W	TYW1	UPTAG0098	-0.213717	0.0989035	-0.141964	-0.0224046
1_UPTAG0099	1	YPR003C	YPR003C	UPTAG0099	-0.179926	0.260157	0.0608667	0.0241345
1_UPTAG0100	1	YPR063C	YPR063C	UPTAG0100	-0.0372771	0.21508	0.15318	-0.0685471
1_UPTAG0101	1	YPR091C	NVJ2	UPTAG0101	-0.0320707	-0.0438468	-0.101358	0.0381697
1_UPTAG0102	1	YPR114W	YPR114W	UPTAG0102	-0.317189	0.180291	-0.151415	-0.0460642
1_UPTAG0103	1	YBR287W	YBR287W	UPTAG0103	-0.478368	-0.0699119	-0.591573	0.0714923
1_UPTAG0104	1	YDR519W	FPR2	UPTAG0104	0.059478	-0.00866081	0.0215564	-0.145334
1_UPTAG0105	1	YDR056C	EMC10	UPTAG0105	0.23616	0.0737397	0.279931	0.0972987
1_UPTAG0106	1	YGL079W	KXD1	UPTAG0106	-0.0367065	-0.132075	-0.195	0.106113
1_UPTAG0107	1	YGR206W	MVB12	UPTAG0107	-0.0550635	-0.0360696	-0.106547	-0.0187691
1_UPTAG0108	1	YKL061W	BLI1	UPTAG0108	0.435996	0.0673957	0.456529	0.0194623
1_UPTAG0109	1	YLR073C	RFU1	UPTAG0109	-0.109888	-0.0434156	-0.179257	-0.0175861
1_UPTAG0110	1	YLR408C	BLS1	UPTAG0110	0.301947	-0.234672	0.0415035	-0.277156
1_UPTAG0111	1	YMR171C	EAR1	UPTAG0111	-0.0761432	-0.0013236	-0.114725	0.132718
1_UPTAG0112	1	YNL086W	SNN1	UPTAG0112	-0.16088	-0.0879091	-0.27013	0.0763305
1_UPTAG0113	1	YHR105W	YPT35	UPTAG0113	-0.206027	0.217531	-0.0138025	-0.112394
1_UPTAG0115	1	YKL063C	YKL063C	UPTAG0115	-0.209793	0.0790982	-0.167794	0.00126778
1_UPTAG0116	1	YPL246C	RBD2	UPTAG0116	-0.073282	-0.0849512	-0.182965	0.0645418
1_UPTAG0117	1	YJR134C	SGM1	UPTAG0117	-0.083891	-0.0153087	-0.119486	0.0689445
1_UPTAG0118	1	YER113C	TMN3	UPTAG0118	0.0053738	-0.141149	-0.160801	0.0130452
1_UPTAG0119	1	YOL107W	YOL107W	UPTAG0119	0.235016	-0.030439	0.178074	-0.170241
1_UPTAG0121	1	YOR311C	DGK1	UPTAG0121	0.0826859	0.00210671	0.0572458	0.0231832
1_UPTAG0122	1	YDR275W	BSC2	UPTAG0122	0.156138	0.14263	0.270953	-0.174765
1_UPTAG0123	1	YCR069W	CPR4	UPTAG0123	0.0868717	-0.0729887	-0.0185222	0.0269098
1_UPTAG0124	1	YDR107C	TMN2	UPTAG0124	-0.0756086	0.0448301	-0.0542775	0.0194423
1_UPTAG0125	1	YER170W	ADK2	UPTAG0125	0.0363378	-0.0660184	-0.0654663	0.208956
1_UPTAG0126	1	YKR027W	BCH2	UPTAG0126	0.147095	-0.190124	-0.0714258	0.177662
1_UPTAG0127	1	YDR033W	MRH1	UPTAG0127	-0.245243	0.0994738	-0.162909	0.150907
1_UPTAG0128	1	YER049W	TPA1	UPTAG0128	-0.448882	-0.00794585	-0.481412	0.215471
1_UPTAG0129	1	YLR151C	PCD1	UPTAG0129	-0.169841	0.118373	-0.0845537	0.00166218
1_UPTAG0130	1	YMR204C	INP1	UPTAG0130	-0.229517	0.038035	-0.247523	-0.0327173
1_UPTAG0131	1	YOL019W	YOL019W	UPTAG0131	-0.110298	0.0580214	-0.072899	0.0815425
1_UPTAG0132	1	YKR007W	MEH1	UPTAG0132	0.618568	-0.186552	0.411469	0.472001
1_UPTAG0133	1	YDR119W	VBA4	UPTAG0133	0.0548193	-0.0327763	-0.00829435	0.0176163
1_UPTAG0134	1	YDR352W	YPQ2	UPTAG0134	0.18321	-0.145339	0.0240185	0.0360634
1_UPTAG0135	1	YNR028W	CPR8	UPTAG0135	-0.240829	-0.0862238	-0.349322	0.160381
1_UPTAG0137	1	YDL010W	GRX6	UPTAG0137	-0.0181149	-0.133268	-0.183425	0.0957018
1_UPTAG0138	1	YHL008C	YHL008C	UPTAG0138	-0.0303767	0.17763	0.127531	-0.00539137
1_UPTAG0139	1	YBR014C	GRX7	UPTAG0139	-0.161403	0.0170967	-0.164953	-0.0584256
1_UPTAG0140	1	YER014C-A	BUD25	UPTAG0140	1.58016	-0.323223	1.21987	0.277392
1_UPTAG0141	1	YOR299W	BUD7	UPTAG0141	0.195524	0.00155621	0.17711	-0.030033
1_UPTAG0143	1	YDR006C	SOK1	UPTAG0143	-0.289735	-0.0561637	-0.375652	0.14975
1_UPTAG0144	1	YNL323W	LEM3	UPTAG0144	0.322381	0.0742328	0.379311	-0.261622
1_UPTAG0146	1	YBL101C	ECM21	UPTAG0146	-0.00883298	-0.0215203	-0.054498	-0.137588
1_UPTAG0147	1	YOR092W	ECM3	UPTAG0147	0.0327111	-0.154291	-0.145764	0.214893
1_UPTAG0148	1	YER083C	GET2	UPTAG0148	0.0672118	0.0337299	0.0560849	-0.251995
1_UPTAG0149	1	YIL002C	INP51	UPTAG0149	-0.0360976	0.0474056	-0.0129351	-0.0179661
1_UPTAG0151	1	YOR109W	INP53	UPTAG0151	0.268824	0.0588177	0.319908	-0.0150346
1_UPTAG0153	1	YMR140W	SIP5	UPTAG0153	-0.407965	0.0166849	-0.41079	0.100916
1_UPTAG0154	1	YJR060W	CBF1	UPTAG0154	0.4626	-0.12033	0.318229	0.00595729
1_UPTAG0155	1	YER120W	SCS2	UPTAG0155	0.45152	-0.196911	0.23363	0.178135
1_UPTAG0156	1	YGL053W	PRM8	UPTAG0156	0.169957	-0.127768	0.0214156	0.169086
1_UPTAG0157	1	YBR283C	SSH1	UPTAG0157	-0.0908925	0.0246716	-0.0867077	0.0400478
1_UPTAG0158	1	YER019C-A	SBH2	UPTAG0158	0.127479	-0.0953124	0.0244771	-0.082988
1_UPTAG0162	1	YHR161C	YAP1801	UPTAG0162	-0.0786509	-0.0347714	-0.141868	0.0667646
1_UPTAG0163	1	YGR241C	YAP1802	UPTAG0163	-0.267058	0.351368	0.0779744	-0.048079
1_UPTAG0165	1	YNR075W	COS10	UPTAG0165	0.0953124	-0.255267	-0.187507	0.00624035
1_UPTAG0166	1	YNL227C	JJJ1	UPTAG0166	0.336675	-0.182957	0.121533	0.144025
1_UPTAG0167	1	YPL032C	SVL3	UPTAG0167	-0.0332341	0.0777658	0.0185836	-0.146801
1_UPTAG0168	1	YDL231C	BRE4	UPTAG0168	-0.245943	0.0803334	-0.190203	-0.103873
1_UPTAG0171	1	YDR388W	RVS167	UPTAG0171	0.0627108	0.480118	0.539785	0.0847311
1_UPTAG0172	1	YCR009C	RVS161	UPTAG0172	0.0656479	0.129551	0.167005	-0.00653635
1_UPTAG0173	1	YCR053W	THR4	UPTAG0173	-0.0370903	0.235641	0.169133	-0.156849
1_UPTAG0174	1	YDR264C	AKR1	UPTAG0174	1.82311	-0.870458	0.923024	0.229697
1_UPTAG0175	1	YDR036C	EHD3	UPTAG0175	-0.128599	0.0486561	-0.104185	0.0468652
1_UPTAG0176	1	YDR069C	DOA4	UPTAG0176	-0.14063	0.255536	0.0880682	-0.0488901
1_UPTAG0178	1	YAL030W	SNC1	UPTAG0178	-0.31209	0.0783183	-0.255633	-0.020645
1_UPTAG0179	1	YOR327C	SNC2	UPTAG0179	-0.526098	0.0984414	-0.458807	-0.0310889
1_UPTAG0180	1	YBR207W	FTH1	UPTAG0180	-0.277152	0.055457	-0.242173	-0.018767
1_UPTAG0181	1	YIL090W	ICE2	UPTAG0181	0.178619	-0.0691037	0.0860309	-0.0663695
1_UPTAG0182	1	YDR320C	SWA2	UPTAG0182	0.350434	-0.125514	0.194588	0.332668
1_UPTAG0183	1	YNL049C	SFB2	UPTAG0183	-0.123308	0.0379302	-0.124053	0.0697334
1_UPTAG0184	1	YAL007C	ERP2	UPTAG0184	0.0158993	0.0965624	0.0874985	-0.141351
1_UPTAG0185	1	YML012W	ERV25	UPTAG0185	-0.427273	0.0482965	-0.40403	0.092383
1_UPTAG0186	1	YGR284C	ERV29	UPTAG0186	0.221065	-0.214456	-0.0171512	-0.107326
1_UPTAG0187	1	YNL044W	YIP3	UPTAG0187	-0.186197	0.000261863	-0.210038	-0.00624985
1_UPTAG0188	1	YCR067C	SED4	UPTAG0188	0.120151	-0.0468444	0.0485724	-0.0918176
1_UPTAG0189	1	YOR307C	SLY41	UPTAG0189	1.38566	-0.594468	0.765411	-0.347545
1_UPTAG0190	1	YDR057W	YOS9	UPTAG0190	-0.220184	0.139859	-0.104983	-0.0303185
1_UPTAG0191	1	YHR098C	SFB3	UPTAG0191	0.994469	-0.107534	0.860085	0.239168
1_UPTAG0192	1	YJL192C	SOP4	UPTAG0192	0.427141	0.0558478	0.457178	-0.216789
1_UPTAG0193	1	YOR216C	RUD3	UPTAG0193	-0.02478	0.207864	0.172491	-0.144867
1_UPTAG0194	1	YFL048C	EMP47	UPTAG0194	-0.161623	0.0838471	-0.106288	0.0881622
1_UPTAG0195	1	YLR080W	EMP46	UPTAG0195	-0.113531	0.329519	0.178241	-0.185524
1_UPTAG0196	1	YML067C	ERV41	UPTAG0196	-0.119936	0.0688493	-0.0835954	0.0676999
1_UPTAG0197	1	YAL042W	ERV46	UPTAG0197	0.249126	0.238297	0.467362	-0.0713118
1_UPTAG0198	1	YAR002C-A	ERP1	UPTAG0198	0.0957804	0.0335987	0.104245	0.0223948
1_UPTAG0199	1	YGR166W	TRS65	UPTAG0199	-0.0279073	0.0358276	-0.0165958	0.0757612
1_UPTAG0200	1	YOR115C	TRS33	UPTAG0200	-0.199699	0.166772	-0.0588324	-0.0343329
1_UPTAG0201	1	YIL044C	AGE2	UPTAG0201	-0.040426	-0.162056	-0.217908	0.08182
1_UPTAG0202	1	YIL076W	SEC28	UPTAG0202	-0.324003	-0.232083	-0.584022	0.359026
1_UPTAG0203	1	YCL001W	RER1	UPTAG0203	-0.115801	0.0649689	-0.0754145	-0.111355
1_UPTAG0204	1	YDR524C	AGE1	UPTAG0204	0.91484	-0.443724	0.40175	-0.00385339
1_UPTAG0205	1	YDL226C	GCS1	UPTAG0205	1.63281	-0.501875	1.10908	0.0928204
1_UPTAG0206	1	YDL192W	ARF1	UPTAG0206	0.475965	-0.0538008	0.388334	0.117434
1_UPTAG0207	1	YDL137W	ARF2	UPTAG0207	-0.15994	-0.0776547	-0.248254	0.0358454
1_UPTAG0208	1	YHR142W	CHS7	UPTAG0208	-0.0649261	0.0927134	0.00831492	-0.00688337
1_UPTAG0209	1	YGL054C	ERV14	UPTAG0209	0.248955	-0.186492	0.0281585	-0.328134
1_UPTAG0210	1	YGL200C	EMP24	UPTAG0210	-0.187927	-0.0846589	-0.305968	0.00236094
1_UPTAG0211	1	YLR268W	SEC22	UPTAG0211	-0.162838	0.415319	0.222187	-0.0196765
1_UPTAG0212	1	YER122C	GLO3	UPTAG0212	0.164683	0.0528743	0.18612	-0.146636
1_UPTAG0213	1	YMR292W	GOT1	UPTAG0213	-0.19455	0.196406	-0.0227713	0.106939
1_UPTAG0214	1	YJR031C	GEA1	UPTAG0214	-0.0236269	-0.00195767	-0.0412975	-0.0402718
1_UPTAG0216	1	YDR108W	TRS85	UPTAG0216	-0.151625	0.210637	0.0301636	-0.0983011
1_UPTAG0217	1	YLR207W	HRD3	UPTAG0217	-0.165739	0.212274	0.0278105	0.00768829
1_UPTAG0218	1	YHR204W	MNL1	UPTAG0218	-0.26599	0.113734	-0.183016	-0.141616
1_UPTAG0219	1	YBR201W	DER1	UPTAG0219	-0.54736	0.0787368	-0.507307	0.137831
1_UPTAG0222	1	YNL064C	YDJ1	UPTAG0222	0.649986	-0.326453	0.306173	0.108081
1_UPTAG0223	1	YFL025C	BST1	UPTAG0223	0.0782487	0.218455	0.268416	-0.128245
1_UPTAG0224	1	YMR264W	CUE1	UPTAG0224	-0.00922349	0.0749878	0.0571753	0.155573
1_UPTAG0225	1	YKL079W	SMY1	UPTAG0225	-0.380528	0.0543814	-0.352256	-0.00444537
1_UPTAG0226	1	YOL065C	INP54	UPTAG0226	-0.0518723	-0.169408	-0.244535	0.105868
1_UPTAG0227	1	YDR122W	KIN1	UPTAG0227	-0.0159182	-0.192522	-0.235888	0.0607933
1_UPTAG0228	1	YLR096W	KIN2	UPTAG0228	-0.182134	0.0430293	-0.179205	-0.0454904
1_UPTAG0229	1	YPR032W	SRO7	UPTAG0229	0.211514	0.130151	0.308182	-0.0993237
1_UPTAG0230	1	YBL106C	SRO77	UPTAG0230	-0.205952	0.186463	-0.0611669	-0.0906379
1_UPTAG0231	1	YOR049C	RSB1	UPTAG0231	0.614248	0.43559	0.955768	-0.00353844
1_UPTAG0232	1	YPL147W	PXA1	UPTAG0232	0.0389194	-0.0780473	-0.0608821	0.00556254
1_UPTAG0233	1	YKL188C	PXA2	UPTAG0233	0.00695035	0.0305145	0.00846816	0.0106154
1_UPTAG0234	1	YBR264C	YPT10	UPTAG0234	-0.428912	0.183479	-0.271616	-0.131089
1_UPTAG0235	1	YDR153C	ENT5	UPTAG0235	0.0264209	0.19843	0.197866	0.0392789
1_UPTAG0236	1	YBL102W	SFT2	UPTAG0236	-0.156435	0.0630721	-0.121144	-0.0315533
1_UPTAG0237	1	YJL004C	SYS1	UPTAG0237	0.304958	-0.0167952	0.262426	-0.0379911
1_UPTAG0238	1	YJL099W	CHS6	UPTAG0238	-0.474443	-0.0594861	-0.558853	-0.0107708
1_UPTAG0239	1	YPL195W	APL5	UPTAG0239	0.142682	-0.0944602	0.0235475	-0.0801202
1_UPTAG0240	1	YGR261C	APL6	UPTAG0240	0.0854428	-0.180121	-0.127025	-0.0273219
1_UPTAG0241	1	YBR288C	APM3	UPTAG0241	0.467473	-0.182354	0.261304	-0.0537446
1_UPTAG0242	1	YJL024C	APS3	UPTAG0242	0.167426	0.423627	0.549865	-0.262928
1_UPTAG0243	1	YJL222W	VTH2	UPTAG0243	-0.36064	0.084658	-0.301995	-0.0573031
1_UPTAG0245	1	YOR036W	PEP12	UPTAG0245	-0.345926	0.908031	0.392955	-0.517074
1_UPTAG0246	1	YDR358W	GGA1	UPTAG0246	-0.350295	-0.00169195	-0.374672	0.156165
1_UPTAG0247	1	YHR108W	GGA2	UPTAG0247	0.00248707	0.198104	0.17579	0.0301697
1_UPTAG0248	1	YJL029C	VPS53	UPTAG0248	0.358455	0.0190715	0.337875	0.28189
1_UPTAG0249	1	YDR484W	VPS52	UPTAG0249	-0.485075	-0.0144458	-0.522996	-0.0611254
1_UPTAG0250	1	YDR027C	VPS54	UPTAG0250	-0.212657	0.35011	0.0980373	0.234158
1_UPTAG0251	1	YKL179C	COY1	UPTAG0251	0.400339	-0.269756	0.067864	0.210969
1_UPTAG0252	1	YOL062C	APM4	UPTAG0252	-0.270689	0.235631	-0.0603985	-0.130657
1_UPTAG0253	1	YJL044C	GYP6	UPTAG0253	-0.189425	-0.106462	-0.325441	0.251084
1_UPTAG0254	1	YDR137W	RGP1	UPTAG0254	0.292142	0.127911	0.368963	0.0792507
1_UPTAG0255	1	YER166W	DNF1	UPTAG0255	-0.129477	-0.00126761	-0.160746	-0.0718028
1_UPTAG0256	1	YLR039C	RIC1	UPTAG0256	-0.0865228	-0.276829	-0.391612	0.312878
1_UPTAG0257	1	YDR093W	DNF2	UPTAG0257	-0.203256	0.0220339	-0.208964	-0.0864666
1_UPTAG0258	1	YPL051W	ARL3	UPTAG0258	-0.285431	0.29019	-0.0341667	-0.0586422
1_UPTAG0259	1	YMR162C	DNF3	UPTAG0259	-0.704874	-0.051073	-0.771978	0.0789802
1_UPTAG0260	1	YGR142W	BTN2	UPTAG0260	-0.375427	-0.0403104	-0.443548	-0.0836425
1_UPTAG0261	1	YLR262C	YPT6	UPTAG0261	0.494203	-0.251667	0.226919	0.0930546
1_UPTAG0262	1	YJL059W	YHC3	UPTAG0262	0.260521	-0.155949	0.0795981	-0.0824984
1_UPTAG0263	1	YNL051W	COG5	UPTAG0263	-0.140067	0.179493	0.00877416	-0.128223
1_UPTAG0264	1	YNL041C	COG6	UPTAG0264	0.110136	-0.0748482	-0.00301661	-0.109952
1_UPTAG0265	1	YML071C	COG8	UPTAG0265	-0.308114	-0.0242073	-0.366014	0.171892
1_UPTAG0266	1	YGL005C	COG7	UPTAG0266	0.00242219	0.610309	0.498947	-0.20177
1_UPTAG0268	1	YOR275C	RIM20	UPTAG0268	-0.410812	-0.0682863	-0.500928	0.294432
1_UPTAG0269	1	YOL116W	MSN1	UPTAG0269	-0.261148	0.207537	-0.078339	-0.199273
1_UPTAG0271	1	YJR044C	VPS55	UPTAG0271	-0.126889	-0.119662	-0.271051	-0.035315
1_UPTAG0272	1	YLR360W	VPS38	UPTAG0272	0.446548	-0.118657	0.288678	0.0507204
1_UPTAG0273	1	YAL002W	VPS8	UPTAG0273	-0.506122	0.275318	-0.256828	0.0683767
1_UPTAG0274	1	YLR025W	SNF7	UPTAG0274	-0.248621	0.0265321	-0.247671	0.446057
1_UPTAG0275	1	YMR077C	VPS20	UPTAG0275	-0.254031	-0.183757	-0.462399	0.569414
1_UPTAG0276	1	YKL041W	VPS24	UPTAG0276	0.121515	-0.146892	-0.0549423	0.213541
1_UPTAG0277	1	YDR486C	VPS60	UPTAG0277	-0.204053	-0.11864	-0.349815	0.362831
1_UPTAG0281	1	YDR492W	IZH1	UPTAG0281	0.243942	0.197806	0.426205	-0.0256419
1_UPTAG0282	1	YLR023C	IZH3	UPTAG0282	-0.0564268	-0.0318189	-0.108916	-0.0169566
1_UPTAG0283	1	YOL002C	IZH2	UPTAG0283	-0.457956	-0.0626864	-0.554782	0.17034
1_UPTAG0284	1	YOL101C	IZH4	UPTAG0284	0.0132705	0.061843	0.0505882	-0.0573769
1_UPTAG0285	1	YMR010W	YMR010W	UPTAG0285	-0.0239122	0.0112655	-0.0422709	0.1447
1_UPTAG0286	1	YHR195W	NVJ1	UPTAG0286	-0.325207	0.33522	-0.0155737	-0.0348208
1_UPTAG0287	1	YGL014W	PUF4	UPTAG0287	0.280822	-0.255443	-0.00814928	0.146632
1_UPTAG0288	1	YPL037C	EGD1	UPTAG0288	0.0555101	-0.153103	-0.121262	0.191214
1_UPTAG0289	1	YHR193C	EGD2	UPTAG0289	-0.0171709	0.204896	0.163804	-0.0206485
1_UPTAG0290	1	YCR020C-A	MAK31	UPTAG0290	0.139971	0.0821885	0.197624	0.0493863
1_UPTAG0291	1	YEL053C	MAK10	UPTAG0291	-0.144239	-0.125401	-0.309367	-0.129038
1_UPTAG0292	1	YPR051W	MAK3	UPTAG0292	0.0365005	0.0366879	0.0357844	0.125041
1_UPTAG0293	1	YIL016W	SNL1	UPTAG0293	0.0694361	-0.00686104	0.0245258	0.00482212
1_UPTAG0294	1	YML038C	YMD8	UPTAG0294	-0.204943	-0.0612637	-0.287788	0.0293144
1_UPTAG0295	1	YKL209C	STE6	UPTAG0295	-0.164941	0.163468	-0.0338477	-0.122933
1_UPTAG0296	1	YDR410C	STE14	UPTAG0296	-0.0459018	0.189684	0.109732	0.0318364
1_UPTAG0297	1	YIR004W	DJP1	UPTAG0297	-0.138109	-0.0526658	-0.215366	0.00327167
1_UPTAG0298	1	YNL329C	PEX6	UPTAG0298	0.16172	0.0543435	0.207838	0.16875
1_UPTAG0299	1	YOR084W	LPX1	UPTAG0299	-0.254781	0.214376	-0.0395218	-0.134581
1_UPTAG0300	1	YDR265W	PEX10	UPTAG0300	0.385209	-0.149228	0.213867	0.0316563
1_UPTAG0301	1	YMR026C	PEX12	UPTAG0301	0.135062	-0.209749	-0.10842	0.229895
1_UPTAG0302	1	YNL214W	PEX17	UPTAG0302	-0.0370405	-0.138029	-0.201439	0.14736
1_UPTAG0303	1	YJL210W	PEX2	UPTAG0303	-0.132245	0.0950301	-0.0711323	0.118137
1_UPTAG0304	1	YPL112C	PEX25	UPTAG0304	-0.311993	0.245192	-0.0796391	0.0497932
1_UPTAG0305	1	YOR193W	PEX27	UPTAG0305	0.251713	0.167549	0.362956	-0.0707152
1_UPTAG0306	1	YDR479C	PEX29	UPTAG0306	-0.555052	0.122781	-0.457508	-0.0284269
1_UPTAG0307	1	YKL197C	PEX1	UPTAG0307	0.399557	-0.109628	0.26403	0.0174497
1_UPTAG0308	1	YLR324W	PEX30	UPTAG0308	0.0962252	-0.151512	-0.0852167	-0.116239
1_UPTAG0309	1	YPR128C	ANT1	UPTAG0309	0.333751	-0.0342003	0.292608	-0.154563
1_UPTAG0310	1	YDL065C	PEX19	UPTAG0310	-0.158927	-0.0980199	-0.276704	0.00626598
1_UPTAG0311	1	YDR244W	PEX5	UPTAG0311	-0.159246	-0.00634253	-0.187893	0.0636792
1_UPTAG0312	1	YDR142C	PEX7	UPTAG0312	-0.184907	-0.0180622	-0.234964	-0.0209901
1_UPTAG0313	1	YOL147C	PEX11	UPTAG0313	0.177321	0.638128	0.752203	-0.236883
1_UPTAG0314	1	YLR191W	PEX13	UPTAG0314	0.154476	-0.0352565	0.0700428	0.0400177
1_UPTAG0315	1	YOL044W	PEX15	UPTAG0315	0.311961	-0.10918	0.176432	-0.0955021
1_UPTAG0316	1	YDR329C	PEX3	UPTAG0316	-0.0361028	0.265775	0.215713	0.0221267
1_UPTAG0317	1	YGR077C	PEX8	UPTAG0317	0.0931984	-0.178821	-0.0967119	0.169427
1_UPTAG0318	1	YGR133W	PEX4	UPTAG0318	-0.313716	0.244857	-0.0865927	-0.124583
1_UPTAG0319	1	YML121W	GTR1	UPTAG0319	0.147014	0.273631	0.397769	-0.00262432
1_UPTAG0320	1	YBR171W	SEC66	UPTAG0320	0.810509	-0.360002	0.430267	0.196175
1_UPTAG0321	1	YLR292C	SEC72	UPTAG0321	0.11127	-0.0855903	0.00178345	0.00730331
1_UPTAG0322	1	YHR013C	ARD1	UPTAG0322	-1.89735	0.572683	-1.34958	0.37941
1_UPTAG0323	1	YDL040C	NAT1	UPTAG0323	-1.97012	0.657434	-1.3236	0.391566
1_UPTAG0325	1	YNR032W	PPG1	UPTAG0325	-0.0195535	0.0460115	0.00464056	0.102874
1_UPTAG0326	1	YGR123C	PPT1	UPTAG0326	-0.221107	-0.0471938	-0.292604	0.0977043
1_UPTAG0327	1	YDR477W	SNF1	UPTAG0327	0.12468	0.0738278	0.179795	-0.349929
1_UPTAG0328	1	YDR490C	PKH1	UPTAG0328	-0.137208	0.101054	-0.0531928	0.0433397
1_UPTAG0329	1	YKL126W	YPK1	UPTAG0329	0.305266	-0.183788	0.0994714	0.371527
1_UPTAG0330	1	YHR079C	IRE1	UPTAG0330	-0.110204	0.13047	-0.00203771	-0.0434658
1_UPTAG0334	1	YNL265C	IST1	UPTAG0334	0.139384	0.0267796	0.144724	0.129991
1_UPTAG0335	1	YGR105W	VMA21	UPTAG0335	0.918681	0.266304	1.08336	-0.391925
1_UPTAG0337	1	YHR060W	VMA22	UPTAG0337	0.634615	-0.119323	0.493533	-0.254472
1_UPTAG0338	1	YKL119C	VPH2	UPTAG0338	2.41012	-0.678233	1.70428	-0.627268
1_UPTAG0340	1	YDL122W	UBP1	UPTAG0340	-0.182816	0.0525722	-0.146945	0.127617
1_UPTAG0341	1	YLR216C	CPR6	UPTAG0341	-0.0132977	1.12794	0.929508	-0.65948
1_UPTAG0342	1	YBR169C	SSE2	UPTAG0342	0.488913	-0.102399	0.36221	-0.263528
1_UPTAG0343	1	YLL024C	SSA2	UPTAG0343	-0.2081	0.247839	0.0326721	-0.144186
1_UPTAG0344	1	YDR518W	EUG1	UPTAG0344	0.453824	-0.1513	0.272189	0.014919
1_UPTAG0345	1	YOL088C	MPD2	UPTAG0345	-0.12678	0.0769526	-0.0800045	0.0360388
1_UPTAG0346	1	YML078W	CPR3	UPTAG0346	0.0784765	0.0232455	0.0807155	0.107466
1_UPTAG0347	1	YOR288C	MPD1	UPTAG0347	-0.12886	0.0321412	-0.120961	-0.0430766
1_UPTAG0349	1	YMR161W	HLJ1	UPTAG0349	-0.0736622	0.256091	0.155689	-0.108663
1_UPTAG0350	1	YJL073W	JEM1	UPTAG0350	0.00518021	0.0371464	0.00731314	0.097537
1_UPTAG0351	1	YOR357C	SNX3	UPTAG0351	-0.335129	0.277938	-0.0744409	-0.169906
1_UPTAG0352	1	YDR155C	CPR1	UPTAG0352	0.0315606	-0.181536	-0.175052	0.19643
1_UPTAG0353	1	YLR121C	YPS3	UPTAG0353	-0.23167	0.0981865	-0.157824	-0.0223591
1_UPTAG0354	1	YKL010C	UFD4	UPTAG0354	-0.0644196	0.0518831	-0.0441828	-0.0538808
1_UPTAG0355	1	YER100W	UBC6	UPTAG0355	-0.0179251	-0.0231616	-0.0780154	0.277055
1_UPTAG0356	1	YLR120C	YPS1	UPTAG0356	-0.186718	0.0778726	-0.13402	-0.0263729
1_UPTAG0357	1	YMR274C	RCE1	UPTAG0357	-0.22903	0.298485	0.047285	-0.125461
1_UPTAG0358	1	YLR250W	SSP120	UPTAG0358	0.101053	0.00846737	0.0679116	-0.0195032
1_UPTAG0359	1	YPR149W	NCE102	UPTAG0359	-0.0172457	0.146898	0.078115	-0.0105823
1_UPTAG0360	1	YBR162W-A	YSY6	UPTAG0360	-0.240041	-0.00621293	-0.276365	0.00378206
1_UPTAG0362	1	YDR425W	SNX41	UPTAG0362	-0.432403	0.106156	-0.349449	0.160684
1_UPTAG0363	1	YKL073W	LHS1	UPTAG0363	0.387171	-0.12206	0.224389	0.457892
1_UPTAG0364	1	YDR313C	PIB1	UPTAG0364	0.27802	0.00086053	0.254274	0.0279844
1_UPTAG0365	1	YIL005W	EPS1	UPTAG0365	-0.0649131	0.0398423	-0.0492472	-0.054193
1_UPTAG0366	1	YDR414C	ERD1	UPTAG0366	-0.0338693	-0.126851	-0.183889	-0.00702922
1_UPTAG0367	1	YKL002W	DID4	UPTAG0367	-0.0675822	-0.0667444	-0.171379	0.363023
1_UPTAG0368	1	YPR173C	VPS4	UPTAG0368	-0.17864	0.0566887	-0.157176	0.171169
1_UPTAG0369	1	YNR006W	VPS27	UPTAG0369	-0.159893	-0.0814521	-0.269094	0.320778
1_UPTAG0370	1	YJL053W	PEP8	UPTAG0370	1.03254	-0.015097	0.992644	0.086057
1_UPTAG0371	1	YJL154C	VPS35	UPTAG0371	-0.136498	-0.0830967	-0.260362	0.32833
1_UPTAG0372	1	YOR069W	VPS5	UPTAG0372	0.191079	0.0757035	0.21982	0.0147078
1_UPTAG0373	1	YLL040C	VPS13	UPTAG0373	-0.274758	-0.12422	-0.428778	0.282277
1_UPTAG0374	1	YBL069W	AST1	UPTAG0374	-0.141989	0.32373	0.171966	0.038761
1_UPTAG0375	1	YLR246W	ERF2	UPTAG0375	-0.156497	0.0851864	-0.0974253	0.189738
1_UPTAG0376	1	YOR297C	TIM18	UPTAG0376	0.219975	-0.0643707	0.132815	0.117384
1_UPTAG0377	1	YHR160C	PEX18	UPTAG0377	-0.420066	0.0153874	-0.42934	-0.110041
1_UPTAG0378	1	YGR239C	PEX21	UPTAG0378	-0.21215	0.283292	0.0505638	-0.326553
1_UPTAG0379	1	YGL153W	PEX14	UPTAG0379	0.0273921	-0.06063	-0.0559749	0.186468
1_UPTAG0380	1	YAL055W	PEX22	UPTAG0380	-0.0164915	0.0440408	0.00251785	0.076737
1_UPTAG0381	1	YGR141W	VPS62	UPTAG0381	-0.0515327	0.00730171	-0.0673699	-0.0689978
1_UPTAG0382	1	YJR126C	VPS70	UPTAG0382	-0.139661	0.544601	0.380338	-0.259314
1_UPTAG0383	1	YMR004W	MVP1	UPTAG0383	0.212118	-0.229406	-0.0434558	0.223255
1_UPTAG0384	1	YDR495C	VPS3	UPTAG0384	1.12893	-0.33588	0.747601	-0.397037
1_UPTAG0385	1	YPR139C	LOA1	UPTAG0385	0.673506	-0.249246	0.398496	0.261429
1_UPTAG0386	1	YOL082W	ATG19	UPTAG0386	-0.166307	0.13359	-0.0548577	-0.0482567
1_UPTAG0388	1	YML097C	VPS9	UPTAG0388	-0.297284	1.33519	0.908301	-1.03454
1_UPTAG0389	1	YOR359W	VTS1	UPTAG0389	0.0988213	-0.164759	-0.0951386	0.0348048
1_UPTAG0390	1	YHL002W	HSE1	UPTAG0390	0.0469659	0.199374	0.212443	-0.130519
1_UPTAG0392	1	YOL129W	VPS68	UPTAG0392	0.26574	0.0288603	0.269895	0.112045
1_UPTAG0395	1	YBL078C	ATG8	UPTAG0395	-0.0371941	1.35537	1.23186	-0.662596
1_UPTAG0397	1	YNR007C	ATG3	UPTAG0397	-0.157477	-0.0469584	-0.226999	-0.0617289
1_UPTAG0398	1	YLR085C	ARP6	UPTAG0398	-0.496885	0.0152366	-0.508889	0.0492893
1_UPTAG0399	1	YHR171W	ATG7	UPTAG0399	0.617382	-0.223472	0.366574	0.0436541
1_UPTAG0400	1	YDL149W	ATG9	UPTAG0400	0.133513	-0.0313545	0.0718803	-0.0477492
1_UPTAG0401	1	YKR035W-A	DID2	UPTAG0401	-0.124642	-0.0468132	-0.19768	0.289062
1_UPTAG0402	1	YKR001C	VPS1	UPTAG0402	0.307961	0.0305294	0.309486	-0.113445
1_UPTAG0403	1	YDR200C	VPS64	UPTAG0403	-0.395542	0.175609	-0.244771	-0.048178
1_UPTAG0404	1	YDR485C	VPS72	UPTAG0404	-0.269042	0.087482	-0.20592	-0.0126443
1_UPTAG0405	1	YFR021W	ATG18	UPTAG0405	0.930735	-0.27922	0.633652	-0.154786
1_UPTAG0406	1	YPL149W	ATG5	UPTAG0406	0.183236	0.026307	0.180406	-0.00314519
1_UPTAG0407	1	YGL124C	MON1	UPTAG0407	-0.237648	0.123103	-0.146672	-0.0465178
1_UPTAG0408	1	YNL297C	MON2	UPTAG0408	0.0705129	0.0561368	0.102197	-0.199747
1_UPTAG0409	1	YBR290W	BSD2	UPTAG0409	0.229488	0.0916947	0.298862	-0.259799
1_UPTAG0410	1	YLR119W	SRN2	UPTAG0410	0.0531936	-0.131573	-0.102779	0.379919
1_UPTAG0411	1	YCL008C	STP22	UPTAG0411	0.0275581	-0.155217	-0.159381	0.422097
1_UPTAG0412	1	YPL065W	VPS28	UPTAG0412	-0.43191	0.00683101	-0.456329	0.416604
1_UPTAG0413	1	YPL002C	SNF8	UPTAG0413	0.0562231	0.217028	0.251541	0.0983698
1_UPTAG0414	1	YJR102C	VPS25	UPTAG0414	0.0253818	0.380252	0.365929	0.209737
1_UPTAG0415	1	YLR417W	VPS36	UPTAG0415	0.0662343	-0.13341	-0.0892956	0.477606
1_UPTAG0416	1	YPR049C	ATG11	UPTAG0416	0.211518	-0.178325	0.0101676	-0.0752549
1_UPTAG0417	1	YPR185W	ATG13	UPTAG0417	-0.0139673	0.394472	0.320006	-0.114442
1_UPTAG0418	1	YNL242W	ATG2	UPTAG0418	0.119915	0.15667	0.241981	-0.0318068
1_UPTAG0420	1	YKR020W	VPS51	UPTAG0420	0.562666	-0.178205	0.348692	0.365255
1_UPTAG0421	1	YCL038C	ATG22	UPTAG0421	0.258294	0.325332	0.541247	-0.206014
1_UPTAG0422	1	YEL027W	VMA3	UPTAG0422	1.21743	-0.18332	0.916437	-0.590027
1_UPTAG0423	1	YKR014C	YPT52	UPTAG0423	-0.145454	0.116025	-0.0537205	0.0283029
1_UPTAG0424	1	YNL093W	YPT53	UPTAG0424	-0.330973	0.140607	-0.219837	-0.0385136
1_UPTAG0425	1	YDL113C	ATG20	UPTAG0425	0.390873	0.262844	0.646669	-0.108828
1_UPTAG0426	1	YBR217W	ATG12	UPTAG0426	0.34111	0.399281	0.69133	-0.458781
1_UPTAG0427	1	YPL120W	VPS30	UPTAG0427	0.109992	0.100896	0.162635	-0.0938237
1_UPTAG0428	1	YBR131W	CCZ1	UPTAG0428	0.0924302	0.00902692	0.0662408	-0.221233
1_UPTAG0429	1	YNL223W	ATG4	UPTAG0429	0.499947	0.1699	0.626955	-0.206399
1_UPTAG0430	1	YOR089C	VPS21	UPTAG0430	-0.245072	-0.0314802	-0.299974	0.280914
1_UPTAG0431	1	YML041C	VPS71	UPTAG0431	0.596001	0.693393	1.26754	-1.63423
1_UPTAG0432	1	YBR164C	ARL1	UPTAG0432	-0.201812	0.191407	-0.0352562	-0.200714
1_UPTAG0433	1	YPL045W	VPS16	UPTAG0433	0.471499	-0.0332942	0.413273	0.25609
1_UPTAG0434	1	YEL013W	VAC8	UPTAG0434	0.13129	-0.318506	-0.227669	0.135476
1_UPTAG0435	1	YCL057W	PRD1	UPTAG0435	-0.0932425	-0.0167118	-0.135484	0.0872052
1_UPTAG0436	1	YGR132C	PHB1	UPTAG0436	-0.0671498	-0.0788907	-0.170861	0.0762287
1_UPTAG0437	1	YGR231C	PHB2	UPTAG0437	-0.131617	-0.10626	-0.296691	0.0903024
1_UPTAG0439	1	YGR086C	PIL1	UPTAG0439	-0.0796349	0.0419783	-0.0704128	0.00855075
1_UPTAG0440	1	YDL100C	GET3	UPTAG0440	0.365834	-0.0397554	0.307785	-0.226244
1_UPTAG0441	1	YJR032W	CPR7	UPTAG0441	0.449836	0.0820166	0.474892	-0.227021
1_UPTAG0443	1	YBL075C	SSA3	UPTAG0443	-0.194407	0.25383	0.0345786	-0.137647
1_UPTAG0445	1	YDR059C	UBC5	UPTAG0445	0.201674	-0.0218207	0.16031	-0.0170818
1_UPTAG0446	1	YGR038W	ORM1	UPTAG0446	0.0506117	-0.0934396	-0.0681366	0.054092
1_UPTAG0447	1	YLR350W	ORM2	UPTAG0447	0.0227569	-0.069655	-0.0714686	-0.0628564
1_UPTAG0448	1	YCR044C	PER1	UPTAG0448	0.355607	0.0980827	0.426144	-0.0926039
1_UPTAG0449	1	YOR132W	VPS17	UPTAG0449	0.205012	-0.00538679	0.174935	-0.0271029
1_UPTAG0450	1	YHR012W	VPS29	UPTAG0450	0.112061	-0.0535033	0.0457481	0.0468783
1_UPTAG0451	1	YML048W	GSF2	UPTAG0451	0.539362	-0.262644	0.252295	-0.204072
1_UPTAG0452	1	YDL018C	ERP3	UPTAG0452	0.0837303	-0.0260683	0.0388572	-0.0366898
1_UPTAG0453	1	YOR016C	ERP4	UPTAG0453	-0.245999	0.0292697	-0.252282	0.0207883
1_UPTAG0454	1	YHR110W	ERP5	UPTAG0454	0.119565	0.0803833	0.175539	-0.139834
1_UPTAG0455	1	YPR095C	SYT1	UPTAG0455	0.265481	0.00699439	0.260053	0.0252812
1_UPTAG0456	1	YGL002W	ERP6	UPTAG0456	0.00857206	-0.0488353	-0.0670368	-0.0180007
1_UPTAG0457	1	YDR229W	IVY1	UPTAG0457	-0.263717	0.714384	0.432011	-0.446074
1_UPTAG0458	1	YJL117W	PHO86	UPTAG0458	0.60159	0.017733	0.57014	-0.262136
1_UPTAG0459	1	YGL167C	PMR1	UPTAG0459	0.620101	-0.219791	0.35772	0.0622765
1_UPTAG0460	1	YJR010C-A	SPC1	UPTAG0460	0.0937179	0.0354552	0.100996	-0.0484131
1_UPTAG0461	1	YML055W	SPC2	UPTAG0461	0.0824677	0.0950676	0.153672	-0.168874
1_UPTAG0462	1	YDL138W	RGT2	UPTAG0462	0.0218283	0.0041223	0.0016778	-0.0522398
1_UPTAG0463	1	YDL194W	SNF3	UPTAG0463	-0.191348	0.171952	-0.0381623	-0.0204707
1_UPTAG0464	1	YLR330W	CHS5	UPTAG0464	-0.104642	-0.195336	-0.322912	0.146792
1_UPTAG0465	1	YMR017W	SPO20	UPTAG0465	-0.134785	-0.148927	-0.307991	-0.0201821
1_UPTAG0466	1	YKR031C	SPO14	UPTAG0466	-0.185796	0.213919	-0.00126542	-0.240943
1_UPTAG0467	1	YNR049C	MSO1	UPTAG0467	-0.135176	-0.0652276	-0.225081	0.0785338
1_UPTAG0468	1	YPL154C	PEP4	UPTAG0468	-0.254528	0.0725318	-0.207577	-0.0679905
1_UPTAG0469	1	YEL060C	PRB1	UPTAG0469	-0.261765	0.0821112	-0.212805	-0.0719041
1_UPTAG0470	1	YOL031C	SIL1	UPTAG0470	-0.127129	-0.00320345	-0.156002	0.042266
1_UPTAG0471	1	YER087C-B	SBH1	UPTAG0471	0.219799	0.0450269	0.238029	-0.190775
1_UPTAG0472	1	YLR083C	EMP70	UPTAG0472	0.103689	-0.148168	-0.0699639	-0.0364935
1_UPTAG0473	1	YLL043W	FPS1	UPTAG0473	0.333732	-0.068966	0.237851	-0.0781182
1_UPTAG0474	1	YPL084W	BRO1	UPTAG0474	-0.75927	-0.0559488	-0.839059	0.387841
1_UPTAG0475	1	YER143W	DDI1	UPTAG0475	-0.123612	0.030546	-0.114118	-0.0388845
1_UPTAG0479	1	YPL234C	VMA11	UPTAG0479	0.433386	0.247125	0.647931	-0.351996
1_UPTAG0480	1	YPR036W	VMA13	UPTAG0480	0.443221	-0.131143	0.29202	-0.289117
1_UPTAG0481	1	YOR332W	VMA4	UPTAG0481	0.716464	-0.201109	0.472469	-0.265057
1_UPTAG0482	1	YKL080W	VMA5	UPTAG0482	0.0865426	0.327211	0.391896	-0.262822
1_UPTAG0483	1	YGR020C	VMA7	UPTAG0483	1.11829	0.131644	1.20477	-0.308529
1_UPTAG0484	1	YEL051W	VMA8	UPTAG0484	0.570982	-0.000870301	0.546633	-0.415286
1_UPTAG0485	1	YJR033C	RAV1	UPTAG0485	0.961523	-0.267381	0.669756	-0.462239
1_UPTAG0486	1	YHR039C-A	VMA10	UPTAG0486	1.3327	-0.520583	0.780773	-0.548645
1_UPTAG0487	1	YDR456W	NHX1	UPTAG0487	-0.259098	-0.192363	-0.517303	0.12248
1_UPTAG0488	1	YDR202C	RAV2	UPTAG0488	-0.219545	0.056745	-0.186354	0.113919
1_UPTAG0489	1	YDL185W	VMA1	UPTAG0489	-0.346475	-0.0565179	-0.432656	-0.0740118
1_UPTAG0490	1	YLR447C	VMA6	UPTAG0490	0.774853	-0.447859	0.302122	-0.515006
1_UPTAG0491	1	YOR270C	VPH1	UPTAG0491	0.143338	-0.0100931	0.11078	-0.270224
1_UPTAG0493	1	YMR297W	PRC1	UPTAG0493	-0.0312944	0.165778	0.108471	0.014275
1_UPTAG0494	1	YLR373C	VID22	UPTAG0494	0.534337	-0.0722508	0.435847	0.039808
1_UPTAG0495	1	YBR286W	APE3	UPTAG0495	-0.527069	-0.0688513	-0.634442	0.0400408
1_UPTAG0496	1	YKL103C	APE1	UPTAG0496	-0.110626	-0.0699142	-0.205516	-0.0839368
1_UPTAG0497	1	YPR079W	MRL1	UPTAG0497	0.22414	-0.203785	-0.0227613	0.0477045
1_UPTAG0498	1	YHR138C	YHR138C	UPTAG0498	0.112612	-0.164871	-0.0825535	0.172607
1_UPTAG0499	1	YER072W	VTC1	UPTAG0499	-0.220864	0.0285379	-0.208335	-0.24884
1_UPTAG0500	1	YPL019C	VTC3	UPTAG0500	-0.10867	-0.144439	-0.26706	0.0864754
1_UPTAG0502	1	YNL015W	PBI2	UPTAG0502	-0.17523	-0.218724	-0.417243	0.110814
1_UPTAG0504	1	YNL054W	VAC7	UPTAG0504	1.29357	-0.591758	0.679243	0.324139
1_UPTAG0505	1	YLR386W	VAC14	UPTAG0505	0.288485	-0.00592471	0.257628	-0.239713
1_UPTAG0506	1	YDL077C	VAM6	UPTAG0506	0.0434444	-0.148971	-0.128388	0.0458006
1_UPTAG0508	1	YOL018C	TLG2	UPTAG0508	-0.143425	-0.0557774	-0.221574	0.0876142
1_UPTAG0509	1	YLR093C	NYV1	UPTAG0509	0.313709	-0.194506	0.0804623	0.169343
1_UPTAG0510	1	YDR323C	PEP7	UPTAG0510	0.561487	0.125012	0.637813	-0.0920173
1_UPTAG0511	1	YMR183C	SSO2	UPTAG0511	-0.206021	-0.0501772	-0.280343	0.0873935
1_UPTAG0513	1	YPL232W	SSO1	UPTAG0513	-0.201777	0.154489	-0.0711651	-0.0637716
1_UPTAG0514	1	YOR106W	VAM3	UPTAG0514	0.173318	-0.0521948	0.0911694	0.0779003
1_UPTAG0515	1	YGL212W	VAM7	UPTAG0515	-0.0589427	-0.0170431	-0.0719665	0.00458292
1_UPTAG0516	1	YAR031W	PRM9	UPTAG0516	-0.148276	0.386515	0.215725	-0.199242
1_UPTAG0517	1	YJL178C	ATG27	UPTAG0517	-0.294896	0.0156486	-0.304562	0.071713
1_UPTAG0518	1	YKL135C	APL2	UPTAG0518	0.0550216	0.0736667	0.102678	0.0618222
1_UPTAG0519	1	YPR029C	APL4	UPTAG0519	-0.152462	-0.0635424	-0.253491	0.152618
1_UPTAG0520	1	YPL259C	APM1	UPTAG0520	-0.263707	0.0645659	-0.250464	-0.0271666
1_UPTAG0521	1	YHL019C	APM2	UPTAG0521	-0.476302	0.089422	-0.424205	-0.0258512
1_UPTAG0522	1	YLR170C	APS1	UPTAG0522	-0.0560977	0.0766986	-0.0256446	0.137323
1_UPTAG0523	1	YJR005W	APL1	UPTAG0523	-0.346643	1.32116	1.04232	-0.609227
1_UPTAG0524	1	YBL037W	APL3	UPTAG0524	-0.247733	-0.304652	-0.582156	0.0530182
1_UPTAG0525	1	YJR058C	APS2	UPTAG0525	-0.499695	0.241381	-0.278133	-0.00611647
1_UPTAG0529	1	YLR309C	IMH1	UPTAG0529	0.0659319	-4.18253e-05	0.0346337	0.00519354
1_UPTAG0530	1	YPL249C	GYP5	UPTAG0530	0.146598	0.283582	0.386027	-0.141358
1_UPTAG0531	1	YPR028W	YOP1	UPTAG0531	0.00171096	-0.0851229	-0.114162	-0.00158503
1_UPTAG0532	1	YFL027C	GYP8	UPTAG0532	-0.363385	0.0516788	-0.338358	0.0646272
1_UPTAG0533	1	YAL048C	GEM1	UPTAG0533	0.0206027	0.192958	0.204427	-0.0525452
1_UPTAG0535	1	YGL023C	PIB2	UPTAG0535	0.088688	-0.0216272	0.0432963	0.0453644
1_UPTAG0536	1	YJR110W	YMR1	UPTAG0536	0.270907	-0.221313	0.0140345	0.0708577
1_UPTAG0537	1	YPL145C	KES1	UPTAG0537	0.0164109	1.50048	1.30633	-1.10458
1_UPTAG0538	1	YCR034W	ELO2	UPTAG0538	1.32508	-0.531611	0.748833	0.633449
1_UPTAG0539	1	YBR105C	VID24	UPTAG0539	0.133377	-0.0251129	0.0740237	-0.0512969
1_UPTAG0540	1	YER031C	YPT31	UPTAG0540	0.12679	-0.0526552	0.0439078	-0.252374
1_UPTAG0541	1	YGL210W	YPT32	UPTAG0541	0.0785946	0.0322374	0.0836183	-0.118583
1_UPTAG0543	1	YKL176C	LST4	UPTAG0543	-0.24049	0.0121996	-0.266423	-0.0198874
1_UPTAG0544	1	YGR057C	LST7	UPTAG0544	0.698373	-0.382712	0.287106	0.149687
1_UPTAG0577	1	YBL015W	ACH1	UPTAG0577	-0.142021	-0.0670463	-0.233641	-0.05388
1_UPTAG0578	1	YGR268C	HUA1	UPTAG0578	-0.0416627	0.0781843	0.0126036	-0.0572698
1_UPTAG0579	1	YOR284W	HUA2	UPTAG0579	-0.187901	0.144167	-0.0793713	0.0481324
1_UPTAG0580	1	YLR144C	ACF2	UPTAG0580	-0.0441604	0.0947413	0.0153932	0.0115868
1_UPTAG0581	1	YJR083C	ACF4	UPTAG0581	0.290814	-0.211627	0.0556937	0.146401
1_UPTAG0582	1	YLR410W	VIP1	UPTAG0582	0.295825	0.0890123	0.356881	-0.346296
1_UPTAG0583	1	YPR154W	PIN3	UPTAG0583	0.107553	0.169707	0.251206	-0.0892804
1_UPTAG0584	1	YJL020C	BBC1	UPTAG0584	0.0728497	-0.0806721	-0.028878	0.0902763
1_UPTAG0586	1	YNL047C	SLM2	UPTAG0586	-0.357652	0.0843124	-0.298881	-0.0311022
1_UPTAG0587	1	YOR239W	ABP140	UPTAG0587	0.0292558	1.10152	1.00383	-1.01687
1_UPTAG0589	1	YOR035C	SHE4	UPTAG0589	1.23935	-0.548472	0.656916	0.406297
1_UPTAG0590	1	YBR059C	AKL1	UPTAG0590	0.202902	0.147498	0.320681	-0.167115
1_UPTAG0591	1	YJL100W	LSB6	UPTAG0591	-0.20728	-0.085912	-0.330344	0.112828
1_UPTAG0593	1	YFR024C-A	LSB3	UPTAG0593	-0.407424	0.17547	-0.257141	-0.058945
1_UPTAG0594	1	YOL112W	MSB4	UPTAG0594	-0.101598	0.319689	0.19343	-0.258273
1_UPTAG0596	1	YNL079C	TPM1	UPTAG0596	0.65834	0.0676044	0.713161	0.00247109
1_UPTAG0597	1	YIL138C	TPM2	UPTAG0597	0.0236865	0.534223	0.544282	-0.230661
1_UPTAG0598	1	YDR245W	MNN10	UPTAG0598	1.32764	-0.250826	1.03935	0.176571
1_UPTAG0599	1	YIL159W	BNR1	UPTAG0599	-0.189015	-0.0312645	-0.244859	-0.0186324
1_UPTAG0601	1	YER149C	PEA2	UPTAG0601	0.00869657	0.16904	0.153212	-0.133891
1_UPTAG0602	1	YNL271C	BNI1	UPTAG0602	0.87512	-0.132388	0.707676	0.118056
1_UPTAG0603	1	YLL021W	SPA2	UPTAG0603	0.248394	-0.00789903	0.210356	0.0442047
1_UPTAG0604	1	YLR313C	SPH1	UPTAG0604	-0.019254	0.359244	0.293671	-0.304309
1_UPTAG0605	1	YKR055W	RHO4	UPTAG0605	-0.35839	0.173333	-0.203845	0.0225883
1_UPTAG0606	1	YNL094W	APP1	UPTAG0606	0.12905	-0.0876116	0.00814048	-0.313767
1_UPTAG0607	1	YHR114W	BZZ1	UPTAG0607	-0.223299	0.418271	0.201477	0.00784589
1_UPTAG0608	1	YNL084C	END3	UPTAG0608	0.38601	0.0543583	0.406628	-0.0864673
1_UPTAG0609	1	YLR429W	CRN1	UPTAG0609	-0.0347941	-0.169336	-0.225147	0.0057832
1_UPTAG0610	1	YOR367W	SCP1	UPTAG0610	0.380513	-0.0560365	0.30596	-0.0411398
1_UPTAG0611	1	YDR129C	SAC6	UPTAG0611	0.758652	-0.488442	0.214697	0.480885
1_UPTAG0612	1	YDL135C	RDI1	UPTAG0612	0.141033	0.0538898	0.168147	-0.0183347
1_UPTAG0613	1	YOR127W	RGA1	UPTAG0613	0.112321	0.166778	0.249982	-0.115249
1_UPTAG0614	1	YDR379W	RGA2	UPTAG0614	-0.0859539	-0.000375216	-0.106559	-0.047592
1_UPTAG0615	1	YLR370C	ARC18	UPTAG0615	1.1439	-0.566116	0.551616	0.349806
1_UPTAG0616	1	YJR084W	YJR084W	UPTAG0616	0.175935	-0.013627	0.137664	0.0712022
1_UPTAG0617	1	YDL216C	RRI1	UPTAG0617	-0.0413487	-0.0771995	-0.137521	0.0265789
1_UPTAG0618	1	YMR025W	CSI1	UPTAG0618	0.18607	-0.127846	0.0208721	0.0723584
1_UPTAG0619	1	YDR179C	CSN9	UPTAG0619	0.0697689	-0.0661682	-0.0225815	-0.0765975
1_UPTAG0620	1	YOL117W	RRI2	UPTAG0620	0.054156	0.312009	0.343174	-0.213111
1_UPTAG0621	1	YNR044W	AGA1	UPTAG0621	0.0531867	0.200258	0.224338	-0.0902246
1_UPTAG0622	1	YGL032C	AGA2	UPTAG0622	0.217556	0.0997282	0.289118	-0.0497955
1_UPTAG0623	1	YJR004C	SAG1	UPTAG0623	-0.189329	0.27319	0.0563424	-0.00955026
1_UPTAG0625	1	YGL180W	ATG1	UPTAG0625	-0.119354	-0.0828735	-0.226905	-0.00917885
1_UPTAG0626	1	YBR210W	ERV15	UPTAG0626	-0.325543	0.198874	-0.156583	-0.142055
1_UPTAG0627	1	YKL007W	CAP1	UPTAG0627	0.450442	-0.132832	0.283797	0.138105
1_UPTAG0628	1	YIL034C	CAP2	UPTAG0628	-0.107295	0.13189	-0.0285816	0.0931589
1_UPTAG0629	1	YDL049C	KNH1	UPTAG0629	0.0762554	0.179434	0.21987	0.0307233
1_UPTAG0630	1	YMR306W	FKS3	UPTAG0630	0.10877	0.273554	0.313942	-0.281882
1_UPTAG0631	1	YMR215W	GAS3	UPTAG0631	0.038755	-0.118167	-0.103017	0.032937
1_UPTAG0632	1	YOL132W	GAS4	UPTAG0632	0.0549622	0.116976	0.140979	-0.0885667
1_UPTAG0633	1	YOL030W	GAS5	UPTAG0633	0.377176	-0.237316	0.103059	0.0644398
1_UPTAG0634	1	YLR343W	GAS2	UPTAG0634	-0.141521	1.64849	1.23648	-1.29184
1_UPTAG0635	1	YIR003W	AIM21	UPTAG0635	-0.0159476	0.0916032	0.0395066	-0.0221364
1_UPTAG0636	1	YKR100C	SKG1	UPTAG0636	0.00992434	0.476492	0.462523	0.132405
1_UPTAG0637	1	YNL087W	TCB2	UPTAG0637	0.127804	-0.124763	-0.0190017	0.117881
1_UPTAG0638	1	YMR295C	YMR295C	UPTAG0638	0.0739052	-0.238492	-0.18898	-0.0654626
1_UPTAG0639	1	YOR264W	DSE3	UPTAG0639	-0.374835	0.163567	-0.234416	0.0509799
1_UPTAG0640	1	YDR348C	PAL1	UPTAG0640	-0.100096	-0.126959	-0.259133	0.0438388
1_UPTAG0641	1	YPL158C	AIM44	UPTAG0641	0.242242	0.18623	0.361107	0.0367657
1_UPTAG0642	1	YPL221W	FLC1	UPTAG0642	-0.169268	-0.0381778	-0.255648	0.209525
1_UPTAG0643	1	YHR149C	SKG6	UPTAG0643	-0.171342	0.349472	0.147233	-0.0496213
1_UPTAG0644	1	YCR030C	SYP1	UPTAG0644	0.373828	0.0357727	0.387042	0.091062
1_UPTAG0645	1	YLR037C	PAU23	UPTAG0645	0.448624	-0.273885	0.151994	0.0399035
1_UPTAG0646	1	YBR301W	PAU24	UPTAG0646	0.56029	-0.226917	0.307871	0.1299
1_UPTAG0647	1	YJR151C	DAN4	UPTAG0647	0.490476	-0.211051	0.253593	0.0146816
1_UPTAG0648	1	YJL078C	PRY3	UPTAG0648	0.80235	-0.405328	0.371232	0.0511683
1_UPTAG0649	1	YDL037C	BSC1	UPTAG0649	0.0975074	-0.195123	-0.118112	0.15664
1_UPTAG0650	1	YNR069C	BSC5	UPTAG0650	-0.0325158	-0.171546	-0.253108	0.0262663
1_UPTAG0651	1	YLR213C	CRR1	UPTAG0651	-0.284195	-0.0225537	-0.330556	0.0675613
1_UPTAG0652	1	YBR033W	EDS1	UPTAG0652	-0.286489	-0.0728175	-0.390466	0.145205
1_UPTAG0654	1	YLR099C	ICT1	UPTAG0654	-0.125478	0.25286	0.106783	-0.00339148
1_UPTAG0656	1	YBL066C	SEF1	UPTAG0656	-0.484596	0.114208	-0.393494	0.0275256
1_UPTAG0657	1	YFR022W	ROG3	UPTAG0657	0.0102776	-0.181316	-0.202431	0.172775
1_UPTAG0658	1	YGL015C	YGL015C	UPTAG0658	-0.14771	0.122316	-0.0618627	-0.013783
1_UPTAG0659	1	YGL196W	DSD1	UPTAG0659	-0.143328	0.151865	-0.0182294	-0.0285235
1_UPTAG0660	1	YJL046W	AIM22	UPTAG0660	0.276455	-0.165316	0.0761335	0.155545
1_UPTAG0662	1	YKL037W	AIM26	UPTAG0662	-0.00278249	-0.306121	-0.343863	0.207986
1_UPTAG0663	1	YLR021W	IRC25	UPTAG0663	-0.244173	0.00841908	-0.260406	0.0797723
1_UPTAG0666	1	YOL003C	PFA4	UPTAG0666	-0.158064	-0.0733209	-0.255067	0.057433
1_UPTAG0667	1	YPL041C	MRX11	UPTAG0667	-0.413954	-0.126405	-0.560866	0.0344843
1_UPTAG0668	1	YPL077C	YPL077C	UPTAG0668	-0.274744	-0.000366877	-0.311469	0.0646766
1_UPTAG0669	1	YBR148W	YSW1	UPTAG0669	0.313191	-0.0702061	0.219185	-0.154974
1_UPTAG0670	1	YGL110C	CUE3	UPTAG0670	-0.198545	-0.0725515	-0.297968	0.00263866
1_UPTAG0671	1	YOR042W	CUE5	UPTAG0671	-0.0128125	0.422217	0.384509	-0.0252642
1_UPTAG0672	1	YAL053W	FLC2	UPTAG0672	0.0788483	0.0248537	0.0832573	0.0312812
1_UPTAG0673	1	YDR248C	YDR248C	UPTAG0673	0.0380329	-0.412608	-0.40029	0.132859
1_UPTAG0674	1	YEL020C	YEL020C	UPTAG0674	-0.0784993	-0.212414	-0.319929	-0.027094
1_UPTAG0675	1	YGR237C	YGR237C	UPTAG0675	-0.435629	0.138743	-0.318847	0.0224379
1_UPTAG0676	1	YHR033W	YHR033W	UPTAG0676	-0.0223945	0.161839	0.114089	0.042427
1_UPTAG0677	1	YML131W	YML131W	UPTAG0677	0.109096	-0.106596	-0.0238005	-0.0225492
1_UPTAG0678	1	YMR073C	IRC21	UPTAG0678	0.247178	-0.204464	0.0188712	0.227629
1_UPTAG0679	1	YMR124W	EPO1	UPTAG0679	0.296496	-0.0381363	0.231064	0.138145
1_UPTAG0680	1	YNL040W	YNL040W	UPTAG0680	-0.222629	0.12395	-0.125041	-0.0991954
1_UPTAG0681	1	YJR055W	HIT1	UPTAG0681	0.390308	-0.37125	-0.021283	0.28555
1_UPTAG0682	1	YGR136W	LSB1	UPTAG0682	-0.30609	0.107078	-0.232196	0.0972007
1_UPTAG0683	1	YBR238C	YBR238C	UPTAG0683	0.195952	-0.014144	0.156119	-0.0766032
1_UPTAG0685	1	YLR414C	PUN1	UPTAG0685	0.0306488	-0.0353806	0.0163215	0.174581
1_UPTAG0686	1	YOL070C	NBA1	UPTAG0686	0.111672	-0.150599	-0.0640537	0.0153608
1_UPTAG0687	1	YOR304C-A	BIL1	UPTAG0687	-0.165915	0.0938978	-0.0959931	-0.0575149
1_UPTAG0688	1	YJL079C	PRY1	UPTAG0688	-0.35615	0.0262706	-0.359321	-0.045731
1_UPTAG0689	1	YDR185C	UPS3	UPTAG0689	0.16798	0.168506	0.303256	-0.209984
1_UPTAG0690	1	YDR233C	RTN1	UPTAG0690	-0.134452	1.08342	0.850364	-0.830224
1_UPTAG0691	1	YBR054W	YRO2	UPTAG0691	-0.0799212	0.673584	0.571806	-1.0497
1_UPTAG0692	1	YDR314C	RAD34	UPTAG0692	-0.280397	-0.0671894	-0.387476	0.118387
1_UPTAG0693	1	YPR045C	THP3	UPTAG0693	0.0445896	-0.0230282	-0.0285381	-0.0119368
1_UPTAG0694	1	YBL028C	YBL028C	UPTAG0694	-0.233878	0.283717	0.0247487	-0.0633401
1_UPTAG0695	1	YMR195W	ICY1	UPTAG0695	0.101664	0.0111892	0.0831406	-0.204372
1_UPTAG0696	1	YKL161C	KDX1	UPTAG0696	0.0933316	-0.287357	-0.22201	0.312749
1_UPTAG0697	1	YML117W	NAB6	UPTAG0697	0.0804786	0.0362452	0.0824709	-0.069593
1_UPTAG0698	1	YIL110W	HPM1	UPTAG0698	-0.130705	-0.126128	-0.288774	0.200609
1_UPTAG0699	1	YNL063W	MTQ1	UPTAG0699	-0.014951	0.111898	0.0544397	-0.108444
1_UPTAG0700	1	YDL178W	DLD2	UPTAG0700	0.24556	-0.156196	0.0560541	-0.0299303
1_UPTAG0701	1	YGR080W	TWF1	UPTAG0701	-0.0910115	-0.172434	-0.278891	0.051624
1_UPTAG0702	1	YGR152C	RSR1	UPTAG0702	0.237442	0.187863	0.387969	0.045438
1_UPTAG0703	1	YKL092C	BUD2	UPTAG0703	0.196282	-0.136934	0.0240343	0.0956708
1_UPTAG0705	1	YEL029C	BUD16	UPTAG0705	0.177396	-0.24619	-0.119382	0.233967
1_UPTAG0706	1	YFL023W	BUD27	UPTAG0706	1.13057	-0.363691	0.735635	0.369718
1_UPTAG0707	1	YNR027W	BUD17	UPTAG0707	-0.517041	0.053754	-0.501241	-0.221093
1_UPTAG0708	1	YOR301W	RAX1	UPTAG0708	0.58458	-0.200727	0.359602	0.00532456
1_UPTAG0709	1	YLR084C	RAX2	UPTAG0709	-0.192559	0.147345	-0.0711045	0.0889482
1_UPTAG0710	1	YGL174W	BUD13	UPTAG0710	0.349042	0.177296	0.494953	-0.00702661
1_UPTAG0712	1	YMR014W	BUD22	UPTAG0712	0.499898	0.0507535	0.524097	0.117236
1_UPTAG0714	1	YJR092W	BUD4	UPTAG0714	-0.0573022	1.10778	0.920405	-0.921546
1_UPTAG0715	1	YPR122W	AXL1	UPTAG0715	-0.258372	0.1558	-0.129927	0.0137844
1_UPTAG0716	1	YIL140W	AXL2	UPTAG0716	0.212956	0.0259581	0.217396	-0.0316116
1_UPTAG0717	1	YCR063W	BUD31	UPTAG0717	0.459652	0.349243	0.7694	-0.552625
1_UPTAG0718	1	YGR221C	TOS2	UPTAG0718	-0.168141	0.0919178	-0.101318	-0.0550984
1_UPTAG0719	1	YBR267W	REI1	UPTAG0719	0.588072	-0.22844	0.3354	0.316486
1_UPTAG0720	1	YKL159C	RCN1	UPTAG0720	0.0109175	-0.0697312	-0.0867829	0.0675682
1_UPTAG0721	1	YGL248W	PDE1	UPTAG0721	0.151176	0.0789216	0.18708	-0.0852146
1_UPTAG0722	1	YOR360C	PDE2	UPTAG0722	0.0487401	-0.0336229	-0.0197	-0.145801
1_UPTAG0723	1	YNL127W	FAR11	UPTAG0723	0.138014	-0.0709406	0.0431343	0.0589254
1_UPTAG0724	1	YFR008W	FAR7	UPTAG0724	1.78614	-0.592856	1.16961	0.19035
1_UPTAG0725	1	YMR029C	FAR8	UPTAG0725	0.0339494	-0.0826717	-0.071903	0.0746038
1_UPTAG0726	1	YLR238W	FAR10	UPTAG0726	-0.649058	0.13899	-0.547431	0.0560541
1_UPTAG0727	1	YML057W	CMP2	UPTAG0727	0.076185	0.0414334	0.092472	-0.088088
1_UPTAG0728	1	YBR229C	ROT2	UPTAG0728	0.223651	-0.0486008	0.150964	-0.0198889
1_UPTAG0729	1	YKL046C	DCW1	UPTAG0729	-0.177397	0.105417	-0.098421	-0.194106
1_UPTAG0730	1	YEL004W	YEA4	UPTAG0730	-0.287682	0.0135355	-0.30562	0.077244
1_UPTAG0731	1	YBL006C	LDB7	UPTAG0731	-0.643691	0.162287	-0.506705	0.0155099
1_UPTAG0733	1	YLR020C	YEH2	UPTAG0733	-0.329872	0.437383	0.101976	-0.192902
1_UPTAG0734	1	YJR075W	HOC1	UPTAG0734	0.0515082	0.144073	0.172861	-0.195641
1_UPTAG0735	1	YMR307W	GAS1	UPTAG0735	1.00893	-0.36268	0.620866	0.399145
1_UPTAG0736	1	YGR282C	BGL2	UPTAG0736	-0.0638164	0.0213505	-0.0708562	0.0625114
1_UPTAG0737	1	YDR261C	EXG2	UPTAG0737	-0.112322	0.227412	0.0901078	-0.162597
1_UPTAG0738	1	YGL027C	CWH41	UPTAG0738	-0.044336	0.385326	0.295009	-0.138303
1_UPTAG0739	1	YER124C	DSE1	UPTAG0739	0.0664491	0.205385	0.222654	-0.0680422
1_UPTAG0740	1	YDR055W	PST1	UPTAG0740	0.0526732	0.46275	0.469561	-0.533398
1_UPTAG0741	1	YEL040W	UTR2	UPTAG0741	0.191936	-0.178578	-0.0122992	-0.00171082
1_UPTAG0742	1	YHR021W-A	ECM12	UPTAG0742	-0.0269745	-0.125652	-0.176505	-0.154312
1_UPTAG0743	1	YBL043W	ECM13	UPTAG0743	0.0353654	-0.325274	-0.319064	-0.0685315
1_UPTAG0744	1	YLR390W	ECM19	UPTAG0744	-0.134118	-0.115628	-0.273172	0.10942
1_UPTAG0745	1	YJR106W	ECM27	UPTAG0745	0.0120053	-0.0596926	-0.0695473	0.0739507
1_UPTAG0746	1	YHL043W	ECM34	UPTAG0746	-0.139965	-0.174648	-0.323902	0.171788
1_UPTAG0748	1	YJL201W	ECM25	UPTAG0748	-0.0730897	-0.0447894	-0.149581	-0.167007
1_UPTAG0750	1	YDR528W	HLR1	UPTAG0750	0.131428	-0.121796	-0.0259714	0.0677359
1_UPTAG0751	1	YHR103W	SBE22	UPTAG0751	-0.30579	-0.0174367	-0.348484	-0.0474098
1_UPTAG0752	1	YBL001C	ECM15	UPTAG0752	0.100656	0.111136	0.184623	-0.0268242
1_UPTAG0753	1	YDR351W	SBE2	UPTAG0753	-0.376911	0.145761	-0.295221	-0.00523867
1_UPTAG0754	1	YBR005W	RCR1	UPTAG0754	0.0653494	0.0105468	0.0545718	-0.0379199
1_UPTAG0755	1	YLR443W	ECM7	UPTAG0755	-0.206751	-0.0456627	-0.27472	0.0212268
1_UPTAG0756	1	YGR023W	MTL1	UPTAG0756	-0.0665795	-0.0351349	-0.149255	0.0678032
1_UPTAG0758	1	YBR078W	ECM33	UPTAG0758	0.0582649	0.0572692	0.0856537	-0.0580597
1_UPTAG0759	1	YDR446W	ECM11	UPTAG0759	0.203712	-0.225047	-0.0472479	0.259177
1_UPTAG0760	1	YHR132C	ECM14	UPTAG0760	-0.241927	0.0797838	-0.181286	-0.0281963
1_UPTAG0761	1	YDR293C	SSD1	UPTAG0761	-0.213384	-0.149896	-0.39001	0.153165
1_UPTAG0762	1	YKL096W	CWP1	UPTAG0762	0.119531	-0.0545238	0.0393111	-0.0679086
1_UPTAG0763	1	YJL159W	HSP150	UPTAG0763	-0.0257218	-0.175496	-0.222866	0.0683899
1_UPTAG0764	1	YNL322C	KRE1	UPTAG0764	-0.1314	0.644072	0.470922	-0.663565
1_UPTAG0765	1	YKL163W	PIR3	UPTAG0765	-0.136041	0.157783	-0.0133102	-0.000692561
1_UPTAG0767	1	YJL158C	CIS3	UPTAG0767	0.284586	-0.164062	0.0935433	0.0258101
1_UPTAG0768	1	YLR390W-A	CCW14	UPTAG0768	0.276246	-0.115128	0.12689	-0.0902233
1_UPTAG0769	1	YBR067C	TIP1	UPTAG0769	-0.113691	-0.114053	-0.252785	0.0829083
1_UPTAG0770	1	YGR032W	GSC2	UPTAG0770	-0.3013	-0.290396	-0.615383	0.19886
1_UPTAG0771	1	YLR342W	FKS1	UPTAG0771	0.339489	-0.183301	0.135279	0.124443
1_UPTAG0772	1	YLR433C	CNA1	UPTAG0772	-0.136759	-0.0506042	-0.216874	0.0233563
1_UPTAG0773	1	YKL190W	CNB1	UPTAG0773	-0.149983	0.304904	0.116412	-0.104005
1_UPTAG0774	1	YLR300W	EXG1	UPTAG0774	-0.293678	0.984887	0.655638	-0.730407
1_UPTAG0775	1	YHR143W	DSE2	UPTAG0775	-0.45799	0.17836	-0.312812	0.115953
1_UPTAG0776	1	YGR143W	SKN1	UPTAG0776	0.324192	-0.196898	0.0979652	-0.0138211
1_UPTAG0777	1	YPR159W	KRE6	UPTAG0777	1.58277	-0.486696	1.07356	0.285236
1_UPTAG0778	1	YNL090W	RHO2	UPTAG0778	-0.515211	-0.10669	-0.671426	0.0930421
1_UPTAG0780	1	YPL053C	KTR6	UPTAG0780	0.0984896	-0.183664	-0.104034	-0.0368627
1_UPTAG0781	1	YNL029C	KTR5	UPTAG0781	-0.229178	0.0245463	-0.230964	-0.0880737
1_UPTAG0782	1	YIL085C	KTR7	UPTAG0782	-0.0750242	0.061145	-0.0367306	-0.0509136
1_UPTAG0783	1	YBR205W	KTR3	UPTAG0783	-0.133885	0.181619	0.0271827	-0.0504455
1_UPTAG0784	1	YHR030C	SLT2	UPTAG0784	-0.0228366	-0.00815788	-0.0565368	-0.0241325
1_UPTAG0785	1	YCR017C	CWH43	UPTAG0785	0.0873955	-0.0822973	-0.0199899	0.0390498
1_UPTAG0786	1	YLR110C	CCW12	UPTAG0786	0.28843	0.0932247	0.357571	0.0271591
1_UPTAG0787	1	YOL109W	ZEO1	UPTAG0787	-0.199538	0.0695388	-0.152086	0.0311293
1_UPTAG0788	1	YGR229C	SMI1	UPTAG0788	-0.118962	0.199985	0.0625932	-0.0632495
1_UPTAG0789	1	YDR420W	HKR1	UPTAG0789	0.188426	0.00567238	0.168103	-0.239711
1_UPTAG0790	1	YCL048W	SPS22	UPTAG0790	-0.355884	-0.0223664	-0.401614	0.0171644
1_UPTAG0791	1	YGL178W	MPT5	UPTAG0791	0.479622	0.0844854	0.539528	-0.31781
1_UPTAG0793	1	YBL007C	SLA1	UPTAG0793	0.143776	0.0326854	0.15457	-0.0800996
1_UPTAG0795	1	YLR425W	TUS1	UPTAG0795	0.211203	-0.0674273	0.111954	0.00291671
1_UPTAG0796	1	YLR371W	ROM2	UPTAG0796	0.0607784	-0.0628656	-0.0270383	0.0278533
1_UPTAG0797	1	YGR070W	ROM1	UPTAG0797	0.265004	-0.201992	0.0249017	-0.0477455
1_UPTAG0798	1	YER155C	BEM2	UPTAG0798	0.0580345	-0.407986	-0.394042	-0.0203414
1_UPTAG0799	1	YKL096W-A	CWP2	UPTAG0799	0.138031	0.115198	0.221296	-0.0788345
1_UPTAG0800	1	YKL164C	PIR1	UPTAG0800	0.235855	-0.198313	0.00462533	0.115911
1_UPTAG0801	1	YGR059W	SPR3	UPTAG0801	0.0810388	-0.139645	-0.0791269	0.0469854
1_UPTAG0802	1	YDR218C	SPR28	UPTAG0802	0.157775	-0.0568818	0.0797162	-0.0277584
1_UPTAG0803	1	YJR137C	MET5	UPTAG0803	-0.115275	-0.0162859	-0.157808	0.0994479
1_UPTAG0804	1	YCL051W	LRE1	UPTAG0804	0.231167	-0.154907	0.0512173	0.0173842
1_UPTAG0805	1	YNL283C	WSC2	UPTAG0805	0.325986	0.71293	0.924692	-0.54227
1_UPTAG0806	1	YHL028W	WSC4	UPTAG0806	-0.258933	-0.0336521	-0.315143	-0.100667
1_UPTAG0807	1	YLR332W	MID2	UPTAG0807	-0.139949	0.15137	-0.0210557	-0.0791806
1_UPTAG0808	1	YOL105C	WSC3	UPTAG0808	0.169705	0.8731	1.01055	-0.348445
1_UPTAG0809	1	YOR008C	SLG1	UPTAG0809	0.227563	-0.182184	0.0223508	0.218154
1_UPTAG0811	1	YDL223C	HBT1	UPTAG0811	-0.400275	0.0145788	-0.411013	0.0732953
1_UPTAG0812	1	YNL325C	FIG4	UPTAG0812	-0.187047	-0.053692	-0.263378	-0.0336912
1_UPTAG0813	1	YCR089W	FIG2	UPTAG0813	0.0172161	-0.125112	-0.131308	0.0367992
1_UPTAG0814	1	YBR040W	FIG1	UPTAG0814	-0.0799367	-0.0279139	-0.135927	0.0584174
1_UPTAG0815	1	YNR032C-A	HUB1	UPTAG0815	-0.0834924	-0.128519	-0.234909	0.0299968
1_UPTAG0816	1	YAR014C	BUD14	UPTAG0816	-0.0740796	-0.0549341	-0.155457	-0.0471421
1_UPTAG0817	1	YHR158C	KEL1	UPTAG0817	-0.00390349	0.0149182	-0.0175128	-0.0180556
1_UPTAG0818	1	YNL233W	BNI4	UPTAG0818	0.375797	-0.11734	0.147837	0.0010189
1_UPTAG0819	1	YMR022W	UBC7	UPTAG0819	0.226993	0.149731	0.354859	-0.012735
1_UPTAG0820	1	YGR279C	SCW4	UPTAG0820	-0.0280715	0.129957	0.0780917	-0.0185546
1_UPTAG0821	1	YMR305C	SCW10	UPTAG0821	0.0641691	0.283971	0.315912	-0.0286583
1_UPTAG0822	1	YGR238C	KEL2	UPTAG0822	0.27131	-0.123537	0.115022	0.12109
1_UPTAG0823	1	YBR129C	OPY1	UPTAG0823	0.23588	-0.135691	0.0746647	0.0741658
1_UPTAG0824	1	YJL108C	PRM10	UPTAG0824	-0.302131	0.200862	-0.0962203	0.0367026
1_UPTAG0825	1	YIL037C	PRM2	UPTAG0825	0.266883	-0.0417508	0.197727	0.0229127
1_UPTAG0826	1	YPL156C	PRM4	UPTAG0826	-0.221006	0.129861	-0.116729	0.0594548
1_UPTAG0827	1	YIL117C	PRM5	UPTAG0827	0.0983465	-0.223275	-0.158008	0.0206119
1_UPTAG0828	1	YML047C	PRM6	UPTAG0828	0.000540629	-0.10685	-0.13049	0.057755
1_UPTAG0830	1	YJL170C	ASG7	UPTAG0830	0.145441	0.0461107	0.168157	-0.16798
1_UPTAG0831	1	YCL027W	FUS1	UPTAG0831	-0.305578	0.20147	-0.127844	-0.156999
1_UPTAG0832	1	YKL032C	IXR1	UPTAG0832	1.18588	0.384953	1.53561	0.129297
1_UPTAG0833	1	YOR067C	ALG8	UPTAG0833	-0.130251	-0.0525648	-0.223261	-0.00201152
1_UPTAG0834	1	YMR015C	ERG5	UPTAG0834	0.21222	0.0373185	0.224856	-0.0139255
1_UPTAG0835	1	YLR056W	ERG3	UPTAG0835	0.361675	-0.142272	0.196042	0.107737
1_UPTAG0838	1	YGL012W	ERG4	UPTAG0838	0.199369	0.122131	0.296878	-0.00703783
1_UPTAG0839	1	YML075C	HMG1	UPTAG0839	0.0767664	-0.0114002	0.0391861	-0.00408843
1_UPTAG0840	1	YLR450W	HMG2	UPTAG0840	-0.141929	-0.194381	-0.361094	0.159061
1_UPTAG0841	1	YER044C	ERG28	UPTAG0841	1.13015	-0.200412	0.906045	0.285157
1_UPTAG0842	1	YML008C	ERG6	UPTAG0842	-0.403972	0.265068	-0.156478	-0.0156416
1_UPTAG0843	1	YOR188W	MSB1	UPTAG0843	0.21499	-0.214765	-0.034816	0.0727156
1_UPTAG0844	1	YPL161C	BEM4	UPTAG0844	0.462932	-0.240532	0.190149	0.195766
1_UPTAG0845	1	YML109W	ZDS2	UPTAG0845	-0.146721	-0.0817964	-0.254988	-0.0831495
1_UPTAG0846	1	YGR014W	MSB2	UPTAG0846	0.107144	-0.143987	-0.0625646	-0.0287346
1_UPTAG0847	1	YBL085W	BOI1	UPTAG0847	-0.11709	0.104781	-0.0385599	-0.0403
1_UPTAG0848	1	YER114C	BOI2	UPTAG0848	-0.13628	0.317864	0.142303	0.00680931
1_UPTAG0849	1	YBR200W	BEM1	UPTAG0849	-0.14771	0.0641985	-0.108624	-0.00312959
1_UPTAG0850	1	YCR088W	ABP1	UPTAG0850	0.211424	0.189381	0.365436	-0.0504912
1_UPTAG0851	1	YMR273C	ZDS1	UPTAG0851	-0.120181	-0.0547581	-0.200511	-0.148136
1_UPTAG0852	1	YPL115C	BEM3	UPTAG0852	0.383382	-0.169079	0.174851	0.208787
1_UPTAG0853	1	YHR061C	GIC1	UPTAG0853	-0.0155793	0.035727	-0.00312688	0.0360449
1_UPTAG0854	1	YDR309C	GIC2	UPTAG0854	-0.040599	0.200486	0.135315	-0.0887152
1_UPTAG0856	1	YAR050W	FLO1	UPTAG0856	0.0345383	0.238109	0.248183	-0.0708463
1_UPTAG0857	1	YKR102W	FLO10	UPTAG0857	-0.0620987	0.0359916	-0.0502611	-0.0632624
1_UPTAG0858	1	YHR211W	FLO5	UPTAG0858	-0.111275	-0.016306	-0.147255	-0.0201469
1_UPTAG0859	1	YAL063C	FLO9	UPTAG0859	-0.177974	-0.0938024	-0.294955	0.0401145
1_UPTAG0860	1	YLR299W	ECM38	UPTAG0860	-0.0896118	0.0805539	-0.0609825	-0.209565
1_UPTAG0861	1	YPL180W	TCO89	UPTAG0861	-0.14299	0.0346322	-0.128743	0.82295
1_UPTAG0862	1	YJL062W	LAS21	UPTAG0862	-0.0909427	0.0432089	-0.0697172	0.0187789
1_UPTAG0863	1	YOR107W	RGS2	UPTAG0863	-0.118774	-0.168077	-0.311721	0.190668
1_UPTAG0864	1	YKL130C	SHE2	UPTAG0864	0.865165	-0.11255	0.732292	0.0478065
1_UPTAG0865	1	YAL029C	MYO4	UPTAG0865	0.483695	0.117646	0.572099	-0.0509903
1_UPTAG0866	1	YBR130C	SHE3	UPTAG0866	1.08927	-0.349429	0.70628	0.141592
1_UPTAG0867	1	YML006C	GIS4	UPTAG0867	0.159841	-0.0838071	0.0540587	0.265683
1_UPTAG0868	1	YLR094C	GIS3	UPTAG0868	-0.10549	-0.214752	-0.351247	0.0989205
1_UPTAG0870	1	YPL049C	DIG1	UPTAG0870	0.323381	0.0459842	0.358374	-0.119542
1_UPTAG0871	1	YDR480W	DIG2	UPTAG0871	-0.212713	1.02001	0.698593	-0.926347
1_UPTAG0872	1	YGR040W	KSS1	UPTAG0872	-0.047436	-0.0205358	-0.0909071	-0.0355296
1_UPTAG0873	1	YBR095C	RXT2	UPTAG0873	0.701153	-0.153019	0.519207	-0.202462
1_UPTAG0874	1	YOR080W	DIA2	UPTAG0874	-0.124637	0.0434457	-0.110435	-0.125533
1_UPTAG0875	1	YPL192C	PRM3	UPTAG0875	0.654614	-0.184338	0.445446	-0.35527
1_UPTAG0876	1	YMR065W	KAR5	UPTAG0876	-0.120741	0.114661	-0.0312989	0.0971355
1_UPTAG0877	1	YMR313C	TGL3	UPTAG0877	-0.0174639	0.0422182	-0.000836824	0.110474
1_UPTAG0879	1	YKL116C	PRR1	UPTAG0879	0.0722655	-0.00360748	0.0495803	-0.051552
1_UPTAG0881	1	YIL113W	SDP1	UPTAG0881	-0.200263	0.0613706	-0.164403	-0.0262905
1_UPTAG0882	1	YDR466W	PKH3	UPTAG0882	-0.248342	0.0460269	-0.227306	0.187995
1_UPTAG0883	1	YDL227C	HO	UPTAG0883	-0.568407	0.0357869	-0.611699	0.0145771
1_UPTAG0884	1	YMR275C	BUL1	UPTAG0884	0.375855	-0.332803	0.0247522	0.408235
1_UPTAG0886	1	YOR320C	GNT1	UPTAG0886	0.137105	-0.0851333	0.0123023	-0.110988
1_UPTAG0887	1	YGL226C-A	OST5	UPTAG0887	0.027049	-0.174896	-0.178788	-0.0604013
1_UPTAG0888	1	YPL227C	ALG5	UPTAG0888	0.122312	0.743898	0.879897	-0.3292
1_UPTAG0889	1	YJR131W	MNS1	UPTAG0889	0.386786	-0.0579671	0.275257	-0.396251
1_UPTAG0890	1	YBR199W	KTR4	UPTAG0890	0.356854	-0.210999	0.119394	0.0771527
1_UPTAG0891	1	YEL036C	ANP1	UPTAG0891	0.288924	-0.194518	0.0752212	0.206305
1_UPTAG0893	1	YML115C	VAN1	UPTAG0893	0.476806	-0.108574	0.324831	0.158601
1_UPTAG0895	1	YGR227W	DIE2	UPTAG0895	-0.421892	0.293812	-0.128643	-0.00142028
1_UPTAG0896	1	YKR061W	KTR2	UPTAG0896	-0.314763	-0.00110463	-0.36661	0.0978093
1_UPTAG0897	1	YJL139C	YUR1	UPTAG0897	0.333715	-0.0934545	0.214639	0.0415612
1_UPTAG0898	1	YGR036C	CAX4	UPTAG0898	1.3627	-0.473439	0.856633	0.243259
1_UPTAG0899	1	YGL257C	MNT2	UPTAG0899	-0.230042	-0.0893283	-0.344166	0.0808483
1_UPTAG0900	1	YIL014W	MNT3	UPTAG0900	0.0883273	0.0211391	0.0788351	0.0518241
1_UPTAG0901	1	YNR059W	MNT4	UPTAG0901	0.145175	-0.176878	-0.0855289	0.0762727
1_UPTAG0902	1	YAL023C	PMT2	UPTAG0902	-0.111361	-0.00507547	-0.143497	0.122966
1_UPTAG0903	1	YOR321W	PMT3	UPTAG0903	0.320269	-0.028924	0.266405	-0.186178
1_UPTAG0904	1	YJR143C	PMT4	UPTAG0904	-0.0438741	0.0133393	-0.0555629	0.112789
1_UPTAG0905	1	YDL093W	PMT5	UPTAG0905	0.0440947	0.78411	0.771537	-0.748971
1_UPTAG0906	1	YGR199W	PMT6	UPTAG0906	-0.209412	0.127288	-0.103593	-0.0657231
1_UPTAG0907	1	YDL095W	PMT1	UPTAG0907	0.537262	-0.382404	0.128433	0.0710076
1_UPTAG0908	1	YDR483W	KRE2	UPTAG0908	-0.383889	0.87382	0.458685	-0.747779
1_UPTAG0909	1	YOR099W	KTR1	UPTAG0909	-0.209598	0.05217	-0.179793	-0.0223919
1_UPTAG0910	1	YER001W	MNN1	UPTAG0910	0.042692	-0.08538	-0.0857558	0.0905873
1_UPTAG0911	1	YBR260C	RGD1	UPTAG0911	-0.35973	0.351711	-0.0200745	-0.0379809
1_UPTAG0912	1	YLR006C	SSK1	UPTAG0912	0.505631	0.269581	0.735523	-0.547882
1_UPTAG0913	1	YOR219C	STE13	UPTAG0913	-0.124933	-0.200899	-0.350037	0.0654104
1_UPTAG0914	1	YJR117W	STE24	UPTAG0914	-0.0868703	-0.0688415	-0.184716	0.00108389
1_UPTAG0916	1	YLR133W	CKI1	UPTAG0916	-0.571263	0.0198591	-0.573756	0.178797
1_UPTAG0917	1	YNL130C	CPT1	UPTAG0917	0.0673392	-0.256616	-0.211574	0.148073
1_UPTAG0918	1	YGR157W	CHO2	UPTAG0918	0.204695	-0.162014	0.0180829	-0.0783462
1_UPTAG0919	1	YJR073C	OPI3	UPTAG0919	-0.22466	-0.00862532	-0.257949	0.0624806
1_UPTAG0920	1	YNL169C	PSD1	UPTAG0920	-0.261602	0.136641	-0.145791	-0.0799861
1_UPTAG0921	1	YGR202C	PCT1	UPTAG0921	-0.567037	0.13512	-0.455628	-0.0450315
1_UPTAG0923	1	YOL011W	PLB3	UPTAG0923	0.126782	0.296596	0.421123	-0.00300099
1_UPTAG0924	1	YBR042C	CST26	UPTAG0924	0.116875	0.621926	0.701376	-0.202479
1_UPTAG0926	1	YBL011W	SCT1	UPTAG0926	-0.135756	0.0153723	-0.144043	-0.157127
1_UPTAG0927	1	YPR140W	TAZ1	UPTAG0927	0.0885865	-0.0834896	-0.0186184	-0.116763
1_UPTAG0928	1	YGL126W	SCS3	UPTAG0928	0.146969	-0.329142	-0.204942	0.186207
1_UPTAG0929	1	YBR030W	RKM3	UPTAG0929	0.291035	-0.142423	0.123882	-0.0103353
1_UPTAG0930	1	YDR503C	LPP1	UPTAG0930	-0.241263	-0.0687895	-0.335448	0.141771
1_UPTAG0931	1	YNL279W	PRM1	UPTAG0931	-0.280497	0.629386	0.341718	-0.171268
1_UPTAG0932	1	YMR232W	FUS2	UPTAG0932	0.176025	-0.139166	-0.00602464	0.121159
1_UPTAG0933	1	YNL053W	MSG5	UPTAG0933	-0.0248612	-0.169909	-0.218062	0.0546635
1_UPTAG0934	1	YDR075W	PPH3	UPTAG0934	-0.35544	-0.0317135	-0.412664	0.00610606
1_UPTAG0935	1	YDL006W	PTC1	UPTAG0935	0.316069	-0.225375	0.0287997	0.000384961
1_UPTAG0936	1	YBL056W	PTC3	UPTAG0936	-0.36292	0.489398	0.0408259	-0.0892994
1_UPTAG0937	1	YER075C	PTP3	UPTAG0937	-0.170187	1.12439	0.920791	-0.30517
1_UPTAG0939	1	YNL048W	ALG11	UPTAG0939	0.289119	-0.10292	0.150656	0.0780638
1_UPTAG0940	1	YBR015C	MNN2	UPTAG0940	0.623388	-0.0386613	0.555925	-0.131165
1_UPTAG0941	1	YJL186W	MNN5	UPTAG0941	-0.18565	0.158816	-0.0435332	-0.0234053
1_UPTAG0943	1	YEL042W	GDA1	UPTAG0943	-0.202239	0.143754	-0.0968642	-0.159582
1_UPTAG0944	1	YER005W	YND1	UPTAG0944	0.225789	-0.0190047	0.180167	-0.0830379
1_UPTAG0945	1	YMR101C	SRT1	UPTAG0945	-0.140379	0.110547	-0.0587164	0.0654271
1_UPTAG0946	1	YBL082C	ALG3	UPTAG0946	0.00998879	0.135893	0.122175	-0.229304
1_UPTAG0947	1	YNR030W	ALG12	UPTAG0947	0.0355328	0.00124546	0.00927056	-0.0447943
1_UPTAG0948	1	YEL031W	SPF1	UPTAG0948	0.527968	-0.243704	0.259666	0.0933038
1_UPTAG0949	1	YNL219C	ALG9	UPTAG0949	-0.0765189	0.191136	0.092473	-0.122707
1_UPTAG0950	1	YOR002W	ALG6	UPTAG0950	0.406536	0.562483	0.888079	-0.27406
1_UPTAG0951	1	YHR082C	KSP1	UPTAG0951	-0.317888	0.134002	-0.212238	-0.047361
1_UPTAG0952	1	YER027C	GAL83	UPTAG0952	-0.0628081	0.262004	0.166523	-0.0249464
1_UPTAG0953	1	YOL016C	CMK2	UPTAG0953	0.699097	-0.256017	0.41879	-0.155943
1_UPTAG0954	1	YFR014C	CMK1	UPTAG0954	0.839284	-0.0598302	0.758206	0.0290791
1_UPTAG0955	1	YHR135C	YCK1	UPTAG0955	0.10417	0.0741934	0.152497	-0.0760241
1_UPTAG0956	1	YNL154C	YCK2	UPTAG0956	-0.0813214	0.0564209	-0.0490421	-0.00241304
1_UPTAG0957	1	YNL307C	MCK1	UPTAG0957	0.0545613	-0.0614938	-0.0315835	0.0547805
1_UPTAG0958	1	YBL016W	FUS3	UPTAG0958	0.176416	0.362898	0.49654	-0.281781
1_UPTAG0959	1	YLR113W	HOG1	UPTAG0959	0.25078	-0.214703	0.0193551	0.205392
1_UPTAG0960	1	YPR054W	SMK1	UPTAG0960	0.0685398	-0.0556121	-0.00892993	0.149293
1_UPTAG0961	1	YOR231W	MKK1	UPTAG0961	-0.0930459	0.0324178	-0.0922076	0.0945972
1_UPTAG0963	1	YPL140C	MKK2	UPTAG0963	-0.162157	0.0604394	-0.130267	-0.125596
1_UPTAG0964	1	YCR073C	SSK22	UPTAG0964	-0.0775058	0.277759	0.176186	-0.0548122
1_UPTAG0966	1	YNR031C	SSK2	UPTAG0966	-0.013249	0.140863	0.102305	0.0233056
1_UPTAG0967	1	YJL095W	BCK1	UPTAG0967	-0.220986	-0.114123	-0.369324	0.107453
1_UPTAG0969	1	YNL298W	CLA4	UPTAG0969	-0.0218756	-0.145197	-0.194299	0.17516
1_UPTAG0970	1	YNL020C	ARK1	UPTAG0970	-0.398701	0.179467	-0.243936	-0.037227
1_UPTAG0971	1	YOL113W	SKM1	UPTAG0971	0.279356	0.0605278	0.313812	-0.0274704
1_UPTAG0972	1	YGR262C	BUD32	UPTAG0972	-0.198965	0.134299	-0.0960164	0.109956
1_UPTAG0973	1	YDR523C	SPS1	UPTAG0973	0.0504836	0.128741	0.155	0.0273502
1_UPTAG0975	1	YJL164C	TPK1	UPTAG0975	-0.0393603	-0.046974	-0.119714	-0.105159
1_UPTAG0976	1	YPL203W	TPK2	UPTAG0976	0.431982	-0.0125756	0.399251	-0.414484
1_UPTAG0977	1	YKL166C	TPK3	UPTAG0977	-0.0606666	0.149961	0.0665913	0.0481945
1_UPTAG0979	1	YIL015W	BAR1	UPTAG0979	-0.440245	0.0211	-0.462461	0.105931
1_UPTAG0980	1	YOR003W	YSP3	UPTAG0980	-0.185055	0.255527	0.046516	-0.208743
1_UPTAG0981	1	YHL030W	ECM29	UPTAG0981	0.389828	-0.298291	0.0595321	-0.0500977
1_UPTAG0982	1	YHR184W	SSP1	UPTAG0982	0.0411902	0.140196	0.15568	-0.177648
1_UPTAG0983	1	YDL239C	ADY3	UPTAG0983	0.0257282	0.250063	0.258861	-0.0659054
1_UPTAG0984	1	YOR124C	UBP2	UPTAG0984	-0.152494	-0.157309	-0.336788	0.152459
1_UPTAG0985	1	YER151C	UBP3	UPTAG0985	0.159822	0.147215	0.277147	-0.131844
1_UPTAG0986	1	YKL117W	SBA1	UPTAG0986	0.0214696	0.0238945	0.00590647	-0.145578
1_UPTAG0987	1	YPL106C	SSE1	UPTAG0987	0.919283	-0.161463	0.741975	-0.165856
1_UPTAG0988	1	YMR214W	SCJ1	UPTAG0988	-0.169945	-0.0452304	-0.246166	0.00765734
1_UPTAG0989	1	YML111W	BUL2	UPTAG0989	-0.00194437	-0.030157	-0.0542511	-0.0849195
1_UPTAG0990	1	YJR036C	HUL4	UPTAG0990	-0.327865	0.349831	0.00204326	-0.0365106
1_UPTAG0991	1	YGL141W	HUL5	UPTAG0991	-0.225687	1.51914	1.06617	-1.11679
1_UPTAG0993	1	YLR389C	STE23	UPTAG0993	-0.467953	0.0174519	-0.483	0.113577
1_UPTAG0994	1	YDR251W	PAM1	UPTAG0994	-0.233146	0.0131555	-0.253533	0.0188485
1_UPTAG0996	1	YPL021W	ECM23	UPTAG0996	-0.221925	-0.128345	-0.379165	0.112452
1_UPTAG0997	1	YOR032C	HMS1	UPTAG0997	-0.3566	0.171957	-0.20439	-0.135779
1_UPTAG0998	1	YMR016C	SOK2	UPTAG0998	-0.0517396	0.142653	0.0680018	-0.200729
1_UPTAG0999	1	YDL024C	DIA3	UPTAG0999	-0.278637	-0.106881	-0.412734	-0.102784
1_UPTAG1000	1	YDL035C	GPR1	UPTAG1000	-0.315029	0.0502356	-0.289368	-0.0779463
1_UPTAG1001	1	YMR238W	DFG5	UPTAG1001	-0.0276157	0.423531	0.34378	-0.287542
1_UPTAG1002	1	YLR353W	BUD8	UPTAG1002	0.229063	0.0792188	0.278717	-0.32844
1_UPTAG1003	1	YMR316W	DIA1	UPTAG1003	0.214183	-0.0921837	0.0875935	-0.037522
1_UPTAG1004	1	YIR019C	FLO11	UPTAG1004	0.00153981	0.0619427	0.0387621	-0.100758
1_UPTAG1005	1	YER118C	SHO1	UPTAG1005	0.27359	-0.0905021	0.15635	-0.0117132
1_UPTAG1007	1	YJR153W	PGU1	UPTAG1007	-0.0357636	0.185472	0.124977	-0.0291036
1_UPTAG1008	1	YCR038C	BUD5	UPTAG1008	0.4225	0.115988	0.506264	-0.182281
1_UPTAG1009	1	YER109C	FLO8	UPTAG1009	-0.291972	0.158682	-0.152844	-0.0669063
1_UPTAG1010	1	YMR164C	MSS11	UPTAG1010	-0.0404228	-0.123908	-0.191209	0.10503
1_UPTAG1011	1	YBR083W	TEC1	UPTAG1011	-0.0762883	0.0906159	-0.0235841	-0.0450791
1_UPTAG1013	1	YOL081W	IRA2	UPTAG1013	0.321654	-0.0914464	0.200114	-0.286317
1_UPTAG1014	1	YLL016W	SDC25	UPTAG1014	-0.301901	0.260605	-0.0710943	-0.109887
1_UPTAG1016	1	YMR172W	HOT1	UPTAG1016	-0.0278194	0.0839545	0.0383572	-0.075407
1_UPTAG1018	1	YDR496C	PUF6	UPTAG1018	0.0944478	0.566851	0.634856	0.275687
1_UPTAG1019	1	YCR097W	HMRA1	UPTAG1019	-0.154814	0.216068	0.0412134	-0.110133
1_UPTAG1020	1	YOR129C	AFI1	UPTAG1020	0.0389384	0.468585	0.483086	0.0497949
1_UPTAG1021	1	YPL004C	LSP1	UPTAG1021	-0.0668438	0.443392	0.370716	-0.144808
1_UPTAG1022	1	YDR162C	NBP2	UPTAG1022	-0.266981	0.96768	0.690769	0.1893
1_UPTAG1024	1	YMR175W	SIP18	UPTAG1024	-0.0945186	0.378993	0.269481	0.0152982
1_UPTAG1025	1	YMR092C	AIP1	UPTAG1025	-0.378906	0.153423	-0.250161	-0.02286
1_UPTAG1026	1	YPL152W	RRD2	UPTAG1026	-0.218601	0.16272	-0.0816843	0.183212
1_UPTAG1028	1	YKL026C	GPX1	UPTAG1028	0.0892859	0.0617232	0.126134	0.0172293
1_UPTAG1029	1	YBR244W	GPX2	UPTAG1029	-0.18333	0.218028	-0.0120667	0.059016
1_UPTAG1030	1	YPL196W	OXR1	UPTAG1030	-0.0868642	0.53445	0.425988	0.297681
1_UPTAG1031	1	YCL033C	MXR2	UPTAG1031	-1.24175	1.56169	0.292488	-1.08245
1_UPTAG1032	1	YER042W	MXR1	UPTAG1032	0.303671	-0.149606	0.131127	0.0255514
1_UPTAG1033	1	YIR037W	HYR1	UPTAG1033	-0.397747	0.0965275	-0.332149	0.174692
1_UPTAG1034	1	YER174C	GRX4	UPTAG1034	-0.360946	0.297845	-0.0927827	0.169782
1_UPTAG1035	1	YDR098C	GRX3	UPTAG1035	-0.677793	0.872259	0.173989	0.0282272
1_UPTAG1036	1	YCL035C	GRX1	UPTAG1036	0.0410837	-0.0042965	0.0120062	-0.098688
1_UPTAG1037	1	YFL026W	STE2	UPTAG1037	-0.0586359	1.98765	1.75813	-0.79681
1_UPTAG1038	1	YNL091W	NST1	UPTAG1038	0.519566	-0.135411	0.359692	0.0702494
1_UPTAG1039	1	YER019W	ISC1	UPTAG1039	0.184654	-0.0868275	0.0789755	-0.023337
1_UPTAG1040	1	YNR074C	AIF1	UPTAG1040	0.137861	-0.218259	-0.112454	-1.63791
1_UPTAG1041	1	YOR010C	TIR2	UPTAG1041	-0.0523342	-0.0660556	-0.144463	-0.0191871
1_UPTAG1042	1	YOR324C	FRT1	UPTAG1042	0.151433	0.400431	0.497613	-0.392847
1_UPTAG1043	1	YAL028W	FRT2	UPTAG1043	-0.413149	-0.00512831	-0.446532	0.1065
1_UPTAG1044	1	YGR234W	YHB1	UPTAG1044	0.184207	0.850487	0.886602	-0.902594
1_UPTAG1045	1	YOL151W	GRE2	UPTAG1045	-0.623219	-0.176303	-0.820176	0.120599
1_UPTAG1046	1	YER011W	TIR1	UPTAG1046	0.0921011	-0.319522	-0.258441	0.0321586
1_UPTAG1047	1	YPL240C	HSP82	UPTAG1047	-0.0226208	0.146466	0.0987121	-0.0375841
1_UPTAG1048	1	YIL033C	BCY1	UPTAG1048	0.131788	-0.082531	0.0245725	0.229374
1_UPTAG1049	1	YDR017C	KCS1	UPTAG1049	-0.637284	-0.0601672	-0.730777	0.310892
1_UPTAG1050	1	YNL160W	YGP1	UPTAG1050	-0.234368	0.0743081	-0.191229	0.0144524
1_UPTAG1051	1	YPL223C	GRE1	UPTAG1051	-0.0635319	0.119924	0.031873	-0.0407069
1_UPTAG1052	1	YDR184C	ATC1	UPTAG1052	-0.147331	0.00356114	-0.168412	0.0147703
1_UPTAG1053	1	YBR082C	UBC4	UPTAG1053	1.00695	-0.0183378	0.960962	0.610029
1_UPTAG1054	1	YDR171W	HSP42	UPTAG1054	0.0219682	-0.00949039	-0.0144918	0.0997736
1_UPTAG1055	1	YHL048W	COS8	UPTAG1055	-0.0663607	0.461933	0.368853	-0.0885125
1_UPTAG1057	1	YPR040W	TIP41	UPTAG1057	0.341131	0.0835433	0.403414	0.158819
1_UPTAG1058	1	YIL047C	SYG1	UPTAG1058	0.619061	-0.0490352	0.523298	-0.391646
1_UPTAG1059	1	YBR077C	SLM4	UPTAG1059	0.622144	-0.369045	0.227887	0.476178
1_UPTAG1060	1	YGL121C	GPG1	UPTAG1060	-0.162073	-0.0659425	-0.2611	0.0974385
1_UPTAG1061	1	YOR371C	GPB1	UPTAG1061	-0.0344308	0.0597663	-0.00194826	-0.258026
1_UPTAG1066	1	YNL145W	MFA2	UPTAG1066	-0.167206	0.176258	-0.0131653	-0.0173211
1_UPTAG1069	1	YNL173C	MDG1	UPTAG1069	0.0840943	0.162428	0.223214	-0.216155
1_UPTAG1072	1	YDR085C	AFR1	UPTAG1072	0.0294595	0.0460986	0.0508608	-0.0764742
1_UPTAG1074	1	YDR284C	DPP1	UPTAG1074	-0.0784818	0.242767	0.145838	-0.0891689
1_UPTAG1075	1	YFL047W	RGD2	UPTAG1075	-0.0598109	-0.145054	-0.243525	0.0423629
1_UPTAG1076	1	YOR134W	BAG7	UPTAG1076	0.137941	-0.192079	-0.0807253	0.0349299
1_UPTAG1077	1	YDL240W	LRG1	UPTAG1077	0.188496	-0.115362	0.0465608	0.022493
1_UPTAG1078	1	YDR389W	SAC7	UPTAG1078	0.545488	-0.269569	0.249863	-0.124741
1_UPTAG1079	1	YDR403W	DIT1	UPTAG1079	0.0242873	-0.262207	-0.263899	0.134651
1_UPTAG1080	1	YDR402C	DIT2	UPTAG1080	0.0240282	0.195089	0.192086	-0.0151166
1_UPTAG1081	1	YLR307W	CDA1	UPTAG1081	0.0775349	-0.236965	-0.203156	0.160166
1_UPTAG1082	1	YLR308W	CDA2	UPTAG1082	0.133681	0.426791	0.536383	-0.251709
1_UPTAG1084	1	YHR185C	PFS1	UPTAG1084	-0.24789	0.0941661	-0.182444	0.259326
1_UPTAG1085	1	YDR104C	SPO71	UPTAG1085	-0.0830527	-0.241706	-0.346493	0.0574383
1_UPTAG1086	1	YHR139C	SPS100	UPTAG1086	0.0377332	-0.166046	-0.151855	0.30659
1_UPTAG1087	1	YOR242C	SSP2	UPTAG1087	0.0446732	-0.204836	-0.270325	-0.0985139
1_UPTAG1088	1	YBR045C	GIP1	UPTAG1088	0.0564675	-0.203919	-0.177986	0.0608013
1_UPTAG1089	1	YOR298W	MUM3	UPTAG1089	0.0254695	0.217114	0.243389	-0.0802513
1_UPTAG1090	1	YDR260C	SWM1	UPTAG1090	-0.0289972	-0.105553	-0.159448	0.369001
1_UPTAG1091	1	YNL204C	SPS18	UPTAG1091	-0.244733	0.0832731	-0.179365	0.0548088
1_UPTAG1092	1	YER132C	PMD1	UPTAG1092	-0.157624	-0.13494	-0.321605	-0.145723
1_UPTAG1093	1	YOR190W	SPR1	UPTAG1093	0.226832	0.0246114	0.221104	-0.065921
1_UPTAG1094	1	YMR063W	RIM9	UPTAG1094	0.0837025	0.02108	0.0800151	0.0153104
1_UPTAG1095	1	YHR153C	SPO16	UPTAG1095	-0.190327	-0.0457474	-0.263394	0.0615577
1_UPTAG1096	1	YER115C	SPR6	UPTAG1096	0.234912	-0.134833	0.0753537	0.211495
1_UPTAG1097	1	YIL099W	SGA1	UPTAG1097	-0.232425	-0.0212998	-0.277077	0.161366
1_UPTAG1099	1	YNL098C	RAS2	UPTAG1099	0.0997504	0.066824	0.142516	0.00742344
1_UPTAG1100	1	YGR225W	AMA1	UPTAG1100	0.0589403	0.277253	0.315844	0.00104761
1_UPTAG1101	1	YDR522C	SPS2	UPTAG1101	0.0765351	0.14257	0.193533	0.157171
1_UPTAG1102	1	YNL294C	RIM21	UPTAG1102	0.175937	0.0484969	0.20124	0.115109
1_UPTAG1103	1	YOR313C	SPS4	UPTAG1103	-0.341261	0.265058	-0.0980653	-0.0311273
1_UPTAG1104	1	YBL058W	SHP1	UPTAG1104	0.408429	0.0802799	0.485839	0.112324
1_UPTAG1105	1	YAL009W	SPO7	UPTAG1105	0.0705556	-0.00165031	0.0255441	-0.0091236
1_UPTAG1106	1	YLR341W	SPO77	UPTAG1106	0.395109	-0.0351706	0.336584	-0.0546749
1_UPTAG1107	1	YHR004C	NEM1	UPTAG1107	-0.32587	0.107107	-0.253065	-0.0167619
1_UPTAG1108	1	YER177W	BMH1	UPTAG1108	-0.00184859	-0.000499593	-0.0269576	-0.161872
1_UPTAG1109	1	YDR099W	BMH2	UPTAG1109	-0.047076	0.434575	0.332222	-0.255484
1_UPTAG1110	1	YIR026C	YVH1	UPTAG1110	-0.0978464	0.0310154	-0.0984038	0.164508
1_UPTAG1111	1	YGL181W	GTS1	UPTAG1111	-0.0443713	0.540917	0.364769	-0.129986
1_UPTAGbre1KO	1	BRE1_Plate1	BRE1	UPTAGbre1KO	-2.95284	0.276462	-2.70169	-0.250258
1_UPTAGdot1KO	1	DOT1_Plate1	DOT1	UPTAGdot1KO	0.562962	-1.35236	-0.984375	-1.11112
1_UPTAGDot1OE	1	DOT1OE_Plate1	DOT1OE	UPTAGDot1OE	3.87003	-1.6866	2.15597	0.156307
2_UPTAG0001	2	YOL043C	NTG2	UPTAG0001	0.270026	-0.00545095	0.225769	0.0127603
2_UPTAG0002	2	YDR183W	PLP1	UPTAG0002	0.144616	-0.0602864	0.039297	0.164709
2_UPTAG0003	2	YJL218W	YJL218W	UPTAG0003	-0.123944	0.0622064	-0.110702	-0.0402695
2_UPTAG0004	2	YEL052W	AFG1	UPTAG0004	-0.0392165	0.121831	0.0598262	-0.129529
2_UPTAG0005	2	YPL074W	YTA6	UPTAG0005	-0.0537037	0.0398225	-0.0372656	-0.0830313
2_UPTAG0006	2	YDR061W	YDR061W	UPTAG0006	-0.232105	0.116255	-0.433169	-0.0408534
2_UPTAG0007	2	YOL141W	PPM2	UPTAG0007	-0.191124	-0.0742066	-0.299395	0.0248213
2_UPTAG0008	2	YJL084C	ALY2	UPTAG0008	-0.275707	0.0498593	-0.251935	-0.0837046
2_UPTAG0009	2	YGR163W	GTR2	UPTAG0009	0.358491	-0.206896	-0.0875804	0.450988
2_UPTAG0010	2	YLR289W	GUF1	UPTAG0010	0.0779111	0.0378674	0.0862747	0.16367
2_UPTAG0011	2	YDR291W	HRQ1	UPTAG0011	0.0807098	0.150765	0.200568	-0.0760838
2_UPTAG0012	2	YFR038W	IRC5	UPTAG0012	0.0402401	-0.0636896	-0.049365	0.0916776
2_UPTAG0013	2	YLR419W	YLR419W	UPTAG0013	-0.124699	0.0954384	-0.0599147	-0.155278
2_UPTAG0014	2	YLR118C	YLR118C	UPTAG0014	0.070813	-0.0478086	-0.00800203	0.136265
2_UPTAG0015	2	YJR107W	YJR107W	UPTAG0015	-0.481655	0.297648	-0.224178	-0.122549
2_UPTAG0016	2	YFL061W	DDI2	UPTAG0016	-0.479937	-0.00741543	-0.51887	-0.0181104
2_UPTAG0017	2	YPL189W	GUP2	UPTAG0017	-0.577712	0.0474305	-0.567791	0.114752
2_UPTAG0018	2	YJR138W	IML1	UPTAG0018	-0.191767	0.129937	-0.0865047	-0.243551
2_UPTAG0019	2	YPL024W	RMI1	UPTAG0019	0.619686	-0.218034	0.386318	0.125344
2_UPTAG0020	2	YDR383C	NKP1	UPTAG0020	-0.308246	-0.00323225	-0.350985	0.0603622
2_UPTAG0021	2	YLR315W	NKP2	UPTAG0021	-0.102098	-0.0647815	-0.203472	0.114099
2_UPTAG0022	2	YBR233W	PBP2	UPTAG0022	0.109794	-0.146613	-0.0653089	0.189349
2_UPTAG0023	2	YFR023W	PES4	UPTAG0023	-0.362721	-0.0107437	-0.39442	-0.0853816
2_UPTAG0024	2	YOR104W	PIN2	UPTAG0024	-0.440411	0.189244	-0.282161	0.0256832
2_UPTAG0025	2	YDR505C	PSP1	UPTAG0025	-0.151073	-0.159667	-0.340926	0.191301
2_UPTAG0026	2	YNL201C	PSY2	UPTAG0026	-0.0331285	-0.181459	-0.234043	0.0761497
2_UPTAG0027	2	YDL001W	RMD1	UPTAG0027	0.612532	-1.79472	-1.16575	0.398161
2_UPTAG0028	2	YHL023C	NPR3	UPTAG0028	0.189474	-0.119587	0.0545071	-0.170757
2_UPTAG0029	2	YEL072W	RMD6	UPTAG0029	-0.230295	0.0192266	-0.248709	0.0857623
2_UPTAG0030	2	YFR048W	RMD8	UPTAG0030	-0.236806	0.00402833	-0.260454	0.248213
2_UPTAG0031	2	YMR266W	RSN1	UPTAG0031	-0.388545	0.158774	-0.257801	0.104585
2_UPTAG0032	2	YGL056C	SDS23	UPTAG0032	-0.177854	0.0212861	-0.187794	-0.0340053
2_UPTAG0033	2	YBL031W	SHE1	UPTAG0033	0.0805461	-0.118181	-0.0746923	0.0725465
2_UPTAG0034	2	YGL228W	SHE10	UPTAG0034	0.0155351	0.228837	0.20171	-0.0873013
2_UPTAG0035	2	YLR187W	SKG3	UPTAG0035	0.11367	0.188633	0.275777	-0.206928
2_UPTAG0036	2	YIL011W	TIR3	UPTAG0036	0.0446982	-0.132241	-0.115696	0.0684794
2_UPTAG0037	2	YEL038W	UTR4	UPTAG0037	-0.0886301	0.153404	0.0363994	-0.0706916
2_UPTAG0038	2	YNL212W	VID27	UPTAG0038	0.152261	-0.0764427	0.0514453	0.214033
2_UPTAG0039	2	YPL239W	YAR1	UPTAG0039	0.0889558	-0.0350436	0.0287094	-0.147764
2_UPTAG0040	2	YGL060W	YBP2	UPTAG0040	0.0535673	0.0070298	0.0321278	-0.0197494
2_UPTAG0041	2	YBR094W	PBY1	UPTAG0041	-0.022835	0.115788	0.0662861	-0.0984712
2_UPTAG0042	2	YBR108W	AIM3	UPTAG0042	-0.12742	0.161835	0.00487336	-0.057796
2_UPTAG0045	2	YBR284W	YBR284W	UPTAG0045	-0.0872661	0.146668	0.0307087	-0.255894
2_UPTAG0046	2	YDL114W	YDL114W	UPTAG0046	-0.0543702	0.135048	0.0412914	-0.223834
2_UPTAG0047	2	YDR249C	YDR249C	UPTAG0047	-0.15515	-0.00658172	-0.200946	-0.0334324
2_UPTAG0049	2	YEL041W	YEF1	UPTAG0049	-0.168747	-0.0338864	-0.235204	0.138991
2_UPTAG0050	2	YER066W	RRT13	UPTAG0050	0.0279736	-0.107159	-0.115357	0.0266917
2_UPTAG0051	2	YGL242C	YGL242C	UPTAG0051	-0.160641	-0.0679431	-0.262372	0.0753817
2_UPTAG0052	2	YGR126W	YGR126W	UPTAG0052	0.0725365	-0.0841415	-0.0390455	-0.0509218
2_UPTAG0054	2	YJL149W	DAS1	UPTAG0054	-0.0351922	-0.0139357	-0.0716222	0.041983
2_UPTAG0055	2	YJR142W	YJR142W	UPTAG0055	-0.289286	0.0981328	-0.219632	-0.0244092
2_UPTAG0056	2	YKL056C	TMA19	UPTAG0056	-0.407217	0.132705	-0.303527	0.0267246
2_UPTAG0057	2	YKL151C	YKL151C	UPTAG0057	0.000573963	0.0426095	0.0154165	0.0900334
2_UPTAG0058	2	YLL007C	LMO1	UPTAG0058	-0.159604	0.0305106	-0.173467	0.0823396
2_UPTAG0059	2	YLL049W	LDB18	UPTAG0059	0.101363	-0.0205859	0.0533963	0.109646
2_UPTAG0060	2	YLR179C	YLR179C	UPTAG0060	0.884807	-2.22722	-1.32597	0.142754
2_UPTAG0061	2	YLR218C	COA4	UPTAG0061	0.429797	-0.0897922	0.311682	-0.0870175
2_UPTAG0062	2	YLR254C	NDL1	UPTAG0062	0.15896	-0.0300417	0.107759	-0.112167
2_UPTAG0063	2	YLR352W	YLR352W	UPTAG0063	0.368743	0.0554206	-0.300973	0.057585
2_UPTAG0064	2	YMR262W	YMR262W	UPTAG0064	0.0824375	0.0701792	0.12928	-0.103011
2_UPTAG0065	2	YOL111C	MDY2	UPTAG0065	0.0435575	-0.0715805	-0.050049	-0.0226337
2_UPTAG0066	2	YOL161C	PAU20	UPTAG0066	-0.355783	0.0858451	-0.301454	0.0356301
2_UPTAG0067	2	YOR296W	YOR296W	UPTAG0067	-0.289088	0.0552299	-0.260757	0.0268985
2_UPTAG0068	2	YOR322C	LDB19	UPTAG0068	0.294252	-0.295159	-0.0316181	0.16417
2_UPTAG0069	2	YOR378W	AMF1	UPTAG0069	0.0273166	-0.0993579	-0.0984984	-0.157734
2_UPTAG0070	2	YPL066W	RGL1	UPTAG0070	-0.234389	0.0794429	-0.198247	0.100714
2_UPTAG0071	2	YPL144W	POC4	UPTAG0071	-0.211804	-0.222461	-0.468618	0.266841
2_UPTAG0075	2	YPR106W	ISR1	UPTAG0075	0.556269	-0.361699	0.181191	-0.334572
2_UPTAG0077	2	YBR125C	PTC4	UPTAG0077	-0.15182	-0.0760217	-0.24616	0.0370003
2_UPTAG0078	2	YGR203W	YCH1	UPTAG0078	0.0096539	-0.0545944	-0.0772791	-0.0560548
2_UPTAG0079	2	YPL176C	TRE1	UPTAG0079	-0.178956	-0.133663	-0.36544	0.0499757
2_UPTAG0080	2	YJR129C	EFM3	UPTAG0080	0.237541	-0.249979	-0.0428937	-0.468962
2_UPTAG0081	2	YPL017C	IRC15	UPTAG0081	-0.193529	-0.106963	-0.329008	0.154017
2_UPTAG0082	2	YDR501W	PLM2	UPTAG0082	0.0735184	-0.0527611	0.00109053	-0.261584
2_UPTAG0083	2	YLR183C	TOS4	UPTAG0083	-0.155204	0.0270554	-0.15878	0.114544
2_UPTAG0084	2	YGL096W	TOS8	UPTAG0084	0.0886642	0.218891	0.28025	0.0313128
2_UPTAG0085	2	YNR048W	YNR048W	UPTAG0085	-0.133373	-0.106436	-0.263755	0.0489769
2_UPTAG0086	2	YJL197W	UBP12	UPTAG0086	0.189153	-0.306545	-0.186762	0.169654
2_UPTAG0087	2	YBL067C	UBP13	UPTAG0087	-0.294605	-0.106873	-0.492806	0.206533
2_UPTAG0088	2	YAL020C	ATS1	UPTAG0088	0.221104	-0.1844	0.00820071	0.0533729
2_UPTAG0089	2	YKR048C	NAP1	UPTAG0089	0.0617921	0.0181831	0.060178	-0.191713
2_UPTAG0090	2	YKL110C	KTI12	UPTAG0090	0.626698	-0.0173895	0.593148	0.000226877
2_UPTAG0092	2	YNL289W	PCL1	UPTAG0092	-0.075159	-0.0968538	-0.193461	-0.176063
2_UPTAG0093	2	YDL127W	PCL2	UPTAG0093	-0.0739634	0.048572	-0.0586489	-0.0133782
2_UPTAG0094	2	YHR071W	PCL5	UPTAG0094	0.309506	0.132712	0.417742	-0.213209
2_UPTAG0095	2	YDL179W	PCL9	UPTAG0095	-0.339062	0.119368	-0.290512	0.109415
2_UPTAG0097	2	YMR052W	FAR3	UPTAG0097	0.121362	-0.0312162	0.0589952	-0.0322568
2_UPTAG0098	2	YPR075C	OPY2	UPTAG0098	0.0642157	0.0179896	0.0397386	-0.114051
2_UPTAG0099	2	YKL160W	ELF1	UPTAG0099	0.23986	0.187788	0.371333	-0.144085
2_UPTAG0100	2	YPL089C	RLM1	UPTAG0100	-0.35351	0.0773608	-0.304352	0.0850641
2_UPTAG0102	2	YKL129C	MYO3	UPTAG0102	-0.470102	0.287069	-0.211833	-0.025332
2_UPTAG0103	2	YMR109W	MYO5	UPTAG0103	-0.390921	0.0569025	-0.354344	0.0862574
2_UPTAG0104	2	YPR030W	CSR2	UPTAG0104	0.0234544	-0.0439123	-0.0501487	-0.106395
2_UPTAG0105	2	YMR234W	RNH1	UPTAG0105	0.042957	0.214474	0.218655	-0.00179459
2_UPTAG0106	2	YJL042W	MHP1	UPTAG0106	-0.105262	-0.0356453	-0.166018	-0.0261347
2_UPTAG0107	2	YOR191W	ULS1	UPTAG0107	-0.264056	0.128612	-0.162466	-0.281912
2_UPTAG0108	2	YMR284W	YKU70	UPTAG0108	0.6014	-0.0673173	0.488178	-0.016333
2_UPTAG0109	2	YMR106C	YKU80	UPTAG0109	0.167595	-0.0193319	0.129639	-0.00186868
2_UPTAG0111	2	YNL097C	PHO23	UPTAG0111	0.895545	-0.250025	0.605575	-0.0421475
2_UPTAG0112	2	YBR245C	ISW1	UPTAG0112	-0.239014	0.16884	-0.093478	-0.163103
2_UPTAG0113	2	YGR056W	RSC1	UPTAG0113	-0.161633	0.0495978	-0.133545	0.0338355
2_UPTAG0114	2	YFR013W	IOC3	UPTAG0114	-0.0750639	0.0621885	-0.0447406	0.0995421
2_UPTAG0115	2	YOR304W	ISW2	UPTAG0115	-0.343377	0.112234	-0.259638	0.0923595
2_UPTAG0116	2	YGL163C	RAD54	UPTAG0116	0.944835	-0.131581	0.788598	0.0897509
2_UPTAG0118	2	YOL017W	ESC8	UPTAG0118	-0.126651	0.10882	-0.0466999	-0.111419
2_UPTAG0119	2	YDR181C	SAS4	UPTAG0119	-0.382974	-0.0411002	-0.451714	-0.116302
2_UPTAG0120	2	YOR213C	SAS5	UPTAG0120	0.0785762	-0.157145	-0.0997845	-0.282968
2_UPTAG0121	2	YJL065C	DLS1	UPTAG0121	-0.297559	0.024157	-0.303568	0.144829
2_UPTAG0122	2	YMR219W	ESC1	UPTAG0122	0.023418	0.0421538	0.0207278	-0.0204422
2_UPTAG0123	2	YLR015W	BRE2	UPTAG0123	0.169979	-0.0233315	0.111216	-0.159213
2_UPTAG0124	2	YDR469W	SDC1	UPTAG0124	0.217592	-0.114998	0.0715171	-0.100066
2_UPTAG0125	2	YBR175W	SWD3	UPTAG0125	0.517425	-0.0280066	0.457355	-0.0992073
2_UPTAG0126	2	YLR288C	MEC3	UPTAG0126	-0.0367115	0.0155127	-0.0450125	-0.125686
2_UPTAG0127	2	YBR278W	DPB3	UPTAG0127	0.0151589	0.178616	0.164542	-0.0659013
2_UPTAG0128	2	YDR121W	DPB4	UPTAG0128	-0.536101	-0.013418	-0.576895	0.0596712
2_UPTAG0129	2	YPL001W	HAT1	UPTAG0129	0.15636	-0.00987216	0.117721	-0.0569058
2_UPTAG0131	2	YHR119W	SET1	UPTAG0131	0.263818	-0.0426812	0.191234	-0.0335624
2_UPTAG0132	2	YCL061C	MRC1	UPTAG0132	0.591747	-0.0711763	0.482269	0.0323836
2_UPTAG0133	2	YGL037C	PNC1	UPTAG0133	0.0848004	-0.056705	0.000298493	-0.087353
2_UPTAG0134	2	YOR209C	NPT1	UPTAG0134	0.814544	-0.31884	0.476907	-0.0773085
2_UPTAG0135	2	YDR440W	DOT1	UPTAG0135	1.03209	-3.47258	-2.45764	0.040679
2_UPTAG0136	2	YPL138C	SPP1	UPTAG0136	-0.073165	0.278267	0.165192	-0.0683027
2_UPTAG0137	2	YAL019W	FUN30	UPTAG0137	-0.133453	0.00438033	-0.162752	0.0287937
2_UPTAG0138	2	YDR254W	CHL4	UPTAG0138	-0.0380436	0.100433	0.0268276	-0.0475742
2_UPTAG0140	2	YBR107C	IML3	UPTAG0140	0.0415395	0.0887497	0.0893851	0.0732699
2_UPTAG0141	2	YGR089W	NNF2	UPTAG0141	-0.0362917	0.0116511	-0.0570915	0.133978
2_UPTAG0142	2	YLR381W	CTF3	UPTAG0142	-0.0332197	0.194626	0.128316	0.031631
2_UPTAG0143	2	YPR046W	MCM16	UPTAG0143	-0.043683	0.0491543	-0.0268434	-0.0105778
2_UPTAG0144	2	YDR318W	MCM21	UPTAG0144	0.110132	-0.112158	-0.0499843	0.0795267
2_UPTAG0146	2	YAR018C	KIN3	UPTAG0146	-0.0267288	0.118301	0.0609882	-0.0796357
2_UPTAG0147	2	YPL008W	CHL1	UPTAG0147	0.250345	-0.24539	-0.0246766	0.213934
2_UPTAG0148	2	YCR077C	PAT1	UPTAG0148	0.119577	0.12415	0.216323	-0.183382
2_UPTAG0149	2	YPL018W	CTF19	UPTAG0149	-0.117777	0.0353764	-0.115174	0.0173988
2_UPTAG0151	2	YJR053W	BFA1	UPTAG0151	0.0747414	0.0315288	0.0749345	0.0124504
2_UPTAG0152	2	YDR435C	PPM1	UPTAG0152	0.575287	0.0217821	0.573361	-0.240887
2_UPTAG0153	2	YNL327W	EGT2	UPTAG0153	-0.273497	0.196154	-0.102563	-0.0685452
2_UPTAG0156	2	YBR023C	CHS3	UPTAG0156	-0.0274266	-0.0442042	-0.0978041	0.0671576
2_UPTAG0157	2	YBL061C	SKT5	UPTAG0157	-0.14404	0.0107408	-0.162164	0.057552
2_UPTAG0158	2	YNL166C	BNI5	UPTAG0158	-0.0353738	0.0302195	-0.0508909	0.0186306
2_UPTAG0165	2	YJL115W	ASF1	UPTAG0165	0.941832	-0.484031	0.426449	0.239947
2_UPTAG0166	2	YER142C	MAG1	UPTAG0166	0.00556344	-0.0559419	-0.084422	0.133976
2_UPTAG0167	2	YLR427W	MAG2	UPTAG0167	-0.32764	0.205157	-0.184628	-0.107011
2_UPTAG0168	2	YDL200C	MGT1	UPTAG0168	-0.110676	0.173247	0.0372664	-0.12077
2_UPTAG0169	2	YGR081C	SLX9	UPTAG0169	-0.400938	0.295964	-0.141142	-0.0906262
2_UPTAG0170	2	YER116C	SLX8	UPTAG0170	2.56973	-1.32913	1.25704	0.430697
2_UPTAG0172	2	YOL090W	MSH2	UPTAG0172	-0.183838	-0.0903816	-0.318834	-0.128495
2_UPTAG0173	2	YCR092C	MSH3	UPTAG0173	0.160812	0.186268	0.30343	-0.167853
2_UPTAG0174	2	YML061C	PIF1	UPTAG0174	0.205978	-0.114613	0.0599761	-0.0837627
2_UPTAG0175	2	YJL208C	NUC1	UPTAG0175	0.063519	0.0993521	0.129752	-0.237651
2_UPTAG0176	2	YDR110W	FOB1	UPTAG0176	-0.34725	0.387651	0.00481801	-0.176633
2_UPTAG0177	2	YHR120W	MSH1	UPTAG0177	-0.254457	0.0132609	-0.287616	-0.0535044
2_UPTAG0178	2	YLR032W	RAD5	UPTAG0178	0.521557	-0.12725	0.36569	0.0898918
2_UPTAG0179	2	YMR173W	DDR48	UPTAG0179	-0.192481	0.278949	0.0580066	-0.0555732
2_UPTAG0180	2	YJR069C	HAM1	UPTAG0180	-0.310024	0.22163	-0.118516	-0.0379
2_UPTAG0182	2	YDR030C	RAD28	UPTAG0182	-0.184778	0.167543	-0.0450811	0.0445231
2_UPTAG0183	2	YDR263C	DIN7	UPTAG0183	0.0570031	0.13538	0.129884	-0.0799462
2_UPTAG0184	2	YBL019W	APN2	UPTAG0184	0.078169	0.0198813	0.0698268	0.0757275
2_UPTAG0185	2	YMR156C	TPP1	UPTAG0185	-0.277266	0.199957	-0.107832	-0.0816494
2_UPTAG0186	2	YIR002C	MPH1	UPTAG0186	0.115809	-0.00635147	0.0758396	-0.184721
2_UPTAG0187	2	YBR223C	TDP1	UPTAG0187	-0.390075	0.161174	-0.255286	-0.0362259
2_UPTAG0189	2	YML021C	UNG1	UPTAG0189	1.44315	-0.47367	0.93824	-0.292265
2_UPTAG0191	2	YBR228W	SLX1	UPTAG0191	-0.396085	0.0354376	-0.391459	0.118388
2_UPTAG0192	2	YMR137C	PSO2	UPTAG0192	0.267416	0.141511	0.373127	-0.164585
2_UPTAG0193	2	YPR135W	CTF4	UPTAG0193	1.13037	0.00951573	1.10616	0.0274923
2_UPTAG0194	2	YJR144W	MGM101	UPTAG0194	0.126636	-0.0780711	0.0127278	0.328036
2_UPTAG0195	2	YJL092W	SRS2	UPTAG0195	0.0289267	0.309789	0.297212	-0.00764278
2_UPTAG0196	2	YKL114C	APN1	UPTAG0196	0.0588701	0.101667	0.123274	0.00871761
2_UPTAG0197	2	YAL015C	NTG1	UPTAG0197	0.331512	0.221924	0.528189	-0.100819
2_UPTAG0198	2	YOR346W	REV1	UPTAG0198	-0.145335	0.1685	-0.00251348	-0.0116942
2_UPTAG0199	2	YDR386W	MUS81	UPTAG0199	-0.0233019	0.0741567	0.0199767	-0.0409854
2_UPTAG0200	2	YDR419W	RAD30	UPTAG0200	-0.0361404	0.16543	0.0931526	-0.0583446
2_UPTAG0201	2	YHR081W	LRP1	UPTAG0201	-0.217466	0.0659873	-0.175727	-0.051012
2_UPTAG0202	2	YPR164W	MMS1	UPTAG0202	0.96289	-0.534576	0.364906	0.24683
2_UPTAG0203	2	YLR265C	NEJ1	UPTAG0203	0.0322986	0.014046	0.0181389	0.0895776
2_UPTAG0205	2	YGL127C	SOH1	UPTAG0205	0.413176	0.168227	0.541744	0.336241
2_UPTAG0206	2	YDR079C-A	TFB5	UPTAG0206	-0.728135	0.192766	-0.564838	0.0237627
2_UPTAG0207	2	YKL025C	PAN3	UPTAG0207	0.0225952	0.0442622	0.0334302	-0.0607591
2_UPTAG0209	2	YMR224C	MRE11	UPTAG0209	0.837743	-0.282747	0.526497	0.294457
2_UPTAG0210	2	YIL153W	RRD1	UPTAG0210	0.213066	-0.100671	0.0702299	0.238748
2_UPTAG0211	2	YML060W	OGG1	UPTAG0211	-0.0332941	0.314729	0.245874	-0.0775476
2_UPTAG0212	2	YER169W	RPH1	UPTAG0212	0.259623	0.00688762	0.239227	0.0533836
2_UPTAG0214	2	YBR098W	MMS4	UPTAG0214	0.587917	-0.0197785	0.53958	-0.100154
2_UPTAG0215	2	YML102W	CAC2	UPTAG0215	0.437212	-0.0877648	0.319289	-0.21924
2_UPTAG0216	2	YBR195C	MSI1	UPTAG0216	0.301341	0.00599258	0.279053	-0.0288977
2_UPTAG0217	2	YPL167C	REV3	UPTAG0217	-0.175086	0.276413	0.0526895	0.0263134
2_UPTAG0218	2	YIL139C	REV7	UPTAG0218	-0.17978	0.0304288	-0.177839	-0.146104
2_UPTAG0219	2	YHR031C	RRM3	UPTAG0219	0.0267273	-0.204049	-0.205769	0.094581
2_UPTAG0222	2	YDR279W	RNH202	UPTAG0222	0.330016	-0.198552	0.105283	0.00702516
2_UPTAG0223	2	YLR154C	RNH203	UPTAG0223	0.10589	0.14982	0.227302	-0.00417037
2_UPTAG0224	2	YER070W	RNR1	UPTAG0224	2.1803	-0.593783	1.54587	0.158797
2_UPTAG0225	2	YIL066C	RNR3	UPTAG0225	-0.494714	0.0804116	-0.442122	0.0223772
2_UPTAG0226	2	YGR180C	RNR4	UPTAG0226	0.202801	-0.0520052	0.115913	0.0275706
2_UPTAG0227	2	YNL273W	TOF1	UPTAG0227	0.131677	-0.058359	0.039496	0.0209544
2_UPTAG0228	2	YGR276C	RNH70	UPTAG0228	0.0915387	-0.134996	-0.0785251	0.0344821
2_UPTAG0229	2	YLR135W	SLX4	UPTAG0229	-0.176641	0.175039	-0.0400515	0.119066
2_UPTAG0230	2	YNL218W	MGS1	UPTAG0230	-0.0996407	0.233604	0.103643	-0.127827
2_UPTAG0231	2	YCR086W	CSM1	UPTAG0231	1.75915	-0.864304	0.930423	-0.350512
2_UPTAG0232	2	YOR144C	ELG1	UPTAG0232	0.148507	-0.0401356	0.0734206	0.261472
2_UPTAG0233	2	YKR010C	TOF2	UPTAG0233	0.208156	0.0325115	0.198498	0.0791217
2_UPTAG0234	2	YOR330C	MIP1	UPTAG0234	-0.336005	-0.0015801	-0.362621	0.146122
2_UPTAG0236	2	YLR320W	MMS22	UPTAG0236	2.05486	-0.609672	1.40674	0.0536611
2_UPTAG0237	2	YOR005C	DNL4	UPTAG0237	0.221448	-0.00568759	0.18611	-0.206503
2_UPTAG0239	2	YGL090W	LIF1	UPTAG0239	0.0178722	0.0508875	0.0403904	0.0420113
2_UPTAG0240	2	YCR014C	POL4	UPTAG0240	-0.249839	-0.0319431	-0.309942	-0.00999667
2_UPTAG0243	2	YNL250W	RAD50	UPTAG0243	0.673545	-0.0128532	0.631543	0.279372
2_UPTAG0244	2	YDR369C	XRS2	UPTAG0244	0.708075	0.306222	0.899796	-0.178169
2_UPTAG0245	2	YBR214W	SDS24	UPTAG0245	0.151618	-0.0574485	-0.14096	-0.0770102
2_UPTAG0246	2	YIL135C	VHS2	UPTAG0246	-0.317277	0.0827199	-0.30361	-0.0807088
2_UPTAG0247	2	YFR040W	SAP155	UPTAG0247	0.615203	-0.495193	0.0907301	0.147034
2_UPTAG0248	2	YJL098W	SAP185	UPTAG0248	-0.605282	0.15869	-0.474467	-0.0483742
2_UPTAG0249	2	YKR028W	SAP190	UPTAG0249	-0.392679	0.0087803	-0.414875	0.13233
2_UPTAG0250	2	YGL229C	SAP4	UPTAG0250	-0.471082	-0.0113639	-0.523443	0.0313403
2_UPTAG0252	2	YPR120C	CLB5	UPTAG0252	0.800513	-0.190474	0.575769	-0.118617
2_UPTAG0253	2	YGR109C	CLB6	UPTAG0253	-0.170325	0.0557156	-0.140508	-0.0111015
2_UPTAG0254	2	YAL040C	CLN3	UPTAG0254	0.305919	0.000577291	0.259413	-0.125943
2_UPTAG0255	2	YER167W	BCK2	UPTAG0255	0.018002	0.134992	0.119174	0.0352884
2_UPTAG0256	2	YKR072C	SIS2	UPTAG0256	-0.267861	-0.414679	-0.714405	0.251957
2_UPTAG0257	2	YOR054C	VHS3	UPTAG0257	-0.143165	0.0147575	-0.157035	-0.10858
2_UPTAG0258	2	YLR079W	SIC1	UPTAG0258	0.89512	-0.110993	0.764558	0.313474
2_UPTAG0259	2	YJR059W	PTK2	UPTAG0259	-0.383652	0.0640634	-0.415033	-0.18536
2_UPTAG0260	2	YCR008W	SAT4	UPTAG0260	-0.558545	-0.12151	-0.731181	0.542678
2_UPTAG0261	2	YER089C	PTC2	UPTAG0261	0.0107348	0.116622	0.0123729	-0.366142
2_UPTAG0262	2	YER111C	SWI4	UPTAG0262	1.70982	-0.754036	0.929044	-0.214857
2_UPTAG0265	2	YBR215W	HPC2	UPTAG0265	-0.396974	0.0295875	-0.473712	-0.035811
2_UPTAG0266	2	YLR131C	ACE2	UPTAG0266	-0.346988	0.400812	-0.0353931	0.104893
2_UPTAG0267	2	YDR146C	SWI5	UPTAG0267	0.535127	-0.0422837	0.46928	0.119743
2_UPTAG0268	2	YGR108W	CLB1	UPTAG0268	-0.294717	0.296573	-0.0560623	-0.231244
2_UPTAG0269	2	YPR119W	CLB2	UPTAG0269	-0.316357	0.105959	-0.242676	-0.0155362
2_UPTAG0270	2	YDL155W	CLB3	UPTAG0270	-0.36013	-0.0384384	-0.444678	-0.30336
2_UPTAG0271	2	YLR210W	CLB4	UPTAG0271	-0.0939714	0.113938	-0.0679275	-0.280728
2_UPTAG0272	2	YBL051C	PIN4	UPTAG0272	0.569883	-0.168543	0.329657	0.232058
2_UPTAG0273	2	YJL187C	SWE1	UPTAG0273	-0.113965	0.0009363	-0.140527	0.13265
2_UPTAG0274	2	YMR036C	MIH1	UPTAG0274	0.0482316	0.19601	0.111415	-0.242619
2_UPTAG0276	2	YPR193C	HPA2	UPTAG0276	0.0726891	0.16763	0.153754	-0.382561
2_UPTAG0277	2	YEL066W	HPA3	UPTAG0277	0.0721342	0.165998	0.117424	-0.163192
2_UPTAG0278	2	YGR252W	GCN5	UPTAG0278	2.09163	-0.721252	1.3245	-0.0995269
2_UPTAG0279	2	YOR064C	YNG1	UPTAG0279	0.203708	-0.11749	0.0625819	-0.0186029
2_UPTAG0280	2	YIL112W	HOS4	UPTAG0280	-0.232948	0.105638	-0.164561	0.00752324
2_UPTAG0281	2	YKR029C	SET3	UPTAG0281	0.26707	-0.172396	0.0647959	-0.026023
2_UPTAG0283	2	YBR258C	SHG1	UPTAG0283	-0.323996	0.0476273	-0.316314	0.0412338
2_UPTAG0284	2	YKL017C	HCS1	UPTAG0284	-0.0270164	0.086901	0.0261494	0.0380582
2_UPTAG0285	2	YGR230W	BNS1	UPTAG0285	0.0107166	0.156023	0.135054	0.00557537
2_UPTAG0287	2	YDL115C	IWR1	UPTAG0287	0.605368	-0.000359678	0.576908	-0.260973
2_UPTAG0288	2	YPL130W	SPO19	UPTAG0288	-0.145974	0.0734801	-0.100984	-0.000706145
2_UPTAG0289	2	YIL073C	SPO22	UPTAG0289	0.24731	0.176695	0.394911	-0.0658108
2_UPTAG0290	2	YNL012W	SPO1	UPTAG0290	-0.100443	0.17105	0.0467326	-0.0234824
2_UPTAG0291	2	YBL009W	ALK2	UPTAG0291	-0.39395	0.228984	-0.252767	-0.293356
2_UPTAG0292	2	YJR094C	IME1	UPTAG0292	-0.218198	0.214293	-0.127969	0.0215434
2_UPTAG0293	2	YGR247W	CPD1	UPTAG0293	-0.00428412	0.05653	0.0240956	-0.103685
2_UPTAG0294	2	YPR007C	REC8	UPTAG0294	-0.243638	0.0137729	-0.265292	0.102834
2_UPTAG0295	2	YDR285W	ZIP1	UPTAG0295	-0.0311888	0.0385799	-0.0259013	0.395199
2_UPTAG0296	2	YIL072W	HOP1	UPTAG0296	-0.201514	0.251416	0.016982	-0.106825
2_UPTAG0297	2	YNL082W	PMS1	UPTAG0297	-0.0532776	0.053681	-0.0232121	-0.131392
2_UPTAG0298	2	YGL251C	HFM1	UPTAG0298	0.00905365	-0.23229	-0.234525	0.042599
2_UPTAG0299	2	YNL025C	SSN8	UPTAG0299	0.220682	0.205212	0.331885	0.154263
2_UPTAG0300	2	YMR198W	CIK1	UPTAG0300	0.679864	-0.158615	0.489358	-0.0903634
2_UPTAG0301	2	YPR141C	KAR3	UPTAG0301	0.703777	-0.317218	0.341836	0.185144
2_UPTAG0302	2	YFR046C	CNN1	UPTAG0302	-0.335708	0.0918985	-0.279827	-0.0307544
2_UPTAG0303	2	YPL194W	DDC1	UPTAG0303	-0.013583	0.052819	0.0194496	-0.220632
2_UPTAG0304	2	YDR273W	DON1	UPTAG0304	-0.409194	0.30234	-0.121888	0.0767119
2_UPTAG0305	2	YPL055C	LGE1	UPTAG0305	-3.11696	1.07474	-2.1337	-0.360294
2_UPTAG0306	2	YGL045W	RIM8	UPTAG0306	-0.373137	0.156071	-0.278112	-0.248112
2_UPTAG0307	2	YOR195W	SLK19	UPTAG0307	0.0437526	0.0213132	0.0349696	-0.0729677
2_UPTAG0308	2	YPL033C	SRL4	UPTAG0308	-0.414122	0.315087	-0.139049	-0.22035
2_UPTAG0309	2	YPR078C	YPR078C	UPTAG0309	0.0170309	0.110658	0.0420445	-0.365835
2_UPTAG0310	2	YGL192W	IME4	UPTAG0310	-0.596666	0.211487	-0.465276	-0.136969
2_UPTAG0312	2	YJR066W	TOR1	UPTAG0312	0.183762	-0.0993358	0.0528503	0.032812
2_UPTAG0313	2	YOR178C	GAC1	UPTAG0313	1.08366	-0.78612	0.313985	0.349053
2_UPTAG0315	2	YHL024W	RIM4	UPTAG0315	0.0991195	0.0812944	0.150237	0.0280858
2_UPTAG0316	2	YNL210W	MER1	UPTAG0316	-0.243505	0.315521	0.0312578	-0.065126
2_UPTAG0317	2	YER179W	DMC1	UPTAG0317	-0.125595	-0.0478084	-0.192296	-0.0328177
2_UPTAG0318	2	YGR044C	RME1	UPTAG0318	-0.130228	0.224604	0.0674657	-0.0273343
2_UPTAG0319	2	YOL091W	SPO21	UPTAG0319	-0.154857	0.286768	0.0854843	-0.0183774
2_UPTAG0320	2	YHR124W	NDT80	UPTAG0320	-0.104818	-0.0590716	-0.1959	0.0483207
2_UPTAG0321	2	YCL055W	KAR4	UPTAG0321	-0.164246	0.0777241	-0.127044	-0.0681363
2_UPTAG0322	2	YIL132C	CSM2	UPTAG0322	-0.16899	0.0504876	-0.14674	0.0509238
2_UPTAG0324	2	YER106W	MAM1	UPTAG0324	0.327796	-0.080689	0.0863765	-0.0587443
2_UPTAG0325	2	YMR048W	CSM3	UPTAG0325	0.10286	0.118958	0.193737	0.0790939
2_UPTAG0326	2	YHL022C	SPO11	UPTAG0326	-0.534351	-0.0744587	-0.638487	0.280346
2_UPTAG0327	2	YGL175C	SAE2	UPTAG0327	0.0816307	-0.0421829	0.0097122	0.0125297
2_UPTAG0328	2	YDR076W	RAD55	UPTAG0328	0.87794	-0.0586379	0.780054	0.151456
2_UPTAG0329	2	YFL003C	MSH4	UPTAG0329	-0.146396	-0.018552	-0.198955	0.158523
2_UPTAG0331	2	YML128C	MSC1	UPTAG0331	0.474567	-0.147138	0.271759	0.0788168
2_UPTAG0332	2	YLR219W	MSC3	UPTAG0332	0.0700905	0.114114	0.154182	-0.00603116
2_UPTAG0334	2	YHR039C	MSC7	UPTAG0334	0.0418902	0.289478	0.287467	0.0616264
2_UPTAG0336	2	YJR021C	REC107	UPTAG0336	0.0785303	0.100277	0.145449	-0.0277551
2_UPTAG0337	2	YGL183C	MND1	UPTAG0337	-0.00378209	-1.2319	-1.25779	0.0104226
2_UPTAG0338	2	YER173W	RAD24	UPTAG0338	1.28648	-0.319758	0.941248	-0.477313
2_UPTAG0340	2	YBR073W	RDH54	UPTAG0340	-0.0497871	0.0479065	-0.0340321	0.145766
2_UPTAG0341	2	YOR368W	RAD17	UPTAG0341	-0.0219579	0.395158	0.0188046	0.0729988
2_UPTAG0342	2	YPL121C	MEI5	UPTAG0342	0.484799	0.100026	0.518892	-0.450843
2_UPTAG0343	2	YPL164C	MLH3	UPTAG0343	0.0755071	0.311857	0.384526	-0.195977
2_UPTAG0344	2	YIR025W	MND2	UPTAG0344	0.349441	-0.00596608	0.314767	-0.0905637
2_UPTAG0345	2	YHR157W	REC104	UPTAG0345	-0.155093	0.0996755	-0.0859087	-0.0950621
2_UPTAG0346	2	YMR133W	REC114	UPTAG0346	-0.103091	0.055571	-0.0890902	-0.0572637
2_UPTAG0347	2	YHR079C-A	SAE3	UPTAG0347	-0.163157	0.164392	-0.0270776	-0.138736
2_UPTAG0349	2	YLR329W	REC102	UPTAG0349	-0.0518987	0.196557	0.116114	0.0062926
2_UPTAG0350	2	YHL029C	OCA5	UPTAG0350	-0.0965289	-0.0207193	-0.142493	-0.202882
2_UPTAG0351	2	YJR108W	ABM1	UPTAG0351	-0.160608	0.20932	0.00505663	0.0514521
2_UPTAG0352	2	YIL123W	SIM1	UPTAG0352	-0.207517	0.0713279	-0.202989	0.00168559
2_UPTAG0353	2	YOR265W	RBL2	UPTAG0353	-0.0761092	0.0536268	-0.0525869	-0.146788
2_UPTAG0355	2	YER016W	BIM1	UPTAG0355	0.267221	-0.132939	0.105545	0.184164
2_UPTAG0357	2	YMR138W	CIN4	UPTAG0357	-0.164324	0.381662	0.181517	-0.120274
2_UPTAG0358	2	YPL253C	VIK1	UPTAG0358	-0.224323	0.173273	-0.0833074	-0.012898
2_UPTAG0359	2	YPL241C	CIN2	UPTAG0359	0.237685	-0.605048	-0.454969	-0.0286241
2_UPTAG0360	2	YDR424C	DYN2	UPTAG0360	0.0679933	-0.04602	-0.0165148	-0.124634
2_UPTAG0361	2	YOR033C	EXO1	UPTAG0361	0.979775	-1.36032	-0.364105	0.191536
2_UPTAG0362	2	YDR097C	MSH6	UPTAG0362	-0.30022	0.184754	-0.14193	-0.169248
2_UPTAG0363	2	YBR272C	HSM3	UPTAG0363	0.180304	-0.14718	0.0115389	0.0161926
2_UPTAG0364	2	YGR144W	THI4	UPTAG0364	0.44275	-0.209214	0.193106	-0.05079
2_UPTAG0365	2	YLR190W	MMR1	UPTAG0365	-0.150242	0.166959	-0.0105068	0.133566
2_UPTAG0366	2	YMR072W	ABF2	UPTAG0366	-0.119554	-0.203476	-0.346908	0.119794
2_UPTAG0367	2	YNL213C	RRG9	UPTAG0367	-0.101744	-0.0274966	-0.160197	0.0364101
2_UPTAG0368	2	YML058W	SML1	UPTAG0368	-0.273737	-0.0385983	-0.339155	0.039857
2_UPTAG0371	2	YGL021W	ALK1	UPTAG0371	-0.285658	-0.0167558	-0.341085	0.0422875
2_UPTAG0373	2	YHR129C	ARP1	UPTAG0373	0.103	-0.0791078	-0.0150282	0.200776
2_UPTAG0374	2	YMR294W	JNM1	UPTAG0374	0.00679782	0.286784	0.259241	0.0324264
2_UPTAG0375	2	YMR078C	CTF18	UPTAG0375	0.734402	-0.0551087	0.647887	0.0607141
2_UPTAG0376	2	YHR191C	CTF8	UPTAG0376	1.13601	-0.294058	0.830095	0.160201
2_UPTAG0377	2	YCL016C	DCC1	UPTAG0377	0.186684	-0.00751285	0.131402	0.0517738
2_UPTAG0378	2	YOL115W	PAP2	UPTAG0378	0.474331	-0.347834	0.0483837	0.232349
2_UPTAG0379	2	YML034W	SRC1	UPTAG0379	0.0494573	-0.0447233	-0.0176653	0.162751
2_UPTAG0380	2	YMR190C	SGS1	UPTAG0380	0.886767	-0.224502	0.635959	0.076869
2_UPTAG0381	2	YLR226W	BUR2	UPTAG0381	-0.128205	-0.0638338	-0.199014	0.167799
2_UPTAG0382	2	YEL061C	CIN8	UPTAG0382	1.04625	-0.0691771	0.921947	0.0806753
2_UPTAG0383	2	YOR073W	SGO1	UPTAG0383	0.838798	-0.23791	0.571808	0.284921
2_UPTAG0385	2	YAL047C	SPC72	UPTAG0385	0.824802	-0.0902528	0.701545	-0.00334476
2_UPTAG0386	2	YML124C	TUB3	UPTAG0386	-0.259684	0.249291	-0.042945	0.00591694
2_UPTAG0387	2	YMR055C	BUB2	UPTAG0387	-0.0603437	-0.022904	-0.107158	-0.10147
2_UPTAG0389	2	YDR517W	GRH1	UPTAG0389	-0.0191642	-0.0598845	-0.105979	-0.0329802
2_UPTAG0390	2	YNL164C	IBD2	UPTAG0390	0.00808825	0.220542	0.165256	-0.022058
2_UPTAG0392	2	YJL013C	MAD3	UPTAG0392	0.119818	0.113472	0.204803	-0.0543823
2_UPTAG0394	2	YNL116W	DMA2	UPTAG0394	-0.144358	0.0967432	-0.0758384	0.000751313
2_UPTAG0395	2	YGL086W	MAD1	UPTAG0395	0.320791	-0.125618	0.21958	0.352877
2_UPTAG0397	2	YCL029C	BIK1	UPTAG0397	0.0648408	-0.116117	-0.0792547	-0.0164788
2_UPTAG0398	2	YGL216W	KIP3	UPTAG0398	-0.108188	0.0394024	-0.0997995	0.100706
2_UPTAG0399	2	YJR091C	JSN1	UPTAG0399	0.513089	-0.0281504	0.458759	-0.214994
2_UPTAG0400	2	YIL040W	APQ12	UPTAG0400	0.220957	-0.204482	-0.0217816	0.165412
2_UPTAG0401	2	YDR139C	RUB1	UPTAG0401	0.102262	-0.145817	-0.0757061	-0.0616955
2_UPTAG0402	2	YDR289C	RTT103	UPTAG0402	0.430349	0.0254634	0.42745	-0.0848742
2_UPTAG0404	2	YHR154W	RTT107	UPTAG0404	0.444862	0.0817891	0.504744	0.0775591
2_UPTAG0405	2	YLL002W	RTT109	UPTAG0405	2.18092	-0.609949	1.53774	-0.433844
2_UPTAG0406	2	YBR158W	AMN1	UPTAG0406	-0.184719	0.2385	0.0220329	0.00671048
2_UPTAG0407	2	YDR255C	RMD5	UPTAG0407	0.318342	0.0372778	0.330415	-0.0824321
2_UPTAG0409	2	YGL197W	MDS3	UPTAG0409	0.198758	-0.119724	0.026371	0.256508
2_UPTAG0411	2	YDR451C	YHP1	UPTAG0411	-0.216088	-0.0544478	-0.304125	0.137389
2_UPTAG0412	2	YML027W	YOX1	UPTAG0412	-0.39449	0.0131219	-0.418191	0.129444
2_UPTAG0413	2	YPL269W	KAR9	UPTAG0413	0.181553	0.0257619	0.169154	-0.116512
2_UPTAG0414	2	YOR269W	PAC1	UPTAG0414	0.52009	-0.329217	0.15119	0.171465
2_UPTAG0415	2	YMR299C	DYN3	UPTAG0415	0.171519	-0.120826	0.0288104	0.0801105
2_UPTAG0416	2	YPL155C	KIP2	UPTAG0416	0.217558	-0.0767042	0.116035	-0.123468
2_UPTAG0417	2	YDR488C	PAC11	UPTAG0417	0.287729	-0.388514	-0.114686	-0.0391814
2_UPTAG0418	2	YDR150W	NUM1	UPTAG0418	-0.16223	0.134617	-0.0606336	0.0639271
2_UPTAG0419	2	YHR086W	NAM8	UPTAG0419	-0.258035	0.145505	-0.176444	0.259688
2_UPTAG0420	2	YGR129W	SYF2	UPTAG0420	-0.0161316	-0.0653575	-0.110478	0.0197715
2_UPTAG0422	2	YOR247W	SRL1	UPTAG0422	0.0279065	0.133955	0.133086	0.0532488
2_UPTAG0423	2	YLR082C	SRL2	UPTAG0423	-0.121969	0.0287012	-0.122324	0.26034
2_UPTAG0424	2	YKR091W	SRL3	UPTAG0424	-0.578728	0.0328361	-0.579235	0.0418722
2_UPTAG0426	2	YJR035W	RAD26	UPTAG0426	0.645829	-0.182886	0.324605	-0.226416
2_UPTAG0427	2	YMR201C	RAD14	UPTAG0427	0.452263	-0.282909	0.149147	0.53474
2_UPTAG0429	2	YJR052W	RAD7	UPTAG0429	0.222421	-0.0658037	0.120852	0.24728
2_UPTAG0431	2	YEL037C	RAD23	UPTAG0431	0.31667	0.546766	0.276133	0.0460828
2_UPTAG0433	2	YGR170W	PSD2	UPTAG0433	0.0944069	0.1676	0.198972	-0.0259003
2_UPTAG0435	2	YHR014W	SPO13	UPTAG0435	-0.0251432	-0.0618048	-0.144125	0.00207948
2_UPTAG0436	2	YER007W	PAC2	UPTAG0436	0.324015	-0.11413	0.18692	0.0529001
2_UPTAG0437	2	YOR349W	CIN1	UPTAG0437	-0.22603	-0.0977356	-0.355072	0.141333
2_UPTAG0439	2	YBR057C	MUM2	UPTAG0439	-0.201176	-0.000287148	-0.234631	0.00753074
2_UPTAG0440	2	YGR161C	RTS3	UPTAG0440	0.300399	-0.129375	0.142498	0.237731
2_UPTAG0441	2	YDR481C	PHO8	UPTAG0441	-0.0219787	0.060273	0.0111164	0.21676
2_UPTAG0442	2	YDL236W	PHO13	UPTAG0442	0.253739	0.0568335	0.281008	-0.0279992
2_UPTAG0444	2	YER123W	YCK3	UPTAG0444	0.432003	-0.169978	0.210261	-0.0778407
2_UPTAG0445	2	YJL141C	YAK1	UPTAG0445	0.0125096	0.150143	0.13119	0.0222937
2_UPTAG0446	2	YMR104C	YPK2	UPTAG0446	0.372913	-0.245437	0.0913978	0.253422
2_UPTAG0447	2	YGR188C	BUB1	UPTAG0447	0.144511	0.0167119	0.135137	0.152882
2_UPTAG0448	2	YBR156C	SLI15	UPTAG0448	0.466941	-0.367583	0.0706572	0.157158
2_UPTAG0451	2	YDR507C	GIN4	UPTAG0451	0.426865	-0.247859	0.171296	0.0820883
2_UPTAG0452	2	YKL101W	HSL1	UPTAG0452	0.212068	-0.206897	-0.0175899	0.0689152
2_UPTAG0453	2	YJL106W	IME2	UPTAG0453	-0.432952	0.000317484	-0.454547	0.0959372
2_UPTAG0454	2	YCL024W	KCC4	UPTAG0454	0.140436	0.0715579	0.164108	-0.107567
2_UPTAG0455	2	YCR091W	KIN82	UPTAG0455	0.32783	0.0866697	0.374056	-0.221286
2_UPTAG0456	2	YER129W	SAK1	UPTAG0456	0.145426	-0.147786	-0.0284836	-0.0263661
2_UPTAG0457	2	YFL033C	RIM15	UPTAG0457	-0.144616	0.0409303	-0.137246	0.2198
2_UPTAG0458	2	YDR247W	VHS1	UPTAG0458	0.165925	0.0626129	0.191726	-0.1696
2_UPTAG0459	2	YIL035C	CKA1	UPTAG0459	-0.152534	0.149497	-0.0461212	0.0538223
2_UPTAG0461	2	YGL019W	CKB1	UPTAG0461	-0.0313188	-0.0686751	-0.131443	0.198376
2_UPTAG0462	2	YOR039W	CKB2	UPTAG0462	-0.00664357	-0.100358	-0.135531	0.238149
2_UPTAG0463	2	YGR092W	DBF2	UPTAG0463	0.52176	-0.151612	0.322846	-0.0269822
2_UPTAG0464	2	YPR111W	DBF20	UPTAG0464	-0.255589	-0.16395	-0.457509	0.185049
2_UPTAG0465	2	YKL048C	ELM1	UPTAG0465	0.177283	0.0670666	0.163744	-0.112706
2_UPTAG0466	2	YOR351C	MEK1	UPTAG0466	-0.0218137	-0.0339694	-0.0841549	0.010112
2_UPTAG0467	2	YIL095W	PRK1	UPTAG0467	-0.109917	0.0764515	-0.0522306	-0.132952
2_UPTAG0468	2	YGL158W	RCK1	UPTAG0468	0.0644348	-0.138154	-0.10499	-0.107098
2_UPTAG0469	2	YLR248W	RCK2	UPTAG0469	-0.431418	0.0436326	-0.419191	0.0599323
2_UPTAG0470	2	YGL190C	CDC55	UPTAG0470	-0.0996407	0.0264703	-0.101102	0.156607
2_UPTAG0471	2	YDL134C	PPH21	UPTAG0471	0.290972	0.0491462	0.291807	-0.0686215
2_UPTAG0472	2	YDL188C	PPH22	UPTAG0472	0.0798747	0.101377	0.164597	-0.0777654
2_UPTAG0473	2	YOR014W	RTS1	UPTAG0473	0.936335	-0.313966	0.587252	0.0320118
2_UPTAG0474	2	YGR270W	YTA7	UPTAG0474	-0.344055	0.206052	-0.183103	0.0429918
2_UPTAG0475	2	YMR304W	UBP15	UPTAG0475	-0.237489	0.0996261	-0.164974	-0.042494
2_UPTAG0476	2	YER144C	UBP5	UPTAG0476	-0.324974	-0.0511846	-0.402286	0.281256
2_UPTAG0478	2	YOR027W	STI1	UPTAG0478	-0.11457	0.0430652	-0.107905	0.0604096
2_UPTAG0481	2	YHR111W	UBA4	UPTAG0481	-0.23078	0.09703	-0.161588	0.137698
2_UPTAG0482	2	YLR306W	UBC12	UPTAG0482	0.0593365	0.0216908	0.0468399	-0.0190862
2_UPTAG0483	2	YDR092W	UBC13	UPTAG0483	0.0253493	0.150652	0.147381	0.0488599
2_UPTAG0484	2	YEL012W	UBC8	UPTAG0484	-0.0976684	0.227847	0.101641	-0.0245446
2_UPTAG0485	2	YGR184C	UBR1	UPTAG0485	0.864346	-0.202626	0.637854	-0.554931
2_UPTAG0486	2	YPR066W	UBA3	UPTAG0486	0.375483	-0.0103305	0.33691	-0.197529
2_UPTAG0487	2	YPL003W	ULA1	UPTAG0487	-0.264489	-0.14988	-0.444666	0.00847168
2_UPTAG0488	2	YMR154C	RIM13	UPTAG0488	-0.241615	-0.135486	-0.405472	0.0543026
2_UPTAG0489	2	YHR134W	WSS1	UPTAG0489	-0.100101	-0.0804907	-0.212084	0.165176
2_UPTAG0490	2	YDR409W	SIZ1	UPTAG0490	-0.0484379	0.0123434	-0.0614698	-0.302913
2_UPTAG0491	2	YOR156C	NFI1	UPTAG0491	-0.0528371	-0.0196018	-0.0883813	-0.0866669
2_UPTAG0493	2	YDR144C	MKC7	UPTAG0493	-0.121454	-0.111172	-0.265724	0.0883107
2_UPTAG0494	2	YKL185W	ASH1	UPTAG0494	-0.259898	-0.0294295	-0.332455	-0.225048
2_UPTAG0495	2	YIL131C	FKH1	UPTAG0495	-0.41617	0.0294025	-0.419052	-0.0280866
2_UPTAG0496	2	YNL068C	FKH2	UPTAG0496	-0.0615124	-0.123178	-0.219768	-0.199269
2_UPTAG0497	2	YLL017W	YLL017W	UPTAG0497	-0.0368519	0.0108305	-0.0457213	-0.193369
2_UPTAG0498	2	YOR101W	RAS1	UPTAG0498	0.0363803	-0.137608	-0.132301	-0.151615
2_UPTAG0499	2	YOL110W	SHR5	UPTAG0499	-0.279832	0.136439	-0.222174	-0.141901
2_UPTAG0500	2	YIL122W	POG1	UPTAG0500	0.179704	-0.28168	-0.131226	-0.0447089
2_UPTAG0501	2	YMR100W	MUB1	UPTAG0501	-0.185012	0.0302285	-0.18024	0.00153565
2_UPTAG0502	2	YDL056W	MBP1	UPTAG0502	-0.190197	-0.0121762	-0.229392	0.0145091
2_UPTAG0504	2	YDR363W-A	SEM1	UPTAG0504	-0.501694	-0.0455542	-0.571231	0.198518
2_UPTAG0505	2	YBR133C	HSL7	UPTAG0505	0.042269	-0.0494163	-0.0508997	0.0897876
2_UPTAG0506	2	YBL064C	PRX1	UPTAG0506	-0.265759	-0.112514	-0.432924	-0.050275
2_UPTAG0507	2	YDR453C	TSA2	UPTAG0507	-0.158313	-0.0514448	-0.232713	-0.0802258
2_UPTAG0508	2	YNL197C	WHI3	UPTAG0508	-0.273596	-0.172327	-0.479125	0.114603
2_UPTAG0509	2	YDL224C	WHI4	UPTAG0509	-0.403081	0.128948	-0.298344	-0.0933895
2_UPTAG0510	2	YMR199W	CLN1	UPTAG0510	-0.192734	0.249691	0.0320768	-0.00974529
2_UPTAG0511	2	YDR022C	ATG31	UPTAG0511	-0.173947	0.0997396	-0.11563	-0.00779658
2_UPTAG0512	2	YPL256C	CLN2	UPTAG0512	-0.040095	0.0196078	-0.0489862	-0.155553
2_UPTAG0513	2	YLR003C	CMS1	UPTAG0513	-0.307945	0.20379	-0.132845	-0.179974
2_UPTAG0514	2	YAL024C	LTE1	UPTAG0514	-0.140005	0.00348794	-0.164898	-0.0816776
2_UPTAG0515	2	YHR152W	SPO12	UPTAG0515	-0.241458	0.026766	-0.242671	0.0139007
2_UPTAG0516	2	YBR186W	PCH2	UPTAG0516	-0.0541979	0.353946	0.262367	-0.112388
2_UPTAG0517	2	YPL139C	UME1	UPTAG0517	0.352333	-0.0528295	0.251641	-0.0471234
2_UPTAG0518	2	YOR230W	WTM1	UPTAG0518	-0.0715017	0.0713011	-0.0375037	-0.00236921
2_UPTAG0519	2	YOR229W	WTM2	UPTAG0519	-0.270746	-0.0194959	-0.304187	0.0291232
2_UPTAG0520	2	YNL078W	NIS1	UPTAG0520	-0.215956	0.197558	-0.0460691	-0.231717
2_UPTAG0521	2	YBL008W	HIR1	UPTAG0521	-0.478322	0.162955	-0.346943	-0.0899983
2_UPTAG0522	2	YOR038C	HIR2	UPTAG0522	-0.303217	0.137926	-0.192894	0.051053
2_UPTAG0523	2	YOL012C	HTZ1	UPTAG0523	-0.121824	0.455866	-0.222906	0.563869
2_UPTAG0524	2	YOL006C	TOP1	UPTAG0524	-0.194168	-0.0318036	-0.227482	0.0183826
2_UPTAG0525	2	YPR023C	EAF3	UPTAG0525	-0.174005	0.0578046	-0.143541	-0.100456
2_UPTAG0526	2	YCR094W	CDC50	UPTAG0526	1.23837	-0.135284	1.05934	-0.0818709
2_UPTAG0527	2	YOR113W	AZF1	UPTAG0527	-0.130823	-0.034074	-0.193562	0.00423606
2_UPTAG0528	2	YNL021W	HDA1	UPTAG0528	-0.159452	-0.0107427	-0.207405	-0.13928
2_UPTAG0529	2	YPR068C	HOS1	UPTAG0529	0.206836	-0.0389238	0.143177	-0.0558165
2_UPTAG0530	2	YJL168C	SET2	UPTAG0530	0.0678018	0.0289535	0.0528529	0.097708
2_UPTAG0531	2	YGL194C	HOS2	UPTAG0531	-0.323616	0.178922	-0.181113	0.0644257
2_UPTAG0532	2	YER176W	ECM32	UPTAG0532	0.0407683	0.0198898	0.0365279	-0.059829
2_UPTAG0533	2	YPL022W	RAD1	UPTAG0533	-0.0905058	0.172994	0.0190869	-7.16477e-05
2_UPTAG0534	2	YML095C	RAD10	UPTAG0534	-0.294338	0.0772046	-0.261472	0.137737
2_UPTAG0535	2	YML058W-A	HUG1	UPTAG0535	-0.254801	0.203229	-0.0878183	-0.0213317
2_UPTAG0536	2	YBL088C	TEL1	UPTAG0536	0.748652	-0.4853	0.235678	-0.191186
2_UPTAG0537	2	YER062C	GPP2	UPTAG0537	0.115639	0.243242	-0.0294837	-0.170502
2_UPTAG0538	2	YIL053W	GPP1	UPTAG0538	-0.231575	0.234793	-0.0408993	-0.127553
2_UPTAG0539	2	YHR206W	SKN7	UPTAG0539	0.307212	-0.104153	0.178565	-0.237279
2_UPTAG0540	2	YNL099C	OCA1	UPTAG0540	0.204835	-0.11292	0.0652001	-0.392362
2_UPTAG0541	2	YNR047W	FPK1	UPTAG0541	-0.102667	-0.00192673	-0.132998	-0.27784
2_UPTAG0542	2	YDR014W	RAD61	UPTAG0542	0.048548	0.114157	0.0828538	-0.137642
2_UPTAG0543	2	YIL101C	XBP1	UPTAG0543	-0.257643	0.0384095	-0.230941	-0.0448195
2_UPTAG0544	2	YLL039C	UBI4	UPTAG0544	0.0249548	0.0533992	0.0512226	-0.367738
2_UPTAG0545	2	YOR043W	WHI2	UPTAG0545	-0.153457	0.0461369	-0.133011	0.051509
2_UPTAG0546	2	YPR017C	DSS4	UPTAG0546	0.170852	-0.176694	-0.0396939	-0.203831
2_UPTAG0547	2	YNL299W	TRF5	UPTAG0547	-0.277545	-0.00852256	-0.313007	-0.034059
2_UPTAG0548	2	YML016C	PPZ1	UPTAG0548	-0.580739	0.39054	-0.222252	-0.438567
2_UPTAG0551	2	YOR177C	MPC54	UPTAG0551	0.674523	-0.387351	0.256975	0.00790599
2_UPTAG0552	2	YDR096W	GIS1	UPTAG0552	-0.351356	0.178899	-0.201599	-0.0772771
2_UPTAG0553	2	YER180C	ISC10	UPTAG0553	-0.129355	0.107551	-0.0498017	-0.0853869
2_UPTAG0554	2	YLR227C	ADY4	UPTAG0554	0.192193	-0.0988147	0.0580555	-0.0980098
2_UPTAG0555	2	YDR512C	EMI1	UPTAG0555	-0.246139	-0.152986	-0.419666	0.065438
2_UPTAG0556	2	YGL170C	SPO74	UPTAG0556	-0.255588	-0.152943	-0.45167	-0.061221
2_UPTAG0557	2	YDL013W	SLX5	UPTAG0557	2.43023	-0.974735	1.44053	0.19024
2_UPTAG0558	2	YER044C-A	MEI4	UPTAG0558	-0.36653	0.0501002	-0.395004	0.00570007
2_UPTAG0559	2	YGL033W	HOP2	UPTAG0559	-0.216614	0.00814832	-0.233233	-0.0872439
2_UPTAG0560	2	YOL104C	NDJ1	UPTAG0560	0.0155405	0.137522	0.123812	-0.0401783
2_UPTAG0561	2	YLR263W	RED1	UPTAG0561	-0.335114	0.0659622	-0.293157	0.0349792
2_UPTAG0563	2	YLR394W	CST9	UPTAG0563	1.18545	-0.135958	0.676316	-0.269907
2_UPTAG0564	2	YDR206W	EBS1	UPTAG0564	-0.0837319	0.0616267	-0.0476247	0.0206428
2_UPTAG0565	2	YLR233C	EST1	UPTAG0565	-0.111784	-0.0807443	-0.215821	0.00422501
2_UPTAG0566	2	YIL009C-A	EST3	UPTAG0566	0.394979	-0.0158398	0.327583	-0.0294192
2_UPTAG0567	2	YLR453C	RIF2	UPTAG0567	0.232502	-0.147089	0.0626258	-0.123445
2_UPTAG0568	2	YLR318W	EST2	UPTAG0568	0.54328	-0.0846389	0.425247	0.0238784
2_UPTAG0569	2	YBL032W	HEK2	UPTAG0569	0.0435886	-0.0364777	-0.0593609	0.0382333
2_UPTAG0570	2	YDR545W	YRF1-1	UPTAG0570	-0.198248	-0.0670645	-0.285922	-0.0573042
2_UPTAG0571	2	YER190W	YRF1-2	UPTAG0571	0.00952556	0.0440673	0.0250572	-0.245466
2_UPTAG0573	2	YNL339C	YRF1-6	UPTAG0573	-0.119383	0.0182007	-0.131115	-0.0608122
2_UPTAG0574	2	YDR004W	RAD57	UPTAG0574	1.03608	-0.377557	0.633262	0.241357
2_UPTAG0575	2	YDL059C	RAD59	UPTAG0575	0.210304	-0.143738	0.0401004	-0.0626262
2_UPTAG0576	2	YER095W	RAD51	UPTAG0576	1.00109	-0.1327	0.824336	0.141809
2_UPTAG0577	2	YML032C	RAD52	UPTAG0577	1.06341	-0.34578	0.684114	0.180339
2_UPTAG0579	2	YLR403W	SFP1	UPTAG0579	-0.0153207	0.0805839	0.0304679	0.134065
2_UPTAG0580	2	YNL153C	GIM3	UPTAG0580	0.408475	-0.00277587	0.376391	-0.0874672
2_UPTAG0581	2	YEL003W	GIM4	UPTAG0581	0.533945	-0.245277	0.267593	0.145416
2_UPTAG0582	2	YML094W	GIM5	UPTAG0582	1.26833	-0.483838	0.758563	0.152232
2_UPTAG0583	2	YGR078C	PAC10	UPTAG0583	1.23376	-0.389611	0.79141	0.00541042
2_UPTAG0584	2	YHR200W	RPN10	UPTAG0584	0.951177	-0.430448	0.491917	0.19579
2_UPTAG0586	2	YLR097C	HRT3	UPTAG0586	-0.0427406	-0.0523979	-0.121677	-0.114059
2_UPTAG0589	2	YLR102C	APC9	UPTAG0589	0.83945	-0.367252	0.434776	0.242596
2_UPTAG0590	2	YFR036W	CDC26	UPTAG0590	0.14624	0.000554847	0.117238	0.0565003
2_UPTAG0593	2	YML088W	UFO1	UPTAG0593	-0.43731	0.143866	-0.320776	0.0159665
2_UPTAG0594	2	YGL087C	MMS2	UPTAG0594	-0.0287656	0.107904	0.0493878	-0.0197119
2_UPTAG0595	2	YGL058W	RAD6	UPTAG0595	-3.31615	0.886173	-2.54239	-0.557724
2_UPTAG0596	2	YDL190C	UFD2	UPTAG0596	-0.179939	0.138573	-0.0883599	0.0200891
2_UPTAG0676	2	YGL078C	DBP3	UPTAG0676	-0.154909	0.11199	-0.0902894	0.0547268
2_UPTAG0677	2	YKR024C	DBP7	UPTAG0677	0.217561	0.0159638	0.201133	0.0936141
2_UPTAG0678	2	YGL173C	XRN1	UPTAG0678	-0.309065	-0.128469	-0.468564	0.00162589
2_UPTAG0679	2	YJL209W	CBP1	UPTAG0679	0.313601	-0.0525919	0.226976	-0.0118973
2_UPTAG0680	2	YLR256W	HAP1	UPTAG0680	-0.309906	0.0971735	-0.244939	-0.0354498
2_UPTAG0681	2	YDR071C	PAA1	UPTAG0681	-0.04473	-0.0581134	-0.126571	-0.129363
2_UPTAG0682	2	YER047C	SAP1	UPTAG0682	-0.0736603	0.00409817	-0.0872984	-0.0988741
2_UPTAG0685	2	YMR019W	STB4	UPTAG0685	-0.173679	-0.393627	-0.621905	0.344553
2_UPTAG0686	2	YOL042W	NGL1	UPTAG0686	0.145014	0.00439254	0.110768	-0.0625875
2_UPTAG0687	2	YNR073C	YNR073C	UPTAG0687	-0.230932	0.0153329	-0.243	0.0802796
2_UPTAG0688	2	YJL105W	SET4	UPTAG0688	-0.0928488	0.0129892	-0.0963817	-0.0936726
2_UPTAG0689	2	YPL165C	SET6	UPTAG0689	0.133697	0.206529	0.294737	-0.115649
2_UPTAG0690	2	YKL072W	STB6	UPTAG0690	-0.0741859	0.363217	-0.0748629	-0.190482
2_UPTAG0691	2	YER130C	COM2	UPTAG0691	-0.445141	-0.111434	-0.586758	0.0921384
2_UPTAG0692	2	YER184C	TOG1	UPTAG0692	-0.076674	0.0407373	-0.0571497	-0.0804268
2_UPTAG0693	2	YJL057C	IKS1	UPTAG0693	0.222713	0.0233354	0.220849	0.0517663
2_UPTAG0694	2	YJL103C	GSM1	UPTAG0694	-0.0776876	0.168041	0.0557984	-0.14559
2_UPTAG0695	2	YJL206C	YJL206C	UPTAG0695	-0.240372	0.0231326	-0.243017	0.00430099
2_UPTAG0696	2	YKL222C	YKL222C	UPTAG0696	-0.302259	0.0403417	-0.288176	-0.168481
2_UPTAG0697	2	YPL230W	USV1	UPTAG0697	0.0948794	0.0423155	0.119233	-0.158595
2_UPTAG0698	2	YPR196W	YPR196W	UPTAG0698	0.197225	-0.0912588	0.0935375	-0.127246
2_UPTAG0699	2	YML017W	PSP2	UPTAG0699	0.274954	0.137794	0.385415	-0.0657046
2_UPTAG0700	2	YBR194W	AIM4	UPTAG0700	0.182884	-0.140283	0.0170204	0.0298463
2_UPTAG0701	2	YDR169C	STB3	UPTAG0701	0.00472688	-0.267846	-0.308125	0.0903868
2_UPTAG0702	2	YER139C	RTR1	UPTAG0702	0.116053	-0.318115	-0.274168	0.250859
2_UPTAG0703	2	YIL137C	TMA108	UPTAG0703	0.00394354	-0.0608352	-0.0835952	-0.000905677
2_UPTAG0705	2	YGL221C	NIF3	UPTAG0705	-0.399292	0.100317	-0.331214	-0.115674
2_UPTAG0707	2	YDL053C	PBP4	UPTAG0707	-0.334993	0.104037	-0.269241	-0.192133
2_UPTAG0708	2	YHR207C	SET5	UPTAG0708	0.766377	-0.225258	0.515699	-0.0847796
2_UPTAG0709	2	YBR150C	TBS1	UPTAG0709	-0.18034	0.166275	-0.0443007	0.0425306
2_UPTAG0710	2	YBL054W	TOD6	UPTAG0710	0.320197	0.275245	0.523465	0.29718
2_UPTAG0711	2	YBR239C	ERT1	UPTAG0711	-0.400577	0.133155	-0.303429	-0.161716
2_UPTAG0712	2	YJR119C	JHD2	UPTAG0712	-0.0835434	0.184976	0.0564126	-0.0818684
2_UPTAG0713	2	YKR064W	OAF3	UPTAG0713	-0.348234	0.224979	-0.169182	-0.179553
2_UPTAG0714	2	YLR327C	TMA10	UPTAG0714	0.0461551	0.160998	-0.222071	0.209844
2_UPTAG0716	2	YHL018W	YHL018W	UPTAG0716	0.0811599	-0.0595688	-0.005672	0.0671532
2_UPTAG0717	2	YKL070W	YKL070W	UPTAG0717	0.0711031	-0.0904882	-0.0969978	0.276341
2_UPTAG0718	2	YPR125W	YLH47	UPTAG0718	0.11145	-0.0939542	-0.012279	0.0842228
2_UPTAG0719	2	YCR087C-A	YCR087C-A	UPTAG0719	-0.249921	-0.0448448	-0.313106	-0.0479884
2_UPTAG0720	2	YDR026C	NSI1	UPTAG0720	-0.00848307	0.0460278	0.00540823	-0.0123206
2_UPTAG0722	2	YDL070W	BDF2	UPTAG0722	-0.256896	0.0135642	-0.271368	-0.183808
2_UPTAG0723	2	YNL215W	IES2	UPTAG0723	0.212162	-0.0725066	0.110298	0.0959049
2_UPTAG0724	2	YOR189W	IES4	UPTAG0724	-0.51193	0.0999578	-0.438759	0.173161
2_UPTAG0725	2	YER092W	IES5	UPTAG0725	0.40868	-0.231195	0.153199	-0.0968284
2_UPTAG0726	2	YMR075W	RCO1	UPTAG0726	-0.780139	0.253043	-0.556694	0.0680665
2_UPTAG0727	2	YDR257C	RKM4	UPTAG0727	0.036281	-0.0972454	-0.0810354	-0.0347132
2_UPTAG0728	2	YGR071C	ENV11	UPTAG0728	-0.225236	0.218049	-0.0357867	0.0336633
2_UPTAG0729	2	YIL130W	ASG1	UPTAG0729	-0.042405	0.0667494	-0.00464023	0.0202291
2_UPTAG0730	2	YLR278C	YLR278C	UPTAG0730	-0.156547	0.094116	-0.0854056	-0.0689853
2_UPTAG0731	2	YML081W	TDA9	UPTAG0731	0.218086	-0.168587	0.0166918	0.263907
2_UPTAG0732	2	YEL018W	EAF5	UPTAG0732	-0.125622	0.093331	-0.0624493	0.169552
2_UPTAG0733	2	YJR082C	EAF6	UPTAG0733	0.0308232	0.394476	0.385871	-0.0399866
2_UPTAG0734	2	YDR482C	CWC21	UPTAG0734	0.228032	0.0385125	0.174302	0.119849
2_UPTAG0735	2	YPL064C	CWC27	UPTAG0735	0.0687093	0.0359466	0.0760217	0.160399
2_UPTAG0736	2	YGR100W	MDR1	UPTAG0736	0.182892	-0.0656034	0.0943305	0.121652
2_UPTAG0737	2	YNL175C	NOP13	UPTAG0737	0.0517784	0.15337	0.174338	0.0572418
2_UPTAG0738	2	YER041W	YEN1	UPTAG0738	-0.134107	0.324525	0.0716327	0.121222
2_UPTAG0739	2	YNL023C	FAP1	UPTAG0739	-0.0537074	0.121569	0.0103182	0.0115875
2_UPTAG0740	2	YJR127C	RSF2	UPTAG0740	0.243332	-0.0357695	-0.0607127	0.0627436
2_UPTAG0741	2	YLL054C	YLL054C	UPTAG0741	-0.0557252	0.117877	0.0334529	-0.0795571
2_UPTAG0742	2	YLR436C	ECM30	UPTAG0742	0.265972	-0.263711	-0.03419	0.282734
2_UPTAG0743	2	YMR176W	ECM5	UPTAG0743	-0.0978517	0.0338321	-0.0870415	-0.179914
2_UPTAG0744	2	YKR019C	IRS4	UPTAG0744	-0.0211814	-0.0819321	-0.124157	-0.0103642
2_UPTAG0745	2	YBR065C	ECM2	UPTAG0745	-0.0532749	0.0161662	-0.0648949	0.0487417
2_UPTAG0748	2	YNL030W	HHF2	UPTAG0748	-0.246782	0.164892	-0.108105	-0.0344986
2_UPTAG0750	2	YDR225W	HTA1	UPTAG0750	0.0615609	0.0973679	0.0991233	-0.00149525
2_UPTAG0751	2	YBL003C	HTA2	UPTAG0751	-0.356685	-0.064553	-0.45847	0.0780407
2_UPTAG0752	2	YBL002W	HTB2	UPTAG0752	-0.0918152	0.00560914	-0.115113	0.144337
2_UPTAG0753	2	YBR010W	HHT1	UPTAG0753	-0.42906	0.224964	-0.24293	0.0480319
2_UPTAG0755	2	YDR073W	SNF11	UPTAG0755	-0.341481	0.121383	-0.248301	-0.0647103
2_UPTAG0756	2	YNR023W	SNF12	UPTAG0756	0.221684	-0.0641133	0.126683	0.249209
2_UPTAG0758	2	YBR289W	SNF5	UPTAG0758	1.77832	-0.390696	1.27619	0.145274
2_UPTAG0759	2	YHL025W	SNF6	UPTAG0759	1.48896	-0.495817	0.891937	0.151398
2_UPTAG0761	2	YDR334W	SWR1	UPTAG0761	-0.0172387	0.0249328	-0.0205661	0.0396918
2_UPTAG0762	2	YFL013C	IES1	UPTAG0762	0.10215	-0.0527274	0.0210409	-0.0150439
2_UPTAG0763	2	YLR052W	IES3	UPTAG0763	0.256809	-0.255601	-0.0137382	0.0148495
2_UPTAG0764	2	YDL002C	NHP10	UPTAG0764	-0.0308176	-0.0601224	-0.245584	0.0187005
2_UPTAG0768	2	YMR044W	IOC4	UPTAG0768	0.240369	-0.025713	0.188824	-0.20493
2_UPTAG0769	2	YER164W	CHD1	UPTAG0769	0.191585	0.00414437	0.167329	-0.0108203
2_UPTAG0770	2	YPL129W	TAF14	UPTAG0770	0.767327	-0.495351	0.227462	0.381795
2_UPTAG0771	2	YJL127C	SPT10	UPTAG0771	0.118073	-0.073806	0.0191388	-0.000172794
2_UPTAG0772	2	YGL133W	ITC1	UPTAG0772	-0.14806	-0.00183208	-0.183866	0.117026
2_UPTAG0774	2	YAL011W	SWC3	UPTAG0774	-0.429442	0.0402125	-0.509962	0.238894
2_UPTAG0775	2	YBR112C	CYC8	UPTAG0775	0.0909815	0.0391733	0.0823878	-0.0845686
2_UPTAG0776	2	YDL076C	RXT3	UPTAG0776	0.839201	-0.226531	0.579745	-0.0395546
2_UPTAG0777	2	YOL068C	HST1	UPTAG0777	0.335882	0.0063401	0.30755	0.00797882
2_UPTAG0778	2	YOR279C	RFM1	UPTAG0778	0.0102131	0.104167	0.0679188	-0.0667583
2_UPTAG0779	2	YDR439W	LRS4	UPTAG0779	0.147891	0.0549521	0.169549	0.188991
2_UPTAG0781	2	YDR363W	ESC2	UPTAG0781	0.265507	-0.0163644	0.225342	-0.0339886
2_UPTAG0782	2	YDL197C	ASF2	UPTAG0782	-0.211525	0.260458	0.0183774	-0.20009
2_UPTAG0783	2	YKR101W	SIR1	UPTAG0783	-0.106904	0.15454	0.0166609	-0.0568458
2_UPTAG0784	2	YMR127C	SAS2	UPTAG0784	-0.302107	-0.0637294	-0.402356	-0.115632
2_UPTAG0785	2	YLL022C	HIF1	UPTAG0785	0.0290561	-0.048356	-0.0470456	0.0346698
2_UPTAG0786	2	YPL015C	HST2	UPTAG0786	-0.244733	0.275311	-0.0141268	-0.0811592
2_UPTAG0787	2	YDR191W	HST4	UPTAG0787	-0.0655796	0.0540796	-0.038925	-0.0825279
2_UPTAG0788	2	YOR025W	HST3	UPTAG0788	0.55045	-0.142424	0.376484	-0.0877255
2_UPTAG0790	2	YBL052C	SAS3	UPTAG0790	-0.295064	0.255226	-0.0741353	-0.217141
2_UPTAG0791	2	YNL330C	RPD3	UPTAG0791	0.771999	-0.0543238	0.673809	-0.290759
2_UPTAG0792	2	YMR263W	SAP30	UPTAG0792	0.355951	-0.0650582	0.258666	-0.203995
2_UPTAG0794	2	YBR275C	RIF1	UPTAG0794	0.110311	-0.160303	-0.113806	0.0926024
2_UPTAG0795	2	YAR003W	SWD1	UPTAG0795	0.40234	-0.00380162	0.369141	-0.0653407
2_UPTAG0796	2	YDR310C	SUM1	UPTAG0796	0.302051	0.159211	0.431838	-0.0765063
2_UPTAG0797	2	YDL074C	BRE1	UPTAG0797	-2.73324	0.301937	-2.43804	0.0993721
2_UPTAG0798	2	YIL084C	SDS3	UPTAG0798	0.391013	-0.0702454	0.292959	-0.184142
2_UPTAG0799	2	YLR270W	DCS1	UPTAG0799	0.108694	0.08843	0.165909	0.0180095
2_UPTAG0800	2	YGL222C	EDC1	UPTAG0800	-0.13382	0.0532914	-0.110194	0.0583084
2_UPTAG0801	2	YER035W	EDC2	UPTAG0801	-0.0888854	0.0701717	-0.0365239	-0.0830335
2_UPTAG0803	2	YEL015W	EDC3	UPTAG0803	-0.496902	0.170262	-0.354485	0.119699
2_UPTAG0804	2	YGR249W	MGA1	UPTAG0804	0.136842	0.141854	0.248742	-0.0309877
2_UPTAG0805	2	YKL038W	RGT1	UPTAG0805	0.268884	0.0903905	0.142363	0.0697885
2_UPTAG0806	2	YPR134W	MSS18	UPTAG0806	-0.0918753	-0.0198812	-0.140694	0.00587554
2_UPTAG0807	2	YIR021W	MRS1	UPTAG0807	-0.0557234	0.161386	0.0710765	0.0153854
2_UPTAG0808	2	YHL038C	CBP2	UPTAG0808	0.155007	0.210925	0.390371	0.347527
2_UPTAG0811	2	YGL066W	SGF73	UPTAG0811	0.799285	-0.231737	0.539297	0.198422
2_UPTAG0812	2	YDR448W	ADA2	UPTAG0812	2.29433	-0.870325	1.39607	-0.0084722
2_UPTAG0813	2	YLR055C	SPT8	UPTAG0813	0.0486725	-0.00161977	0.0124912	0.0747595
2_UPTAG0814	2	YDR176W	NGG1	UPTAG0814	1.90309	-0.693772	1.1533	-0.0459884
2_UPTAG0816	2	YPL116W	HOS3	UPTAG0816	-0.365376	0.0107694	-0.378513	-0.0616688
2_UPTAG0817	2	YMR053C	STB2	UPTAG0817	0.0162775	-0.0455159	-0.0625038	0.161231
2_UPTAG0818	2	YNL255C	GIS2	UPTAG0818	0.144755	-0.026804	0.0826079	0.0480879
2_UPTAG0819	2	YGL252C	RTG2	UPTAG0819	0.114076	0.339303	0.430233	0.0529014
2_UPTAG0820	2	YBR066C	NRG2	UPTAG0820	-0.0400279	0.144251	0.0720318	0.0828049
2_UPTAG0822	2	YBR212W	NGR1	UPTAG0822	0.190826	-0.0603414	0.10499	0.280418
2_UPTAG0823	2	YOR076C	SKI7	UPTAG0823	-0.0252132	0.0474285	-0.00621949	0.0727729
2_UPTAG0824	2	YPR189W	SKI3	UPTAG0824	-0.0129694	0.146047	0.0616157	0.157434
2_UPTAG0825	2	YMR080C	NAM7	UPTAG0825	0.788727	-0.101063	0.656127	0.215131
2_UPTAG0826	2	YGR072W	UPF3	UPTAG0826	-0.348603	-0.158775	-0.536163	0.0929556
2_UPTAG0827	2	YLR136C	TIS11	UPTAG0827	-0.151538	-0.0192872	-0.197996	0.051645
2_UPTAG0828	2	YHR077C	NMD2	UPTAG0828	0.141193	-0.181156	-0.0713282	0.214597
2_UPTAG0829	2	YPR042C	PUF2	UPTAG0829	0.242439	-0.252748	-0.04064	0.340966
2_UPTAG0830	2	YLL013C	PUF3	UPTAG0830	0.642529	-0.163319	0.441821	-0.2607
2_UPTAG0831	2	YLR363C	NMD4	UPTAG0831	-0.251319	0.193165	-0.105237	-0.00520801
2_UPTAG0832	2	YNL016W	PUB1	UPTAG0832	0.796741	0.0745016	0.816328	-0.153996
2_UPTAG0833	2	YIR001C	SGN1	UPTAG0833	-0.385378	-0.0198046	-0.437776	0.0223328
2_UPTAG0834	2	YER032W	FIR1	UPTAG0834	0.160134	0.131888	0.261325	-0.0234025
2_UPTAG0835	2	YGR178C	PBP1	UPTAG0835	0.0958666	0.0312237	0.100714	-0.0332178
2_UPTAG0836	2	YIL030C	SSM4	UPTAG0836	0.953617	-0.155216	0.702388	-0.319277
2_UPTAG0837	2	YKL208W	CBT1	UPTAG0837	-0.285407	0.0936229	-0.251812	-0.056449
2_UPTAG0838	2	YGL094C	PAN2	UPTAG0838	0.862503	-0.362518	0.474673	-0.0792686
2_UPTAG0839	2	YDR195W	REF2	UPTAG0839	-0.846886	0.0607188	-0.814461	0.123703
2_UPTAG0841	2	YDL175C	AIR2	UPTAG0841	-0.203657	0.0883216	-0.142876	0.0551331
2_UPTAG0842	2	YIL079C	AIR1	UPTAG0842	-0.321524	0.296136	-0.055189	-0.0497959
2_UPTAG0843	2	YDR432W	NPL3	UPTAG0843	0.379167	0.35383	0.749438	-0.28752
2_UPTAG0844	2	YHR015W	MIP6	UPTAG0844	-0.142559	0.0429327	-0.129005	-0.0343767
2_UPTAG0845	2	YJL140W	RPB4	UPTAG0845	0.45808	-0.189203	0.231843	0.191569
2_UPTAG0847	2	YML062C	MFT1	UPTAG0847	0.196351	0.154478	0.320776	-0.0383578
2_UPTAG0849	2	YHR167W	THP2	UPTAG0849	0.165288	0.149196	0.286279	-0.179037
2_UPTAG0850	2	YDR159W	SAC3	UPTAG0850	1.49025	-0.454112	1.00595	-0.0112425
2_UPTAG0851	2	YDR395W	SXM1	UPTAG0851	-0.262504	0.0498884	-0.249782	-0.0918956
2_UPTAG0853	2	YLR335W	NUP2	UPTAG0853	0.158724	0.198718	0.329256	-0.0581074
2_UPTAG0854	2	YMR129W	POM152	UPTAG0854	-0.397183	0.221072	-0.212146	0.026692
2_UPTAG0855	2	YDL088C	ASM4	UPTAG0855	-0.242854	0.284029	0.00906896	0.106105
2_UPTAG0856	2	YER107C	GLE2	UPTAG0856	0.500702	-0.106399	0.369468	0.00720361
2_UPTAG0858	2	YKL057C	NUP120	UPTAG0858	0.216635	-0.0303039	0.167831	-0.116936
2_UPTAG0859	2	YKR082W	NUP133	UPTAG0859	0.45661	-0.231226	0.184773	0.182721
2_UPTAG0860	2	YER105C	NUP157	UPTAG0860	-0.0761104	-0.0309473	-0.115593	-0.155333
2_UPTAG0861	2	YBL079W	NUP170	UPTAG0861	-0.0839492	0.21063	0.102993	0.00719385
2_UPTAG0862	2	YML103C	NUP188	UPTAG0862	-0.0746645	0.0541774	-0.048785	-0.108102
2_UPTAG0863	2	YDR192C	NUP42	UPTAG0863	-0.0606869	0.079425	-0.00205762	-0.054465
2_UPTAG0864	2	YMR153W	NUP53	UPTAG0864	0.0760845	-0.223105	-0.233063	0.239118
2_UPTAG0865	2	YDL116W	NUP84	UPTAG0865	1.39595	-0.334306	1.03825	0.252134
2_UPTAG0866	2	YGL100W	SEH1	UPTAG0866	0.108773	-0.106492	-0.0269125	0.0834795
2_UPTAG0867	2	YML113W	DAT1	UPTAG0867	-0.145592	0.196944	-0.00325511	0.0160365
2_UPTAG0868	2	YER161C	SPT2	UPTAG0868	0.29667	-0.0426045	0.231515	-0.069301
2_UPTAG0869	2	YDR443C	SSN2	UPTAG0869	0.424167	0.0505583	0.440582	0.0140378
2_UPTAG0870	2	YBR050C	REG2	UPTAG0870	-0.017334	0.124847	0.084753	0.0395881
2_UPTAG0871	2	YMR182C	RGM1	UPTAG0871	0.304717	-0.0581966	0.000124923	-0.358799
2_UPTAG0872	2	YNL167C	SKO1	UPTAG0872	-0.0862526	-0.0546148	-0.177493	-0.0347912
2_UPTAG0873	2	YCR081W	SRB8	UPTAG0873	0.492944	-0.120369	0.333266	-0.0793234
2_UPTAG0874	2	YOR140W	SFL1	UPTAG0874	-0.161941	0.245285	0.0549333	-0.122592
2_UPTAG0875	2	YPR065W	ROX1	UPTAG0875	0.870888	-0.195704	0.644631	-0.58146
2_UPTAG0876	2	YKL005C	BYE1	UPTAG0876	-0.0500953	0.095482	0.0169124	0.0570655
2_UPTAG0877	2	YER028C	MIG3	UPTAG0877	-0.0749296	0.128945	0.0256913	-0.0532403
2_UPTAG0879	2	YJL110C	GZF3	UPTAG0879	0.0357255	-0.0998166	-0.106094	0.159288
2_UPTAG0880	2	YDR005C	MAF1	UPTAG0880	0.0879552	0.141775	0.213045	-0.144038
2_UPTAG0882	2	YDR207C	UME6	UPTAG0882	0.518755	-0.237011	0.247619	0.167715
2_UPTAG0883	2	YML029W	USA1	UPTAG0883	-0.280155	-0.126657	-0.436444	0.0939219
2_UPTAG0884	2	YDR163W	CWC15	UPTAG0884	-0.0394884	-0.0400004	-0.105935	-0.0572177
2_UPTAG0885	2	YPR101W	SNT309	UPTAG0885	0.975796	-0.504229	0.439614	0.349487
2_UPTAG0886	2	YMR125W	STO1	UPTAG0886	-0.140678	0.0560836	-0.126223	-0.237762
2_UPTAG0888	2	YBR119W	MUD1	UPTAG0888	0.136868	0.431324	0.432591	0.0436581
2_UPTAG0889	2	YNL286W	CUS2	UPTAG0889	0.643303	-0.04682	0.529927	-0.568986
2_UPTAG0892	2	YPL213W	LEA1	UPTAG0892	0.982375	-0.64043	0.305637	0.278794
2_UPTAG0893	2	YJR050W	ISY1	UPTAG0893	-0.13384	-0.0207907	-0.191811	-0.146241
2_UPTAG0894	2	YBR188C	NTC20	UPTAG0894	0.421126	-0.105101	0.278093	0.175221
2_UPTAG0897	2	YOR308C	SNU66	UPTAG0897	-0.0179402	-0.00907387	-0.0582032	0.152839
2_UPTAG0898	2	YHR165C	PRP8	UPTAG0898	-0.280288	0.106962	-0.206164	-0.0862207
2_UPTAG0899	2	YDR378C	LSM6	UPTAG0899	1.03347	-0.412242	0.584338	0.0591211
2_UPTAG0901	2	YOR185C	GSP2	UPTAG0901	-0.114832	0.0684538	-0.0719539	0.0490936
2_UPTAG0902	2	YLR018C	POM34	UPTAG0902	-0.10185	-0.0707606	-0.19713	0.016958
2_UPTAG0903	2	YKR092C	SRP40	UPTAG0903	-0.1248	0.00824892	-0.142975	0.0661512
2_UPTAG0904	2	YAR002W	NUP60	UPTAG0904	0.560266	-0.197877	0.341917	0.0612483
2_UPTAG0905	2	YPR018W	RLF2	UPTAG0905	0.852249	-0.116406	0.600328	-0.161212
2_UPTAG0906	2	YOR023C	AHC1	UPTAG0906	-0.122806	0.00171794	-0.149099	-0.0347759
2_UPTAG0907	2	YAL051W	OAF1	UPTAG0907	-0.0983004	0.0211653	-0.0938985	-0.0089333
2_UPTAG0908	2	YOR363C	PIP2	UPTAG0908	0.0141288	-0.117615	-0.285341	-0.00836689
2_UPTAG0909	2	YGR233C	PHO81	UPTAG0909	-0.0138713	0.245027	0.07277	-0.332258
2_UPTAG0910	2	YFR034C	PHO4	UPTAG0910	-0.0294525	-0.0556802	-0.116448	-0.166355
2_UPTAG0912	2	YNL004W	HRB1	UPTAG0912	0.268265	0.377712	0.625277	-0.530596
2_UPTAG0913	2	YKL214C	YRA2	UPTAG0913	-0.304574	0.075983	-0.259857	-0.0595881
2_UPTAG0914	2	YPL181W	CTI6	UPTAG0914	-0.339371	-0.168052	-0.539387	0.0378103
2_UPTAG0915	2	YIR018W	YAP5	UPTAG0915	-0.0161761	-0.0876596	-0.125464	-0.0372488
2_UPTAG0916	2	YDR259C	YAP6	UPTAG0916	-0.406362	0.00678956	-0.46809	-0.0385686
2_UPTAG0917	2	YOL028C	YAP7	UPTAG0917	-0.142901	0.0113397	-0.163523	-0.0617435
2_UPTAG0918	2	YHR006W	STP2	UPTAG0918	0.00315118	-0.0585622	-0.0816076	0.0650419
2_UPTAG0919	2	YOR298C-A	MBF1	UPTAG0919	-0.19638	0.039713	-0.185638	-0.0172208
2_UPTAG0920	2	YBR182C	SMP1	UPTAG0920	0.333698	-0.106401	0.206581	-0.0920432
2_UPTAG0921	2	YMR042W	ARG80	UPTAG0921	-0.307229	0.124786	-0.211891	-0.0354903
2_UPTAG0922	2	YOL108C	INO4	UPTAG0922	-0.0191005	0.342107	0.266001	-0.0500362
2_UPTAG0923	2	YPR005C	HAL1	UPTAG0923	0.179453	0.252646	0.369852	0.0101394
2_UPTAG0924	2	YDR423C	CAD1	UPTAG0924	0.422853	0.312853	0.637253	0.0413229
2_UPTAG0927	2	YDR421W	ARO80	UPTAG0927	-0.0352461	-0.17141	-0.230133	0.0254964
2_UPTAG0928	2	YMR280C	CAT8	UPTAG0928	-0.0266015	0.0185816	-0.0302414	0.027587
2_UPTAG0929	2	YDR123C	INO2	UPTAG0929	0.168313	0.105116	0.246685	-0.0815768
2_UPTAG0930	2	YMR021C	MAC1	UPTAG0930	0.178859	-0.0453688	0.0939408	0.129057
2_UPTAG0931	2	YKL015W	PUT3	UPTAG0931	-0.383582	0.365144	-0.0738519	0.125506
2_UPTAG0933	2	YMR039C	SUB1	UPTAG0933	0.121101	-0.218345	-0.118138	0.214577
2_UPTAG0935	2	YGL071W	AFT1	UPTAG0935	0.213629	-0.0599649	0.0859345	-0.0751518
2_UPTAG0936	2	YGL254W	FZF1	UPTAG0936	-0.269323	0.406535	0.0931431	-0.0164245
2_UPTAG0937	2	YDR463W	STP1	UPTAG0937	0.152501	0.666507	0.797413	0.233668
2_UPTAG0939	2	YIR033W	MGA2	UPTAG0939	0.235629	-0.0872445	0.110083	0.293803
2_UPTAG0940	2	YKL020C	SPT23	UPTAG0940	0.120157	-0.0301538	0.0603315	-0.0197014
2_UPTAG0944	2	YPR073C	LTP1	UPTAG0944	-0.0638513	0.145952	0.0464452	-0.0168091
2_UPTAG0945	2	YGL208W	SIP2	UPTAG0945	-0.095706	0.100493	-0.0312869	0.216054
2_UPTAG0946	2	YDR422C	SIP1	UPTAG0946	-0.211667	0.258279	0.00990073	-0.172607
2_UPTAG0952	2	YGL213C	SKI8	UPTAG0952	0.0822322	0.169803	0.221493	0.299011
2_UPTAG0954	2	YPL072W	UBP16	UPTAG0954	0.071198	0.16289	0.201268	0.038562
2_UPTAG0955	2	YNL186W	UBP10	UPTAG0955	0.117534	-0.045651	0.0266542	0.222848
2_UPTAG0956	2	YFR010W	UBP6	UPTAG0956	-0.629362	0.0513474	-0.603929	0.220847
2_UPTAG0957	2	YMR223W	UBP8	UPTAG0957	1.09642	-0.463504	0.606998	0.205831
2_UPTAG0958	2	YDR457W	TOM1	UPTAG0958	-0.276616	0.315995	0.00953154	0.0681354
2_UPTAG0959	2	YDR335W	MSN5	UPTAG0959	0.921131	-0.579114	0.31878	0.299006
2_UPTAG0960	2	YBR165W	UBS1	UPTAG0960	-0.0984559	-0.0313108	-0.140454	-0.0241383
2_UPTAG0961	2	YIL149C	MLP2	UPTAG0961	0.0555523	0.119745	0.142891	-0.0493513
2_UPTAG0963	2	YGL241W	KAP114	UPTAG0963	-0.0775459	0.03663	-0.0688651	-0.0222727
2_UPTAG0965	2	YJR132W	NMD5	UPTAG0965	0.412388	-0.310919	0.0648748	0.409511
2_UPTAG0966	2	YJR074W	MOG1	UPTAG0966	0.435783	0.00641258	0.412386	0.0837611
2_UPTAG0967	2	YPL125W	KAP120	UPTAG0967	0.415428	-0.191512	0.199463	0.194452
2_UPTAG0968	2	YBR017C	KAP104	UPTAG0968	0.240761	0.0674908	0.279872	-0.201926
2_UPTAG0969	2	YGL016W	KAP122	UPTAG0969	0.121129	-0.101736	0.012971	0.108806
2_UPTAG0970	2	YJR147W	HMS2	UPTAG0970	-0.552757	0.187726	-0.398585	0.0767932
2_UPTAG0971	2	YKL043W	PHD1	UPTAG0971	0.495352	0.0139407	0.481104	0.105751
2_UPTAG0972	2	YIL010W	DOT5	UPTAG0972	-0.174367	0.101638	-0.0990184	0.107958
2_UPTAG0973	2	YNL229C	URE2	UPTAG0973	0.61616	-0.306188	0.279544	0.447864
2_UPTAG0974	2	YOL001W	PHO80	UPTAG0974	-0.229493	-0.0281753	-0.28502	0.114825
2_UPTAG0975	2	YNL278W	CAF120	UPTAG0975	-0.253653	0.142923	-0.135742	-0.10548
2_UPTAG0976	2	YGR134W	CAF130	UPTAG0976	0.172073	0.174712	0.317827	-0.29558
2_UPTAG0977	2	YNL288W	CAF40	UPTAG0977	0.262536	-0.143915	0.0871411	0.317777
2_UPTAG0978	2	YGL151W	NUT1	UPTAG0978	-0.116212	0.0891597	-0.0561316	-0.0394495
2_UPTAG0979	2	YMR179W	SPT21	UPTAG0979	-0.105697	0.000588537	-0.142842	0.108234
2_UPTAG0980	2	YPL101W	ELP4	UPTAG0980	0.238746	-0.0786301	0.13243	0.210359
2_UPTAG0981	2	YGR200C	ELP2	UPTAG0981	1.44574	-0.658121	0.74853	-0.130316
2_UPTAG0982	2	YMR312W	ELP6	UPTAG0982	0.557259	-0.0963389	0.432207	0.16077
2_UPTAG0983	2	YHR187W	IKI1	UPTAG0983	0.725649	0.0189055	0.698335	0.453437
2_UPTAG0984	2	YPL086C	ELP3	UPTAG0984	0.401806	-0.135223	0.240032	0.133133
2_UPTAG0985	2	YLR384C	IKI3	UPTAG0985	0.636756	-0.00784473	0.604115	0.0473537
2_UPTAG0986	2	YHL009C	YAP3	UPTAG0986	0.216933	-0.00303166	0.175127	-0.233092
2_UPTAG0987	2	YAL021C	CCR4	UPTAG0987	0.698954	-0.148733	0.53364	-0.274539
2_UPTAG0988	2	YIL038C	NOT3	UPTAG0988	-0.442756	0.307805	-0.165115	-0.0834414
2_UPTAG0990	2	YNR052C	POP2	UPTAG0990	-0.103261	0.209882	0.0792665	0.0758765
2_UPTAG0993	2	YBR089C-A	NHP6B	UPTAG0993	-0.265759	0.125395	-0.171649	-0.0361835
2_UPTAG0994	2	YBL005W	PDR3	UPTAG0994	-0.0187558	-0.0998347	-0.155094	-0.000267849
2_UPTAG0997	2	YIR017C	MET28	UPTAG0997	-0.0881216	-0.0134947	-0.147208	0.0763079
2_UPTAG0998	2	YDR043C	NRG1	UPTAG0998	0.0929653	-0.0117408	0.0466173	0.130717
2_UPTAG0999	2	YGL013C	PDR1	UPTAG0999	-0.694352	0.131839	-0.619441	0.0498848
2_UPTAG1000	2	YJL056C	ZAP1	UPTAG1000	0.295259	-0.0720732	0.175995	0.229895
2_UPTAG1001	2	YHR099W	TRA1	UPTAG1001	-0.25098	0.251495	-0.0452617	-0.021194
2_UPTAG1002	2	YOL004W	SIN3	UPTAG1002	1.01373	-0.434027	0.540166	0.0181487
2_UPTAG1003	2	YAL013W	DEP1	UPTAG1003	0.426291	0.0272478	0.399644	-0.024419
2_UPTAG1004	2	YER088C	DOT6	UPTAG1004	0.250133	0.160774	0.337511	0.0112586
2_UPTAG1005	2	YNL136W	EAF7	UPTAG1005	0.222913	-0.0854757	0.107294	0.115818
2_UPTAG1006	2	YGL115W	SNF4	UPTAG1006	0.216378	0.353245	0.497647	-0.028536
2_UPTAG1007	2	YOR047C	STD1	UPTAG1007	0.232491	-0.0114581	0.191402	-0.0901815
2_UPTAG1008	2	YGL035C	MIG1	UPTAG1008	0.637306	0.00877253	0.617249	-0.236196
2_UPTAG1009	2	YIR023W	DAL81	UPTAG1009	0.273165	-0.0124449	0.211928	0.125223
2_UPTAG1010	2	YLR451W	LEU3	UPTAG1010	0.0215179	0.0490279	0.0166631	-0.122015
2_UPTAG1011	2	YGL209W	MIG2	UPTAG1011	-0.0863356	0.16473	0.0302858	0.0328259
2_UPTAG1012	2	YJL089W	SIP4	UPTAG1012	0.0725315	0.0869379	0.117935	0.0863874
2_UPTAG1013	2	YPR009W	SUT2	UPTAG1013	-0.166381	0.139706	-0.0781986	-0.127713
2_UPTAG1014	2	YFL031W	HAC1	UPTAG1014	-0.102575	0.324971	0.179063	-0.170329
2_UPTAG1015	2	YGL162W	SUT1	UPTAG1015	0.0120988	0.266852	0.216983	0.172515
2_UPTAG1016	2	YDL170W	UGA3	UPTAG1016	0.0179553	0.112376	0.0692614	0.0203434
2_UPTAG1017	2	YPL038W	MET31	UPTAG1017	-0.167541	0.0938486	-0.105728	0.235845
2_UPTAG1018	2	YFL028C	CAF16	UPTAG1018	0.658053	-0.0103937	0.59902	-0.201924
2_UPTAG1020	2	YKR036C	CAF4	UPTAG1020	0.342294	0.12417	0.438963	-0.170037
2_UPTAG1021	2	YPL127C	HHO1	UPTAG1021	-0.105026	0.33668	0.167744	0.0869793
2_UPTAG1024	2	YGR063C	SPT4	UPTAG1024	0.650446	0.0517993	0.682722	0.101105
2_UPTAG1025	2	YDR009W	GAL3	UPTAG1025	0.165911	-0.00126963	0.132312	-0.085672
2_UPTAG1026	2	YML051W	GAL80	UPTAG1026	-0.404455	0.11836	-0.314939	0.0560034
2_UPTAG1027	2	YNL027W	CRZ1	UPTAG1027	0.483753	-0.146672	0.309882	0.235747
2_UPTAG1028	2	YLR098C	CHA4	UPTAG1028	0.00855103	0.0838944	0.0645084	0.0715937
2_UPTAG1029	2	YGR288W	MAL13	UPTAG1029	0.264808	-0.13938	0.0916902	-0.012598
2_UPTAG1030	2	YBR297W	MAL33	UPTAG1030	0.834319	-0.214928	0.565597	-0.272191
2_UPTAG1032	2	YPL248C	GAL4	UPTAG1032	0.900492	-0.292825	0.569577	-0.124497
2_UPTAG1033	2	YML076C	WAR1	UPTAG1033	-0.108768	-0.0348888	-0.171478	-0.122065
2_UPTAG1034	2	YNL239W	LAP3	UPTAG1034	0.387341	0.0355785	0.396512	-0.192584
2_UPTAG1035	2	YML007W	YAP1	UPTAG1035	0.308031	0.0329165	0.302806	-0.444535
2_UPTAG1037	2	YKL062W	MSN4	UPTAG1037	0.100386	1.53703	1.27104	-0.0309654
2_UPTAG1038	2	YLR266C	PDR8	UPTAG1038	0.106903	0.0467516	0.118737	0.0325214
2_UPTAG1039	2	YMR037C	MSN2	UPTAG1039	-0.0207872	0.0539414	0.0144978	-0.0315053
2_UPTAG1040	2	YCR106W	RDS1	UPTAG1040	0.289084	-0.103317	0.170343	-1.74149
2_UPTAG1041	2	YPL133C	RDS2	UPTAG1041	-0.353604	0.149762	-0.23106	0.125996
2_UPTAG1043	2	YPL029W	SUV3	UPTAG1043	-0.00448305	-0.146952	-0.178484	0.17676
2_UPTAG1044	2	YMR287C	DSS1	UPTAG1044	0.416482	-0.177949	-0.230803	0.227089
2_UPTAG1045	2	YKL149C	DBR1	UPTAG1045	-0.357315	-0.0844719	-0.462517	-0.00294512
2_UPTAG1046	2	YOL054W	PSH1	UPTAG1046	-0.0135479	-0.0884276	-0.11925	0.0316477
2_UPTAG1047	2	YLR418C	CDC73	UPTAG1047	-0.212834	-0.138557	-0.375624	0.193652
2_UPTAG1049	2	YNL230C	ELA1	UPTAG1049	-0.098128	-0.0574096	-0.174149	0.0168228
2_UPTAG1050	2	YPL046C	ELC1	UPTAG1050	-0.133488	-0.0632129	-0.217768	0.110477
2_UPTAG1051	2	YPR129W	SCD6	UPTAG1051	-0.428939	0.215061	-0.24133	0.151565
2_UPTAG1052	2	YHR121W	LSM12	UPTAG1052	-0.202195	0.0851343	-0.152319	0.0781029
2_UPTAG1053	2	YHL034C	SBP1	UPTAG1053	0.796282	-0.590915	0.18036	-0.0363535
2_UPTAG1054	2	YLR107W	REX3	UPTAG1054	-0.0104389	-0.0307333	-0.0691891	0.0978747
2_UPTAG1055	2	YLR059C	REX2	UPTAG1055	-0.011359	0.371684	0.306093	0.100646
2_UPTAG1056	2	YOR017W	PET127	UPTAG1056	-0.24008	0.491092	0.197511	0.054136
2_UPTAG1057	2	YMR180C	CTL1	UPTAG1057	0.493417	0.161947	0.609746	0.0285717
2_UPTAG1058	2	YFL001W	DEG1	UPTAG1058	1.70071	-0.395787	1.27842	-0.199737
2_UPTAG1059	2	YDR194C	MSS116	UPTAG1059	-0.102371	0.0687088	-0.0571724	0.0847946
2_UPTAG1060	2	YJL133W	MRS3	UPTAG1060	-0.0129892	-0.0878376	-0.117794	0.0233811
2_UPTAG1061	2	YKR052C	MRS4	UPTAG1061	-0.304473	0.0130407	-0.319954	0.00572167
2_UPTAG1062	2	YMR285C	NGL2	UPTAG1062	-0.0424633	0.219626	0.146596	0.0903753
2_UPTAG1063	2	YLR293C	GSP1	UPTAG1063	0.485607	-0.0494753	0.405443	0.070114
2_UPTAG1064	2	YPL157W	TGS1	UPTAG1064	0.56829	-0.346876	0.19443	0.178237
2_UPTAG1065	2	YPR057W	BRR1	UPTAG1065	0.254265	-0.102917	0.117678	0.1871
2_UPTAG1066	2	YIR005W	IST3	UPTAG1066	0.29215	-0.0433165	0.221464	0.202897
2_UPTAG1067	2	YHL027W	RIM101	UPTAG1067	-0.0178914	0.0296188	-0.0137964	0.0713306
2_UPTAG1068	2	YDR392W	SPT3	UPTAG1068	0.277778	-0.312082	-0.0937196	0.0626671
2_UPTAG1069	2	YLR399C	BDF1	UPTAG1069	-0.271071	0.0332689	-0.275594	0.0164222
2_UPTAG1071	2	YOR337W	TEA1	UPTAG1071	-0.159735	0.580696	0.394258	-0.150471
2_UPTAG1072	2	YMR070W	MOT3	UPTAG1072	0.228093	0.117788	0.317387	-0.112321
2_UPTAG1073	2	YMR136W	GAT2	UPTAG1073	0.0724857	0.0280372	0.0725973	-0.0687244
2_UPTAG1074	2	YLR013W	GAT3	UPTAG1074	-0.0559008	0.203229	0.101186	0.078236
2_UPTAG1075	2	YIR013C	GAT4	UPTAG1075	-0.177579	0.136975	-0.0676828	0.0111281
2_UPTAG1076	2	YMR228W	MTF1	UPTAG1076	-0.0112079	-0.165931	-0.210798	0.231081
2_UPTAG1078	2	YDR156W	RPA14	UPTAG1078	0.294886	-0.192612	0.0839401	0.0968249
2_UPTAG1080	2	YJL148W	RPA34	UPTAG1080	0.295683	0.0190499	0.271188	0.038282
2_UPTAG1082	2	YOR295W	UAF30	UPTAG1082	0.696153	0.0277746	0.643202	0.594116
2_UPTAG1084	2	YOL051W	GAL11	UPTAG1084	0.807388	-0.156897	0.60199	-0.130205
2_UPTAG1085	2	YPR070W	MED1	UPTAG1085	-0.0453432	-0.212214	-0.284352	0.0219726
2_UPTAG1086	2	YDL005C	MED2	UPTAG1086	0.646193	-0.115049	0.502046	-0.24774
2_UPTAG1087	2	YGL025C	PGD1	UPTAG1087	0.631446	-0.261807	0.344769	-0.384273
2_UPTAG1088	2	YNL236W	SIN4	UPTAG1088	0.150165	0.0294598	0.151142	-0.350621
2_UPTAG1089	2	YHR041C	SRB2	UPTAG1089	0.765089	-0.115276	0.477626	0.842207
2_UPTAG1092	2	YOR123C	LEO1	UPTAG1092	-0.489413	-0.015679	-0.540924	0.049721
2_UPTAG1093	2	YGL244W	RTF1	UPTAG1093	-3.03154	0.738233	-2.30179	-0.272975
2_UPTAG1094	2	YOL145C	CTR9	UPTAG1094	-0.0301454	-0.144024	-0.205022	0.152514
2_UPTAG1096	2	YKR099W	BAS1	UPTAG1096	0.796563	-0.290551	0.461019	0.333694
2_UPTAG1097	2	YNR010W	CSE2	UPTAG1097	0.0961552	-0.168479	-0.110786	0.215256
2_UPTAG1099	2	YPL047W	SGF11	UPTAG1099	1.08032	-0.265234	0.787083	0.123063
2_UPTAG1100	2	YBL103C	RTG3	UPTAG1100	-0.00812106	0.361691	0.321108	-0.00111137
2_UPTAG1101	2	YER045C	ACA1	UPTAG1101	-0.13776	0.103402	-0.0643666	0.0330314
2_UPTAG1102	2	YPR008W	HAA1	UPTAG1102	0.0847276	-0.255997	-0.200101	-0.0311582
2_UPTAG1103	2	YNL257C	SIP3	UPTAG1103	-0.111865	0.274408	0.0898316	0.0957847
2_UPTAG1105	2	YGL166W	CUP2	UPTAG1105	0.0549667	0.0650401	0.0813886	-0.0366052
2_UPTAG1106	2	YIL036W	CST6	UPTAG1106	0.35682	-0.105929	0.227847	-0.0527666
2_UPTAG1107	2	YPL177C	CUP9	UPTAG1107	-0.540822	0.386002	-0.209756	-0.115064
2_UPTAG1108	2	YCR065W	HCM1	UPTAG1108	0.162689	0.08382	0.217783	0.00298778
2_UPTAG1109	2	YOL089C	HAL9	UPTAG1109	-0.0549382	0.215987	0.136937	0.181865
2_UPTAG1110	2	YFL021W	GAT1	UPTAG1110	-0.220919	0.136836	-0.107019	0.00949228
2_UPTAG1112	2	YPL202C	AFT2	UPTAG1112	0.152264	0.0185757	0.142242	-0.0566119
2_UPTAG1113	2	YNL314W	DAL82	UPTAG1113	0.223849	0.0375143	0.230474	-0.00149924
2_UPTAG1114	2	YOR179C	SYC1	UPTAG1114	-0.380223	0.225434	-0.201305	0.129756
2_UPTAG1115	2	YDR216W	ADR1	UPTAG1115	-0.0145129	0.135144	0.0929921	-0.142429
2_UPTAG1117	2	YKR034W	DAL80	UPTAG1117	0.0785202	0.0126951	0.0348207	0.259158
2_UPTAG1119	2	YHR178W	STB5	UPTAG1119	0.402765	-0.253594	0.116517	-0.104815
2_UPTAG1121	2	YKL109W	HAP4	UPTAG1121	-0.259916	0.0174353	-0.271955	-0.0210975
2_UPTAG1122	2	YGL237C	HAP2	UPTAG1122	-0.216994	0.240398	-0.0140546	-0.1555
2_UPTAG1123	2	YBL021C	HAP3	UPTAG1123	-0.459471	0.169358	-0.315588	0.100616
2_UPTAG1124	2	YOR358W	HAP5	UPTAG1124	0.0289896	-0.149015	-0.152988	0.0608529
2_UPTAG1125	2	YER063W	THO1	UPTAG1125	-0.110297	0.109226	-0.0291138	-0.0224595
2_UPTAG1126	2	YMR012W	CLU1	UPTAG1126	-0.441159	0.129866	-0.340747	-0.0260132
2_UPTAG1127	2	YPL119C	DBP1	UPTAG1127	0.0943648	-0.00354266	0.0569542	-0.0228715
2_UPTAG1129	2	YKL054C	DEF1	UPTAG1129	0.480304	0.733857	0.736839	-0.0316549
2_UPTAG1130	2	YDR143C	SAN1	UPTAG1130	0.192238	-0.0607425	0.102173	-0.0386901
2_UPTAG1131	2	YNL085W	MKT1	UPTAG1131	0.0262239	-0.124858	-0.121995	-0.0463311
2_UPTAGbre1KO	2	BRE1_Plate2	BRE1	UPTAGbre1KO	-2.85239	0.322528	-2.57671	-0.161814
2_UPTAGdot1KO	2	DOT1_Plate2	DOT1	UPTAGdot1KO	1.07221	-2.69484	-2.28948	-0.0501979
2_UPTAGDot1OE	2	DOT1OE_Plate2	DOT1OE	UPTAGDot1OE	3.87395	-1.66795	2.18478	0.154937
3_UPTAG0001	3	YDR534C	FIT1	UPTAG0001	0.420251	-0.0829625	0.309429	0.00534391
3_UPTAG0002	3	YOR382W	FIT2	UPTAG0002	0.0341804	-0.117755	-0.0894611	0.0166102
3_UPTAG0003	3	YOR383C	FIT3	UPTAG0003	0.0362125	-0.145975	-0.133993	0.0868225
3_UPTAG0004	3	YJR150C	DAN1	UPTAG0004	-0.0969128	0.0029664	-0.105502	-0.0147647
3_UPTAG0005	3	YPL163C	SVS1	UPTAG0005	0.0800158	-0.0316818	0.0362142	0.0906324
3_UPTAG0006	3	YFL010W-A	AUA1	UPTAG0006	0.0144201	0.416051	0.306223	-0.348007
3_UPTAG0007	3	YBR235W	VHC1	UPTAG0007	0.0218464	-0.0849866	-0.0923692	-0.0818316
3_UPTAG0008	3	YBL086C	YBL086C	UPTAG0008	-0.357449	0.112112	-0.266978	0.0424143
3_UPTAG0009	3	YGR201C	YGR201C	UPTAG0009	0.325865	0.185384	0.495781	-0.000367837
3_UPTAG0010	3	YMR279C	YMR279C	UPTAG0010	0.181123	-0.0177303	0.156792	0.248257
3_UPTAG0011	3	YCR045C	RRT12	UPTAG0011	0.0105363	0.0911112	0.0822484	0.0551909
3_UPTAG0012	3	YIL170W	HXT12	UPTAG0012	0.186713	-0.147866	0.0270058	0.056039
3_UPTAG0013	3	YJL165C	HAL5	UPTAG0013	0.137818	-0.217459	-0.0969931	0.383318
3_UPTAG0014	3	YIL009W	FAA3	UPTAG0014	0.159708	-0.151199	-0.00566449	0.0364074
3_UPTAG0015	3	YKL198C	PTK1	UPTAG0015	-0.208472	0.40046	0.161526	-0.0757243
3_UPTAG0016	3	YLL019C	KNS1	UPTAG0016	-0.271246	-0.141875	-0.421932	0.136788
3_UPTAG0017	3	YPR200C	ARR2	UPTAG0017	-0.641327	0.0358082	-0.630675	0.015876
3_UPTAG0018	3	YDR277C	MTH1	UPTAG0018	-0.286876	0.0581478	-0.256601	0.160861
3_UPTAG0019	3	YPL244C	HUT1	UPTAG0019	-0.266387	0.00713414	-0.282812	0.143414
3_UPTAG0020	3	YEL062W	NPR2	UPTAG0020	0.079119	-0.036937	0.0310837	0.0239221
3_UPTAG0021	3	YIR036C	IRC24	UPTAG0021	-0.454535	0.114582	-0.351984	-0.0732741
3_UPTAG0022	3	YOR267C	HRK1	UPTAG0022	-0.343465	0.173872	-0.187011	-0.10059
3_UPTAG0023	3	YPL026C	SKS1	UPTAG0023	-0.253548	-0.0965945	-0.361651	0.0807754
3_UPTAG0025	3	YNL264C	PDR17	UPTAG0025	-0.166417	-0.168491	-0.361615	0.0364785
3_UPTAG0026	3	YMR216C	SKY1	UPTAG0026	0.231734	-0.117777	0.0748188	-0.271179
3_UPTAG0027	3	YOR031W	CRS5	UPTAG0027	-0.45661	0.648901	0.177068	-0.271695
3_UPTAG0028	3	YGR088W	CTT1	UPTAG0028	-0.217474	0.00555817	-0.22961	-0.0575305
3_UPTAG0029	3	YPL226W	NEW1	UPTAG0029	-0.132226	0.0926649	-0.0530098	-0.17522
3_UPTAG0031	3	YNL077W	APJ1	UPTAG0031	-0.0164411	0.336058	0.271835	-0.11274
3_UPTAG0033	3	YDR515W	SLF1	UPTAG0033	0.0756626	-0.160561	-0.0941281	0.0896098
3_UPTAG0034	3	YJR049C	UTR1	UPTAG0034	0.8272	-0.080301	0.732321	0.269512
3_UPTAG0035	3	YGL227W	VID30	UPTAG0035	0.3281	-0.00774902	0.305921	-0.0357145
3_UPTAG0036	3	YDL125C	HNT1	UPTAG0036	0.00723484	0.0445094	0.038088	-0.0737789
3_UPTAG0039	3	YMR186W	HSC82	UPTAG0039	-0.0880883	-0.148264	-0.2478	-0.0967593
3_UPTAG0040	3	YCR011C	ADP1	UPTAG0040	0.0711594	-0.110762	-0.052157	0.0231022
3_UPTAG0041	3	YKL213C	DOA1	UPTAG0041	-0.483353	-0.098562	-0.593366	0.207891
3_UPTAG0042	3	YBR173C	UMP1	UPTAG0042	-0.0465966	0.0447338	0.00711116	0.483443
3_UPTAG0046	3	YMR038C	CCS1	UPTAG0046	1.25179	-0.456093	0.728093	0.176437
3_UPTAG0047	3	YJL145W	SFH5	UPTAG0047	-0.101351	0.274699	0.160749	-0.118914
3_UPTAG0048	3	YLR043C	TRX1	UPTAG0048	0.38914	-0.126125	0.250736	0.0469828
3_UPTAG0049	3	YGR209C	TRX2	UPTAG0049	0.223562	0.0488529	0.259385	-0.0331409
3_UPTAG0051	3	YLL055W	YCT1	UPTAG0051	-0.174168	-0.0390095	-0.225439	0.0785777
3_UPTAG0052	3	YKL008C	LAC1	UPTAG0052	0.116192	-0.205116	-0.100631	0.1906
3_UPTAG0054	3	YHR123W	EPT1	UPTAG0054	0.0370293	-0.0559659	-0.0341684	-0.109267
3_UPTAG0055	3	YNR039C	ZRG17	UPTAG0055	-0.391716	0.11888	-0.284535	0.0624322
3_UPTAG0056	3	YBR132C	AGP2	UPTAG0056	-0.309109	0.0603528	-0.261151	0.0237582
3_UPTAG0057	3	YNL291C	MID1	UPTAG0057	0.0778749	0.0863676	0.151751	-0.127651
3_UPTAG0058	3	YLR205C	HMX1	UPTAG0058	0.105634	-0.476748	-0.387866	0.473199
3_UPTAG0059	3	YLR242C	ARV1	UPTAG0059	1.07047	-0.279473	0.784905	0.347736
3_UPTAG0060	3	YEL065W	SIT1	UPTAG0060	-0.38279	0.706297	0.308283	-0.556043
3_UPTAG0061	3	YHL040C	ARN1	UPTAG0061	-0.119108	-0.0253423	-0.156675	-0.0592507
3_UPTAG0063	3	YKL174C	TPO5	UPTAG0063	-0.226212	0.540212	0.289464	-0.286603
3_UPTAG0064	3	YOR079C	ATX2	UPTAG0064	-0.176227	0.0416287	-0.151046	-0.0268051
3_UPTAG0065	3	YDR270W	CCC2	UPTAG0065	0.145541	-0.141418	-0.00626551	-0.0227209
3_UPTAG0066	3	YJR040W	GEF1	UPTAG0066	-0.148236	-0.178742	-0.337507	0.133087
3_UPTAG0067	3	YBR036C	CSG2	UPTAG0067	0.153666	-0.0797619	0.0533096	0.10365
3_UPTAG0068	3	YAL058W	CNE1	UPTAG0068	1.8663	-0.635226	0.953674	0.24405
3_UPTAG0069	3	YER060W	FCY21	UPTAG0069	0.0484817	-0.166004	-0.149047	0.00989616
3_UPTAG0070	3	YER060W-A	FCY22	UPTAG0070	-0.13884	-0.0869146	-0.240894	0.0724724
3_UPTAG0071	3	YHR048W	YHK8	UPTAG0071	-0.287889	-0.123168	-0.418226	-0.0679858
3_UPTAG0072	3	YCR075C	ERS1	UPTAG0072	-0.211316	0.70481	0.413388	-0.653846
3_UPTAG0075	3	YKR039W	GAP1	UPTAG0075	0.629442	-0.597571	-0.180778	0.187679
3_UPTAG0077	3	YLR411W	CTR3	UPTAG0077	-0.123895	-0.211266	-0.347347	0.119277
3_UPTAG0078	3	YGL255W	ZRT1	UPTAG0078	-0.124308	-0.0932777	-0.236364	0.328519
3_UPTAG0079	3	YMR319C	FET4	UPTAG0079	0.39118	-0.387337	-0.00363199	0.0309641
3_UPTAG0080	3	YIL121W	QDR2	UPTAG0080	0.633972	-0.548951	-0.091871	-0.169477
3_UPTAG0081	3	YPR194C	OPT2	UPTAG0081	-0.23761	-0.020787	-0.271373	0.0680908
3_UPTAG0082	3	YML123C	PHO84	UPTAG0082	0.486578	-0.21026	0.252936	-0.248333
3_UPTAG0084	3	YBR008C	FLR1	UPTAG0084	-0.0776534	0.200981	0.114002	-0.0505628
3_UPTAG0085	3	YGR055W	MUP1	UPTAG0085	-0.249029	-0.104791	-0.379627	0.0793196
3_UPTAG0086	3	YHL036W	MUP3	UPTAG0086	1.41604	-0.780968	0.380354	0.598309
3_UPTAG0088	3	YGL084C	GUP1	UPTAG0088	1.16155	-0.308127	0.838011	0.0081427
3_UPTAG0089	3	YBR295W	PCA1	UPTAG0089	0.359655	-0.209745	0.148025	0.0890344
3_UPTAG0090	3	YKL064W	MNR2	UPTAG0090	0.239107	-0.1107	0.108684	0.0374329
3_UPTAG0091	3	YDR497C	ITR1	UPTAG0091	-0.309363	0.0858228	-0.235448	0.108141
3_UPTAG0092	3	YOL103W	ITR2	UPTAG0092	-0.070171	-0.0696335	-0.142668	-0.0230039
3_UPTAG0094	3	YJL198W	PHO90	UPTAG0094	1.95747	-0.670414	1.24324	0.367058
3_UPTAG0096	3	YGR197C	SNG1	UPTAG0096	-0.188761	-0.0684617	-0.266363	0.150191
3_UPTAG0097	3	YIL013C	PDR11	UPTAG0097	-0.0235734	0.0316922	-0.0209378	-0.076205
3_UPTAG0098	3	YKR103W	NFT1	UPTAG0098	-0.0898751	0.0329508	-0.108597	0.138943
3_UPTAG0099	3	YKR104W	YKR104W	UPTAG0099	-0.0767854	0.288862	0.190535	-0.0108565
3_UPTAG0100	3	YOL075C	YOL075C	UPTAG0100	-0.0799539	0.0897825	-0.00110726	0.0728561
3_UPTAG0101	3	YAL067C	SEO1	UPTAG0101	-0.134066	-0.0844984	-0.235112	0.135798
3_UPTAG0102	3	YCL073C	GEX1	UPTAG0102	-0.15437	0.334883	0.125282	-0.0705038
3_UPTAG0103	3	YKR106W	GEX2	UPTAG0103	-0.295938	0.0414084	-0.266598	-0.0324194
3_UPTAG0104	3	YOR071C	NRT1	UPTAG0104	0.0571435	0.0661083	0.110413	-0.189369
3_UPTAG0105	3	YOR192C	THI72	UPTAG0105	-0.0157523	0.283018	0.264821	-0.0183343
3_UPTAG0106	3	YDL054C	MCH1	UPTAG0106	-0.113832	0.0355781	-0.0894789	0.17602
3_UPTAG0107	3	YKL221W	MCH2	UPTAG0107	-0.0828075	-0.00121542	-0.0885152	-0.157274
3_UPTAG0108	3	YOR306C	MCH5	UPTAG0108	0.413025	-0.244382	0.15725	0.0738562
3_UPTAG0109	3	YJL036W	SNX4	UPTAG0109	-0.107217	-0.15421	-0.270913	0.180581
3_UPTAG0110	3	YBR298C	MAL31	UPTAG0110	0.304804	-0.213993	0.0795283	-0.141872
3_UPTAG0111	3	YGR289C	MAL11	UPTAG0111	0.472937	-0.210415	0.251706	0.182422
3_UPTAG0112	3	YLR220W	CCC1	UPTAG0112	-0.0634776	-0.0966359	-0.167141	0.190904
3_UPTAG0113	3	YAL022C	FUN26	UPTAG0113	0.529754	-0.293921	0.215339	0.350027
3_UPTAG0114	3	YPR037C	ERV2	UPTAG0114	-0.00184703	0.0885833	0.0746058	0.027638
3_UPTAG0115	3	YHR002W	LEU5	UPTAG0115	-0.306338	-0.0988181	-0.422901	0.142313
3_UPTAG0116	3	YJR095W	SFC1	UPTAG0116	-0.0322613	-0.0271954	-0.0859651	0.0728023
3_UPTAG0118	3	YPR021C	AGC1	UPTAG0118	0.218004	-0.105131	0.0975222	-0.117161
3_UPTAG0119	3	YBR291C	CTP1	UPTAG0119	0.152762	-0.0651943	0.0744401	0.0743336
3_UPTAG0120	3	YER154W	OXA1	UPTAG0120	0.302127	-0.189196	0.109054	0.146484
3_UPTAG0121	3	YPL060W	MFM1	UPTAG0121	0.0615907	-0.0637372	-0.0143045	0.124193
3_UPTAG0122	3	YOR334W	MRS2	UPTAG0122	-0.307142	0.307561	-0.0324891	0.233462
3_UPTAG0123	3	YOR222W	ODC2	UPTAG0123	-0.0347578	-0.0998092	-0.161761	0.0238878
3_UPTAG0124	3	YLR188W	MDL1	UPTAG0124	0.0647212	0.0948402	0.13295	-0.0349766
3_UPTAG0125	3	YKL120W	OAC1	UPTAG0125	-0.113071	0.16102	0.0282483	-0.0590416
3_UPTAG0126	3	YDL119C	HEM25	UPTAG0126	0.12746	0.0842864	0.19952	-0.0175186
3_UPTAG0127	3	YEL006W	YEA6	UPTAG0127	0.00146325	-0.00801522	-0.0206617	0.132751
3_UPTAG0129	3	YPR058W	YMC1	UPTAG0129	0.232113	-0.258971	-0.0390224	-0.187353
3_UPTAG0130	3	YBR104W	YMC2	UPTAG0130	-0.268383	-0.137155	-0.423722	0.139659
3_UPTAG0131	3	YMR166C	MME1	UPTAG0131	0.484596	-0.456666	0.0145347	0.329194
3_UPTAG0132	3	YPR011C	YPR011C	UPTAG0132	-0.0405794	0.192979	0.138556	-0.00954143
3_UPTAG0133	3	YNL083W	SAL1	UPTAG0133	0.143196	-0.105499	0.020939	-0.0249862
3_UPTAG0134	3	YIL006W	YIA6	UPTAG0134	0.183238	-0.126633	0.0477113	-0.0380848
3_UPTAG0135	3	YMR241W	YHM2	UPTAG0135	0.108746	-0.265633	-0.167085	0.33972
3_UPTAG0136	3	YGR096W	TPC1	UPTAG0136	0.171769	0.0137546	0.174515	0.0594767
3_UPTAG0137	3	YPR067W	ISA2	UPTAG0137	0.826267	-0.205957	0.58574	0.00924006
3_UPTAG0138	3	YJR135W-A	TIM8	UPTAG0138	0.0306828	0.174224	0.178657	-0.0957688
3_UPTAG0139	3	YGR181W	TIM13	UPTAG0139	-0.216057	0.16538	-0.0616563	0.0197275
3_UPTAG0141	3	YKL040C	NFU1	UPTAG0141	-0.0841533	0.0821211	-0.0173665	-0.0761655
3_UPTAG0142	3	YOR226C	ISU2	UPTAG0142	-0.0622161	0.33148	0.242315	-0.16689
3_UPTAG0143	3	YLL027W	ISA1	UPTAG0143	0.0398956	-0.0211747	-0.00201912	0.0798329
3_UPTAG0144	3	YFL036W	RPO41	UPTAG0144	0.260078	-0.432296	-0.198621	0.337655
3_UPTAG0146	3	YLR348C	DIC1	UPTAG0146	-0.0467141	0.015037	-0.089581	-0.0367667
3_UPTAG0147	3	YJL112W	MDV1	UPTAG0147	0.0716375	-0.278213	-0.218737	0.0223685
3_UPTAG0148	3	YGR028W	MSP1	UPTAG0148	0.00469092	0.314486	0.286629	-0.106928
3_UPTAG0149	3	YDR470C	UGO1	UPTAG0149	0.775407	-0.0423156	0.704892	0.315535
3_UPTAG0151	3	YOR045W	TOM6	UPTAG0151	0.330551	-0.0465402	0.272074	0.194543
3_UPTAG0152	3	YNL070W	TOM7	UPTAG0152	0.511308	0.0567392	0.553221	-0.192262
3_UPTAG0153	3	YNL121C	TOM70	UPTAG0153	-0.316967	0.196841	-0.161473	0.109179
3_UPTAG0154	3	YIL134W	FLX1	UPTAG0154	0.0491943	0.10314	0.129195	0.072035
3_UPTAG0155	3	YKL134C	OCT1	UPTAG0155	0.863287	-0.507919	0.340144	0.140616
3_UPTAG0156	3	YOR037W	CYC2	UPTAG0156	-0.00761019	-0.10281	-0.127256	0.0817016
3_UPTAG0157	3	YER053C	PIC2	UPTAG0157	-0.284413	0.0974579	-0.213036	0.0316259
3_UPTAG0158	3	YDR046C	BAP3	UPTAG0158	0.0302355	-0.00483909	0.0119447	-0.0323717
3_UPTAG0162	3	YNL318C	HXT14	UPTAG0162	0.067394	-0.107964	-0.0810386	0.150184
3_UPTAG0163	3	YFL011W	HXT10	UPTAG0163	-0.0970606	0.329886	0.191359	-0.081942
3_UPTAG0165	3	YDR342C	HXT7	UPTAG0165	-0.133738	-0.103016	-0.244914	-0.0310815
3_UPTAG0166	3	YIL114C	POR2	UPTAG0166	-0.0606758	0.0215399	-0.0509254	-0.046341
3_UPTAG0167	3	YMR177W	MMT1	UPTAG0167	-0.326968	0.303636	-0.0332403	-0.0808358
3_UPTAG0168	3	YPL224C	MMT2	UPTAG0168	-0.0521866	0.0759078	0.0127908	-0.105088
3_UPTAG0169	3	YPL135W	ISU1	UPTAG0169	-0.259203	0.321489	0.0504806	-0.0550802
3_UPTAG0170	3	YKL217W	JEN1	UPTAG0170	0.199181	0.288678	0.494584	-0.0448707
3_UPTAG0171	3	YOR317W	FAA1	UPTAG0171	0.272133	0.234218	0.558823	-0.00660342
3_UPTAG0172	3	YER015W	FAA2	UPTAG0172	-0.220533	0.116546	-0.11907	-0.168361
3_UPTAG0173	3	YHR050W	SMF2	UPTAG0173	0.0269163	0.259382	0.270194	-0.183296
3_UPTAG0174	3	YPL134C	ODC1	UPTAG0174	0.0995211	-0.199823	-0.13149	0.0302856
3_UPTAG0175	3	YJL094C	KHA1	UPTAG0175	-0.118008	0.00284804	-0.143548	0.0862099
3_UPTAG0176	3	YGR260W	TNA1	UPTAG0176	-0.0367561	0.275492	0.227474	-0.087004
3_UPTAG0177	3	YDR256C	CTA1	UPTAG0177	-0.273261	0.168988	-0.113768	-0.180505
3_UPTAG0178	3	YJR077C	MIR1	UPTAG0178	0.186376	-0.186114	-0.010612	0.103498
3_UPTAG0180	3	YEL030W	ECM10	UPTAG0180	-0.215746	0.222112	-0.00542522	-0.0407179
3_UPTAG0182	3	YDR011W	SNQ2	UPTAG0182	-0.219192	0.0857893	-0.147978	-0.00217733
3_UPTAG0185	3	YOR011W	AUS1	UPTAG0185	-0.236642	0.151535	-0.106215	0.136864
3_UPTAG0186	3	YNR070W	PDR18	UPTAG0186	0.0742442	-0.0422537	0.0216676	-0.127651
3_UPTAG0187	3	YNR055C	HOL1	UPTAG0187	-0.379673	0.0093296	-0.391457	0.0733845
3_UPTAG0188	3	YNL125C	ESBP6	UPTAG0188	0.241871	0.0465028	0.275004	-0.0913863
3_UPTAG0190	3	YNR002C	ATO2	UPTAG0190	-0.397155	0.182938	-0.229161	0.0172627
3_UPTAG0192	3	YGR257C	MTM1	UPTAG0192	1.23219	-0.423089	0.795983	0.193015
3_UPTAG0193	3	YOR316C	COT1	UPTAG0193	0.261398	0.233405	0.486539	0.118926
[truncated: 2,269 more rows]

## Sheet: DownTag_meanlog2
	Plate	ORF	Gene	TAG	K79me3_over_K79me1	K79me1_over_H3	K79me3_over_H3	H3_over_input
1_DNTAG0001	1	YOR094W	ARF3	DNTAG0001	0.386446	0.134501	0.516643	0.152345
1_DNTAG0003	1	YDL161W	ENT1	DNTAG0003	0.0373493	0.110626	0.137215	0.198804
1_DNTAG0004	1	YLR206W	ENT2	DNTAG0004	0.00741524	-0.0741381	-0.0747637	-0.00483259
1_DNTAG0005	1	YLL038C	ENT4	DNTAG0005	0.00586008	0.283796	0.278398	-0.266144
1_DNTAG0006	1	YHR016C	YSC84	DNTAG0006	0.0254446	0.208373	0.224844	0.0128663
1_DNTAG0008	1	YNL293W	MSB3	DNTAG0008	-0.277629	0.288559	0.0260918	0.181881
1_DNTAG0009	1	YCL034W	LSB5	DNTAG0009	-0.0839527	-0.0326852	-0.126401	0.236608
1_DNTAG0010	1	YBR128C	ATG14	DNTAG0010	0.0527378	0.0355691	0.0711002	-0.371379
1_DNTAG0011	1	YMR159C	ATG16	DNTAG0011	-0.00963956	0.0460951	0.0311939	0.0531814
1_DNTAG0012	1	YPL100W	ATG21	DNTAG0012	-0.0640216	-0.00777429	-0.0844362	-0.0776235
1_DNTAG0013	1	YCR068W	ATG15	DNTAG0013	-0.129318	0.0053384	-0.128594	-0.0518442
1_DNTAG0014	1	YOL007C	CSI2	DNTAG0014	0.0237263	-0.155506	-0.140567	0.133778
1_DNTAG0015	1	YER150W	SPI1	DNTAG0015	-0.169727	0.209108	0.0266424	-0.178413
1_DNTAG0016	1	YIR039C	YPS6	DNTAG0016	-0.343215	0.349318	0.00177683	-0.368457
1_DNTAG0017	1	YOR034C	AKR2	DNTAG0017	-0.0209754	0.0339506	0.00180248	-0.0299075
1_DNTAG0018	1	YHR057C	CPR2	DNTAG0018	0.0617506	0.0891165	0.117236	-0.141514
1_DNTAG0019	1	YLR361C	DCR2	DNTAG0019	-0.134166	0.188912	0.0441469	-0.0212696
1_DNTAG0020	1	YER039C	HVG1	DNTAG0020	-0.0825396	-0.00287966	-0.10386	-0.0916249
1_DNTAG0021	1	YJL223C	PAU1	DNTAG0021	-0.106351	0.0961398	-0.0479206	-0.311144
1_DNTAG0022	1	YEL049W	PAU2	DNTAG0022	0.0520262	0.254185	0.295941	-0.080719
1_DNTAG0023	1	YCR104W	PAU3	DNTAG0023	-0.33416	0.128003	-0.231964	0.135849
1_DNTAG0024	1	YLR461W	PAU4	DNTAG0024	0.0853064	-0.0210764	0.0510073	0.0413298
1_DNTAG0025	1	YFL020C	PAU5	DNTAG0025	-0.0831947	0.107182	0.0142617	-0.13462
1_DNTAG0027	1	YKR098C	UBP11	DNTAG0027	-0.232137	0.0362373	-0.19288	-0.187996
1_DNTAG0028	1	YDL206W	YDL206W	DNTAG0028	0.172631	-0.315841	-0.145359	0.467185
1_DNTAG0029	1	YFL040W	YFL040W	DNTAG0029	0.164145	-0.298395	-0.155217	0.269506
1_DNTAG0030	1	YFR018C	YFR018C	DNTAG0030	0.125574	-0.0258614	0.061555	0.109906
1_DNTAG0031	1	YGL081W	YGL081W	DNTAG0031	-0.042684	0.049105	-0.130595	-0.131523
1_DNTAG0032	1	YLR057W	MNL2	DNTAG0032	-0.0820589	0.0864861	-0.0048635	0.0544417
1_DNTAG0033	1	YNR071C	YNR071C	DNTAG0033	-0.169064	0.0331884	-0.14519	0.167576
1_DNTAG0034	1	YPR084W	YPR084W	DNTAG0034	-0.233083	0.113339	-0.132308	0.0718102
1_DNTAG0035	1	YGL259W	YPS5	DNTAG0035	-0.192865	0.106522	-0.106359	0.0764015
1_DNTAG0036	1	YMR237W	BCH1	DNTAG0036	-0.16029	0.17804	0.00785543	0.0582136
1_DNTAG0037	1	YGL083W	SCY1	DNTAG0037	0.186242	0.0137891	0.173781	-0.112453
1_DNTAG0038	1	YMR071C	TVP18	DNTAG0038	-0.122845	0.0321447	-0.0952604	-0.0278727
1_DNTAG0039	1	YBL010C	YBL010C	DNTAG0039	0.064432	-0.182478	-0.122688	-0.109013
1_DNTAG0041	1	YHL017W	YHL017W	DNTAG0041	-0.0046218	-0.012958	-0.0356585	0.0318115
1_DNTAG0042	1	YJL207C	LAA1	DNTAG0042	-0.17444	0.381856	0.197755	-0.477235
1_DNTAG0044	1	YOL137W	BSC6	DNTAG0044	0.0785744	0.0265692	0.0910845	0.0127666
1_DNTAG0045	1	YDR100W	TVP15	DNTAG0045	0.0978502	-0.28308	-0.191502	0.158822
1_DNTAG0046	1	YER101C	AST2	DNTAG0046	0.0256038	-0.151996	-0.134073	0.0898114
1_DNTAG0047	1	YDR371W	CTS2	DNTAG0047	-0.234131	0.240935	-0.00340024	-0.0289222
1_DNTAG0048	1	YDR084C	TVP23	DNTAG0048	-0.213318	-0.023944	-0.246236	0.0993725
1_DNTAG0049	1	YKR088C	TVP38	DNTAG0049	-0.0119683	-0.0240679	-0.0471111	0.0336991
1_DNTAG0050	1	YEL005C	VAB2	DNTAG0050	-0.0118231	0.0154492	-0.00580673	0.229482
1_DNTAG0051	1	YBL104C	SEA4	DNTAG0051	0.00375155	-0.0660165	-0.0723438	0.0990615
1_DNTAG0052	1	YIR035C	YIR035C	DNTAG0052	-0.248391	0.205315	-0.0506586	-0.0721663
1_DNTAG0053	1	YOR112W	CEX1	DNTAG0053	-0.0272119	0.0331422	-0.00670256	0.197982
1_DNTAG0054	1	YCR082W	AHC2	DNTAG0054	0.312392	-0.178192	0.129558	-1.04843
1_DNTAG0055	1	YDR304C	CPR5	DNTAG0055	0.00761652	0.0240055	0.0159865	0.0993515
1_DNTAG0056	1	YML101C	CUE4	DNTAG0056	-0.329791	0.383425	0.0482144	0.0323835
1_DNTAG0057	1	YGR223C	HSV2	DNTAG0057	0.024372	0.0610416	0.0752658	0.216061
1_DNTAG0058	1	YLR351C	NIT3	DNTAG0058	-0.0356352	-0.0202427	-0.0652724	0.0864205
1_DNTAG0059	1	YJL123C	MTC1	DNTAG0059	-0.0140264	0.0285378	0.00432497	-0.0518989
1_DNTAG0060	1	YJR015W	YJR015W	DNTAG0060	0.0744381	0.00699699	0.059639	0.0309009
1_DNTAG0061	1	YPL105C	SYH1	DNTAG0061	-0.143474	0.363733	0.162236	-0.113796
1_DNTAG0062	1	YDR349C	YPS7	DNTAG0062	0.365736	-0.314654	0.0448355	0.0301249
1_DNTAG0063	1	YDR411C	DFM1	DNTAG0063	0.295726	0.0428145	0.326353	-0.201346
1_DNTAG0064	1	YFR041C	ERJ5	DNTAG0064	-0.00370853	-0.0254273	-0.0383668	0.143244
1_DNTAG0065	1	YJR118C	ILM1	DNTAG0065	0.215295	0.00910168	0.21274	0.28267
1_DNTAG0067	1	YNL156C	NSG2	DNTAG0067	0.209678	-0.0433212	0.149406	-0.0366636
1_DNTAG0068	1	YMR123W	PKR1	DNTAG0068	0.025595	0.0285583	0.044058	-0.175121
1_DNTAG0069	1	YDL204W	RTN2	DNTAG0069	-0.135211	0.312537	0.166437	-0.0574412
1_DNTAG0070	1	YHR181W	SVP26	DNTAG0070	0.128375	0.15919	0.280165	-0.0893627
1_DNTAG0071	1	YBR273C	UBX7	DNTAG0071	-0.270883	0.315718	0.0377096	0.0077285
1_DNTAG0072	1	YBR096W	YBR096W	DNTAG0072	-0.0986635	0.197068	-0.00216368	-0.33791
1_DNTAG0073	1	YCL045C	EMC1	DNTAG0073	0.371676	0.199565	0.560713	-0.058393
1_DNTAG0075	1	YDR221W	GTB1	DNTAG0075	0.23226	-0.0637993	0.158926	0.0782415
1_DNTAG0076	1	YDR307W	PMT7	DNTAG0076	0.0665346	0.278969	0.339826	-0.277425
1_DNTAG0077	1	YDR476C	YDR476C	DNTAG0077	-0.0585683	0.154292	0.0882297	-0.12035
1_DNTAG0078	1	YEL001C	IRC22	DNTAG0078	0.109707	-0.0105068	0.0801908	0.00480049
1_DNTAG0080	1	YER053C-A	YER053C-A	DNTAG0080	0.121952	0.143415	0.249207	-0.206934
1_DNTAG0081	1	YKL065C	YET1	DNTAG0081	0.0439256	0.0691768	0.102609	0.018804
1_DNTAG0083	1	YGL010W	MPO1	DNTAG0083	-0.0259846	-0.274622	-0.308682	0.349126
1_DNTAG0084	1	YGL231C	EMC4	DNTAG0084	-0.107246	0.260089	0.145525	-0.214498
1_DNTAG0085	1	YGR263C	SAY1	DNTAG0085	0.0876005	-0.19951	-0.127392	0.128887
1_DNTAG0086	1	YHR045W	YHR045W	DNTAG0086	0.190105	-0.191446	-0.0106496	0.065093
1_DNTAG0087	1	YIL039W	TED1	DNTAG0087	0.147321	-0.0507034	0.0720234	0.0737032
1_DNTAG0088	1	YJR088C	EMC2	DNTAG0088	0.16327	0.187254	0.340109	-0.164268
1_DNTAG0089	1	YLL014W	EMC6	DNTAG0089	0.112835	-0.0375114	0.0655052	0.0491013
1_DNTAG0090	1	YLL023C	POM33	DNTAG0090	-0.0924397	-0.0320282	-0.133234	0.171582
1_DNTAG0091	1	YLR050C	YLR050C	DNTAG0091	-0.0276178	0.135651	0.0996641	-0.0133586
1_DNTAG0092	1	YLR064W	PER33	DNTAG0092	0.513066	-0.301241	0.195054	0.41266
1_DNTAG0093	1	YNL046W	YNL046W	DNTAG0093	0.170851	-0.0184731	0.14312	0.137371
1_DNTAG0094	1	YNL146W	YNL146W	DNTAG0094	0.0834865	-0.107446	-0.0355235	0.160736
1_DNTAG0095	1	YNR021W	YNR021W	DNTAG0095	0.162167	-0.0936148	0.0676777	0.00523648
1_DNTAG0096	1	YOR044W	IRC23	DNTAG0096	-0.0383546	-0.0657135	-0.102002	-0.185319
1_DNTAG0098	1	YPL207W	TYW1	DNTAG0098	0.0360874	-0.0224564	0.00388287	0.0392819
1_DNTAG0099	1	YPR003C	YPR003C	DNTAG0099	0.237297	-0.23663	-0.0100966	0.0483081
1_DNTAG0100	1	YPR063C	YPR063C	DNTAG0100	0.271244	0.120991	0.380225	-0.20577
1_DNTAG0101	1	YPR091C	NVJ2	DNTAG0101	-0.043927	0.12118	0.0667569	0.157805
1_DNTAG0102	1	YPR114W	YPR114W	DNTAG0102	0.283068	0.0234089	0.296135	-0.0119143
1_DNTAG0103	1	YBR287W	YBR287W	DNTAG0103	0.0344263	-0.589629	-0.559844	-0.0608166
1_DNTAG0104	1	YDR519W	FPR2	DNTAG0104	0.0613404	-0.0817161	-0.0416906	-0.0205721
1_DNTAG0105	1	YDR056C	EMC10	DNTAG0105	0.138321	-0.0718883	0.0534252	0.172968
1_DNTAG0106	1	YGL079W	KXD1	DNTAG0106	0.166258	-0.1648	-0.00459703	0.158206
1_DNTAG0107	1	YGR206W	MVB12	DNTAG0107	0.0361419	0.0457969	0.0439919	0.280104
1_DNTAG0108	1	YKL061W	BLI1	DNTAG0108	-0.0258083	-0.107202	-0.148407	0.0770696
1_DNTAG0109	1	YLR073C	RFU1	DNTAG0109	-0.0122916	-0.05526	-0.0965437	-0.259857
1_DNTAG0110	1	YLR408C	BLS1	DNTAG0110	-0.0556224	0.202539	0.12581	-0.328196
1_DNTAG0111	1	YMR171C	EAR1	DNTAG0111	-0.17688	-0.171652	-0.363147	0.357599
1_DNTAG0112	1	YNL086W	SNN1	DNTAG0112	-0.0611747	-0.150866	-0.230595	0.148777
1_DNTAG0113	1	YHR105W	YPT35	DNTAG0113	-0.285121	0.109362	-0.185715	-0.0648774
1_DNTAG0116	1	YPL246C	RBD2	DNTAG0116	-0.372137	-0.161044	-0.548615	0.374447
1_DNTAG0117	1	YJR134C	SGM1	DNTAG0117	0.311154	-0.387971	-0.111823	0.13695
1_DNTAG0118	1	YER113C	TMN3	DNTAG0118	0.207945	-0.0601094	0.13732	-0.11275
1_DNTAG0119	1	YOL107W	YOL107W	DNTAG0119	0.216666	-0.121697	0.0808165	-0.111597
1_DNTAG0121	1	YOR311C	DGK1	DNTAG0121	-0.105354	-0.0410853	-0.156289	0.00687424
1_DNTAG0122	1	YDR275W	BSC2	DNTAG0122	-0.277944	0.126464	-0.16411	0.0318582
1_DNTAG0123	1	YCR069W	CPR4	DNTAG0123	0.278986	-0.239632	0.0164401	0.107926
1_DNTAG0124	1	YDR107C	TMN2	DNTAG0124	-0.278371	0.0836139	-0.204854	-0.0812485
1_DNTAG0125	1	YER170W	ADK2	DNTAG0125	0.0941035	-0.213609	-0.120198	0.114583
1_DNTAG0126	1	YKR027W	BCH2	DNTAG0126	0.123889	-0.127102	-0.0155652	0.0773083
1_DNTAG0127	1	YDR033W	MRH1	DNTAG0127	-0.0142597	-0.0922761	-0.15011	0.124169
1_DNTAG0128	1	YER049W	TPA1	DNTAG0128	0.178951	-0.00308446	0.168936	0.0261247
1_DNTAG0129	1	YLR151C	PCD1	DNTAG0129	-0.29888	0.110332	-0.196886	-0.0118331
1_DNTAG0130	1	YMR204C	INP1	DNTAG0130	0.0410719	-0.113738	-0.104541	-0.10226
1_DNTAG0131	1	YOL019W	YOL019W	DNTAG0131	-0.0685783	-0.133714	-0.224601	0.201445
1_DNTAG0132	1	YKR007W	MEH1	DNTAG0132	0.0844401	-0.169546	-0.0985266	0.489901
1_DNTAG0133	1	YDR119W	VBA4	DNTAG0133	-0.0328495	0.0684852	0.0247918	-0.0293198
1_DNTAG0134	1	YDR352W	YPQ2	DNTAG0134	0.107874	-0.0544185	0.0446314	0.0960442
1_DNTAG0135	1	YNR028W	CPR8	DNTAG0135	-0.109262	-0.0719187	-0.19885	0.196944
1_DNTAG0137	1	YDL010W	GRX6	DNTAG0137	-0.0859615	-0.0915796	-0.185448	0.0034325
1_DNTAG0138	1	YHL008C	YHL008C	DNTAG0138	-0.180577	0.113592	-0.0779481	0.255552
1_DNTAG0139	1	YBR014C	GRX7	DNTAG0139	-0.0722846	0.123165	0.0396749	-0.227995
1_DNTAG0140	1	YER014C-A	BUD25	DNTAG0140	0.212671	-0.0532852	0.139589	0.576844
1_DNTAG0141	1	YOR299W	BUD7	DNTAG0141	-0.158936	0.00682795	-0.161711	0.131105
1_DNTAG0143	1	YDR006C	SOK1	DNTAG0143	-0.260135	0.166535	-0.103177	0.110511
1_DNTAG0144	1	YNL323W	LEM3	DNTAG0144	0.132285	0.100478	0.222638	0.3078
1_DNTAG0146	1	YBL101C	ECM21	DNTAG0146	-0.198836	-0.109567	-0.327319	-0.0250594
1_DNTAG0147	1	YOR092W	ECM3	DNTAG0147	0.256599	-0.448541	-0.201649	0.424248
1_DNTAG0148	1	YER083C	GET2	DNTAG0148	0.140626	0.0916518	0.223626	-0.321886
1_DNTAG0149	1	YIL002C	INP51	DNTAG0149	0.145461	0.0645732	0.204664	-0.2947
1_DNTAG0150	1	YNL106C	INP52	DNTAG0150	-0.0635421	0.129438	0.0535209	0.010618
1_DNTAG0151	1	YOR109W	INP53	DNTAG0151	-0.111674	0.10072	-0.0207054	0.00645736
1_DNTAG0153	1	YMR140W	SIP5	DNTAG0153	0.033992	0.0280018	0.0591291	-0.0584213
1_DNTAG0154	1	YJR060W	CBF1	DNTAG0154	0.527926	-0.244108	0.27481	0.103151
1_DNTAG0155	1	YER120W	SCS2	DNTAG0155	0.121544	0.0370842	0.132546	0.0858798
1_DNTAG0156	1	YGL053W	PRM8	DNTAG0156	0.146388	-0.100686	0.034201	0.179965
1_DNTAG0157	1	YBR283C	SSH1	DNTAG0157	0.114723	0.0267444	0.132046	-0.0506255
1_DNTAG0158	1	YER019C-A	SBH2	DNTAG0158	-0.035086	0.130433	0.0729323	-0.303482
1_DNTAG0161	1	YCR036W	RBK1	DNTAG0161	0.611493	-0.702127	-0.134073	0.309033
1_DNTAG0162	1	YHR161C	YAP1801	DNTAG0162	-0.103429	0.00661271	-0.114115	0.0255892
1_DNTAG0163	1	YGR241C	YAP1802	DNTAG0163	-0.0279498	-0.0482101	-0.0906123	-0.0647664
1_DNTAG0165	1	YNR075W	COS10	DNTAG0165	-0.0782817	-0.0288065	-0.108644	-0.198052
1_DNTAG0166	1	YNL227C	JJJ1	DNTAG0166	0.292672	-0.0328765	0.247705	-0.126224
1_DNTAG0167	1	YPL032C	SVL3	DNTAG0167	-0.0187486	-0.0272401	-0.0715967	-0.16405
1_DNTAG0168	1	YDL231C	BRE4	DNTAG0168	0.00825086	0.0201971	0.0191184	-0.0965682
1_DNTAG0171	1	YDR388W	RVS167	DNTAG0171	0.115357	-0.0975055	0.00427961	0.251595
1_DNTAG0172	1	YCR009C	RVS161	DNTAG0172	0.179832	-0.222991	-0.0542778	0.246132
1_DNTAG0173	1	YCR053W	THR4	DNTAG0173	0.0820737	0.0627207	0.101429	-0.153823
1_DNTAG0174	1	YDR264C	AKR1	DNTAG0174	1.05536	-0.630281	0.415147	0.188047
1_DNTAG0175	1	YDR036C	EHD3	DNTAG0175	-0.0780012	0.0169055	-0.0735383	0.0525257
1_DNTAG0176	1	YDR069C	DOA4	DNTAG0176	0.0283935	0.320845	0.329425	-0.0208675
1_DNTAG0178	1	YAL030W	SNC1	DNTAG0178	0.118422	-0.129581	-0.0213052	0.0422837
1_DNTAG0179	1	YOR327C	SNC2	DNTAG0179	0.0211817	-0.206433	-0.193327	0.281024
1_DNTAG0180	1	YBR207W	FTH1	DNTAG0180	-0.117889	0.0494806	-0.0787859	-0.218182
1_DNTAG0181	1	YIL090W	ICE2	DNTAG0181	0.0380311	0.134262	0.161846	-0.27489
1_DNTAG0182	1	YDR320C	SWA2	DNTAG0182	0.390682	-0.496866	-0.121199	0.837385
1_DNTAG0183	1	YNL049C	SFB2	DNTAG0183	0.176746	-0.250316	-0.0959824	0.0231138
1_DNTAG0184	1	YAL007C	ERP2	DNTAG0184	-0.105344	-0.080393	-0.223702	-0.0947338
1_DNTAG0185	1	YML012W	ERV25	DNTAG0185	-0.249433	0.0919164	-0.175046	0.0576333
1_DNTAG0186	1	YGR284C	ERV29	DNTAG0186	-0.0166144	0.00799028	-0.0205453	-0.121316
1_DNTAG0187	1	YNL044W	YIP3	DNTAG0187	-0.0476522	0.0220511	-0.0359437	-0.0247985
1_DNTAG0188	1	YCR067C	SED4	DNTAG0188	0.154714	-0.162418	-0.0178549	-0.116681
1_DNTAG0190	1	YDR057W	YOS9	DNTAG0190	-0.00774356	0.215421	0.207136	0.056677
1_DNTAG0191	1	YHR098C	SFB3	DNTAG0191	1.36273	-0.404579	0.948128	0.678585
1_DNTAG0192	1	YJL192C	SOP4	DNTAG0192	0.00972099	-0.0314843	-0.0273666	0.0413451
1_DNTAG0193	1	YOR216C	RUD3	DNTAG0193	0.00222485	-0.0386381	-0.0558861	-0.112178
1_DNTAG0194	1	YFL048C	EMP47	DNTAG0194	0.0210603	-0.0635262	-0.052594	0.0571663
1_DNTAG0195	1	YLR080W	EMP46	DNTAG0195	-0.0672201	-0.015671	-0.0980288	0.0588696
1_DNTAG0196	1	YML067C	ERV41	DNTAG0196	0.101344	0.0375639	0.125552	-0.0391924
1_DNTAG0197	1	YAL042W	ERV46	DNTAG0197	-0.0766525	0.058656	-0.0415075	-0.0323725
1_DNTAG0198	1	YAR002C-A	ERP1	DNTAG0198	0.0180577	-0.134758	-0.13567	-0.0540034
1_DNTAG0199	1	YGR166W	TRS65	DNTAG0199	0.37071	-0.128844	0.213717	0.059171
1_DNTAG0200	1	YOR115C	TRS33	DNTAG0200	-0.191702	-0.186487	-0.40621	0.0319139
1_DNTAG0201	1	YIL044C	AGE2	DNTAG0201	-0.0934379	0.037268	-0.0514813	0.0404263
1_DNTAG0202	1	YIL076W	SEC28	DNTAG0202	0.322165	-0.270299	0.0445455	0.0335445
1_DNTAG0203	1	YCL001W	RER1	DNTAG0203	-0.0721754	-0.0572782	-0.139821	0.0408017
1_DNTAG0204	1	YDR524C	AGE1	DNTAG0204	0.771477	-0.0576802	0.561493	0.52791
1_DNTAG0205	1	YDL226C	GCS1	DNTAG0205	1.29947	-0.473286	0.787865	0.628659
1_DNTAG0206	1	YDL192W	ARF1	DNTAG0206	0.113322	0.207137	0.307407	-0.126574
1_DNTAG0207	1	YDL137W	ARF2	DNTAG0207	-0.0766194	0.0520864	-0.0300284	0.045985
1_DNTAG0208	1	YHR142W	CHS7	DNTAG0208	0.315067	-0.0124227	0.272738	0.0187089
1_DNTAG0209	1	YGL054C	ERV14	DNTAG0209	0.295151	0.107725	0.374433	-0.353698
1_DNTAG0210	1	YGL200C	EMP24	DNTAG0210	-0.0747812	0.12917	0.0392608	-0.223305
1_DNTAG0211	1	YLR268W	SEC22	DNTAG0211	0.0650184	0.306192	0.358374	-0.380377
1_DNTAG0212	1	YER122C	GLO3	DNTAG0212	0.227089	-0.000171346	0.213818	-0.253131
1_DNTAG0213	1	YMR292W	GOT1	DNTAG0213	0.0838349	0.0902884	0.152205	0.00293934
1_DNTAG0214	1	YJR031C	GEA1	DNTAG0214	-0.0846552	-0.144982	-0.239956	0.128941
1_DNTAG0216	1	YDR108W	TRS85	DNTAG0216	-0.170422	0.0285987	-0.151561	-0.148545
1_DNTAG0217	1	YLR207W	HRD3	DNTAG0217	-0.061967	-0.0190481	-0.0887056	0.0600508
1_DNTAG0218	1	YHR204W	MNL1	DNTAG0218	-0.0248549	-0.127604	-0.164628	-0.182096
1_DNTAG0219	1	YBR201W	DER1	DNTAG0219	-0.15691	0.29289	0.131175	-0.116968
1_DNTAG0220	1	YOL013C	HRD1	DNTAG0220	0.123761	0.0121479	0.110639	0.0753252
1_DNTAG0222	1	YNL064C	YDJ1	DNTAG0222	0.0410462	0.0162759	0.044744	0.00801001
1_DNTAG0223	1	YFL025C	BST1	DNTAG0223	0.219391	0.0515409	0.228688	-0.219927
1_DNTAG0224	1	YMR264W	CUE1	DNTAG0224	0.138479	-0.149464	-0.0226169	0.241311
1_DNTAG0225	1	YKL079W	SMY1	DNTAG0225	-0.310262	0.148213	-0.17716	0.155218
1_DNTAG0226	1	YOL065C	INP54	DNTAG0226	0.162206	0.0718506	0.212248	-0.0644406
1_DNTAG0227	1	YDR122W	KIN1	DNTAG0227	-0.266024	-0.176644	-0.450081	0.240166
1_DNTAG0228	1	YLR096W	KIN2	DNTAG0228	-0.21895	-0.0683193	-0.300805	-0.0772941
1_DNTAG0229	1	YPR032W	SRO7	DNTAG0229	0.213387	-0.031225	0.165656	0.07228
1_DNTAG0230	1	YBL106C	SRO77	DNTAG0230	0.0452698	-0.0207537	0.0192834	-0.218187
1_DNTAG0231	1	YOR049C	RSB1	DNTAG0231	-0.259383	0.293889	-0.0757984	-0.459533
1_DNTAG0232	1	YPL147W	PXA1	DNTAG0232	-0.190922	0.286636	0.085831	-0.0895702
1_DNTAG0233	1	YKL188C	PXA2	DNTAG0233	-0.246011	-0.176891	-0.452557	-0.000716544
1_DNTAG0235	1	YDR153C	ENT5	DNTAG0235	-0.0128047	-0.144855	-0.171224	-0.0745244
1_DNTAG0236	1	YBL102W	SFT2	DNTAG0236	0.0605404	-0.0569046	-0.01858	-0.0605179
1_DNTAG0237	1	YJL004C	SYS1	DNTAG0237	0.0126223	-0.234485	-0.231066	-0.0403191
1_DNTAG0238	1	YJL099W	CHS6	DNTAG0238	0.0115619	-0.102759	-0.0893778	-0.0111373
1_DNTAG0239	1	YPL195W	APL5	DNTAG0239	0.338894	0.00336146	0.331535	-0.190962
1_DNTAG0240	1	YGR261C	APL6	DNTAG0240	-0.0942109	0.18809	0.0858147	-0.0890369
1_DNTAG0241	1	YBR288C	APM3	DNTAG0241	-0.0607004	0.0331926	-0.0449255	0.0422636
1_DNTAG0242	1	YJL024C	APS3	DNTAG0242	-0.157588	0.199679	0.02864	-0.264145
1_DNTAG0243	1	YJL222W	VTH2	DNTAG0243	-0.0618702	-0.151786	-0.240342	-0.0327338
1_DNTAG0245	1	YOR036W	PEP12	DNTAG0245	0.209026	0.0586624	0.253736	0.0621468
1_DNTAG0246	1	YDR358W	GGA1	DNTAG0246	-0.0105691	-0.0895655	-0.103618	0.0554306
1_DNTAG0247	1	YHR108W	GGA2	DNTAG0247	-0.0463768	-0.134701	-0.190618	0.097984
1_DNTAG0248	1	YJL029C	VPS53	DNTAG0248	0.458327	-0.0847849	0.365655	0.443524
1_DNTAG0249	1	YDR484W	VPS52	DNTAG0249	-0.324205	0.22787	-0.106298	-0.132694
1_DNTAG0250	1	YDR027C	VPS54	DNTAG0250	0.377564	-0.0944569	0.276579	0.165374
1_DNTAG0251	1	YKL179C	COY1	DNTAG0251	0.872108	-0.528785	0.236769	0.225318
1_DNTAG0252	1	YOL062C	APM4	DNTAG0252	0.118848	-0.118147	-0.00445098	-0.0744049
1_DNTAG0253	1	YJL044C	GYP6	DNTAG0253	0.125724	-0.0986427	0.0146867	0.127115
1_DNTAG0254	1	YDR137W	RGP1	DNTAG0254	0.0317092	-0.246276	-0.220719	0.234114
1_DNTAG0255	1	YER166W	DNF1	DNTAG0255	-0.190249	0.230205	-0.00430288	-0.127664
1_DNTAG0256	1	YLR039C	RIC1	DNTAG0256	0.429149	-0.414503	0.013163	0.493904
1_DNTAG0257	1	YDR093W	DNF2	DNTAG0257	-0.310739	0.00987422	-0.340617	-0.0366861
1_DNTAG0258	1	YPL051W	ARL3	DNTAG0258	0.0401281	-0.236589	-0.220744	0.22912
1_DNTAG0259	1	YMR162C	DNF3	DNTAG0259	-0.0917088	0.000337488	-0.0980155	-0.0900343
1_DNTAG0260	1	YGR142W	BTN2	DNTAG0260	0.00574915	-0.127993	-0.129995	-0.20551
1_DNTAG0261	1	YLR262C	YPT6	DNTAG0261	0.275422	0.0101017	0.277814	-0.220141
1_DNTAG0262	1	YJL059W	YHC3	DNTAG0262	-0.378161	0.0523343	-0.340438	-0.083498
1_DNTAG0263	1	YNL051W	COG5	DNTAG0263	-0.0988827	0.0582868	-0.0530985	-0.0215456
1_DNTAG0264	1	YNL041C	COG6	DNTAG0264	-0.190949	-0.168038	-0.367404	0.0839544
1_DNTAG0265	1	YML071C	COG8	DNTAG0265	0.161433	-0.15895	-0.00776079	0.0119376
1_DNTAG0266	1	YGL005C	COG7	DNTAG0266	-0.0111179	-0.00535919	-0.0236671	-0.125924
1_DNTAG0268	1	YOR275C	RIM20	DNTAG0268	-0.184189	-0.315187	-0.54651	0.337481
1_DNTAG0269	1	YOL116W	MSN1	DNTAG0269	-0.0543946	-0.0471755	-0.112117	0.103062
1_DNTAG0271	1	YJR044C	VPS55	DNTAG0271	0.221862	-0.216273	-0.0172691	-0.0708906
1_DNTAG0272	1	YLR360W	VPS38	DNTAG0272	0.0445426	-0.182132	-0.147502	0.335251
1_DNTAG0273	1	YAL002W	VPS8	DNTAG0273	-0.121513	-0.113709	-0.243991	0.155756
1_DNTAG0274	1	YLR025W	SNF7	DNTAG0274	-0.218336	-0.0265543	-0.266035	0.519744
1_DNTAG0275	1	YMR077C	VPS20	DNTAG0275	-0.203094	-0.160668	-0.389171	0.520045
1_DNTAG0276	1	YKL041W	VPS24	DNTAG0276	0.135975	-0.0231313	0.102455	-0.0384661
1_DNTAG0277	1	YDR486C	VPS60	DNTAG0277	-0.252053	-0.358987	-0.620663	0.521529
1_DNTAG0281	1	YDR492W	IZH1	DNTAG0281	-0.128901	0.026814	-0.115601	-0.177162
1_DNTAG0282	1	YLR023C	IZH3	DNTAG0282	-0.100456	0.0246672	-0.0862645	-0.0848097
1_DNTAG0283	1	YOL002C	IZH2	DNTAG0283	-0.0955523	-0.240962	-0.348042	0.371376
1_DNTAG0284	1	YOL101C	IZH4	DNTAG0284	-0.0109661	-0.00240768	-0.0433773	-0.112175
1_DNTAG0285	1	YMR010W	YMR010W	DNTAG0285	-0.214712	-0.118836	-0.343948	0.128233
1_DNTAG0286	1	YHR195W	NVJ1	DNTAG0286	0.00660506	0.200435	0.193195	-0.118781
1_DNTAG0287	1	YGL014W	PUF4	DNTAG0287	0.213119	-0.260581	-0.0732688	0.0391311
1_DNTAG0288	1	YPL037C	EGD1	DNTAG0288	0.119142	-0.139719	-0.0292909	-0.0237302
1_DNTAG0289	1	YHR193C	EGD2	DNTAG0289	0.0134007	0.130045	0.0651314	-0.126907
1_DNTAG0290	1	YCR020C-A	MAK31	DNTAG0290	0.717063	-0.544329	0.159334	0.129727
1_DNTAG0291	1	YEL053C	MAK10	DNTAG0291	0.128756	0.0398166	0.155252	-0.449213
1_DNTAG0292	1	YPR051W	MAK3	DNTAG0292	0.116055	-0.0920164	0.00832057	0.186105
1_DNTAG0293	1	YIL016W	SNL1	DNTAG0293	0.116548	-0.0213648	0.0879849	-0.0134774
1_DNTAG0294	1	YML038C	YMD8	DNTAG0294	0.105803	-0.312865	-0.210068	0.0871836
1_DNTAG0295	1	YKL209C	STE6	DNTAG0295	-0.13011	0.194721	0.0579843	-0.118942
1_DNTAG0296	1	YDR410C	STE14	DNTAG0296	-0.0633854	0.0106671	-0.0598485	0.252385
1_DNTAG0297	1	YIR004W	DJP1	DNTAG0297	0.101467	-0.249166	-0.153612	-0.0806126
1_DNTAG0298	1	YNL329C	PEX6	DNTAG0298	-0.00981193	0.211528	0.190528	-0.0399386
1_DNTAG0299	1	YOR084W	LPX1	DNTAG0299	-0.204961	-0.144224	-0.357511	0.403006
1_DNTAG0300	1	YDR265W	PEX10	DNTAG0300	0.104381	0.0364288	0.123075	0.116018
1_DNTAG0301	1	YMR026C	PEX12	DNTAG0301	0.0153139	-0.0206369	-0.0151352	0.316819
1_DNTAG0302	1	YNL214W	PEX17	DNTAG0302	-0.0765955	-0.020921	-0.115307	0.0663477
1_DNTAG0303	1	YJL210W	PEX2	DNTAG0303	0.0960964	-0.0261611	0.0484488	0.201326
1_DNTAG0304	1	YPL112C	PEX25	DNTAG0304	0.228347	-0.567826	-0.347804	0.2711
1_DNTAG0305	1	YOR193W	PEX27	DNTAG0305	-0.0321796	-0.0277635	-0.0663328	-0.0601464
1_DNTAG0306	1	YDR479C	PEX29	DNTAG0306	0.0378327	0.346503	0.376617	-0.267953
1_DNTAG0307	1	YKL197C	PEX1	DNTAG0307	-0.0144106	-0.0493599	-0.0675641	0.00590678
1_DNTAG0308	1	YLR324W	PEX30	DNTAG0308	0.0297098	0.0254492	0.0399842	0.03968
1_DNTAG0309	1	YPR128C	ANT1	DNTAG0309	-0.21487	-0.174278	-0.404107	0.126546
1_DNTAG0310	1	YDL065C	PEX19	DNTAG0310	0.0895077	-0.257562	-0.177986	0.141486
1_DNTAG0311	1	YDR244W	PEX5	DNTAG0311	0.00876627	-0.0245346	-0.039472	0.0734695
1_DNTAG0312	1	YDR142C	PEX7	DNTAG0312	-0.114332	-0.283026	-0.404402	0.134791
1_DNTAG0313	1	YOL147C	PEX11	DNTAG0313	0.271	-0.014525	0.244592	-0.277692
1_DNTAG0314	1	YLR191W	PEX13	DNTAG0314	0.0894511	-0.213032	-0.126748	0.0303657
1_DNTAG0315	1	YOL044W	PEX15	DNTAG0315	0.0928767	0.00926414	0.100502	-0.0533494
1_DNTAG0316	1	YDR329C	PEX3	DNTAG0316	0.128772	-0.167159	-0.0519735	0.13814
1_DNTAG0317	1	YGR077C	PEX8	DNTAG0317	0.420906	-0.0841831	0.324916	0.204775
1_DNTAG0318	1	YGR133W	PEX4	DNTAG0318	0.173082	-0.170213	-0.012112	-0.228946
1_DNTAG0319	1	YML121W	GTR1	DNTAG0319	-0.125829	-0.192964	-0.340297	0.40772
1_DNTAG0321	1	YLR292C	SEC72	DNTAG0321	0.1497	-0.222978	-0.083949	0.0326339
1_DNTAG0322	1	YHR013C	ARD1	DNTAG0322	-0.857027	-0.067079	-0.93131	-0.127805
1_DNTAG0323	1	YDL040C	NAT1	DNTAG0323	-1.77133	0.554274	-1.39767	-0.223354
1_DNTAG0325	1	YNR032W	PPG1	DNTAG0325	-0.177479	0.254304	0.0669498	-0.0649346
1_DNTAG0326	1	YGR123C	PPT1	DNTAG0326	-0.0419807	0.15815	0.106513	0.188946
1_DNTAG0327	1	YDR477W	SNF1	DNTAG0327	0.386921	-0.0907347	0.283269	-0.14092
1_DNTAG0328	1	YDR490C	PKH1	DNTAG0328	0.0840298	-0.131888	-0.0593106	0.0605903
1_DNTAG0329	1	YKL126W	YPK1	DNTAG0329	0.218207	-0.0460433	0.167618	0.121551
1_DNTAG0330	1	YHR079C	IRE1	DNTAG0330	-0.072465	0.071259	-0.0110855	0.035627
1_DNTAG0334	1	YNL265C	IST1	DNTAG0334	0.192621	-0.249257	-0.0668017	0.0601695
1_DNTAG0335	1	YGR105W	VMA21	DNTAG0335	0.313539	0.236508	0.54535	-0.416053
1_DNTAG0338	1	YKL119C	VPH2	DNTAG0338	0.750241	-0.187005	0.542483	-0.23017
1_DNTAG0339	1	YNR051C	BRE5	DNTAG0339	0.0352463	0.0966365	0.112952	-0.182664
1_DNTAG0340	1	YDL122W	UBP1	DNTAG0340	0.0706469	0.213442	0.267295	-0.242883
1_DNTAG0341	1	YLR216C	CPR6	DNTAG0341	-0.110361	0.00283493	-0.135043	0.096052
1_DNTAG0342	1	YBR169C	SSE2	DNTAG0342	0.0752373	-0.349035	-0.259894	0.151528
1_DNTAG0343	1	YLL024C	SSA2	DNTAG0343	-0.0646425	0.213888	0.146383	-0.0363616
1_DNTAG0344	1	YDR518W	EUG1	DNTAG0344	0.159173	-0.158825	-0.0150697	0.060596
1_DNTAG0346	1	YML078W	CPR3	DNTAG0346	0.00308852	0.0380504	0.0335774	0.0161554
1_DNTAG0347	1	YOR288C	MPD1	DNTAG0347	0.122992	0.0602475	0.167783	-0.111091
1_DNTAG0349	1	YMR161W	HLJ1	DNTAG0349	0.0774495	0.300374	0.368803	-0.317684
1_DNTAG0350	1	YJL073W	JEM1	DNTAG0350	0.050211	0.085581	0.123494	-0.098549
1_DNTAG0351	1	YOR357C	SNX3	DNTAG0351	0.101922	-0.062958	0.0292689	-0.110925
1_DNTAG0352	1	YDR155C	CPR1	DNTAG0352	-0.0226206	-0.27543	-0.312746	0.2781
1_DNTAG0353	1	YLR121C	YPS3	DNTAG0353	0.0969345	0.058332	0.151683	-0.105123
1_DNTAG0354	1	YKL010C	UFD4	DNTAG0354	0.0213618	-0.0879948	-0.0778079	0.0762362
1_DNTAG0355	1	YER100W	UBC6	DNTAG0355	0.0166318	0.0524665	0.0574378	0.365664
1_DNTAG0356	1	YLR120C	YPS1	DNTAG0356	-0.147424	-0.223511	-0.38289	0.0155888
1_DNTAG0357	1	YMR274C	RCE1	DNTAG0357	0.00459245	-0.0535007	-0.0543586	0.0212687
1_DNTAG0358	1	YLR250W	SSP120	DNTAG0358	0.174903	-0.0708542	0.0936144	-0.0649258
1_DNTAG0359	1	YPR149W	NCE102	DNTAG0359	0.0325276	0.0701637	0.0926942	0.0241087
1_DNTAG0360	1	YBR162W-A	YSY6	DNTAG0360	-0.288106	-0.0443278	-0.341067	-0.0622976
1_DNTAG0362	1	YDR425W	SNX41	DNTAG0362	0.37133	-0.0825683	0.278982	-0.0536182
1_DNTAG0363	1	YKL073W	LHS1	DNTAG0363	0.0498291	0.0063957	0.0335515	0.3654
1_DNTAG0364	1	YDR313C	PIB1	DNTAG0364	-0.162938	0.261322	-0.260849	0.0460817
1_DNTAG0365	1	YIL005W	EPS1	DNTAG0365	-0.163494	0.0989133	-0.115023	-0.146163
1_DNTAG0366	1	YDR414C	ERD1	DNTAG0366	0.142215	-0.0489043	0.0875246	-0.0848489
1_DNTAG0367	1	YKL002W	DID4	DNTAG0367	-0.0682856	-0.144535	-0.22412	0.487992
1_DNTAG0368	1	YPR173C	VPS4	DNTAG0368	0.0889907	-0.0659131	0.00781456	0.158216
1_DNTAG0369	1	YNR006W	VPS27	DNTAG0369	-0.281334	0.105253	-0.190913	0.400679
1_DNTAG0370	1	YJL053W	PEP8	DNTAG0370	0.0262268	-0.0243655	-0.00680808	-0.0951831
1_DNTAG0371	1	YJL154C	VPS35	DNTAG0371	-0.224689	0.169583	-0.0685085	0.181843
1_DNTAG0372	1	YOR069W	VPS5	DNTAG0372	0.198732	0.0933425	0.298882	-0.305794
1_DNTAG0374	1	YBL069W	AST1	DNTAG0374	-0.165532	0.192916	0.0228945	0.0853798
1_DNTAG0375	1	YLR246W	ERF2	DNTAG0375	-0.174456	0.066771	-0.136278	0.286604
1_DNTAG0376	1	YOR297C	TIM18	DNTAG0376	0.0186142	-0.0642624	-0.0552456	0.0856191
1_DNTAG0377	1	YHR160C	PEX18	DNTAG0377	-0.0486913	0.0213281	-0.126626	-0.363907
1_DNTAG0378	1	YGR239C	PEX21	DNTAG0378	-0.0133599	0.00610195	-0.0251331	0.127585
1_DNTAG0379	1	YGL153W	PEX14	DNTAG0379	-0.0495063	0.0856709	0.0270637	0.238748
1_DNTAG0380	1	YAL055W	PEX22	DNTAG0380	-0.0575485	0.0360145	-0.0314996	0.0614887
1_DNTAG0381	1	YGR141W	VPS62	DNTAG0381	-0.0982927	0.000987626	-0.102723	-0.104005
1_DNTAG0382	1	YJR126C	VPS70	DNTAG0382	0.126259	-0.13687	-0.030793	0.0223514
1_DNTAG0383	1	YMR004W	MVP1	DNTAG0383	0.0299424	-0.049515	-0.0295461	0.0628927
1_DNTAG0384	1	YDR495C	VPS3	DNTAG0384	0.426346	0.0228518	0.439675	-0.186697
1_DNTAG0385	1	YPR139C	LOA1	DNTAG0385	0.76017	-0.458905	0.195751	0.425109
1_DNTAG0386	1	YOL082W	ATG19	DNTAG0386	-0.0301098	-0.00487581	-0.0448658	-0.196597
1_DNTAG0388	1	YML097C	VPS9	DNTAG0388	-0.118083	0.0961213	-0.0414011	0.0936354
1_DNTAG0389	1	YOR359W	VTS1	DNTAG0389	-0.214178	-0.136682	-0.384756	0.123485
1_DNTAG0390	1	YHL002W	HSE1	DNTAG0390	-0.0174871	0.313991	0.277036	-0.0421601
1_DNTAG0391	1	YGL104C	VPS73	DNTAG0391	0.138284	-0.182337	-0.0533184	0.138702
1_DNTAG0395	1	YBL078C	ATG8	DNTAG0395	-0.0942505	-0.159051	-0.277811	0.160307
1_DNTAG0397	1	YNR007C	ATG3	DNTAG0397	0.0106092	0.0123575	-0.0108696	-0.0999664
1_DNTAG0398	1	YLR085C	ARP6	DNTAG0398	0.0702767	-0.243869	-0.190021	0.0793938
1_DNTAG0399	1	YHR171W	ATG7	DNTAG0399	0.148976	-0.0431629	0.0874438	-0.0162468
1_DNTAG0400	1	YDL149W	ATG9	DNTAG0400	0.0467959	-0.0585458	-0.0225847	-0.0749741
1_DNTAG0401	1	YKR035W-A	DID2	DNTAG0401	-0.199841	0.0949258	-0.117148	-0.00545537
1_DNTAG0402	1	YKR001C	VPS1	DNTAG0402	0.134086	-0.0195513	0.0928143	-0.122144
1_DNTAG0403	1	YDR200C	VPS64	DNTAG0403	0.0307737	-0.446995	-0.420273	0.203436
1_DNTAG0404	1	YDR485C	VPS72	DNTAG0404	0.01147	-0.108928	-0.10634	0.196341
1_DNTAG0405	1	YFR021W	ATG18	DNTAG0405	-0.0310618	-0.110891	-0.149901	0.228592
1_DNTAG0406	1	YPL149W	ATG5	DNTAG0406	0.126638	-0.109911	0.00835308	0.0128308
1_DNTAG0407	1	YGL124C	MON1	DNTAG0407	-0.342409	0.194452	-0.184908	-0.159036
1_DNTAG0408	1	YNL297C	MON2	DNTAG0408	-0.0726856	0.235573	0.153884	-0.309735
1_DNTAG0409	1	YBR290W	BSD2	DNTAG0409	0.0956799	0.0140383	0.102041	-0.0937593
1_DNTAG0410	1	YLR119W	SRN2	DNTAG0410	-0.185718	-0.147963	-0.348795	0.378529
1_DNTAG0411	1	YCL008C	STP22	DNTAG0411	0.21615	-0.268679	-0.10415	0.500662
1_DNTAG0412	1	YPL065W	VPS28	DNTAG0412	0.0176691	0.0700486	0.0748344	0.262089
1_DNTAG0413	1	YPL002C	SNF8	DNTAG0413	-0.452415	0.0626118	-0.400677	0.405213
1_DNTAG0414	1	YJR102C	VPS25	DNTAG0414	-0.15181	-0.126175	-0.280994	0.462985
1_DNTAG0415	1	YLR417W	VPS36	DNTAG0415	-0.173763	-0.029742	-0.2156	0.521677
1_DNTAG0416	1	YPR049C	ATG11	DNTAG0416	0.034166	-0.0726027	-0.107245	0.251681
1_DNTAG0417	1	YPR185W	ATG13	DNTAG0417	-0.0225022	0.108241	0.0762456	-0.0820462
1_DNTAG0418	1	YNL242W	ATG2	DNTAG0418	0.0391274	-0.0985009	-0.069095	0.154911
1_DNTAG0420	1	YKR020W	VPS51	DNTAG0420	0.392231	-0.018901	0.35317	0.106102
1_DNTAG0421	1	YCL038C	ATG22	DNTAG0421	-0.00920952	-0.0209286	-0.0379572	-0.371944
1_DNTAG0422	1	YEL027W	VMA3	DNTAG0422	0.492213	-0.110982	0.389061	-0.500803
1_DNTAG0423	1	YKR014C	YPT52	DNTAG0423	-0.032075	0.123675	0.0818049	-0.0116647
1_DNTAG0424	1	YNL093W	YPT53	DNTAG0424	-0.0426561	-0.0245414	-0.0796455	-0.170955
1_DNTAG0425	1	YDL113C	ATG20	DNTAG0425	0.227009	-0.0906279	0.128837	-0.13964
1_DNTAG0426	1	YBR217W	ATG12	DNTAG0426	-0.117533	0.13137	-0.0020173	0.122552
1_DNTAG0427	1	YPL120W	VPS30	DNTAG0427	-0.0114009	-0.00646233	-0.027802	-0.199826
1_DNTAG0428	1	YBR131W	CCZ1	DNTAG0428	-0.0915838	0.415148	0.316334	-0.284064
1_DNTAG0429	1	YNL223W	ATG4	DNTAG0429	0.172152	0.14714	0.309384	-0.370232
1_DNTAG0430	1	YOR089C	VPS21	DNTAG0430	-0.231687	0.351689	0.128957	-0.00903292
1_DNTAG0431	1	YML041C	VPS71	DNTAG0431	-0.0713395	0.0056102	-0.0823185	0.167323
1_DNTAG0432	1	YBR164C	ARL1	DNTAG0432	0.0351099	0.0619781	0.0865383	0.0239941
1_DNTAG0433	1	YPL045W	VPS16	DNTAG0433	0.361437	0.139195	0.441324	0.139519
1_DNTAG0434	1	YEL013W	VAC8	DNTAG0434	-0.147955	0.128096	-0.0286555	0.117429
1_DNTAG0435	1	YCL057W	PRD1	DNTAG0435	0.250959	-0.157945	0.0808402	0.0854384
1_DNTAG0437	1	YGR231C	PHB2	DNTAG0437	-0.017595	0.231097	0.175131	0.0757499
1_DNTAG0438	1	YNL119W	NCS2	DNTAG0438	0.433104	-0.417213	-0.0300562	0.162754
1_DNTAG0439	1	YGR086C	PIL1	DNTAG0439	0.226187	0.0324198	0.224914	-0.00828561
1_DNTAG0440	1	YDL100C	GET3	DNTAG0440	0.0930434	0.27089	0.268056	-0.130489
1_DNTAG0441	1	YJR032W	CPR7	DNTAG0441	0.315406	0.170246	0.470913	-0.440045
1_DNTAG0443	1	YBL075C	SSA3	DNTAG0443	-0.153936	0.0799208	-0.0817418	-0.15413
1_DNTAG0445	1	YDR059C	UBC5	DNTAG0445	-0.0232119	0.0810802	0.0492439	0.0507938
1_DNTAG0446	1	YGR038W	ORM1	DNTAG0446	-0.0592631	-0.0244041	-0.0951058	0.0478191
1_DNTAG0447	1	YLR350W	ORM2	DNTAG0447	0.156523	0.19112	0.338606	-0.0143607
1_DNTAG0448	1	YCR044C	PER1	DNTAG0448	0.0164126	-0.0442275	-0.0663428	0.0892054
1_DNTAG0449	1	YOR132W	VPS17	DNTAG0449	0.120312	-0.175646	-0.0712687	0.0805179
1_DNTAG0451	1	YML048W	GSF2	DNTAG0451	0.0587381	0.182181	0.214852	-0.17013
1_DNTAG0452	1	YDL018C	ERP3	DNTAG0452	-0.00292458	-0.11715	-0.13053	-0.0575787
1_DNTAG0453	1	YOR016C	ERP4	DNTAG0453	0.0200975	-0.0695874	-0.0623178	0.135781
1_DNTAG0454	1	YHR110W	ERP5	DNTAG0454	-0.152	-0.0334349	-0.195465	-0.0090707
1_DNTAG0455	1	YPR095C	SYT1	DNTAG0455	-0.0102755	0.0608611	0.0421145	0.088277
1_DNTAG0456	1	YGL002W	ERP6	DNTAG0456	0.0399609	0.101194	0.126492	-0.254581
1_DNTAG0457	1	YDR229W	IVY1	DNTAG0457	-0.00819502	-0.191296	-0.208064	-0.037809
1_DNTAG0458	1	YJL117W	PHO86	DNTAG0458	0.423178	-0.0577095	0.350361	-0.334757
1_DNTAG0459	1	YGL167C	PMR1	DNTAG0459	0.115023	0.204808	0.263495	-0.324639
1_DNTAG0460	1	YJR010C-A	SPC1	DNTAG0460	-0.107232	-0.176265	-0.303905	-0.0491231
1_DNTAG0461	1	YML055W	SPC2	DNTAG0461	0.129275	0.0544692	0.170767	-0.129533
1_DNTAG0462	1	YDL138W	RGT2	DNTAG0462	0.222853	-0.0180003	0.190777	-0.00104916
1_DNTAG0463	1	YDL194W	SNF3	DNTAG0463	0.00409719	-0.170857	-0.171804	0.0838884
1_DNTAG0464	1	YLR330W	CHS5	DNTAG0464	0.220002	0.0831517	0.292417	-0.0312897
1_DNTAG0465	1	YMR017W	SPO20	DNTAG0465	-0.0459792	0.226679	0.171842	-0.229268
1_DNTAG0466	1	YKR031C	SPO14	DNTAG0466	-0.355165	0.281884	-0.101967	-0.181068
1_DNTAG0467	1	YNR049C	MSO1	DNTAG0467	-0.0625318	0.0137261	-0.0728428	-0.000340762
1_DNTAG0468	1	YPL154C	PEP4	DNTAG0468	-0.0959697	0.107074	0.00382068	-0.0550392
1_DNTAG0469	1	YEL060C	PRB1	DNTAG0469	0.114523	0.0198502	0.128707	0.0177801
1_DNTAG0470	1	YOL031C	SIL1	DNTAG0470	-0.0233967	0.192963	0.149125	-0.338667
1_DNTAG0471	1	YER087C-B	SBH1	DNTAG0471	0.168984	-0.0880922	0.029931	-0.119971
1_DNTAG0472	1	YLR083C	EMP70	DNTAG0472	-0.39873	0.159817	-0.254911	0.0344497
1_DNTAG0473	1	YLL043W	FPS1	DNTAG0473	0.142143	-0.149403	-0.0167136	-0.358246
1_DNTAG0474	1	YPL084W	BRO1	DNTAG0474	-0.496676	0.0217921	-0.484326	0.160597
1_DNTAG0475	1	YER143W	DDI1	DNTAG0475	0.141305	-0.126634	-0.0115589	0.0320347
1_DNTAG0477	1	YMR054W	STV1	DNTAG0477	0.104394	-0.170243	-0.0917447	0.00128137
1_DNTAG0479	1	YPL234C	VMA11	DNTAG0479	-0.225356	0.592526	0.322251	-0.292855
1_DNTAG0480	1	YPR036W	VMA13	DNTAG0480	-0.100994	0.191851	0.0766427	-0.566124
1_DNTAG0481	1	YOR332W	VMA4	DNTAG0481	0.0175794	0.275779	0.256877	-0.457058
1_DNTAG0482	1	YKL080W	VMA5	DNTAG0482	-0.228733	0.821478	0.588103	-0.844899
1_DNTAG0483	1	YGR020C	VMA7	DNTAG0483	0.37339	0.561739	0.930488	-0.592439
1_DNTAG0484	1	YEL051W	VMA8	DNTAG0484	0.307663	0.425513	0.734154	-0.389907
1_DNTAG0485	1	YJR033C	RAV1	DNTAG0485	0.27866	0.202862	0.476341	-0.266937
1_DNTAG0486	1	YHR039C-A	VMA10	DNTAG0486	0.161681	0.0345019	0.0706174	-0.344579
1_DNTAG0487	1	YDR456W	NHX1	DNTAG0487	0.112825	0.0701713	0.171626	0.0176611
1_DNTAG0488	1	YDR202C	RAV2	DNTAG0488	0.312163	-0.28112	0.000965164	-0.0314644
1_DNTAG0489	1	YDL185W	VMA1	DNTAG0489	0.161922	-0.0560462	0.103028	-0.176217
1_DNTAG0490	1	YLR447C	VMA6	DNTAG0490	-0.205477	0.24652	0.0278482	-0.207799
1_DNTAG0491	1	YOR270C	VPH1	DNTAG0491	-0.0225185	-0.0252131	-0.0625223	-0.0984799
1_DNTAG0493	1	YMR297W	PRC1	DNTAG0493	-0.0615797	-0.157509	-0.234905	0.129573
1_DNTAG0494	1	YLR373C	VID22	DNTAG0494	0.463865	-0.00991178	0.444334	0.145817
1_DNTAG0495	1	YBR286W	APE3	DNTAG0495	-0.0882327	-0.167202	-0.265308	0.0875085
1_DNTAG0496	1	YKL103C	APE1	DNTAG0496	-0.151586	-0.0322803	-0.244498	0.0540814
1_DNTAG0497	1	YPR079W	MRL1	DNTAG0497	-0.122576	-0.178601	-0.311478	0.11029
1_DNTAG0498	1	YHR138C	YHR138C	DNTAG0498	0.0511172	-0.0183781	0.0238378	0.136943
1_DNTAG0499	1	YER072W	VTC1	DNTAG0499	-0.123079	0.147228	-0.0219571	-0.123057
1_DNTAG0500	1	YPL019C	VTC3	DNTAG0500	-0.179526	0.12741	-0.0795448	-0.0561112
1_DNTAG0502	1	YNL015W	PBI2	DNTAG0502	0.159324	-0.0669421	0.0656799	0.152643
1_DNTAG0503	1	YFL004W	VTC2	DNTAG0503	-0.108165	0.210707	0.0753062	-0.0660911
1_DNTAG0504	1	YNL054W	VAC7	DNTAG0504	0.144242	0.350715	0.441942	-0.0467742
1_DNTAG0505	1	YLR386W	VAC14	DNTAG0505	0.326275	-0.014764	0.30703	-0.521571
1_DNTAG0506	1	YDL077C	VAM6	DNTAG0506	-0.108188	0.0774925	-0.0966345	0.214015
1_DNTAG0508	1	YOL018C	TLG2	DNTAG0508	0.140604	-0.14083	-0.00830706	-0.108212
1_DNTAG0509	1	YLR093C	NYV1	DNTAG0509	0.399571	0.122283	0.509113	0.196399
1_DNTAG0510	1	YDR323C	PEP7	DNTAG0510	0.277599	0.28046	0.546786	-0.163136
1_DNTAG0513	1	YPL232W	SSO1	DNTAG0513	0.0125486	0.0680332	0.0786096	-0.251716
1_DNTAG0514	1	YOR106W	VAM3	DNTAG0514	0.234824	-0.107133	0.0907308	0.125592
1_DNTAG0515	1	YGL212W	VAM7	DNTAG0515	0.155348	0.0648238	0.185986	0.07334
1_DNTAG0516	1	YAR031W	PRM9	DNTAG0516	0.00364136	-0.284891	-0.29973	0.0562411
1_DNTAG0517	1	YJL178C	ATG27	DNTAG0517	-0.110469	-0.0086859	-0.129007	0.0855019
1_DNTAG0518	1	YKL135C	APL2	DNTAG0518	0.332841	-0.262674	0.0350589	0.241763
1_DNTAG0520	1	YPL259C	APM1	DNTAG0520	-0.137585	0.183386	0.0348064	-0.0920732
1_DNTAG0521	1	YHL019C	APM2	DNTAG0521	0.130002	0.143798	0.268255	0.0116685
1_DNTAG0522	1	YLR170C	APS1	DNTAG0522	0.0431332	-0.019806	0.00733588	-0.0235673
1_DNTAG0523	1	YJR005W	APL1	DNTAG0523	0.030074	0.0188472	0.0350973	-9.31641e-06
1_DNTAG0524	1	YBL037W	APL3	DNTAG0524	-0.107694	0.113557	-0.011035	-0.0215666
1_DNTAG0525	1	YJR058C	APS2	DNTAG0525	-0.233915	0.0416706	-0.205318	-0.0192663
1_DNTAG0529	1	YLR309C	IMH1	DNTAG0529	0.265999	-0.148169	0.107703	-0.151839
1_DNTAG0530	1	YPL249C	GYP5	DNTAG0530	-0.195785	-0.179125	-0.385881	0.119802
1_DNTAG0531	1	YPR028W	YOP1	DNTAG0531	0.0610997	-0.13365	-0.0845081	-0.0207773
1_DNTAG0533	1	YAL048C	GEM1	DNTAG0533	0.076899	-0.354469	-0.301238	0.42894
1_DNTAG0535	1	YGL023C	PIB2	DNTAG0535	0.00132345	-0.0279671	-0.044941	0.159227
1_DNTAG0536	1	YJR110W	YMR1	DNTAG0536	-0.152096	-0.0366399	-0.206916	0.218408
1_DNTAG0537	1	YPL145C	KES1	DNTAG0537	0.157364	-0.0310997	0.112638	0.197627
1_DNTAG0538	1	YCR034W	ELO2	DNTAG0538	0.319618	-0.267248	0.0426621	0.600323
1_DNTAG0539	1	YBR105C	VID24	DNTAG0539	0.137911	-0.140638	-0.0150961	0.169463
1_DNTAG0540	1	YER031C	YPT31	DNTAG0540	0.10935	0.0421444	0.141557	-0.199814
1_DNTAG0541	1	YGL210W	YPT32	DNTAG0541	-0.0225182	-0.0320396	-0.0637716	-0.0432455
1_DNTAG0543	1	YKL176C	LST4	DNTAG0543	0.00841997	-0.0494175	-0.0464233	0.0632441
1_DNTAG0544	1	YGR057C	LST7	DNTAG0544	-0.0565845	-0.124775	-0.177729	0.289583
1_DNTAG0577	1	YBL015W	ACH1	DNTAG0577	-0.0897615	-0.0741817	-0.168497	-0.129774
1_DNTAG0578	1	YGR268C	HUA1	DNTAG0578	-0.0979758	-0.0167633	-0.124424	0.136733
1_DNTAG0579	1	YOR284W	HUA2	DNTAG0579	-0.146431	-0.0286274	-0.184216	0.099983
1_DNTAG0580	1	YLR144C	ACF2	DNTAG0580	0.189738	-0.0179156	0.162432	-0.189972
1_DNTAG0581	1	YJR083C	ACF4	DNTAG0581	0.10228	-0.356971	-0.281874	0.467851
1_DNTAG0582	1	YLR410W	VIP1	DNTAG0582	0.0318392	-0.225206	-0.206939	-0.291597
1_DNTAG0583	1	YPR154W	PIN3	DNTAG0583	0.127443	0.107131	0.216729	-0.0256452
1_DNTAG0584	1	YJL020C	BBC1	DNTAG0584	-0.055982	0.176242	0.110218	-0.123172
1_DNTAG0586	1	YNL047C	SLM2	DNTAG0586	-0.221562	-0.0473058	-0.276503	0.194393
1_DNTAG0587	1	YOR239W	ABP140	DNTAG0587	-0.0358041	0.0437994	-0.01328	0.0377163
1_DNTAG0589	1	YOR035C	SHE4	DNTAG0589	0.500694	-0.399982	-0.00829307	0.593297
1_DNTAG0590	1	YBR059C	AKL1	DNTAG0590	-0.118648	0.180115	0.04692	-0.328671
1_DNTAG0591	1	YJL100W	LSB6	DNTAG0591	0.0262522	-0.0368367	-0.0169071	0.0916825
1_DNTAG0593	1	YFR024C-A	LSB3	DNTAG0593	-0.133952	-0.00980352	-0.151276	0.0250387
1_DNTAG0594	1	YOL112W	MSB4	DNTAG0594	0.0636645	-0.0235002	0.0308587	-0.0780441
1_DNTAG0596	1	YNL079C	TPM1	DNTAG0596	0.193878	-0.355482	-0.169196	0.214582
1_DNTAG0597	1	YIL138C	TPM2	DNTAG0597	0.0471044	0.0358426	0.0748352	0.0698965
1_DNTAG0598	1	YDR245W	MNN10	DNTAG0598	0.800411	-0.23039	0.4647	0.352745
1_DNTAG0599	1	YIL159W	BNR1	DNTAG0599	0.0736712	0.0627166	0.119165	0.112878
1_DNTAG0600	1	YLR319C	BUD6	DNTAG0600	0.0291686	-0.1121	-0.109553	0.0511938
1_DNTAG0601	1	YER149C	PEA2	DNTAG0601	0.099653	0.207686	0.277051	-0.00248703
1_DNTAG0602	1	YNL271C	BNI1	DNTAG0602	0.284906	-0.120637	0.154029	0.157478
1_DNTAG0603	1	YLL021W	SPA2	DNTAG0603	0.102846	0.0197821	0.110338	-0.0171668
1_DNTAG0604	1	YLR313C	SPH1	DNTAG0604	-0.129385	0.141024	0.00402342	-0.00705881
1_DNTAG0605	1	YKR055W	RHO4	DNTAG0605	-0.229268	-0.120888	-0.360084	0.0907904
1_DNTAG0606	1	YNL094W	APP1	DNTAG0606	-0.0679433	0.0115759	-0.0769449	-0.00223922
1_DNTAG0607	1	YHR114W	BZZ1	DNTAG0607	0.115225	-0.140131	-0.027411	-0.00611057
1_DNTAG0608	1	YNL084C	END3	DNTAG0608	0.299909	-0.311493	-0.032913	0.402087
1_DNTAG0609	1	YLR429W	CRN1	DNTAG0609	0.153835	-0.269141	-0.134979	-0.00952283
1_DNTAG0610	1	YOR367W	SCP1	DNTAG0610	0.106252	0.0982503	0.194359	-0.0380954
1_DNTAG0611	1	YDR129C	SAC6	DNTAG0611	1.16862	-0.442387	0.616142	0.0978003
1_DNTAG0612	1	YDL135C	RDI1	DNTAG0612	-0.0141082	0.0937558	0.0722921	0.0031534
1_DNTAG0613	1	YOR127W	RGA1	DNTAG0613	-0.204074	0.791408	0.564336	-1.00141
1_DNTAG0614	1	YDR379W	RGA2	DNTAG0614	0.257242	-0.224687	0.0275963	-0.0369227
1_DNTAG0615	1	YLR370C	ARC18	DNTAG0615	0.436672	-0.303542	0.12325	0.278684
1_DNTAG0616	1	YJR084W	YJR084W	DNTAG0616	-0.502531	0.422578	-0.157832	-0.258116
1_DNTAG0617	1	YDL216C	RRI1	DNTAG0617	0.240041	-0.224923	0.00164832	0.166858
1_DNTAG0618	1	YMR025W	CSI1	DNTAG0618	-0.193	0.129445	-0.0826209	-0.0917741
1_DNTAG0619	1	YDR179C	CSN9	DNTAG0619	-0.100504	0.000208224	-0.105266	0.0206015
1_DNTAG0620	1	YOL117W	RRI2	DNTAG0620	0.260593	-0.0598383	0.189518	-0.10161
1_DNTAG0621	1	YNR044W	AGA1	DNTAG0621	0.000659169	0.130742	0.121412	-0.0650389
1_DNTAG0622	1	YGL032C	AGA2	DNTAG0622	0.000410886	-0.0366065	-0.048618	-0.262454
1_DNTAG0623	1	YJR004C	SAG1	DNTAG0623	0.0539845	0.157869	0.20218	-0.186581
1_DNTAG0624	1	YLR423C	ATG17	DNTAG0624	0.105078	0.155671	0.250285	0.0215161
1_DNTAG0625	1	YGL180W	ATG1	DNTAG0625	0.0502089	-0.0652033	-0.0244813	0.00689817
1_DNTAG0626	1	YBR210W	ERV15	DNTAG0626	-0.0112346	-0.15195	-0.172961	-0.0304755
1_DNTAG0627	1	YKL007W	CAP1	DNTAG0627	0.196654	-0.101069	0.0740097	0.0722346
1_DNTAG0628	1	YIL034C	CAP2	DNTAG0628	0.0474376	-0.19388	-0.159479	0.299467
1_DNTAG0629	1	YDL049C	KNH1	DNTAG0629	0.147054	-0.0508916	0.088473	-0.08173
1_DNTAG0630	1	YMR306W	FKS3	DNTAG0630	-0.214256	0.14032	-0.0861339	0.222186
1_DNTAG0631	1	YMR215W	GAS3	DNTAG0631	-0.210155	0.169409	-0.0505186	-0.0575593
1_DNTAG0632	1	YOL132W	GAS4	DNTAG0632	0.110301	-0.119797	-0.0345339	-0.0173026
1_DNTAG0633	1	YOL030W	GAS5	DNTAG0633	-0.0443064	0.147989	0.0830157	0.18123
1_DNTAG0634	1	YLR343W	GAS2	DNTAG0634	0.0943812	0.235006	0.303764	-0.075081
1_DNTAG0635	1	YIR003W	AIM21	DNTAG0635	0.142867	-0.157128	-0.0263928	0.308193
1_DNTAG0636	1	YKR100C	SKG1	DNTAG0636	-0.192516	-0.0425443	-0.241812	0.00401488
1_DNTAG0637	1	YNL087W	TCB2	DNTAG0637	0.0419882	-0.0655849	-0.0329377	0.0627338
1_DNTAG0638	1	YMR295C	YMR295C	DNTAG0638	0.170213	0.0395352	0.184059	-0.143283
1_DNTAG0639	1	YOR264W	DSE3	DNTAG0639	-0.0605899	0.2913	0.204492	0.105413
1_DNTAG0640	1	YDR348C	PAL1	DNTAG0640	-0.218185	0.399694	0.215977	-0.0384385
1_DNTAG0641	1	YPL158C	AIM44	DNTAG0641	-0.185502	0.292168	0.0700283	0.0513341
1_DNTAG0642	1	YPL221W	FLC1	DNTAG0642	-0.17059	-0.145761	-0.349482	0.32998
1_DNTAG0643	1	YHR149C	SKG6	DNTAG0643	0.209546	0.0503017	0.231821	0.0301523
1_DNTAG0644	1	YCR030C	SYP1	DNTAG0644	0.282325	0.091193	0.368161	0.246332
1_DNTAG0645	1	YLR037C	PAU23	DNTAG0645	0.183059	-0.0956299	0.0674102	0.0241438
1_DNTAG0646	1	YBR301W	PAU24	DNTAG0646	-0.0437924	0.175801	0.122738	0.100698
1_DNTAG0647	1	YJR151C	DAN4	DNTAG0647	-0.087631	0.0503391	-0.0470575	0.00235001
1_DNTAG0648	1	YJL078C	PRY3	DNTAG0648	0.0315916	0.3413	0.355498	-0.126508
1_DNTAG0649	1	YDL037C	BSC1	DNTAG0649	-0.110778	0.0713236	-0.0495293	0.27808
1_DNTAG0650	1	YNR069C	BSC5	DNTAG0650	0.00894959	0.0682038	0.0456221	-0.232958
1_DNTAG0651	1	YLR213C	CRR1	DNTAG0651	0.0425287	0.183346	0.20238	0.0996826
1_DNTAG0652	1	YBR033W	EDS1	DNTAG0652	0.0688899	-0.00419783	0.0267899	-0.00175538
1_DNTAG0654	1	YLR099C	ICT1	DNTAG0654	0.0882524	0.0562665	0.133272	-0.047524
1_DNTAG0656	1	YBL066C	SEF1	DNTAG0656	-0.0195505	-0.0978696	-0.124713	0.0510116
1_DNTAG0657	1	YFR022W	ROG3	DNTAG0657	-0.0923837	0.114718	0.0141005	0.00916686
1_DNTAG0658	1	YGL015C	YGL015C	DNTAG0658	-0.137352	0.261721	0.110201	-0.079654
1_DNTAG0659	1	YGL196W	DSD1	DNTAG0659	-0.199878	0.133766	-0.0791818	0.0151951
1_DNTAG0660	1	YJL046W	AIM22	DNTAG0660	0.0814612	-0.182314	-0.112008	-0.0395365
1_DNTAG0662	1	YKL037W	AIM26	DNTAG0662	0.116462	0.112043	0.216554	-0.490722
1_DNTAG0663	1	YLR021W	IRC25	DNTAG0663	0.0288868	-0.151159	-0.172344	0.0503791
1_DNTAG0666	1	YOL003C	PFA4	DNTAG0666	0.0776678	0.0379299	0.115664	-0.00756281
1_DNTAG0667	1	YPL041C	MRX11	DNTAG0667	-0.0737116	0.282604	0.197515	-0.164494
1_DNTAG0668	1	YPL077C	YPL077C	DNTAG0668	-0.0200952	-0.0189294	-0.0625513	-0.0793569
1_DNTAG0669	1	YBR148W	YSW1	DNTAG0669	0.156197	-0.118493	0.0276276	-0.229899
1_DNTAG0670	1	YGL110C	CUE3	DNTAG0670	0.00618454	0.00754556	-0.00247656	-0.307782
1_DNTAG0671	1	YOR042W	CUE5	DNTAG0671	0.0784089	-0.0308991	0.0279517	0.152722
1_DNTAG0672	1	YAL053W	FLC2	DNTAG0672	0.0583848	0.0123584	0.0621581	-0.0119242
1_DNTAG0673	1	YDR248C	YDR248C	DNTAG0673	0.0836168	0.0308094	0.0984333	-0.0279096
1_DNTAG0674	1	YEL020C	YEL020C	DNTAG0674	0.10534	-0.146798	-0.0556809	-0.0213788
1_DNTAG0675	1	YGR237C	YGR237C	DNTAG0675	-0.307439	0.110869	-0.20145	0.106299
1_DNTAG0676	1	YHR033W	YHR033W	DNTAG0676	0.0828986	-0.120345	-0.0552025	0.0197776
1_DNTAG0677	1	YML131W	YML131W	DNTAG0677	-0.269594	0.39824	0.122384	-0.22328
1_DNTAG0678	1	YMR073C	IRC21	DNTAG0678	0.426043	-0.108706	0.3066	0.0726696
1_DNTAG0679	1	YMR124W	EPO1	DNTAG0679	-0.0482301	0.0072702	-0.0522001	0.0715278
1_DNTAG0680	1	YNL040W	YNL040W	DNTAG0680	-0.104762	0.166282	0.0512603	-0.0431802
1_DNTAG0681	1	YJR055W	HIT1	DNTAG0681	0.50809	-0.422342	0.0747453	0.518832
1_DNTAG0682	1	YGR136W	LSB1	DNTAG0682	-0.163739	0.0890722	-0.0817253	0.0761053
1_DNTAG0683	1	YBR238C	YBR238C	DNTAG0683	-0.0496428	0.18354	0.122935	-0.230121
1_DNTAG0685	1	YLR414C	PUN1	DNTAG0685	-0.0400398	-0.0976085	-0.144635	-0.0456001
1_DNTAG0686	1	YOL070C	NBA1	DNTAG0686	-0.0461701	0.0244138	-0.0311556	0.0512486
1_DNTAG0687	1	YOR304C-A	BIL1	DNTAG0687	-0.0871985	-0.168207	-0.273574	-0.102379
1_DNTAG0688	1	YJL079C	PRY1	DNTAG0688	0.793806	0.199129	0.739173	-0.877923
1_DNTAG0689	1	YDR185C	UPS3	DNTAG0689	0.0374769	0.236845	0.26419	-0.484754
1_DNTAG0690	1	YDR233C	RTN1	DNTAG0690	-0.0927721	0.230986	0.102659	-0.100212
1_DNTAG0691	1	YBR054W	YRO2	DNTAG0691	-0.151019	0.300921	0.156937	0.0799828
1_DNTAG0692	1	YDR314C	RAD34	DNTAG0692	0.0348098	-0.0721875	-0.0514467	0.327717
1_DNTAG0693	1	YPR045C	THP3	DNTAG0693	0.0169657	0.0827378	0.0600812	-0.136774
1_DNTAG0694	1	YBL028C	YBL028C	DNTAG0694	-0.405496	0.378459	-0.0526885	-0.30468
1_DNTAG0695	1	YMR195W	ICY1	DNTAG0695	0.300597	0.139842	0.340802	-0.457153
1_DNTAG0696	1	YKL161C	KDX1	DNTAG0696	0.0912438	-0.120762	-0.077107	0.857642
1_DNTAG0697	1	YML117W	NAB6	DNTAG0697	-0.0224554	-0.200282	-0.230439	0.0217474
1_DNTAG0698	1	YIL110W	HPM1	DNTAG0698	-0.257186	0.318844	0.0299193	-0.266329
1_DNTAG0699	1	YNL063W	MTQ1	DNTAG0699	-0.200897	0.0260352	-0.185314	-0.0624952
1_DNTAG0700	1	YDL178W	DLD2	DNTAG0700	0.0321212	0.234523	0.251083	0.0928999
1_DNTAG0701	1	YGR080W	TWF1	DNTAG0701	-0.197522	0.195892	-0.0124567	0.0695919
1_DNTAG0702	1	YGR152C	RSR1	DNTAG0702	0.165057	-0.0208039	0.138012	0.137314
1_DNTAG0703	1	YKL092C	BUD2	DNTAG0703	-0.0580087	0.112642	0.0447057	-0.00424987
1_DNTAG0704	1	YGR041W	BUD9	DNTAG0704	0.0988263	-0.0695319	0.0189844	-0.160036
1_DNTAG0705	1	YEL029C	BUD16	DNTAG0705	0.033188	0.0730501	0.103799	0.385059
1_DNTAG0706	1	YFL023W	BUD27	DNTAG0706	1.21949	-0.333428	0.871151	0.583339
1_DNTAG0707	1	YNR027W	BUD17	DNTAG0707	-0.13117	0.287642	0.134832	-0.173311
1_DNTAG0708	1	YOR301W	RAX1	DNTAG0708	0.0387708	0.196333	0.227206	0.0931905
1_DNTAG0709	1	YLR084C	RAX2	DNTAG0709	0.166701	-0.156245	-0.0165472	-0.0509892
1_DNTAG0710	1	YGL174W	BUD13	DNTAG0710	0.719721	-0.220469	0.487804	0.580275
1_DNTAG0712	1	YMR014W	BUD22	DNTAG0712	0.468611	-0.0299365	0.453863	-0.151056
1_DNTAG0714	1	YJR092W	BUD4	DNTAG0714	-0.098027	0.085316	-0.0157287	0.00242417
1_DNTAG0715	1	YPR122W	AXL1	DNTAG0715	-0.143786	0.0171991	-0.133436	0.0824014
1_DNTAG0716	1	YIL140W	AXL2	DNTAG0716	0.0699069	0.0773905	0.127952	-0.22389
1_DNTAG0717	1	YCR063W	BUD31	DNTAG0717	0.0217378	-0.0678744	-0.0939773	-0.407988
1_DNTAG0718	1	YGR221C	TOS2	DNTAG0718	0.0756956	0.0547809	0.12297	-0.254394
1_DNTAG0720	1	YKL159C	RCN1	DNTAG0720	0.0679019	-0.130666	-0.075782	0.189744
1_DNTAG0721	1	YGL248W	PDE1	DNTAG0721	0.0348749	-0.0534296	-0.025121	-0.0409615
1_DNTAG0722	1	YOR360C	PDE2	DNTAG0722	0.0475544	0.0544809	0.0856953	-0.423636
1_DNTAG0723	1	YNL127W	FAR11	DNTAG0723	0.00745509	0.0934949	0.0820144	0.131384
1_DNTAG0724	1	YFR008W	FAR7	DNTAG0724	1.11643	-0.0548479	0.941823	0.093322
1_DNTAG0725	1	YMR029C	FAR8	DNTAG0725	-0.065255	0.148719	0.0244995	-0.052808
1_DNTAG0726	1	YLR238W	FAR10	DNTAG0726	-0.126278	0.127435	-0.0395542	-0.0524682
1_DNTAG0727	1	YML057W	CMP2	DNTAG0727	-0.044585	0.0711354	0.0053023	0.0892839
1_DNTAG0728	1	YBR229C	ROT2	DNTAG0728	0.176589	0.00285925	0.162596	-0.158634
1_DNTAG0729	1	YKL046C	DCW1	DNTAG0729	-0.0961242	0.299024	0.189428	-0.110482
1_DNTAG0730	1	YEL004W	YEA4	DNTAG0730	-0.0555668	0.343	0.273552	-0.10922
1_DNTAG0731	1	YBL006C	LDB7	DNTAG0731	-0.507342	-0.00207057	-0.51924	0.0589551
1_DNTAG0733	1	YLR020C	YEH2	DNTAG0733	0.034649	-0.0461287	-0.0196616	-0.0984238
1_DNTAG0734	1	YJR075W	HOC1	DNTAG0734	0.0348822	-0.0597514	-0.0361759	0.187144
1_DNTAG0735	1	YMR307W	GAS1	DNTAG0735	0.562351	-0.395221	0.147734	0.421168
1_DNTAG0736	1	YGR282C	BGL2	DNTAG0736	0.0264382	-0.0333485	-0.0334406	0.0409868
1_DNTAG0737	1	YDR261C	EXG2	DNTAG0737	0.00654798	0.326702	0.323058	-0.269734
1_DNTAG0738	1	YGL027C	CWH41	DNTAG0738	0.125558	-0.313719	-0.21247	0.326764
1_DNTAG0739	1	YER124C	DSE1	DNTAG0739	0.129439	-0.220145	-0.100835	0.056718
1_DNTAG0740	1	YDR055W	PST1	DNTAG0740	-0.0935794	0.0304645	-0.0686848	0.0102203
1_DNTAG0741	1	YEL040W	UTR2	DNTAG0741	-0.0834791	-0.0665567	-0.168985	-0.0666495
1_DNTAG0742	1	YHR021W-A	ECM12	DNTAG0742	-0.344097	0.319484	-0.0253134	-0.0725067
1_DNTAG0743	1	YBL043W	ECM13	DNTAG0743	0.186443	-0.11733	0.0589593	-0.310352
1_DNTAG0744	1	YLR390W	ECM19	DNTAG0744	-0.0220923	-0.000958499	-0.0323755	-0.0611112
1_DNTAG0745	1	YJR106W	ECM27	DNTAG0745	-0.107567	0.0997211	-0.0312198	0.0316611
1_DNTAG0746	1	YHL043W	ECM34	DNTAG0746	0.0922823	-0.060712	0.0211676	0.0929306
1_DNTAG0747	1	YIL146C	ATG32	DNTAG0747	0.151006	0.0187062	0.155753	0.00314406
1_DNTAG0748	1	YJL201W	ECM25	DNTAG0748	-0.174405	0.0196316	-0.186031	-0.35307
1_DNTAG0750	1	YDR528W	HLR1	DNTAG0750	0.0298028	0.0341046	0.0516355	0.0527028
1_DNTAG0751	1	YHR103W	SBE22	DNTAG0751	0.239583	0.0984718	0.323602	-0.0859525
1_DNTAG0752	1	YBL001C	ECM15	DNTAG0752	-0.00590324	0.187047	0.174379	0.0256065
1_DNTAG0753	1	YDR351W	SBE2	DNTAG0753	-0.0939908	-0.126068	-0.230324	0.135691
1_DNTAG0754	1	YBR005W	RCR1	DNTAG0754	-0.0682506	0.11475	0.038486	-0.0284892
1_DNTAG0755	1	YLR443W	ECM7	DNTAG0755	-0.392069	0.149924	-0.264986	0.0249472
1_DNTAG0756	1	YGR023W	MTL1	DNTAG0756	-0.260741	0.10077	-0.172488	-0.0239141
1_DNTAG0758	1	YBR078W	ECM33	DNTAG0758	0.0647527	-0.119038	-0.0651762	0.0760223
1_DNTAG0759	1	YDR446W	ECM11	DNTAG0759	0.000716634	-0.0626298	-0.0740399	0.0299043
1_DNTAG0760	1	YHR132C	ECM14	DNTAG0760	0.168233	0.0519426	0.217998	-0.0419669
1_DNTAG0761	1	YDR293C	SSD1	DNTAG0761	-0.0754896	-0.10652	-0.19835	0.15714
1_DNTAG0762	1	YKL096W	CWP1	DNTAG0762	-0.0968527	0.128037	0.0260357	0.0162073
1_DNTAG0763	1	YJL159W	HSP150	DNTAG0763	0.0278846	-0.0720873	-0.0546455	-0.0598114
1_DNTAG0764	1	YNL322C	KRE1	DNTAG0764	0.112323	-0.0351125	0.067037	-0.0576486
1_DNTAG0765	1	YKL163W	PIR3	DNTAG0765	-0.13732	0.272981	0.125272	-0.125037
1_DNTAG0766	1	YDR077W	SED1	DNTAG0766	-0.180362	0.0408876	-0.148614	-0.0125974
1_DNTAG0767	1	YJL158C	CIS3	DNTAG0767	-0.035879	0.0609167	0.015885	0.0718017
1_DNTAG0768	1	YLR390W-A	CCW14	DNTAG0768	-0.10587	0.192987	0.0812071	-0.0456356
1_DNTAG0769	1	YBR067C	TIP1	DNTAG0769	-0.151755	0.0702061	-0.0925011	0.0611537
1_DNTAG0770	1	YGR032W	GSC2	DNTAG0770	-0.0297991	-0.045421	-0.0896431	0.105987
1_DNTAG0771	1	YLR342W	FKS1	DNTAG0771	0.0886418	-0.194013	-0.110707	0.23327
1_DNTAG0772	1	YLR433C	CNA1	DNTAG0772	-0.116025	0.268645	0.145257	0.065647
1_DNTAG0773	1	YKL190W	CNB1	DNTAG0773	-0.104397	0.0733197	-0.0455518	-0.119034
1_DNTAG0774	1	YLR300W	EXG1	DNTAG0774	-0.000152571	0.208194	0.197338	0.130972
1_DNTAG0775	1	YHR143W	DSE2	DNTAG0775	-0.543449	0.236987	-0.30621	-0.00787047
1_DNTAG0776	1	YGR143W	SKN1	DNTAG0776	0.0224573	0.320544	0.337552	-0.117027
1_DNTAG0777	1	YPR159W	KRE6	DNTAG0777	0.172035	-0.0555403	0.105702	0.38196
1_DNTAG0778	1	YNL090W	RHO2	DNTAG0778	-0.330052	-0.0228295	-0.376184	0.0329459
1_DNTAG0780	1	YPL053C	KTR6	DNTAG0780	0.125913	-0.00406885	0.110336	-0.0817661
1_DNTAG0781	1	YNL029C	KTR5	DNTAG0781	-0.0670484	-0.087759	-0.165495	0.17702
1_DNTAG0782	1	YIL085C	KTR7	DNTAG0782	-0.244888	0.0984058	-0.15591	-0.01465
1_DNTAG0783	1	YBR205W	KTR3	DNTAG0783	-0.0430904	0.027184	-0.0290093	0.0024817
1_DNTAG0784	1	YHR030C	SLT2	DNTAG0784	-0.0596461	0.0147104	-0.0550661	-0.0940192
1_DNTAG0785	1	YCR017C	CWH43	DNTAG0785	-0.167798	0.0976112	-0.0829915	0.0198602
1_DNTAG0786	1	YLR110C	CCW12	DNTAG0786	-0.0337283	0.238993	0.169726	-0.0951616
1_DNTAG0787	1	YOL109W	ZEO1	DNTAG0787	0.00821652	0.217019	0.2188	-0.221899
1_DNTAG0788	1	YGR229C	SMI1	DNTAG0788	0.202985	-0.23986	-0.0476484	0.050669
1_DNTAG0789	1	YDR420W	HKR1	DNTAG0789	0.0646919	-0.167529	-0.127965	-0.0179855
1_DNTAG0790	1	YCL048W	SPS22	DNTAG0790	-0.01497	-0.128326	-0.151597	-0.101492
1_DNTAG0791	1	YGL178W	MPT5	DNTAG0791	0.217325	-0.0105928	0.139762	-0.0165267
1_DNTAG0793	1	YBL007C	SLA1	DNTAG0793	0.940649	-0.568316	0.373364	0.0931935
1_DNTAG0795	1	YLR425W	TUS1	DNTAG0795	0.0866673	-0.250912	-0.173025	0.202138
1_DNTAG0796	1	YLR371W	ROM2	DNTAG0796	-0.0446485	-0.153322	-0.218479	0.410644
1_DNTAG0797	1	YGR070W	ROM1	DNTAG0797	0.0232549	0.0573919	0.0703562	0.233964
1_DNTAG0798	1	YER155C	BEM2	DNTAG0798	0.971996	-0.181959	0.719754	0.0738478
1_DNTAG0799	1	YKL096W-A	CWP2	DNTAG0799	0.152273	-0.0498645	0.0881085	0.0366636
1_DNTAG0800	1	YKL164C	PIR1	DNTAG0800	-0.116054	-0.0154341	-0.135285	0.215085
1_DNTAG0801	1	YGR059W	SPR3	DNTAG0801	0.0200196	0.181863	0.191018	0.0789822
1_DNTAG0802	1	YDR218C	SPR28	DNTAG0802	0.054161	0.0881325	0.0992374	-0.0636777
1_DNTAG0803	1	YJR137C	MET5	DNTAG0803	-0.11942	0.134145	0.00567486	-0.000498115
1_DNTAG0804	1	YCL051W	LRE1	DNTAG0804	0.149926	-0.0396229	0.0995556	0.0241631
1_DNTAG0805	1	YNL283C	WSC2	DNTAG0805	0.421787	-0.113306	0.292796	-0.131545
1_DNTAG0806	1	YHL028W	WSC4	DNTAG0806	0.0476904	0.143464	0.154853	0.0595632
1_DNTAG0807	1	YLR332W	MID2	DNTAG0807	-0.00182663	0.132026	0.10959	0.100259
1_DNTAG0808	1	YOL105C	WSC3	DNTAG0808	-0.0336214	0.142499	0.0930539	-0.191393
1_DNTAG0809	1	YOR008C	SLG1	DNTAG0809	0.0266292	-0.0699376	-0.110516	0.409546
1_DNTAG0811	1	YDL223C	HBT1	DNTAG0811	0.0281541	-0.154711	-0.138079	0.0321495
1_DNTAG0812	1	YNL325C	FIG4	DNTAG0812	-0.260683	0.0566027	-0.229433	0.00723937
1_DNTAG0813	1	YCR089W	FIG2	DNTAG0813	-0.332168	0.0932778	-0.247893	0.207837
1_DNTAG0814	1	YBR040W	FIG1	DNTAG0814	0.112328	0.0194721	0.115877	-0.124854
1_DNTAG0815	1	YNR032C-A	HUB1	DNTAG0815	-0.151986	0.206677	0.0417752	-0.196053
1_DNTAG0816	1	YAR014C	BUD14	DNTAG0816	-0.0668443	-0.0470559	-0.124946	0.188515
1_DNTAG0817	1	YHR158C	KEL1	DNTAG0817	0.054348	0.0135174	0.0484871	-0.072151
1_DNTAG0818	1	YNL233W	BNI4	DNTAG0818	-0.37938	0.421171	0.0476302	-0.0926815
1_DNTAG0819	1	YMR022W	UBC7	DNTAG0819	0.109456	-0.00862827	0.0737391	0.00181447
1_DNTAG0820	1	YGR279C	SCW4	DNTAG0820	0.0328021	0.0783752	0.100132	-0.148203
1_DNTAG0821	1	YMR305C	SCW10	DNTAG0821	0.0634949	-0.0149543	0.0409874	-0.0513664
1_DNTAG0822	1	YGR238C	KEL2	DNTAG0822	-0.0062613	-0.238323	-0.260118	0.24448
1_DNTAG0823	1	YBR129C	OPY1	DNTAG0823	0.0281698	-0.155316	-0.132047	0.0813975
1_DNTAG0824	1	YJL108C	PRM10	DNTAG0824	-0.208743	0.117568	-0.101543	-0.0307056
1_DNTAG0825	1	YIL037C	PRM2	DNTAG0825	0.0639831	0.0465531	0.10043	-0.119779
1_DNTAG0826	1	YPL156C	PRM4	DNTAG0826	-0.0838277	-0.0626291	-0.153936	0.10854
1_DNTAG0827	1	YIL117C	PRM5	DNTAG0827	-0.197679	0.156567	-0.055436	-0.289063
1_DNTAG0828	1	YML047C	PRM6	DNTAG0828	-0.114656	-0.0208344	-0.151204	-0.0387432
1_DNTAG0830	1	YJL170C	ASG7	DNTAG0830	0.130561	-0.169707	-0.0625539	-0.0825708
1_DNTAG0831	1	YCL027W	FUS1	DNTAG0831	-0.242634	0.404341	0.135126	-0.403958
1_DNTAG0832	1	YKL032C	IXR1	DNTAG0832	0.359587	-0.0508352	0.296907	-0.0836047
1_DNTAG0833	1	YOR067C	ALG8	DNTAG0833	0.0836184	0.310556	0.350984	-0.614077
1_DNTAG0834	1	YMR015C	ERG5	DNTAG0834	-0.100955	0.0505002	-0.0832638	-0.124511
1_DNTAG0835	1	YLR056W	ERG3	DNTAG0835	0.27284	0.0101335	0.266564	0.0910037
1_DNTAG0838	1	YGL012W	ERG4	DNTAG0838	-0.143515	-0.537344	-0.698128	0.376882
1_DNTAG0839	1	YML075C	HMG1	DNTAG0839	0.0469609	0.100031	0.130244	-0.259213
1_DNTAG0840	1	YLR450W	HMG2	DNTAG0840	-0.101853	-0.0273235	-0.138166	0.0586098
1_DNTAG0841	1	YER044C	ERG28	DNTAG0841	0.777205	-0.381881	0.352963	0.678055
1_DNTAG0842	1	YML008C	ERG6	DNTAG0842	-0.248454	0.191858	-0.0820821	-0.0389231
1_DNTAG0843	1	YOR188W	MSB1	DNTAG0843	0.210951	-0.0552257	0.139984	-0.109934
1_DNTAG0844	1	YPL161C	BEM4	DNTAG0844	0.577753	-0.372157	0.153186	0.249978
1_DNTAG0845	1	YML109W	ZDS2	DNTAG0845	-0.324483	0.173697	-0.169007	0.128989
1_DNTAG0846	1	YGR014W	MSB2	DNTAG0846	-0.124054	0.0179693	-0.116259	-0.206465
1_DNTAG0847	1	YBL085W	BOI1	DNTAG0847	-0.279934	0.421635	0.11153	-0.269589
1_DNTAG0848	1	YER114C	BOI2	DNTAG0848	0.117232	0.00206012	0.110106	-0.09632
1_DNTAG0849	1	YBR200W	BEM1	DNTAG0849	-0.46525	0.178566	-0.306881	0.0955096
1_DNTAG0850	1	YCR088W	ABP1	DNTAG0850	0.0781233	0.157759	0.218629	-0.212996
1_DNTAG0851	1	YMR273C	ZDS1	DNTAG0851	0.0339903	-0.0318843	-0.00806156	-0.051825
1_DNTAG0852	1	YPL115C	BEM3	DNTAG0852	-0.131441	0.162129	0.0201416	0.0891004
1_DNTAG0853	1	YHR061C	GIC1	DNTAG0853	0.0114304	-0.0311364	-0.0290575	0.0747176
1_DNTAG0854	1	YDR309C	GIC2	DNTAG0854	0.0868521	0.0402741	0.112055	-0.0904791
1_DNTAG0856	1	YAR050W	FLO1	DNTAG0856	-0.0345239	-0.0072638	-0.0417312	0.0527282
1_DNTAG0857	1	YKR102W	FLO10	DNTAG0857	-0.0835484	0.078971	-0.013428	-0.0401513
1_DNTAG0858	1	YHR211W	FLO5	DNTAG0858	-0.0868315	0.26929	0.176793	0.00850675
1_DNTAG0859	1	YAL063C	FLO9	DNTAG0859	0.0234237	-0.122566	-0.11501	-0.0381399
1_DNTAG0860	1	YLR299W	ECM38	DNTAG0860	-0.115757	0.136169	0.0111847	-0.0284836
1_DNTAG0861	1	YPL180W	TCO89	DNTAG0861	0.180744	-0.363742	-0.194281	0.787753
1_DNTAG0862	1	YJL062W	LAS21	DNTAG0862	0.166206	-0.136515	0.0199393	0.0619223
1_DNTAG0863	1	YOR107W	RGS2	DNTAG0863	-0.145422	0.0716983	-0.0837278	0.0678203
1_DNTAG0864	1	YKL130C	SHE2	DNTAG0864	0.0659397	0.192042	0.235101	-0.219926
1_DNTAG0865	1	YAL029C	MYO4	DNTAG0865	-0.146009	0.126935	-0.0289384	-0.0970538
1_DNTAG0866	1	YBR130C	SHE3	DNTAG0866	0.104826	-0.368485	-0.27156	0.292697
1_DNTAG0867	1	YML006C	GIS4	DNTAG0867	0.187284	-0.0765049	0.0816898	0.220473
1_DNTAG0868	1	YLR094C	GIS3	DNTAG0868	-0.170998	0.0415587	-0.138789	0.0680354
1_DNTAG0870	1	YPL049C	DIG1	DNTAG0870	0.0759211	0.295692	0.339577	-0.136328
1_DNTAG0871	1	YDR480W	DIG2	DNTAG0871	0.0621708	-0.218665	-0.166096	0.340604
1_DNTAG0872	1	YGR040W	KSS1	DNTAG0872	0.00964103	0.136291	0.139915	-0.137507
1_DNTAG0873	1	YBR095C	RXT2	DNTAG0873	0.848542	0.146864	0.968487	-0.268359
1_DNTAG0874	1	YOR080W	DIA2	DNTAG0874	-0.183169	-0.087052	-0.279467	0.100848
1_DNTAG0875	1	YPL192C	PRM3	DNTAG0875	-0.0236906	0.048385	0.0237799	-0.163283
1_DNTAG0876	1	YMR065W	KAR5	DNTAG0876	0.0999637	-0.14479	-0.070361	0.102548
1_DNTAG0877	1	YMR313C	TGL3	DNTAG0877	-0.0401048	-0.109607	-0.153248	-0.000120107
1_DNTAG0879	1	YKL116C	PRR1	DNTAG0879	-0.0682446	-0.0926874	-0.169335	0.143548
1_DNTAG0881	1	YIL113W	SDP1	DNTAG0881	0.0272689	-0.0206007	-0.00334423	-0.0728719
1_DNTAG0882	1	YDR466W	PKH3	DNTAG0882	0.0267084	0.0248306	0.0416036	-0.000332877
1_DNTAG0883	1	YDL227C	HO	DNTAG0883	-0.469353	0.0095768	-0.547393	0.170487
1_DNTAG0884	1	YMR275C	BUL1	DNTAG0884	-0.166225	-0.0727481	-0.249674	0.367371
1_DNTAG0886	1	YOR320C	GNT1	DNTAG0886	-0.116467	0.097968	-0.0115718	0.128714
1_DNTAG0887	1	YGL226C-A	OST5	DNTAG0887	-0.19006	0.0144759	-0.192078	-0.0802319
1_DNTAG0888	1	YPL227C	ALG5	DNTAG0888	0.0306384	0.12691	0.157099	-0.31664
1_DNTAG0889	1	YJR131W	MNS1	DNTAG0889	-0.169448	0.234283	0.0478436	-0.08033
1_DNTAG0890	1	YBR199W	KTR4	DNTAG0890	-0.0525055	-0.0677963	-0.128665	0.423546
1_DNTAG0891	1	YEL036C	ANP1	DNTAG0891	0.277216	-0.35118	-0.0836242	0.418337
1_DNTAG0893	1	YML115C	VAN1	DNTAG0893	0.498319	-0.127952	0.254495	0.336393
1_DNTAG0895	1	YGR227W	DIE2	DNTAG0895	0.0722854	-0.166115	-0.12164	0.245777
1_DNTAG0896	1	YKR061W	KTR2	DNTAG0896	-0.27072	0.174879	-0.104526	0.0585799
1_DNTAG0897	1	YJL139C	YUR1	DNTAG0897	0.148126	-0.262749	-0.140074	0.0579131
1_DNTAG0898	1	YGR036C	CAX4	DNTAG0898	0.995321	0.0690131	1.03103	-0.509041
1_DNTAG0899	1	YGL257C	MNT2	DNTAG0899	-0.00697699	-0.0776864	-0.0943854	0.0874887
1_DNTAG0900	1	YIL014W	MNT3	DNTAG0900	-0.0235487	-0.256529	-0.337997	0.538774
1_DNTAG0901	1	YNR059W	MNT4	DNTAG0901	0.0599893	0.0507282	0.100676	0.0508594
1_DNTAG0902	1	YAL023C	PMT2	DNTAG0902	-0.000532837	0.016635	0.00902061	0.0635246
1_DNTAG0903	1	YOR321W	PMT3	DNTAG0903	0.303778	-0.381378	-0.0872198	-0.0797058
1_DNTAG0904	1	YJR143C	PMT4	DNTAG0904	-0.0720267	0.112107	0.0453739	0.0214953
1_DNTAG0905	1	YDL093W	PMT5	DNTAG0905	0.0371454	0.00608178	0.0334795	-0.317472
1_DNTAG0906	1	YGR199W	PMT6	DNTAG0906	-0.114797	0.0668786	-0.0614334	-0.0365928
1_DNTAG0907	1	YDL095W	PMT1	DNTAG0907	0.335206	-0.0964191	0.230062	-0.0588368
1_DNTAG0908	1	YDR483W	KRE2	DNTAG0908	-0.00781363	-0.218031	-0.237225	0.285654
1_DNTAG0909	1	YOR099W	KTR1	DNTAG0909	-0.21597	0.174413	-0.0523382	-0.102782
1_DNTAG0910	1	YER001W	MNN1	DNTAG0910	0.208413	0.0849872	0.280362	-0.0074001
1_DNTAG0911	1	YBR260C	RGD1	DNTAG0911	0.16944	0.20425	0.37098	-0.252482
1_DNTAG0912	1	YLR006C	SSK1	DNTAG0912	-0.117354	0.234175	0.0867149	-0.165764
1_DNTAG0913	1	YOR219C	STE13	DNTAG0913	-0.0288665	-0.0155279	-0.0543835	0.0426906
1_DNTAG0914	1	YJR117W	STE24	DNTAG0914	0.0779902	0.124872	0.195333	-0.168911
1_DNTAG0916	1	YLR133W	CKI1	DNTAG0916	-0.21404	0.182317	-0.058192	0.177495
1_DNTAG0917	1	YNL130C	CPT1	DNTAG0917	-0.154163	0.0781903	-0.111668	-0.0120488
1_DNTAG0918	1	YGR157W	CHO2	DNTAG0918	0.364989	0.112768	0.459785	0.227937
1_DNTAG0919	1	YJR073C	OPI3	DNTAG0919	0.224131	0.0556852	0.264281	-0.216259
1_DNTAG0920	1	YNL169C	PSD1	DNTAG0920	0.116267	0.0501161	0.153696	-0.173625
1_DNTAG0921	1	YGR202C	PCT1	DNTAG0921	-0.116339	-0.0902708	-0.213811	-0.00315293
1_DNTAG0923	1	YOL011W	PLB3	DNTAG0923	0.0676034	-0.0136063	0.0416438	0.0649332
1_DNTAG0924	1	YBR042C	CST26	DNTAG0924	-0.164124	0.137155	-0.039136	0.0398295
1_DNTAG0926	1	YBL011W	SCT1	DNTAG0926	-0.154787	0.0952594	-0.0759005	-0.0132683
1_DNTAG0927	1	YPR140W	TAZ1	DNTAG0927	-0.126263	0.147174	0.00889249	-0.314159
1_DNTAG0928	1	YGL126W	SCS3	DNTAG0928	0.0826615	-0.744744	-0.666724	0.225452
1_DNTAG0929	1	YBR030W	RKM3	DNTAG0929	-0.021669	-0.168616	-0.216838	0.167955
1_DNTAG0930	1	YDR503C	LPP1	DNTAG0930	0.00835371	-0.128947	-0.147038	-0.0435027
1_DNTAG0931	1	YNL279W	PRM1	DNTAG0931	-0.129562	0.2433	0.105187	-0.133408
1_DNTAG0932	1	YMR232W	FUS2	DNTAG0932	0.255817	-0.0318925	0.210446	-0.0731421
1_DNTAG0933	1	YNL053W	MSG5	DNTAG0933	0.00827533	0.0516423	0.0564215	-0.13639
1_DNTAG0934	1	YDR075W	PPH3	DNTAG0934	0.110829	0.0393399	0.127824	-0.241363
1_DNTAG0935	1	YDL006W	PTC1	DNTAG0935	0.281933	0.0127605	0.280469	0.165033
1_DNTAG0936	1	YBL056W	PTC3	DNTAG0936	-0.0301874	0.120983	0.0785276	-0.0481363
1_DNTAG0937	1	YER075C	PTP3	DNTAG0937	-0.118627	-0.838785	-0.962054	0.168719
1_DNTAG0939	1	YNL048W	ALG11	DNTAG0939	0.100816	0.0288073	0.120406	0.0110738
1_DNTAG0940	1	YBR015C	MNN2	DNTAG0940	0.0418667	0.108107	0.140207	-0.0131479
1_DNTAG0941	1	YJL186W	MNN5	DNTAG0941	-0.137561	-0.0676986	-0.215067	0.134104
1_DNTAG0943	1	YEL042W	GDA1	DNTAG0943	0.0320214	0.0100931	0.00499171	-0.00934169
1_DNTAG0944	1	YER005W	YND1	DNTAG0944	-0.00401155	0.065461	0.0387493	-0.153482
1_DNTAG0945	1	YMR101C	SRT1	DNTAG0945	0.311418	-0.0404002	0.257562	-0.113581
1_DNTAG0946	1	YBL082C	ALG3	DNTAG0946	0.00075473	0.188002	0.176202	-0.128489
1_DNTAG0947	1	YNR030W	ALG12	DNTAG0947	0.306694	-0.251258	0.0450572	-0.0910635
1_DNTAG0948	1	YEL031W	SPF1	DNTAG0948	0.261968	-0.00938014	0.241784	-0.0598533
1_DNTAG0949	1	YNL219C	ALG9	DNTAG0949	0.0208636	0.0237223	0.0316761	-0.0395185
1_DNTAG0950	1	YOR002W	ALG6	DNTAG0950	0.270339	0.00593409	0.25048	-0.173511
1_DNTAG0951	1	YHR082C	KSP1	DNTAG0951	-0.051432	0.205724	0.143457	0.0474664
1_DNTAG0952	1	YER027C	GAL83	DNTAG0952	0.0024639	-0.0106407	-0.0146073	-0.108873
1_DNTAG0953	1	YOL016C	CMK2	DNTAG0953	0.0147192	0.0845812	0.0896845	-0.219872
1_DNTAG0954	1	YFR014C	CMK1	DNTAG0954	0.262345	0.152177	0.40306	-0.139441
1_DNTAG0955	1	YHR135C	YCK1	DNTAG0955	0.00199369	0.0516142	0.0426658	0.0872758
1_DNTAG0956	1	YNL154C	YCK2	DNTAG0956	-0.120764	0.314229	0.181876	-0.242054
1_DNTAG0957	1	YNL307C	MCK1	DNTAG0957	-0.0673091	0.0434251	-0.0328149	-0.0768348
1_DNTAG0958	1	YBL016W	FUS3	DNTAG0958	-0.558726	0.449726	-0.159185	-0.34617
1_DNTAG0959	1	YLR113W	HOG1	DNTAG0959	-0.0120124	-0.0478826	-0.0697488	0.0185743
1_DNTAG0960	1	YPR054W	SMK1	DNTAG0960	0.0748436	-0.0122357	0.0519353	0.160236
1_DNTAG0961	1	YOR231W	MKK1	DNTAG0961	-0.000147116	0.0886964	0.0772478	0.181128
1_DNTAG0963	1	YPL140C	MKK2	DNTAG0963	-0.245133	0.215213	-0.0438474	-0.218954
1_DNTAG0964	1	YCR073C	SSK22	DNTAG0964	0.00328272	0.230254	0.221144	-0.252599
1_DNTAG0966	1	YNR031C	SSK2	DNTAG0966	-0.107005	-0.469093	-0.58074	0.0571773
1_DNTAG0967	1	YJL095W	BCK1	DNTAG0967	0.109997	-0.200171	-0.0995895	0.163682
1_DNTAG0969	1	YNL298W	CLA4	DNTAG0969	0.0454753	0.0457286	0.0811547	0.171595
1_DNTAG0970	1	YNL020C	ARK1	DNTAG0970	0.0566692	0.215102	0.250814	0.0713936
1_DNTAG0971	1	YOL113W	SKM1	DNTAG0971	-0.0581123	0.0358405	-0.0280986	0.141548
1_DNTAG0972	1	YGR262C	BUD32	DNTAG0972	0.0561104	0.289974	0.32772	-0.027507
1_DNTAG0973	1	YDR523C	SPS1	DNTAG0973	0.0155524	-0.139773	-0.131186	0.127068
1_DNTAG0975	1	YJL164C	TPK1	DNTAG0975	-0.189849	0.213024	0.00930857	-0.330514
1_DNTAG0976	1	YPL203W	TPK2	DNTAG0976	0.463112	-0.2278	0.221214	-0.160175
1_DNTAG0977	1	YKL166C	TPK3	DNTAG0977	-0.081139	-0.497949	-0.591797	0.627797
1_DNTAG0979	1	YIL015W	BAR1	DNTAG0979	-0.143622	0.0690604	-0.0817666	-0.0245188
1_DNTAG0980	1	YOR003W	YSP3	DNTAG0980	0.00957491	0.113114	0.1092	-0.220751
1_DNTAG0981	1	YHL030W	ECM29	DNTAG0981	-0.126699	0.160429	0.0242232	0.0368151
1_DNTAG0982	1	YHR184W	SSP1	DNTAG0982	0.113448	-0.105318	-0.00530588	-0.0665047
1_DNTAG0983	1	YDL239C	ADY3	DNTAG0983	-0.286849	0.144944	-0.158914	-0.0975658
1_DNTAG0984	1	YOR124C	UBP2	DNTAG0984	-0.137214	-0.0179889	-0.168746	0.00602793
1_DNTAG0985	1	YER151C	UBP3	DNTAG0985	-0.190047	0.171698	-0.0257554	-0.109864
1_DNTAG0986	1	YKL117W	SBA1	DNTAG0986	-0.0713013	0.0125836	-0.0967745	0.0233583
1_DNTAG0987	1	YPL106C	SSE1	DNTAG0987	0.00740372	-0.00740356	-0.000137244	0.400101
1_DNTAG0988	1	YMR214W	SCJ1	DNTAG0988	-0.0347382	0.0973179	0.0190196	-0.013089
1_DNTAG0989	1	YML111W	BUL2	DNTAG0989	0.0891869	0.0312847	0.110171	-0.152699
1_DNTAG0990	1	YJR036C	HUL4	DNTAG0990	-0.0856137	0.0934279	-0.0172085	0.0238332
1_DNTAG0991	1	YGL141W	HUL5	DNTAG0991	-0.10329	0.024491	-0.0856012	0.0454274
1_DNTAG0993	1	YLR389C	STE23	DNTAG0993	0.00534092	-0.121809	-0.133806	-0.0423347
1_DNTAG0994	1	YDR251W	PAM1	DNTAG0994	-0.0656016	-0.12097	-0.197569	-0.108543
1_DNTAG0995	1	YIL049W	DFG10	DNTAG0995	0.0424241	-0.325688	-0.292505	0.355809
1_DNTAG0996	1	YPL021W	ECM23	DNTAG0996	-0.0784254	-0.0816581	-0.172151	-0.0890957
1_DNTAG0997	1	YOR032C	HMS1	DNTAG0997	-0.220784	0.310176	0.0719684	-0.110802
1_DNTAG0998	1	YMR016C	SOK2	DNTAG0998	0.233038	-0.0207312	0.200379	-0.0304672
1_DNTAG0999	1	YDL024C	DIA3	DNTAG0999	0.0434922	0.116531	0.155323	-0.421281
1_DNTAG1000	1	YDL035C	GPR1	DNTAG1000	-0.0725609	-0.135373	-0.217356	-0.0397078
1_DNTAG1001	1	YMR238W	DFG5	DNTAG1001	0.13725	-0.0615463	0.0665919	-0.340703
1_DNTAG1002	1	YLR353W	BUD8	DNTAG1002	0.040251	-0.0591423	-0.0368303	-0.262511
1_DNTAG1003	1	YMR316W	DIA1	DNTAG1003	0.0305703	-0.0431401	-0.0231363	-0.0364293
1_DNTAG1004	1	YIR019C	FLO11	DNTAG1004	0.0982232	-0.0854059	-0.00713125	-0.075302
1_DNTAG1005	1	YER118C	SHO1	DNTAG1005	-0.0163162	0.0716132	0.0207892	0.106748
1_DNTAG1007	1	YJR153W	PGU1	DNTAG1007	-0.181689	0.0550618	-0.139438	-0.0385482
1_DNTAG1008	1	YCR038C	BUD5	DNTAG1008	-0.158155	0.0756736	-0.0782433	-0.231037
1_DNTAG1009	1	YER109C	FLO8	DNTAG1009	0.0063644	-0.059811	-0.0618148	0.0429467
1_DNTAG1010	1	YMR164C	MSS11	DNTAG1010	-0.109764	0.053343	-0.0716797	-0.017368
1_DNTAG1011	1	YBR083W	TEC1	DNTAG1011	0.211318	-0.249215	-0.0500421	0.0629607
1_DNTAG1013	1	YOL081W	IRA2	DNTAG1013	-0.210781	0.228147	0.012675	-0.448668
1_DNTAG1014	1	YLL016W	SDC25	DNTAG1014	-0.295759	0.0479785	-0.259782	-0.212038
1_DNTAG1015	1	YNL138W	SRV2	DNTAG1015	-0.0713193	0.0172813	-0.0692298	0.766712
1_DNTAG1016	1	YMR172W	HOT1	DNTAG1016	-0.0574827	-0.130013	-0.215532	0.0633933
1_DNTAG1018	1	YDR496C	PUF6	DNTAG1018	0.192493	0.124574	0.314851	-0.256263
1_DNTAG1019	1	YCR097W	HMRA1	DNTAG1019	-0.101884	0.107131	0.000584854	-0.0355837
1_DNTAG1020	1	YOR129C	AFI1	DNTAG1020	0.0782857	-0.207595	-0.136026	0.0521483
1_DNTAG1021	1	YPL004C	LSP1	DNTAG1021	-0.0822725	-0.0171963	-0.109927	-0.0869374
1_DNTAG1022	1	YDR162C	NBP2	DNTAG1022	0.225088	0.0719292	0.248327	-0.0320984
1_DNTAG1023	1	YBR086C	IST2	DNTAG1023	0.101521	0.0268405	0.121527	0.129791
1_DNTAG1024	1	YMR175W	SIP18	DNTAG1024	0.0355848	-0.269273	-0.238651	0.398879
1_DNTAG1025	1	YMR092C	AIP1	DNTAG1025	-0.0659817	0.118112	0.038153	-0.13413
1_DNTAG1026	1	YPL152W	RRD2	DNTAG1026	0.351995	-0.0294687	0.310647	-0.0806818
1_DNTAG1028	1	YKL026C	GPX1	DNTAG1028	-0.281035	0.00972822	-0.301317	0.32853
1_DNTAG1029	1	YBR244W	GPX2	DNTAG1029	-0.114709	0.132237	0.00686776	-0.213072
1_DNTAG1030	1	YPL196W	OXR1	DNTAG1030	-0.115384	0.148402	0.0247443	-0.247861
1_DNTAG1031	1	YCL033C	MXR2	DNTAG1031	0.107553	-0.293491	-0.202868	0.148661
1_DNTAG1032	1	YER042W	MXR1	DNTAG1032	-0.0597266	0.0501217	-0.0181863	0.134613
1_DNTAG1033	1	YIR037W	HYR1	DNTAG1033	0.175568	-0.0851064	0.0805452	0.0559955
1_DNTAG1034	1	YER174C	GRX4	DNTAG1034	0.0484469	-0.106909	-0.0719826	-0.133828
1_DNTAG1035	1	YDR098C	GRX3	DNTAG1035	-0.236017	0.2646	0.0253463	-0.259875
1_DNTAG1036	1	YCL035C	GRX1	DNTAG1036	0.240579	-0.623021	-0.520718	0.164743
1_DNTAG1037	1	YFL026W	STE2	DNTAG1037	0.141321	0.0742792	0.208532	-0.132942
1_DNTAG1038	1	YNL091W	NST1	DNTAG1038	-0.267685	0.525649	0.123667	-0.438572
1_DNTAG1039	1	YER019W	ISC1	DNTAG1039	-0.0896605	0.0574909	-0.0633925	-0.258736
1_DNTAG1040	1	YNR074C	AIF1	DNTAG1040	-0.496049	0.409552	-0.102829	-0.568871
1_DNTAG1041	1	YOR010C	TIR2	DNTAG1041	0.0467911	0.144437	0.192435	-0.0764691
1_DNTAG1042	1	YOR324C	FRT1	DNTAG1042	-0.190656	0.044961	-0.171639	0.0684482
1_DNTAG1043	1	YAL028W	FRT2	DNTAG1043	-0.0911672	0.0277473	-0.0734326	0.0220249
1_DNTAG1044	1	YGR234W	YHB1	DNTAG1044	-0.0709126	-0.301873	-0.382933	0.429125
1_DNTAG1045	1	YOL151W	GRE2	DNTAG1045	-0.250447	0.00917397	-0.252946	0.240485
1_DNTAG1046	1	YER011W	TIR1	DNTAG1046	-0.191917	0.210751	0.00994308	0.0295185
1_DNTAG1047	1	YPL240C	HSP82	DNTAG1047	0.0939717	0.0176012	0.0936309	-0.164317
1_DNTAG1048	1	YIL033C	BCY1	DNTAG1048	0.375469	0.0325993	0.373903	0.171389
1_DNTAG1049	1	YDR017C	KCS1	DNTAG1049	-0.144797	-0.0320359	-0.208581	0.270467
1_DNTAG1050	1	YNL160W	YGP1	DNTAG1050	0.0503757	-0.00817546	0.0414786	0.0703917
1_DNTAG1051	1	YPL223C	GRE1	DNTAG1051	-0.0791041	0.242867	0.150397	-0.206514
1_DNTAG1052	1	YDR184C	ATC1	DNTAG1052	0.067484	0.104004	0.137343	-0.102818
1_DNTAG1053	1	YBR082C	UBC4	DNTAG1053	0.162415	0.107922	0.253268	0.187053
1_DNTAG1054	1	YDR171W	HSP42	DNTAG1054	0.187775	-0.141204	0.0269061	-0.0638322
1_DNTAG1055	1	YHL048W	COS8	DNTAG1055	0.0512571	0.148342	0.182068	-0.133876
1_DNTAG1057	1	YPR040W	TIP41	DNTAG1057	0.186276	0.0443706	0.211329	-0.133594
1_DNTAG1058	1	YIL047C	SYG1	DNTAG1058	0.0503885	0.136957	0.177161	-0.690628
1_DNTAG1059	1	YBR077C	SLM4	DNTAG1059	-0.0876581	0.231429	0.158888	0.570047
1_DNTAG1060	1	YGL121C	GPG1	DNTAG1060	-0.0107635	-0.148305	-0.168439	0.0251195
1_DNTAG1061	1	YOR371C	GPB1	DNTAG1061	-0.237833	0.159154	-0.105172	-0.23867
1_DNTAG1066	1	YNL145W	MFA2	DNTAG1066	0.225236	-0.102082	0.0154182	0.0105606
1_DNTAG1069	1	YNL173C	MDG1	DNTAG1069	-0.0106282	0.124699	0.104277	-0.033559
1_DNTAG1072	1	YDR085C	AFR1	DNTAG1072	-0.0903548	0.264778	0.141663	0.0371632
1_DNTAG1074	1	YDR284C	DPP1	DNTAG1074	0.14255	-0.142669	-0.0150429	-0.0420156
1_DNTAG1075	1	YFL047W	RGD2	DNTAG1075	-0.0266127	0.0262963	-0.015682	0.0787083
1_DNTAG1076	1	YOR134W	BAG7	DNTAG1076	-0.00841441	-0.0294254	-0.0476973	-0.0949165
1_DNTAG1077	1	YDL240W	LRG1	DNTAG1077	0.353295	0.0132736	0.364143	-0.187772
1_DNTAG1078	1	YDR389W	SAC7	DNTAG1078	-0.0913754	0.305359	0.170563	-0.367135
1_DNTAG1079	1	YDR403W	DIT1	DNTAG1079	-0.0946548	-0.173173	-0.274243	-0.0528923
1_DNTAG1080	1	YDR402C	DIT2	DNTAG1080	-0.96606	0.436178	-0.54133	0.685686
1_DNTAG1081	1	YLR307W	CDA1	DNTAG1081	-0.229404	0.196776	-0.043544	-0.0437324
1_DNTAG1082	1	YLR308W	CDA2	DNTAG1082	0.278587	-0.106246	0.163855	0.0253279
1_DNTAG1083	1	YNL128W	TEP1	DNTAG1083	-0.0495692	0.120019	0.0599497	-0.00464634
1_DNTAG1084	1	YHR185C	PFS1	DNTAG1084	0.10621	-0.102479	-0.0236654	0.170479
1_DNTAG1085	1	YDR104C	SPO71	DNTAG1085	-0.127721	0.0737767	-0.0621514	0.0954969
1_DNTAG1086	1	YHR139C	SPS100	DNTAG1086	-0.0793194	0.0735835	-0.0101869	0.244421
1_DNTAG1087	1	YOR242C	SSP2	DNTAG1087	-0.260813	-0.47178	-0.737234	0.0494145
1_DNTAG1088	1	YBR045C	GIP1	DNTAG1088	-0.0716242	0.0134473	-0.128745	0.129733
1_DNTAG1089	1	YOR298W	MUM3	DNTAG1089	0.0525259	-0.049219	-0.0194901	0.0909366
1_DNTAG1090	1	YDR260C	SWM1	DNTAG1090	-0.0338439	-0.0138215	-0.0756711	0.170041
1_DNTAG1091	1	YNL204C	SPS18	DNTAG1091	-0.2106	0.190563	-0.0442931	-0.0448999
1_DNTAG1092	1	YER132C	PMD1	DNTAG1092	-0.118979	0.0724944	-0.0584627	-0.243449
1_DNTAG1093	1	YOR190W	SPR1	DNTAG1093	-0.177277	-0.000926323	-0.189648	0.0744144
1_DNTAG1094	1	YMR063W	RIM9	DNTAG1094	0.270145	-0.107108	0.1547	-0.0144668
1_DNTAG1095	1	YHR153C	SPO16	DNTAG1095	-0.0629014	-0.070908	-0.142589	0.177913
1_DNTAG1097	1	YIL099W	SGA1	DNTAG1097	-0.0539452	-0.0187817	-0.0935849	-0.0219615
1_DNTAG1099	1	YNL098C	RAS2	DNTAG1099	0.201773	-0.0296344	0.159464	-0.188471
1_DNTAG1100	1	YGR225W	AMA1	DNTAG1100	0.14378	0.0473979	0.182298	0.0110985
1_DNTAG1101	1	YDR522C	SPS2	DNTAG1101	-0.132015	0.0118411	-0.129839	0.100879
1_DNTAG1102	1	YNL294C	RIM21	DNTAG1102	0.140229	0.0965093	0.225865	0.18035
1_DNTAG1103	1	YOR313C	SPS4	DNTAG1103	-0.144053	0.119854	-0.0423196	-0.0695863
1_DNTAG1104	1	YBL058W	SHP1	DNTAG1104	-0.215092	0.376586	0.154117	-0.157314
1_DNTAG1105	1	YAL009W	SPO7	DNTAG1105	-0.057645	0.0651305	-0.0132867	0.121037
1_DNTAG1106	1	YLR341W	SPO77	DNTAG1106	0.214424	0.130169	0.288697	-0.0286921
1_DNTAG1107	1	YHR004C	NEM1	DNTAG1107	-0.131948	0.461433	0.325291	0.0569318
1_DNTAG1108	1	YER177W	BMH1	DNTAG1108	-0.205134	0.155221	-0.0682654	-0.352437
1_DNTAG1109	1	YDR099W	BMH2	DNTAG1109	-0.00983371	0.188558	0.168912	-0.321273
1_DNTAG1110	1	YIR026C	YVH1	DNTAG1110	-0.11516	0.196446	0.0602047	0.0838034
1_DNTAG1111	1	YGL181W	GTS1	DNTAG1111	-0.036275	0.216835	0.165938	-0.18551
1_DNTAGbre1KO	1	BRE1_Plate1	BRE1	DNTAGbre1KO	-2.11806	0.0941717	-2.05717	-0.22022
1_DNTAGdot1KO	1	DOT1_Plate1	DOT1	DNTAGdot1KO	0.0983012	-2.02356	-1.93491	0.000745613
1_DNTAGDot1OE	1	DOT1OE_Plate1	DOT1OE	DNTAGDot1OE	2.38111	-0.98423	1.38169	0.450694
2_DNTAG0001	2	YOL043C	NTG2	DNTAG0001	0.207366	-0.0339061	0.088082	0.227767
2_DNTAG0003	2	YJL218W	YJL218W	DNTAG0003	-0.233307	0.0407805	-0.204282	0.275191
2_DNTAG0004	2	YEL052W	AFG1	DNTAG0004	-0.0616662	-0.032034	-0.0995449	-0.227785
2_DNTAG0005	2	YPL074W	YTA6	DNTAG0005	0.201648	-0.0789574	0.113856	-0.00955187
2_DNTAG0006	2	YDR061W	YDR061W	DNTAG0006	0.172094	0.0919995	0.25523	0.112652
2_DNTAG0008	2	YJL084C	ALY2	DNTAG0008	-0.158638	0.12332	-0.0518173	0.0212145
2_DNTAG0009	2	YGR163W	GTR2	DNTAG0009	0.150479	-0.488127	-0.345507	0.911916
2_DNTAG0010	2	YLR289W	GUF1	DNTAG0010	-0.0244263	0.0799506	0.0480895	-0.187333
2_DNTAG0011	2	YDR291W	HRQ1	DNTAG0011	-0.0355608	0.0342622	-0.00880216	-0.126348
2_DNTAG0012	2	YFR038W	IRC5	DNTAG0012	0.0136653	-0.094211	-0.0936453	0.159195
2_DNTAG0013	2	YLR419W	YLR419W	DNTAG0013	-0.13851	-0.00303808	-0.15014	-0.0603175
2_DNTAG0014	2	YLR118C	YLR118C	DNTAG0014	-0.134659	0.187269	0.0545106	-0.0538513
2_DNTAG0015	2	YJR107W	YJR107W	DNTAG0015	0.134239	0.25055	0.376243	-0.23847
2_DNTAG0016	2	YFL061W	DDI2	DNTAG0016	-0.148602	0.168363	0.0148991	-0.0899091
2_DNTAG0017	2	YPL189W	GUP2	DNTAG0017	0.0430942	0.0476684	0.0742673	-0.0143187
2_DNTAG0018	2	YJR138W	IML1	DNTAG0018	0.159758	0.0879376	0.230359	-0.134817
2_DNTAG0019	2	YPL024W	RMI1	DNTAG0019	0.213055	0.00864514	0.213396	0.197494
2_DNTAG0020	2	YDR383C	NKP1	DNTAG0020	-0.0277382	-0.0261451	-0.0632875	-0.045156
2_DNTAG0021	2	YLR315W	NKP2	DNTAG0021	0.0709413	-0.142425	-0.0784166	0.0726344
2_DNTAG0022	2	YBR233W	PBP2	DNTAG0022	-0.18683	0.143423	-0.052726	0.193417
2_DNTAG0023	2	YFR023W	PES4	DNTAG0023	-0.0557427	0.0777988	0.0142322	0.0422361
2_DNTAG0024	2	YOR104W	PIN2	DNTAG0024	-0.123366	0.0452281	-0.0858341	0.0385148
2_DNTAG0025	2	YDR505C	PSP1	DNTAG0025	0.00284662	0.0103056	0.0046192	0.119688
2_DNTAG0027	2	YDL001W	RMD1	DNTAG0027	-0.0195394	-0.045295	-0.0801735	0.196501
2_DNTAG0028	2	YHL023C	NPR3	DNTAG0028	0.330159	0.036929	0.356029	0.126225
2_DNTAG0029	2	YEL072W	RMD6	DNTAG0029	-0.120418	-0.0498102	-0.178482	0.150438
2_DNTAG0030	2	YFR048W	RMD8	DNTAG0030	0.149611	-0.128655	0.0062052	0.31981
2_DNTAG0031	2	YMR266W	RSN1	DNTAG0031	0.0168861	0.0332936	-0.127921	-0.270251
2_DNTAG0032	2	YGL056C	SDS23	DNTAG0032	-0.267173	0.0809121	-0.194626	0.181894
2_DNTAG0033	2	YBL031W	SHE1	DNTAG0033	-0.373898	0.164698	-0.218939	0.184748
2_DNTAG0034	2	YGL228W	SHE10	DNTAG0034	-0.119231	0.0568516	-0.0738906	0.135191
2_DNTAG0035	2	YLR187W	SKG3	DNTAG0035	-0.052338	-0.0445708	-0.129608	0.0365205
2_DNTAG0036	2	YIL011W	TIR3	DNTAG0036	0.179632	-0.0542141	0.119773	-0.140944
2_DNTAG0037	2	YEL038W	UTR4	DNTAG0037	-0.112485	0.13959	0.0228264	-0.13572
2_DNTAG0038	2	YNL212W	VID27	DNTAG0038	0.0950506	-0.0691479	0.0194393	0.200296
2_DNTAG0039	2	YPL239W	YAR1	DNTAG0039	0.816357	-0.561638	0.260121	-0.60663
2_DNTAG0041	2	YBR094W	PBY1	DNTAG0041	0.039552	-0.0525343	-0.0211444	-0.0878853
2_DNTAG0042	2	YBR108W	AIM3	DNTAG0042	-0.163221	-0.144454	-0.319509	0.0276133
2_DNTAG0044	2	YBR255W	MTC4	DNTAG0044	-0.0526805	0.00288321	-0.0681632	0.0850969
2_DNTAG0045	2	YBR284W	YBR284W	DNTAG0045	-0.196565	0.276413	0.0652469	-0.344086
2_DNTAG0046	2	YDL114W	YDL114W	DNTAG0046	-0.0343794	-0.0230788	-0.0659095	-0.0715516
2_DNTAG0047	2	YDR249C	YDR249C	DNTAG0047	0.0427546	0.0538703	0.0899058	0.0030548
2_DNTAG0049	2	YEL041W	YEF1	DNTAG0049	-0.0484117	0.0666584	0.0112076	0.00366594
2_DNTAG0050	2	YER066W	RRT13	DNTAG0050	-0.19838	0.11942	-0.0887437	0.108428
2_DNTAG0051	2	YGL242C	YGL242C	DNTAG0051	-0.10664	0.205339	0.0898701	-0.0963437
2_DNTAG0052	2	YGR126W	YGR126W	DNTAG0052	-0.0104053	0.0732529	0.00918921	-0.0399062
2_DNTAG0053	2	YIR024C	INA22	DNTAG0053	-0.0417521	0.116103	0.0673014	-0.00854441
2_DNTAG0054	2	YJL149W	DAS1	DNTAG0054	1.01953	-1.3817	-0.356762	-0.338383
2_DNTAG0055	2	YJR142W	YJR142W	DNTAG0055	0.0241045	0.0962241	0.114441	-0.0256502
2_DNTAG0056	2	YKL056C	TMA19	DNTAG0056	0.0250117	0.183069	0.180602	0.0265341
2_DNTAG0057	2	YKL151C	YKL151C	DNTAG0057	-0.00618126	0.117386	0.102458	0.0570155
2_DNTAG0058	2	YLL007C	LMO1	DNTAG0058	0.0603742	-0.173523	-0.119332	0.269264
2_DNTAG0059	2	YLL049W	LDB18	DNTAG0059	0.171078	-0.0680448	0.0768973	0.229963
2_DNTAG0060	2	YLR179C	YLR179C	DNTAG0060	0.0672185	0.0885585	0.149437	-0.190045
2_DNTAG0061	2	YLR218C	COA4	DNTAG0061	0.385073	0.1149	0.188537	-0.612316
2_DNTAG0062	2	YLR254C	NDL1	DNTAG0062	0.0649531	0.0570402	0.114779	0.0354834
2_DNTAG0063	2	YLR352W	YLR352W	DNTAG0063	-0.123079	0.0594754	-0.0775215	-0.1091
2_DNTAG0064	2	YMR262W	YMR262W	DNTAG0064	-0.0801731	0.020172	-0.0824037	-0.0586652
2_DNTAG0065	2	YOL111C	MDY2	DNTAG0065	0.271046	-0.0911096	0.172092	-0.0405141
2_DNTAG0066	2	YOL161C	PAU20	DNTAG0066	-0.0173107	0.110568	0.0849197	0.054079
2_DNTAG0067	2	YOR296W	YOR296W	DNTAG0067	0.0765529	0.0399307	0.104731	-0.0179639
2_DNTAG0068	2	YOR322C	LDB19	DNTAG0068	-0.264406	0.13722	-0.130694	-0.237621
2_DNTAG0069	2	YOR378W	AMF1	DNTAG0069	0.106683	0.207099	0.306129	-0.299171
2_DNTAG0070	2	YPL066W	RGL1	DNTAG0070	-0.293837	0.174283	-0.132961	0.245251
2_DNTAG0071	2	YPL144W	POC4	DNTAG0071	-0.010617	0.10308	0.065727	0.144349
2_DNTAG0073	2	YDR130C	FIN1	DNTAG0073	0.0837909	0.29813	0.373699	-0.378447
2_DNTAG0075	2	YPR106W	ISR1	DNTAG0075	-0.0225792	0.150107	0.125187	-0.376194
2_DNTAG0076	2	YOR233W	KIN4	DNTAG0076	-0.095759	0.0276279	-0.0814411	-0.0638617
2_DNTAG0077	2	YBR125C	PTC4	DNTAG0077	0.063723	-0.0671435	-0.0113864	0.0627372
2_DNTAG0078	2	YGR203W	YCH1	DNTAG0078	0.0968218	0.0766991	0.159995	-0.0625911
2_DNTAG0080	2	YJR129C	EFM3	DNTAG0080	0.113365	0.0153234	0.114509	-0.270717
2_DNTAG0081	2	YPL017C	IRC15	DNTAG0081	-0.0304555	0.233423	0.193231	-0.00461242
2_DNTAG0082	2	YDR501W	PLM2	DNTAG0082	-0.191685	0.348501	0.126567	-0.503853
2_DNTAG0083	2	YLR183C	TOS4	DNTAG0083	0.62643	-0.0849361	0.532223	-0.192737
2_DNTAG0084	2	YGL096W	TOS8	DNTAG0084	0.212526	-0.0693574	0.135041	0.105124
2_DNTAG0085	2	YNR048W	YNR048W	DNTAG0085	-0.219038	0.00455491	-0.22443	0.0354102
2_DNTAG0086	2	YJL197W	UBP12	DNTAG0086	-0.0783083	-0.125381	-0.217959	-0.00318351
2_DNTAG0087	2	YBL067C	UBP13	DNTAG0087	-0.238105	0.00725542	-0.246047	0.238399
2_DNTAG0088	2	YAL020C	ATS1	DNTAG0088	-0.261575	0.366607	0.0946552	-0.00244591
2_DNTAG0089	2	YKR048C	NAP1	DNTAG0089	-0.121615	0.243744	0.0772726	-0.174403
2_DNTAG0090	2	YKL110C	KTI12	DNTAG0090	-0.161775	0.0949475	-0.0782907	0.164473
2_DNTAG0092	2	YNL289W	PCL1	DNTAG0092	-0.111043	0.0778096	-0.0552734	-0.33738
2_DNTAG0093	2	YDL127W	PCL2	DNTAG0093	-0.0684608	0.0653675	-0.0345908	-0.0145701
2_DNTAG0094	2	YHR071W	PCL5	DNTAG0094	0.153356	0.060444	0.200392	-0.37751
2_DNTAG0095	2	YDL179W	PCL9	DNTAG0095	-0.198175	-0.0622786	-0.265047	0.085032
2_DNTAG0097	2	YMR052W	FAR3	DNTAG0097	0.29099	-0.00164897	0.286672	-0.186986
2_DNTAG0098	2	YPR075C	OPY2	DNTAG0098	0.0713643	-0.0993012	-0.0390033	-0.0234409
2_DNTAG0099	2	YKL160W	ELF1	DNTAG0099	-0.303601	0.165985	-0.145018	-0.071734
2_DNTAG0100	2	YPL089C	RLM1	DNTAG0100	-0.0543702	-0.0491204	-0.110019	-0.0126639
2_DNTAG0102	2	YKL129C	MYO3	DNTAG0102	0.0370326	0.0118946	0.0498604	0.162123
2_DNTAG0103	2	YMR109W	MYO5	DNTAG0103	0.825756	-1.14313	-0.311975	-0.147262
2_DNTAG0104	2	YPR030W	CSR2	DNTAG0104	-0.0656567	-0.0349229	-0.108565	0.0295681
2_DNTAG0105	2	YMR234W	RNH1	DNTAG0105	-0.0999767	-0.0144466	-0.123306	0.125537
2_DNTAG0106	2	YJL042W	MHP1	DNTAG0106	-0.142955	0.00840205	-0.148734	-0.0270521
2_DNTAG0107	2	YOR191W	ULS1	DNTAG0107	-0.161697	0.208185	0.0428822	0.119996
2_DNTAG0108	2	YMR284W	YKU70	DNTAG0108	-0.073541	-0.104873	-0.182799	-0.0277855
2_DNTAG0109	2	YMR106C	YKU80	DNTAG0109	-0.0529555	-0.188674	-0.250132	0.173978
2_DNTAG0111	2	YNL097C	PHO23	DNTAG0111	0.547519	-0.00597619	0.529893	-0.00952841
2_DNTAG0112	2	YBR245C	ISW1	DNTAG0112	-0.149391	0.065083	-0.0914909	0.0867308
2_DNTAG0113	2	YGR056W	RSC1	DNTAG0113	-0.238476	0.147646	-0.0995506	0.120887
2_DNTAG0114	2	YFR013W	IOC3	DNTAG0114	0.116461	-0.212904	-0.147844	0.155086
2_DNTAG0116	2	YGL163C	RAD54	DNTAG0116	0.665089	-0.0543196	0.607685	-0.110206
2_DNTAG0118	2	YOL017W	ESC8	DNTAG0118	-0.176599	0.257057	0.0513694	-0.305114
2_DNTAG0119	2	YDR181C	SAS4	DNTAG0119	-0.469914	0.107575	-0.376673	-0.439849
2_DNTAG0120	2	YOR213C	SAS5	DNTAG0120	-0.698568	0.28479	-0.422344	-0.381191
2_DNTAG0121	2	YJL065C	DLS1	DNTAG0121	-0.384835	0.0277567	-0.368902	0.117703
2_DNTAG0122	2	YMR219W	ESC1	DNTAG0122	0.0330325	-0.0989518	-0.0809024	-0.30797
2_DNTAG0123	2	YLR015W	BRE2	DNTAG0123	0.181782	-0.274411	-0.0937249	-0.0141282
2_DNTAG0124	2	YDR469W	SDC1	DNTAG0124	0.0995361	0.0104228	0.111448	-0.206391
2_DNTAG0125	2	YBR175W	SWD3	DNTAG0125	0.423518	-0.173859	0.24987	-0.00822221
2_DNTAG0126	2	YLR288C	MEC3	DNTAG0126	0.107144	-0.0528749	0.0459158	-0.01547
2_DNTAG0127	2	YBR278W	DPB3	DNTAG0127	0.132723	-0.0909567	0.0330422	-0.271224
2_DNTAG0128	2	YDR121W	DPB4	DNTAG0128	-0.209322	0.0457389	-0.186509	0.124891
2_DNTAG0129	2	YPL001W	HAT1	DNTAG0129	0.152039	-0.0671918	0.0673641	0.0480526
2_DNTAG0131	2	YHR119W	SET1	DNTAG0131	0.18115	-0.284253	-0.123009	0.352588
2_DNTAG0132	2	YCL061C	MRC1	DNTAG0132	0.383032	-0.0354898	0.338887	-0.121001
2_DNTAG0133	2	YGL037C	PNC1	DNTAG0133	-0.0075476	-0.0562404	-0.0776391	-0.00236555
2_DNTAG0134	2	YOR209C	NPT1	DNTAG0134	0.169885	-0.0545032	0.106651	-0.0849395
2_DNTAG0135	2	YDR440W	DOT1	DNTAG0135	0.266747	-2.24353	-1.99563	0.105187
2_DNTAG0136	2	YPL138C	SPP1	DNTAG0136	-0.0249274	0.0505065	0.0103663	-0.169453
2_DNTAG0137	2	YAL019W	FUN30	DNTAG0137	0.106657	-0.277083	-0.216303	0.285903
2_DNTAG0138	2	YDR254W	CHL4	DNTAG0138	-0.0971636	-0.077798	-0.179231	0.395149
2_DNTAG0140	2	YBR107C	IML3	DNTAG0140	-0.056003	0.0299141	-0.0331055	-0.0241649
2_DNTAG0141	2	YGR089W	NNF2	DNTAG0141	-0.236142	-0.000816343	-0.262725	0.338232
2_DNTAG0142	2	YLR381W	CTF3	DNTAG0142	-0.0688737	0.0543255	-0.0232648	-0.0147663
2_DNTAG0143	2	YPR046W	MCM16	DNTAG0143	0.11367	-0.0346987	0.0717936	-0.0340006
2_DNTAG0144	2	YDR318W	MCM21	DNTAG0144	-0.145685	0.226866	0.0729948	0.222527
2_DNTAG0146	2	YAR018C	KIN3	DNTAG0146	-0.203979	-0.0218025	-0.259003	0.0107474
2_DNTAG0147	2	YPL008W	CHL1	DNTAG0147	0.595107	-0.230093	0.318995	0.0762128
2_DNTAG0148	2	YCR077C	PAT1	DNTAG0148	0.335223	-0.293377	0.037343	0.143699
2_DNTAG0149	2	YPL018W	CTF19	DNTAG0149	0.196115	-0.13063	0.0438715	0.0174937
2_DNTAG0151	2	YJR053W	BFA1	DNTAG0151	-0.00497176	0.0255216	0.011748	0.0676818
2_DNTAG0152	2	YDR435C	PPM1	DNTAG0152	0.0471973	-0.0343641	0.0102297	-0.186374
2_DNTAG0153	2	YNL327W	EGT2	DNTAG0153	0.0347102	0.0539371	0.0806857	-0.0887437
2_DNTAG0156	2	YBR023C	CHS3	DNTAG0156	-0.0492754	-0.0107862	-0.06964	0.0780417
2_DNTAG0157	2	YBL061C	SKT5	DNTAG0157	0.0619794	-0.00139576	0.0516862	0.0423435
2_DNTAG0158	2	YNL166C	BNI5	DNTAG0158	-0.0816038	0.0409961	-0.0468436	0.0732756
2_DNTAG0161	2	YNR067C	DSE4	DNTAG0161	0.217309	-0.273556	-0.0772435	0.120166
2_DNTAG0165	2	YJL115W	ASF1	DNTAG0165	0.986744	-0.409258	0.459865	0.453196
2_DNTAG0166	2	YER142C	MAG1	DNTAG0166	-0.0285879	0.053565	0.0170251	0.0167442
2_DNTAG0167	2	YLR427W	MAG2	DNTAG0167	0.124377	-0.120613	-0.00432872	0.02663
2_DNTAG0168	2	YDL200C	MGT1	DNTAG0168	-0.0115961	0.0340414	-0.00383774	-0.213307
2_DNTAG0169	2	YGR081C	SLX9	DNTAG0169	-0.136284	0.316903	-0.0214549	0.0202633
2_DNTAG0170	2	YER116C	SLX8	DNTAG0170	1.49696	-0.104897	1.39138	0.151713
2_DNTAG0172	2	YOL090W	MSH2	DNTAG0172	-0.127648	-0.0526664	-0.196997	-0.185269
2_DNTAG0173	2	YCR092C	MSH3	DNTAG0173	0.205776	-0.154262	0.0354142	-0.288684
2_DNTAG0174	2	YML061C	PIF1	DNTAG0174	-0.0276247	-0.096218	-0.124305	0.159922
2_DNTAG0175	2	YJL208C	NUC1	DNTAG0175	0.0441633	0.125465	0.162503	-0.366471
2_DNTAG0176	2	YDR110W	FOB1	DNTAG0176	0.0613891	0.150267	0.204298	-0.0189348
2_DNTAG0177	2	YHR120W	MSH1	DNTAG0177	0.0336243	-0.10152	-0.0739426	-0.163054
2_DNTAG0178	2	YLR032W	RAD5	DNTAG0178	0.170801	0.0393096	0.200744	-0.0357136
2_DNTAG0179	2	YMR173W	DDR48	DNTAG0179	-0.14018	-0.0187672	-0.210791	-0.139254
2_DNTAG0180	2	YJR069C	HAM1	DNTAG0180	0.0428902	-0.0478679	-0.0132176	0.0108278
2_DNTAG0182	2	YDR030C	RAD28	DNTAG0182	0.0583902	-0.0339238	0.00653213	-0.0807575
2_DNTAG0183	2	YDR263C	DIN7	DNTAG0183	-0.00144378	-0.00165665	-0.0106388	-0.044507
2_DNTAG0184	2	YBL019W	APN2	DNTAG0184	-0.0306548	-0.0188563	-0.0512523	0.0135944
2_DNTAG0185	2	YMR156C	TPP1	DNTAG0185	-0.0334011	0.184305	0.143887	-0.163424
2_DNTAG0186	2	YIR002C	MPH1	DNTAG0186	0.199463	0.0778509	0.266949	-0.143231
2_DNTAG0187	2	YBR223C	TDP1	DNTAG0187	0.0941485	0.0558686	0.12936	-0.198559
2_DNTAG0191	2	YBR228W	SLX1	DNTAG0191	-0.0177743	-0.0560103	-0.082173	0.121095
2_DNTAG0192	2	YMR137C	PSO2	DNTAG0192	-0.191021	0.166262	-0.0308572	-0.0520439
2_DNTAG0193	2	YPR135W	CTF4	DNTAG0193	0.802169	-0.328922	0.466975	-0.0345784
2_DNTAG0194	2	YJR144W	MGM101	DNTAG0194	0.163768	-0.307676	-0.152614	0.431658
2_DNTAG0195	2	YJL092W	SRS2	DNTAG0195	0.323689	-0.0965641	0.213073	-0.0113632
2_DNTAG0196	2	YKL114C	APN1	DNTAG0196	-0.0285312	-0.0528477	-0.0929486	0.0312381
2_DNTAG0197	2	YAL015C	NTG1	DNTAG0197	-0.159639	0.0350243	-0.132106	-0.0887857
2_DNTAG0198	2	YOR346W	REV1	DNTAG0198	-0.0995739	0.0240502	-0.0930193	0.0137157
2_DNTAG0199	2	YDR386W	MUS81	DNTAG0199	-0.091929	0.189225	0.0865438	-0.042669
2_DNTAG0200	2	YDR419W	RAD30	DNTAG0200	-0.0786386	0.01877	-0.0691445	0.0704016
2_DNTAG0201	2	YHR081W	LRP1	DNTAG0201	0.0971185	0.110394	0.203369	-0.0344213
2_DNTAG0202	2	YPR164W	MMS1	DNTAG0202	0.541281	-0.0691987	0.464634	0.00824963
2_DNTAG0203	2	YLR265C	NEJ1	DNTAG0203	-0.0998975	0.0798242	-0.0407586	0.0170783
2_DNTAG0205	2	YGL127C	SOH1	DNTAG0205	0.815697	-0.165109	0.631356	0.568519
2_DNTAG0206	2	YDR079C-A	TFB5	DNTAG0206	-0.431407	0.0268941	-0.413262	0.430551
2_DNTAG0207	2	YKL025C	PAN3	DNTAG0207	-0.0067685	0.246404	0.22342	-0.259489
2_DNTAG0209	2	YMR224C	MRE11	DNTAG0209	0.525592	-0.126742	0.384108	0.161873
2_DNTAG0210	2	YIL153W	RRD1	DNTAG0210	0.360188	-0.076898	0.265548	0.110343
2_DNTAG0211	2	YML060W	OGG1	DNTAG0211	-0.17248	0.0771169	-0.1015	-0.025069
2_DNTAG0212	2	YER169W	RPH1	DNTAG0212	0.274016	0.0938276	0.350499	-0.0803487
2_DNTAG0214	2	YBR098W	MMS4	DNTAG0214	0.081425	0.0237163	0.0881055	0.0313236
2_DNTAG0215	2	YML102W	CAC2	DNTAG0215	0.28068	-0.0632504	0.209078	-0.0156274
2_DNTAG0216	2	YBR195C	MSI1	DNTAG0216	0.277917	-0.0695527	0.203301	-0.00232171
2_DNTAG0217	2	YPL167C	REV3	DNTAG0217	-0.15086	0.13172	-0.0432314	-0.0363884
2_DNTAG0218	2	YIL139C	REV7	DNTAG0218	0.0695536	0.018174	0.0322253	-0.613689
2_DNTAG0219	2	YHR031C	RRM3	DNTAG0219	0.440056	-0.145141	0.295106	-0.136588
2_DNTAG0220	2	YGL168W	HUR1	DNTAG0220	0.588367	-0.0428002	0.542778	-0.0870935
2_DNTAG0222	2	YDR279W	RNH202	DNTAG0222	-0.104245	-0.0255371	-0.146422	0.0717815
2_DNTAG0223	2	YLR154C	RNH203	DNTAG0223	0.0357593	0.0399508	0.0563146	-0.119275
2_DNTAG0224	2	YER070W	RNR1	DNTAG0224	1.19879	-0.585863	0.540977	0.245103
2_DNTAG0225	2	YIL066C	RNR3	DNTAG0225	-0.110562	0.0316813	-0.0871204	0.119586
2_DNTAG0226	2	YGR180C	RNR4	DNTAG0226	0.119267	-0.00689929	0.0651185	-0.295747
2_DNTAG0227	2	YNL273W	TOF1	DNTAG0227	0.143199	-0.0568189	0.0737625	-0.0282334
2_DNTAG0228	2	YGR276C	RNH70	DNTAG0228	0.15823	-0.045593	0.104072	-0.215932
2_DNTAG0229	2	YLR135W	SLX4	DNTAG0229	0.0954349	-0.190219	-0.108206	0.0352778
2_DNTAG0230	2	YNL218W	MGS1	DNTAG0230	-0.159504	-0.00945029	-0.186259	-0.0278006
2_DNTAG0231	2	YCR086W	CSM1	DNTAG0231	0.570745	-0.107079	0.0709978	-0.316705
2_DNTAG0232	2	YOR144C	ELG1	DNTAG0232	-0.0358721	-0.15937	-0.193841	0.358987
2_DNTAG0233	2	YKR010C	TOF2	DNTAG0233	0.0514082	-0.0492198	-0.00279145	-0.0162439
2_DNTAG0236	2	YLR320W	MMS22	DNTAG0236	1.15006	-0.160411	0.99565	-0.0632128
2_DNTAG0237	2	YOR005C	DNL4	DNTAG0237	-0.00279762	-0.0203203	-0.03068	-0.0180768
2_DNTAG0239	2	YGL090W	LIF1	DNTAG0239	-0.102518	-0.0216954	-0.132647	0.0209471
2_DNTAG0240	2	YCR014C	POL4	DNTAG0240	-0.17149	0.118956	-0.0603422	-0.0177631
2_DNTAG0243	2	YNL250W	RAD50	DNTAG0243	0.536894	-0.111356	0.373054	0.196327
2_DNTAG0244	2	YDR369C	XRS2	DNTAG0244	0.210288	-0.0527117	0.15773	0.0881246
2_DNTAG0245	2	YBR214W	SDS24	DNTAG0245	0.0739545	-0.157294	-0.0924228	0.0243222
2_DNTAG0246	2	YIL135C	VHS2	DNTAG0246	0.26145	-0.180129	0.0731227	-0.0128516
2_DNTAG0247	2	YFR040W	SAP155	DNTAG0247	0.465712	-0.348549	0.107274	0.269966
2_DNTAG0248	2	YJL098W	SAP185	DNTAG0248	-0.11261	-0.021913	-0.152505	0.0665691
2_DNTAG0249	2	YKR028W	SAP190	DNTAG0249	0.0910113	-0.0803585	-0.00953077	0.136597
2_DNTAG0250	2	YGL229C	SAP4	DNTAG0250	-0.158237	0.0195182	-0.154449	-0.0278113
2_DNTAG0252	2	YPR120C	CLB5	DNTAG0252	0.249396	-0.000458523	0.216464	-0.212252
2_DNTAG0253	2	YGR109C	CLB6	DNTAG0253	-0.232303	0.0962313	-0.163014	-0.0608618
2_DNTAG0254	2	YAL040C	CLN3	DNTAG0254	-0.159458	0.155494	-0.0110084	-0.237416
2_DNTAG0255	2	YER167W	BCK2	DNTAG0255	0.148816	-0.0234446	0.0834748	-0.341627
2_DNTAG0256	2	YKR072C	SIS2	DNTAG0256	0.223518	-0.0434705	0.17263	0.031619
2_DNTAG0257	2	YOR054C	VHS3	DNTAG0257	-0.116999	-0.053877	-0.204569	-0.0295363
2_DNTAG0258	2	YLR079W	SIC1	DNTAG0258	1.18168	-0.440118	0.744374	0.243098
2_DNTAG0259	2	YJR059W	PTK2	DNTAG0259	-0.110855	0.073302	-0.0659331	-0.143169
2_DNTAG0260	2	YCR008W	SAT4	DNTAG0260	-0.00415877	-0.393536	-0.405598	0.620739
2_DNTAG0261	2	YER089C	PTC2	DNTAG0261	0.0345798	0.0138443	0.0328926	-0.195805
2_DNTAG0262	2	YER111C	SWI4	DNTAG0262	0.426917	-0.0848306	0.298565	-0.149527
2_DNTAG0265	2	YBR215W	HPC2	DNTAG0265	-0.175301	-0.0321709	-0.218203	0.172382
2_DNTAG0266	2	YLR131C	ACE2	DNTAG0266	0.153403	-0.187822	-0.0446718	0.0673574
2_DNTAG0267	2	YDR146C	SWI5	DNTAG0267	0.175566	-0.153799	0.00118136	0.21724
2_DNTAG0268	2	YGR108W	CLB1	DNTAG0268	0.0926576	0.0234696	0.0905073	0.00937088
2_DNTAG0269	2	YPR119W	CLB2	DNTAG0269	0.0459177	0.152208	0.187173	-0.102329
2_DNTAG0270	2	YDL155W	CLB3	DNTAG0270	-0.0910066	0.0609051	-0.0594428	-0.199673
2_DNTAG0271	2	YLR210W	CLB4	DNTAG0271	0.20375	-0.00330849	0.191481	0.0712005
2_DNTAG0272	2	YBL051C	PIN4	DNTAG0272	0.245333	-0.326268	-0.0940322	0.652693
2_DNTAG0273	2	YJL187C	SWE1	DNTAG0273	0.0607362	-0.106329	-0.0644344	0.143512
2_DNTAG0274	2	YMR036C	MIH1	DNTAG0274	0.102455	-0.0926086	0.00577416	-0.137871
2_DNTAG0276	2	YPR193C	HPA2	DNTAG0276	-0.129992	0.122909	-0.0241229	-0.321289
2_DNTAG0277	2	YEL066W	HPA3	DNTAG0277	-0.0229834	0.134369	0.102297	-0.205776
2_DNTAG0278	2	YGR252W	GCN5	DNTAG0278	0.05465	0.112907	0.158266	0.166861
2_DNTAG0279	2	YOR064C	YNG1	DNTAG0279	0.00416201	-0.0505189	-0.056789	-0.0192283
2_DNTAG0280	2	YIL112W	HOS4	DNTAG0280	0.148353	0.190533	0.327637	0.0745492
2_DNTAG0281	2	YKR029C	SET3	DNTAG0281	0.286198	-0.056207	0.222533	0.00469246
2_DNTAG0283	2	YBR258C	SHG1	DNTAG0283	-0.19593	0.0754045	-0.128449	-0.00291628
2_DNTAG0284	2	YKL017C	HCS1	DNTAG0284	-0.187424	0.129292	-0.069609	-0.139885
2_DNTAG0285	2	YGR230W	BNS1	DNTAG0285	-0.0942414	-0.0754517	-0.177834	0.103071
2_DNTAG0287	2	YDL115C	IWR1	DNTAG0287	0.0731622	-0.0286745	0.029312	0.0398559
2_DNTAG0288	2	YPL130W	SPO19	DNTAG0288	-0.0548329	0.124216	0.0529945	-0.273844
2_DNTAG0289	2	YIL073C	SPO22	DNTAG0289	0.345599	-0.0915254	0.238182	-0.0126374
2_DNTAG0290	2	YNL012W	SPO1	DNTAG0290	-0.1322	0.0231316	-0.119609	0.0318913
2_DNTAG0291	2	YBL009W	ALK2	DNTAG0291	-0.0787934	0.106998	0.020417	-0.121842
2_DNTAG0292	2	YJR094C	IME1	DNTAG0292	-0.112143	0.0740541	-0.0464109	0.0617065
2_DNTAG0293	2	YGR247W	CPD1	DNTAG0293	-0.234035	0.10646	-0.139589	0.102565
2_DNTAG0294	2	YPR007C	REC8	DNTAG0294	-0.126803	-0.105248	-0.243465	0.0866444
2_DNTAG0295	2	YDR285W	ZIP1	DNTAG0295	0.00778119	0.0519507	0.0437106	0.280172
2_DNTAG0296	2	YIL072W	HOP1	DNTAG0296	-0.247602	0.188241	-0.0595557	-0.0416697
2_DNTAG0297	2	YNL082W	PMS1	DNTAG0297	-0.0607041	-0.0649181	-0.130312	-0.111324
2_DNTAG0298	2	YGL251C	HFM1	DNTAG0298	-0.0804086	0.302632	0.189211	-0.154803
2_DNTAG0299	2	YNL025C	SSN8	DNTAG0299	0.570944	0.036574	0.563237	0.108524
2_DNTAG0300	2	YMR198W	CIK1	DNTAG0300	0.455221	-0.0377874	0.396579	0.133348
2_DNTAG0301	2	YPR141C	KAR3	DNTAG0301	0.441853	0.092542	0.52894	0.195598
2_DNTAG0302	2	YFR046C	CNN1	DNTAG0302	-0.240576	0.104897	-0.155448	0.022471
2_DNTAG0303	2	YPL194W	DDC1	DNTAG0303	-0.0358077	-0.0875846	-0.135529	0.0891204
2_DNTAG0304	2	YDR273W	DON1	DNTAG0304	0.0720202	-0.129399	-0.0644851	-0.024726
2_DNTAG0305	2	YPL055C	LGE1	DNTAG0305	-1.8813	0.244563	-1.62164	-0.393017
2_DNTAG0306	2	YGL045W	RIM8	DNTAG0306	0.306556	-0.125977	0.0941055	-0.258644
2_DNTAG0307	2	YOR195W	SLK19	DNTAG0307	-0.126743	-0.0250656	-0.18734	-0.124623
2_DNTAG0308	2	YPL033C	SRL4	DNTAG0308	0.0687978	-0.178383	-0.12073	0.0584792
2_DNTAG0309	2	YPR078C	YPR078C	DNTAG0309	-0.151675	-0.23084	-0.479281	-0.396136
2_DNTAG0310	2	YGL192W	IME4	DNTAG0310	-0.145109	-0.0688445	-0.229164	0.0656057
2_DNTAG0312	2	YJR066W	TOR1	DNTAG0312	-0.0854734	-0.0434619	-0.134706	0.164912
2_DNTAG0313	2	YOR178C	GAC1	DNTAG0313	0.244451	-0.330658	-0.0980122	0.47677
2_DNTAG0315	2	YHL024W	RIM4	DNTAG0315	-0.173636	0.0137353	-0.180289	0.153655
2_DNTAG0316	2	YNL210W	MER1	DNTAG0316	-0.0980304	0.0577679	-0.0451494	-0.108278
2_DNTAG0317	2	YER179W	DMC1	DNTAG0317	-0.178598	0.267196	0.0760424	0.0829251
2_DNTAG0318	2	YGR044C	RME1	DNTAG0318	-0.0538927	-0.10233	-0.169322	-0.00328498
2_DNTAG0319	2	YOL091W	SPO21	DNTAG0319	-0.0428584	-0.0266019	-0.0799877	-0.0480594
2_DNTAG0321	2	YCL055W	KAR4	DNTAG0321	-0.121169	0.022129	-0.126532	-0.0633953
2_DNTAG0322	2	YIL132C	CSM2	DNTAG0322	-0.130994	-0.0698877	-0.212186	0.100908
2_DNTAG0324	2	YER106W	MAM1	DNTAG0324	0.0342511	-0.113108	-0.0890856	-0.02351
2_DNTAG0325	2	YMR048W	CSM3	DNTAG0325	0.210912	-0.13342	0.0546617	-0.0947613
2_DNTAG0326	2	YHL022C	SPO11	DNTAG0326	-0.140533	-0.296279	-0.445334	0.306282
2_DNTAG0327	2	YGL175C	SAE2	DNTAG0327	-0.0327959	0.0170289	-0.0234389	0.0439833
2_DNTAG0328	2	YDR076W	RAD55	DNTAG0328	0.194418	-0.109156	0.0637138	0.0931423
2_DNTAG0329	2	YFL003C	MSH4	DNTAG0329	0.0153255	-0.122574	-0.116726	0.127465
2_DNTAG0331	2	YML128C	MSC1	DNTAG0331	0.169667	-0.119303	0.0400854	0.233219
2_DNTAG0332	2	YLR219W	MSC3	DNTAG0332	0.139449	-0.109077	0.0207544	0.060813
2_DNTAG0334	2	YHR039C	MSC7	DNTAG0334	-0.00449815	0.0125004	-0.0420491	0.133422
2_DNTAG0336	2	YJR021C	REC107	DNTAG0336	-0.118792	0.0288795	-0.0981506	-0.083184
2_DNTAG0338	2	YER173W	RAD24	DNTAG0338	0.0929675	0.0534544	0.133837	-0.0366238
2_DNTAG0339	2	YLR234W	TOP3	DNTAG0339	0.44824	-0.119593	0.299904	0.162439
2_DNTAG0340	2	YBR073W	RDH54	DNTAG0340	-0.0175108	-0.121812	-0.154031	0.099064
2_DNTAG0341	2	YOR368W	RAD17	DNTAG0341	0.12131	-0.193354	-0.101094	-0.04548
2_DNTAG0342	2	YPL121C	MEI5	DNTAG0342	-0.0826678	0.165509	0.069088	-0.497261
2_DNTAG0343	2	YPL164C	MLH3	DNTAG0343	-0.220894	0.200885	-0.0151446	-0.0253166
2_DNTAG0344	2	YIR025W	MND2	DNTAG0344	-0.0954974	0.059002	-0.0617493	-0.129816
2_DNTAG0346	2	YMR133W	REC114	DNTAG0346	-0.0604201	0.139332	0.0709103	-0.0816141
2_DNTAG0347	2	YHR079C-A	SAE3	DNTAG0347	-0.0710199	-0.00544007	-0.0867858	0.103711
2_DNTAG0349	2	YLR329W	REC102	DNTAG0349	0.0834377	0.0825692	0.156479	-0.113578
2_DNTAG0350	2	YHL029C	OCA5	DNTAG0350	-0.124658	-0.061865	-0.1965	-0.124556
2_DNTAG0351	2	YJR108W	ABM1	DNTAG0351	-0.0938505	0.0372326	-0.0572839	-0.0370034
2_DNTAG0352	2	YIL123W	SIM1	DNTAG0352	-0.158867	-0.0339734	-0.203681	0.160608
2_DNTAG0353	2	YOR265W	RBL2	DNTAG0353	0.0788571	0.0952411	0.165822	-0.343866
2_DNTAG0355	2	YER016W	BIM1	DNTAG0355	0.00948904	0.0887149	0.0912225	0.230185
2_DNTAG0357	2	YMR138W	CIN4	DNTAG0357	-0.0369422	-0.07646	-0.134279	-0.0294666
2_DNTAG0358	2	YPL253C	VIK1	DNTAG0358	-0.0134839	0.0278794	0.00465745	-0.102002
2_DNTAG0359	2	YPL241C	CIN2	DNTAG0359	-0.137264	-0.607113	-0.766395	-0.052985
2_DNTAG0360	2	YDR424C	DYN2	DNTAG0360	0.00378068	0.138151	0.123908	-0.363496
2_DNTAG0361	2	YOR033C	EXO1	DNTAG0361	0.0350999	0.176132	0.195919	0.11748
2_DNTAG0362	2	YDR097C	MSH6	DNTAG0362	-0.168436	-0.0158731	-0.194858	-0.257999
2_DNTAG0363	2	YBR272C	HSM3	DNTAG0363	-0.0143963	0.0167097	-0.0105275	0.0526477
2_DNTAG0364	2	YGR144W	THI4	DNTAG0364	0.291806	0.307749	0.378972	-0.855144
2_DNTAG0365	2	YLR190W	MMR1	DNTAG0365	0.688202	-0.297034	0.379055	0.110357
2_DNTAG0366	2	YMR072W	ABF2	DNTAG0366	-0.0197132	-0.0608642	-0.089737	0.162651
2_DNTAG0367	2	YNL213C	RRG9	DNTAG0367	-0.291194	0.00545969	-0.304902	0.0772991
2_DNTAG0368	2	YML058W	SML1	DNTAG0368	-0.0488424	-0.209602	-0.273306	0.214937
2_DNTAG0371	2	YGL021W	ALK1	DNTAG0371	-0.0220805	0.0694609	0.0399875	0.0243919
2_DNTAG0374	2	YMR294W	JNM1	DNTAG0374	0.00938663	0.126174	0.130575	-0.0058219
2_DNTAG0375	2	YMR078C	CTF18	DNTAG0375	0.510127	-0.16396	0.343962	0.2545
2_DNTAG0376	2	YHR191C	CTF8	DNTAG0376	0.44452	-0.148341	0.2787	0.0189162
2_DNTAG0377	2	YCL016C	DCC1	DNTAG0377	0.703049	-0.298657	0.124295	-0.183614
2_DNTAG0378	2	YOL115W	PAP2	DNTAG0378	0.361664	-0.137454	0.137136	0.363819
2_DNTAG0379	2	YML034W	SRC1	DNTAG0379	0.207914	-0.0274002	0.143808	0.277107
2_DNTAG0380	2	YMR190C	SGS1	DNTAG0380	0.483127	-0.168538	0.306886	0.201658
2_DNTAG0381	2	YLR226W	BUR2	DNTAG0381	-0.332229	0.0777471	-0.251343	0.640097
2_DNTAG0382	2	YEL061C	CIN8	DNTAG0382	0.389414	-0.011682	0.368987	-0.067125
2_DNTAG0383	2	YOR073W	SGO1	DNTAG0383	0.801966	-0.386941	0.405205	0.62571
2_DNTAG0385	2	YAL047C	SPC72	DNTAG0385	0.614131	-0.345434	0.259339	0.277555
2_DNTAG0386	2	YML124C	TUB3	DNTAG0386	-0.0754868	-0.0325171	-0.115819	-0.00112395
2_DNTAG0387	2	YMR055C	BUB2	DNTAG0387	0.082182	-0.0636238	0.00753883	0.0441918
2_DNTAG0388	2	YOR026W	BUB3	DNTAG0388	1.05511	-0.2657	0.771359	0.685304
2_DNTAG0389	2	YDR517W	GRH1	DNTAG0389	-0.114979	0.0421761	-0.0815429	0.0298203
2_DNTAG0390	2	YNL164C	IBD2	DNTAG0390	-0.132621	-0.068649	-0.210664	0.200448
2_DNTAG0391	2	YJL030W	MAD2	DNTAG0391	0.354992	0.0239516	0.385337	-0.070322
2_DNTAG0394	2	YNL116W	DMA2	DNTAG0394	-0.0560354	0.1321	0.0607019	-0.0240744
2_DNTAG0395	2	YGL086W	MAD1	DNTAG0395	0.0730375	-0.0056376	0.0609338	0.0391567
2_DNTAG0397	2	YCL029C	BIK1	DNTAG0397	0.0762425	0.0540532	0.126284	-0.0951704
2_DNTAG0398	2	YGL216W	KIP3	DNTAG0398	-0.220893	-0.0917157	-0.320649	0.201139
2_DNTAG0399	2	YJR091C	JSN1	DNTAG0399	0.142376	-0.0629991	0.0643882	-0.244455
2_DNTAG0400	2	YIL040W	APQ12	DNTAG0400	0.0718335	-0.0287149	0.0339425	0.255038
2_DNTAG0401	2	YDR139C	RUB1	DNTAG0401	-0.136451	0.132396	-0.0245508	-0.0319093
2_DNTAG0402	2	YDR289C	RTT103	DNTAG0402	0.0445102	0.051345	0.091281	-0.0950426
2_DNTAG0404	2	YHR154W	RTT107	DNTAG0404	0.313322	-0.0198677	0.270084	-0.00581091
2_DNTAG0405	2	YLL002W	RTT109	DNTAG0405	0.181331	0.139498	0.277349	0.0460424
2_DNTAG0406	2	YBR158W	AMN1	DNTAG0406	-0.179646	-0.142655	-0.348551	0.17303
2_DNTAG0407	2	YDR255C	RMD5	DNTAG0407	0.136929	0.0753253	0.202035	-0.0819404
2_DNTAG0409	2	YGL197W	MDS3	DNTAG0409	0.134298	0.015193	0.141958	-0.0584343
2_DNTAG0411	2	YDR451C	YHP1	DNTAG0411	-0.109574	0.0416737	-0.086367	0.064801
2_DNTAG0412	2	YML027W	YOX1	DNTAG0412	-0.467569	0.22848	-0.26372	-0.0254318
2_DNTAG0413	2	YPL269W	KAR9	DNTAG0413	0.0441643	0.0599372	0.0964749	-0.126992
2_DNTAG0414	2	YOR269W	PAC1	DNTAG0414	-0.0453677	-0.0039023	-0.0588472	-0.0189167
2_DNTAG0415	2	YMR299C	DYN3	DNTAG0415	0.00274798	0.127046	0.124131	0.0912022
2_DNTAG0416	2	YPL155C	KIP2	DNTAG0416	0.255421	0.144942	0.409667	-0.260005
2_DNTAG0417	2	YDR488C	PAC11	DNTAG0417	-0.322645	0.12714	-0.203113	0.0161671
2_DNTAG0418	2	YDR150W	NUM1	DNTAG0418	-0.0493748	-0.00346009	-0.0613825	0.0278994
2_DNTAG0419	2	YHR086W	NAM8	DNTAG0419	-0.065978	-0.22784	-0.304965	0.0197536
2_DNTAG0420	2	YGR129W	SYF2	DNTAG0420	-0.0992187	0.0377054	-0.0740938	-0.0101704
2_DNTAG0422	2	YOR247W	SRL1	DNTAG0422	0.0141794	0.0512785	0.0593832	-0.0166236
2_DNTAG0423	2	YLR082C	SRL2	DNTAG0423	0.166025	-0.103871	0.0486911	0.102364
2_DNTAG0424	2	YKR091W	SRL3	DNTAG0424	-0.16525	0.0155157	-0.158306	-0.0855923
2_DNTAG0426	2	YJR035W	RAD26	DNTAG0426	-0.0186899	-0.0283343	-0.0661983	0.0262935
2_DNTAG0427	2	YMR201C	RAD14	DNTAG0427	0.430352	-0.42984	-0.0428733	0.666327
2_DNTAG0429	2	YJR052W	RAD7	DNTAG0429	0.119226	-0.0958174	0.0147897	0.0359069
2_DNTAG0431	2	YEL037C	RAD23	DNTAG0431	-0.272094	-0.0834955	-0.364566	0.267258
2_DNTAG0433	2	YGR170W	PSD2	DNTAG0433	-0.0371206	0.0341681	-0.0226944	0.116187
2_DNTAG0435	2	YHR014W	SPO13	DNTAG0435	0.138657	-0.0958483	0.03953	0.0233702
2_DNTAG0437	2	YOR349W	CIN1	DNTAG0437	-0.0668142	0.201103	0.122087	-0.129739
2_DNTAG0438	2	YNL148C	ALF1	DNTAG0438	0.364244	-0.0854061	0.0199986	-0.661226
2_DNTAG0439	2	YBR057C	MUM2	DNTAG0439	-0.160464	0.305193	0.135964	-0.188016
2_DNTAG0440	2	YGR161C	RTS3	DNTAG0440	-0.0530899	-0.11202	-0.176273	0.284443
2_DNTAG0441	2	YDR481C	PHO8	DNTAG0441	0.154179	-0.062228	0.0829617	0.230664
2_DNTAG0442	2	YDL236W	PHO13	DNTAG0442	0.0467629	0.475312	0.413702	-0.847632
2_DNTAG0444	2	YER123W	YCK3	DNTAG0444	-0.0227998	-0.0357727	-0.0695431	0.252896
2_DNTAG0445	2	YJL141C	YAK1	DNTAG0445	-0.076638	-0.0249479	-0.126301	0.067946
2_DNTAG0446	2	YMR104C	YPK2	DNTAG0446	0.420775	-0.0190207	0.405618	0.657698
2_DNTAG0447	2	YGR188C	BUB1	DNTAG0447	0.469251	-0.209405	0.226794	0.455159
2_DNTAG0448	2	YBR156C	SLI15	DNTAG0448	0.333011	-0.318434	0.0011442	0.427863
2_DNTAG0451	2	YDR507C	GIN4	DNTAG0451	0.114443	0.0850135	0.181859	0.111654
2_DNTAG0452	2	YKL101W	HSL1	DNTAG0452	0.0167992	-0.0583435	-0.0679244	-0.0023198
2_DNTAG0453	2	YJL106W	IME2	DNTAG0453	-0.220682	-0.0662766	-0.304558	-0.00333312
2_DNTAG0454	2	YCL024W	KCC4	DNTAG0454	-0.0105198	0.0427712	0.0266296	-0.00249219
2_DNTAG0455	2	YCR091W	KIN82	DNTAG0455	5.91869e-06	0.114521	0.106506	-0.0443826
2_DNTAG0456	2	YER129W	SAK1	DNTAG0456	-0.00537474	-0.0471026	-0.0605118	-0.112512
2_DNTAG0457	2	YFL033C	RIM15	DNTAG0457	-0.21681	0.0089262	-0.225981	0.0537228
2_DNTAG0458	2	YDR247W	VHS1	DNTAG0458	-0.0944497	0.003732	-0.100586	-0.0820061
2_DNTAG0459	2	YIL035C	CKA1	DNTAG0459	-0.0351604	4.49472e-05	-0.363978	-0.269885
2_DNTAG0461	2	YGL019W	CKB1	DNTAG0461	-0.105555	-0.202644	-0.326842	0.336281
2_DNTAG0462	2	YOR039W	CKB2	DNTAG0462	0.0182013	-0.0725473	-0.0562729	0.372789
2_DNTAG0463	2	YGR092W	DBF2	DNTAG0463	0.466579	-0.306173	0.144137	0.190256
2_DNTAG0464	2	YPR111W	DBF20	DNTAG0464	-0.117923	0.185521	0.0540897	-0.170411
2_DNTAG0465	2	YKL048C	ELM1	DNTAG0465	0.307565	0.000477733	0.299104	-0.0531679
2_DNTAG0466	2	YOR351C	MEK1	DNTAG0466	-0.00584858	0.016105	0.000444435	0.00754134
2_DNTAG0467	2	YIL095W	PRK1	DNTAG0467	0.178542	-0.0712874	0.093922	-0.119922
2_DNTAG0468	2	YGL158W	RCK1	DNTAG0468	0.0179268	0.145235	0.154384	-0.239414
2_DNTAG0469	2	YLR248W	RCK2	DNTAG0469	0.0970979	0.0519571	0.128391	-0.00867347
2_DNTAG0470	2	YGL190C	CDC55	DNTAG0470	-0.117018	0.212685	0.0734203	-0.0454018
2_DNTAG0471	2	YDL134C	PPH21	DNTAG0471	0.0780666	-0.0932156	-0.0232102	0.0892411
2_DNTAG0472	2	YDL188C	PPH22	DNTAG0472	-0.0302435	-0.145092	-0.184244	0.0999727
2_DNTAG0473	2	YOR014W	RTS1	DNTAG0473	0.0362808	-0.239452	-0.211168	-0.324262
2_DNTAG0474	2	YGR270W	YTA7	DNTAG0474	-0.0205783	0.105123	0.0808448	0.233927
2_DNTAG0475	2	YMR304W	UBP15	DNTAG0475	-0.122329	0.0143446	-0.126851	0.227769
2_DNTAG0476	2	YER144C	UBP5	DNTAG0476	0.36485	-0.311879	0.0459868	0.308285
2_DNTAG0477	2	YGR285C	ZUO1	DNTAG0477	0.0108153	-0.192028	-0.192887	0.822895
2_DNTAG0478	2	YOR027W	STI1	DNTAG0478	0.701514	0.442355	0.364846	-1.263
2_DNTAG0481	2	YHR111W	UBA4	DNTAG0481	-0.368513	0.145858	-0.231808	0.149635
2_DNTAG0482	2	YLR306W	UBC12	DNTAG0482	-0.185332	0.106734	-0.0873277	-0.00565868
2_DNTAG0483	2	YDR092W	UBC13	DNTAG0483	0.229508	-0.0415332	-0.116823	-0.26737
2_DNTAG0484	2	YEL012W	UBC8	DNTAG0484	0.00744638	0.120245	0.122279	-0.141694
2_DNTAG0485	2	YGR184C	UBR1	DNTAG0485	0.046565	0.439544	0.48315	-0.0803981
2_DNTAG0486	2	YPR066W	UBA3	DNTAG0486	-0.126672	0.16176	0.0290246	-0.130408
2_DNTAG0487	2	YPL003W	ULA1	DNTAG0487	-0.0707579	0.0716652	-0.0170309	0.0568534
2_DNTAG0488	2	YMR154C	RIM13	DNTAG0488	0.127533	-0.160631	-0.0405789	0.161625
2_DNTAG0489	2	YHR134W	WSS1	DNTAG0489	0.271736	-0.0683298	0.182749	0.126995
2_DNTAG0490	2	YDR409W	SIZ1	DNTAG0490	-0.0240032	-0.00309427	-0.0350415	-0.020011
2_DNTAG0491	2	YOR156C	NFI1	DNTAG0491	-0.269641	0.117828	-0.182498	0.0597889
2_DNTAG0493	2	YDR144C	MKC7	DNTAG0493	-0.20846	0.0835054	-0.130563	-0.00698834
2_DNTAG0494	2	YKL185W	ASH1	DNTAG0494	-0.188061	-0.0230507	-0.221921	0.0553816
2_DNTAG0495	2	YIL131C	FKH1	DNTAG0495	-0.0878846	-0.000977813	-0.121204	-0.0638126
2_DNTAG0496	2	YNL068C	FKH2	DNTAG0496	-0.336577	0.155011	-0.188463	0.0590351
2_DNTAG0497	2	YLL017W	YLL017W	DNTAG0497	-0.228185	0.106097	-0.13028	-0.164904
2_DNTAG0498	2	YOR101W	RAS1	DNTAG0498	-0.0068685	0.210746	0.179306	-0.38479
2_DNTAG0499	2	YOL110W	SHR5	DNTAG0499	0.0794891	-0.00133798	0.0684117	0.0959866
2_DNTAG0500	2	YIL122W	POG1	DNTAG0500	0.1424	0.0459146	0.171375	-0.0162219
2_DNTAG0501	2	YMR100W	MUB1	DNTAG0501	0.235857	-0.00117296	0.22488	0.073854
2_DNTAG0502	2	YDL056W	MBP1	DNTAG0502	-0.0959552	0.0053177	-0.0981673	0.0167124
2_DNTAG0503	2	YCR020W-B	HTL1	DNTAG0503	-0.172743	0.0596429	-0.12115	0.230229
2_DNTAG0504	2	YDR363W-A	SEM1	DNTAG0504	-0.345222	-0.104244	-0.463723	0.0893476
2_DNTAG0505	2	YBR133C	HSL7	DNTAG0505	0.0361576	-0.00138747	0.0136132	-0.052138
2_DNTAG0506	2	YBL064C	PRX1	DNTAG0506	0.134226	-0.0407578	0.0437199	-0.0113949
2_DNTAG0507	2	YDR453C	TSA2	DNTAG0507	-0.0431099	-0.00778284	-0.0641478	0.00467174
2_DNTAG0508	2	YNL197C	WHI3	DNTAG0508	0.159334	-0.259096	-0.109666	0.507758
2_DNTAG0509	2	YDL224C	WHI4	DNTAG0509	-0.42344	0.21304	-0.21896	0.0256815
2_DNTAG0510	2	YMR199W	CLN1	DNTAG0510	-0.00131038	-0.0385703	-0.0507367	0.0242058
2_DNTAG0512	2	YPL256C	CLN2	DNTAG0512	0.105446	-0.0710634	0.0298248	-0.0879065
2_DNTAG0513	2	YLR003C	CMS1	DNTAG0513	-0.17608	0.141814	-0.043413	-0.0106567
2_DNTAG0514	2	YAL024C	LTE1	DNTAG0514	0.0318709	-0.0316782	-0.00698562	0.0112547
2_DNTAG0515	2	YHR152W	SPO12	DNTAG0515	-0.130187	0.0810045	-0.0606405	0.00370129
2_DNTAG0516	2	YBR186W	PCH2	DNTAG0516	-0.0721844	0.113558	0.0364089	0.0178494
2_DNTAG0517	2	YPL139C	UME1	DNTAG0517	0.191335	0.0477643	0.232092	-0.0807233
2_DNTAG0518	2	YOR230W	WTM1	DNTAG0518	-0.096244	0.0282848	-0.0734775	-0.0822003
2_DNTAG0520	2	YNL078W	NIS1	DNTAG0520	-0.157171	0.298015	0.128374	-0.261652
2_DNTAG0521	2	YBL008W	HIR1	DNTAG0521	-0.0132733	0.0950115	0.0749843	0.0888963
2_DNTAG0522	2	YOR038C	HIR2	DNTAG0522	0.0183313	0.0690802	0.0833348	-0.0533803
2_DNTAG0523	2	YOL012C	HTZ1	DNTAG0523	0.181797	-0.264091	-0.0888847	0.414642
2_DNTAG0524	2	YOL006C	TOP1	DNTAG0524	0.0989781	-0.0269276	0.0399782	0.0171162
2_DNTAG0525	2	YPR023C	EAF3	DNTAG0525	-0.118487	-0.0235858	-0.162068	0.261366
2_DNTAG0526	2	YCR094W	CDC50	DNTAG0526	0.315387	-0.159359	0.142338	0.222569
2_DNTAG0527	2	YOR113W	AZF1	DNTAG0527	0.034385	0.101999	0.126515	-0.374641
2_DNTAG0528	2	YNL021W	HDA1	DNTAG0528	0.00997046	-0.02258	-0.0194597	-0.00254572
2_DNTAG0529	2	YPR068C	HOS1	DNTAG0529	-0.0767743	-0.024404	-0.103908	-0.0807708
2_DNTAG0530	2	YJL168C	SET2	DNTAG0530	0.330339	-0.184475	0.133207	0.19097
2_DNTAG0531	2	YGL194C	HOS2	DNTAG0531	-0.100867	-0.0379867	-0.145882	-0.0414035
2_DNTAG0533	2	YPL022W	RAD1	DNTAG0533	-0.227337	-0.0383121	-0.273024	0.0434053
2_DNTAG0534	2	YML095C	RAD10	DNTAG0534	-0.0547381	0.0269001	-0.0359535	0.0231338
2_DNTAG0535	2	YML058W-A	HUG1	DNTAG0535	-0.283972	-0.0376711	-0.338316	0.139764
2_DNTAG0536	2	YBL088C	TEL1	DNTAG0536	0.00248748	0.0685741	0.0366244	-0.0744371
2_DNTAG0537	2	YER062C	GPP2	DNTAG0537	-0.261434	0.132443	-0.161609	-0.120882
2_DNTAG0538	2	YIL053W	GPP1	DNTAG0538	-0.193631	0.156048	-0.0568163	-0.0505821
2_DNTAG0539	2	YHR206W	SKN7	DNTAG0539	-0.131139	-0.0221068	-0.180363	0.0246746
2_DNTAG0540	2	YNL099C	OCA1	DNTAG0540	0.177854	-0.152125	-0.0584739	-0.0574605
2_DNTAG0541	2	YNR047W	FPK1	DNTAG0541	-0.280441	0.19858	-0.124691	-0.199445
2_DNTAG0542	2	YDR014W	RAD61	DNTAG0542	-0.257035	0.0502243	-0.213984	0.245319
2_DNTAG0543	2	YIL101C	XBP1	DNTAG0543	-0.0105437	0.12603	0.10596	-0.0418
2_DNTAG0544	2	YLL039C	UBI4	DNTAG0544	-0.349476	0.228174	-0.125155	-0.160165
2_DNTAG0545	2	YOR043W	WHI2	DNTAG0545	0.0782448	0.0569946	0.116547	-0.115834
2_DNTAG0546	2	YPR017C	DSS4	DNTAG0546	-0.182222	-0.0668421	-0.269234	0.179629
2_DNTAG0547	2	YNL299W	TRF5	DNTAG0547	0.193378	0.181057	0.363347	-0.316658
2_DNTAG0548	2	YML016C	PPZ1	DNTAG0548	-0.137043	0.254496	0.0928144	-0.407519
2_DNTAG0551	2	YOR177C	MPC54	DNTAG0551	0.00902659	0.0642613	0.0549585	-0.14047
2_DNTAG0552	2	YDR096W	GIS1	DNTAG0552	-0.106244	0.0407876	-0.0788581	-0.119991
2_DNTAG0553	2	YER180C	ISC10	DNTAG0553	0.0658294	0.0189766	0.0774108	-0.0816204
2_DNTAG0554	2	YLR227C	ADY4	DNTAG0554	-0.0158485	-0.00995679	-0.0340581	-0.0761385
2_DNTAG0555	2	YDR512C	EMI1	DNTAG0555	0.217704	-0.308532	-0.0990789	0.0174901
2_DNTAG0556	2	YGL170C	SPO74	DNTAG0556	-0.203518	0.0417373	-0.16939	0.107849
2_DNTAG0557	2	YDL013W	SLX5	DNTAG0557	0.728266	0.0386431	0.770008	0.428559
2_DNTAG0558	2	YER044C-A	MEI4	DNTAG0558	-0.126216	0.0760747	-0.0652588	-0.115585
2_DNTAG0559	2	YGL033W	HOP2	DNTAG0559	0.129422	0.0403987	0.173349	-0.0847702
2_DNTAG0560	2	YOL104C	NDJ1	DNTAG0560	-0.103193	0.0879657	-0.0229774	0.0662745
2_DNTAG0561	2	YLR263W	RED1	DNTAG0561	0.536818	0.172128	-0.0604522	-0.805815
2_DNTAG0563	2	YLR394W	CST9	DNTAG0563	0.101943	0.0368282	0.135291	-0.117721
2_DNTAG0564	2	YDR206W	EBS1	DNTAG0564	-0.0478875	0.156235	0.0969879	-0.274529
2_DNTAG0565	2	YLR233C	EST1	DNTAG0565	0.170302	-0.086921	0.0588788	-0.0171319
2_DNTAG0566	2	YIL009C-A	EST3	DNTAG0566	0.168898	-0.078511	0.079892	0.120069
2_DNTAG0567	2	YLR453C	RIF2	DNTAG0567	-0.166733	0.0613473	-0.116259	0.0238598
2_DNTAG0568	2	YLR318W	EST2	DNTAG0568	0.70088	-1.10402	-0.397734	-0.288827
2_DNTAG0569	2	YBL032W	HEK2	DNTAG0569	-0.0796215	0.121538	0.0317225	0.0584216
2_DNTAG0570	2	YDR545W	YRF1-1	DNTAG0570	-0.0230566	0.0427858	0.0151904	-0.0685707
2_DNTAG0571	2	YER190W	YRF1-2	DNTAG0571	0.110086	-0.00054805	0.0982346	-0.31399
2_DNTAG0573	2	YNL339C	YRF1-6	DNTAG0573	-0.164874	0.0339975	-0.147856	-0.353135
2_DNTAG0574	2	YDR004W	RAD57	DNTAG0574	0.529789	-0.120438	0.391741	0.139079
2_DNTAG0575	2	YDL059C	RAD59	DNTAG0575	0.0831346	-0.120148	-0.0504247	0.0032489
2_DNTAG0576	2	YER095W	RAD51	DNTAG0576	0.520842	0.026081	0.527265	-0.100944
2_DNTAG0577	2	YML032C	RAD52	DNTAG0577	0.86512	-0.421351	0.405834	0.0599361
2_DNTAG0579	2	YLR403W	SFP1	DNTAG0579	-0.118338	0.0250598	-0.104571	-0.00574668
2_DNTAG0580	2	YNL153C	GIM3	DNTAG0580	0.27084	-0.0957747	0.168732	-0.0602883
2_DNTAG0581	2	YEL003W	GIM4	DNTAG0581	0.72175	-0.0958085	0.59652	0.0386887
2_DNTAG0582	2	YML094W	GIM5	DNTAG0582	1.01596	-0.425766	0.569022	0.483613
2_DNTAG0583	2	YGR078C	PAC10	DNTAG0583	0.616011	-0.211695	0.395955	0.316025
2_DNTAG0584	2	YHR200W	RPN10	DNTAG0584	0.16932	0.0478525	0.214181	0.181377
2_DNTAG0586	2	YLR097C	HRT3	DNTAG0586	-0.10834	0.194384	0.0800196	-0.365652
2_DNTAG0589	2	YLR102C	APC9	DNTAG0589	0.481413	-0.439892	-0.00903835	0.663274
2_DNTAG0590	2	YFR036W	CDC26	DNTAG0590	0.0217549	-0.0860175	-0.0819482	-0.0451351
2_DNTAG0593	2	YML088W	UFO1	DNTAG0593	-0.121011	0.0252179	-0.103488	-0.0954654
2_DNTAG0594	2	YGL087C	MMS2	DNTAG0594	-0.0200124	-0.117543	-0.145583	0.115023
2_DNTAG0595	2	YGL058W	RAD6	DNTAG0595	-1.53028	0.266708	-1.41696	-0.890286
2_DNTAG0596	2	YDL190C	UFD2	DNTAG0596	0.0876202	-0.192866	-0.118695	0.263816
2_DNTAG0676	2	YGL078C	DBP3	DNTAG0676	-0.0558798	-0.0905866	-0.161348	-0.29786
2_DNTAG0677	2	YKR024C	DBP7	DNTAG0677	0.32513	0.0556955	0.327151	-0.193746
2_DNTAG0678	2	YGL173C	XRN1	DNTAG0678	0.0277473	0.164913	0.183879	-0.178583
2_DNTAG0679	2	YJL209W	CBP1	DNTAG0679	-0.114544	0.0598967	-0.119408	-0.00512738
2_DNTAG0680	2	YLR256W	HAP1	DNTAG0680	-0.30606	0.281205	-0.0329521	-0.043657
2_DNTAG0681	2	YDR071C	PAA1	DNTAG0681	0.12771	0.0313442	0.140533	-0.128577
2_DNTAG0682	2	YER047C	SAP1	DNTAG0682	0.0770641	0.0289323	0.0956757	-0.158119
2_DNTAG0685	2	YMR019W	STB4	DNTAG0685	-0.309007	-0.0204475	-0.355748	0.0241023
2_DNTAG0686	2	YOL042W	NGL1	DNTAG0686	-0.00404933	-0.017256	-0.0305447	0.0192877
2_DNTAG0687	2	YNR073C	YNR073C	DNTAG0687	0.0447957	-0.173944	-0.131551	0.0490934
2_DNTAG0688	2	YJL105W	SET4	DNTAG0688	-0.990207	1.50311	0.509667	-1.41761
2_DNTAG0689	2	YPL165C	SET6	DNTAG0689	0.0847858	0.0486257	0.128198	-0.333347
2_DNTAG0690	2	YKL072W	STB6	DNTAG0690	0.122485	-0.153453	-0.0443984	-0.0740885
2_DNTAG0691	2	YER130C	COM2	DNTAG0691	-0.193628	0.356554	0.154863	-0.172915
2_DNTAG0692	2	YER184C	TOG1	DNTAG0692	-0.12973	0.172236	0.025359	0.00191583
2_DNTAG0693	2	YJL057C	IKS1	DNTAG0693	-0.00362035	-0.00936492	-0.0245442	0.10365
2_DNTAG0694	2	YJL103C	GSM1	DNTAG0694	0.180673	-0.273356	-0.274477	-0.213699
2_DNTAG0695	2	YJL206C	YJL206C	DNTAG0695	0.0394088	0.0648767	-0.145267	-0.373638
2_DNTAG0696	2	YKL222C	YKL222C	DNTAG0696	0.0936143	0.0432324	0.0483513	-0.120222
2_DNTAG0697	2	YPL230W	USV1	DNTAG0697	-0.0141767	-0.0672718	-0.0899543	-0.231785
2_DNTAG0698	2	YPR196W	YPR196W	DNTAG0698	-0.22497	-0.00305233	-0.245283	-0.129932
2_DNTAG0699	2	YML017W	PSP2	DNTAG0699	-0.133176	-0.0321114	-0.178307	-0.165361
2_DNTAG0700	2	YBR194W	AIM4	DNTAG0700	-0.329198	0.261511	-0.0752635	0.0950958
2_DNTAG0701	2	YDR169C	STB3	DNTAG0701	-0.236857	0.133398	-0.105982	0.0950322
2_DNTAG0702	2	YER139C	RTR1	DNTAG0702	0.550967	-0.197179	0.329603	0.519155
2_DNTAG0703	2	YIL137C	TMA108	DNTAG0703	0.0168245	0.147704	0.167072	-0.290516
2_DNTAG0704	2	YPR115W	RGC1	DNTAG0704	0.0116598	0.110152	0.112161	-0.293927
2_DNTAG0705	2	YGL221C	NIF3	DNTAG0705	-0.139295	-0.00630131	-0.157748	-0.0529831
2_DNTAG0707	2	YDL053C	PBP4	DNTAG0707	0.150188	-0.0630315	0.082282	-0.107893
2_DNTAG0708	2	YHR207C	SET5	DNTAG0708	-0.0166447	0.0553386	0.00702033	0.178527
2_DNTAG0709	2	YBR150C	TBS1	DNTAG0709	-0.0219887	-0.202086	-0.234998	0.135267
2_DNTAG0710	2	YBL054W	TOD6	DNTAG0710	0.0439523	0.0358513	0.0582988	0.376488
2_DNTAG0711	2	YBR239C	ERT1	DNTAG0711	-0.36484	0.176	-0.199927	0.0706752
2_DNTAG0712	2	YJR119C	JHD2	DNTAG0712	0.120823	-0.0262163	0.0850759	-0.280512
2_DNTAG0713	2	YKR064W	OAF3	DNTAG0713	-0.0996122	0.0920031	-0.0200127	-0.138548
2_DNTAG0714	2	YLR327C	TMA10	DNTAG0714	-0.133711	-0.00242569	-0.145483	-0.0179197
2_DNTAG0716	2	YHL018W	YHL018W	DNTAG0716	-0.030736	0.0928824	0.0522298	-0.350695
2_DNTAG0717	2	YKL070W	YKL070W	DNTAG0717	0.011182	0.00743733	0.0279195	0.00615908
2_DNTAG0718	2	YPR125W	YLH47	DNTAG0718	0.0674749	-0.0360977	0.0238346	0.0466069
2_DNTAG0720	2	YDR026C	NSI1	DNTAG0720	-0.0327118	0.0785064	0.0164053	-0.0991528
2_DNTAG0722	2	YDL070W	BDF2	DNTAG0722	0.075286	0.0475775	0.115444	-0.184449
2_DNTAG0723	2	YNL215W	IES2	DNTAG0723	0.109915	0.089231	0.162955	0.164487
2_DNTAG0724	2	YOR189W	IES4	DNTAG0724	0.180515	-0.0403567	0.0103152	0.0856941
2_DNTAG0725	2	YER092W	IES5	DNTAG0725	-0.0854105	-8.84633e-05	-0.118576	-0.203952
2_DNTAG0726	2	YMR075W	RCO1	DNTAG0726	-0.382004	0.0287824	-0.365579	0.262051
2_DNTAG0727	2	YDR257C	RKM4	DNTAG0727	0.0224566	0.0698023	0.0893908	-0.0772354
2_DNTAG0728	2	YGR071C	ENV11	DNTAG0728	0.0724281	0.0505759	0.112997	-0.117082
2_DNTAG0729	2	YIL130W	ASG1	DNTAG0729	0.0361654	-0.0188929	0.00726646	0.0194833
2_DNTAG0730	2	YLR278C	YLR278C	DNTAG0730	0.0639321	0.184509	0.220012	-0.0418928
2_DNTAG0731	2	YML081W	TDA9	DNTAG0731	0.0262353	-0.215277	-0.200023	0.30023
2_DNTAG0732	2	YEL018W	EAF5	DNTAG0732	0.226321	-0.0639202	0.136162	0.0206207
2_DNTAG0733	2	YJR082C	EAF6	DNTAG0733	-0.130312	-0.0104078	-0.150153	0.00493644
2_DNTAG0734	2	YDR482C	CWC21	DNTAG0734	0.294204	0.104818	0.379109	-0.141594
2_DNTAG0735	2	YPL064C	CWC27	DNTAG0735	0.00854661	-0.0426493	-0.0427057	0.0439575
2_DNTAG0736	2	YGR100W	MDR1	DNTAG0736	-0.0693945	0.164359	0.0674528	-0.0068099
2_DNTAG0737	2	YNL175C	NOP13	DNTAG0737	-0.100907	0.123972	0.0190069	0.145139
2_DNTAG0738	2	YER041W	YEN1	DNTAG0738	0.236578	-0.0341657	0.199949	-0.15754
2_DNTAG0739	2	YNL023C	FAP1	DNTAG0739	0.0133399	0.0291626	0.0362045	-0.274206
2_DNTAG0740	2	YJR127C	RSF2	DNTAG0740	0.0885962	-0.00669351	0.0723608	-0.039219
2_DNTAG0741	2	YLL054C	YLL054C	DNTAG0741	0.197659	-0.111283	0.0779219	-0.0523241
2_DNTAG0742	2	YLR436C	ECM30	DNTAG0742	0.113828	-0.0439581	0.0444278	0.415232
2_DNTAG0743	2	YMR176W	ECM5	DNTAG0743	0.0826495	0.0021198	0.0759212	-0.119575
2_DNTAG0744	2	YKR019C	IRS4	DNTAG0744	0.0371008	-0.095954	-0.0743786	-0.136409
2_DNTAG0745	2	YBR065C	ECM2	DNTAG0745	0.0351783	-0.0209781	0.00714441	0.0240841
2_DNTAG0747	2	YBR009C	HHF1	DNTAG0747	-0.0545047	0.281128	0.217377	0.109394
2_DNTAG0748	2	YNL030W	HHF2	DNTAG0748	-0.12058	0.156811	0.00783533	0.0590581
2_DNTAG0750	2	YDR225W	HTA1	DNTAG0750	-0.183252	0.191078	-0.00542014	0.0463494
2_DNTAG0751	2	YBL003C	HTA2	DNTAG0751	0.0948462	-0.0484527	0.0278158	0.0402813
2_DNTAG0752	2	YBL002W	HTB2	DNTAG0752	0.0165863	0.0340219	0.0398936	0.24896
2_DNTAG0753	2	YBR010W	HHT1	DNTAG0753	-0.209064	0.0306416	-0.187106	0.197252
2_DNTAG0755	2	YDR073W	SNF11	DNTAG0755	-0.122216	0.0168839	-0.11472	-0.0324931
2_DNTAG0756	2	YNR023W	SNF12	DNTAG0756	0.182088	-0.0195321	0.154541	0.0170563
2_DNTAG0758	2	YBR289W	SNF5	DNTAG0758	0.407163	-0.130994	0.258412	0.662701
2_DNTAG0759	2	YHL025W	SNF6	DNTAG0759	0.465864	-0.197471	0.256551	0.334275
2_DNTAG0761	2	YDR334W	SWR1	DNTAG0761	0.018136	-0.032208	-0.0219399	0.157565
2_DNTAG0762	2	YFL013C	IES1	DNTAG0762	0.105237	-0.0772703	0.0171503	-0.052826
2_DNTAG0763	2	YLR052W	IES3	DNTAG0763	0.047749	-0.15529	-0.116437	0.104374
2_DNTAG0764	2	YDL002C	NHP10	DNTAG0764	-0.00980195	-0.166447	-0.184836	0.00151525
2_DNTAG0766	2	YLR385C	SWC7	DNTAG0766	-0.0399225	0.0164411	-0.0338652	-0.075939
2_DNTAG0768	2	YMR044W	IOC4	DNTAG0768	-0.037034	0.012601	-0.0477531	-0.0552948
2_DNTAG0769	2	YER164W	CHD1	DNTAG0769	0.251061	-0.496425	-0.248733	0.0364422
2_DNTAG0770	2	YPL129W	TAF14	DNTAG0770	0.95072	-0.400728	0.52992	0.776628
2_DNTAG0771	2	YJL127C	SPT10	DNTAG0771	-0.155193	-0.00440643	-0.177155	0.097408
2_DNTAG0772	2	YGL133W	ITC1	DNTAG0772	0.0369005	0.261735	0.269274	0.129735
2_DNTAG0774	2	YAL011W	SWC3	DNTAG0774	0.0448595	0.0639304	0.110877	0.260633
2_DNTAG0775	2	YBR112C	CYC8	DNTAG0775	-0.037869	0.0837975	0.0398852	-0.111966
2_DNTAG0776	2	YDL076C	RXT3	DNTAG0776	0.328522	0.14724	0.465064	-0.13141
2_DNTAG0777	2	YOL068C	HST1	DNTAG0777	0.117568	-0.0947675	0.0140348	0.0982855
2_DNTAG0778	2	YOR279C	RFM1	DNTAG0778	0.141971	-0.246742	-0.105037	0.170024
2_DNTAG0779	2	YDR439W	LRS4	DNTAG0779	0.230269	-0.25451	-0.0338702	0.320293
2_DNTAG0781	2	YDR363W	ESC2	DNTAG0781	0.273514	0.0343085	0.296239	0.0432631
2_DNTAG0782	2	YDL197C	ASF2	DNTAG0782	-0.132028	0.0120322	-0.12817	-0.0421275
2_DNTAG0783	2	YKR101W	SIR1	DNTAG0783	-0.0443704	0.270795	0.220293	-0.14077
2_DNTAG0784	2	YMR127C	SAS2	DNTAG0784	-0.480347	0.0624863	-0.421436	-0.293947
2_DNTAG0785	2	YLL022C	HIF1	DNTAG0785	-0.210605	0.137699	-0.0849619	0.00578058
2_DNTAG0786	2	YPL015C	HST2	DNTAG0786	-0.139615	0.0430749	-0.114283	-0.127013
2_DNTAG0787	2	YDR191W	HST4	DNTAG0787	0.218969	-0.0125301	0.186152	-0.076131
2_DNTAG0788	2	YOR025W	HST3	DNTAG0788	0.144292	-0.103284	0.0314852	0.031287
2_DNTAG0790	2	YBL052C	SAS3	DNTAG0790	-0.218223	0.214888	-0.0109104	-0.200558
2_DNTAG0791	2	YNL330C	RPD3	DNTAG0791	0.809802	-0.213888	0.587806	0.142586
2_DNTAG0792	2	YMR263W	SAP30	DNTAG0792	0.684702	-0.214923	0.459852	-0.0733553
2_DNTAG0794	2	YBR275C	RIF1	DNTAG0794	0.0519101	0.120589	0.161821	-0.0654798
2_DNTAG0795	2	YAR003W	SWD1	DNTAG0795	0.234924	-0.187162	0.0412217	-0.108199
2_DNTAG0796	2	YDR310C	SUM1	DNTAG0796	-0.0469698	0.164159	0.0924851	0.12608
2_DNTAG0797	2	YDL074C	BRE1	DNTAG0797	-1.99728	-0.0226248	-2.03061	0.0785007
2_DNTAG0798	2	YIL084C	SDS3	DNTAG0798	0.79437	-0.290062	0.493698	0.171545
2_DNTAG0799	2	YLR270W	DCS1	DNTAG0799	0.0293452	0.0579919	0.077179	-0.148731
2_DNTAG0800	2	YGL222C	EDC1	DNTAG0800	-0.0697644	0.119737	0.0381058	0.00907759
2_DNTAG0801	2	YER035W	EDC2	DNTAG0801	-0.0745624	0.130701	0.0521376	-0.0386215
2_DNTAG0803	2	YEL015W	EDC3	DNTAG0803	-0.156252	0.14246	-0.0251699	0.116047
2_DNTAG0804	2	YGR249W	MGA1	DNTAG0804	0.0381903	0.0659437	0.0850016	-0.13827
2_DNTAG0805	2	YKL038W	RGT1	DNTAG0805	0.0374376	0.0665526	0.0683445	-0.157059
2_DNTAG0806	2	YPR134W	MSS18	DNTAG0806	-0.262841	0.0383144	-0.240744	0.176226
2_DNTAG0807	2	YIR021W	MRS1	DNTAG0807	-0.208252	0.211994	0.00124942	-0.10266
2_DNTAG0808	2	YHL038C	CBP2	DNTAG0808	-0.0732331	-0.00226497	-0.0940968	0.0412051
2_DNTAG0811	2	YGL066W	SGF73	DNTAG0811	0.48709	-0.114928	0.358232	0.340748
2_DNTAG0812	2	YDR448W	ADA2	DNTAG0812	0.41771	-0.194956	0.214587	0.475272
2_DNTAG0813	2	YLR055C	SPT8	DNTAG0813	0.252597	-0.0723957	0.0131392	-0.0647376
2_DNTAG0814	2	YDR176W	NGG1	DNTAG0814	0.542125	-0.082233	0.45174	0.242463
2_DNTAG0816	2	YPL116W	HOS3	DNTAG0816	0.105454	-0.114838	-0.0299801	0.147275
2_DNTAG0817	2	YMR053C	STB2	DNTAG0817	0.178983	-0.213698	-0.0432456	-0.0578419
2_DNTAG0818	2	YNL255C	GIS2	DNTAG0818	-0.0992215	0.0896003	-0.0204081	0.130941
2_DNTAG0819	2	YGL252C	RTG2	DNTAG0819	-0.122802	0.0848293	-0.0469245	0.143078
2_DNTAG0820	2	YBR066C	NRG2	DNTAG0820	-0.167703	-0.0203999	-0.195811	0.0523122
2_DNTAG0822	2	YBR212W	NGR1	DNTAG0822	0.372008	-0.396046	-0.0277204	0.286802
2_DNTAG0823	2	YOR076C	SKI7	DNTAG0823	-0.20169	0.000826391	-0.211534	-0.104088
2_DNTAG0824	2	YPR189W	SKI3	DNTAG0824	-0.240066	0.123658	-0.125264	-0.101782
2_DNTAG0825	2	YMR080C	NAM7	DNTAG0825	0.130937	0.00708729	0.117079	-0.0194549
2_DNTAG0826	2	YGR072W	UPF3	DNTAG0826	-0.162702	0.104261	-0.0672551	-0.11706
2_DNTAG0827	2	YLR136C	TIS11	DNTAG0827	-0.125463	-0.0557925	-0.188511	0.0307852
2_DNTAG0828	2	YHR077C	NMD2	DNTAG0828	0.105901	-0.0371369	0.0478288	0.0571893
2_DNTAG0829	2	YPR042C	PUF2	DNTAG0829	0.111653	-0.250062	-0.157586	0.44971
2_DNTAG0830	2	YLL013C	PUF3	DNTAG0830	-0.126561	0.266446	0.135024	-0.284389
2_DNTAG0831	2	YLR363C	NMD4	DNTAG0831	-0.264688	0.057665	-0.254604	0.102512
2_DNTAG0832	2	YNL016W	PUB1	DNTAG0832	-0.128852	-0.0660219	-0.218036	0.230024
2_DNTAG0833	2	YIR001C	SGN1	DNTAG0833	-0.235319	0.0224336	-0.239813	-0.00976326
2_DNTAG0834	2	YER032W	FIR1	DNTAG0834	-0.0241341	0.0695726	0.0300123	-0.18064
2_DNTAG0835	2	YGR178C	PBP1	DNTAG0835	0.0304893	0.0276307	0.0306366	-0.0735789
2_DNTAG0836	2	YIL030C	SSM4	DNTAG0836	-0.922391	0.344405	-0.618807	-0.472242
2_DNTAG0837	2	YKL208W	CBT1	DNTAG0837	-0.0615482	0.132498	0.0624514	-0.0326333
2_DNTAG0838	2	YGL094C	PAN2	DNTAG0838	0.315791	-0.00162972	-0.0161152	-0.869361
2_DNTAG0839	2	YDR195W	REF2	DNTAG0839	-0.612533	0.231294	-0.407844	0.187102
2_DNTAG0841	2	YDL175C	AIR2	DNTAG0841	-0.130614	0.0673666	-0.0704427	0.0199008
2_DNTAG0842	2	YIL079C	AIR1	DNTAG0842	0.152852	-0.0332946	0.115586	-0.040798
2_DNTAG0843	2	YDR432W	NPL3	DNTAG0843	-0.229579	0.175025	-0.049151	-0.602357
2_DNTAG0844	2	YHR015W	MIP6	DNTAG0844	-0.00294741	0.0337725	0.00557174	-0.0856982
2_DNTAG0845	2	YJL140W	RPB4	DNTAG0845	0.335805	-0.108085	0.223401	0.278991
2_DNTAG0847	2	YML062C	MFT1	DNTAG0847	0.609356	-0.00303616	0.481425	-0.422094
2_DNTAG0849	2	YHR167W	THP2	DNTAG0849	0.292592	0.132	0.401381	-0.0785026
2_DNTAG0850	2	YDR159W	SAC3	DNTAG0850	1.17503	-0.333611	0.795839	0.0978041
2_DNTAG0851	2	YDR395W	SXM1	DNTAG0851	-0.118782	0.252706	0.123831	-0.25025
2_DNTAG0853	2	YLR335W	NUP2	DNTAG0853	0.273938	-0.0958593	0.167722	0.0474083
2_DNTAG0854	2	YMR129W	POM152	DNTAG0854	0.0615874	0.0316593	0.0755148	-0.11892
2_DNTAG0855	2	YDL088C	ASM4	DNTAG0855	0.13867	-0.137322	-0.0083707	0.104731
2_DNTAG0856	2	YER107C	GLE2	DNTAG0856	0.405511	-0.146809	0.237425	0.18413
2_DNTAG0858	2	YKL057C	NUP120	DNTAG0858	0.0545252	0.321976	0.371868	-0.240399
2_DNTAG0859	2	YKR082W	NUP133	DNTAG0859	0.846869	-0.212215	0.621478	0.641214
2_DNTAG0860	2	YER105C	NUP157	DNTAG0860	-0.182358	0.170543	-0.0221528	-0.0529431
2_DNTAG0861	2	YBL079W	NUP170	DNTAG0861	0.27775	-0.185938	0.0834409	0.10091
2_DNTAG0862	2	YML103C	NUP188	DNTAG0862	0.142186	-0.0702729	0.0646216	0.153512
2_DNTAG0863	2	YDR192C	NUP42	DNTAG0863	-0.073857	0.0455753	-0.0438693	-0.0505987
2_DNTAG0864	2	YMR153W	NUP53	DNTAG0864	0.0636833	-0.0642009	-0.00863359	0.0330596
2_DNTAG0865	2	YDL116W	NUP84	DNTAG0865	1.07095	-0.241492	0.820137	0.306957
2_DNTAG0866	2	YGL100W	SEH1	DNTAG0866	0.143057	-0.0997934	0.0475867	0.143716
2_DNTAG0867	2	YML113W	DAT1	DNTAG0867	0.13859	-0.0956862	0.0347815	0.0454462
2_DNTAG0868	2	YER161C	SPT2	DNTAG0868	-0.203121	0.0649185	-0.146162	0.399365
2_DNTAG0869	2	YDR443C	SSN2	DNTAG0869	0.185475	0.176045	0.338038	0.201777
2_DNTAG0870	2	YBR050C	REG2	DNTAG0870	-0.00611489	0.162606	0.145866	0.13807
2_DNTAG0871	2	YMR182C	RGM1	DNTAG0871	0.31962	0.0797596	0.402557	-0.299035
2_DNTAG0872	2	YNL167C	SKO1	DNTAG0872	-0.0422474	0.201068	0.164365	0.116774
2_DNTAG0873	2	YCR081W	SRB8	DNTAG0873	0.326601	0.154649	0.467293	0.55492
2_DNTAG0874	2	YOR140W	SFL1	DNTAG0874	-0.115444	-0.0243662	-0.13958	0.0276469
2_DNTAG0875	2	YPR065W	ROX1	DNTAG0875	-0.288217	0.385533	0.0650109	-0.618763
2_DNTAG0876	2	YKL005C	BYE1	DNTAG0876	0.0134315	-0.144962	-0.142919	-0.0545816
2_DNTAG0877	2	YER028C	MIG3	DNTAG0877	-0.181188	0.0752949	-0.115295	-0.0973047
2_DNTAG0879	2	YJL110C	GZF3	DNTAG0879	-0.127915	0.0383678	-0.118135	0.0753117
2_DNTAG0880	2	YDR005C	MAF1	DNTAG0880	0.128141	0.126345	0.245579	-0.144825
2_DNTAG0882	2	YDR207C	UME6	DNTAG0882	0.248979	0.149232	0.388242	0.0193594
2_DNTAG0883	2	YML029W	USA1	DNTAG0883	0.104379	-0.035336	0.0606215	0.0559546
2_DNTAG0884	2	YDR163W	CWC15	DNTAG0884	0.0575708	-0.036952	0.0164664	0.0635776
2_DNTAG0885	2	YPR101W	SNT309	DNTAG0885	1.02838	-0.480466	0.526514	0.882809
2_DNTAG0886	2	YMR125W	STO1	DNTAG0886	-0.154172	-0.0599939	-0.222858	0.145506
2_DNTAG0888	2	YBR119W	MUD1	DNTAG0888	0.0751355	0.029899	0.096497	-0.240836
2_DNTAG0889	2	YNL286W	CUS2	DNTAG0889	-0.00775662	0.187733	0.173203	-0.00338927
2_DNTAG0892	2	YPL213W	LEA1	DNTAG0892	0.439635	-0.277066	0.113566	0.454165
2_DNTAG0893	2	YJR050W	ISY1	DNTAG0893	-0.103584	-0.0121176	-0.119773	0.299035
2_DNTAG0894	2	YBR188C	NTC20	DNTAG0894	0.130344	0.0937648	0.213283	0.120827
2_DNTAG0897	2	YOR308C	SNU66	DNTAG0897	-0.00944083	-0.00574591	-0.0352784	-0.0272165
2_DNTAG0898	2	YHR165C	PRP8	DNTAG0898	-0.150433	0.0131951	-0.14516	-0.0194994
2_DNTAG0899	2	YDR378C	LSM6	DNTAG0899	0.704118	-0.14298	0.559818	0.265206
2_DNTAG0901	2	YOR185C	GSP2	DNTAG0901	-0.0573469	0.0907115	0.0247183	-0.00915215
2_DNTAG0902	2	YLR018C	POM34	DNTAG0902	0.0947369	-0.00683104	0.0769401	0.11819
2_DNTAG0903	2	YKR092C	SRP40	DNTAG0903	-0.366747	0.0437652	-0.349244	0.131956
2_DNTAG0904	2	YAR002W	NUP60	DNTAG0904	0.429637	-0.0828753	0.339373	0.121724
2_DNTAG0905	2	YPR018W	RLF2	DNTAG0905	0.240172	-0.110189	0.1223	-0.061331
2_DNTAG0906	2	YOR023C	AHC1	DNTAG0906	-0.0458209	-0.0205292	-0.0722879	-0.102232
2_DNTAG0907	2	YAL051W	OAF1	DNTAG0907	0.0631211	-0.113853	-0.0594517	-0.0237477
2_DNTAG0908	2	YOR363C	PIP2	DNTAG0908	0.230967	0.056889	0.280701	-0.161192
2_DNTAG0909	2	YGR233C	PHO81	DNTAG0909	-0.0329	0.00136508	-0.0412528	-0.0857141
2_DNTAG0910	2	YFR034C	PHO4	DNTAG0910	0.18946	0.0531973	0.227631	-0.243161
2_DNTAG0912	2	YNL004W	HRB1	DNTAG0912	0.0120037	0.0639643	0.0350837	-0.234091
2_DNTAG0913	2	YKL214C	YRA2	DNTAG0913	-0.113676	0.0610369	-0.0612663	-0.0731123
2_DNTAG0914	2	YPL181W	CTI6	DNTAG0914	-0.0872825	0.0645525	-0.0401058	-0.107342
2_DNTAG0915	2	YIR018W	YAP5	DNTAG0915	0.0866991	0.149157	0.239179	-0.264003
2_DNTAG0916	2	YDR259C	YAP6	DNTAG0916	0.122261	0.174212	0.285425	-0.0097861
2_DNTAG0917	2	YOL028C	YAP7	DNTAG0917	0.0371005	0.0620053	0.0896569	-0.141944
2_DNTAG0918	2	YHR006W	STP2	DNTAG0918	0.0640544	-0.113967	-0.062367	0.249169
2_DNTAG0919	2	YOR298C-A	MBF1	DNTAG0919	-0.15683	-0.0229816	-0.18756	-0.0165668
2_DNTAG0920	2	YBR182C	SMP1	DNTAG0920	0.29208	-0.172071	0.104779	-0.241825
2_DNTAG0921	2	YMR042W	ARG80	DNTAG0921	0.0137616	-0.0417952	-0.0384287	-0.00642468
2_DNTAG0922	2	YOL108C	INO4	DNTAG0922	0.00631745	-0.0781051	-0.0787652	-0.0355666
2_DNTAG0923	2	YPR005C	HAL1	DNTAG0923	0.0914385	-0.158632	-0.0954414	0.0766373
2_DNTAG0924	2	YDR423C	CAD1	DNTAG0924	0.0656934	-0.0445055	0.0098655	0.153064
2_DNTAG0927	2	YDR421W	ARO80	DNTAG0927	0.221561	0.0318779	0.233637	0.0837817
2_DNTAG0928	2	YMR280C	CAT8	DNTAG0928	0.620329	0.174006	-0.0747917	-0.570625
2_DNTAG0929	2	YDR123C	INO2	DNTAG0929	0.0948494	-0.00330854	0.0811647	0.0547754
2_DNTAG0930	2	YMR021C	MAC1	DNTAG0930	0.245561	-0.0336873	0.184457	-0.244679
2_DNTAG0931	2	YKL015W	PUT3	DNTAG0931	-0.129071	0.0935717	-0.0443738	0.0416824
2_DNTAG0933	2	YMR039C	SUB1	DNTAG0933	0.11356	-0.0479607	0.0606695	-0.0024024
2_DNTAG0935	2	YGL071W	AFT1	DNTAG0935	0.0805745	-0.0183037	0.0522532	0.0584343
2_DNTAG0936	2	YGL254W	FZF1	DNTAG0936	-0.0250597	0.0534884	0.0197885	-0.0309469
2_DNTAG0937	2	YDR463W	STP1	DNTAG0937	0.420071	-1.39819	-0.972713	0.14615
2_DNTAG0939	2	YIR033W	MGA2	DNTAG0939	0.406332	-0.141258	0.245772	0.272353
2_DNTAG0940	2	YKL020C	SPT23	DNTAG0940	-0.0834262	0.132175	0.0411699	0.0481462
2_DNTAG0944	2	YPR073C	LTP1	DNTAG0944	-0.195335	0.24585	0.0208974	0.155863
2_DNTAG0945	2	YGL208W	SIP2	DNTAG0945	0.0143231	0.0375766	0.0354672	0.0443534
2_DNTAG0946	2	YDR422C	SIP1	DNTAG0946	-0.101151	0.047265	-0.0639188	-0.116389
2_DNTAG0952	2	YGL213C	SKI8	DNTAG0952	-0.145139	-0.0913231	-0.24721	0.129547
2_DNTAG0954	2	YPL072W	UBP16	DNTAG0954	-0.137689	0.0300183	-0.114605	0.0952284
2_DNTAG0955	2	YNL186W	UBP10	DNTAG0955	-0.176319	0.407977	0.22326	0.116335
2_DNTAG0956	2	YFR010W	UBP6	DNTAG0956	-0.856464	0.166514	-0.69789	0.018227
2_DNTAG0957	2	YMR223W	UBP8	DNTAG0957	0.0224351	0.0826289	0.0863794	0.261304
2_DNTAG0958	2	YDR457W	TOM1	DNTAG0958	-0.0144503	0.0392417	0.01238	0.0394784
2_DNTAG0959	2	YDR335W	MSN5	DNTAG0959	0.411022	-0.157037	0.247741	0.0366849
2_DNTAG0960	2	YBR165W	UBS1	DNTAG0960	-0.119585	-0.0186255	-0.146853	0.0334172
2_DNTAG0961	2	YIL149C	MLP2	DNTAG0961	0.0809363	0.155936	0.214447	-0.0565473
2_DNTAG0963	2	YGL241W	KAP114	DNTAG0963	-0.0655824	0.00558298	-0.0642671	0.155498
2_DNTAG0965	2	YJR132W	NMD5	DNTAG0965	0.151718	-0.213277	-0.0643138	0.527828
2_DNTAG0967	2	YPL125W	KAP120	DNTAG0967	0.215059	0.0186894	0.217598	0.116017
2_DNTAG0968	2	YBR017C	KAP104	DNTAG0968	-0.0472816	0.0438247	-0.0292981	0.0192666
2_DNTAG0969	2	YGL016W	KAP122	DNTAG0969	-0.0277526	0.11058	0.0711133	0.376752
2_DNTAG0970	2	YJR147W	HMS2	DNTAG0970	0.0320564	0.169494	0.129853	0.0428398
2_DNTAG0971	2	YKL043W	PHD1	DNTAG0971	0.0167473	-0.00526431	0.00824501	0.272215
2_DNTAG0972	2	YIL010W	DOT5	DNTAG0972	0.173784	-0.249965	-0.0969983	-0.114259
2_DNTAG0973	2	YNL229C	URE2	DNTAG0973	-0.0579097	-0.304123	-0.366116	0.738331
2_DNTAG0974	2	YOL001W	PHO80	DNTAG0974	0.10007	-0.194972	-0.102392	0.104093
2_DNTAG0975	2	YNL278W	CAF120	DNTAG0975	-0.108606	0.144886	0.0255795	-0.0762372
2_DNTAG0976	2	YGR134W	CAF130	DNTAG0976	-0.171624	0.125718	-0.0594434	0.0409686
2_DNTAG0977	2	YNL288W	CAF40	DNTAG0977	0.126985	-0.0238604	-0.52207	-0.311511
2_DNTAG0978	2	YGL151W	NUT1	DNTAG0978	-0.0524766	0.142812	0.0825196	0.0113906
2_DNTAG0979	2	YMR179W	SPT21	DNTAG0979	-0.153673	0.0210538	-0.147839	0.521963
2_DNTAG0980	2	YPL101W	ELP4	DNTAG0980	-0.111951	-0.0227095	-0.14169	0.210042
2_DNTAG0981	2	YGR200C	ELP2	DNTAG0981	0.172427	-0.116985	0.0112254	0.329219
2_DNTAG0982	2	YMR312W	ELP6	DNTAG0982	-0.082731	-0.0295223	-0.11819	0.380722
2_DNTAG0983	2	YHR187W	IKI1	DNTAG0983	-0.215575	0.0948311	-0.135951	0.402813
2_DNTAG0984	2	YPL086C	ELP3	DNTAG0984	-0.145657	-0.0504161	-0.20085	0.116081
2_DNTAG0985	2	YLR384C	IKI3	DNTAG0985	-0.171907	0.173192	-0.0520878	0.0119446
2_DNTAG0986	2	YHL009C	YAP3	DNTAG0986	0.00199674	0.0435741	0.0364608	0.00704011
2_DNTAG0987	2	YAL021C	CCR4	DNTAG0987	0.0304149	-0.210903	-0.185504	0.218562
2_DNTAG0988	2	YIL038C	NOT3	DNTAG0988	-0.208126	0.242239	0.00858263	-0.257496
2_DNTAG0990	2	YNR052C	POP2	DNTAG0990	0.145023	0.00293991	0.144065	0.0789955
2_DNTAG0993	2	YBR089C-A	NHP6B	DNTAG0993	-0.119806	0.0108344	-0.120121	-0.0461464
2_DNTAG0994	2	YBL005W	PDR3	DNTAG0994	-0.182314	-0.0795965	-0.268034	-0.0699877
2_DNTAG0995	2	YOR028C	CIN5	DNTAG0995	0.0571408	0.101065	0.136658	-0.151766
2_DNTAG0997	2	YIR017C	MET28	DNTAG0997	-0.150898	-0.0347405	-0.193954	-0.0669587
2_DNTAG0998	2	YDR043C	NRG1	DNTAG0998	-0.183753	0.105282	-0.0867346	0.0384671
2_DNTAG0999	2	YGL013C	PDR1	DNTAG0999	-0.00561862	-0.0670829	-0.0688434	0.0393713
2_DNTAG1000	2	YJL056C	ZAP1	DNTAG1000	0.153569	-0.203021	-0.0612436	0.225032
2_DNTAG1001	2	YHR099W	TRA1	DNTAG1001	-0.117404	0.0317966	-0.101128	-0.0863819
2_DNTAG1002	2	YOL004W	SIN3	DNTAG1002	0.642455	-0.132202	0.48847	0.174656
2_DNTAG1003	2	YAL013W	DEP1	DNTAG1003	0.606938	-0.197643	0.390454	0.0759987
2_DNTAG1004	2	YER088C	DOT6	DNTAG1004	0.0722554	0.00820054	0.0740045	-0.211489
2_DNTAG1005	2	YNL136W	EAF7	DNTAG1005	-0.0337287	0.00105166	-0.124711	-0.223008
2_DNTAG1006	2	YGL115W	SNF4	DNTAG1006	0.487225	-0.18623	0.324981	-0.0204149
2_DNTAG1007	2	YOR047C	STD1	DNTAG1007	-0.142877	0.0164885	-0.142652	-0.0816918
2_DNTAG1008	2	YGL035C	MIG1	DNTAG1008	0.0578956	0.120038	0.173041	-0.109032
2_DNTAG1009	2	YIR023W	DAL81	DNTAG1009	0.147465	-0.0646411	0.0741623	-0.0711693
2_DNTAG1010	2	YLR451W	LEU3	DNTAG1010	0.0823128	0.0795992	0.154107	-0.111318
2_DNTAG1011	2	YGL209W	MIG2	DNTAG1011	-0.297126	-0.0197239	-0.334175	0.117103
2_DNTAG1012	2	YJL089W	SIP4	DNTAG1012	-0.0564982	0.10247	0.0398723	-0.18708
2_DNTAG1013	2	YPR009W	SUT2	DNTAG1013	-0.0695988	0.0121682	-0.0673183	0.0345099
2_DNTAG1014	2	YFL031W	HAC1	DNTAG1014	-0.0761188	0.22129	0.135694	-0.386703
2_DNTAG1015	2	YGL162W	SUT1	DNTAG1015	0.0447628	-0.0347143	-0.00525404	0.110675
2_DNTAG1016	2	YDL170W	UGA3	DNTAG1016	-0.184625	0.163808	-0.0356343	-0.0620892
2_DNTAG1017	2	YPL038W	MET31	DNTAG1017	-0.128102	0.147961	0.0101534	0.0409927
2_DNTAG1018	2	YFL028C	CAF16	DNTAG1018	0.0347646	0.203501	0.230111	-0.1412
2_DNTAG1020	2	YKR036C	CAF4	DNTAG1020	0.0114716	-0.152606	-0.158081	-0.0307195
2_DNTAG1021	2	YPL127C	HHO1	DNTAG1021	-0.109231	-0.0171543	-0.138012	-0.0768889
2_DNTAG1024	2	YGR063C	SPT4	DNTAG1024	1.15354	-0.366588	0.780119	0.520083
2_DNTAG1025	2	YDR009W	GAL3	DNTAG1025	0.0782019	-0.0213681	0.046812	-0.125071
2_DNTAG1026	2	YML051W	GAL80	DNTAG1026	0.0220944	-0.157117	-0.140097	0.0481752
2_DNTAG1027	2	YNL027W	CRZ1	DNTAG1027	0.293299	-0.263498	0.017537	0.371
2_DNTAG1028	2	YLR098C	CHA4	DNTAG1028	0.207708	0.0143518	0.200689	-0.252574
2_DNTAG1029	2	YGR288W	MAL13	DNTAG1029	0.103434	-0.140702	-0.0476495	-0.148077
2_DNTAG1030	2	YBR297W	MAL33	DNTAG1030	0.168704	0.077244	0.239923	-0.311633
2_DNTAG1031	2	YLR014C	PPR1	DNTAG1031	0.007409	0.109193	0.110959	-0.122657
2_DNTAG1032	2	YPL248C	GAL4	DNTAG1032	0.0367155	0.131643	0.15935	-0.0933182
2_DNTAG1033	2	YML076C	WAR1	DNTAG1033	0.0317442	-0.0393361	-0.0153981	-0.03149
2_DNTAG1034	2	YNL239W	LAP3	DNTAG1034	-0.010572	0.045915	0.0187083	-0.306976
2_DNTAG1035	2	YML007W	YAP1	DNTAG1035	-0.24974	0.0538901	-0.198545	0.0426365
2_DNTAG1037	2	YKL062W	MSN4	DNTAG1037	-0.0289921	0.12498	0.083243	-0.0442688
2_DNTAG1038	2	YLR266C	PDR8	DNTAG1038	-0.0474656	0.132753	-0.14369	-0.63963
2_DNTAG1039	2	YMR037C	MSN2	DNTAG1039	-0.261202	0.232565	-0.0381416	-0.164008
2_DNTAG1041	2	YPL133C	RDS2	DNTAG1041	-0.134613	0.125975	-0.0383274	-0.036212
2_DNTAG1043	2	YPL029W	SUV3	DNTAG1043	0.0466064	-0.142339	-0.104288	0.187586
2_DNTAG1044	2	YMR287C	DSS1	DNTAG1044	0.256273	0.0896632	0.33956	-0.114268
2_DNTAG1045	2	YKL149C	DBR1	DNTAG1045	-0.150543	0.020438	-0.140416	-0.0101796
2_DNTAG1046	2	YOL054W	PSH1	DNTAG1046	0.0284553	0.0616388	0.0780651	0.0852602
2_DNTAG1047	2	YLR418C	CDC73	DNTAG1047	-0.398737	-0.130806	-0.533351	0.080986
2_DNTAG1049	2	YNL230C	ELA1	DNTAG1049	0.124672	0.0330494	0.12887	-0.100937
2_DNTAG1050	2	YPL046C	ELC1	DNTAG1050	-0.0862845	0.145318	0.0513408	-0.0891592
2_DNTAG1051	2	YPR129W	SCD6	DNTAG1051	-0.157463	0.0188629	-0.154714	0.0636979
2_DNTAG1052	2	YHR121W	LSM12	DNTAG1052	-0.226583	0.138291	-0.0956401	-0.0602662
2_DNTAG1053	2	YHL034C	SBP1	DNTAG1053	-0.0150829	-0.0155545	-0.0384146	0.0759482
2_DNTAG1054	2	YLR107W	REX3	DNTAG1054	-0.0280378	-0.142203	-0.189997	0.310644
2_DNTAG1055	2	YLR059C	REX2	DNTAG1055	-0.0321126	-0.00940505	-0.0506527	0.00540253
2_DNTAG1056	2	YOR017W	PET127	DNTAG1056	-0.17856	0.0720096	-0.114212	0.0404384
2_DNTAG1057	2	YMR180C	CTL1	DNTAG1057	0.178582	-0.132522	0.03699	0.288601
2_DNTAG1058	2	YFL001W	DEG1	DNTAG1058	0.886556	-0.259492	0.623546	-0.0917338
2_DNTAG1059	2	YDR194C	MSS116	DNTAG1059	0.0147654	0.0600541	0.0740455	0.204035
2_DNTAG1060	2	YJL133W	MRS3	DNTAG1060	-0.00820037	-0.0530549	-0.0719735	0.0433873
2_DNTAG1061	2	YKR052C	MRS4	DNTAG1061	-0.0728191	-0.0647278	-0.148493	-0.092449
2_DNTAG1062	2	YMR285C	NGL2	DNTAG1062	-0.214753	0.104091	-0.118451	-0.0808329
2_DNTAG1063	2	YLR293C	GSP1	DNTAG1063	-0.0869885	0.134847	0.0369719	-0.453624
2_DNTAG1064	2	YPL157W	TGS1	DNTAG1064	0.361926	-0.327545	0.0245529	0.242939
2_DNTAG1065	2	YPR057W	BRR1	DNTAG1065	0.366604	-0.12833	0.231491	0.102793
2_DNTAG1066	2	YIR005W	IST3	DNTAG1066	0.286253	-0.082058	0.183863	0.424242
2_DNTAG1067	2	YHL027W	RIM101	DNTAG1067	-0.143551	0.0624036	-0.0879113	0.102167
2_DNTAG1068	2	YDR392W	SPT3	DNTAG1068	0.172238	-0.275367	-0.135291	0.443245
2_DNTAG1069	2	YLR399C	BDF1	DNTAG1069	-0.200906	0.0701864	-0.140116	-0.185317
2_DNTAG1071	2	YOR337W	TEA1	DNTAG1071	-0.170792	0.200084	0.0138307	-0.349225
2_DNTAG1072	2	YMR070W	MOT3	DNTAG1072	-0.271478	0.386106	0.0978852	-0.379838
2_DNTAG1073	2	YMR136W	GAT2	DNTAG1073	-0.190965	0.135567	-0.400162	-0.782971
2_DNTAG1074	2	YLR013W	GAT3	DNTAG1074	-0.0697654	0.0396375	-0.0370025	-0.0399946
2_DNTAG1075	2	YIR013C	GAT4	DNTAG1075	0.064162	0.0770236	0.133629	-0.06779
2_DNTAG1076	2	YMR228W	MTF1	DNTAG1076	-0.00943675	-0.0634551	-0.0758728	-0.00208711
2_DNTAG1078	2	YDR156W	RPA14	DNTAG1078	0.209501	-0.114429	0.0863149	0.126043
2_DNTAG1080	2	YJL148W	RPA34	DNTAG1080	-0.513636	0.0612322	-0.487409	0.865593
2_DNTAG1082	2	YOR295W	UAF30	DNTAG1082	0.584347	-0.330429	0.247404	0.468858
2_DNTAG1084	2	YOL051W	GAL11	DNTAG1084	0.645249	-0.0231627	0.556212	-0.193079
2_DNTAG1085	2	YPR070W	MED1	DNTAG1085	0.101201	-0.0110255	0.0618863	0.417396
2_DNTAG1086	2	YDL005C	MED2	DNTAG1086	0.66663	0.286418	0.939363	-0.592691
2_DNTAG1088	2	YNL236W	SIN4	DNTAG1088	0.120345	-0.0988996	-0.0106768	0.0933271
2_DNTAG1089	2	YHR041C	SRB2	DNTAG1089	1.31006	-0.653316	0.648749	1.22545
2_DNTAG1092	2	YOR123C	LEO1	DNTAG1092	-0.280431	-0.0400588	-0.331092	0.31397
2_DNTAG1093	2	YGL244W	RTF1	DNTAG1093	-1.69004	-0.30698	-2.0145	0.155206
2_DNTAG1094	2	YOL145C	CTR9	DNTAG1094	-0.0171748	0.13267	0.107005	-0.0510177
2_DNTAG1097	2	YNR010W	CSE2	DNTAG1097	0.469882	-0.162442	0.299395	0.575743
2_DNTAG1099	2	YPL047W	SGF11	DNTAG1099	0.370803	-0.00769272	0.354768	0.0383809
2_DNTAG1100	2	YBL103C	RTG3	DNTAG1100	-0.0556892	0.197313	0.150608	0.00375125
2_DNTAG1101	2	YER045C	ACA1	DNTAG1101	-0.0652961	-0.102812	-0.184342	0.0117279
2_DNTAG1102	2	YPR008W	HAA1	DNTAG1102	-0.177979	0.0507111	-0.132366	-0.0341002
2_DNTAG1103	2	YNL257C	SIP3	DNTAG1103	0.00453986	0.120695	0.106336	-0.0534205
2_DNTAG1105	2	YGL166W	CUP2	DNTAG1105	-0.0339713	0.0207585	-0.0269158	-0.024437
2_DNTAG1106	2	YIL036W	CST6	DNTAG1106	-0.0947375	0.206011	0.0994402	-0.110319
2_DNTAG1107	2	YPL177C	CUP9	DNTAG1107	0.0547709	0.33715	0.381635	-0.213755
2_DNTAG1108	2	YCR065W	HCM1	DNTAG1108	-0.0252604	0.179199	0.139987	-0.175241
2_DNTAG1109	2	YOL089C	HAL9	DNTAG1109	-0.0473516	0.125978	0.0714477	-0.0221967
2_DNTAG1110	2	YFL021W	GAT1	DNTAG1110	0.056461	0.0367297	0.0503335	0.00395587
2_DNTAG1112	2	YPL202C	AFT2	DNTAG1112	-0.182509	0.282844	0.0961132	-0.393191
2_DNTAG1113	2	YNL314W	DAL82	DNTAG1113	0.0708617	-0.0626569	-0.0107038	-0.0209162
2_DNTAG1114	2	YOR179C	SYC1	DNTAG1114	0.222138	-0.148867	0.0489249	0.206932
2_DNTAG1115	2	YDR216W	ADR1	DNTAG1115	-0.167158	0.132145	-0.0440444	-0.27917
2_DNTAG1117	2	YKR034W	DAL80	DNTAG1117	0.161086	-0.174029	-0.0297237	0.398406
2_DNTAG1119	2	YHR178W	STB5	DNTAG1119	0.0369869	-0.13758	-0.107449	0.000498085
2_DNTAG1121	2	YKL109W	HAP4	DNTAG1121	-0.262929	0.0369571	-0.233958	0.0583673
2_DNTAG1122	2	YGL237C	HAP2	DNTAG1122	-0.0419111	-0.0698118	-0.121795	-0.0036199
2_DNTAG1123	2	YBL021C	HAP3	DNTAG1123	-0.00175298	-0.0645005	-0.0694571	0.0938516
2_DNTAG1124	2	YOR358W	HAP5	DNTAG1124	0.0281692	0.115281	0.129612	-0.163163
2_DNTAG1125	2	YER063W	THO1	DNTAG1125	0.0112227	0.0614126	0.0708538	-0.0877894
2_DNTAG1126	2	YMR012W	CLU1	DNTAG1126	0.0605394	0.170776	0.166409	-0.115845
2_DNTAG1127	2	YPL119C	DBP1	DNTAG1127	-0.046312	0.126573	0.0618237	-0.0229617
2_DNTAG1129	2	YKL054C	DEF1	DNTAG1129	0.211688	0.221994	0.424013	-0.622546
2_DNTAG1130	2	YDR143C	SAN1	DNTAG1130	0.0992894	0.27306	0.302264	-0.034279
2_DNTAG1131	2	YNL085W	MKT1	DNTAG1131	-0.132552	0.212296	0.0609702	-0.0465504
2_DNTAGbre1KO	2	BRE1_Plate2	BRE1	DNTAGbre1KO	-1.35993	-0.0638067	-1.44886	-0.307486
2_DNTAGdot1KO	2	DOT1_Plate2	DOT1	DNTAGdot1KO	0.252895	-2.28928	-2.07617	0.0118503
2_DNTAGDot1OE	2	DOT1OE_Plate2	DOT1OE	DNTAGDot1OE	2.92689	-0.932384	1.9265	0.0230352
3_DNTAG0001	3	YDR534C	FIT1	DNTAG0001	0.358629	-0.0933157	0.239775	0.128338
3_DNTAG0003	3	YOR383C	FIT3	DNTAG0003	-0.137677	0.126112	-0.020461	0.192781
3_DNTAG0004	3	YJR150C	DAN1	DNTAG0004	-0.0591914	-0.0404316	-0.116228	0.0798338
3_DNTAG0005	3	YPL163C	SVS1	DNTAG0005	-0.233135	0.294884	0.0449275	-0.070109
3_DNTAG0006	3	YFL010W-A	AUA1	DNTAG0006	0.259647	-0.322659	-0.125229	0.181847
3_DNTAG0008	3	YBL086C	YBL086C	DNTAG0008	0.0839654	0.123052	0.203327	0.218763
3_DNTAG0009	3	YGR201C	YGR201C	DNTAG0009	0.122991	-0.143976	-0.0261937	0.529515
3_DNTAG0010	3	YMR279C	YMR279C	DNTAG0010	0.458879	-0.174172	0.252271	0.5503
3_DNTAG0011	3	YCR045C	RRT12	DNTAG0011	0.00597038	-0.0647425	-0.0587975	0.154487
3_DNTAG0012	3	YIL170W	HXT12	DNTAG0012	0.0811778	-0.0863204	-0.0134824	0.185118
3_DNTAG0013	3	YJL165C	HAL5	DNTAG0013	0.0954479	-0.339647	-0.242811	0.414508
3_DNTAG0014	3	YIL009W	FAA3	DNTAG0014	0.114954	0.00982677	0.100415	-0.10064
3_DNTAG0015	3	YKL198C	PTK1	DNTAG0015	0.179483	0.064467	0.236876	-0.0227927
3_DNTAG0016	3	YLL019C	KNS1	DNTAG0016	0.102152	-0.136725	-0.0404783	0.0256584
3_DNTAG0017	3	YPR200C	ARR2	DNTAG0017	0.122525	0.0244979	0.141472	-0.110539
3_DNTAG0018	3	YDR277C	MTH1	DNTAG0018	0.040254	0.199159	0.234358	-0.0258056
3_DNTAG0019	3	YPL244C	HUT1	DNTAG0019	-0.0643792	0.132682	0.0489093	0.0012938
3_DNTAG0020	3	YEL062W	NPR2	DNTAG0020	-0.0928125	0.186058	0.0892873	0.0437652
3_DNTAG0021	3	YIR036C	IRC24	DNTAG0021	-0.141931	0.0325653	-0.115148	-0.0219206
3_DNTAG0022	3	YOR267C	HRK1	DNTAG0022	-0.0995141	0.118789	-0.0500929	0.00179569
3_DNTAG0023	3	YPL026C	SKS1	DNTAG0023	-0.0866039	0.0152543	-0.0783346	0.118934
3_DNTAG0025	3	YNL264C	PDR17	DNTAG0025	-0.0452604	0.123924	0.0755473	-0.0512598
3_DNTAG0027	3	YOR031W	CRS5	DNTAG0027	0.00743407	0.0401704	0.0150042	0.00175659
3_DNTAG0028	3	YGR088W	CTT1	DNTAG0028	0.128101	0.0152576	0.136548	0.0619483
3_DNTAG0029	3	YPL226W	NEW1	DNTAG0029	0.159984	0.00449445	0.152191	-0.000849973
3_DNTAG0031	3	YNL077W	APJ1	DNTAG0031	-0.209801	0.165065	-0.0552135	-0.365623
3_DNTAG0033	3	YDR515W	SLF1	DNTAG0033	-0.0128018	-0.0539259	-0.0747152	0.12315
3_DNTAG0034	3	YJR049C	UTR1	DNTAG0034	0.289363	0.0761716	0.358352	0.355296
3_DNTAG0035	3	YGL227W	VID30	DNTAG0035	-0.119006	0.101674	-0.0251632	-0.0376756
3_DNTAG0036	3	YDL125C	HNT1	DNTAG0036	0.0704149	0.0207166	0.0854274	-0.199091
3_DNTAG0039	3	YMR186W	HSC82	DNTAG0039	-0.636533	0.4778	-0.173572	-0.870937
3_DNTAG0041	3	YKL213C	DOA1	DNTAG0041	-0.544438	-0.0157417	-0.585054	-0.0237932
3_DNTAG0042	3	YBR173C	UMP1	DNTAG0042	-0.496114	-0.210909	-0.725897	0.579945
3_DNTAG0044	3	YHR055C	CUP1-2	DNTAG0044	0.139306	-0.0498323	0.0843011	-0.0914517
3_DNTAG0046	3	YMR038C	CCS1	DNTAG0046	0.695839	-0.129906	0.559688	-0.234941
3_DNTAG0047	3	YJL145W	SFH5	DNTAG0047	-0.00609686	-0.0316637	-0.0410451	0.135734
3_DNTAG0048	3	YLR043C	TRX1	DNTAG0048	0.193504	-0.0849517	0.102327	-0.0894764
3_DNTAG0049	3	YGR209C	TRX2	DNTAG0049	0.177981	0.0615372	0.229626	-0.0262519
3_DNTAG0051	3	YLL055W	YCT1	DNTAG0051	-0.0368157	-0.066657	-0.115586	0.150099
3_DNTAG0052	3	YKL008C	LAC1	DNTAG0052	0.126757	-0.0534324	0.0700775	0.254803
3_DNTAG0053	3	YML059C	NTE1	DNTAG0053	0.111034	-0.0515126	0.054959	0.0105371
3_DNTAG0054	3	YHR123W	EPT1	DNTAG0054	-0.45958	0.243185	-0.234967	-1.05194
3_DNTAG0055	3	YNR039C	ZRG17	DNTAG0055	-0.240354	0.25213	0.00692503	0.0312858
3_DNTAG0056	3	YBR132C	AGP2	DNTAG0056	-0.0238232	0.138191	0.115148	0.0850784
3_DNTAG0057	3	YNL291C	MID1	DNTAG0057	-0.0187757	0.421694	0.390865	-0.310433
3_DNTAG0058	3	YLR205C	HMX1	DNTAG0058	-0.126446	-0.00433489	-0.137606	0.192086
3_DNTAG0059	3	YLR242C	ARV1	DNTAG0059	0.853857	-0.437279	0.391989	0.567539
3_DNTAG0060	3	YEL065W	SIT1	DNTAG0060	-0.0478784	-0.0552372	-0.105382	0.023672
3_DNTAG0061	3	YHL040C	ARN1	DNTAG0061	-0.344626	0.350933	-0.000385895	-0.400553
3_DNTAG0063	3	YKL174C	TPO5	DNTAG0063	0.0388581	0.0641094	0.0966847	-0.222945
3_DNTAG0064	3	YOR079C	ATX2	DNTAG0064	-0.091832	0.083428	-0.0221945	-0.115776
3_DNTAG0065	3	YDR270W	CCC2	DNTAG0065	0.148966	0.113074	0.25015	-0.0834397
3_DNTAG0066	3	YJR040W	GEF1	DNTAG0066	0.177008	0.023612	0.180335	0.110678
3_DNTAG0067	3	YBR036C	CSG2	DNTAG0067	0.119591	0.0439403	0.160701	-0.0108049
3_DNTAG0068	3	YAL058W	CNE1	DNTAG0068	0.512822	-0.215913	0.279197	0.0640582
3_DNTAG0069	3	YER060W	FCY21	DNTAG0069	-0.135703	0.272543	0.130609	-0.101516
3_DNTAG0070	3	YER060W-A	FCY22	DNTAG0070	0.0834451	0.157582	0.23792	-0.0620576
3_DNTAG0071	3	YHR048W	YHK8	DNTAG0071	0.0520063	0.150661	0.185466	0.00338301
3_DNTAG0072	3	YCR075C	ERS1	DNTAG0072	-0.164913	0.168039	-0.00280095	-0.392719
3_DNTAG0073	3	YDR406W	PDR15	DNTAG0073	0.0126697	0.316369	0.323082	-0.0564449
3_DNTAG0075	3	YKR039W	GAP1	DNTAG0075	-0.0100595	-0.0118065	-0.0245255	0.0473436
3_DNTAG0076	3	YPR201W	ARR3	DNTAG0076	0.214175	-0.100602	0.11014	0.474652
3_DNTAG0077	3	YLR411W	CTR3	DNTAG0077	-0.131638	0.196976	0.0610418	-0.13374
3_DNTAG0078	3	YGL255W	ZRT1	DNTAG0078	0.0619994	-0.130869	-0.076431	0.228757
3_DNTAG0080	3	YIL121W	QDR2	DNTAG0080	-0.000883899	0.115803	0.110142	-0.140716
3_DNTAG0081	3	YPR194C	OPT2	DNTAG0081	0.033938	0.0622895	0.0895551	0.0380766
3_DNTAG0082	3	YML123C	PHO84	DNTAG0082	0.229175	0.157139	0.357401	-0.608717
3_DNTAG0084	3	YBR008C	FLR1	DNTAG0084	-0.119178	0.26041	0.136247	0.0324416
3_DNTAG0085	3	YGR055W	MUP1	DNTAG0085	-0.179214	-0.133369	-0.321965	0.0952548
3_DNTAG0086	3	YHL036W	MUP3	DNTAG0086	0.424403	-0.423444	-0.00551067	0.94333
3_DNTAG0088	3	YGL084C	GUP1	DNTAG0088	0.2593	-0.0850254	0.172198	0.111161
3_DNTAG0089	3	YBR295W	PCA1	DNTAG0089	0.414022	-0.085985	0.314775	0.415349
3_DNTAG0090	3	YKL064W	MNR2	DNTAG0090	0.159623	-0.160055	-0.0109549	0.176541
3_DNTAG0091	3	YDR497C	ITR1	DNTAG0091	-0.245827	0.0598212	-0.194328	-0.0520033
3_DNTAG0092	3	YOL103W	ITR2	DNTAG0092	0.116539	-0.0577216	0.0553783	-0.252146
3_DNTAG0094	3	YJL198W	PHO90	DNTAG0094	1.45611	-0.449127	0.997229	0.740771
3_DNTAG0096	3	YGR197C	SNG1	DNTAG0096	-0.0457156	-0.156692	-0.205874	0.169738
3_DNTAG0097	3	YIL013C	PDR11	DNTAG0097	0.321296	-0.0653741	0.251056	-0.137887
3_DNTAG0098	3	YKR103W	NFT1	DNTAG0098	0.0670083	-0.179306	-0.11838	0.2685
3_DNTAG0099	3	YKR104W	YKR104W	DNTAG0099	-0.165673	-0.022491	-0.196177	0.001314
3_DNTAG0100	3	YOL075C	YOL075C	DNTAG0100	-0.0202614	-0.0672354	-0.132328	-0.102369
3_DNTAG0101	3	YAL067C	SEO1	DNTAG0101	-0.130267	0.213517	0.0532482	0.00607392
3_DNTAG0102	3	YCL073C	GEX1	DNTAG0102	-0.0235992	0.0310123	0.00546379	0.107495
3_DNTAG0103	3	YKR106W	GEX2	DNTAG0103	-0.321166	0.594607	0.254868	-0.723209
3_DNTAG0104	3	YOR071C	NRT1	DNTAG0104	-0.018189	-0.0595328	-0.0831046	0.0571949
3_DNTAG0105	3	YOR192C	THI72	DNTAG0105	0.0139513	0.0477815	0.0524092	0.116799
3_DNTAG0106	3	YDL054C	MCH1	DNTAG0106	-0.0833317	-0.256731	-0.382901	0.240703
3_DNTAG0107	3	YKL221W	MCH2	DNTAG0107	-0.123125	0.211704	0.0931098	-0.127856
3_DNTAG0108	3	YOR306C	MCH5	DNTAG0108	0.0247723	-0.189096	-0.170055	0.0215148
3_DNTAG0109	3	YJL036W	SNX4	DNTAG0109	-0.469092	0.0426994	-0.430345	0.179483
3_DNTAG0110	3	YBR298C	MAL31	DNTAG0110	0.00473654	0.188806	0.200318	0.0250028
3_DNTAG0111	3	YGR289C	MAL11	DNTAG0111	0.0231036	-0.141872	-0.131531	0.311463
3_DNTAG0112	3	YLR220W	CCC1	DNTAG0112	-0.0379808	-0.0344883	-0.0788702	0.0742679
3_DNTAG0113	3	YAL022C	FUN26	DNTAG0113	0.356798	-0.339429	0.00541962	0.717508
3_DNTAG0114	3	YPR037C	ERV2	DNTAG0114	-0.0889927	0.234123	0.139311	-0.0424955
3_DNTAG0116	3	YJR095W	SFC1	DNTAG0116	0.0936839	-0.125587	-0.0418505	-0.18083
3_DNTAG0118	3	YPR021C	AGC1	DNTAG0118	0.367625	-0.0547181	0.302425	-0.451527
3_DNTAG0119	3	YBR291C	CTP1	DNTAG0119	-0.155838	0.0831646	-0.078243	-0.0365643
3_DNTAG0120	3	YER154W	OXA1	DNTAG0120	0.222446	-0.105256	0.113458	0.207015
3_DNTAG0121	3	YPL060W	MFM1	DNTAG0121	0.165428	-0.377202	-0.21741	0.0587429
3_DNTAG0122	3	YOR334W	MRS2	DNTAG0122	-0.0804572	-0.0447596	-0.13261	0.0423993
3_DNTAG0123	3	YOR222W	ODC2	DNTAG0123	-0.102105	0.166346	0.0600482	-0.0289614
3_DNTAG0124	3	YLR188W	MDL1	DNTAG0124	-0.202494	0.0287502	-0.182102	0.0506196
3_DNTAG0125	3	YKL120W	OAC1	DNTAG0125	-0.15339	0.0870088	-0.0746252	-0.0829015
3_DNTAG0126	3	YDL119C	HEM25	DNTAG0126	0.15476	-0.0856303	0.0606846	0.00454571
3_DNTAG0127	3	YEL006W	YEA6	DNTAG0127	-0.0564756	-0.0673641	-0.126193	0.162775
3_DNTAG0129	3	YPR058W	YMC1	DNTAG0129	0.0555157	0.216988	0.265629	-0.39108
3_DNTAG0130	3	YBR104W	YMC2	DNTAG0130	-0.153416	-0.141505	-0.30503	0.0900607
3_DNTAG0131	3	YMR166C	MME1	DNTAG0131	0.292151	-0.378421	-0.140791	0.313806
3_DNTAG0132	3	YPR011C	YPR011C	DNTAG0132	-0.0581222	0.00975271	-0.0527957	0.0159722
3_DNTAG0133	3	YNL083W	SAL1	DNTAG0133	0.0268307	0.00409683	0.0223879	0.0510179
3_DNTAG0134	3	YIL006W	YIA6	DNTAG0134	0.0743145	0.0572818	0.125517	-0.176451
3_DNTAG0135	3	YMR241W	YHM2	DNTAG0135	0.128075	-0.185841	-0.0665132	0.409504
3_DNTAG0136	3	YGR096W	TPC1	DNTAG0136	-0.183877	0.219276	8.86016e-06	-0.134506
3_DNTAG0137	3	YPR067W	ISA2	DNTAG0137	0.2657	0.161942	0.414927	0.0776509
3_DNTAG0138	3	YJR135W-A	TIM8	DNTAG0138	-0.184084	-0.06109	-0.247745	0.410476
3_DNTAG0139	3	YGR181W	TIM13	DNTAG0139	0.155125	0.0402554	0.189901	-0.037594
3_DNTAG0141	3	YKL040C	NFU1	DNTAG0141	-0.247409	0.0957924	-0.157209	0.0658286
3_DNTAG0142	3	YOR226C	ISU2	DNTAG0142	0.0807156	0.0175415	0.0921235	-0.0905678
3_DNTAG0143	3	YLL027W	ISA1	DNTAG0143	-0.10224	-0.0209713	-0.128454	-0.0598714
3_DNTAG0144	3	YFL036W	RPO41	DNTAG0144	0.0939227	-0.232066	-0.172519	0.552372
3_DNTAG0146	3	YLR348C	DIC1	DNTAG0146	-0.230837	0.16033	-0.0811532	-0.274559
3_DNTAG0147	3	YJL112W	MDV1	DNTAG0147	-0.0631379	0.0498727	-0.0235303	0.0285973
3_DNTAG0148	3	YGR028W	MSP1	DNTAG0148	0.272905	0.00151891	0.249842	-0.021173
3_DNTAG0149	3	YDR470C	UGO1	DNTAG0149	0.326262	-0.070611	0.25997	0.59423
3_DNTAG0151	3	YOR045W	TOM6	DNTAG0151	0.110895	-0.0619613	0.0408366	0.202562
3_DNTAG0152	3	YNL070W	TOM7	DNTAG0152	0.0111194	-0.0187554	-0.0218227	-0.0443143
3_DNTAG0153	3	YNL121C	TOM70	DNTAG0153	-0.0287333	-0.0234111	-0.0529941	0.110354
3_DNTAG0154	3	YIL134W	FLX1	DNTAG0154	-0.00456155	0.0258729	-0.0180444	0.182255
3_DNTAG0155	3	YKL134C	OCT1	DNTAG0155	0.231155	-0.477713	-0.26513	1.19903
3_DNTAG0156	3	YOR037W	CYC2	DNTAG0156	-0.0776898	-0.0486608	-0.133479	0.194767
3_DNTAG0157	3	YER053C	PIC2	DNTAG0157	-0.0224682	0.0441178	0.0142363	0.0263593
3_DNTAG0158	3	YDR046C	BAP3	DNTAG0158	0.0679907	0.0311694	0.0948744	-0.0405553
3_DNTAG0162	3	YNL318C	HXT14	DNTAG0162	-0.283194	0.232342	-0.056777	-0.182481
3_DNTAG0163	3	YFL011W	HXT10	DNTAG0163	-0.0502992	-0.0927074	-0.155175	-0.0722133
3_DNTAG0165	3	YDR342C	HXT7	DNTAG0165	-0.0895325	0.0779758	-0.0154408	-0.0557333
3_DNTAG0166	3	YIL114C	POR2	DNTAG0166	-0.105926	0.0720526	-0.035807	-0.0562629
3_DNTAG0167	3	YMR177W	MMT1	DNTAG0167	0.136237	-0.207605	-0.0778603	0.121797
3_DNTAG0168	3	YPL224C	MMT2	DNTAG0168	-0.0832299	0.0424022	-0.0498694	-0.0198271
3_DNTAG0169	3	YPL135W	ISU1	DNTAG0169	0.000647986	0.0773734	0.0723508	0.0403786
3_DNTAG0170	3	YKL217W	JEN1	DNTAG0170	0.120931	-0.104863	-0.00512044	-0.059217
3_DNTAG0171	3	YOR317W	FAA1	DNTAG0171	0.131183	-0.137682	-0.0144832	0.0337089
3_DNTAG0172	3	YER015W	FAA2	DNTAG0172	-0.0904157	0.107216	0.0119112	-0.0133082
3_DNTAG0173	3	YHR050W	SMF2	DNTAG0173	0.0564531	0.0866772	0.125212	-0.163758
3_DNTAG0174	3	YPL134C	ODC1	DNTAG0174	-0.0778036	0.0566331	-0.0276615	-0.0152252
3_DNTAG0175	3	YJL094C	KHA1	DNTAG0175	-0.0441871	0.0626154	0.0119187	0.087215
3_DNTAG0176	3	YGR260W	TNA1	DNTAG0176	-0.0876086	0.323953	0.213801	-0.0800617
3_DNTAG0177	3	YDR256C	CTA1	DNTAG0177	0.173869	-0.157248	0.000300084	0.0758363
3_DNTAG0178	3	YJR077C	MIR1	DNTAG0178	-0.0348153	-0.0522883	-0.0967627	0.241914
3_DNTAG0180	3	YEL030W	ECM10	DNTAG0180	-0.103804	0.15159	0.0407752	0.0677448
3_DNTAG0182	3	YDR011W	SNQ2	DNTAG0182	-0.0398627	-0.0287382	-0.14012	0.0759198
3_DNTAG0185	3	YOR011W	AUS1	DNTAG0185	-0.0560031	0.138747	0.068454	0.100545
3_DNTAG0186	3	YNR070W	PDR18	DNTAG0186	0.0823331	0.00815165	0.0845295	0.0428691
3_DNTAG0187	3	YNR055C	HOL1	DNTAG0187	0.0285367	-0.219584	-0.196723	0.0938831
3_DNTAG0188	3	YNL125C	ESBP6	DNTAG0188	0.11958	-0.105674	0.00848882	-0.227148
3_DNTAG0190	3	YNR002C	ATO2	DNTAG0190	-0.0442474	0.0442354	-0.0108098	0.275472
3_DNTAG0192	3	YGR257C	MTM1	DNTAG0192	0.0956666	-0.103672	-0.0168419	0.51835
3_DNTAG0193	3	YOR316C	COT1	DNTAG0193	0.278279	-0.169865	0.091742	0.326949
3_DNTAG0194	3	YOR197W	MCA1	DNTAG0194	0.00626654	-0.0167385	-0.016421	0.156782
3_DNTAG0195	3	YER048C	CAJ1	DNTAG0195	-0.0135802	0.0826542	0.0600766	-0.171033
3_DNTAG0196	3	YHR127W	YHR127W	DNTAG0196	-0.157624	0.102387	-0.0610077	-0.0206161
3_DNTAG0197	3	YDR205W	MSC2	DNTAG0197	0.0237688	-0.194126	-0.177796	0.035247
3_DNTAG0198	3	YCL025C	AGP1	DNTAG0198	-0.116476	0.0934985	-0.024198	-0.00263546
3_DNTAG0199	3	YFL055W	AGP3	DNTAG0199	0.213186	0.0835725	0.286459	0.535957
[truncated: 2,272 more rows]

## Sheet: UpTag_screen1
	Plate	ORF	Gene	TAG	K79me3_over_K79me1	K79me1_over_H3	K79me3_over_H3	H3_over_input
1_UPTAG0001	1	YOR094W	ARF3	UPTAG0001	1.25128	0.913153	1.12107	1.21558
1_UPTAG0002	1	YKL051W	SFK1	UPTAG0002	0.943547	0.926506	0.857722	1.0493
1_UPTAG0003	1	YDL161W	ENT1	UPTAG0003	1.21977	0.755121	0.903712	1.23305
1_UPTAG0004	1	YLR206W	ENT2	UPTAG0004	0.883131	1.03683	0.898398	0.955567
1_UPTAG0005	1	YLL038C	ENT4	UPTAG0005	1.13342	0.964963	1.07309	0.974188
1_UPTAG0006	1	YHR016C	YSC84	UPTAG0006	0.501912	2.73161	1.34518	0.523835
1_UPTAG0007	1	YJR125C	ENT3	UPTAG0007	1.16426	0.692644	0.791217	1.07953
1_UPTAG0008	1	YNL293W	MSB3	UPTAG0008	1.0547	0.850388	0.879996	1.13831
1_UPTAG0009	1	YCL034W	LSB5	UPTAG0009	1.17706	1.76606	2.03957	0.632756
1_UPTAG0010	1	YBR128C	ATG14	UPTAG0010	0.980054	1.05928	1.01858	0.955404
1_UPTAG0011	1	YMR159C	ATG16	UPTAG0011	0.902899	1.20936	1.07135	0.975018
1_UPTAG0012	1	YPL100W	ATG21	UPTAG0012	1.11297	0.791035	0.863806	1.08377
1_UPTAG0013	1	YCR068W	ATG15	UPTAG0013	1.22022	0.860663	1.0304	1.00976
1_UPTAG0014	1	YOL007C	CSI2	UPTAG0014	1.35144	0.791847	1.04996	1.15238
1_UPTAG0015	1	YER150W	SPI1	UPTAG0015	0.7743	1.30644	0.992506	0.848181
1_UPTAG0016	1	YIR039C	YPS6	UPTAG0016	0.896058	0.800495	0.703769	1.04204
1_UPTAG0017	1	YOR034C	AKR2	UPTAG0017	0.787151	1.02007	0.78781	1.12522
1_UPTAG0018	1	YHR057C	CPR2	UPTAG0018	0.851532	0.977683	0.816835	0.967373
1_UPTAG0019	1	YLR361C	DCR2	UPTAG0019	0.980943	0.864905	0.832429	1.04524
1_UPTAG0020	1	YER039C	HVG1	UPTAG0020	0.840107	0.954366	0.786656	1.02019
1_UPTAG0021	1	YJL223C	PAU1	UPTAG0021	0.765849	0.886451	0.666091	0.944698
1_UPTAG0022	1	YEL049W	PAU2	UPTAG0022	1.01162	0.993122	0.98572	1.14281
1_UPTAG0023	1	YCR104W	PAU3	UPTAG0023	0.741731	0.947545	0.689575	1.02779
1_UPTAG0024	1	YLR461W	PAU4	UPTAG0024	1.03389	1.00272	1.01716	0.98807
1_UPTAG0025	1	YFL020C	PAU5	UPTAG0025	0.841389	0.82746	0.683092	0.981706
1_UPTAG0026	1	YNR076W	PAU6	UPTAG0026	1.00869	0.813255	0.804856	1.03359
1_UPTAG0027	1	YKR098C	UBP11	UPTAG0027
1_UPTAG0028	1	YDL206W	YDL206W	UPTAG0028	1.09104	0.77318	0.827669	1.15715
1_UPTAG0029	1	YFL040W	YFL040W	UPTAG0029	0.873722	1.08631	0.93124	1.04297
1_UPTAG0030	1	YFR018C	YFR018C	UPTAG0030	1.04688	0.822916	0.845258	1.14556
1_UPTAG0031	1	YGL081W	YGL081W	UPTAG0031	0.77933	1.28926	0.985817	0.985732
1_UPTAG0032	1	YLR057W	MNL2	UPTAG0032	1.07346	0.953599	1.00435	1.05814
1_UPTAG0033	1	YNR071C	YNR071C	UPTAG0033	1.04234	0.832705	0.851603	1.05648
1_UPTAG0034	1	YPR084W	YPR084W	UPTAG0034	0.709868	1.28032	0.891723	1.05305
1_UPTAG0035	1	YGL259W	YPS5	UPTAG0035	1.26492	0.914624	1.13512	0.948043
1_UPTAG0036	1	YMR237W	BCH1	UPTAG0036	0.955242	1.00622	0.943061	1.0564
1_UPTAG0037	1	YGL083W	SCY1	UPTAG0037	0.971876	1.09817	1.04716	1.00345
1_UPTAG0038	1	YMR071C	TVP18	UPTAG0038	0.970894	0.849108	0.808854	1.00548
1_UPTAG0039	1	YBL010C	YBL010C	UPTAG0039	1.02471	0.826034	0.830487	1.14971
1_UPTAG0040	1	YEL048C	TCA17	UPTAG0040	1.31712	0.832478	1.07581	0.99429
1_UPTAG0041	1	YHL017W	YHL017W	UPTAG0041	1.34225	0.750521	0.988395	1.06481
1_UPTAG0042	1	YJL207C	LAA1	UPTAG0042	1.1558	1.09544	1.24224	0.978671
1_UPTAG0045	1	YDR100W	TVP15	UPTAG0045	1.52047	0.82799	1.2352	1.15298
1_UPTAG0046	1	YER101C	AST2	UPTAG0046	0.873335	1.00239	0.858922	1.07341
1_UPTAG0047	1	YDR371W	CTS2	UPTAG0047	0.977592	1.14252	1.09586	0.989917
1_UPTAG0048	1	YDR084C	TVP23	UPTAG0048	1.21895	1.04925	1.25487	1.04789
1_UPTAG0049	1	YKR088C	TVP38	UPTAG0049	1.03195	0.959669	0.971658	1.12643
1_UPTAG0050	1	YEL005C	VAB2	UPTAG0050	1.21823	0.732453	0.875477	1.23655
1_UPTAG0051	1	YBL104C	SEA4	UPTAG0051	1.08579	0.860339	0.916539	1.19696
1_UPTAG0052	1	YIR035C	YIR035C	UPTAG0052	1.06812	0.838637	0.87888	1.06109
1_UPTAG0054	1	YCR082W	AHC2	UPTAG0054	1.0233	0.951947	0.955766	0.992645
1_UPTAG0055	1	YDR304C	CPR5	UPTAG0055	0.765358	1.06691	0.801176	1.13292
1_UPTAG0056	1	YML101C	CUE4	UPTAG0056	0.928707	0.94326	0.859499	1.0524
1_UPTAG0057	1	YGR223C	HSV2	UPTAG0057	1.15652	1.01552	1.15233	1.16834
1_UPTAG0058	1	YLR351C	NIT3	UPTAG0058	0.821234	1.01296	0.816194	1.01548
1_UPTAG0059	1	YJL123C	MTC1	UPTAG0059	1.14565	0.994187	1.11752	1.07208
1_UPTAG0060	1	YJR015W	YJR015W	UPTAG0060
1_UPTAG0061	1	YPL105C	SYH1	UPTAG0061	1.01133	1.05487	1.04671	1.14394
1_UPTAG0062	1	YDR349C	YPS7	UPTAG0062	1.08146	0.80211	0.851095	1.00909
1_UPTAG0063	1	YDR411C	DFM1	UPTAG0063
1_UPTAG0064	1	YFR041C	ERJ5	UPTAG0064	1.11987	0.79879	0.877681	1.15488
1_UPTAG0065	1	YJR118C	ILM1	UPTAG0065	1.31218	0.728507	0.937914	1.2479
1_UPTAG0067	1	YNL156C	NSG2	UPTAG0067	0.956054	0.866707	0.812999	1.04818
1_UPTAG0068	1	YMR123W	PKR1	UPTAG0068	1.35624	1.0382	1.3815	0.803058
1_UPTAG0069	1	YDL204W	RTN2	UPTAG0069	0.973497	0.917799	0.876632	0.940657
1_UPTAG0070	1	YHR181W	SVP26	UPTAG0070	0.839644	1.07928	0.889129	0.961893
1_UPTAG0071	1	YBR273C	UBX7	UPTAG0071	0.86303	0.726967	0.615568	1.09034
1_UPTAG0072	1	YBR096W	YBR096W	UPTAG0072
1_UPTAG0075	1	YDR221W	GTB1	UPTAG0075	1.47762	0.756357	1.09654	1.10533
1_UPTAG0077	1	YDR476C	YDR476C	UPTAG0077	0.825422	0.828818	0.671229	1.08815
1_UPTAG0078	1	YEL001C	IRC22	UPTAG0078	1.05489	0.821947	0.850715	1.1658
1_UPTAG0079	1	YEL043W	YEL043W	UPTAG0079	0.813812	0.778573	0.621668	1.31566
1_UPTAG0080	1	YER053C-A	YER053C-A	UPTAG0080	1.04423	1.03193	1.05726	0.790586
1_UPTAG0081	1	YKL065C	YET1	UPTAG0081	0.894426	0.959476	0.842004	1.05154
1_UPTAG0083	1	YGL010W	MPO1	UPTAG0083	0.936207	1.03624	0.951843	1.03239
1_UPTAG0084	1	YGL231C	EMC4	UPTAG0084	1.07044	1.27995	1.34429	0.97163
1_UPTAG0085	1	YGR263C	SAY1	UPTAG0085	0.915338	0.806482	0.724288	1.05429
1_UPTAG0086	1	YHR045W	YHR045W	UPTAG0086	1.14309	1.36145	1.52692	0.900499
1_UPTAG0087	1	YIL039W	TED1	UPTAG0087	1.20924	0.969249	1.14996	0.992218
1_UPTAG0088	1	YJR088C	EMC2	UPTAG0088	0.937972	0.980637	0.902471	0.841605
1_UPTAG0089	1	YLL014W	EMC6	UPTAG0089	1.16394	0.831024	0.949026	1.14039
1_UPTAG0090	1	YLL023C	POM33	UPTAG0090	0.86378	0.97076	0.822717	1.20899
1_UPTAG0091	1	YLR050C	YLR050C	UPTAG0091	1.21208	0.796283	0.946963	1.1913
1_UPTAG0092	1	YLR064W	PER33	UPTAG0092	1.07127	0.781641	0.821563	1.32639
1_UPTAG0093	1	YNL046W	YNL046W	UPTAG0093	1.30869	0.96401	1.23781	1.11073
1_UPTAG0094	1	YNL146W	YNL146W	UPTAG0094	0.94361	1.02689	0.950714	1.11336
1_UPTAG0095	1	YNR021W	YNR021W	UPTAG0095	0.971552	1.51047	1.43984	0.926708
1_UPTAG0096	1	YOR044W	IRC23	UPTAG0096	0.869847	1.2499	1.06673	0.924858
1_UPTAG0098	1	YPL207W	TYW1	UPTAG0098	0.901817	1.03092	0.912173	0.965893
1_UPTAG0099	1	YPR003C	YPR003C	UPTAG0099	0.91511	1.32676	1.19124	0.959039
1_UPTAG0100	1	YPR063C	YPR063C	UPTAG0100	0.977333	1.19283	1.14382	0.942107
1_UPTAG0101	1	YPR091C	NVJ2	UPTAG0101	0.970048	1.024	0.974604	1.06672
1_UPTAG0102	1	YPR114W	YPR114W	UPTAG0102	0.860807	1.24863	1.05457	0.953548
1_UPTAG0103	1	YBR287W	YBR287W	UPTAG0103	0.854637	0.889759	0.746087	1.06382
1_UPTAG0104	1	YDR519W	FPR2	UPTAG0104	1.08669	0.918474	0.979285	0.89991
1_UPTAG0105	1	YDR056C	EMC10	UPTAG0105	1.14916	1.2015	1.35469	1.05379
1_UPTAG0106	1	YGL079W	KXD1	UPTAG0106	1.02259	0.893322	0.896284	1.07031
1_UPTAG0107	1	YGR206W	MVB12	UPTAG0107	0.853354	0.92286	0.772682	1.01904
1_UPTAG0108	1	YKL061W	BLI1	UPTAG0108	1.20092	1.18994	1.40209	0.942755
1_UPTAG0109	1	YLR073C	RFU1	UPTAG0109	0.946108	0.926548	0.86009	0.968711
1_UPTAG0110	1	YLR408C	BLS1	UPTAG0110	1.29085	0.837014	1.0601	0.822692
1_UPTAG0111	1	YMR171C	EAR1	UPTAG0111	1.0272	0.893678	0.900681	1.14539
1_UPTAG0112	1	YNL086W	SNN1	UPTAG0112	0.939304	0.987689	0.910252	0.991657
1_UPTAG0113	1	YHR105W	YPT35	UPTAG0113	0.880966	1.1284	0.975347	0.940961
1_UPTAG0115	1	YKL063C	YKL063C	UPTAG0115	0.758719	1.13128	0.842142	0.94991
1_UPTAG0116	1	YPL246C	RBD2	UPTAG0116	0.962034	0.939962	0.887229	1.01619
1_UPTAG0117	1	YJR134C	SGM1	UPTAG0117	0.894355	0.935788	0.821151	1.05057
1_UPTAG0118	1	YER113C	TMN3	UPTAG0118	0.98593	0.920284	0.890233	1.02532
1_UPTAG0119	1	YOL107W	YOL107W	UPTAG0119	1.25692	0.962073	1.18645	0.805076
1_UPTAG0121	1	YOR311C	DGK1	UPTAG0121	1.09477	0.940531	1.01026	1.01262
1_UPTAG0122	1	YDR275W	BSC2	UPTAG0122	0.995265	1.12824	1.10173	0.875091
1_UPTAG0123	1	YCR069W	CPR4	UPTAG0123	1.12767	0.867429	0.959736	0.894959
1_UPTAG0124	1	YDR107C	TMN2	UPTAG0124	0.857345	1.02514	0.862328	1.05487
1_UPTAG0125	1	YER170W	ADK2	UPTAG0125	1.19396	0.911911	1.06826	1.14469
1_UPTAG0126	1	YKR027W	BCH2	UPTAG0126	1.1716	0.837798	0.963065	1.15815
1_UPTAG0127	1	YDR033W	MRH1	UPTAG0127	0.904082	1.15383	1.02349	1.16114
1_UPTAG0128	1	YER049W	TPA1	UPTAG0128	0.766413	0.9976	0.750161	1.14552
1_UPTAG0129	1	YLR151C	PCD1	UPTAG0129	0.814319	1.16123	0.927787	1.00994
1_UPTAG0130	1	YMR204C	INP1	UPTAG0130	0.960874	0.851443	0.802707	1.02822
1_UPTAG0131	1	YOL019W	YOL019W	UPTAG0131	0.846565	1.00995	0.838871	1.01982
1_UPTAG0132	1	YKR007W	MEH1	UPTAG0132	1.59401	0.949561	1.48508	1.32128
1_UPTAG0133	1	YDR119W	VBA4	UPTAG0133	1.07809	0.872626	0.923035	1.03162
1_UPTAG0134	1	YDR352W	YPQ2	UPTAG0134	0.988059	0.854308	0.828195	1.07389
1_UPTAG0135	1	YNR028W	CPR8	UPTAG0135	0.835963	0.833147	0.683351	1.11054
1_UPTAG0137	1	YDL010W	GRX6	UPTAG0137	1.03106	0.803114	0.81245	1.11457
1_UPTAG0138	1	YHL008C	YHL008C	UPTAG0138	1.01549	1.24349	1.23894	1.00592
1_UPTAG0139	1	YBR014C	GRX7	UPTAG0139	0.846834	0.962516	0.799726	0.990782
1_UPTAG0140	1	YER014C-A	BUD25	UPTAG0140	2.81749	0.91559	2.53104	1.18741
1_UPTAG0141	1	YOR299W	BUD7	UPTAG0141	1.09132	0.936425	1.00267	1.06997
1_UPTAG0143	1	YDR006C	SOK1	UPTAG0143	0.777022	1.02876	0.784303	1.08726
1_UPTAG0144	1	YNL323W	LEM3	UPTAG0144	1.19985	0.927779	1.09221	0.898769
1_UPTAG0146	1	YBL101C	ECM21	UPTAG0146	0.97236	0.972228	0.927535	0.938001
1_UPTAG0147	1	YOR092W	ECM3	UPTAG0147	0.963615	0.895379	0.846536	1.10806
1_UPTAG0148	1	YER083C	GET2	UPTAG0148	0.865216	1.10645	0.939274	0.842056
1_UPTAG0149	1	YIL002C	INP51	UPTAG0149	0.954042	1.02285	0.95745	1.03958
1_UPTAG0151	1	YOR109W	INP53	UPTAG0151	1.00856	0.969062	0.958936	1.03569
1_UPTAG0153	1	YMR140W	SIP5	UPTAG0153	0.82802	1.05101	0.853849	0.997514
1_UPTAG0154	1	YJR060W	CBF1	UPTAG0154	1.31241	0.913807	1.17668	1.01436
1_UPTAG0155	1	YER120W	SCS2	UPTAG0155	1.18509	0.857645	0.997224	1.16542
1_UPTAG0156	1	YGL053W	PRM8	UPTAG0156	1.05584	0.87811	0.909668	1.12998
1_UPTAG0157	1	YBR283C	SSH1	UPTAG0157	0.921111	0.878469	0.793914	1.09358
1_UPTAG0158	1	YER019C-A	SBH2	UPTAG0158	0.955162	0.851057	0.797574	0.994773
1_UPTAG0162	1	YHR161C	YAP1801	UPTAG0162	0.974709	0.88462	0.845994	1.06648
1_UPTAG0163	1	YGR241C	YAP1802	UPTAG0163	0.887101	1.52699	1.32906	0.880527
1_UPTAG0165	1	YNR075W	COS10	UPTAG0165	1.11345	0.797828	0.871598	1.03498
1_UPTAG0166	1	YNL227C	JJJ1	UPTAG0166	1.32571	0.786797	1.0234	1.16272
1_UPTAG0167	1	YPL032C	SVL3	UPTAG0167	0.917419	1.07236	0.965256	0.980397
1_UPTAG0168	1	YDL231C	BRE4	UPTAG0168	0.843445	1.0316	0.853692	0.963546
1_UPTAG0171	1	YDR388W	RVS167	UPTAG0171	1.09444	1.85584	1.99281	0.921923
1_UPTAG0172	1	YCR009C	RVS161	UPTAG0172	0.972898	1.1331	1.08161	0.994287
1_UPTAG0173	1	YCR053W	THR4	UPTAG0173	0.879575	1.2187	1.05173	0.899897
1_UPTAG0174	1	YDR264C	AKR1	UPTAG0174	3.6283	0.467901	1.66568	1.17609
1_UPTAG0175	1	YDR036C	EHD3	UPTAG0175	0.92006	1.11296	1.00469	1.00221
1_UPTAG0176	1	YDR069C	DOA4	UPTAG0176	0.860001	1.22953	1.03746	0.99083
1_UPTAG0178	1	YAL030W	SNC1	UPTAG0178	0.855608	1.09182	0.916564	0.908325
1_UPTAG0179	1	YOR327C	SNC2	UPTAG0179	0.780243	1.03317	0.790931	0.999261
1_UPTAG0180	1	YBR207W	FTH1	UPTAG0180	0.883602	1.08504	0.940669	1.01415
1_UPTAG0181	1	YIL090W	ICE2	UPTAG0181	1.09457	0.932789	1.00176	0.984362
1_UPTAG0182	1	YDR320C	SWA2	UPTAG0182	1.21479	0.991696	1.182	1.30351
1_UPTAG0183	1	YNL049C	SFB2	UPTAG0183	0.800301	1.10485	0.867547	0.96723
1_UPTAG0184	1	YAL007C	ERP2	UPTAG0184	0.974963	1.07728	1.03051	0.943742
1_UPTAG0185	1	YML012W	ERV25	UPTAG0185	0.751569	1.00346	0.739953	1.06877
1_UPTAG0186	1	YGR284C	ERV29	UPTAG0186	1.14898	0.83037	0.936097	0.964408
1_UPTAG0187	1	YNL044W	YIP3	UPTAG0187	0.903787	1.01674	0.901599	0.997463
1_UPTAG0188	1	YCR067C	SED4	UPTAG0188	1.0977	0.963661	1.03787	0.949657
1_UPTAG0189	1	YOR307C	SLY41	UPTAG0189	2.56584	0.689427	1.73562	0.807933
1_UPTAG0190	1	YDR057W	YOS9	UPTAG0190	0.860302	1.11093	0.93772	1.06483
1_UPTAG0191	1	YHR098C	SFB3	UPTAG0191	1.91059	0.96275	1.80475	1.12409
1_UPTAG0192	1	YJL192C	SOP4	UPTAG0192	1.40065	1.02063	1.4026	0.859609
1_UPTAG0193	1	YOR216C	RUD3	UPTAG0193	1.04506	1.34203	1.37607	0.886391
1_UPTAG0194	1	YFL048C	EMP47	UPTAG0194	0.851394	1.11887	0.934639	1.08045
1_UPTAG0195	1	YLR080W	EMP46	UPTAG0195	0.886656	1.52486	1.32654	0.852539
1_UPTAG0196	1	YML067C	ERV41	UPTAG0196	0.853319	1.12716	0.943692	1.07978
1_UPTAG0197	1	YAL042W	ERV46	UPTAG0197	1.22491	1.31308	1.57808	0.896661
1_UPTAG0198	1	YAR002C-A	ERP1	UPTAG0198	1.02522	1.03346	1.03954	0.992553
1_UPTAG0199	1	YGR166W	TRS65	UPTAG0199	0.985027	1.07078	1.03487	1.06803
1_UPTAG0200	1	YOR115C	TRS33	UPTAG0200	0.922159	1.10775	1.00226	1.00633
1_UPTAG0201	1	YIL044C	AGE2	UPTAG0201	0.908093	0.811149	0.722714	0.987527
1_UPTAG0202	1	YIL076W	SEC28	UPTAG0202	0.844368	0.817961	0.677641	1.26839
1_UPTAG0203	1	YCL001W	RER1	UPTAG0203	0.940709	1.05127	0.9703	0.931489
1_UPTAG0204	1	YDR524C	AGE1	UPTAG0204	2.32726	0.640144	1.4617	1.23878
1_UPTAG0205	1	YDL226C	GCS1	UPTAG0205
1_UPTAG0206	1	YDL192W	ARF1	UPTAG0206	1.29108	1.04812	1.3277	1.1105
1_UPTAG0207	1	YDL137W	ARF2	UPTAG0207	0.743809	0.895374	0.653433	1.08881
1_UPTAG0208	1	YHR142W	CHS7	UPTAG0208	1.09106	1.09601	1.17326	0.943656
1_UPTAG0209	1	YGL054C	ERV14	UPTAG0209	1.13241	0.999908	1.11096	0.761688
1_UPTAG0210	1	YGL200C	EMP24	UPTAG0210	0.929056	0.843991	0.769334	1.02161
1_UPTAG0211	1	YLR268W	SEC22	UPTAG0211	0.872892	1.54623	1.32425	0.926456
1_UPTAG0212	1	YER122C	GLO3	UPTAG0212	1.18553	0.952057	1.10742	0.906582
1_UPTAG0213	1	YMR292W	GOT1	UPTAG0213	0.870858	1.14332	0.976898	1.02708
1_UPTAG0214	1	YJR031C	GEA1	UPTAG0214	1.08307	1.06332	1.12994	1.00003
1_UPTAG0216	1	YDR108W	TRS85	UPTAG0216	0.93316	1.06256	0.972851	0.924824
1_UPTAG0217	1	YLR207W	HRD3	UPTAG0217	0.947891	1.2386	1.15193	1.00249
1_UPTAG0218	1	YHR204W	MNL1	UPTAG0218	0.937773	1.0478	0.964073	0.902749
1_UPTAG0219	1	YBR201W	DER1	UPTAG0219	0.754815	0.957143	0.708847	1.11825
1_UPTAG0222	1	YNL064C	YDJ1	UPTAG0222	1.38104	0.765839	1.03772	1.12245
1_UPTAG0223	1	YFL025C	BST1	UPTAG0223	0.978619	1.20472	1.15674	0.9227
1_UPTAG0224	1	YMR264W	CUE1	UPTAG0224	1.12216	1.148	1.26395	1.00897
1_UPTAG0225	1	YKL079W	SMY1	UPTAG0225	0.781348	0.971907	0.745083	0.995157
1_UPTAG0226	1	YOL065C	INP54	UPTAG0226	0.902909	0.877805	0.777638	1.05231
1_UPTAG0227	1	YDR122W	KIN1	UPTAG0227	1.0898	0.859864	0.919413	1.02254
1_UPTAG0228	1	YLR096W	KIN2	UPTAG0228	0.940906	0.865009	0.79855	1.03418
1_UPTAG0229	1	YPR032W	SRO7	UPTAG0229	1.03555	1.15855	1.17712	0.982928
1_UPTAG0230	1	YBL106C	SRO77	UPTAG0230	0.985294	1.04099	1.00635	0.937647
1_UPTAG0231	1	YOR049C	RSB1	UPTAG0231	1.24018	1.68637	2.05198	0.661664
1_UPTAG0232	1	YPL147W	PXA1	UPTAG0232	1.00489	0.868927	0.85672	1.06364
1_UPTAG0233	1	YKL188C	PXA2	UPTAG0233	1.05664	0.961562	0.996871	0.999781
1_UPTAG0234	1	YBR264C	YPT10	UPTAG0234	0.76562	1.0961	0.823378	0.91982
1_UPTAG0235	1	YDR153C	ENT5	UPTAG0235	0.998146	1.23407	1.20856	0.974822
1_UPTAG0236	1	YBL102W	SFT2	UPTAG0236	0.840809	1.08155	0.892231	0.988723
1_UPTAG0237	1	YJL004C	SYS1	UPTAG0237	1.26837	0.960525	1.19533	1.0005
1_UPTAG0238	1	YJL099W	CHS6	UPTAG0238	0.794778	0.959749	0.748409	1.03674
1_UPTAG0239	1	YPL195W	APL5	UPTAG0239	1.1717	0.938275	1.07866	0.873263
1_UPTAG0240	1	YGR261C	APL6	UPTAG0240	1.10681	0.770549	0.836773	1.10244
1_UPTAG0241	1	YBR288C	APM3	UPTAG0241	1.28258	0.876034	1.1024	0.993101
1_UPTAG0242	1	YJL024C	APS3	UPTAG0242	0.949256	1.44141	1.34247	0.690415
1_UPTAG0243	1	YJL222W	VTH2	UPTAG0243	0.758103	1.09734	0.816219	0.935358
1_UPTAG0245	1	YOR036W	PEP12	UPTAG0245	0.542118	2.4516	1.304	0.706795
1_UPTAG0246	1	YDR358W	GGA1	UPTAG0246	0.722303	0.983904	0.697281	1.04701
1_UPTAG0247	1	YHR108W	GGA2	UPTAG0247	1.00071	1.18782	1.16626	0.934254
1_UPTAG0248	1	YJL029C	VPS53	UPTAG0248	1.45118	0.934676	1.33081	1.21664
1_UPTAG0249	1	YDR484W	VPS52	UPTAG0249	0.723848	1.06452	0.756026	0.890768
1_UPTAG0250	1	YDR027C	VPS54	UPTAG0250	0.969993	1.1709	1.11436	1.12118
1_UPTAG0251	1	YKL179C	COY1	UPTAG0251	1.08216	0.949725	1.00838	1.13181
1_UPTAG0252	1	YOL062C	APM4	UPTAG0252	0.894977	1.17256	1.02963	0.886117
1_UPTAG0253	1	YJL044C	GYP6	UPTAG0253	0.903992	0.821758	0.72886	1.2413
1_UPTAG0254	1	YDR137W	RGP1	UPTAG0254	1.09192	1.27487	1.36581	0.949251
1_UPTAG0255	1	YER166W	DNF1	UPTAG0255	0.842556	1.04706	0.865581	1.00713
1_UPTAG0256	1	YLR039C	RIC1	UPTAG0256	1.03421	0.805612	0.817469	1.28371
1_UPTAG0257	1	YDR093W	DNF2	UPTAG0257	0.907358	0.966605	0.860524	0.948041
1_UPTAG0258	1	YPL051W	ARL3	UPTAG0258	0.759576	1.3831	1.03077	0.892603
1_UPTAG0259	1	YMR162C	DNF3	UPTAG0259	0.559962	0.90218	0.495664	1.04817
1_UPTAG0260	1	YGR142W	BTN2	UPTAG0260	0.793735	0.89777	0.699159	0.986599
1_UPTAG0261	1	YLR262C	YPT6	UPTAG0261	1.25495	0.793971	0.977613	0.964294
1_UPTAG0262	1	YJL059W	YHC3	UPTAG0262	1.23174	0.891835	1.0778	0.831804
1_UPTAG0263	1	YNL051W	COG5	UPTAG0263	0.856349	1.21523	1.02105	0.831719
1_UPTAG0264	1	YNL041C	COG6	UPTAG0264	1.28115	0.902982	1.13504	0.900898
1_UPTAG0265	1	YML071C	COG8	UPTAG0265	0.839814	0.822973	0.678116	1.09133
1_UPTAG0266	1	YGL005C	COG7	UPTAG0266	0.82339	2.03781	1.64628	0.790353
1_UPTAG0268	1	YOR275C	RIM20	UPTAG0268	0.827703	0.974644	0.791509	1.14392
1_UPTAG0269	1	YOL116W	MSN1	UPTAG0269	0.840261	1.14607	0.944844	0.849781
1_UPTAG0271	1	YJR044C	VPS55	UPTAG0271	0.914112	0.895336	0.80301	0.91662
1_UPTAG0272	1	YLR360W	VPS38	UPTAG0272	1.12283	0.974765	1.07386	0.990027
1_UPTAG0273	1	YAL002W	VPS8	UPTAG0273	0.697423	1.31271	0.898255	0.938588
1_UPTAG0274	1	YLR025W	SNF7	UPTAG0274	0.806079	1.03526	0.81877	1.27557
1_UPTAG0275	1	YMR077C	VPS20	UPTAG0275	0.845984	0.886415	0.735757	1.41201
1_UPTAG0276	1	YKL041W	VPS24	UPTAG0276	0.839053	0.918241	0.755929	1.12568
1_UPTAG0277	1	YDR486C	VPS60	UPTAG0277	0.91324	0.891457	0.798768	1.2389
1_UPTAG0281	1	YDR492W	IZH1	UPTAG0281	1.26928	1.25322	1.5607	0.855928
1_UPTAG0282	1	YLR023C	IZH3	UPTAG0282	0.941606	0.861184	0.79561	1.05972
1_UPTAG0283	1	YOL002C	IZH2	UPTAG0283	0.782701	0.873627	0.670899	1.21634
1_UPTAG0284	1	YOL101C	IZH4	UPTAG0284	1.01346	1.08906	1.08291	0.946303
1_UPTAG0285	1	YMR010W	YMR010W	UPTAG0285	0.940672	1.08582	1.00215	1.07842
1_UPTAG0286	1	YHR195W	NVJ1	UPTAG0286	0.787023	1.31494	1.01538	0.914966
1_UPTAG0287	1	YGL014W	PUF4	UPTAG0287	1.28722	0.750225	0.947503	1.06729
1_UPTAG0288	1	YPL037C	EGD1	UPTAG0288	0.997924	0.88624	0.867729	1.12425
1_UPTAG0289	1	YHR193C	EGD2	UPTAG0289	0.956545	1.13746	1.06752	0.990895
1_UPTAG0290	1	YCR020C-A	MAK31	UPTAG0290	1.12062	1.06672	1.17285	1.02645
1_UPTAG0291	1	YEL053C	MAK10	UPTAG0291	0.935399	0.61913	0.568217	1.02044
1_UPTAG0292	1	YPR051W	MAK3	UPTAG0292	0.945167	1.13998	1.05716	1.01602
1_UPTAG0293	1	YIL016W	SNL1	UPTAG0293	0.889517	1.05681	0.922327	0.995925
1_UPTAG0294	1	YML038C	YMD8	UPTAG0294	0.829313	0.915818	0.745183	1.07711
1_UPTAG0295	1	YKL209C	STE6	UPTAG0295	0.859211	1.27667	1.07625	0.943855
1_UPTAG0296	1	YDR410C	STE14	UPTAG0296	0.876665	1.21907	1.04857	0.971271
1_UPTAG0297	1	YIR004W	DJP1	UPTAG0297	0.90788	0.949972	0.846203	1.02941
1_UPTAG0298	1	YNL329C	PEX6	UPTAG0298	1.27638	1.12593	1.41002	1.01911
1_UPTAG0299	1	YOR084W	LPX1	UPTAG0299	0.928707	1.35768	1.23712	0.904332
1_UPTAG0300	1	YDR265W	PEX10	UPTAG0300	1.24231	0.872111	1.06301	1.06373
1_UPTAG0301	1	YMR026C	PEX12	UPTAG0301	1.15798	0.763192	0.867098	1.16513
1_UPTAG0302	1	YNL214W	PEX17	UPTAG0302	1.04461	0.895107	0.917409	1.07378
1_UPTAG0303	1	YJL210W	PEX2	UPTAG0303	1.01071	1.00558	0.997185	1.06746
1_UPTAG0304	1	YPL112C	PEX25	UPTAG0304	0.845688	1.39106	1.15423	0.936362
1_UPTAG0305	1	YOR193W	PEX27	UPTAG0305	1.02647	1.29963	1.30889	0.857529
1_UPTAG0306	1	YDR479C	PEX29	UPTAG0306	0.675235	1.13506	0.751984	0.825269
1_UPTAG0307	1	YKL197C	PEX1	UPTAG0307	1.28231	0.955333	1.20194	1.03072
1_UPTAG0308	1	YLR324W	PEX30	UPTAG0308	1.0138	0.963363	0.958247	0.917169
1_UPTAG0309	1	YPR128C	ANT1	UPTAG0309	1.13573	0.858731	0.956901	0.901457
1_UPTAG0310	1	YDL065C	PEX19	UPTAG0310	0.867368	0.841373	0.716023	1.08774
1_UPTAG0311	1	YDR244W	PEX5	UPTAG0311	0.882972	0.895373	0.775687	1.07131
1_UPTAG0312	1	YDR142C	PEX7	UPTAG0312	0.929451	0.897755	0.818691	1.03724
1_UPTAG0313	1	YOL147C	PEX11	UPTAG0313	1.01865	1.96559	1.96451	0.676761
1_UPTAG0314	1	YLR191W	PEX13	UPTAG0314	1.25902	0.85051	1.05062	1.06023
1_UPTAG0315	1	YOL044W	PEX15	UPTAG0315	1.25965	0.843901	1.04299	0.972946
1_UPTAG0316	1	YDR329C	PEX3	UPTAG0316	1.08395	1.28637	1.36807	0.971396
1_UPTAG0317	1	YGR077C	PEX8	UPTAG0317	0.987103	0.776132	0.75168	1.14428
1_UPTAG0318	1	YGR133W	PEX4	UPTAG0318	0.832493	1.36126	1.11188	0.88229
1_UPTAG0319	1	YML121W	GTR1	UPTAG0319	1.13455	1.27709	1.42161	1.01093
1_UPTAG0320	1	YBR171W	SEC66	UPTAG0320	1.7223	0.660705	1.11648	1.31053
1_UPTAG0321	1	YLR292C	SEC72	UPTAG0321	1.02339	0.935091	0.938923	1.05151
1_UPTAG0322	1	YHR013C	ARD1	UPTAG0322	0.249472	1.49378	0.365631	1.06353
1_UPTAG0323	1	YDL040C	NAT1	UPTAG0323	0.233932	1.40343	0.322119	1.19122
1_UPTAG0325	1	YNR032W	PPG1	UPTAG0325	0.954259	0.975682	0.913503	1.18394
1_UPTAG0326	1	YGR123C	PPT1	UPTAG0326	0.855357	0.921091	0.773011	1.07357
1_UPTAG0327	1	YDR477W	SNF1	UPTAG0327	1.05552	0.925974	0.958964	0.881987
1_UPTAG0328	1	YDR490C	PKH1	UPTAG0328	0.953146	1.1973	1.11969	0.996303
1_UPTAG0329	1	YKL126W	YPK1	UPTAG0329	1.15398	0.85828	0.97177	1.25022
1_UPTAG0330	1	YHR079C	IRE1	UPTAG0330	1.00206	1.11922	1.10039	0.944703
1_UPTAG0334	1	YNL265C	IST1	UPTAG0334	1.11632	1.21726	1.33324	1.06681
1_UPTAG0335	1	YGR105W	VMA21	UPTAG0335	1.51815	1.51927	2.26299	0.734691
1_UPTAG0337	1	YHR060W	VMA22	UPTAG0337	1.53002	0.809656	1.21544	1.03329
1_UPTAG0338	1	YKL119C	VPH2	UPTAG0338	5.40614	0.542094	2.87539	0.738061
1_UPTAG0340	1	YDL122W	UBP1	UPTAG0340	0.946196	1.1187	1.03856	1.00926
1_UPTAG0341	1	YLR216C	CPR6	UPTAG0341	0.716603	3.01515	2.11994	0.729431
1_UPTAG0342	1	YBR169C	SSE2	UPTAG0342	1.40984	1.01942	1.41012	0.78653
1_UPTAG0343	1	YLL024C	SSA2	UPTAG0343	0.971606	1.3107	1.24947	0.858825
1_UPTAG0344	1	YDR518W	EUG1	UPTAG0344	1.29987	0.969017	1.23585	1.03287
1_UPTAG0345	1	YOL088C	MPD2	UPTAG0345	1.00024	1.01218	0.993338	1.01217
1_UPTAG0346	1	YML078W	CPR3	UPTAG0346	1.12771	1.0572	1.16975	1.08704
1_UPTAG0347	1	YOR288C	MPD1	UPTAG0347	0.910977	0.974084	0.870641	1.00571
1_UPTAG0349	1	YMR161W	HLJ1	UPTAG0349	0.923153	1.25313	1.13502	0.90019
1_UPTAG0350	1	YJL073W	JEM1	UPTAG0350	1.11372	0.959996	1.04901	1.1803
1_UPTAG0351	1	YOR357C	SNX3	UPTAG0351	0.833739	1.34013	1.09626	0.852393
1_UPTAG0352	1	YDR155C	CPR1	UPTAG0352	1.0496	0.873253	0.899293	1.11474
1_UPTAG0353	1	YLR121C	YPS3	UPTAG0353	0.85636	1.13819	0.95633	0.952687
1_UPTAG0354	1	YKL010C	UFD4	UPTAG0354	0.860009	1.08742	0.917558	0.933373
1_UPTAG0355	1	YER100W	UBC6	UPTAG0355	0.841377	1.04152	0.859796	1.18357
1_UPTAG0356	1	YLR120C	YPS1	UPTAG0356	0.93695	1.05165	0.966774	0.983534
1_UPTAG0357	1	YMR274C	RCE1	UPTAG0357	0.90075	1.27171	1.1239	0.822131
1_UPTAG0358	1	YLR250W	SSP120	UPTAG0358	0.975663	1.13515	1.08665	0.965339
1_UPTAG0359	1	YPR149W	NCE102	UPTAG0359	0.837136	1.24141	1.01964	0.883437
1_UPTAG0360	1	YBR162W-A	YSY6	UPTAG0360	0.889675	0.920655	0.803643	1.05941
1_UPTAG0362	1	YDR425W	SNX41	UPTAG0362	0.798615	1.0928	0.856276	1.07114
1_UPTAG0363	1	YKL073W	LHS1	UPTAG0363	1.15283	1.00512	1.13689	1.33838
1_UPTAG0364	1	YDR313C	PIB1	UPTAG0364	1.21543	1.08286	1.29133	1.01667
1_UPTAG0365	1	YIL005W	EPS1	UPTAG0365	0.939004	1.01256	0.932873	0.981535
1_UPTAG0366	1	YDR414C	ERD1	UPTAG0366	0.963819	0.855422	0.80893	1.07615
1_UPTAG0367	1	YKL002W	DID4	UPTAG0367	1.05776	0.879992	0.913275	1.31517
1_UPTAG0368	1	YPR173C	VPS4	UPTAG0368	0.975325	0.967649	0.925981	1.22628
1_UPTAG0369	1	YNR006W	VPS27	UPTAG0369	0.869325	1.01275	0.863812	1.28336
1_UPTAG0370	1	YJL053W	PEP8	UPTAG0370	2.03763	1.00768	2.01458	0.979294
1_UPTAG0371	1	YJL154C	VPS35	UPTAG0371	0.995255	0.832022	0.812464	1.28636
1_UPTAG0372	1	YOR069W	VPS5	UPTAG0372	0.997718	1.18224	1.15731	0.990912
1_UPTAG0373	1	YLL040C	VPS13	UPTAG0373	0.861344	0.837896	0.708112	1.23457
1_UPTAG0374	1	YBL069W	AST1	UPTAG0374	0.967006	1.45342	1.37897	1.02512
1_UPTAG0375	1	YLR246W	ERF2	UPTAG0375	0.806042	1.07322	0.848751	1.08881
1_UPTAG0376	1	YOR297C	TIM18	UPTAG0376	1.12849	0.920668	1.01938	1.10067
1_UPTAG0377	1	YHR160C	PEX18	UPTAG0377	0.698341	1.01271	0.693886	0.916016
1_UPTAG0378	1	YGR239C	PEX21	UPTAG0378	0.7292	1.1974	0.856685	0.881589
1_UPTAG0379	1	YGL153W	PEX14	UPTAG0379	0.988403	0.920918	0.89308	1.14815
1_UPTAG0380	1	YAL055W	PEX22	UPTAG0380	1.00655	1.01655	1.00392	1.00569
1_UPTAG0381	1	YGR141W	VPS62	UPTAG0381	0.832238	0.999425	0.816081	0.932023
1_UPTAG0382	1	YJR126C	VPS70	UPTAG0382	0.909844	1.61208	1.4391	0.894479
1_UPTAG0383	1	YMR004W	MVP1	UPTAG0383	1.23301	0.840366	1.01665	1.23284
1_UPTAG0384	1	YDR495C	VPS3	UPTAG0384	1.68963	0.843258	1.39794	0.836976
1_UPTAG0385	1	YPR139C	LOA1	UPTAG0385	1.63275	0.813358	1.30298	1.25181
1_UPTAG0386	1	YOL082W	ATG19	UPTAG0386	0.916877	1.17021	1.05272	0.981252
1_UPTAG0388	1	YML097C	VPS9	UPTAG0388	0.611984	3.23634	1.94325	0.604053
1_UPTAG0389	1	YOR359W	VTS1	UPTAG0389	0.936387	0.91579	0.841368	1.02323
1_UPTAG0390	1	YHL002W	HSE1	UPTAG0390	0.989368	1.31599	1.27746	0.842808
1_UPTAG0392	1	YOL129W	VPS68	UPTAG0392	1.19867	1.02886	1.21002	1.10565
1_UPTAG0395	1	YBL078C	ATG8	UPTAG0395	0.866913	3.51605	2.99065	0.592674
1_UPTAG0397	1	YNR007C	ATG3	UPTAG0397	0.930192	1.00944	0.921269	0.940475
1_UPTAG0398	1	YLR085C	ARP6	UPTAG0398	0.677369	1.05181	0.699032	1.02078
1_UPTAG0399	1	YHR171W	ATG7	UPTAG0399	1.3951	0.875321	1.19814	1.06751
1_UPTAG0400	1	YDL149W	ATG9	UPTAG0400	1.01081	1.02767	1.0192	0.972246
1_UPTAG0401	1	YKR035W-A	DID2	UPTAG0401	0.928069	0.863624	0.786395	1.24371
1_UPTAG0402	1	YKR001C	VPS1	UPTAG0402	1.12378	1.05599	1.16433	0.984831
1_UPTAG0403	1	YDR200C	VPS64	UPTAG0403	0.73835	1.13622	0.823117	0.993372
1_UPTAG0404	1	YDR485C	VPS72	UPTAG0404	0.833179	1.17247	0.958459	0.918997
1_UPTAG0405	1	YFR021W	ATG18	UPTAG0405	2.02963	0.887609	1.76756	0.848922
1_UPTAG0406	1	YPL149W	ATG5	UPTAG0406	1.10255	1.12254	1.21433	0.99497
1_UPTAG0407	1	YGL124C	MON1	UPTAG0407	0.782605	1.16219	0.892393	0.898303
1_UPTAG0408	1	YNL297C	MON2	UPTAG0408	1.05577	1.08445	1.12335	0.895882
1_UPTAG0409	1	YBR290W	BSD2	UPTAG0409	1.1958	1.16374	1.36537	0.879539
1_UPTAG0410	1	YLR119W	SRN2	UPTAG0410	1.02411	0.90358	0.907918	1.25585
1_UPTAG0411	1	YCL008C	STP22	UPTAG0411	1.07542	0.817209	0.862278	1.41029
1_UPTAG0412	1	YPL065W	VPS28	UPTAG0412	0.797233	0.94442	0.73873	1.44837
1_UPTAG0413	1	YPL002C	SNF8	UPTAG0413	1.0692	1.25469	1.31622	1.06126
1_UPTAG0414	1	YJR102C	VPS25	UPTAG0414	0.959041	1.53056	1.4402	1.07924
1_UPTAG0415	1	YLR417W	VPS36	UPTAG0415	0.963681	0.893742	0.845047	1.40802
1_UPTAG0416	1	YPR049C	ATG11	UPTAG0416	1.20405	0.911863	1.07723	0.950608
1_UPTAG0417	1	YPR185W	ATG13	UPTAG0417	0.892733	1.63786	1.43461	0.738482
1_UPTAG0418	1	YNL242W	ATG2	UPTAG0418	1.00017	1.21079	1.18816	0.980809
1_UPTAG0420	1	YKR020W	VPS51	UPTAG0420	1.63797	0.822181	1.32132	1.20826
1_UPTAG0421	1	YCL038C	ATG22	UPTAG0421	1.11297	1.46956	1.60475	0.653043
1_UPTAG0422	1	YEL027W	VMA3	UPTAG0422	2.76767	0.590358	1.60312	0.831462
1_UPTAG0423	1	YKR014C	YPT52	UPTAG0423	0.94502	1.09222	1.01271	1.06296
1_UPTAG0424	1	YNL093W	YPT53	UPTAG0424	0.762817	1.19104	0.891423	0.980781
1_UPTAG0425	1	YDL113C	ATG20	UPTAG0425	1.50401	1.30371	1.92383	0.796427
1_UPTAG0426	1	YBR217W	ATG12	UPTAG0426	1.10917	1.49652	1.62861	0.776807
1_UPTAG0427	1	YPL120W	VPS30	UPTAG0427	0.929418	1.19812	1.09256	0.951205
1_UPTAG0428	1	YBR131W	CCZ1	UPTAG0428	0.964387	1.08355	1.02527	0.877718
1_UPTAG0429	1	YNL223W	ATG4	UPTAG0429	1.31942	1.33211	1.72447	0.819179
1_UPTAG0430	1	YOR089C	VPS21	UPTAG0430	0.849072	1.1738	0.977855	1.10295
1_UPTAG0431	1	YML041C	VPS71	UPTAG0431
1_UPTAG0432	1	YBR164C	ARL1	UPTAG0432	0.867987	1.18601	1.01004	0.832976
1_UPTAG0433	1	YPL045W	VPS16	UPTAG0433	1.37908	1.00436	1.35899	1.20457
1_UPTAG0434	1	YEL013W	VAC8	UPTAG0434	1.23092	0.731838	0.883856	1.13442
1_UPTAG0435	1	YCL057W	PRD1	UPTAG0435	0.950483	0.940702	0.877267	1.09069
1_UPTAG0436	1	YGR132C	PHB1	UPTAG0436	0.978286	0.943998	0.906092	1.03285
1_UPTAG0437	1	YGR231C	PHB2	UPTAG0437	0.748318	1.05013	0.771014	1.02072
1_UPTAG0439	1	YGR086C	PIL1	UPTAG0439	1.03265	0.967005	0.979753	1.12448
1_UPTAG0440	1	YDL100C	GET3	UPTAG0440	1.16518	0.930694	1.06398	0.878683
1_UPTAG0441	1	YJR032W	CPR7	UPTAG0441	1.60025	0.922404	1.44825	0.913104
1_UPTAG0443	1	YBL075C	SSA3	UPTAG0443	0.83055	1.19767	0.97597	0.945017
1_UPTAG0445	1	YDR059C	UBC5	UPTAG0445	1.18901	1.09641	1.27906	0.980514
1_UPTAG0446	1	YGR038W	ORM1	UPTAG0446	1.04361	0.86496	0.885664	1.08903
1_UPTAG0447	1	YLR350W	ORM2	UPTAG0447	1.02863	0.960229	0.969099	0.915675
1_UPTAG0448	1	YCR044C	PER1	UPTAG0448	1.35752	1.03617	1.38011	1.01427
1_UPTAG0449	1	YOR132W	VPS17	UPTAG0449	1.15793	0.989956	1.12469	1.01243
1_UPTAG0450	1	YHR012W	VPS29	UPTAG0450	1.01351	0.841632	0.83692	1.12649
1_UPTAG0451	1	YML048W	GSF2	UPTAG0451	1.44894	0.807669	1.1482	0.896198
1_UPTAG0452	1	YDL018C	ERP3	UPTAG0452	1.00715	0.906581	0.89585	1.03984
1_UPTAG0453	1	YOR016C	ERP4	UPTAG0453	0.893277	0.888748	0.778932	1.06495
1_UPTAG0454	1	YHR110W	ERP5	UPTAG0454	1.08387	1.01663	1.08112	0.914362
1_UPTAG0455	1	YPR095C	SYT1	UPTAG0455	1.09249	0.914855	0.980627	1.02551
1_UPTAG0456	1	YGL002W	ERP6	UPTAG0456	1.04341	0.92847	0.950516	1.00353
1_UPTAG0457	1	YDR229W	IVY1	UPTAG0457	0.918809	1.7116	1.54299	0.69976
1_UPTAG0458	1	YJL117W	PHO86	UPTAG0458	1.35564	1.17155	1.55825	0.754844
1_UPTAG0459	1	YGL167C	PMR1	UPTAG0459	1.72892	0.774082	1.3131	1.05772
1_UPTAG0460	1	YJR010C-A	SPC1	UPTAG0460	1.00085	1.06585	1.04665	0.96931
1_UPTAG0461	1	YML055W	SPC2	UPTAG0461	1.07135	1.1298	1.1876	0.944358
1_UPTAG0462	1	YDL138W	RGT2	UPTAG0462	0.954784	1.00044	0.937199	0.983017
1_UPTAG0463	1	YDL194W	SNF3	UPTAG0463	0.828897	1.04566	0.850406	1.07272
1_UPTAG0464	1	YLR330W	CHS5	UPTAG0464	0.879423	0.856537	0.73906	1.16207
1_UPTAG0465	1	YMR017W	SPO20	UPTAG0465	0.867608	0.898843	0.765143	0.929674
1_UPTAG0466	1	YKR031C	SPO14	UPTAG0466	0.908806	1.04262	0.929681	0.885662
1_UPTAG0467	1	YNR049C	MSO1	UPTAG0467	0.921082	0.956423	0.864338	1.06732
1_UPTAG0468	1	YPL154C	PEP4	UPTAG0468	0.823071	1.08708	0.877876	0.883881
1_UPTAG0469	1	YEL060C	PRB1	UPTAG0469	0.786846	1.16672	0.90072	0.963411
1_UPTAG0470	1	YOL031C	SIL1	UPTAG0470	0.977875	0.989135	0.949018	1.02373
1_UPTAG0471	1	YER087C-B	SBH1	UPTAG0471	1.01099	1.04512	1.03669	0.933551
1_UPTAG0472	1	YLR083C	EMP70	UPTAG0472	1.03626	0.917901	0.933256	1.02358
1_UPTAG0473	1	YLL043W	FPS1	UPTAG0473	1.34074	0.931108	1.22484	0.939355
1_UPTAG0474	1	YPL084W	BRO1	UPTAG0474	0.568033	0.950325	0.52964	1.28669
1_UPTAG0475	1	YER143W	DDI1	UPTAG0475	0.85769	0.985504	0.829323	0.975058
1_UPTAG0479	1	YPL234C	VMA11	UPTAG0479	1.4666	1.11188	1.59994	0.899533
1_UPTAG0480	1	YPR036W	VMA13	UPTAG0480	1.44245	0.964349	1.3648	0.799001
1_UPTAG0481	1	YOR332W	VMA4	UPTAG0481	1.41488	0.949095	1.31754	0.79685
1_UPTAG0482	1	YKL080W	VMA5	UPTAG0482
1_UPTAG0483	1	YGR020C	VMA7	UPTAG0483	1.99446	1.28345	2.51153	0.749017
1_UPTAG0484	1	YEL051W	VMA8	UPTAG0484	1.55187	1.02048	1.5538	0.836207
1_UPTAG0485	1	YJR033C	RAV1	UPTAG0485	1.94613	0.771567	1.47326	0.768907
1_UPTAG0486	1	YHR039C-A	VMA10	UPTAG0486	2.26466	0.729798	1.62159	0.694941
1_UPTAG0487	1	YDR456W	NHX1	UPTAG0487	0.958163	0.706686	0.664356	1.12053
1_UPTAG0488	1	YDR202C	RAV2	UPTAG0488	0.887258	1.06772	0.929487	1.00154
1_UPTAG0489	1	YDL185W	VMA1	UPTAG0489	0.823742	0.89012	0.719407	0.951026
1_UPTAG0490	1	YLR447C	VMA6	UPTAG0490	1.72244	0.711622	1.20262	0.729403
1_UPTAG0491	1	YOR270C	VPH1	UPTAG0491	1.09068	0.890136	0.95255	0.863138
1_UPTAG0493	1	YMR297W	PRC1	UPTAG0493	1.02731	1.10198	1.11073	1.00494
1_UPTAG0494	1	YLR373C	VID22	UPTAG0494	1.50843	0.926707	1.37152	1.08148
1_UPTAG0495	1	YBR286W	APE3	UPTAG0495	0.764123	0.863299	0.647231	1.1205
1_UPTAG0496	1	YKL103C	APE1	UPTAG0496	0.946214	0.943913	0.876308	0.957134
1_UPTAG0497	1	YPR079W	MRL1	UPTAG0497	1.31332	0.779779	1.0048	0.997393
1_UPTAG0498	1	YHR138C	YHR138C	UPTAG0498	1.11392	0.770989	0.842629	1.09941
1_UPTAG0499	1	YER072W	VTC1	UPTAG0499	0.831504	0.835386	0.681533	0.855656
1_UPTAG0500	1	YPL019C	VTC3	UPTAG0500	0.803603	0.856731	0.675494	1.10997
1_UPTAG0502	1	YNL015W	PBI2	UPTAG0502	0.87599	0.797313	0.685272	1.10566
1_UPTAG0504	1	YNL054W	VAC7	UPTAG0504	2.19022	0.655969	1.40963	1.32326
1_UPTAG0505	1	YLR386W	VAC14	UPTAG0505	1.16959	1.0021	1.14995	0.875547
1_UPTAG0506	1	YDL077C	VAM6	UPTAG0506	1.00363	0.863619	0.850418	1.10961
1_UPTAG0508	1	YOL018C	TLG2	UPTAG0508	0.859147	0.935136	0.788274	1.05962
1_UPTAG0509	1	YLR093C	NYV1	UPTAG0509	1.39268	0.80398	1.09858	1.1816
1_UPTAG0510	1	YDR323C	PEP7	UPTAG0510	1.33531	1.27807	1.67445	0.958316
1_UPTAG0511	1	YMR183C	SSO2	UPTAG0511	0.90693	0.975472	0.868008	1.08445
1_UPTAG0513	1	YPL232W	SSO1	UPTAG0513	0.802397	1.10756	0.871953	0.962935
1_UPTAG0514	1	YOR106W	VAM3	UPTAG0514	1.25897	0.935488	1.15555	0.977677
1_UPTAG0515	1	YGL212W	VAM7	UPTAG0515	1.06795	1.16966	1.22559	0.956548
1_UPTAG0516	1	YAR031W	PRM9	UPTAG0516	0.929323	1.37928	1.25763	0.877096
1_UPTAG0517	1	YJL178C	ATG27	UPTAG0517	0.809493	1.06475	0.845658	1.04506
1_UPTAG0518	1	YKL135C	APL2	UPTAG0518	1.02852	1.13715	1.14754	1.05098
1_UPTAG0519	1	YPR029C	APL4	UPTAG0519	0.972463	0.851434	0.81238	1.17484
1_UPTAG0520	1	YPL259C	APM1	UPTAG0520	1.00341	0.953327	0.938544	0.987284
1_UPTAG0521	1	YHL019C	APM2	UPTAG0521	0.845021	1.01245	0.839411	0.985039
1_UPTAG0522	1	YLR170C	APS1	UPTAG0522	0.804053	1.15099	0.908015	1.13253
1_UPTAG0523	1	YJR005W	APL1	UPTAG0523	0.915582	3.52247	3.16432	0.708375
1_UPTAG0524	1	YBL037W	APL3	UPTAG0524	0.876722	0.737837	0.634684	1.02438
1_UPTAG0525	1	YJR058C	APS2	UPTAG0525	0.661426	1.1249	0.730009	1.01431
1_UPTAG0529	1	YLR309C	IMH1	UPTAG0529	1.14026	0.949702	1.0625	1.01595
1_UPTAG0530	1	YPL249C	GYP5	UPTAG0530	1.04635	1.50775	1.5479	0.88769
1_UPTAG0531	1	YPR028W	YOP1	UPTAG0531	0.963973	1.04609	0.98939	1.01713
1_UPTAG0532	1	YFL027C	GYP8	UPTAG0532	0.799099	0.983577	0.77116	1.03445
1_UPTAG0533	1	YAL048C	GEM1	UPTAG0533	1.0984	1.29824	1.3991	0.901678
1_UPTAG0535	1	YGL023C	PIB2	UPTAG0535	1.11522	1.00009	1.0943	1.0825
1_UPTAG0536	1	YJR110W	YMR1	UPTAG0536	1.36143	0.808371	1.07979	0.982885
1_UPTAG0537	1	YPL145C	KES1	UPTAG0537	0.652185	3.79271	2.42692	0.484719
1_UPTAG0538	1	YCR034W	ELO2	UPTAG0538	2.15338	0.759896	1.6055	1.46404
1_UPTAG0539	1	YBR105C	VID24	UPTAG0539	1.18007	0.896654	1.03817	0.972272
1_UPTAG0540	1	YER031C	YPT31	UPTAG0540	1.16623	0.909904	1.04116	0.838242
1_UPTAG0541	1	YGL210W	YPT32	UPTAG0541	1.09347	0.970665	1.04139	1.00539
1_UPTAG0543	1	YKL176C	LST4	UPTAG0543	0.9163	0.894094	0.803815	0.97384
1_UPTAG0544	1	YGR057C	LST7	UPTAG0544	1.66624	0.685445	1.12058	1.21686
1_UPTAG0577	1	YBL015W	ACH1	UPTAG0577	0.928154	0.958986	0.873308	1.00592
1_UPTAG0578	1	YGR268C	HUA1	UPTAG0578	0.979644	1.14238	1.09803	0.947815
1_UPTAG0579	1	YOR284W	HUA2	UPTAG0579	0.829877	1.25519	1.02202	0.945566
1_UPTAG0580	1	YLR144C	ACF2	UPTAG0580	0.917784	1.20953	1.08916	0.958917
1_UPTAG0581	1	YJR083C	ACF4	UPTAG0581	1.21809	0.753134	0.90009	1.1376
1_UPTAG0582	1	YLR410W	VIP1	UPTAG0582	1.15855	1.10744	1.25884	0.768838
1_UPTAG0583	1	YPR154W	PIN3	UPTAG0583	1.16283	1.11296	1.26979	0.9248
1_UPTAG0584	1	YJL020C	BBC1	UPTAG0584	0.980879	0.913358	0.879005	1.02459
1_UPTAG0586	1	YNL047C	SLM2	UPTAG0586	0.787698	0.974231	0.752934	1.09181
1_UPTAG0587	1	YOR239W	ABP140	UPTAG0587	0.705575	2.62292	1.81578	0.541131
1_UPTAG0589	1	YOR035C	SHE4	UPTAG0589	2.18755	0.743376	1.59552	1.36671
1_UPTAG0590	1	YBR059C	AKL1	UPTAG0590	1.07742	1.16866	1.2354	0.911628
1_UPTAG0591	1	YJL100W	LSB6	UPTAG0591	0.76806	1.01453	0.764532	1.10495
1_UPTAG0593	1	YFR024C-A	LSB3	UPTAG0593	0.816971	1.12647	0.902943	0.985189
1_UPTAG0594	1	YOL112W	MSB4	UPTAG0594	0.933748	1.2743	1.16745	0.821642
1_UPTAG0596	1	YNL079C	TPM1	UPTAG0596	1.7267	1.14405	1.9382	0.959763
1_UPTAG0597	1	YIL138C	TPM2	UPTAG0597	1.1023	1.58585	1.71514	0.847707
1_UPTAG0598	1	YDR245W	MNN10	UPTAG0598	2.34703	0.953143	2.19489	1.05773
1_UPTAG0599	1	YIL159W	BNR1	UPTAG0599	0.961921	0.981036	0.92589	0.978729
1_UPTAG0601	1	YER149C	PEA2	UPTAG0601	1.01418	1.14351	1.13786	0.931357
1_UPTAG0602	1	YNL271C	BNI1	UPTAG0602	1.73697	1.03336	1.76108	1.02225
1_UPTAG0603	1	YLL021W	SPA2	UPTAG0603	1.14378	1.09297	1.22655	0.973092
1_UPTAG0604	1	YLR313C	SPH1	UPTAG0604	0.901995	1.50289	1.33004	0.916287
1_UPTAG0605	1	YKR055W	RHO4	UPTAG0605	0.835748	1.19603	0.980736	0.978651
1_UPTAG0606	1	YNL094W	APP1	UPTAG0606	1.27738	0.909087	1.13936	0.817731
1_UPTAG0607	1	YHR114W	BZZ1	UPTAG0607	0.922948	1.72536	1.5624	0.999607
1_UPTAG0608	1	YNL084C	END3	UPTAG0608	1.0907	1.07936	1.15507	0.962946
1_UPTAG0609	1	YLR429W	CRN1	UPTAG0609	0.911312	0.858109	0.767264	1.00177
1_UPTAG0610	1	YOR367W	SCP1	UPTAG0610	1.35758	1.06409	1.41736	0.883556
1_UPTAG0611	1	YDR129C	SAC6	UPTAG0611	1.49358	0.840744	1.23205	1.40973
1_UPTAG0612	1	YDL135C	RDI1	UPTAG0612	1.13855	0.990302	1.10626	1.00283
1_UPTAG0613	1	YOR127W	RGA1	UPTAG0613	1.04771	1.23062	1.26502	0.944579
1_UPTAG0614	1	YDR379W	RGA2	UPTAG0614	0.88636	0.951429	0.827412	0.938164
1_UPTAG0615	1	YLR370C	ARC18	UPTAG0615	2.19351	0.752602	1.61972	1.21265
1_UPTAG0616	1	YJR084W	YJR084W	UPTAG0616	1.12976	0.98716	1.09423	0.991672
1_UPTAG0617	1	YDL216C	RRI1	UPTAG0617	0.934223	0.857427	0.785929	1.00398
1_UPTAG0618	1	YMR025W	CSI1	UPTAG0618	1.22029	0.803572	0.962107	1.06422
1_UPTAG0619	1	YDR179C	CSN9	UPTAG0619	1.08094	0.920992	0.976774	0.962095
1_UPTAG0620	1	YOL117W	RRI2	UPTAG0620	1.10094	1.26842	1.37013	0.805345
1_UPTAG0621	1	YNR044W	AGA1	UPTAG0621	1.00621	1.2611	1.245	0.896766
1_UPTAG0622	1	YGL032C	AGA2	UPTAG0622	1.28201	1.04779	1.31796	0.948399
1_UPTAG0623	1	YJR004C	SAG1	UPTAG0623	0.866539	1.38317	1.17598	0.988496
1_UPTAG0625	1	YGL180W	ATG1	UPTAG0625	0.92277	0.917058	0.830282	1.01071
1_UPTAG0626	1	YBR210W	ERV15	UPTAG0626	0.873078	1.10473	0.946335	0.922902
1_UPTAG0627	1	YKL007W	CAP1	UPTAG0627	1.19737	0.959703	1.12746	1.07613
1_UPTAG0628	1	YIL034C	CAP2	UPTAG0628	0.829787	1.29627	1.05535	1.03355
1_UPTAG0629	1	YDL049C	KNH1	UPTAG0629	1.02125	1.39698	1.39978	0.953266
1_UPTAG0630	1	YMR306W	FKS3	UPTAG0630	0.873683	1.39935	1.19954	0.792509
1_UPTAG0631	1	YMR215W	GAS3	UPTAG0631	0.999925	0.899533	0.88251	1.02981
1_UPTAG0632	1	YOL132W	GAS4	UPTAG0632	1.11478	1.02017	1.11582	0.955557
1_UPTAG0633	1	YOL030W	GAS5	UPTAG0633	1.18981	0.932776	1.0889	1.01378
1_UPTAG0634	1	YLR343W	GAS2	UPTAG0634	0.56272	4.42954	2.4456	0.399385
1_UPTAG0635	1	YIR003W	AIM21	UPTAG0635	1.06458	0.954114	0.99658	0.990599
1_UPTAG0636	1	YKR100C	SKG1	UPTAG0636	1.01198	1.63165	1.62008	0.783885
1_UPTAG0637	1	YNL087W	TCB2	UPTAG0637	1.12625	0.976661	1.07923	1.03535
1_UPTAG0638	1	YMR295C	YMR295C	UPTAG0638	1.02112	0.844372	0.845955	0.991814
1_UPTAG0639	1	YOR264W	DSE3	UPTAG0639	0.801779	1.15336	0.907305	1.0371
1_UPTAG0640	1	YDR348C	PAL1	UPTAG0640	1.00463	0.854793	0.842559	1.06342
1_UPTAG0641	1	YPL158C	AIM44	UPTAG0641	1.06346	1.46264	1.52613	1.01066
1_UPTAG0642	1	YPL221W	FLC1	UPTAG0642	0.69373	1.04683	0.712527	1.00656
1_UPTAG0643	1	YHR149C	SKG6	UPTAG0643	0.856616	1.42396	1.19679	0.905786
1_UPTAG0644	1	YCR030C	SYP1	UPTAG0644	1.40325	1.04553	1.43949	1.04942
1_UPTAG0645	1	YLR037C	PAU23	UPTAG0645	1.35346	0.721076	0.957552	1.01521
1_UPTAG0646	1	YBR301W	PAU24	UPTAG0646	1.48335	0.731852	1.06513	1.12023
1_UPTAG0647	1	YJR151C	DAN4	UPTAG0647	1.41989	0.785169	1.09384	0.97085
1_UPTAG0648	1	YJL078C	PRY3	UPTAG0648	1.64759	0.766875	1.23968	1.12149
1_UPTAG0649	1	YDL037C	BSC1	UPTAG0649	1.19953	0.896371	1.05495	1.04734
1_UPTAG0650	1	YNR069C	BSC5	UPTAG0650	1.07799	0.741697	0.784467	1.03051
1_UPTAG0651	1	YLR213C	CRR1	UPTAG0651	0.811466	0.944234	0.75177	1.05019
1_UPTAG0652	1	YBR033W	EDS1	UPTAG0652	0.935765	0.921957	0.846472	1.04267
1_UPTAG0654	1	YLR099C	ICT1	UPTAG0654	0.960641	1.26689	1.19408	0.988824
1_UPTAG0656	1	YBL066C	SEF1	UPTAG0656	0.73169	1.13789	0.816887	1.0334
1_UPTAG0657	1	YFR022W	ROG3	UPTAG0657	1.05883	0.800429	0.831539	1.13365
1_UPTAG0658	1	YGL015C	YGL015C	UPTAG0658	0.808615	1.17419	0.931568	1.00006
1_UPTAG0659	1	YGL196W	DSD1	UPTAG0659	0.838116	1.13442	0.932851	1.05396
1_UPTAG0660	1	YJL046W	AIM22	UPTAG0660	1.12873	0.984438	1.09021	1.08506
1_UPTAG0662	1	YKL037W	AIM26	UPTAG0662	1.05707	0.709739	0.736103	1.18502
1_UPTAG0663	1	YLR021W	IRC25	UPTAG0663	0.813008	1.00768	0.803812	1.0965
1_UPTAG0666	1	YOL003C	PFA4	UPTAG0666	0.878269	0.923	0.795361	1.0738
1_UPTAG0667	1	YPL041C	MRX11	UPTAG0667	0.685508	0.888086	0.597314	1.06505
1_UPTAG0668	1	YPL077C	YPL077C	UPTAG0668	0.919027	0.9282	0.83696	1.01512
1_UPTAG0669	1	YBR148W	YSW1	UPTAG0669	1.22592	0.917155	1.10316	0.948751
1_UPTAG0670	1	YGL110C	CUE3	UPTAG0670	0.895577	0.896251	0.787531	1.02098
1_UPTAG0671	1	YOR042W	CUE5	UPTAG0671	0.99193	1.5317	1.4907	0.989564
1_UPTAG0672	1	YAL053W	FLC2	UPTAG0672	1.12242	1.06831	1.1765	1.03889
1_UPTAG0673	1	YDR248C	YDR248C	UPTAG0673	0.957608	0.760661	0.714684	1.05243
1_UPTAG0674	1	YEL020C	YEL020C	UPTAG0674	0.89413	0.909779	0.798127	0.978657
1_UPTAG0675	1	YGR237C	YGR237C	UPTAG0675	0.752627	1.232	0.909755	0.956395
1_UPTAG0676	1	YHR033W	YHR033W	UPTAG0676	0.983466	1.2956	1.25016	1.0498
1_UPTAG0677	1	YML131W	YML131W	UPTAG0677	1.01976	0.949292	0.949799	0.999968
1_UPTAG0678	1	YMR073C	IRC21	UPTAG0678	1.17115	0.83726	0.962072	1.14827
1_UPTAG0679	1	YMR124W	EPO1	UPTAG0679	1.18296	1.02171	1.18586	1.00747
1_UPTAG0680	1	YNL040W	YNL040W	UPTAG0680	0.821282	1.1213	0.903543	0.89915
1_UPTAG0681	1	YJR055W	HIT1	UPTAG0681	1.50761	0.718259	1.06244	1.30843
1_UPTAG0682	1	YGR136W	LSB1	UPTAG0682	0.870578	0.993846	0.848911	1.13341
1_UPTAG0683	1	YBR238C	YBR238C	UPTAG0683	1.11328	1.01568	1.10943	0.929631
1_UPTAG0685	1	YLR414C	PUN1	UPTAG0685	1.18878	1.17176	1.3667	0.928439
1_UPTAG0686	1	YOL070C	NBA1	UPTAG0686	1.2174	0.900284	1.07534	1.02025
1_UPTAG0687	1	YOR304C-A	BIL1	UPTAG0687	0.903314	1.11338	0.986774	0.984605
1_UPTAG0688	1	YJL079C	PRY1	UPTAG0688	0.86796	0.989444	0.842609	0.943626
1_UPTAG0689	1	YDR185C	UPS3	UPTAG0689	1.08648	1.31696	1.40388	0.830833
1_UPTAG0690	1	YDR233C	RTN1	UPTAG0690	0.764108	2.7719	2.0781	0.566371
1_UPTAG0691	1	YBR054W	YRO2	UPTAG0691
1_UPTAG0692	1	YDR314C	RAD34	UPTAG0692	0.883156	0.814524	0.705792	1.09315
1_UPTAG0693	1	YPR045C	THP3	UPTAG0693	1.14926	0.832946	0.939226	1.00399
1_UPTAG0694	1	YBL028C	YBL028C	UPTAG0694	0.848723	1.31423	1.09439	0.949284
1_UPTAG0695	1	YMR195W	ICY1	UPTAG0695	1.16101	0.965729	1.10008	0.843735
1_UPTAG0696	1	YKL161C	KDX1	UPTAG0696	1.11098	0.77316	0.842777	1.29303
1_UPTAG0697	1	YML117W	NAB6	UPTAG0697	1.11006	0.88553	0.964466	0.922084
1_UPTAG0698	1	YIL110W	HPM1	UPTAG0698	0.965221	0.833895	0.78972	1.14445
1_UPTAG0699	1	YNL063W	MTQ1	UPTAG0699	0.837026	1.16781	0.959064	0.928071
1_UPTAG0700	1	YDL178W	DLD2	UPTAG0700	1.05335	0.946416	0.978119	0.982941
1_UPTAG0701	1	YGR080W	TWF1	UPTAG0701	0.858461	0.824151	0.694165	1.10275
1_UPTAG0702	1	YGR152C	RSR1	UPTAG0702	1.04369	1.22672	1.25618	1.01076
1_UPTAG0703	1	YKL092C	BUD2	UPTAG0703	1.24294	0.83049	1.01279	1.12046
1_UPTAG0705	1	YEL029C	BUD16	UPTAG0705	0.898963	0.91731	0.809083	1.23582
1_UPTAG0706	1	YFL023W	BUD27	UPTAG0706	2.1353	0.911319	1.90926	1.17809
1_UPTAG0707	1	YNR027W	BUD17	UPTAG0707	0.740356	0.874454	0.635203	0.915713
1_UPTAG0708	1	YOR301W	RAX1	UPTAG0708	1.48046	0.855057	1.24202	0.959819
1_UPTAG0709	1	YLR084C	RAX2	UPTAG0709	0.858601	1.15525	0.9732	1.02185
1_UPTAG0710	1	YGL174W	BUD13	UPTAG0710	1.23425	1.2927	1.56543	0.99186
1_UPTAG0712	1	YMR014W	BUD22	UPTAG0712	1.35074	1.06689	1.41392	1.02708
1_UPTAG0714	1	YJR092W	BUD4	UPTAG0714	0.702908	2.72058	1.87627	0.608075
1_UPTAG0715	1	YPR122W	AXL1	UPTAG0715	0.939699	1.09916	1.01341	0.978012
1_UPTAG0716	1	YIL140W	AXL2	UPTAG0716	1.09934	0.978623	1.05556	0.983607
1_UPTAG0717	1	YCR063W	BUD31	UPTAG0717	1.23268	1.3998	1.69298	0.652678
1_UPTAG0718	1	YGR221C	TOS2	UPTAG0718	0.886349	1.12128	0.975112	0.971941
1_UPTAG0719	1	YBR267W	REI1	UPTAG0719	1.50136	0.775829	1.14285	1.39379
1_UPTAG0720	1	YKL159C	RCN1	UPTAG0720	0.957789	0.997172	0.937076	1.01473
1_UPTAG0721	1	YGL248W	PDE1	UPTAG0721	0.973931	1.16521	1.11344	0.958639
1_UPTAG0722	1	YOR360C	PDE2	UPTAG0722	1.11655	0.890432	0.975471	0.90351
1_UPTAG0723	1	YNL127W	FAR11	UPTAG0723	1.06394	0.940317	0.98158	1.07317
1_UPTAG0724	1	YFR008W	FAR7	UPTAG0724	3.25702	0.656411	2.09765	1.1192
1_UPTAG0725	1	YMR029C	FAR8	UPTAG0725	1.01225	0.87298	0.867016	1.04336
1_UPTAG0726	1	YLR238W	FAR10	UPTAG0726	0.606576	1.29352	0.769826	0.983643
1_UPTAG0727	1	YML057W	CMP2	UPTAG0727	1.05895	0.894391	0.929264	1.03973
1_UPTAG0728	1	YBR229C	ROT2	UPTAG0728	1.06575	0.964443	1.00848	1.09524
1_UPTAG0729	1	YKL046C	DCW1	UPTAG0729	0.938186	1.05538	0.971482	0.88885
1_UPTAG0730	1	YEL004W	YEA4	UPTAG0730	0.873985	0.9381	0.80443	1.07216
1_UPTAG0731	1	YBL006C	LDB7	UPTAG0731	0.701562	1.11594	0.768141	1.04138
1_UPTAG0733	1	YLR020C	YEH2	UPTAG0733	0.870234	1.55349	1.32641	0.855865
1_UPTAG0734	1	YJR075W	HOC1	UPTAG0734	1.10039	1.13199	1.22214	0.898052
1_UPTAG0735	1	YMR307W	GAS1	UPTAG0735	1.85686	0.784191	1.42868	1.2683
1_UPTAG0736	1	YGR282C	BGL2	UPTAG0736	1.00193	0.959015	0.942753	1.05677
1_UPTAG0737	1	YDR261C	EXG2	UPTAG0737	1.00285	1.16982	1.15104	0.855394
1_UPTAG0738	1	YGL027C	CWH41	UPTAG0738	0.9005	1.56998	1.38712	0.893317
1_UPTAG0739	1	YER124C	DSE1	UPTAG0739	0.909745	1.30117	1.16142	0.913067
1_UPTAG0740	1	YDR055W	PST1	UPTAG0740	0.904822	1.53604	1.36364	0.705999
1_UPTAG0741	1	YEL040W	UTR2	UPTAG0741	1.15011	0.760657	0.85835	1.06146
1_UPTAG0742	1	YHR021W-A	ECM12	UPTAG0742	1.0234	0.930531	0.934353	0.926831
1_UPTAG0743	1	YBL043W	ECM13	UPTAG0743	1.12787	0.774506	0.857072	0.960457
1_UPTAG0744	1	YLR390W	ECM19	UPTAG0744	0.901542	0.861999	0.762478	1.10638
1_UPTAG0745	1	YJR106W	ECM27	UPTAG0745	0.966389	0.918554	0.870948	1.0903
1_UPTAG0746	1	YHL043W	ECM34	UPTAG0746	0.839284	0.764702	0.629704	1.1584
1_UPTAG0748	1	YJL201W	ECM25	UPTAG0748	1.00008	0.877088	0.86062	0.959398
1_UPTAG0750	1	YDR528W	HLR1	UPTAG0750	0.898501	0.959056	0.845469	1.03909
1_UPTAG0751	1	YHR103W	SBE22	UPTAG0751	0.830546	0.973337	0.793163	0.984065
1_UPTAG0752	1	YBL001C	ECM15	UPTAG0752	1.12771	1.04445	1.15564	1.02778
1_UPTAG0753	1	YDR351W	SBE2	UPTAG0753	0.648353	1.29478	0.823649	1.01662
1_UPTAG0754	1	YBR005W	RCR1	UPTAG0754	1.09544	1.06111	1.14047	0.968411
1_UPTAG0755	1	YLR443W	ECM7	UPTAG0755	0.89012	1.03312	0.902269	1.01249
1_UPTAG0756	1	YGR023W	MTL1	UPTAG0756	1.05014	0.82081	0.845717	1.15748
1_UPTAG0758	1	YBR078W	ECM33	UPTAG0758	0.94056	1.08063	0.99724	0.959029
1_UPTAG0759	1	YDR446W	ECM11	UPTAG0759	1.18024	0.824752	0.955053	1.17272
1_UPTAG0760	1	YHR132C	ECM14	UPTAG0760	0.935718	1.09761	1.00769	1.04097
1_UPTAG0761	1	YDR293C	SSD1	UPTAG0761	0.931989	0.886609	0.810733	1.1753
1_UPTAG0762	1	YKL096W	CWP1	UPTAG0762	1.10081	0.903771	0.976125	0.964283
1_UPTAG0763	1	YJL159W	HSP150	UPTAG0763	0.894292	0.866979	0.760718	1.02277
1_UPTAG0764	1	YNL322C	KRE1	UPTAG0764	0.786885	1.6972	1.31033	0.684567
1_UPTAG0765	1	YKL163W	PIR3	UPTAG0765	1.02081	1.0509	1.05254	1.00873
1_UPTAG0767	1	YJL158C	CIS3	UPTAG0767	1.25301	0.840612	1.03344	0.996304
1_UPTAG0768	1	YLR390W-A	CCW14	UPTAG0768	1.31448	0.851964	1.09878	0.956417
1_UPTAG0769	1	YBR067C	TIP1	UPTAG0769	0.922054	0.982939	0.889238	1.06871
1_UPTAG0770	1	YGR032W	GSC2	UPTAG0770	0.806356	0.752924	0.59568	1.25648
1_UPTAG0771	1	YLR342W	FKS1	UPTAG0771	1.2476	0.738556	0.904051	1.18798
1_UPTAG0772	1	YLR433C	CNA1	UPTAG0772	0.963016	0.910365	0.86017	0.988329
1_UPTAG0773	1	YKL190W	CNB1	UPTAG0773	0.824889	1.3739	1.11195	0.973228
1_UPTAG0774	1	YLR300W	EXG1	UPTAG0774	0.777051	2.28451	1.74172	0.636409
1_UPTAG0775	1	YHR143W	DSE2	UPTAG0775	0.633548	1.18441	0.736233	1.0223
1_UPTAG0776	1	YGR143W	SKN1	UPTAG0776	1.30282	0.80122	1.02417	1.11954
1_UPTAG0777	1	YPR159W	KRE6	UPTAG0777	3.30338	0.725535	2.35154	1.33171
1_UPTAG0778	1	YNL090W	RHO2	UPTAG0778	0.799939	0.818238	0.642202	1.09678
1_UPTAG0780	1	YPL053C	KTR6	UPTAG0780	1.01483	0.816597	0.813084	1.08916
1_UPTAG0781	1	YNL029C	KTR5	UPTAG0781	0.874606	0.968408	0.831009	0.95499
1_UPTAG0782	1	YIL085C	KTR7	UPTAG0782	0.918913	1.00682	0.907741	0.962028
1_UPTAG0783	1	YBR205W	KTR3	UPTAG0783	0.959296	1.20021	1.12965	0.95262
1_UPTAG0784	1	YHR030C	SLT2	UPTAG0784	0.96349	1.02266	0.966754	0.948187
1_UPTAG0785	1	YCR017C	CWH43	UPTAG0785	1.06973	0.889221	0.933298	0.92774
1_UPTAG0786	1	YLR110C	CCW12	UPTAG0786	1.23455	1.11659	1.3525	1.00068
1_UPTAG0787	1	YOL109W	ZEO1	UPTAG0787	0.906361	1.09959	0.977836	0.99318
1_UPTAG0788	1	YGR229C	SMI1	UPTAG0788	0.984167	1.2253	1.18317	0.979498
1_UPTAG0789	1	YDR420W	HKR1	UPTAG0789	1.11751	1.04963	1.15086	0.896327
1_UPTAG0790	1	YCL048W	SPS22	UPTAG0790	0.807845	1.01422	0.80389	1.02408
1_UPTAG0791	1	YGL178W	MPT5	UPTAG0791	1.39894	1.10632	1.5185	0.825225
1_UPTAG0793	1	YBL007C	SLA1	UPTAG0793	1.12958	1.12073	1.24209	1.06223
1_UPTAG0795	1	YLR425W	TUS1	UPTAG0795	1.11962	1.09201	1.19959	0.949866
1_UPTAG0796	1	YLR371W	ROM2	UPTAG0796	1.06058	0.946199	0.984603	0.969077
1_UPTAG0797	1	YGR070W	ROM1	UPTAG0797	1.3363	0.797776	1.04597	0.950951
1_UPTAG0798	1	YER155C	BEM2	UPTAG0798	0.878035	0.818742	0.705333	1.15591
1_UPTAG0799	1	YKL096W-A	CWP2	UPTAG0799	1.24703	1.04374	1.27704	0.968049
1_UPTAG0800	1	YKL164C	PIR1	UPTAG0800	1.25542	0.795699	0.980103	1.15653
1_UPTAG0801	1	YGR059W	SPR3	UPTAG0801	1.03797	0.783314	0.797732	1.06828
1_UPTAG0802	1	YDR218C	SPR28	UPTAG0802	1.22803	0.986701	1.18886	0.987696
1_UPTAG0803	1	YJR137C	MET5	UPTAG0803	0.890608	1.0199	0.891205	1.05146
1_UPTAG0804	1	YCL051W	LRE1	UPTAG0804	1.21836	0.893313	1.06786	0.999158
1_UPTAG0805	1	YNL283C	WSC2	UPTAG0805	0.961695	2.06262	1.94622	0.681874
1_UPTAG0806	1	YHL028W	WSC4	UPTAG0806	0.848836	1.08221	0.901299	0.919564
1_UPTAG0807	1	YLR332W	MID2	UPTAG0807	1.03339	1.06888	1.08374	0.94447
1_UPTAG0808	1	YOL105C	WSC3	UPTAG0808	1.11095	2.50881	2.73461	0.696798
1_UPTAG0809	1	YOR008C	SLG1	UPTAG0809	1.10148	0.866784	0.936746	1.1272
1_UPTAG0811	1	YDL223C	HBT1	UPTAG0811	0.815573	1.00593	0.804943	1.00732
1_UPTAG0812	1	YNL325C	FIG4	UPTAG0812	0.903339	1.01639	0.900835	1.04476
1_UPTAG0813	1	YCR089W	FIG2	UPTAG0813	0.935248	0.908519	0.833674	0.960718
1_UPTAG0814	1	YBR040W	FIG1	UPTAG0814	0.959792	0.797597	0.751096	1.07942
1_UPTAG0815	1	YNR032C-A	HUB1	UPTAG0815	0.935591	0.81117	0.744617	1.05749
1_UPTAG0816	1	YAR014C	BUD14	UPTAG0816	1.01823	0.947497	0.946587	0.924458
1_UPTAG0817	1	YHR158C	KEL1	UPTAG0817	0.855922	1.03118	0.865974	0.964105
1_UPTAG0818	1	YNL233W	BNI4	UPTAG0818	1.66261	0.732818	1.19542	1.00127
1_UPTAG0819	1	YMR022W	UBC7	UPTAG0819	1.1902	1.25509	1.46565	0.918032
1_UPTAG0820	1	YGR279C	SCW4	UPTAG0820	1.0006	1.1322	1.11152	0.960611
1_UPTAG0821	1	YMR305C	SCW10	UPTAG0821	1.01265	1.41096	1.40188	0.907425
1_UPTAG0822	1	YGR238C	KEL2	UPTAG0822	1.15337	1.03062	1.16628	1.10392
1_UPTAG0823	1	YBR129C	OPY1	UPTAG0823	1.19674	0.8738	1.026	1.07031
1_UPTAG0824	1	YJL108C	PRM10	UPTAG0824	0.931486	1.31479	1.20162	0.958659
1_UPTAG0825	1	YIL037C	PRM2	UPTAG0825	1.17559	1.04761	1.20835	1.00867
1_UPTAG0826	1	YPL156C	PRM4	UPTAG0826	0.843669	1.13402	0.938702	1.05106
1_UPTAG0827	1	YIL117C	PRM5	UPTAG0827	1.14409	0.783604	0.879612	1.11747
1_UPTAG0828	1	YML047C	PRM6	UPTAG0828	0.987691	0.909352	0.881228	1.02314
1_UPTAG0830	1	YJL170C	ASG7	UPTAG0830	1.1472	1.06017	1.1933	0.889293
1_UPTAG0831	1	YCL027W	FUS1	UPTAG0831	0.693973	1.147	0.780981	0.904864
1_UPTAG0832	1	YKL032C	IXR1	UPTAG0832	2.11972	1.44403	3.00324	0.582985
1_UPTAG0833	1	YOR067C	ALG8	UPTAG0833	1.05774	0.898719	0.932695	0.98159
1_UPTAG0834	1	YMR015C	ERG5	UPTAG0834	1.14525	1.02941	1.15671	0.961175
1_UPTAG0835	1	YLR056W	ERG3	UPTAG0835	1.27359	0.832073	1.03974	1.12023
1_UPTAG0838	1	YGL012W	ERG4	UPTAG0838	1.1506	1.26999	1.43371	0.893779
1_UPTAG0839	1	YML075C	HMG1	UPTAG0839	1.10809	0.9726	1.05742	1.00142
1_UPTAG0840	1	YLR450W	HMG2	UPTAG0840	0.900234	0.884426	0.781181	1.14975
1_UPTAG0841	1	YER044C	ERG28	UPTAG0841	2.16198	0.830863	1.76245	1.24591
1_UPTAG0842	1	YML008C	ERG6	UPTAG0842	0.828895	1.26642	1.02994	0.96057
1_UPTAG0843	1	YOR188W	MSB1	UPTAG0843	1.05607	0.930456	0.9641	1.05413
1_UPTAG0844	1	YPL161C	BEM4	UPTAG0844	1.51643	0.80286	1.19453	1.11501
1_UPTAG0845	1	YML109W	ZDS2	UPTAG0845	1.0259	0.937852	0.94401	0.953075
1_UPTAG0846	1	YGR014W	MSB2	UPTAG0846	1.05314	0.934333	0.96544	0.971579
1_UPTAG0847	1	YBL085W	BOI1	UPTAG0847	0.955003	1.04235	0.976686	0.965705
1_UPTAG0848	1	YER114C	BOI2	UPTAG0848	0.8462	1.42369	1.18202	0.925108
1_UPTAG0849	1	YBR200W	BEM1	UPTAG0849	0.900787	1.12892	0.997748	0.921007
1_UPTAG0850	1	YCR088W	ABP1	UPTAG0850	1.03828	1.22266	1.24553	0.891329
1_UPTAG0851	1	YMR273C	ZDS1	UPTAG0851	0.878669	0.977592	0.842788	0.920457
1_UPTAG0852	1	YPL115C	BEM3	UPTAG0852	1.4202	0.786657	1.09615	1.18752
1_UPTAG0853	1	YHR061C	GIC1	UPTAG0853	1.05955	1.0413	1.08252	1.01088
1_UPTAG0854	1	YDR309C	GIC2	UPTAG0854	0.956575	1.1475	1.07697	0.921943
1_UPTAG0856	1	YAR050W	FLO1	UPTAG0856	1.02843	1.25534	1.26669	0.938793
1_UPTAG0857	1	YKR102W	FLO10	UPTAG0857	0.965103	1.09121	1.03328	1.03438
1_UPTAG0858	1	YHR211W	FLO5	UPTAG0858	0.744249	0.973396	0.710793	0.989359
1_UPTAG0859	1	YAL063C	FLO9	UPTAG0859	0.865872	0.895877	0.761092	0.987518
1_UPTAG0860	1	YLR299W	ECM38	UPTAG0860	1.03419	0.85854	0.871155	0.867245
1_UPTAG0861	1	YPL180W	TCO89	UPTAG0861	0.935511	1.12417	1.03185	1.81203
1_UPTAG0862	1	YJL062W	LAS21	UPTAG0862	1.08688	1.04469	1.11405	1.03159
1_UPTAG0863	1	YOR107W	RGS2	UPTAG0863	0.926479	0.859682	0.781464	1.19273
1_UPTAG0864	1	YKL130C	SHE2	UPTAG0864	1.85084	1.12364	2.04047	0.932699
1_UPTAG0865	1	YAL029C	MYO4	UPTAG0865	1.35642	1.1949	1.59023	0.948873
1_UPTAG0866	1	YBR130C	SHE3	UPTAG0866	2.36188	0.74177	1.71895	1.05568
1_UPTAG0867	1	YML006C	GIS4	UPTAG0867	1.09709	0.857117	0.922611	1.19331
1_UPTAG0868	1	YLR094C	GIS3	UPTAG0868	0.985452	0.798463	0.772015	1.15493
1_UPTAG0870	1	YPL049C	DIG1	UPTAG0870	1.38404	1.12872	1.53275	0.908093
1_UPTAG0871	1	YDR480W	DIG2	UPTAG0871	0.676268	2.55776	1.69713	0.528514
1_UPTAG0872	1	YGR040W	KSS1	UPTAG0872	0.92042	0.964557	0.871062	1.04254
1_UPTAG0873	1	YBR095C	RXT2	UPTAG0873	1.56554	0.969216	1.48874	0.848477
1_UPTAG0874	1	YOR080W	DIA2	UPTAG0874	0.971168	0.975068	0.929105	0.935194
1_UPTAG0875	1	YPL192C	PRM3	UPTAG0875	1.49399	0.883723	1.29539	0.814926
1_UPTAG0876	1	YMR065W	KAR5	UPTAG0876	0.916811	1.16714	1.04988	1.01351
1_UPTAG0877	1	YMR313C	TGL3	UPTAG0877	1.03324	1.01654	1.03053	1.03829
1_UPTAG0879	1	YKL116C	PRR1	UPTAG0879	1.15569	1.03918	1.17833	0.948734
1_UPTAG0881	1	YIL113W	SDP1	UPTAG0881	0.859518	1.08812	0.917625	0.910202
1_UPTAG0882	1	YDR466W	PKH3	UPTAG0882	0.831896	1.05162	0.858348	1.34347
1_UPTAG0883	1	YDL227C	HO	UPTAG0883	0.836408	0.867897	0.712231	1.12418
1_UPTAG0884	1	YMR275C	BUL1	UPTAG0884	1.25389	0.697097	0.857605	1.39669
1_UPTAG0886	1	YOR320C	GNT1	UPTAG0886	1.19999	0.835216	0.983356	0.953723
1_UPTAG0887	1	YGL226C-A	OST5	UPTAG0887	1.0696	0.807014	0.846907	1.00581
1_UPTAG0888	1	YPL227C	ALG5	UPTAG0888	1.20097	2.12275	2.50132	0.830498
1_UPTAG0889	1	YJR131W	MNS1	UPTAG0889	1.48505	0.820154	1.19501	0.766819
1_UPTAG0890	1	YBR199W	KTR4	UPTAG0890	1.33455	0.83877	1.09828	1.08698
1_UPTAG0891	1	YEL036C	ANP1	UPTAG0891	1.172	0.797662	0.917235	1.1467
1_UPTAG0893	1	YML115C	VAN1	UPTAG0893	1.49846	0.769279	1.13101	1.24128
1_UPTAG0895	1	YGR227W	DIE2	UPTAG0895	0.815932	1.45477	1.16461	0.94212
1_UPTAG0896	1	YKR061W	KTR2	UPTAG0896	0.897508	0.84466	0.743798	1.14951
1_UPTAG0897	1	YJL139C	YUR1	UPTAG0897	1.23937	0.972862	1.18301	1.04674
1_UPTAG0898	1	YGR036C	CAX4	UPTAG0898	2.80788	0.677499	1.86648	1.35592
1_UPTAG0899	1	YGL257C	MNT2	UPTAG0899	0.917342	0.940585	0.846573	1.05333
1_UPTAG0900	1	YIL014W	MNT3	UPTAG0900	0.963336	1.06048	1.00234	1.04932
1_UPTAG0901	1	YNR059W	MNT4	UPTAG0901	1.29006	0.778787	0.985745	1.09808
1_UPTAG0902	1	YAL023C	PMT2	UPTAG0902	0.853561	1.01917	0.853524	1.02086
1_UPTAG0903	1	YOR321W	PMT3	UPTAG0903	1.23265	0.995057	1.20343	0.86675
1_UPTAG0904	1	YJR143C	PMT4	UPTAG0904	1.01881	1.0059	1.00551	0.989133
1_UPTAG0905	1	YDL093W	PMT5	UPTAG0905	0.77509	1.8764	1.42697	0.645787
1_UPTAG0906	1	YGR199W	PMT6	UPTAG0906	0.837328	1.02285	0.840314	0.939169
1_UPTAG0907	1	YDL095W	PMT1	UPTAG0907	1.4769	0.709117	1.02755	1.09433
1_UPTAG0908	1	YDR483W	KRE2	UPTAG0908	0.734933	2.03039	1.46407	0.656186
1_UPTAG0909	1	YOR099W	KTR1	UPTAG0909	0.853981	0.924467	0.774596	0.946607
1_UPTAG0910	1	YER001W	MNN1	UPTAG0910	1.1231	0.8092	0.891681	1.03597
1_UPTAG0911	1	YBR260C	RGD1	UPTAG0911	0.817086	1.51917	1.2179	0.84791
1_UPTAG0912	1	YLR006C	SSK1	UPTAG0912	1.36337	1.50775	2.01687	0.654394
1_UPTAG0913	1	YOR219C	STE13	UPTAG0913	0.837619	0.868605	0.713846	1.0916
1_UPTAG0914	1	YJR117W	STE24	UPTAG0914	0.891466	1.00724	0.880995	0.999505
1_UPTAG0916	1	YLR133W	CKI1	UPTAG0916	0.657936	0.949242	0.612768	1.18725
1_UPTAG0917	1	YNL130C	CPT1	UPTAG0917	0.887228	0.829834	0.722374	1.14347
1_UPTAG0918	1	YGR157W	CHO2	UPTAG0918	1.15769	0.909839	1.03346	0.864289
1_UPTAG0919	1	YJR073C	OPI3	UPTAG0919	0.856939	1.00169	0.84221	1.02705
1_UPTAG0920	1	YNL169C	PSD1	UPTAG0920	0.865997	1.18212	1.00441	0.958594
1_UPTAG0921	1	YGR202C	PCT1	UPTAG0921	0.672242	0.980562	0.646749	1.07255
1_UPTAG0923	1	YOL011W	PLB3	UPTAG0923	1.17542	1.4883	1.71641	0.917581
1_UPTAG0924	1	YBR042C	CST26	UPTAG0924	1.04954	1.93978	1.99749	0.798134
1_UPTAG0926	1	YBL011W	SCT1	UPTAG0926	0.89603	0.972624	0.855072	0.928461
1_UPTAG0927	1	YPR140W	TAZ1	UPTAG0927	1.05719	0.865493	0.897746	0.910236
1_UPTAG0928	1	YGL126W	SCS3	UPTAG0928	1.07751	0.761315	0.804859	1.13921
1_UPTAG0929	1	YBR030W	RKM3	UPTAG0929	1.21718	0.913956	1.09147	0.980425
1_UPTAG0930	1	YDR503C	LPP1	UPTAG0930	0.862531	0.927623	0.785022	1.18018
1_UPTAG0931	1	YNL279W	PRM1	UPTAG0931	0.87795	1.84271	1.58731	0.882271
1_UPTAG0932	1	YMR232W	FUS2	UPTAG0932	1.23771	0.788026	0.95696	1.09827
1_UPTAG0933	1	YNL053W	MSG5	UPTAG0933	0.945206	0.869714	0.806562	1.02973
1_UPTAG0934	1	YDR075W	PPH3	UPTAG0934	0.77427	1.031	0.783225	0.992963
1_UPTAG0935	1	YDL006W	PTC1	UPTAG0935	1.52729	0.760111	1.13903	1.09127
1_UPTAG0936	1	YBL056W	PTC3	UPTAG0936	0.661898	1.79215	1.16386	0.867605
1_UPTAG0937	1	YER075C	PTP3	UPTAG0937	0.879544	3.25929	2.81265	0.696984
1_UPTAG0939	1	YNL048W	ALG11	UPTAG0939	1.12529	1.01936	1.12546	1.05085
1_UPTAG0940	1	YBR015C	MNN2	UPTAG0940	1.41547	1.00904	1.40133	0.975636
1_UPTAG0941	1	YJL186W	MNN5	UPTAG0941	0.916497	1.27134	1.14322	0.957163
1_UPTAG0943	1	YEL042W	GDA1	UPTAG0943	0.986883	1.02856	0.995937	0.947368
1_UPTAG0944	1	YER005W	YND1	UPTAG0944	1.14317	1.04374	1.17068	0.947976
1_UPTAG0945	1	YMR101C	SRT1	UPTAG0945	0.87757	1.17277	1.00979	0.97448
1_UPTAG0946	1	YBL082C	ALG3	UPTAG0946	1.01919	1.17185	1.17182	0.853363
1_UPTAG0947	1	YNR030W	ALG12	UPTAG0947	0.958558	1.0324	0.970964	0.919379
1_UPTAG0948	1	YEL031W	SPF1	UPTAG0948	1.43386	0.841478	1.18382	1.07814
1_UPTAG0949	1	YNL219C	ALG9	UPTAG0949	1.01563	1.17274	1.16862	0.940955
1_UPTAG0950	1	YOR002W	ALG6	UPTAG0950	1.1217	1.84258	2.02786	0.849175
1_UPTAG0951	1	YHR082C	KSP1	UPTAG0951	0.846079	1.04624	0.868515	1.01437
1_UPTAG0952	1	YER027C	GAL83	UPTAG0952	0.923784	1.38074	1.25146	0.916253
1_UPTAG0953	1	YOL016C	CMK2	UPTAG0953	1.62145	0.771936	1.22806	0.891291
1_UPTAG0954	1	YFR014C	CMK1	UPTAG0954	1.84918	1.0331	1.87437	0.958697
1_UPTAG0955	1	YHR135C	YCK1	UPTAG0955	1.06234	1.11954	1.16692	0.939377
1_UPTAG0956	1	YNL154C	YCK2	UPTAG0956	0.941545	0.977568	0.903074	1.02171
1_UPTAG0957	1	YNL307C	MCK1	UPTAG0957	1.04009	0.948216	0.96764	0.970307
1_UPTAG0958	1	YBL016W	FUS3	UPTAG0958	1.00949	1.43621	1.42251	0.822341
1_UPTAG0959	1	YLR113W	HOG1	UPTAG0959	1.11538	0.789721	0.864236	1.22567
1_UPTAG0960	1	YPR054W	SMK1	UPTAG0960	1.03594	0.831084	0.844724	1.18133
1_UPTAG0961	1	YOR231W	MKK1	UPTAG0961	0.883166	1.10636	0.958682	1.10378
1_UPTAG0963	1	YPL140C	MKK2	UPTAG0963	0.958597	1.00508	0.945306	0.932536
1_UPTAG0964	1	YCR073C	SSK22	UPTAG0964	0.9531	1.34676	1.2594	0.895968
1_UPTAG0966	1	YNR031C	SSK2	UPTAG0966	1.07892	1.09899	1.16337	1.00103
1_UPTAG0967	1	YJL095W	BCK1	UPTAG0967	0.933605	0.854976	0.783163	1.05029
1_UPTAG0969	1	YNL298W	CLA4	UPTAG0969	1.03136	0.870426	0.880802	1.08524
1_UPTAG0970	1	YNL020C	ARK1	UPTAG0970	0.726769	1.13543	0.809638	0.929841
1_UPTAG0971	1	YOL113W	SKM1	UPTAG0971	1.19784	1.11304	1.30811	0.999365
1_UPTAG0972	1	YGR262C	BUD32	UPTAG0972	0.990882	1.0622	1.03267	1.05441
1_UPTAG0973	1	YDR523C	SPS1	UPTAG0973	1.04391	1.14966	1.17751	0.962991
1_UPTAG0975	1	YJL164C	TPK1	UPTAG0975	1.03181	0.869963	0.880711	1.01881
1_UPTAG0976	1	YPL203W	TPK2	UPTAG0976	1.4082	1.06725	1.47457	0.722829
1_UPTAG0977	1	YKL166C	TPK3	UPTAG0977	1.04994	1.12786	1.16186	1.02833
1_UPTAG0979	1	YIL015W	BAR1	UPTAG0979	0.829713	0.911419	0.741961	1.10861
1_UPTAG0980	1	YOR003W	YSP3	UPTAG0980	0.867387	1.15935	0.98665	0.856197
1_UPTAG0981	1	YHL030W	ECM29	UPTAG0981	1.41866	0.763683	1.06298	0.951878
1_UPTAG0982	1	YHR184W	SSP1	UPTAG0982	1.00204	1.13263	1.11354	0.899485
1_UPTAG0983	1	YDL239C	ADY3	UPTAG0983	1.07187	1.31686	1.3849	0.968277
1_UPTAG0984	1	YOR124C	UBP2	UPTAG0984	0.929626	0.852319	0.777402	1.12938
1_UPTAG0985	1	YER151C	UBP3	UPTAG0985	1.09771	1.31686	1.41828	0.920589
1_UPTAG0986	1	YKL117W	SBA1	UPTAG0986	1.10535	0.899521	0.97554	0.926834
1_UPTAG0987	1	YPL106C	SSE1	UPTAG0987	1.72149	0.836074	1.41216	0.952465
1_UPTAG0988	1	YMR214W	SCJ1	UPTAG0988	0.84868	1.06101	0.883482	1.03842
1_UPTAG0989	1	YML111W	BUL2	UPTAG0989	0.976547	0.91041	0.872298	0.948734
1_UPTAG0990	1	YJR036C	HUL4	UPTAG0990	0.821811	1.41864	1.14387	0.937031
1_UPTAG0991	1	YGL141W	HUL5	UPTAG0991	0.525632	3.84143	1.98112	0.482868
1_UPTAG0993	1	YLR389C	STE23	UPTAG0993	0.878305	0.988366	0.851723	1.02628
1_UPTAG0994	1	YDR251W	PAM1	UPTAG0994	0.902904	0.906713	0.803242	0.985725
1_UPTAG0996	1	YPL021W	ECM23	UPTAG0996	0.896871	0.855782	0.753058	1.07433
1_UPTAG0997	1	YOR032C	HMS1	UPTAG0997	0.828174	1.19449	0.9706	0.911216
1_UPTAG0998	1	YMR016C	SOK2	UPTAG0998	1.01058	1.13546	1.12584	0.889267
1_UPTAG0999	1	YDL024C	DIA3	UPTAG0999	0.841791	0.844723	0.697676	0.969272
1_UPTAG1000	1	YDL035C	GPR1	UPTAG1000	0.801806	1.02374	0.805366	0.948066
1_UPTAG1001	1	YMR238W	DFG5	UPTAG1001	0.913231	1.69987	1.52311	0.758656
1_UPTAG1002	1	YLR353W	BUD8	UPTAG1002	1.07684	1.1016	1.16388	0.827833
1_UPTAG1003	1	YMR316W	DIA1	UPTAG1003	1.02549	0.99348	0.999602	0.987252
1_UPTAG1004	1	YIR019C	FLO11	UPTAG1004	1.00209	1.0943	1.07592	0.949986
1_UPTAG1005	1	YER118C	SHO1	UPTAG1005	1.10544	0.956484	1.0374	0.996908
1_UPTAG1007	1	YJR153W	PGU1	UPTAG1007	1.05158	1.13865	1.17481	0.998275
1_UPTAG1008	1	YCR038C	BUD5	UPTAG1008	1.27685	1.20092	1.50449	0.867616
1_UPTAG1009	1	YER109C	FLO8	UPTAG1009	0.738083	1.07817	0.780781	0.940209
1_UPTAG1010	1	YMR164C	MSS11	UPTAG1010	0.989916	0.831902	0.80799	1.02685
1_UPTAG1011	1	YBR083W	TEC1	UPTAG1011	0.884903	1.20803	1.04884	0.966885
1_UPTAG1013	1	YOL081W	IRA2	UPTAG1013	1.16113	0.988839	1.12653	0.82569
1_UPTAG1014	1	YLL016W	SDC25	UPTAG1014	0.782654	1.3151	1.00987	0.956242
1_UPTAG1016	1	YMR172W	HOT1	UPTAG1016	1.03437	1.15837	1.1756	0.952913
1_UPTAG1018	1	YDR496C	PUF6	UPTAG1018	1.03958	1.54899	1.57994	0.730146
1_UPTAG1019	1	YCR097W	HMRA1	UPTAG1019	0.92151	1.31929	1.19282	0.910722
1_UPTAG1020	1	YOR129C	AFI1	UPTAG1020	1.01387	1.3723	1.3651	0.864786
1_UPTAG1021	1	YPL004C	LSP1	UPTAG1021	1.01112	1.67508	1.66178	0.89152
1_UPTAG1022	1	YDR162C	NBP2	UPTAG1022	0.799297	1.45972	1.14475	0.696241
1_UPTAG1024	1	YMR175W	SIP18	UPTAG1024	1.00946	1.41818	1.40461	1.04728
1_UPTAG1025	1	YMR092C	AIP1	UPTAG1025	0.771041	1.09228	0.826314	0.9612
1_UPTAG1026	1	YPL152W	RRD2	UPTAG1026	0.911656	1.1065	0.989729	1.13107
1_UPTAG1028	1	YKL026C	GPX1	UPTAG1028	1.03	1.05036	1.06147	0.996736
1_UPTAG1029	1	YBR244W	GPX2	UPTAG1029	0.973601	0.994655	0.950142	1.12619
1_UPTAG1030	1	YPL196W	OXR1	UPTAG1030	0.930175	1.23206	1.12443	0.814998
1_UPTAG1031	1	YCL033C	MXR2	UPTAG1031	0.422859	2.952	1.22475	0.472226
1_UPTAG1032	1	YER042W	MXR1	UPTAG1032	1.20654	0.859172	1.01708	1.06129
1_UPTAG1033	1	YIR037W	HYR1	UPTAG1033	0.79108	0.956116	0.742107	1.0897
1_UPTAG1034	1	YER174C	GRX4	UPTAG1034	0.8577	1.18878	1.0004	0.952056
1_UPTAG1035	1	YDR098C	GRX3	UPTAG1035	0.60767	1.6561	0.987392	0.563715
1_UPTAG1036	1	YCL035C	GRX1	UPTAG1036	1.02887	1.0422	1.05208	0.92486
1_UPTAG1037	1	YFL026W	STE2	UPTAG1037	0.820269	6.56266	5.28167	0.521063
1_UPTAG1038	1	YNL091W	NST1	UPTAG1038	1.43814	1.00891	1.4236	1.07568
1_UPTAG1039	1	YER019W	ISC1	UPTAG1039	1.01116	0.909582	0.902396	1.01679
1_UPTAG1040	1	YNR074C	AIF1	UPTAG1040	1.12689	0.663698	0.733816	0.35681
1_UPTAG1041	1	YOR010C	TIR2	UPTAG1041	0.93864	0.9898	0.911552	1.0042
1_UPTAG1042	1	YOR324C	FRT1	UPTAG1042	0.993419	1.57172	1.53194	0.751892
1_UPTAG1043	1	YAL028W	FRT2	UPTAG1043	0.784805	0.94083	0.724449	1.02917
1_UPTAG1044	1	YGR234W	YHB1	UPTAG1044	0.80511	2.31065	1.82525	0.644225
1_UPTAG1045	1	YOL151W	GRE2	UPTAG1045	0.625785	0.821995	0.504696	1.14226
1_UPTAG1046	1	YER011W	TIR1	UPTAG1046	1.11243	0.718339	0.78404	1.07259
1_UPTAG1047	1	YPL240C	HSP82	UPTAG1047	1.00063	1.08393	1.06417	0.995919
1_UPTAG1048	1	YIL033C	BCY1	UPTAG1048	1.09481	0.952339	1.02297	1.06975
1_UPTAG1049	1	YDR017C	KCS1	UPTAG1049	0.695588	0.889181	0.606844	1.32659
1_UPTAG1050	1	YNL160W	YGP1	UPTAG1050	0.878555	0.904835	0.779962	1.06445
1_UPTAG1051	1	YPL223C	GRE1	UPTAG1051	0.959545	1.22005	1.14862	0.959094
1_UPTAG1052	1	YDR184C	ATC1	UPTAG1052	0.906383	1.01069	0.898802	1.00679
1_UPTAG1053	1	YBR082C	UBC4	UPTAG1053	1.98548	1.13559	2.21218	1.05939
1_UPTAG1054	1	YDR171W	HSP42	UPTAG1054	0.933819	1.0147	0.929688	1.03175
1_UPTAG1055	1	YHL048W	COS8	UPTAG1055	0.951209	1.7101	1.596	0.87807
1_UPTAG1057	1	YPR040W	TIP41	UPTAG1057	1.29493	1.18479	1.50529	1.05337
1_UPTAG1058	1	YIL047C	SYG1	UPTAG1058	1.39327	1.12325	1.53549	0.649371
1_UPTAG1059	1	YBR077C	SLM4	UPTAG1059	1.55262	0.732135	1.1153	1.42591
1_UPTAG1060	1	YGL121C	GPG1	UPTAG1060	0.931514	0.819226	0.748736	1.07992
1_UPTAG1061	1	YOR371C	GPB1	UPTAG1061	1.00694	0.979708	0.967914	0.886799
1_UPTAG1066	1	YNL145W	MFA2	UPTAG1066	0.941541	1.16675	1.07784	0.936165
1_UPTAG1069	1	YNL173C	MDG1	UPTAG1069	1.01039	1.09983	1.09031	0.879498
1_UPTAG1072	1	YDR085C	AFR1	UPTAG1072	1.02387	1.01214	1.01676	0.97974
1_UPTAG1074	1	YDR284C	DPP1	UPTAG1074	0.976363	1.36155	1.30431	0.915762
1_UPTAG1075	1	YFL047W	RGD2	UPTAG1075	1.07788	0.834249	0.882266	1.0616
1_UPTAG1076	1	YOR134W	BAG7	UPTAG1076	1.12091	0.807278	0.887826	1.018
1_UPTAG1077	1	YDL240W	LRG1	UPTAG1077	1.04165	0.938877	0.959543	1.06004
1_UPTAG1078	1	YDR389W	SAC7	UPTAG1078	1.47105	0.696515	1.00529	1.09531
1_UPTAG1079	1	YDR403W	DIT1	UPTAG1079	1.05165	0.811708	0.837542	1.0937
1_UPTAG1080	1	YDR402C	DIT2	UPTAG1080	1.04459	1.07297	1.09969	0.992059
1_UPTAG1081	1	YLR307W	CDA1	UPTAG1081	1.21089	0.773656	0.919154	1.16748
1_UPTAG1082	1	YLR308W	CDA2	UPTAG1082	1.1012	1.64086	1.77285	0.820437
1_UPTAG1084	1	YHR185C	PFS1	UPTAG1084	0.803809	1.13276	0.893357	1.07746
1_UPTAG1085	1	YDR104C	SPO71	UPTAG1085	0.879974	0.822802	0.710395	1.13279
1_UPTAG1086	1	YHR139C	SPS100	UPTAG1086	1.09176	0.90421	0.96857	1.27674
1_UPTAG1087	1	YOR242C	SSP2	UPTAG1087	1.34061	0.701663	0.922925	1.02142
1_UPTAG1088	1	YBR045C	GIP1	UPTAG1088	1.11192	0.817445	0.891802	1.06924
1_UPTAG1089	1	YOR298W	MUM3	UPTAG1089	1.10757	1.40467	1.52644	0.927106
1_UPTAG1090	1	YDR260C	SWM1	UPTAG1090	0.904783	0.933202	0.828429	1.00928
1_UPTAG1091	1	YNL204C	SPS18	UPTAG1091	0.657194	1.03921	0.670085	0.856707
1_UPTAG1092	1	YER132C	PMD1	UPTAG1092	0.940768	0.854254	0.788506	0.955552
1_UPTAG1093	1	YOR190W	SPR1	UPTAG1093	1.01722	1.0493	1.04724	0.804169
1_UPTAG1094	1	YMR063W	RIM9	UPTAG1094	1.06542	0.994399	1.03948	1.04078
1_UPTAG1095	1	YHR153C	SPO16	UPTAG1095	0.896846	0.887186	0.78067	1.08187
1_UPTAG1096	1	YER115C	SPR6	UPTAG1096	1.1996	0.910142	1.07122	1.25718
1_UPTAG1097	1	YIL099W	SGA1	UPTAG1097	0.874818	1.02188	0.877107	1.09451
1_UPTAG1099	1	YNL098C	RAS2	UPTAG1099	1.12516	1.05852	1.16855	1.00177
1_UPTAG1100	1	YGR225W	AMA1	UPTAG1100	1.0662	1.38225	1.44597	0.901414
1_UPTAG1101	1	YDR522C	SPS2	UPTAG1101	1.06859	1.04499	1.09562	1.11386
1_UPTAG1102	1	YNL294C	RIM21	UPTAG1102	1.19696	1.05444	1.23833	1.02449
1_UPTAG1103	1	YOR313C	SPS4	UPTAG1103	0.801286	1.38091	1.08564	0.962853
1_UPTAG1104	1	YBL058W	SHP1	UPTAG1104	1.49026	1.19236	1.74343	1.10703
1_UPTAG1105	1	YAL009W	SPO7	UPTAG1105	0.911519	1.09685	0.980956	0.969072
1_UPTAG1106	1	YLR341W	SPO77	UPTAG1106	1.30805	0.856152	1.09878	0.987674
1_UPTAG1107	1	YHR004C	NEM1	UPTAG1107	0.744299	1.18312	0.863993	1.02751
1_UPTAG1108	1	YER177W	BMH1	UPTAG1108	1.03121	1.00272	1.01452	0.955916
1_UPTAG1109	1	YDR099W	BMH2	UPTAG1109	0.891014	1.70291	1.48871	0.817747
1_UPTAG1110	1	YIR026C	YVH1	UPTAG1110	1.03033	0.975204	0.985844	1.07667
1_UPTAG1111	1	YGL181W	GTS1	UPTAG1111	0.756499	1.92708	1.43035	0.809401
1_UPTAGbre1KO	1	BRE1_Plate1	BRE1	UPTAGbre1KO	0.12742	1.24911	0.156162	0.86947
1_UPTAGdot1KO	1	DOT1_Plate1	DOT1	UPTAGdot1KO	1.03128	0.535931	0.542276	0.483179
1_UPTAGDot1OE	1	DOT1OE_Plate1	DOT1OE	UPTAGDot1OE	14.6216	0.310658	4.45668	1.11443
2_UPTAG0001	2	YOL043C	NTG2	UPTAG0001	1.01623	1.06466	1.02929	0.992418
2_UPTAG0002	2	YDR183W	PLP1	UPTAG0002	1.22042	0.839195	0.974331	1.27838
2_UPTAG0003	2	YJL218W	YJL218W	UPTAG0003	1.00714	0.855715	0.819884	1.09855
2_UPTAG0004	2	YEL052W	AFG1	UPTAG0004	0.935308	1.06004	0.943213	0.942674
2_UPTAG0005	2	YPL074W	YTA6	UPTAG0005	0.95433	0.969499	0.880195	1.01242
2_UPTAG0006	2	YDR061W	YDR061W	UPTAG0006	0.609916	1.74241	1.01101	0.855131
2_UPTAG0007	2	YOL141W	PPM2	UPTAG0007	0.94143	0.895405	0.801938	0.957669
2_UPTAG0008	2	YJL084C	ALY2	UPTAG0008	0.828503	1.00572	0.792688	0.932908
2_UPTAG0009	2	YGR163W	GTR2	UPTAG0009	0.977064	1.33098	1.23717	1.10112
2_UPTAG0010	2	YLR289W	GUF1	UPTAG0010	1.01391	1.06879	1.03092	1.03102
2_UPTAG0011	2	YDR291W	HRQ1	UPTAG0011	1.0666	1.22985	1.24792	0.95897
2_UPTAG0012	2	YFR038W	IRC5	UPTAG0012	1.03581	0.914167	0.900823	1.05261
2_UPTAG0013	2	YLR419W	YLR419W	UPTAG0013	0.965684	1.02766	0.944102	0.960233
2_UPTAG0014	2	YLR118C	YLR118C	UPTAG0014	1.09527	0.856202	0.892132	1.08377
2_UPTAG0015	2	YJR107W	YJR107W	UPTAG0015	0.676189	1.38179	0.88888	0.937387
2_UPTAG0016	2	YFL061W	DDI2	UPTAG0016	0.746516	0.824336	0.585432	1.07886
2_UPTAG0017	2	YPL189W	GUP2	UPTAG0017	0.727693	0.948427	0.656576	1.08697
2_UPTAG0018	2	YJR138W	IML1	UPTAG0018	0.839106	1.08817	0.868654	0.920862
2_UPTAG0019	2	YPL024W	RMI1	UPTAG0019	1.3942	0.822458	1.09087	1.21641
2_UPTAG0020	2	YDR383C	NKP1	UPTAG0020	0.757393	1.11035	0.800045	1.06113
2_UPTAG0021	2	YLR315W	NKP2	UPTAG0021	1.03068	0.914254	0.89644	1.1416
2_UPTAG0022	2	YBR233W	PBP2	UPTAG0022	1.09609	0.932929	0.972809	1.05688
2_UPTAG0023	2	YFR023W	PES4	UPTAG0023	0.744307	0.952827	0.674682	0.982631
2_UPTAG0024	2	YOR104W	PIN2	UPTAG0024	0.728083	1.22225	0.846591	1.04815
2_UPTAG0025	2	YDR505C	PSP1	UPTAG0025	0.935463	0.789507	0.702612	1.1597
2_UPTAG0026	2	YNL201C	PSY2	UPTAG0026	0.864784	0.871044	0.716606	1.06197
2_UPTAG0027	2	YDL001W	RMD1	UPTAG0027
2_UPTAG0028	2	YHL023C	NPR3	UPTAG0028	1.09234	0.833622	0.866282	0.918133
2_UPTAG0029	2	YEL072W	RMD6	UPTAG0029	0.80392	1.11791	0.854974	0.957525
2_UPTAG0030	2	YFR048W	RMD8	UPTAG0030	0.866046	0.980606	0.80792	1.18885
2_UPTAG0031	2	YMR266W	RSN1	UPTAG0031	0.789172	1.28143	0.962051	1.07623
2_UPTAG0032	2	YGL056C	SDS23	UPTAG0032	0.939242	0.984633	0.879802	0.971757
2_UPTAG0033	2	YBL031W	SHE1	UPTAG0033	1.13674	0.826127	0.893388	1.04733
2_UPTAG0034	2	YGL228W	SHE10	UPTAG0034	0.980311	1.39654	1.30242	0.910338
2_UPTAG0035	2	YLR187W	SKG3	UPTAG0035	1.087	1.1163	1.15436	0.911005
2_UPTAG0036	2	YIL011W	TIR3	UPTAG0036	1.00675	0.936981	0.897395	1.05221
2_UPTAG0037	2	YEL038W	UTR4	UPTAG0037	0.970082	1.20624	1.1132	0.882131
2_UPTAG0038	2	YNL212W	VID27	UPTAG0038	1.09236	0.921277	0.957394	1.18159
2_UPTAG0039	2	YPL239W	YAR1	UPTAG0039	1.07237	0.907911	0.926233	0.936677
2_UPTAG0040	2	YGL060W	YBP2	UPTAG0040	1.07076	1.02038	1.03941	1.00884
2_UPTAG0041	2	YBR094W	PBY1	UPTAG0041	1.00564	0.967653	0.92575	1.00617
2_UPTAG0042	2	YBR108W	AIM3	UPTAG0042	0.886082	1.16651	0.98332	0.982935
2_UPTAG0045	2	YBR284W	YBR284W	UPTAG0045	0.986377	1.12991	1.06028	0.821454
2_UPTAG0046	2	YDL114W	YDL114W	UPTAG0046	1.0602	1.01384	1.02257	0.928521
2_UPTAG0047	2	YDR249C	YDR249C	UPTAG0047	0.870164	1.14588	0.948575	0.954304
2_UPTAG0049	2	YEL041W	YEF1	UPTAG0049	0.954781	0.941331	0.855025	1.08108
2_UPTAG0050	2	YER066W	RRT13	UPTAG0050	1.089	0.824599	0.85429	0.995266
2_UPTAG0051	2	YGL242C	YGL242C	UPTAG0051	0.951633	0.876736	0.793728	1.00946
2_UPTAG0052	2	YGR126W	YGR126W	UPTAG0052	1.07148	0.916124	0.933834	1.00076
2_UPTAG0054	2	YJL149W	DAS1	UPTAG0054	0.927761	0.969579	0.855761	1.02742
2_UPTAG0055	2	YJR142W	YJR142W	UPTAG0055	0.83993	1.10909	0.88622	0.999943
2_UPTAG0056	2	YKL056C	TMA19	UPTAG0056	0.782115	1.06402	0.791686	1.04933
2_UPTAG0057	2	YKL151C	YKL151C	UPTAG0057	0.959277	1.05478	0.962586	1.0882
2_UPTAG0058	2	YLL007C	LMO1	UPTAG0058	0.971289	0.846233	0.781936	1.16713
2_UPTAG0059	2	YLL049W	LDB18	UPTAG0059	1.11478	1.10151	1.16818	1.05141
2_UPTAG0060	2	YLR179C	YLR179C	UPTAG0060
2_UPTAG0061	2	YLR218C	COA4	UPTAG0061	1.39563	0.983042	1.3052	0.967863
2_UPTAG0062	2	YLR254C	NDL1	UPTAG0062	1.10202	0.895726	0.939072	0.942152
2_UPTAG0063	2	YLR352W	YLR352W	UPTAG0063	0.636244	1.81026	1.09571	0.868664
2_UPTAG0064	2	YMR262W	YMR262W	UPTAG0064	1.06648	0.922893	0.93635	0.954559
2_UPTAG0065	2	YOL111C	MDY2	UPTAG0065	0.985555	0.923754	0.866104	1.00088
2_UPTAG0066	2	YOL161C	PAU20	UPTAG0066	0.830745	1.02433	0.809547	0.975853
2_UPTAG0067	2	YOR296W	YOR296W	UPTAG0067	0.834645	0.967851	0.768498	1.05768
2_UPTAG0068	2	YOR322C	LDB19	UPTAG0068	1.23163	0.888636	1.04121	0.928423
2_UPTAG0069	2	YOR378W	AMF1	UPTAG0069	1.03037	0.896409	0.878679	0.924287
2_UPTAG0070	2	YPL066W	RGL1	UPTAG0070	0.947371	0.960022	0.865235	1.10193
2_UPTAG0071	2	YPL144W	POC4	UPTAG0071	0.904044	0.66962	0.575905	1.2572
2_UPTAG0075	2	YPR106W	ISR1	UPTAG0075	1.40479	0.693681	0.927052	0.795872
2_UPTAG0077	2	YBR125C	PTC4	UPTAG0077	0.830333	0.916004	0.723574	1.05649
2_UPTAG0078	2	YGR203W	YCH1	UPTAG0078	0.938002	1.01858	0.908932	0.955062
2_UPTAG0079	2	YPL176C	TRE1	UPTAG0079	0.986742	0.762892	0.716143	1.04352
2_UPTAG0080	2	YJR129C	EFM3	UPTAG0080	1.17821	0.90407	1.01334	0.723489
2_UPTAG0081	2	YPL017C	IRC15	UPTAG0081	0.883399	0.959205	0.806124	1.09226
2_UPTAG0082	2	YDR501W	PLM2	UPTAG0082	1.0092	0.911483	0.875107	0.894512
2_UPTAG0083	2	YLR183C	TOS4	UPTAG0083	0.894881	1.09533	0.932492	1.01173
2_UPTAG0084	2	YGL096W	TOS8	UPTAG0084	1.14274	1.22037	1.32671	1.10008
2_UPTAG0085	2	YNR048W	YNR048W	UPTAG0085	0.911694	0.862728	0.748266	1.06129
2_UPTAG0086	2	YJL197W	UBP12	UPTAG0086	1.05605	1.04987	1.05476	1.00354
2_UPTAG0087	2	YBL067C	UBP13	UPTAG0087	0.667745	1.14403	0.726744	1.16917
2_UPTAG0088	2	YAL020C	ATS1	UPTAG0088	1.1927	0.911783	1.03456	1.02224
2_UPTAG0089	2	YKR048C	NAP1	UPTAG0089	1.02813	0.910343	0.8904	0.885025
2_UPTAG0090	2	YKL110C	KTI12	UPTAG0090	1.46801	0.912601	1.27451	1.03038
2_UPTAG0092	2	YNL289W	PCL1	UPTAG0092	0.952855	0.794398	0.720108	0.882637
2_UPTAG0093	2	YDL127W	PCL2	UPTAG0093	1.05421	1.02238	1.02535	0.977287
2_UPTAG0094	2	YHR071W	PCL5	UPTAG0094	1.18209	1.09064	1.22649	0.919643
2_UPTAG0095	2	YDL179W	PCL9	UPTAG0095	0.725593	1.39799	0.965004	1.03423
2_UPTAG0097	2	YMR052W	FAR3	UPTAG0097	1.04975	1.03651	1.03512	1.00697
2_UPTAG0098	2	YPR075C	OPY2	UPTAG0098	1.17997	0.943699	1.05935	0.971385
2_UPTAG0099	2	YKL160W	ELF1	UPTAG0099	1.07703	1.35752	1.39095	0.913287
2_UPTAG0100	2	YPL089C	RLM1	UPTAG0100	0.80398	1.03562	0.792095	1.07442
2_UPTAG0102	2	YKL129C	MYO3	UPTAG0102	0.741906	1.35951	0.959542	0.974099
2_UPTAG0103	2	YMR109W	MYO5	UPTAG0103	0.747537	0.955804	0.679727	1.04231
2_UPTAG0104	2	YPR030W	CSR2	UPTAG0104	1.05848	0.922122	0.928546	0.928912
2_UPTAG0105	2	YMR234W	RNH1	UPTAG0105	0.986636	1.30922	1.22886	1.05257
2_UPTAG0106	2	YJL042W	MHP1	UPTAG0106	0.920438	0.949819	0.831704	0.982621
2_UPTAG0107	2	YOR191W	ULS1	UPTAG0107	0.847073	1.04643	0.843261	0.880541
2_UPTAG0108	2	YMR284W	YKU70	UPTAG0108	1.35902	1.06868	1.38168	0.971851
2_UPTAG0109	2	YMR106C	YKU80	UPTAG0109	1.07816	0.9217	0.945381	1.05641
2_UPTAG0111	2	YNL097C	PHO23	UPTAG0111	1.59947	0.905678	1.37811	0.934991
2_UPTAG0112	2	YBR245C	ISW1	UPTAG0112	0.840072	1.05629	0.844179	0.942152
2_UPTAG0113	2	YGR056W	RSC1	UPTAG0113	0.847456	1.00644	0.811405	1.03514
2_UPTAG0114	2	YFR013W	IOC3	UPTAG0114	0.905047	1.108	0.953992	1.0031
2_UPTAG0115	2	YOR304W	ISW2	UPTAG0115	0.827853	1.11211	0.87586	1.04306
2_UPTAG0116	2	YGL163C	RAD54	UPTAG0116	1.89423	0.88933	1.60261	1.12758
2_UPTAG0118	2	YOL017W	ESC8	UPTAG0118	0.957795	1.09036	0.993518	0.93649
2_UPTAG0119	2	YDR181C	SAS4	UPTAG0119	0.803375	1.0336	0.789961	0.886448
2_UPTAG0120	2	YOR213C	SAS5	UPTAG0120	1.06623	0.709105	0.719277	0.874075
2_UPTAG0121	2	YJL065C	DLS1	UPTAG0121	0.874076	1.02029	0.848413	1.11351
2_UPTAG0122	2	YMR219W	ESC1	UPTAG0122	0.927102	1.15934	1.02252	0.985633
2_UPTAG0123	2	YLR015W	BRE2	UPTAG0123	1.23668	0.944883	1.11165	0.909652
2_UPTAG0124	2	YDR469W	SDC1	UPTAG0124	1.22671	0.882571	1.02997	0.956148
2_UPTAG0125	2	YBR175W	SWD3	UPTAG0125	1.51696	0.926581	1.33718	1.01872
2_UPTAG0126	2	YLR288C	MEC3	UPTAG0126	0.944256	0.989435	0.888813	0.947509
2_UPTAG0127	2	YBR278W	DPB3	UPTAG0127	0.962952	1.17441	1.07586	0.977353
2_UPTAG0128	2	YDR121W	DPB4	UPTAG0128	0.700863	0.96993	0.646706	1.05123
2_UPTAG0129	2	YPL001W	HAT1	UPTAG0129	1.15831	0.998182	1.09993	0.946222
2_UPTAG0131	2	YHR119W	SET1	UPTAG0131	1.2499	0.906312	1.07767	1.01465
2_UPTAG0132	2	YCL061C	MRC1	UPTAG0132	1.46612	1.09303	1.52453	0.953141
2_UPTAG0133	2	YGL037C	PNC1	UPTAG0133	1.08378	0.9414	0.970619	0.94798
2_UPTAG0134	2	YOR209C	NPT1	UPTAG0134	1.72913	0.713044	1.17295	1.02471
2_UPTAG0135	2	YDR440W	DOT1	UPTAG0135	1.8753	0.0866145	0.154524	1.07115
2_UPTAG0136	2	YPL138C	SPP1	UPTAG0136	0.924606	1.41545	1.24504	0.888139
2_UPTAG0137	2	YAL019W	FUN30	UPTAG0137	0.968151	0.918004	0.845514	1.12107
2_UPTAG0138	2	YDR254W	CHL4	UPTAG0138	0.959445	1.22064	1.11415	0.952296
2_UPTAG0140	2	YBR107C	IML3	UPTAG0140	1.00885	1.27723	1.22583	0.945423
2_UPTAG0141	2	YGR089W	NNF2	UPTAG0141	1.03232	0.939205	0.922376	1.176
2_UPTAG0142	2	YLR381W	CTF3	UPTAG0142	0.966872	1.2686	1.16688	1.01653
2_UPTAG0143	2	YPR046W	MCM16	UPTAG0143	1.03288	0.984913	0.967788	1.0071
2_UPTAG0144	2	YDR318W	MCM21	UPTAG0144	1.17492	0.739208	0.826245	1.16637
2_UPTAG0146	2	YAR018C	KIN3	UPTAG0146	1.02612	1.00921	0.985175	0.969451
2_UPTAG0147	2	YPL008W	CHL1	UPTAG0147	1.15525	0.881083	0.968332	1.16677
2_UPTAG0148	2	YCR077C	PAT1	UPTAG0148	1.16163	1.14362	1.26381	0.945146
2_UPTAG0149	2	YPL018W	CTF19	UPTAG0149	0.886215	1.10065	0.927941	0.997314
2_UPTAG0151	2	YJR053W	BFA1	UPTAG0151	1.02238	1.08754	1.05776	1.0259
2_UPTAG0152	2	YDR435C	PPM1	UPTAG0152	1.45441	0.985112	1.36303	0.860096
2_UPTAG0153	2	YNL327W	EGT2	UPTAG0153	0.828512	1.09297	0.86147	0.958822
2_UPTAG0156	2	YBR023C	CHS3	UPTAG0156	0.976803	0.956008	0.888386	1.03216
2_UPTAG0157	2	YBL061C	SKT5	UPTAG0157	0.860686	1.04202	0.853208	1.03882
2_UPTAG0158	2	YNL166C	BNI5	UPTAG0158	1.06274	0.844634	0.853944	1.1254
2_UPTAG0165	2	YJL115W	ASF1	UPTAG0165	1.77897	0.750628	1.27036	1.14479
2_UPTAG0166	2	YER142C	MAG1	UPTAG0166	1.07354	0.89544	0.914509	1.05338
2_UPTAG0167	2	YLR427W	MAG2	UPTAG0167	0.697923	1.35994	0.902945	0.812617
2_UPTAG0168	2	YDL200C	MGT1	UPTAG0168	0.913843	1.10625	0.961741	0.918418
2_UPTAG0169	2	YGR081C	SLX9	UPTAG0169	0.722846	1.35124	0.929203	0.95085
2_UPTAG0170	2	YER116C	SLX8	UPTAG0170
2_UPTAG0172	2	YOL090W	MSH2	UPTAG0172	0.743038	1.02409	0.723905	0.955404
2_UPTAG0173	2	YCR092C	MSH3	UPTAG0173	1.03883	1.29022	1.2751	0.900902
2_UPTAG0174	2	YML061C	PIF1	UPTAG0174	1.19995	0.757209	0.864391	0.994452
2_UPTAG0175	2	YJL208C	NUC1	UPTAG0175	0.943345	1.13117	1.01515	0.925202
2_UPTAG0176	2	YDR110W	FOB1	UPTAG0176	0.771117	1.4782	1.08439	0.908421
2_UPTAG0177	2	YHR120W	MSH1	UPTAG0177	0.932615	0.887668	0.787564	1.01248
2_UPTAG0178	2	YLR032W	RAD5	UPTAG0178	1.41917	0.946213	1.27749	1.07078
2_UPTAG0179	2	YMR173W	DDR48	UPTAG0179	0.866193	1.25082	1.03073	0.957943
2_UPTAG0180	2	YJR069C	HAM1	UPTAG0180	0.820548	1.30293	1.01708	0.876813
2_UPTAG0182	2	YDR030C	RAD28	UPTAG0182	0.915632	1.20361	1.04843	0.913289
2_UPTAG0183	2	YDR263C	DIN7	UPTAG0183	1.22995	0.96325	1.12709	1.00433
2_UPTAG0184	2	YBL019W	APN2	UPTAG0184	1.15015	1.04758	1.14624	0.99087
2_UPTAG0185	2	YMR156C	TPP1	UPTAG0185	0.86883	1.1098	0.917299	0.961739
2_UPTAG0186	2	YIR002C	MPH1	UPTAG0186	1.14367	0.882691	0.96038	0.915532
2_UPTAG0187	2	YBR223C	TDP1	UPTAG0187	0.713431	1.13577	0.770861	0.986785
2_UPTAG0189	2	YML021C	UNG1	UPTAG0189	2.66751	0.770272	1.95471	0.795021
2_UPTAG0191	2	YBR228W	SLX1	UPTAG0191	0.734927	1.08268	0.756966	1.13173
2_UPTAG0192	2	YMR137C	PSO2	UPTAG0192	1.3348	1.06531	1.35278	0.931555
2_UPTAG0193	2	YPR135W	CTF4	UPTAG0193	2.21648	1.23999	2.61466	0.944311
2_UPTAG0194	2	YJR144W	MGM101	UPTAG0194	1.00094	1.01884	0.970168	1.24562
2_UPTAG0195	2	YJL092W	SRS2	UPTAG0195	0.987392	1.45507	1.3668	1.03226
2_UPTAG0196	2	YKL114C	APN1	UPTAG0196	0.958477	1.16501	1.06229	0.904901
2_UPTAG0197	2	YAL015C	NTG1	UPTAG0197	1.31412	1.39077	1.73869	0.857138
2_UPTAG0198	2	YOR346W	REV1	UPTAG0198	0.880353	1.12049	0.938423	1.05457
2_UPTAG0199	2	YDR386W	MUS81	UPTAG0199	1.03569	1.00415	0.989381	1.04918
2_UPTAG0200	2	YDR419W	RAD30	UPTAG0200	0.939393	1.24424	1.11195	0.905977
2_UPTAG0201	2	YHR081W	LRP1	UPTAG0201	0.870427	0.915016	0.757695	1.02934
2_UPTAG0202	2	YPR164W	MMS1	UPTAG0202	1.60983	0.792166	1.21319	1.08167
2_UPTAG0203	2	YLR265C	NEJ1	UPTAG0203	1.03519	1.0316	1.01593	1.12334
2_UPTAG0205	2	YGL127C	SOH1	UPTAG0205	1.34043	1.52006	1.93837	1.10337
2_UPTAG0206	2	YDR079C-A	TFB5	UPTAG0206	0.632508	1.13063	0.680331	1.0848
2_UPTAG0207	2	YKL025C	PAN3	UPTAG0207	1.07334	0.926303	0.945854	0.929955
2_UPTAG0209	2	YMR224C	MRE11	UPTAG0209	1.82984	0.851689	1.48261	1.14387
2_UPTAG0210	2	YIL153W	RRD1	UPTAG0210	1.27368	0.831816	1.00791	1.19912
2_UPTAG0211	2	YML060W	OGG1	UPTAG0211	0.984617	1.54738	1.44943	0.814761
2_UPTAG0212	2	YER169W	RPH1	UPTAG0212	1.21909	0.969924	1.12488	1.08727
2_UPTAG0214	2	YBR098W	MMS4	UPTAG0214	1.54328	1.03654	1.52182	0.907788
2_UPTAG0215	2	YML102W	CAC2	UPTAG0215	1.40957	0.862718	1.15688	0.889838
2_UPTAG0216	2	YBR195C	MSI1	UPTAG0216	1.26768	0.97525	1.17614	1.00123
2_UPTAG0217	2	YPL167C	REV3	UPTAG0217	0.828229	1.42432	1.12226	0.987241
2_UPTAG0218	2	YIL139C	REV7	UPTAG0218	0.914095	1.04632	0.909887	0.926017
2_UPTAG0219	2	YHR031C	RRM3	UPTAG0219	1.04973	0.903222	0.901993	1.01732
2_UPTAG0222	2	YDR279W	RNH202	UPTAG0222	1.25446	0.856296	1.02191	0.995842
2_UPTAG0223	2	YLR154C	RNH203	UPTAG0223	1.09889	1.14033	1.19211	0.980816
2_UPTAG0224	2	YER070W	RNR1	UPTAG0224	5.38475	0.647457	3.31672	1.17219
2_UPTAG0225	2	YIL066C	RNR3	UPTAG0225	0.720246	1.06068	0.726772	1.06075
2_UPTAG0226	2	YGR180C	RNR4	UPTAG0226	1.21948	0.845833	0.981281	1.10128
2_UPTAG0227	2	YNL273W	TOF1	UPTAG0227	1.01311	1.02348	0.986433	0.954781
2_UPTAG0228	2	YGR276C	RNH70	UPTAG0228	0.943195	0.96722	0.86788	0.998566
2_UPTAG0229	2	YLR135W	SLX4	UPTAG0229	0.838265	1.25729	1.00265	1.07779
2_UPTAG0230	2	YNL218W	MGS1	UPTAG0230	1.00471	1.17856	1.12649	0.941727
2_UPTAG0231	2	YCR086W	CSM1	UPTAG0231	4.11855	0.699969	2.74256	0.511976
2_UPTAG0232	2	YOR144C	ELG1	UPTAG0232	1.18633	0.892105	1.00683	1.22831
2_UPTAG0233	2	YKR010C	TOF2	UPTAG0233	1.07583	1.1515	1.17854	1.05846
2_UPTAG0234	2	YOR330C	MIP1	UPTAG0234	0.834823	1.13159	0.898707	1.01568
2_UPTAG0236	2	YLR320W	MMS22	UPTAG0236	4.62725	0.620922	2.73334	1.09658
2_UPTAG0237	2	YOR005C	DNL4	UPTAG0237	1.14615	1.04404	1.13839	0.872124
2_UPTAG0239	2	YGL090W	LIF1	UPTAG0239	1.04653	1.08569	1.08091	1.03581
2_UPTAG0240	2	YCR014C	POL4	UPTAG0240	0.844831	1.00063	0.804226	0.911231
2_UPTAG0243	2	YNL250W	RAD50	UPTAG0243	1.818	1.01707	1.75904	1.17465
2_UPTAG0244	2	YDR369C	XRS2	UPTAG0244	1.44661	1.76728	2.43214	0.903697
2_UPTAG0245	2	YBR214W	SDS24	UPTAG0245	0.82359	1.43349	1.12315	0.825106
2_UPTAG0246	2	YIL135C	VHS2	UPTAG0246	0.928261	0.858322	0.757972	1.04499
2_UPTAG0247	2	YFR040W	SAP155	UPTAG0247	1.51894	0.741707	1.07178	1.07585
2_UPTAG0248	2	YJL098W	SAP185	UPTAG0248	0.668924	1.11655	0.71054	1.04412
2_UPTAG0249	2	YKR028W	SAP190	UPTAG0249	0.82189	1.00049	0.782276	1.15952
2_UPTAG0250	2	YGL229C	SAP4	UPTAG0250	0.788725	0.885514	0.664437	1.06693
2_UPTAG0252	2	YPR120C	CLB5	UPTAG0252	1.6724	0.953246	1.51662	0.866293
2_UPTAG0253	2	YGR109C	CLB6	UPTAG0253	0.898025	0.979834	0.837094	0.919997
2_UPTAG0254	2	YAL040C	CLN3	UPTAG0254	1.54782	0.973109	1.4329	0.914525
2_UPTAG0255	2	YER167W	BCK2	UPTAG0255	0.953312	1.17749	1.06789	0.885577
2_UPTAG0256	2	YKR072C	SIS2	UPTAG0256	0.873187	0.687435	0.571047	1.16263
2_UPTAG0257	2	YOR054C	VHS3	UPTAG0257	0.939034	1.02118	0.912253	0.939806
2_UPTAG0258	2	YLR079W	SIC1	UPTAG0258	2.12982	1.00415	2.03457	1.13622
2_UPTAG0259	2	YJR059W	PTK2	UPTAG0259	0.897248	0.73878	0.630609	0.923421
2_UPTAG0260	2	YCR008W	SAT4	UPTAG0260	0.761069	0.788668	0.57102	1.51388
2_UPTAG0261	2	YER089C	PTC2	UPTAG0261	1.2242	0.775591	0.903273	0.897897
2_UPTAG0262	2	YER111C	SWI4	UPTAG0262	3.09403	0.602836	1.77442	0.83138
2_UPTAG0265	2	YBR215W	HPC2	UPTAG0265	0.940306	0.793736	0.710033	1.051
2_UPTAG0266	2	YLR131C	ACE2	UPTAG0266	0.722715	1.84906	1.27131	1.13559
2_UPTAG0267	2	YDR146C	SWI5	UPTAG0267	1.53218	1.12394	1.63828	1.24836
2_UPTAG0268	2	YGR108W	CLB1	UPTAG0268	0.933816	1.04975	0.932565	0.961092
2_UPTAG0269	2	YPR119W	CLB2	UPTAG0269	0.897184	1.07621	0.918565	1.03172
2_UPTAG0270	2	YDL155W	CLB3	UPTAG0270	0.84566	0.787545	0.633584	0.886956
2_UPTAG0271	2	YLR210W	CLB4	UPTAG0271	1.14062	0.881618	0.95665	0.869039
2_UPTAG0272	2	YBL051C	PIN4	UPTAG0272	1.81068	0.778254	1.34059	1.27783
2_UPTAG0273	2	YJL187C	SWE1	UPTAG0273	0.965346	1.07797	0.989969	1.12419
2_UPTAG0274	2	YMR036C	MIH1	UPTAG0274	1.32605	0.863406	1.0892	0.932465
2_UPTAG0276	2	YPR193C	HPA2	UPTAG0276	1.24418	0.866911	1.0261	0.893556
2_UPTAG0277	2	YEL066W	HPA3	UPTAG0277	1.30983	0.833815	1.039	0.943
2_UPTAG0278	2	YGR252W	GCN5	UPTAG0278	5.02814	0.576338	2.75688	0.930132
2_UPTAG0279	2	YOR064C	YNG1	UPTAG0279	1.14316	0.869133	0.945207	1.03117
2_UPTAG0280	2	YIL112W	HOS4	UPTAG0280	0.95058	1.03333	0.934463	1.01787
2_UPTAG0281	2	YKR029C	SET3	UPTAG0281	1.23199	1.0431	1.22255	0.810985
2_UPTAG0283	2	YBR258C	SHG1	UPTAG0283	0.87961	0.948868	0.794016	1.00269
2_UPTAG0284	2	YKL017C	HCS1	UPTAG0284	1.05853	1.01356	1.02068	1.01951
2_UPTAG0285	2	YGR230W	BNS1	UPTAG0285	0.997342	1.20975	1.14782	1.05223
2_UPTAG0287	2	YDL115C	IWR1	UPTAG0287	1.56097	0.978383	1.45291	0.868335
2_UPTAG0288	2	YPL130W	SPO19	UPTAG0288	0.93188	1.01472	0.899578	1.03233
2_UPTAG0289	2	YIL073C	SPO22	UPTAG0289	1.24233	1.13313	1.33922	0.981082
2_UPTAG0290	2	YNL012W	SPO1	UPTAG0290	0.929553	1.05557	0.933453	1.01934
2_UPTAG0291	2	YBL009W	ALK2	UPTAG0291	0.87707	0.820498	0.684612	0.885193
2_UPTAG0292	2	YJR094C	IME1	UPTAG0292	1.11337	0.914686	0.968822	1.00493
2_UPTAG0293	2	YGR247W	CPD1	UPTAG0293	1.01769	1.0504	1.01696	0.983783
2_UPTAG0294	2	YPR007C	REC8	UPTAG0294	0.897385	0.887604	0.757759	1.14269
2_UPTAG0295	2	YDR285W	ZIP1	UPTAG0295	0.979964	1.17622	1.09656	1.30273
2_UPTAG0296	2	YIL072W	HOP1	UPTAG0296	0.868202	1.34093	1.10754	0.922634
2_UPTAG0297	2	YNL082W	PMS1	UPTAG0297	0.966311	0.945387	0.86908	0.978496
2_UPTAG0298	2	YGL251C	HFM1	UPTAG0298	1.28158	0.919243	1.12075	0.839646
2_UPTAG0299	2	YNL025C	SSN8	UPTAG0299	1.02166	1.5207	1.47802	1.02114
2_UPTAG0300	2	YMR198W	CIK1	UPTAG0300	1.70288	0.857337	1.38889	0.913982
2_UPTAG0301	2	YPR141C	KAR3	UPTAG0301	1.78676	0.691652	1.17567	1.11006
2_UPTAG0302	2	YFR046C	CNN1	UPTAG0302	0.853377	0.978109	0.794074	0.976634
2_UPTAG0303	2	YPL194W	DDC1	UPTAG0303	0.92463	1.00492	0.883961	0.897572
2_UPTAG0304	2	YDR273W	DON1	UPTAG0304	0.836316	1.41484	1.12567	1.01475
2_UPTAG0305	2	YPL055C	LGE1	UPTAG0305	0.142307	1.72981	0.234184	0.808802
2_UPTAG0306	2	YGL045W	RIM8	UPTAG0306	0.889216	0.9429	0.797639	0.904062
2_UPTAG0307	2	YOR195W	SLK19	UPTAG0307	0.985299	1.06148	0.994979	0.927371
2_UPTAG0308	2	YPL033C	SRL4	UPTAG0308	0.807876	1.06568	0.819042	0.930143
2_UPTAG0309	2	YPR078C	YPR078C	UPTAG0309	1.19429	0.83258	0.94595	0.810251
2_UPTAG0310	2	YGL192W	IME4	UPTAG0310	0.76696	0.878404	0.640914	0.976409
2_UPTAG0312	2	YJR066W	TOR1	UPTAG0312	1.20586	0.896861	1.02886	1.03105
2_UPTAG0313	2	YOR178C	GAC1	UPTAG0313
2_UPTAG0315	2	YHL024W	RIM4	UPTAG0315	1.11492	0.966752	1.02539	1.08776
2_UPTAG0316	2	YNL210W	MER1	UPTAG0316	0.81198	1.43493	1.10843	0.970215
2_UPTAG0317	2	YER179W	DMC1	UPTAG0317	0.850808	0.93436	0.756274	1.04542
2_UPTAG0318	2	YGR044C	RME1	UPTAG0318	0.953161	1.30307	1.18159	0.980606
2_UPTAG0319	2	YOL091W	SPO21	UPTAG0319	0.835409	1.40739	1.11853	0.954982
2_UPTAG0320	2	YHR124W	NDT80	UPTAG0320	0.979806	0.886408	0.826241	1.02615
2_UPTAG0321	2	YCL055W	KAR4	UPTAG0321	0.985689	0.968759	0.908425	1.00428
2_UPTAG0322	2	YIL132C	CSM2	UPTAG0322	0.93573	1.0743	0.956335	1.05958
[truncated: 3,036 more rows]

## Sheet: UpTag_screen2
	Plate	ORF	Gene	TAG	K79me3_over_K79me1	K79me1_over_H3	K79me3_over_H3	H3_over_input
[truncated: 4,268 more rows]

[truncated: 6 more sheets: DownTag_screen1, DownTag_screen2, raw_UpTag_screen1, raw_DownTag_screen1, raw_UpTag_screen2, raw_DownTag_screen2]
