# Supplementary material for: Direct screening for chromatin status on DNA barcodes in yeast delineates the regulome of H3K79 methylation by Dot1
Source: eLife. 2016 Dec 6;5:e18919. doi: 10.7554/eLife.18919 (PMC5179194; doi:10.7554/eLife.18919)
Supplement: Figure 2—source data 1. — DOI: http://dx.doi.org/10.7554/eLife.18919.007 [file elife-18919-fig2-data1.xlsx]

## Sheet: Readme
Figure 2 - source data 1
Belonging to Figure 2A
Growth rates calculated for all strains.
Sheets
Growth rates	Calculated growth rates from two experiments, and average growth rate
raw_UpTag	Raw UpTag of both experiments
raw_DownTag	Raw DownTag of both experiments
Columns Growth rates
Rownames	Unique identifiers. Plate_TAGnr.
ORF	Systematic name of the deleted gene
Gene	Standard name, as in SGD in February 2016
Plate	Which of 5 plates (5 subsets) the strain was on
TAG	Barcode number present in this strain. (without "UP" or "DN")
mu_meanbiol	Growth rate of the KO strain, average of mu_A and mu_B.
dt_meanbiol	Doubling time of the KO strain, calculated by ln(2)/mu.
mu_A	Growth rate of the KO strain, first replicate (average of mu calculated for UP and DN)
mu_B	Growth rate of the KO strain, second replicate (average of mu calculated for UP and DN)
Columns raw data
Rownames	Barcodes
All other columns	Plate_time points_replicate combination. Data in one column came from one PCR and thus got one index.

## Sheet: Growth rates
	ORF	Gene	Plate	TAG	mu_meanbiol	dt_meanbiol	mu_A	mu_B
1_TAG0001	YOR094W	ARF3	1	TAG0001	0.410402	1.68895	0.409414	0.41139
1_TAG0003	YDL161W	ENT1	1	TAG0003	0.41782	1.65896	0.417406	0.418235
1_TAG0004	YLR206W	ENT2	1	TAG0004	0.428407	1.61796	0.425596	0.431218
1_TAG0005	YLL038C	ENT4	1	TAG0005	0.416814	1.66297	0.426716	0.406912
1_TAG0006	YHR016C	YSC84	1	TAG0006	0.433912	1.59744	0.435922	0.431903
1_TAG0008	YNL293W	MSB3	1	TAG0008	0.407314	1.70175	0.403897	0.410731
1_TAG0009	YCL034W	LSB5	1	TAG0009	0.391082	1.77238	0.397202	0.384962
1_TAG0010	YBR128C	ATG14	1	TAG0010	0.440149	1.5748	0.460715	0.419583
1_TAG0011	YMR159C	ATG16	1	TAG0011	0.426938	1.62353	0.428949	0.424928
1_TAG0012	YPL100W	ATG21	1	TAG0012	0.431524	1.60628	0.430963	0.432084
1_TAG0013	YCR068W	ATG15	1	TAG0013	0.432648	1.6021	0.418504	0.446792
1_TAG0014	YOL007C	CSI2	1	TAG0014	0.400721	1.72975	0.393838	0.407605
1_TAG0015	YER150W	SPI1	1	TAG0015	0.421613	1.64404	0.438571	0.404656
1_TAG0016	YIR039C	YPS6	1	TAG0016	0.425887	1.62754	0.413386	0.438388
1_TAG0017	YOR034C	AKR2	1	TAG0017	0.413319	1.67703	0.423762	0.402875
1_TAG0018	YHR057C	CPR2	1	TAG0018	0.417873	1.65875	0.427008	0.408739
1_TAG0019	YLR361C	DCR2	1	TAG0019	0.42503	1.63082	0.419682	0.430378
1_TAG0020	YER039C	HVG1	1	TAG0020	0.433107	1.60041	0.432185	0.434028
1_TAG0021	YJL223C	PAU1	1	TAG0021	0.433927	1.59738	0.421675	0.446179
1_TAG0022	YEL049W	PAU2	1	TAG0022	0.409799	1.69143	0.409003	0.410596
1_TAG0023	YCR104W	PAU3	1	TAG0023	0.409463	1.69282	0.414646	0.40428
1_TAG0024	YLR461W	PAU4	1	TAG0024	0.427737	1.6205	0.42089	0.434584
1_TAG0025	YFL020C	PAU5	1	TAG0025	0.428985	1.61578	0.422551	0.43542
1_TAG0027	YKR098C	UBP11	1	TAG0027	0.44486	1.55812	0.437853	0.451868
1_TAG0028	YDL206W	YDL206W	1	TAG0028	0.431305	1.60709	0.434454	0.428156
1_TAG0029	YFL040W	YFL040W	1	TAG0029	0.411838	1.68306	0.41399	0.409687
1_TAG0030	YFR018C	YFR018C	1	TAG0030	0.397454	1.74397	0.40958	0.385327
1_TAG0031	YGL081W	YGL081W	1	TAG0031	0.389458	1.77978		0.389458
1_TAG0032	YLR057W	MNL2	1	TAG0032	0.426948	1.62349	0.434682	0.419214
1_TAG0033	YNR071C	YNR071C	1	TAG0033	0.429418	1.61416	0.429642	0.429193
1_TAG0034	YPR084W	YPR084W	1	TAG0034	0.412257	1.68135	0.41425	0.410265
1_TAG0035	YGL259W	YPS5	1	TAG0035	0.421093	1.64607	0.423487	0.418699
1_TAG0036	YMR237W	BCH1	1	TAG0036	0.414266	1.67319	0.414982	0.41355
1_TAG0037	YGL083W	SCY1	1	TAG0037	0.424739	1.63194	0.43135	0.418129
1_TAG0038	YMR071C	TVP18	1	TAG0038	0.432788	1.60159	0.42782	0.437755
1_TAG0039	YBL010C	YBL010C	1	TAG0039	#NUM!	#NUM!
1_TAG0041	YHL017W	YHL017W	1	TAG0041	0.426079	1.6268	0.420019	0.432139
1_TAG0042	YJL207C	LAA1	1	TAG0042	0.437444	1.58454	0.44479	0.430098
1_TAG0045	YDR100W	TVP15	1	TAG0045	0.425802	1.62786	0.426084	0.42552
1_TAG0046	YER101C	AST2	1	TAG0046	0.410005	1.69058	0.405062	0.414947
1_TAG0047	YDR371W	CTS2	1	TAG0047	0.399064	1.73693	0.4138	0.384328
1_TAG0048	YDR084C	TVP23	1	TAG0048	0.446739	1.55157	0.437558	0.45592
1_TAG0049	YKR088C	TVP38	1	TAG0049	0.409154	1.6941	0.401771	0.416537
1_TAG0050	YEL005C	VAB2	1	TAG0050	0.419053	1.65408	0.423708	0.414398
1_TAG0051	YBL104C	SEA4	1	TAG0051	0.428442	1.61783	0.422943	0.433942
1_TAG0052	YIR035C	YIR035C	1	TAG0052	0.424957	1.6311	0.424763	0.42515
1_TAG0055	YDR304C	CPR5	1	TAG0055	0.391265	1.77155	0.388707	0.393823
1_TAG0056	YML101C	CUE4	1	TAG0056	0.365902	1.89435	0.375993	0.355811
1_TAG0057	YGR223C	HSV2	1	TAG0057	0.397684	1.74296	0.403667	0.391702
1_TAG0058	YLR351C	NIT3	1	TAG0058	0.444576	1.55912	0.435243	0.453908
1_TAG0059	YJL123C	MTC1	1	TAG0059	0.402203	1.72338	0.414607	0.389799
1_TAG0060	YJR015W	YJR015W	1	TAG0060	0.406862	1.70364	0.400173	0.413551
1_TAG0061	YPL105C	SYH1	1	TAG0061	0.44386	1.56164	0.490464	0.397255
1_TAG0062	YDR349C	YPS7	1	TAG0062	0.418529	1.65615	0.414351	0.422707
1_TAG0063	YDR411C	DFM1	1	TAG0063	0.418435	1.65652	0.416183	0.420688
1_TAG0064	YFR041C	ERJ5	1	TAG0064	0.43302	1.60073	0.427512	0.438528
1_TAG0065	YJR118C	ILM1	1	TAG0065	0.319152	2.17184	0.307049	0.331256
1_TAG0067	YNL156C	NSG2	1	TAG0067	0.449215	1.54302	0.455926	0.442505
1_TAG0068	YMR123W	PKR1	1	TAG0068	0.297779	2.32773	0.323428	0.272129
1_TAG0069	YDL204W	RTN2	1	TAG0069	0.427163	1.62268	0.43004	0.424285
1_TAG0070	YHR181W	SVP26	1	TAG0070	0.412328	1.68106	0.412788	0.411867
1_TAG0071	YBR273C	UBX7	1	TAG0071	0.433829	1.59774	0.434737	0.43292
1_TAG0072	YBR096W	YBR096W	1	TAG0072	0.494602	1.40142	0.494602	#NUM!
1_TAG0075	YDR221W	GTB1	1	TAG0075	0.407766	1.69986	0.403477	0.412055
1_TAG0077	YDR476C	YDR476C	1	TAG0077	0.399006	1.73719	0.395339	0.402672
1_TAG0078	YEL001C	IRC22	1	TAG0078	0.441999	1.56821	0.451312	0.432686
1_TAG0080	YER053C-A	YER053C-A	1	TAG0080	0.422874	1.63913	0.451331	0.394418
1_TAG0081	YKL065C	YET1	1	TAG0081	0.417808	1.65901	0.42263	0.412985
1_TAG0083	YGL010W	MPO1	1	TAG0083	0.432773	1.60164	0.443029	0.422516
1_TAG0084	YGL231C	EMC4	1	TAG0084	0.382133	1.81389	0.392879	0.371387
1_TAG0085	YGR263C	SAY1	1	TAG0085	0.422095	1.64216	0.423055	0.421136
1_TAG0086	YHR045W	YHR045W	1	TAG0086	0.425449	1.62921	0.42233	0.428567
1_TAG0087	YIL039W	TED1	1	TAG0087	0.427973	1.6196	0.431241	0.424705
1_TAG0088	YJR088C	EMC2	1	TAG0088	0.439152	1.57837	0.449109	0.429196
1_TAG0089	YLL014W	EMC6	1	TAG0089	0.414687	1.67149	0.409002	0.420373
1_TAG0090	YLL023C	POM33	1	TAG0090	0.442877	1.5651	0.447892	0.437862
1_TAG0091	YLR050C	YLR050C	1	TAG0091	0.425909	1.62745	0.419986	0.431832
1_TAG0092	YLR064W	PER33	1	TAG0092	0.279769	2.47757	0.259578	0.29996
1_TAG0093	YNL046W	YNL046W	1	TAG0093	0.416341	1.66485	0.423357	0.409326
1_TAG0094	YNL146W	YNL146W	1	TAG0094	0.418458	1.65643	0.425078	0.411837
1_TAG0095	YNR021W	YNR021W	1	TAG0095	0.420397	1.64879	0.441009	0.399785
1_TAG0096	YOR044W	IRC23	1	TAG0096	0.447985	1.54725	0.444383	0.451587
1_TAG0098	YPL207W	TYW1	1	TAG0098	0.42485	1.63151	0.424006	0.425694
1_TAG0099	YPR003C	YPR003C	1	TAG0099	0.421476	1.64457	0.429873	0.413079
1_TAG0100	YPR063C	YPR063C	1	TAG0100	0.426307	1.62594	0.422863	0.42975
1_TAG0101	YPR091C	NVJ2	1	TAG0101	0.410292	1.6894	0.416685	0.4039
1_TAG0102	YPR114W	YPR114W	1	TAG0102	0.417677	1.65953	0.420482	0.414871
1_TAG0104	YDR519W	FPR2	1	TAG0104	0.432119	1.60406	0.429114	0.435125
1_TAG0105	YDR056C	EMC10	1	TAG0105	0.426973	1.6234	0.426939	0.427007
1_TAG0106	YGL079W	KXD1	1	TAG0106	0.420431	1.64866	0.422633	0.418229
1_TAG0107	YGR206W	MVB12	1	TAG0107	0.420214	1.64951	0.427207	0.41322
1_TAG0108	YKL061W	BLI1	1	TAG0108	0.418355	1.65684	0.420319	0.41639
1_TAG0109	YLR073C	RFU1	1	TAG0109	0.436385	1.58839	0.429621	0.443148
1_TAG0110	YLR408C	BLS1	1	TAG0110	0.420691	1.64764	0.423743	0.417639
1_TAG0111	YMR171C	EAR1	1	TAG0111	0.433359	1.59947	0.424444	0.442275
1_TAG0112	YNL086W	SNN1	1	TAG0112	0.438866	1.5794	0.443135	0.434598
1_TAG0113	YHR105W	YPT35	1	TAG0113	0.419716	1.65147	0.418363	0.421068
1_TAG0116	YPL246C	RBD2	1	TAG0116	0.441397	1.57035	0.457002	0.425791
1_TAG0117	YJR134C	SGM1	1	TAG0117	0.415883	1.66669	0.403997	0.427769
1_TAG0118	YER113C	TMN3	1	TAG0118	0.454355	1.52556	0.456853	0.451858
1_TAG0119	YOL107W	YOL107W	1	TAG0119	0.43283	1.60143	0.441013	0.424646
1_TAG0121	YOR311C	DGK1	1	TAG0121	0.413227	1.6774	0.413551	0.412902
1_TAG0122	YDR275W	BSC2	1	TAG0122	0.452396	1.53217	0.463985	0.440807
1_TAG0123	YCR069W	CPR4	1	TAG0123	0.454176	1.52616	0.465677	0.442676
1_TAG0124	YDR107C	TMN2	1	TAG0124	0.420589	1.64804	0.417474	0.423705
1_TAG0125	YER170W	ADK2	1	TAG0125	0.430177	1.61131	0.431714	0.42864
1_TAG0126	YKR027W	BCH2	1	TAG0126	0.402633	1.72153	0.39701	0.408257
1_TAG0127	YDR033W	MRH1	1	TAG0127	0.406387	1.70563	0.418305	0.394468
1_TAG0128	YER049W	TPA1	1	TAG0128	0.3863	1.79432	0.364881	0.407719
1_TAG0129	YLR151C	PCD1	1	TAG0129	0.413678	1.67557	0.426273	0.401084
1_TAG0130	YMR204C	INP1	1	TAG0130	0.435594	1.59127	0.423072	0.448115
1_TAG0131	YOL019W	YOL019W	1	TAG0131	0.450433	1.53885	0.451612	0.449255
1_TAG0132	YKR007W	MEH1	1	TAG0132	0.38539	1.79856	0.365927	0.404853
1_TAG0133	YDR119W	VBA4	1	TAG0133	0.43731	1.58502	0.434246	0.440375
1_TAG0134	YDR352W	YPQ2	1	TAG0134	0.409759	1.6916	0.40703	0.412488
1_TAG0135	YNR028W	CPR8	1	TAG0135	0.440381	1.57397	0.431932	0.44883
1_TAG0137	YDL010W	GRX6	1	TAG0137	0.433747	1.59804	0.430172	0.437323
1_TAG0138	YHL008C	YHL008C	1	TAG0138	0.435804	1.5905	0.428306	0.443302
1_TAG0139	YBR014C	GRX7	1	TAG0139	0.429024	1.61564	0.417374	0.440674
1_TAG0140	YER014C-A	BUD25	1	TAG0140	0.286799	2.41684	0.292834	0.280763
1_TAG0141	YOR299W	BUD7	1	TAG0141	0.417534	1.6601	0.425376	0.409692
1_TAG0143	YDR006C	SOK1	1	TAG0143	0.430588	1.60977	0.417174	0.444002
1_TAG0144	YNL323W	LEM3	1	TAG0144	0.393073	1.76341	0.40325	0.382897
1_TAG0146	YBL101C	ECM21	1	TAG0146	0.445622	1.55546	0.441301	0.449942
1_TAG0147	YOR092W	ECM3	1	TAG0147	0.406855	1.70367	0.398748	0.414962
1_TAG0148	YER083C	GET2	1	TAG0148	0.361996	1.91479	0.368492	0.355499
1_TAG0149	YIL002C	INP51	1	TAG0149	0.423943	1.635	0.41505	0.432836
1_TAG0151	YOR109W	INP53	1	TAG0151	0.433254	1.59986	0.44083	0.425679
1_TAG0153	YMR140W	SIP5	1	TAG0153	0.407146	1.70245	0.411935	0.402357
1_TAG0154	YJR060W	CBF1	1	TAG0154	0.38605	1.79549	0.385241	0.386859
1_TAG0155	YER120W	SCS2	1	TAG0155	0.357052	1.94131	0.374633	0.339471
1_TAG0156	YGL053W	PRM8	1	TAG0156	0.410354	1.68915	0.403929	0.416779
1_TAG0157	YBR283C	SSH1	1	TAG0157	0.400346	1.73137	0.406487	0.394205
1_TAG0158	YER019C-A	SBH2	1	TAG0158	0.426948	1.62349	0.417467	0.43643
1_TAG0162	YHR161C	YAP1801	1	TAG0162	0.451898	1.53386	0.444074	0.459722
1_TAG0163	YGR241C	YAP1802	1	TAG0163	0.420143	1.64979	0.431137	0.409149
1_TAG0165	YNR075W	COS10	1	TAG0165	0.433854	1.59765	0.415289	0.452419
1_TAG0166	YNL227C	JJJ1	1	TAG0166	0.334341	2.07317	0.338181	0.330502
1_TAG0167	YPL032C	SVL3	1	TAG0167	0.399643	1.73442	0.394735	0.404551
1_TAG0168	YDL231C	BRE4	1	TAG0168	0.43715	1.58561	0.43867	0.435629
1_TAG0171	YDR388W	RVS167	1	TAG0171	0.391349	1.77117	0.383346	0.399352
1_TAG0172	YCR009C	RVS161	1	TAG0172	0.402985	1.72003	0.400696	0.405274
1_TAG0173	YCR053W	THR4	1	TAG0173	0.422514	1.64053	0.427407	0.417621
1_TAG0174	YDR264C	AKR1	1	TAG0174	0.378636	1.83064	0.385478	0.371794
1_TAG0175	YDR036C	EHD3	1	TAG0175	0.421156	1.64582	0.409563	0.432749
1_TAG0176	YDR069C	DOA4	1	TAG0176	0.381415	1.8173	0.403309	0.359521
1_TAG0178	YAL030W	SNC1	1	TAG0178	0.427275	1.62225	0.429266	0.425285
1_TAG0179	YOR327C	SNC2	1	TAG0179	0.42491	1.63128		0.42491
1_TAG0180	YBR207W	FTH1	1	TAG0180	0.406492	1.70519	0.404708	0.408276
1_TAG0181	YIL090W	ICE2	1	TAG0181	0.420155	1.64974	0.421521	0.41879
1_TAG0182	YDR320C	SWA2	1	TAG0182	0.2967	2.33619	0.288501	0.304898
1_TAG0183	YNL049C	SFB2	1	TAG0183	0.427576	1.62111	0.437992	0.41716
1_TAG0184	YAL007C	ERP2	1	TAG0184	0.427343	1.62199	0.421577	0.433109
1_TAG0185	YML012W	ERV25	1	TAG0185	0.404808	1.71229	0.400395	0.40922
1_TAG0186	YGR284C	ERV29	1	TAG0186	0.427866	1.62001	0.421018	0.434714
1_TAG0187	YNL044W	YIP3	1	TAG0187	0.419868	1.65087	0.408318	0.431418
1_TAG0188	YCR067C	SED4	1	TAG0188	0.443113	1.56427	0.461954	0.424273
1_TAG0190	YDR057W	YOS9	1	TAG0190	0.393166	1.76299	0.39459	0.391743
1_TAG0191	YHR098C	SFB3	1	TAG0191	0.255973	2.70789	0.253891	0.258055
1_TAG0192	YJL192C	SOP4	1	TAG0192	0.420383	1.64885	0.413861	0.426905
1_TAG0193	YOR216C	RUD3	1	TAG0193	0.405281	1.71029	0.413632	0.396931
1_TAG0194	YFL048C	EMP47	1	TAG0194	0.392874	1.7643	0.398299	0.38745
1_TAG0195	YLR080W	EMP46	1	TAG0195	0.397439	1.74403	0.410951	0.383928
1_TAG0196	YML067C	ERV41	1	TAG0196	0.412793	1.67916	0.416446	0.40914
1_TAG0197	YAL042W	ERV46	1	TAG0197	0.406343	1.70582	0.403629	0.409058
1_TAG0198	YAR002C-A	ERP1	1	TAG0198	0.39746	1.74394	0.396217	0.398702
1_TAG0199	YGR166W	TRS65	1	TAG0199	0.40089	1.72902	0.415018	0.386762
1_TAG0200	YOR115C	TRS33	1	TAG0200	0.416979	1.66231	0.417433	0.416524
1_TAG0201	YIL044C	AGE2	1	TAG0201	0.424561	1.63262	0.428803	0.420318
1_TAG0202	YIL076W	SEC28	1	TAG0202	0.431538	1.60623	0.417757	0.445318
1_TAG0203	YCL001W	RER1	1	TAG0203	0.424714	1.63203	0.42406	0.425368
1_TAG0204	YDR524C	AGE1	1	TAG0204	0.231279	2.99702	0.221826	0.240732
1_TAG0205	YDL226C	GCS1	1	TAG0205	0.235728	2.94045	0.236083	0.235374
1_TAG0206	YDL192W	ARF1	1	TAG0206	0.300021	2.31033	0.303747	0.296295
1_TAG0207	YDL137W	ARF2	1	TAG0207	0.425347	1.62961	0.424164	0.426529
1_TAG0208	YHR142W	CHS7	1	TAG0208	0.409059	1.69449	0.399028	0.41909
1_TAG0209	YGL054C	ERV14	1	TAG0209	0.40817	1.69818	0.407725	0.408616
1_TAG0210	YGL200C	EMP24	1	TAG0210	0.417939	1.65849	0.403862	0.432015
1_TAG0211	YLR268W	SEC22	1	TAG0211	0.382951	1.81002	0.389934	0.375968
1_TAG0212	YER122C	GLO3	1	TAG0212	0.371752	1.86454	0.365018	0.378485
1_TAG0213	YMR292W	GOT1	1	TAG0213	0.403339	1.71852	0.403753	0.402924
1_TAG0214	YJR031C	GEA1	1	TAG0214	0.426139	1.62658	0.425186	0.427091
1_TAG0216	YDR108W	TRS85	1	TAG0216	0.423013	1.6386	0.40759	0.438435
1_TAG0217	YLR207W	HRD3	1	TAG0217	0.429764	1.61286	0.422931	0.436596
1_TAG0218	YHR204W	MNL1	1	TAG0218	0.431484	1.60643	0.444217	0.418751
1_TAG0219	YBR201W	DER1	1	TAG0219	0.414579	1.67193	0.407802	0.421356
1_TAG0222	YNL064C	YDJ1	1	TAG0222	0.445108	1.55726	0.440935	0.44928
1_TAG0223	YFL025C	BST1	1	TAG0223	0.376374	1.84165	0.373074	0.379674
1_TAG0224	YMR264W	CUE1	1	TAG0224	0.433581	1.59865	0.434134	0.433029
1_TAG0225	YKL079W	SMY1	1	TAG0225	0.408735	1.69584	0.388973	0.428497
1_TAG0226	YOL065C	INP54	1	TAG0226	0.4301	1.6116	0.418317	0.441883
1_TAG0227	YDR122W	KIN1	1	TAG0227	0.444794	1.55836	0.443102	0.446486
1_TAG0228	YLR096W	KIN2	1	TAG0228	0.44383	1.56174	0.442186	0.445473
1_TAG0229	YPR032W	SRO7	1	TAG0229	0.353806	1.95912	0.325439	0.382173
1_TAG0230	YBL106C	SRO77	1	TAG0230	0.436721	1.58716	0.444526	0.428916
1_TAG0231	YOR049C	RSB1	1	TAG0231	0.528328	1.31196	0.528328	#NUM!
1_TAG0232	YPL147W	PXA1	1	TAG0232	0.435691	1.59092	0.43519	0.436191
1_TAG0233	YKL188C	PXA2	1	TAG0233	0.431677	1.60571	0.435402	0.427951
1_TAG0235	YDR153C	ENT5	1	TAG0235	0.460003	1.50683	0.458703	0.461303
1_TAG0236	YBL102W	SFT2	1	TAG0236	0.441031	1.57165	0.423337	0.458725
1_TAG0237	YJL004C	SYS1	1	TAG0237	0.271573	2.55234	0.25176	0.291387
1_TAG0238	YJL099W	CHS6	1	TAG0238	0.417239	1.66127	0.386629	0.447849
1_TAG0239	YPL195W	APL5	1	TAG0239	0.345822	2.00434	0.350933	0.340711
1_TAG0240	YGR261C	APL6	1	TAG0240	0.418335	1.65692	0.420455	0.416214
1_TAG0241	YBR288C	APM3	1	TAG0241	0.421988	1.64258	0.425371	0.418605
1_TAG0242	YJL024C	APS3	1	TAG0242	0.409883	1.69109	0.426916	0.392849
1_TAG0243	YJL222W	VTH2	1	TAG0243	0.434511	1.59524	0.427832	0.441189
1_TAG0245	YOR036W	PEP12	1	TAG0245	0.421146	1.64586	0.440235	0.402058
1_TAG0246	YDR358W	GGA1	1	TAG0246	0.426441	1.62542	0.432985	0.419897
1_TAG0247	YHR108W	GGA2	1	TAG0247	0.408092	1.69851	0.39893	0.417254
1_TAG0248	YJL029C	VPS53	1	TAG0248	0.266884	2.59719	0.277763	0.256004
1_TAG0249	YDR484W	VPS52	1	TAG0249	0.413777	1.67517	0.415171	0.412383
1_TAG0250	YDR027C	VPS54	1	TAG0250	0.283602	2.44408	0.287519	0.279685
1_TAG0251	YKL179C	COY1	1	TAG0251	0.266893	2.5971	0.25357	0.280216
1_TAG0252	YOL062C	APM4	1	TAG0252	0.429112	1.61531	0.413143	0.445081
1_TAG0253	YJL044C	GYP6	1	TAG0253	0.431004	1.60822	0.418363	0.443644
1_TAG0254	YDR137W	RGP1	1	TAG0254	0.329468	2.10383		0.329468
1_TAG0255	YER166W	DNF1	1	TAG0255	0.450617	1.53822	0.454744	0.446489
1_TAG0256	YLR039C	RIC1	1	TAG0256	0.387197	1.79016	0.389224	0.385171
1_TAG0257	YDR093W	DNF2	1	TAG0257	0.452117	1.53311	0.445846	0.458388
1_TAG0258	YPL051W	ARL3	1	TAG0258	0.396718	1.7472	0.402351	0.391085
1_TAG0259	YMR162C	DNF3	1	TAG0259	0.463978	1.49392	0.463723	0.464233
1_TAG0260	YGR142W	BTN2	1	TAG0260	0.456781	1.51746	0.439028	0.474534
1_TAG0261	YLR262C	YPT6	1	TAG0261	0.389084	1.78148	0.39578	0.382389
1_TAG0262	YJL059W	YHC3	1	TAG0262	0.450684	1.53799	0.463419	0.43795
1_TAG0263	YNL051W	COG5	1	TAG0263	0.438035	1.5824	0.446599	0.429471
1_TAG0264	YNL041C	COG6	1	TAG0264	0.419949	1.65055	0.450125	0.389774
1_TAG0265	YML071C	COG8	1	TAG0265	0.431149	1.60768	0.423649	0.438648
1_TAG0266	YGL005C	COG7	1	TAG0266	0.422904	1.63902	0.431521	0.414287
1_TAG0268	YOR275C	RIM20	1	TAG0268	0.429779	1.6128	0.465085	0.394473
1_TAG0269	YOL116W	MSN1	1	TAG0269	0.430756	1.60914	0.434223	0.427288
1_TAG0271	YJR044C	VPS55	1	TAG0271	0.460732	1.50445	0.467801	0.453663
1_TAG0272	YLR360W	VPS38	1	TAG0272	0.480374	1.44293	0.517758	0.44299
1_TAG0273	YAL002W	VPS8	1	TAG0273	0.375032	1.84824	0.391096	0.358968
1_TAG0274	YLR025W	SNF7	1	TAG0274	0.418563	1.65602	0.429328	0.407797
1_TAG0275	YMR077C	VPS20	1	TAG0275	0.455317	1.52234	0.47667	0.433964
1_TAG0276	YKL041W	VPS24	1	TAG0276	0.453212	1.52941	0.484097	0.422327
1_TAG0277	YDR486C	VPS60	1	TAG0277	0.46038	1.5056	0.456646	0.464114
1_TAG0281	YDR492W	IZH1	1	TAG0281	0.422837	1.63928	0.450874	0.394799
1_TAG0282	YLR023C	IZH3	1	TAG0282	0.444844	1.55818	0.438047	0.45164
1_TAG0283	YOL002C	IZH2	1	TAG0283	0.443458	1.56305	0.449829	0.437088
1_TAG0284	YOL101C	IZH4	1	TAG0284	0.419804	1.65112	0.420594	0.419014
1_TAG0285	YMR010W	YMR010W	1	TAG0285	0.408886	1.69521	0.405027	0.412744
1_TAG0286	YHR195W	NVJ1	1	TAG0286	0.418211	1.65741	0.413344	0.423078
1_TAG0287	YGL014W	PUF4	1	TAG0287	0.424049	1.63459	0.417891	0.430208
1_TAG0288	YPL037C	EGD1	1	TAG0288	0.429097	1.61536	0.428596	0.429597
1_TAG0289	YHR193C	EGD2	1	TAG0289	0.434006	1.59709	0.461047	0.406964
1_TAG0290	YCR020C-A	MAK31	1	TAG0290	0.417209	1.66139	0.423669	0.410749
1_TAG0291	YEL053C	MAK10	1	TAG0291	0.442936	1.56489	0.445926	0.439946
1_TAG0292	YPR051W	MAK3	1	TAG0292	0.292924	2.3663	0.299349	0.2865
1_TAG0293	YIL016W	SNL1	1	TAG0293	0.432438	1.60288	0.430897	0.433979
1_TAG0294	YML038C	YMD8	1	TAG0294	0.451713	1.53449	0.457734	0.445692
1_TAG0295	YKL209C	STE6	1	TAG0295	0.418581	1.65595	0.426805	0.410357
1_TAG0296	YDR410C	STE14	1	TAG0296	0.393469	1.76163	0.414412	0.372526
1_TAG0297	YIR004W	DJP1	1	TAG0297	0.436481	1.58804	0.434692	0.43827
1_TAG0298	YNL329C	PEX6	1	TAG0298	0.424893	1.63135	0.468934	0.380851
1_TAG0299	YOR084W	LPX1	1	TAG0299	0.42768	1.62071	0.430256	0.425104
1_TAG0300	YDR265W	PEX10	1	TAG0300	0.397966	1.74172	0.400516	0.395416
1_TAG0301	YMR026C	PEX12	1	TAG0301	0.415679	1.66751	0.407729	0.423629
1_TAG0302	YNL214W	PEX17	1	TAG0302	0.45274	1.53101	0.444202	0.461278
1_TAG0303	YJL210W	PEX2	1	TAG0303	0.404476	1.71369	0.407784	0.401168
1_TAG0304	YPL112C	PEX25	1	TAG0304	0.399363	1.73563	0.40799	0.390736
1_TAG0305	YOR193W	PEX27	1	TAG0305	0.442434	1.56667	0.438183	0.446685
1_TAG0306	YDR479C	PEX29	1	TAG0306	0.427359	1.62193	0.426943	0.427775
1_TAG0307	YKL197C	PEX1	1	TAG0307	0.416766	1.66316	0.416415	0.417117
1_TAG0308	YLR324W	PEX30	1	TAG0308	0.419338	1.65295	0.422298	0.416379
1_TAG0309	YPR128C	ANT1	1	TAG0309	0.497659	1.39282	0.562639	0.432678
1_TAG0310	YDL065C	PEX19	1	TAG0310	0.459292	1.50916	0.444493	0.47409
1_TAG0311	YDR244W	PEX5	1	TAG0311	0.420881	1.6469	0.410686	0.431076
1_TAG0312	YDR142C	PEX7	1	TAG0312	0.434794	1.5942	0.4221	0.447488
1_TAG0313	YOL147C	PEX11	1	TAG0313	0.455514	1.52168	0.456362	0.454665
1_TAG0314	YLR191W	PEX13	1	TAG0314	0.438901	1.57928	0.450259	0.427542
1_TAG0315	YOL044W	PEX15	1	TAG0315	0.4413	1.57069	0.425444	0.457156
1_TAG0316	YDR329C	PEX3	1	TAG0316	0.399939	1.73313	0.39791	0.401968
1_TAG0317	YGR077C	PEX8	1	TAG0317	0.41664	1.66366	0.417529	0.415752
1_TAG0318	YGR133W	PEX4	1	TAG0318	0.411946	1.68262	0.401845	0.422046
1_TAG0319	YML121W	GTR1	1	TAG0319	0.363821	1.90519	0.363516	0.364126
1_TAG0321	YLR292C	SEC72	1	TAG0321	0.42289	1.63907	0.428897	0.416882
1_TAG0322	YHR013C	ARD1	1	TAG0322	0.38036	1.82235	0.382017	0.378702
1_TAG0323	YDL040C	NAT1	1	TAG0323	0.379146	1.82818	0.369463	0.388829
1_TAG0325	YNR032W	PPG1	1	TAG0325	0.411967	1.68253	0.431174	0.392759
1_TAG0326	YGR123C	PPT1	1	TAG0326	0.407126	1.70254	0.402887	0.411365
1_TAG0327	YDR477W	SNF1	1	TAG0327	0.388289	1.78513	0.381746	0.394832
1_TAG0328	YDR490C	PKH1	1	TAG0328	0.4392	1.5782	0.433918	0.444482
1_TAG0329	YKL126W	YPK1	1	TAG0329	0.400468	1.73084	0.380577	0.42036
1_TAG0330	YHR079C	IRE1	1	TAG0330	0.430495	1.61012	0.44231	0.418679
1_TAG0334	YNL265C	IST1	1	TAG0334	0.395241	1.75373	0.395505	0.394977
1_TAG0335	YGR105W	VMA21	1	TAG0335	0.281559	2.46182	0.306219	0.2569
1_TAG0338	YKL119C	VPH2	1	TAG0338	0.278224	2.49133		0.278224
1_TAG0340	YDL122W	UBP1	1	TAG0340	0.399855	1.7335	0.396601	0.403109
1_TAG0341	YLR216C	CPR6	1	TAG0341	0.420893	1.64685	0.406381	0.435406
1_TAG0342	YBR169C	SSE2	1	TAG0342	0.439775	1.57614	0.445539	0.434011
1_TAG0343	YLL024C	SSA2	1	TAG0343	0.405338	1.71005	0.411126	0.39955
1_TAG0344	YDR518W	EUG1	1	TAG0344	0.431608	1.60596	0.428869	0.434348
1_TAG0346	YML078W	CPR3	1	TAG0346	0.419851	1.65093	0.428922	0.410781
1_TAG0347	YOR288C	MPD1	1	TAG0347	0.430081	1.61167	0.436313	0.423849
1_TAG0349	YMR161W	HLJ1	1	TAG0349	0.408573	1.69651	0.413775	0.403371
1_TAG0350	YJL073W	JEM1	1	TAG0350	0.401696	1.72555	0.400197	0.403196
1_TAG0351	YOR357C	SNX3	1	TAG0351	0.43073	1.60924	0.433042	0.428417
1_TAG0352	YDR155C	CPR1	1	TAG0352	0.436144	1.58926	0.434871	0.437417
1_TAG0353	YLR121C	YPS3	1	TAG0353	0.418563	1.65602	0.413213	0.423913
1_TAG0354	YKL010C	UFD4	1	TAG0354	0.426	1.6271	0.42317	0.428831
1_TAG0355	YER100W	UBC6	1	TAG0355	0.405101	1.71105	0.414228	0.395974
1_TAG0356	YLR120C	YPS1	1	TAG0356	0.443505	1.56289	0.44348	0.44353
1_TAG0357	YMR274C	RCE1	1	TAG0357	0.424395	1.63326	0.431078	0.417712
1_TAG0358	YLR250W	SSP120	1	TAG0358	0.422534	1.64045	0.417729	0.42734
1_TAG0359	YPR149W	NCE102	1	TAG0359	0.422301	1.64136	0.429101	0.4155
1_TAG0360	YBR162W-A	YSY6	1	TAG0360	0.435504	1.5916	0.427058	0.44395
1_TAG0362	YDR425W	SNX41	1	TAG0362	0.42137	1.64499	0.426788	0.415951
1_TAG0363	YKL073W	LHS1	1	TAG0363	0.404282	1.71451	0.409357	0.399207
1_TAG0364	YDR313C	PIB1	1	TAG0364	#NUM!	#NUM!		#NUM!
1_TAG0365	YIL005W	EPS1	1	TAG0365	0.422949	1.63884	0.428979	0.416919
1_TAG0366	YDR414C	ERD1	1	TAG0366	0.312735	2.21641	0.291653	0.333816
1_TAG0367	YKL002W	DID4	1	TAG0367	0.45375	1.5276	0.453767	0.453733
1_TAG0368	YPR173C	VPS4	1	TAG0368	0.417079	1.66191	0.405949	0.428208
1_TAG0369	YNR006W	VPS27	1	TAG0369	0.407186	1.70228	0.402239	0.412134
1_TAG0370	YJL053W	PEP8	1	TAG0370	0.411754	1.6834	0.419751	0.403756
1_TAG0371	YJL154C	VPS35	1	TAG0371	0.395477	1.75269	0.401952	0.389002
1_TAG0372	YOR069W	VPS5	1	TAG0372	0.417163	1.66157	0.411326	0.423
1_TAG0374	YBL069W	AST1	1	TAG0374	0.374928	1.84875	0.37962	0.370237
1_TAG0375	YLR246W	ERF2	1	TAG0375	0.402416	1.72246	0.416289	0.388544
1_TAG0376	YOR297C	TIM18	1	TAG0376	0.411824	1.68312	0.404186	0.419462
1_TAG0377	YHR160C	PEX18	1	TAG0377	0.462851	1.49756	0.482563	0.44314
1_TAG0378	YGR239C	PEX21	1	TAG0378	0.38257	1.81182		0.38257
1_TAG0379	YGL153W	PEX14	1	TAG0379	0.42726	1.62231	0.437182	0.417338
1_TAG0380	YAL055W	PEX22	1	TAG0380	0.450706	1.53791	0.448847	0.452566
1_TAG0381	YGR141W	VPS62	1	TAG0381	0.449999	1.54033	0.459392	0.440607
1_TAG0382	YJR126C	VPS70	1	TAG0382	0.40391	1.71609	0.39068	0.41714
1_TAG0383	YMR004W	MVP1	1	TAG0383	0.420221	1.64948	0.424242	0.4162
1_TAG0384	YDR495C	VPS3	1	TAG0384	0.451669	1.53463	0.453706	0.449633
1_TAG0385	YPR139C	LOA1	1	TAG0385	0.34541	2.00674		0.34541
1_TAG0386	YOL082W	ATG19	1	TAG0386	0.435298	1.59235	0.43977	0.430825
1_TAG0388	YML097C	VPS9	1	TAG0388	0.413088	1.67797	0.412028	0.414148
1_TAG0389	YOR359W	VTS1	1	TAG0389	0.435743	1.59072	0.423714	0.447772
1_TAG0390	YHL002W	HSE1	1	TAG0390	0.423568	1.63645	0.438631	0.408505
1_TAG0395	YBL078C	ATG8	1	TAG0395	0.44767	1.54834	0.454345	0.440996
1_TAG0397	YNR007C	ATG3	1	TAG0397	0.428001	1.6195	0.428769	0.427234
1_TAG0398	YLR085C	ARP6	1	TAG0398	0.411535	1.6843	0.396568	0.426502
1_TAG0399	YHR171W	ATG7	1	TAG0399	0.407524	1.70087	0.400903	0.414145
1_TAG0400	YDL149W	ATG9	1	TAG0400	0.443842	1.5617	0.439739	0.447945
1_TAG0401	YKR035W-A	DID2	1	TAG0401	0.439728	1.57631	0.423984	0.455472
1_TAG0402	YKR001C	VPS1	1	TAG0402	0.403777	1.71666	0.40099	0.406564
1_TAG0403	YDR200C	VPS64	1	TAG0403	0.462477	1.49877	0.47492	0.450034
1_TAG0404	YDR485C	VPS72	1	TAG0404	0.417833	1.65891	0.416404	0.419261
1_TAG0405	YFR021W	ATG18	1	TAG0405	0.415733	1.66729	0.418051	0.413415
1_TAG0406	YPL149W	ATG5	1	TAG0406	0.416599	1.66382	0.410171	0.423026
1_TAG0407	YGL124C	MON1	1	TAG0407	0.426863	1.62382	0.416394	0.437332
1_TAG0408	YNL297C	MON2	1	TAG0408	0.414362	1.67281	0.41223	0.416494
1_TAG0409	YBR290W	BSD2	1	TAG0409	0.434247	1.5962	0.448008	0.420487
1_TAG0410	YLR119W	SRN2	1	TAG0410	0.452493	1.53184	0.444231	0.460756
1_TAG0411	YCL008C	STP22	1	TAG0411	0.414226	1.67336	0.394716	0.433736
1_TAG0412	YPL065W	VPS28	1	TAG0412	0.370337	1.87167	0.353714	0.38696
1_TAG0413	YPL002C	SNF8	1	TAG0413	0.413203	1.6775	0.402059	0.424348
1_TAG0414	YJR102C	VPS25	1	TAG0414	0.410933	1.68677	0.386705	0.43516
1_TAG0415	YLR417W	VPS36	1	TAG0415	0.409944	1.69083	0.403807	0.41608
1_TAG0416	YPR049C	ATG11	1	TAG0416	0.425616	1.62857	0.423316	0.427916
1_TAG0417	YPR185W	ATG13	1	TAG0417	0.421396	1.64488	0.407959	0.434833
1_TAG0418	YNL242W	ATG2	1	TAG0418	0.429347	1.61442	0.436043	0.422651
1_TAG0420	YKR020W	VPS51	1	TAG0420	0.346977	1.99767	0.333572	0.360382
1_TAG0421	YCL038C	ATG22	1	TAG0421	0.42185	1.64311	0.424363	0.419337
1_TAG0422	YEL027W	VMA3	1	TAG0422	0.248938	2.78442	0.276496	0.22138
1_TAG0423	YKR014C	YPT52	1	TAG0423	0.408341	1.69747	0.405882	0.4108
1_TAG0424	YNL093W	YPT53	1	TAG0424	0.410211	1.68974	0.410164	0.410257
1_TAG0425	YDL113C	ATG20	1	TAG0425	0.438906	1.57926	0.423031	0.454782
1_TAG0426	YBR217W	ATG12	1	TAG0426	0.417881	1.65872	0.40895	0.426813
1_TAG0427	YPL120W	VPS30	1	TAG0427	0.418113	1.6578	0.427582	0.408645
1_TAG0428	YBR131W	CCZ1	1	TAG0428	0.404885	1.71196	0.433251	0.376519
1_TAG0429	YNL223W	ATG4	1	TAG0429	0.401148	1.72791	0.411343	0.390954
1_TAG0430	YOR089C	VPS21	1	TAG0430	0.392894	1.76421	0.404799	0.38099
1_TAG0431	YML041C	VPS71	1	TAG0431	0.45088	1.53732	0.463688	0.438072
1_TAG0432	YBR164C	ARL1	1	TAG0432	0.347368	1.99543	0.358348	0.336388
1_TAG0433	YPL045W	VPS16	1	TAG0433	0.244262	2.83772	0.246426	0.242098
1_TAG0434	YEL013W	VAC8	1	TAG0434	0.399181	1.73642	0.393242	0.405119
1_TAG0435	YCL057W	PRD1	1	TAG0435	0.429984	1.61203	0.414706	0.445262
1_TAG0437	YGR231C	PHB2	1	TAG0437	0.414951	1.67043	0.414352	0.41555
1_TAG0439	YGR086C	PIL1	1	TAG0439	0.385687	1.79717	0.396538	0.374837
1_TAG0440	YDL100C	GET3	1	TAG0440	0.352484	1.96646	0.376087	0.328882
1_TAG0441	YJR032W	CPR7	1	TAG0441	0.292358	2.37088	0.287932	0.296785
1_TAG0443	YBL075C	SSA3	1	TAG0443	0.41075	1.68751	0.407732	0.413769
1_TAG0445	YDR059C	UBC5	1	TAG0445	0.426418	1.62551	0.418669	0.434167
1_TAG0446	YGR038W	ORM1	1	TAG0446	0.415247	1.66924	0.405348	0.425146
1_TAG0447	YLR350W	ORM2	1	TAG0447	0.415311	1.66898	0.421293	0.409329
1_TAG0448	YCR044C	PER1	1	TAG0448	0.350496	1.97762	0.353578	0.347414
1_TAG0449	YOR132W	VPS17	1	TAG0449	0.411045	1.6863	0.406262	0.415828
1_TAG0451	YML048W	GSF2	1	TAG0451	0.394272	1.75804	0.395154	0.39339
1_TAG0452	YDL018C	ERP3	1	TAG0452	0.425597	1.62865	0.403607	0.447587
1_TAG0453	YOR016C	ERP4	1	TAG0453	0.409046	1.69455	0.400576	0.417516
1_TAG0454	YHR110W	ERP5	1	TAG0454	0.449568	1.54181	0.438135	0.461
1_TAG0455	YPR095C	SYT1	1	TAG0455	0.429651	1.61328	0.418777	0.440525
1_TAG0456	YGL002W	ERP6	1	TAG0456	0.42532	1.62971	0.409705	0.440935
1_TAG0457	YDR229W	IVY1	1	TAG0457	0.451237	1.53611	0.450604	0.451869
1_TAG0458	YJL117W	PHO86	1	TAG0458	0.398584	1.73903	0.39678	0.400387
1_TAG0459	YGL167C	PMR1	1	TAG0459	0.315162	2.19934	0.306461	0.323863
1_TAG0460	YJR010C-A	SPC1	1	TAG0460	0.437062	1.58592	0.442557	0.431567
1_TAG0461	YML055W	SPC2	1	TAG0461	0.418945	1.65451	0.40887	0.429019
1_TAG0462	YDL138W	RGT2	1	TAG0462	0.429139	1.61521	0.417594	0.440683
1_TAG0463	YDL194W	SNF3	1	TAG0463	0.425634	1.62851	0.418404	0.432864
1_TAG0464	YLR330W	CHS5	1	TAG0464	0.413892	1.67471	0.409443	0.41834
1_TAG0465	YMR017W	SPO20	1	TAG0465	0.435663	1.59102	0.432786	0.438539
1_TAG0466	YKR031C	SPO14	1	TAG0466	0.424112	1.63435	0.418308	0.429917
1_TAG0467	YNR049C	MSO1	1	TAG0467	0.412253	1.68136	0.407411	0.417094
1_TAG0468	YPL154C	PEP4	1	TAG0468	0.428699	1.61686	0.434391	0.423007
1_TAG0469	YEL060C	PRB1	1	TAG0469	0.409114	1.69427	0.401867	0.41636
1_TAG0470	YOL031C	SIL1	1	TAG0470	0.445184	1.55699	0.420641	0.469727
1_TAG0471	YER087C-B	SBH1	1	TAG0471	0.422225	1.64165	0.408417	0.436033
1_TAG0472	YLR083C	EMP70	1	TAG0472	0.430336	1.61071	0.419797	0.440876
1_TAG0473	YLL043W	FPS1	1	TAG0473	0.419556	1.6521	0.424131	0.414981
1_TAG0474	YPL084W	BRO1	1	TAG0474	0.414176	1.67356	0.399595	0.428757
1_TAG0475	YER143W	DDI1	1	TAG0475	0.433335	1.59956	0.435052	0.431618
1_TAG0480	YPR036W	VMA13	1	TAG0480	0.275842	2.51284	0.301742	0.249943
1_TAG0481	YOR332W	VMA4	1	TAG0481	0.279414	2.48072	0.296685	0.262142
1_TAG0482	YKL080W	VMA5	1	TAG0482	0.170278	4.07067	0.170278	#NUM!
1_TAG0484	YEL051W	VMA8	1	TAG0484	0.267679	2.58947	0.289475	0.245883
1_TAG0485	YJR033C	RAV1	1	TAG0485	0.434346	1.59584	0.464076	0.404615
1_TAG0486	YHR039C-A	VMA10	1	TAG0486	0.268315	2.58333	0.296019	0.240612
1_TAG0487	YDR456W	NHX1	1	TAG0487	0.30974	2.23783	0.291413	0.328068
1_TAG0488	YDR202C	RAV2	1	TAG0488	0.387105	1.79059	0.38979	0.38442
1_TAG0489	YDL185W	VMA1	1	TAG0489	0.433071	1.60054	0.423973	0.442168
1_TAG0490	YLR447C	VMA6	1	TAG0490	0.283489	2.44506	0.312728	0.254249
1_TAG0491	YOR270C	VPH1	1	TAG0491	0.36741	1.88658	0.380854	0.353967
1_TAG0493	YMR297W	PRC1	1	TAG0493	0.426111	1.62668	0.439367	0.412856
1_TAG0494	YLR373C	VID22	1	TAG0494	0.374154	1.85257	0.377484	0.370825
1_TAG0495	YBR286W	APE3	1	TAG0495	0.392722	1.76498	0.373481	0.411962
1_TAG0496	YKL103C	APE1	1	TAG0496	0.456702	1.51772	0.451957	0.461447
1_TAG0497	YPR079W	MRL1	1	TAG0497	0.430788	1.60902	0.42647	0.435107
1_TAG0498	YHR138C	YHR138C	1	TAG0498	0.424279	1.63371	0.410097	0.438462
1_TAG0499	YER072W	VTC1	1	TAG0499	0.416658	1.66359	0.422552	0.410765
1_TAG0500	YPL019C	VTC3	1	TAG0500	0.420564	1.64814	0.411191	0.429937
1_TAG0502	YNL015W	PBI2	1	TAG0502	0.432591	1.60232	0.431578	0.433603
1_TAG0504	YNL054W	VAC7	1	TAG0504	0.280913	2.46748	0.270552	0.291275
1_TAG0505	YLR386W	VAC14	1	TAG0505	0.370701	1.86983	0.38138	0.360021
1_TAG0506	YDL077C	VAM6	1	TAG0506	0.401824	1.725	0.403846	0.399802
1_TAG0508	YOL018C	TLG2	1	TAG0508	0.39904	1.73704	0.398434	0.399645
1_TAG0509	YLR093C	NYV1	1	TAG0509	0.340176	2.03762	0.337703	0.342648
1_TAG0510	YDR323C	PEP7	1	TAG0510	0.357354	1.93966	0.379016	0.335693
1_TAG0513	YPL232W	SSO1	1	TAG0513	0.413277	1.6772	0.414309	0.412244
1_TAG0514	YOR106W	VAM3	1	TAG0514	0.380513	1.82161	0.378431	0.382594
1_TAG0515	YGL212W	VAM7	1	TAG0515	0.380678	1.82082	0.380567	0.380789
1_TAG0516	YAR031W	PRM9	1	TAG0516	0.427605	1.621	0.42734	0.42787
1_TAG0517	YJL178C	ATG27	1	TAG0517	0.424986	1.63099	0.42209	0.427881
1_TAG0518	YKL135C	APL2	1	TAG0518	0.393259	1.76257	0.398054	0.388463
1_TAG0520	YPL259C	APM1	1	TAG0520	0.408687	1.69604	0.408591	0.408782
1_TAG0521	YHL019C	APM2	1	TAG0521	0.424678	1.63217	0.426086	0.42327
1_TAG0522	YLR170C	APS1	1	TAG0522	0.406981	1.70314	0.400223	0.41374
1_TAG0523	YJR005W	APL1	1	TAG0523	0.416356	1.66479	0.403074	0.429638
1_TAG0524	YBL037W	APL3	1	TAG0524	0.433429	1.59922	0.418953	0.447906
1_TAG0525	YJR058C	APS2	1	TAG0525	0.429529	1.61374	0.43448	0.424578
1_TAG0529	YLR309C	IMH1	1	TAG0529	0.42804	1.61935	0.431772	0.424308
1_TAG0530	YPL249C	GYP5	1	TAG0530	0.425621	1.62856	0.430168	0.421074
1_TAG0531	YPR028W	YOP1	1	TAG0531	0.427683	1.6207	0.435706	0.419661
1_TAG0533	YAL048C	GEM1	1	TAG0533	0.389143	1.78122	0.392264	0.386021
1_TAG0535	YGL023C	PIB2	1	TAG0535	0.442001	1.5682	0.434055	0.449947
1_TAG0536	YJR110W	YMR1	1	TAG0536	0.391026	1.77264	0.397426	0.384625
1_TAG0537	YPL145C	KES1	1	TAG0537	0.421431	1.64475	0.393642	0.44922
1_TAG0538	YCR034W	ELO2	1	TAG0538	0.296357	2.3389	0.287932	0.304781
1_TAG0539	YBR105C	VID24	1	TAG0539	0.416041	1.66606	0.419943	0.412138
1_TAG0540	YER031C	YPT31	1	TAG0540	0.444162	1.56057		0.444162
1_TAG0541	YGL210W	YPT32	1	TAG0541	0.423504	1.63669	0.42305	0.423959
1_TAG0543	YKL176C	LST4	1	TAG0543	0.421389	1.64491	0.438015	0.404763
1_TAG0544	YGR057C	LST7	1	TAG0544	0.384668	1.80194	0.390165	0.37917
1_TAG0577	YBL015W	ACH1	1	TAG0577	0.421864	1.64306		0.421864
1_TAG0578	YGR268C	HUA1	1	TAG0578	0.416231	1.66529	0.414561	0.417901
1_TAG0579	YOR284W	HUA2	1	TAG0579	0.423128	1.63815	0.421414	0.424841
1_TAG0580	YLR144C	ACF2	1	TAG0580	0.41758	1.65992	0.410129	0.42503
1_TAG0581	YJR083C	ACF4	1	TAG0581	0.429917	1.61228	0.423507	0.436326
1_TAG0582	YLR410W	VIP1	1	TAG0582	0.423743	1.63577	0.426656	0.420829
1_TAG0583	YPR154W	PIN3	1	TAG0583	0.431192	1.60751	0.434969	0.427416
1_TAG0584	YJL020C	BBC1	1	TAG0584	0.420268	1.6493	0.414308	0.426227
1_TAG0586	YNL047C	SLM2	1	TAG0586	0.442485	1.56649	0.440925	0.444045
1_TAG0587	YOR239W	ABP140	1	TAG0587	0.415458	1.66839	0.393289	0.437627
1_TAG0589	YOR035C	SHE4	1	TAG0589	0.331261	2.09245	0.339969	0.322553
1_TAG0590	YBR059C	AKL1	1	TAG0590	0.394168	1.75851	0.386796	0.40154
1_TAG0591	YJL100W	LSB6	1	TAG0591	0.432871	1.60128	0.430886	0.434857
1_TAG0593	YFR024C-A	LSB3	1	TAG0593	0.434019	1.59704	0.43539	0.432647
1_TAG0594	YOL112W	MSB4	1	TAG0594	0.42953	1.61374	0.430586	0.428473
1_TAG0596	YNL079C	TPM1	1	TAG0596	0.342835	2.02181	0.343845	0.341826
1_TAG0597	YIL138C	TPM2	1	TAG0597	0.399429	1.73535	0.40873	0.390128
1_TAG0598	YDR245W	MNN10	1	TAG0598	0.252589	2.74417	0.245283	0.259894
1_TAG0599	YIL159W	BNR1	1	TAG0599	0.421985	1.64259	0.419057	0.424914
1_TAG0601	YER149C	PEA2	1	TAG0601	0.410431	1.68883	0.41746	0.403402
1_TAG0602	YNL271C	BNI1	1	TAG0602	0.390015	1.77723	0.382884	0.397146
1_TAG0603	YLL021W	SPA2	1	TAG0603	0.416304	1.665	0.407072	0.425535
1_TAG0604	YLR313C	SPH1	1	TAG0604	0.400498	1.73071	0.432666	0.368329
1_TAG0605	YKR055W	RHO4	1	TAG0605	0.421773	1.64341	0.430837	0.412708
1_TAG0606	YNL094W	APP1	1	TAG0606	0.424637	1.63233	0.433052	0.416223
1_TAG0607	YHR114W	BZZ1	1	TAG0607	0.419516	1.65225	0.419516
1_TAG0608	YNL084C	END3	1	TAG0608	0.411331	1.68513	0.405917	0.416746
1_TAG0609	YLR429W	CRN1	1	TAG0609	0.4337	1.59822	0.423853	0.443548
1_TAG0610	YOR367W	SCP1	1	TAG0610	0.399173	1.73646	0.419492	0.378854
1_TAG0611	YDR129C	SAC6	1	TAG0611	0.404698	1.71275	0.413858	0.395537
1_TAG0612	YDL135C	RDI1	1	TAG0612	0.405301	1.7102	0.39796	0.412641
1_TAG0613	YOR127W	RGA1	1	TAG0613	0.405545	1.70918	0.423328	0.387762
1_TAG0614	YDR379W	RGA2	1	TAG0614	0.433066	1.60056	0.436823	0.429309
1_TAG0615	YLR370C	ARC18	1	TAG0615	0.322702	2.14795		0.322702
1_TAG0616	YJR084W	YJR084W	1	TAG0616	0.438731	1.57989	0.447218	0.430245
1_TAG0617	YDL216C	RRI1	1	TAG0617	0.435377	1.59206		0.435377
1_TAG0618	YMR025W	CSI1	1	TAG0618	0.44514	1.55715	0.442194	0.448085
1_TAG0619	YDR179C	CSN9	1	TAG0619	0.436618	1.58754	0.419053	0.454182
1_TAG0620	YOL117W	RRI2	1	TAG0620	0.424439	1.63309	0.419166	0.429712
1_TAG0621	YNR044W	AGA1	1	TAG0621	0.424403	1.63323	0.433889	0.414918
1_TAG0622	YGL032C	AGA2	1	TAG0622	0.416028	1.66611	0.411054	0.421002
1_TAG0623	YJR004C	SAG1	1	TAG0623	0.403193	1.71914	0.404157	0.402229
1_TAG0625	YGL180W	ATG1	1	TAG0625	0.396607	1.74769	0.406168	0.387046
1_TAG0626	YBR210W	ERV15	1	TAG0626	0.417802	1.65903	0.412534	0.423069
1_TAG0627	YKL007W	CAP1	1	TAG0627	0.413512	1.67624	0.396395	0.430629
1_TAG0628	YIL034C	CAP2	1	TAG0628	0.417507	1.66021	0.440377	0.394637
1_TAG0629	YDL049C	KNH1	1	TAG0629	0.435226	1.59262	0.443119	0.427332
1_TAG0630	YMR306W	FKS3	1	TAG0630	0.422249	1.64156	0.40923	0.435269
1_TAG0631	YMR215W	GAS3	1	TAG0631	0.437371	1.5848	0.450168	0.424575
1_TAG0632	YOL132W	GAS4	1	TAG0632	0.448935	1.54398	0.46043	0.437439
1_TAG0633	YOL030W	GAS5	1	TAG0633	0.423651	1.63613	0.416352	0.430949
1_TAG0634	YLR343W	GAS2	1	TAG0634	0.409303	1.69348	0.417685	0.400921
1_TAG0635	YIR003W	AIM21	1	TAG0635	0.397652	1.7431	0.394869	0.400435
1_TAG0636	YKR100C	SKG1	1	TAG0636	0.43184	1.6051	0.438527	0.425154
1_TAG0637	YNL087W	TCB2	1	TAG0637	0.419817	1.65107	0.424535	0.4151
1_TAG0638	YMR295C	YMR295C	1	TAG0638	0.404626	1.71305	0.420023	0.38923
1_TAG0639	YOR264W	DSE3	1	TAG0639	0.387367	1.78938	0.403207	0.371528
1_TAG0640	YDR348C	PAL1	1	TAG0640	0.408576	1.6965	0.40301	0.414141
1_TAG0641	YPL158C	AIM44	1	TAG0641	0.344863	2.00992	0.359911	0.329814
1_TAG0642	YPL221W	FLC1	1	TAG0642	0.430176	1.61131	0.428154	0.432199
1_TAG0643	YHR149C	SKG6	1	TAG0643	0.384378	1.8033	0.398571	0.370185
1_TAG0644	YCR030C	SYP1	1	TAG0644	0.393203	1.76282	0.405494	0.380911
1_TAG0645	YLR037C	PAU23	1	TAG0645	0.410625	1.68803	0.399045	0.422205
1_TAG0646	YBR301W	PAU24	1	TAG0646	0.432721	1.60183	0.428141	0.437301
1_TAG0647	YJR151C	DAN4	1	TAG0647	0.437155	1.58559	0.423442	0.450868
1_TAG0648	YJL078C	PRY3	1	TAG0648	0.396918	1.74633	0.412305	0.38153
1_TAG0649	YDL037C	BSC1	1	TAG0649	0.427886	1.61993	0.427385	0.428387
1_TAG0650	YNR069C	BSC5	1	TAG0650	0.429615	1.61341	0.420809	0.438422
1_TAG0651	YLR213C	CRR1	1	TAG0651	0.41531	1.66899	0.415966	0.414654
1_TAG0652	YBR033W	EDS1	1	TAG0652	0.435161	1.59285	0.442563	0.42776
1_TAG0654	YLR099C	ICT1	1	TAG0654	0.427342	1.622	0.436526	0.418159
1_TAG0656	YBL066C	SEF1	1	TAG0656	0.425813	1.62782	0.430969	0.420657
1_TAG0657	YFR022W	ROG3	1	TAG0657	0.416605	1.6638	0.42377	0.409441
1_TAG0658	YGL015C	YGL015C	1	TAG0658	0.430654	1.60952	0.439173	0.422135
1_TAG0659	YGL196W	DSD1	1	TAG0659	0.424505	1.63284	0.42412	0.42489
1_TAG0660	YJL046W	AIM22	1	TAG0660	0.392116	1.76771	0.383845	0.400387
1_TAG0662	YKL037W	AIM26	1	TAG0662	0.446046	1.55398	0.446245	0.445848
1_TAG0663	YLR021W	IRC25	1	TAG0663	0.398644	1.73876	0.391048	0.406241
1_TAG0666	YOL003C	PFA4	1	TAG0666	0.436542	1.58781	0.437644	0.43544
1_TAG0667	YPL041C	MRX11	1	TAG0667	0.413637	1.67574	0.404306	0.422967
1_TAG0668	YPL077C	YPL077C	1	TAG0668	0.423229	1.63776	0.417227	0.429231
1_TAG0669	YBR148W	YSW1	1	TAG0669	0.430575	1.60982	0.41678	0.444369
1_TAG0670	YGL110C	CUE3	1	TAG0670	0.438784	1.5797	0.441674	0.435894
1_TAG0671	YOR042W	CUE5	1	TAG0671	0.397556	1.74352	0.419835	0.375278
1_TAG0672	YAL053W	FLC2	1	TAG0672	0.393581	1.76113	0.397938	0.389224
1_TAG0673	YDR248C	YDR248C	1	TAG0673	0.431783	1.60531	0.420123	0.443443
1_TAG0674	YEL020C	YEL020C	1	TAG0674	0.424659	1.63225	0.415085	0.434232
1_TAG0675	YGR237C	YGR237C	1	TAG0675	0.400824	1.72931	0.400045	0.401602
1_TAG0676	YHR033W	YHR033W	1	TAG0676	0.427336	1.62202	0.433102	0.421571
1_TAG0677	YML131W	YML131W	1	TAG0677	0.423991	1.63482	0.392942	0.45504
1_TAG0678	YMR073C	IRC21	1	TAG0678	0.388146	1.78579	0.386768	0.389524
1_TAG0679	YMR124W	EPO1	1	TAG0679	0.411187	1.68572	0.411079	0.411296
1_TAG0680	YNL040W	YNL040W	1	TAG0680	0.41861	1.65583	0.422965	0.414254
1_TAG0681	YJR055W	HIT1	1	TAG0681	0.294745	2.35168	0.310491	0.279
1_TAG0682	YGR136W	LSB1	1	TAG0682	0.421024	1.64634	0.415384	0.426663
1_TAG0683	YBR238C	YBR238C	1	TAG0683	0.396175	1.7496	0.391814	0.400536
1_TAG0685	YLR414C	PUN1	1	TAG0685	0.463472	1.49555	0.476377	0.450567
1_TAG0686	YOL070C	NBA1	1	TAG0686	0.411686	1.68368	0.417056	0.406316
1_TAG0687	YOR304C-A	BIL1	1	TAG0687	0.42071	1.64756	0.406514	0.434907
1_TAG0688	YJL079C	PRY1	1	TAG0688	0.455746	1.52091		0.455746
1_TAG0689	YDR185C	UPS3	1	TAG0689	0.412665	1.67968	0.421196	0.404135
1_TAG0690	YDR233C	RTN1	1	TAG0690	0.409783	1.6915	0.395036	0.424531
1_TAG0691	YBR054W	YRO2	1	TAG0691	0.379277	1.82755	0.392234	0.366319
1_TAG0692	YDR314C	RAD34	1	TAG0692	0.436037	1.58965	0.419289	0.452785
1_TAG0693	YPR045C	THP3	1	TAG0693	0.421918	1.64285	0.422657	0.421178
1_TAG0694	YBL028C	YBL028C	1	TAG0694	0.393219	1.76275	0.399166	0.387273
1_TAG0695	YMR195W	ICY1	1	TAG0695	0.474728	1.46009	0.492563	0.456893
1_TAG0696	YKL161C	KDX1	1	TAG0696	0.382612	1.81162		0.382612
1_TAG0697	YML117W	NAB6	1	TAG0697	0.440541	1.5734	0.439946	0.441136
1_TAG0698	YIL110W	HPM1	1	TAG0698	0.453884	1.52714	0.438649	0.46912
1_TAG0699	YNL063W	MTQ1	1	TAG0699	0.444954	1.5578	0.439697	0.45021
1_TAG0700	YDL178W	DLD2	1	TAG0700	0.4356	1.59125	0.4349	0.436301
1_TAG0701	YGR080W	TWF1	1	TAG0701	0.423995	1.6348	0.410749	0.437242
1_TAG0702	YGR152C	RSR1	1	TAG0702	0.393811	1.7601	0.399761	0.38786
1_TAG0703	YKL092C	BUD2	1	TAG0703	0.40801	1.69885	0.397078	0.418942
1_TAG0705	YEL029C	BUD16	1	TAG0705	0.39765	1.74311	0.36951	0.42579
1_TAG0706	YFL023W	BUD27	1	TAG0706	0.288128	2.40569	0.286451	0.289804
1_TAG0707	YNR027W	BUD17	1	TAG0707	0.425391	1.62943	0.426227	0.424555
1_TAG0708	YOR301W	RAX1	1	TAG0708	0.437567	1.5841	0.445582	0.429551
1_TAG0709	YLR084C	RAX2	1	TAG0709	0.421327	1.64515	0.413985	0.42867
1_TAG0710	YGL174W	BUD13	1	TAG0710	0.321184	2.1581	0.321184	#NUM!
1_TAG0712	YMR014W	BUD22	1	TAG0712	0.221148	3.13431	0.240446	0.201851
1_TAG0714	YJR092W	BUD4	1	TAG0714	0.37084	1.86913	0.358131	0.383549
1_TAG0715	YPR122W	AXL1	1	TAG0715	0.396145	1.74973	0.37942	0.412871
1_TAG0716	YIL140W	AXL2	1	TAG0716	0.417742	1.65927	0.410556	0.424929
1_TAG0717	YCR063W	BUD31	1	TAG0717	0.433555	1.59875	0.436623	0.430486
1_TAG0718	YGR221C	TOS2	1	TAG0718	0.437935	1.58276	0.428747	0.447123
1_TAG0720	YKL159C	RCN1	1	TAG0720	0.44329	1.56364	0.44949	0.43709
1_TAG0721	YGL248W	PDE1	1	TAG0721	0.429708	1.61307	0.42099	0.438425
1_TAG0722	YOR360C	PDE2	1	TAG0722	0.428861	1.61625	0.419827	0.437895
1_TAG0723	YNL127W	FAR11	1	TAG0723	0.397581	1.74341	0.412643	0.38252
1_TAG0724	YFR008W	FAR7	1	TAG0724	0.343086	2.02033	0.343086
1_TAG0725	YMR029C	FAR8	1	TAG0725	0.465413	1.48932	0.467433	0.463392
1_TAG0726	YLR238W	FAR10	1	TAG0726	0.411222	1.68558	0.412212	0.410231
1_TAG0727	YML057W	CMP2	1	TAG0727	0.431236	1.60735	0.430836	0.431636
1_TAG0728	YBR229C	ROT2	1	TAG0728	0.408053	1.69867	0.390253	0.425852
1_TAG0729	YKL046C	DCW1	1	TAG0729	0.416893	1.66265	0.420635	0.413151
1_TAG0730	YEL004W	YEA4	1	TAG0730	0.41578	1.6671	0.418412	0.413148
1_TAG0731	YBL006C	LDB7	1	TAG0731	0.418785	1.65514	0.401861	0.435709
1_TAG0733	YLR020C	YEH2	1	TAG0733	0.425313	1.62974	0.432866	0.417759
1_TAG0734	YJR075W	HOC1	1	TAG0734	0.394137	1.75865	0.400117	0.388156
1_TAG0735	YMR307W	GAS1	1	TAG0735	0.244573	2.83411	0.24999	0.239156
1_TAG0736	YGR282C	BGL2	1	TAG0736	0.430567	1.60985	0.42203	0.439104
1_TAG0737	YDR261C	EXG2	1	TAG0737	0.452534	1.5317	0.475269	0.429799
1_TAG0738	YGL027C	CWH41	1	TAG0738	0.411345	1.68508	0.422074	0.400615
1_TAG0739	YER124C	DSE1	1	TAG0739	0.429982	1.61204	0.428199	0.431766
1_TAG0740	YDR055W	PST1	1	TAG0740	0.439707	1.57638	0.436418	0.442997
1_TAG0741	YEL040W	UTR2	1	TAG0741	0.436458	1.58812	0.44113	0.431787
1_TAG0742	YHR021W-A	ECM12	1	TAG0742	0.436799	1.58688	0.455975	0.417622
1_TAG0743	YBL043W	ECM13	1	TAG0743	0.434579	1.59498	0.421976	0.447182
1_TAG0744	YLR390W	ECM19	1	TAG0744	0.430224	1.61113	0.420257	0.440192
1_TAG0745	YJR106W	ECM27	1	TAG0745	0.429229	1.61487	0.436892	0.421567
1_TAG0746	YHL043W	ECM34	1	TAG0746	0.438478	1.5808	0.434394	0.442562
1_TAG0748	YJL201W	ECM25	1	TAG0748	0.429482	1.61391	0.426231	0.432734
1_TAG0750	YDR528W	HLR1	1	TAG0750	0.467861	1.48152	0.484374	0.451349
1_TAG0751	YHR103W	SBE22	1	TAG0751	0.412545	1.68017	0.403483	0.421607
1_TAG0752	YBL001C	ECM15	1	TAG0752	0.413869	1.6748	0.403542	0.424195
1_TAG0753	YDR351W	SBE2	1	TAG0753	0.419268	1.65323	0.417812	0.420723
1_TAG0754	YBR005W	RCR1	1	TAG0754	0.429713	1.61305	0.429664	0.429762
1_TAG0755	YLR443W	ECM7	1	TAG0755	0.433127	1.60033	0.436815	0.42944
1_TAG0756	YGR023W	MTL1	1	TAG0756	0.417362	1.66078	0.406574	0.428149
1_TAG0758	YBR078W	ECM33	1	TAG0758	0.414378	1.67274	0.410991	0.417766
1_TAG0759	YDR446W	ECM11	1	TAG0759	0.452337	1.53237	0.450673	0.454001
1_TAG0760	YHR132C	ECM14	1	TAG0760	0.414292	1.67309	0.409288	0.419295
1_TAG0761	YDR293C	SSD1	1	TAG0761	0.430992	1.60826	0.422429	0.439556
1_TAG0762	YKL096W	CWP1	1	TAG0762	0.40115	1.7279	0.385229	0.417072
1_TAG0763	YJL159W	HSP150	1	TAG0763	0.432815	1.60149	0.429462	0.436168
1_TAG0764	YNL322C	KRE1	1	TAG0764	0.352395	1.96696	0.335658	0.369131
1_TAG0765	YKL163W	PIR3	1	TAG0765	0.419055	1.65407	0.424559	0.413552
1_TAG0767	YJL158C	CIS3	1	TAG0767	0.42408	1.63447	0.41692	0.43124
1_TAG0768	YLR390W-A	CCW14	1	TAG0768	0.418365	1.6568	0.421388	0.415342
1_TAG0769	YBR067C	TIP1	1	TAG0769	0.422805	1.6394	0.435819	0.409791
1_TAG0770	YGR032W	GSC2	1	TAG0770	0.446556	1.55221	0.438869	0.454242
1_TAG0771	YLR342W	FKS1	1	TAG0771	0.337525	2.05362	0.323755	0.351295
1_TAG0772	YLR433C	CNA1	1	TAG0772	0.426806	1.62403	0.445549	0.408063
1_TAG0773	YKL190W	CNB1	1	TAG0773	0.426341	1.62581	0.435534	0.417147
1_TAG0774	YLR300W	EXG1	1	TAG0774	0.364424	1.90203	0.383477	0.345372
1_TAG0775	YHR143W	DSE2	1	TAG0775	0.413318	1.67703	0.412992	0.413644
1_TAG0776	YGR143W	SKN1	1	TAG0776	0.421078	1.64613	0.413047	0.429109
1_TAG0777	YPR159W	KRE6	1	TAG0777	0.287847	2.40804	0.27613	0.299565
1_TAG0778	YNL090W	RHO2	1	TAG0778	0.454633	1.52463	0.444994	0.464271
1_TAG0780	YPL053C	KTR6	1	TAG0780	0.434042	1.59696	0.424732	0.443352
1_TAG0781	YNL029C	KTR5	1	TAG0781	0.431007	1.6082	0.435509	0.426505
1_TAG0782	YIL085C	KTR7	1	TAG0782	0.430039	1.61183	0.425059	0.435018
1_TAG0783	YBR205W	KTR3	1	TAG0783	0.410812	1.68726	0.424429	0.397195
1_TAG0784	YHR030C	SLT2	1	TAG0784	0.410635	1.68799	0.42071	0.40056
1_TAG0785	YCR017C	CWH43	1	TAG0785	0.415365	1.66876	0.41221	0.418521
1_TAG0786	YLR110C	CCW12	1	TAG0786	0.359693	1.92705	0.37669	0.342697
1_TAG0787	YOL109W	ZEO1	1	TAG0787	0.401084	1.72818	0.393488	0.408681
1_TAG0788	YGR229C	SMI1	1	TAG0788	0.354893	1.95312	0.349236	0.36055
1_TAG0789	YDR420W	HKR1	1	TAG0789	0.421173	1.64575	0.422928	0.419418
1_TAG0790	YCL048W	SPS22	1	TAG0790	0.431955	1.60467	0.427163	0.436748
1_TAG0791	YGL178W	MPT5	1	TAG0791	0.419392	1.65274	0.429308	0.409476
1_TAG0793	YBL007C	SLA1	1	TAG0793	0.278475	2.48908	0.286134	0.270816
1_TAG0795	YLR425W	TUS1	1	TAG0795	0.373799	1.85433		0.373799
1_TAG0796	YLR371W	ROM2	1	TAG0796	0.335035	2.06888	0.361834	0.308235
1_TAG0797	YGR070W	ROM1	1	TAG0797	0.419423	1.65262	0.423252	0.415595
1_TAG0798	YER155C	BEM2	1	TAG0798	0.365312	1.89741	0.345356	0.385268
1_TAG0799	YKL096W-A	CWP2	1	TAG0799	0.432147	1.60396	0.430551	0.433744
1_TAG0800	YKL164C	PIR1	1	TAG0800	0.417785	1.6591	0.429461	0.406109
1_TAG0801	YGR059W	SPR3	1	TAG0801	0.417078	1.66191	0.407727	0.426429
1_TAG0802	YDR218C	SPR28	1	TAG0802	0.412448	1.68057	0.428492	0.396403
1_TAG0803	YJR137C	MET5	1	TAG0803	0.410453	1.68874	0.41558	0.405326
1_TAG0804	YCL051W	LRE1	1	TAG0804	0.407594	1.70058	0.405522	0.409666
1_TAG0805	YNL283C	WSC2	1	TAG0805	0.387074	1.79073	0.400296	0.373852
1_TAG0806	YHL028W	WSC4	1	TAG0806	0.425891	1.62752	0.42727	0.424513
1_TAG0807	YLR332W	MID2	1	TAG0807	0.404209	1.71482	0.411535	0.396882
1_TAG0808	YOL105C	WSC3	1	TAG0808	0.444271	1.56019	0.444271
1_TAG0809	YOR008C	SLG1	1	TAG0809	0.366043	1.89362	0.363223	0.368863
1_TAG0811	YDL223C	HBT1	1	TAG0811	0.419518	1.65225	0.416631	0.422404
1_TAG0812	YNL325C	FIG4	1	TAG0812	0.447218	1.54991	0.436912	0.457523
1_TAG0813	YCR089W	FIG2	1	TAG0813	0.440797	1.57249		0.440797
1_TAG0814	YBR040W	FIG1	1	TAG0814	0.416764	1.66316	0.395433	0.438095
1_TAG0815	YNR032C-A	HUB1	1	TAG0815	0.428957	1.61589	0.425264	0.432649
1_TAG0816	YAR014C	BUD14	1	TAG0816	0.363022	1.90938	0.360517	0.365527
1_TAG0817	YHR158C	KEL1	1	TAG0817	0.433991	1.59715	0.44311	0.424871
1_TAG0818	YNL233W	BNI4	1	TAG0818	0.405886	1.70774	0.402009	0.409764
1_TAG0819	YMR022W	UBC7	1	TAG0819	0.41403	1.67415	0.419324	0.408737
1_TAG0820	YGR279C	SCW4	1	TAG0820	0.405461	1.70953	0.402085	0.408836
1_TAG0821	YMR305C	SCW10	1	TAG0821	0.416839	1.66286	0.419051	0.414627
1_TAG0822	YGR238C	KEL2	1	TAG0822	0.404693	1.71277	0.405197	0.404189
1_TAG0823	YBR129C	OPY1	1	TAG0823	0.435053	1.59325	0.430858	0.439249
1_TAG0824	YJL108C	PRM10	1	TAG0824	0.410306	1.68934	0.412997	0.407615
1_TAG0825	YIL037C	PRM2	1	TAG0825	0.41991	1.65071	0.40641	0.433409
1_TAG0826	YPL156C	PRM4	1	TAG0826	0.439392	1.57752	0.447127	0.431656
1_TAG0827	YIL117C	PRM5	1	TAG0827	0.435596	1.59126	0.431374	0.439818
1_TAG0828	YML047C	PRM6	1	TAG0828	0.43594	1.59001	0.434222	0.437658
1_TAG0830	YJL170C	ASG7	1	TAG0830	0.425295	1.6298	0.42867	0.42192
1_TAG0831	YCL027W	FUS1	1	TAG0831	0.436564	1.58773	0.428297	0.444832
1_TAG0832	YKL032C	IXR1	1	TAG0832	0.37547	1.84608	0.379186	0.371754
1_TAG0833	YOR067C	ALG8	1	TAG0833	0.408419	1.69715	0.395849	0.420988
1_TAG0834	YMR015C	ERG5	1	TAG0834	0.422303	1.64135	0.42002	0.424586
1_TAG0835	YLR056W	ERG3	1	TAG0835	0.328224	2.11181	0.331666	0.324782
1_TAG0838	YGL012W	ERG4	1	TAG0838	#NUM!	#NUM!		#NUM!
1_TAG0839	YML075C	HMG1	1	TAG0839	0.420498	1.6484	0.40768	0.433316
1_TAG0840	YLR450W	HMG2	1	TAG0840	0.443354	1.56342	0.437069	0.449639
1_TAG0841	YER044C	ERG28	1	TAG0841	0.222685	3.11268	0.244611	0.200759
1_TAG0842	YML008C	ERG6	1	TAG0842	0.366147	1.89308	0.345551	0.386743
1_TAG0843	YOR188W	MSB1	1	TAG0843	0.433664	1.59835	0.433533	0.433795
1_TAG0844	YPL161C	BEM4	1	TAG0844	0.363581	1.90644	0.364002	0.363161
1_TAG0845	YML109W	ZDS2	1	TAG0845	0.433944	1.59732	0.423979	0.443909
1_TAG0846	YGR014W	MSB2	1	TAG0846	0.432044	1.60435	0.421973	0.442114
1_TAG0847	YBL085W	BOI1	1	TAG0847	0.433707	1.59819	0.45529	0.412123
1_TAG0848	YER114C	BOI2	1	TAG0848	0.432034	1.60438	0.42903	0.435037
1_TAG0849	YBR200W	BEM1	1	TAG0849	0.42814	1.61897	0.423328	0.432953
1_TAG0850	YCR088W	ABP1	1	TAG0850	0.411871	1.68292	0.410705	0.413037
1_TAG0851	YMR273C	ZDS1	1	TAG0851	0.423707	1.63591	0.413695	0.433719
1_TAG0852	YPL115C	BEM3	1	TAG0852	0.435586	1.5913	0.435051	0.43612
1_TAG0853	YHR061C	GIC1	1	TAG0853	0.424971	1.63105	0.414296	0.435646
1_TAG0854	YDR309C	GIC2	1	TAG0854	0.417077	1.66192	0.406591	0.427563
1_TAG0856	YAR050W	FLO1	1	TAG0856	0.391961	1.76841	0.397502	0.386421
1_TAG0857	YKR102W	FLO10	1	TAG0857	0.427284	1.62222	0.423037	0.43153
1_TAG0858	YHR211W	FLO5	1	TAG0858	0.429416	1.61416	0.448756	0.410075
1_TAG0859	YAL063C	FLO9	1	TAG0859	0.441079	1.57148	0.441025	0.441133
1_TAG0860	YLR299W	ECM38	1	TAG0860	0.435102	1.59307	0.435865	0.434339
1_TAG0861	YPL180W	TCO89	1	TAG0861	0.366192	1.89285	0.390704	0.34168
1_TAG0862	YJL062W	LAS21	1	TAG0862	0.352559	1.96605	0.376425	0.328692
1_TAG0863	YOR107W	RGS2	1	TAG0863	0.435047	1.59327	0.421428	0.448666
1_TAG0864	YKL130C	SHE2	1	TAG0864	0.422904	1.63902	0.441814	0.403994
1_TAG0865	YAL029C	MYO4	1	TAG0865	0.414044	1.67409	0.421343	0.406745
1_TAG0866	YBR130C	SHE3	1	TAG0866	0.405068	1.71119	0.425788	0.384348
1_TAG0867	YML006C	GIS4	1	TAG0867	0.421539	1.64433	0.418158	0.424919
1_TAG0868	YLR094C	GIS3	1	TAG0868	0.425535	1.62888	0.417525	0.433546
1_TAG0870	YPL049C	DIG1	1	TAG0870	0.36025	1.92407	0.378766	0.341734
1_TAG0871	YDR480W	DIG2	1	TAG0871	0.421073	1.64614	0.420906	0.421241
1_TAG0872	YGR040W	KSS1	1	TAG0872	0.430311	1.61081	0.431693	0.428929
1_TAG0873	YBR095C	RXT2	1	TAG0873	0.366042	1.89362	0.379857	0.352228
1_TAG0874	YOR080W	DIA2	1	TAG0874	0.418953	1.65447	0.417876	0.420031
1_TAG0875	YPL192C	PRM3	1	TAG0875	0.445624	1.55545	0.443266	0.447981
1_TAG0876	YMR065W	KAR5	1	TAG0876	0.391883	1.76876		0.391883
1_TAG0877	YMR313C	TGL3	1	TAG0877	0.425729	1.62814	0.418067	0.43339
1_TAG0879	YKL116C	PRR1	1	TAG0879	0.415996	1.66624	0.424848	0.407143
1_TAG0881	YIL113W	SDP1	1	TAG0881	0.420376	1.64887	0.415106	0.425647
1_TAG0882	YDR466W	PKH3	1	TAG0882	0.427064	1.62305	0.43133	0.422798
1_TAG0883	YDL227C	HO	1	TAG0883	0.390974	1.77287	0.369114	0.412835
1_TAG0884	YMR275C	BUL1	1	TAG0884	0.446179	1.55352	0.421823	0.470534
1_TAG0886	YOR320C	GNT1	1	TAG0886	0.442321	1.56707	0.436458	0.448184
1_TAG0887	YGL226C-A	OST5	1	TAG0887	0.409166	1.69405	0.393687	0.424644
1_TAG0888	YPL227C	ALG5	1	TAG0888	0.413753	1.67527	0.437164	0.390341
1_TAG0889	YJR131W	MNS1	1	TAG0889	0.425528	1.62891	0.44211	0.408946
1_TAG0890	YBR199W	KTR4	1	TAG0890	0.421152	1.64584	0.426244	0.41606
1_TAG0891	YEL036C	ANP1	1	TAG0891	0.300482	2.30679	0.264372	0.336592
1_TAG0893	YML115C	VAN1	1	TAG0893	0.276235	2.50926	0.280035	0.272436
1_TAG0894	YDL232W	OST4	1	TAG0894	#NUM!	#NUM!		#NUM!
1_TAG0895	YGR227W	DIE2	1	TAG0895	0.411672	1.68374	0.435408	0.387937
1_TAG0896	YKR061W	KTR2	1	TAG0896	0.447556	1.54874	0.452811	0.442302
1_TAG0897	YJL139C	YUR1	1	TAG0897	0.407657	1.70032	0.400818	0.414497
1_TAG0898	YGR036C	CAX4	1	TAG0898	0.140668	4.92755		0.140668
1_TAG0899	YGL257C	MNT2	1	TAG0899	0.418978	1.65438	0.409407	0.428549
1_TAG0900	YIL014W	MNT3	1	TAG0900	0.42764	1.62087	0.428011	0.427268
1_TAG0901	YNR059W	MNT4	1	TAG0901	0.416923	1.66253	0.412982	0.420863
1_TAG0902	YAL023C	PMT2	1	TAG0902	0.41022	1.6897	0.413792	0.406648
1_TAG0903	YOR321W	PMT3	1	TAG0903	0.449405	1.54236	0.440581	0.458229
1_TAG0904	YJR143C	PMT4	1	TAG0904	0.4254	1.6294	0.430874	0.419926
1_TAG0905	YDL093W	PMT5	1	TAG0905	0.419007	1.65426	0.430115	0.4079
1_TAG0906	YGR199W	PMT6	1	TAG0906	0.448001	1.5472	0.448769	0.447233
1_TAG0907	YDL095W	PMT1	1	TAG0907	0.423718	1.63587	0.412195	0.435241
1_TAG0908	YDR483W	KRE2	1	TAG0908	0.425029	1.63082	0.41355	0.436508
1_TAG0909	YOR099W	KTR1	1	TAG0909	0.402854	1.72059	0.398067	0.40764
1_TAG0910	YER001W	MNN1	1	TAG0910	0.424047	1.6346	0.407522	0.440572
1_TAG0911	YBR260C	RGD1	1	TAG0911	0.410197	1.68979	0.430421	0.389973
1_TAG0912	YLR006C	SSK1	1	TAG0912	0.42745	1.62159	0.481361	0.373539
1_TAG0913	YOR219C	STE13	1	TAG0913	0.465225	1.48992	0.467728	0.462723
1_TAG0914	YJR117W	STE24	1	TAG0914	0.413991	1.6743	0.420318	0.407665
1_TAG0916	YLR133W	CKI1	1	TAG0916	0.407483	1.70104	0.41294	0.402027
1_TAG0917	YNL130C	CPT1	1	TAG0917	0.423969	1.6349	0.419289	0.428649
1_TAG0918	YGR157W	CHO2	1	TAG0918	0.413043	1.67815	0.411238	0.414848
1_TAG0919	YJR073C	OPI3	1	TAG0919	0.412799	1.67914	0.410928	0.41467
1_TAG0920	YNL169C	PSD1	1	TAG0920	0.404977	1.71157	0.393908	0.416046
1_TAG0921	YGR202C	PCT1	1	TAG0921	0.433597	1.5986	0.42265	0.444545
1_TAG0923	YOL011W	PLB3	1	TAG0923	0.394808	1.75566	0.419251	0.370364
1_TAG0924	YBR042C	CST26	1	TAG0924	0.408527	1.6967	0.407723	0.409332
1_TAG0926	YBL011W	SCT1	1	TAG0926	0.384746	1.80157	0.376444	0.393048
1_TAG0927	YPR140W	TAZ1	1	TAG0927	0.429831	1.6126	0.432303	0.42736
1_TAG0928	YGL126W	SCS3	1	TAG0928	#NUM!	#NUM!
1_TAG0929	YBR030W	RKM3	1	TAG0929	0.434443	1.59549	0.433122	0.435763
1_TAG0930	YDR503C	LPP1	1	TAG0930	0.433899	1.59749	0.423071	0.444727
1_TAG0931	YNL279W	PRM1	1	TAG0931	0.409815	1.69137	0.422506	0.397124
1_TAG0932	YMR232W	FUS2	1	TAG0932	0.448457	1.54563	0.452447	0.444468
1_TAG0933	YNL053W	MSG5	1	TAG0933	0.432792	1.60157	0.433881	0.431704
1_TAG0934	YDR075W	PPH3	1	TAG0934	0.407876	1.69941	0.407112	0.408639
1_TAG0935	YDL006W	PTC1	1	TAG0935	0.390407	1.77545	0.385906	0.394907
1_TAG0936	YBL056W	PTC3	1	TAG0936	0.389436	1.77987	0.400407	0.378466
1_TAG0937	YER075C	PTP3	1	TAG0937	#NUM!	#NUM!
1_TAG0939	YNL048W	ALG11	1	TAG0939	0.422882	1.6391	0.429208	0.416557
1_TAG0940	YBR015C	MNN2	1	TAG0940	0.374809	1.84934	0.376033	0.373584
1_TAG0941	YJL186W	MNN5	1	TAG0941	0.423717	1.63587	0.428257	0.419177
1_TAG0943	YEL042W	GDA1	1	TAG0943	0.409517	1.6926	0.398326	0.420708
1_TAG0944	YER005W	YND1	1	TAG0944	0.404778	1.71241	0.405899	0.403658
1_TAG0945	YMR101C	SRT1	1	TAG0945	0.415939	1.66646	0.420218	0.41166
1_TAG0946	YBL082C	ALG3	1	TAG0946	0.392804	1.76461	0.400299	0.385309
1_TAG0947	YNR030W	ALG12	1	TAG0947	0.402906	1.72037	0.38923	0.416582
1_TAG0948	YEL031W	SPF1	1	TAG0948	0.353383	1.96146	0.356247	0.350519
1_TAG0949	YNL219C	ALG9	1	TAG0949	0.403582	1.71749	0.393938	0.413225
1_TAG0950	YOR002W	ALG6	1	TAG0950	0.383946	1.80532	0.392599	0.375294
1_TAG0951	YHR082C	KSP1	1	TAG0951	0.412746	1.67936	0.423124	0.402368
1_TAG0952	YER027C	GAL83	1	TAG0952	0.426491	1.62523	0.422942	0.43004
1_TAG0953	YOL016C	CMK2	1	TAG0953	0.431484	1.60643	0.417945	0.445023
1_TAG0954	YFR014C	CMK1	1	TAG0954	0.410577	1.68823	0.41594	0.405215
1_TAG0955	YHR135C	YCK1	1	TAG0955	0.425033	1.63081	0.43098	0.419086
1_TAG0956	YNL154C	YCK2	1	TAG0956	0.435986	1.58984	0.444138	0.427833
1_TAG0957	YNL307C	MCK1	1	TAG0957	0.383656	1.80669	0.373842	0.393471
1_TAG0958	YBL016W	FUS3	1	TAG0958	0.383669	1.80663	0.402984	0.364354
1_TAG0959	YLR113W	HOG1	1	TAG0959	0.462344	1.4992	0.458448	0.466241
1_TAG0960	YPR054W	SMK1	1	TAG0960	0.411683	1.68369	0.403515	0.419851
1_TAG0961	YOR231W	MKK1	1	TAG0961	0.411139	1.68592	0.421662	0.400616
1_TAG0963	YPL140C	MKK2	1	TAG0963	0.435661	1.59103	0.435002	0.436319
1_TAG0964	YCR073C	SSK22	1	TAG0964	0.396342	1.74886		0.396342
1_TAG0967	YJL095W	BCK1	1	TAG0967	0.442252	1.56731	0.431997	0.452507
1_TAG0969	YNL298W	CLA4	1	TAG0969	0.412345	1.68099	0.43332	0.391369
1_TAG0970	YNL020C	ARK1	1	TAG0970	0.450896	1.53727	0.450202	0.451589
1_TAG0971	YOL113W	SKM1	1	TAG0971	0.412556	1.68013	0.420863	0.40425
1_TAG0972	YGR262C	BUD32	1	TAG0972	0.424622	1.63238	0.434557	0.414688
1_TAG0973	YDR523C	SPS1	1	TAG0973	0.422231	1.64163	0.426665	0.417797
1_TAG0975	YJL164C	TPK1	1	TAG0975	0.424076	1.63449	0.418668	0.429483
1_TAG0976	YPL203W	TPK2	1	TAG0976	0.425541	1.62886	0.442952	0.40813
1_TAG0977	YKL166C	TPK3	1	TAG0977	0.409553	1.69245		0.409553
1_TAG0979	YIL015W	BAR1	1	TAG0979	0.449795	1.54103	0.464502	0.435088
1_TAG0980	YOR003W	YSP3	1	TAG0980	0.417409	1.6606	0.417719	0.417098
1_TAG0981	YHL030W	ECM29	1	TAG0981	0.420213	1.64951	0.426279	0.414148
1_TAG0982	YHR184W	SSP1	1	TAG0982	0.425053	1.63073	0.430331	0.419775
1_TAG0983	YDL239C	ADY3	1	TAG0983	0.408583	1.69646	0.427799	0.389368
1_TAG0984	YOR124C	UBP2	1	TAG0984	0.419794	1.65116	0.412131	0.427457
1_TAG0985	YER151C	UBP3	1	TAG0985	0.350222	1.97916	0.354152	0.346292
1_TAG0986	YKL117W	SBA1	1	TAG0986	0.439315	1.57779	0.434564	0.444067
1_TAG0987	YPL106C	SSE1	1	TAG0987	0.334193	2.0741	0.336504	0.331881
1_TAG0988	YMR214W	SCJ1	1	TAG0988	0.406299	1.706	0.396349	0.416249
1_TAG0989	YML111W	BUL2	1	TAG0989	0.414477	1.67234	0.414053	0.414901
1_TAG0990	YJR036C	HUL4	1	TAG0990	0.40622	1.70633	0.419692	0.392748
1_TAG0991	YGL141W	HUL5	1	TAG0991	0.420537	1.64824	0.419158	0.421916
1_TAG0993	YLR389C	STE23	1	TAG0993	0.437435	1.58457	0.419456	0.455414
1_TAG0994	YDR251W	PAM1	1	TAG0994	0.430781	1.60905	0.418867	0.442694
1_TAG0996	YPL021W	ECM23	1	TAG0996	0.431131	1.60774	0.426188	0.436073
1_TAG0997	YOR032C	HMS1	1	TAG0997	0.434827	1.59408	0.420462	0.449192
1_TAG0998	YMR016C	SOK2	1	TAG0998	0.412012	1.68235	0.400419	0.423606
1_TAG0999	YDL024C	DIA3	1	TAG0999	0.45038	1.53903	0.447338	0.453421
1_TAG1000	YDL035C	GPR1	1	TAG1000	0.435216	1.59265	0.421446	0.448985
1_TAG1001	YMR238W	DFG5	1	TAG1001	0.407105	1.70262	0.401552	0.412658
1_TAG1002	YLR353W	BUD8	1	TAG1002	0.443239	1.56382	0.436555	0.449924
1_TAG1003	YMR316W	DIA1	1	TAG1003	0.438982	1.57899	0.420234	0.45773
1_TAG1004	YIR019C	FLO11	1	TAG1004	0.419279	1.65319	0.406285	0.432274
1_TAG1005	YER118C	SHO1	1	TAG1005	0.451639	1.53474	0.451639
1_TAG1007	YJR153W	PGU1	1	TAG1007	0.445011	1.5576	0.441679	0.448342
1_TAG1008	YCR038C	BUD5	1	TAG1008	0.412801	1.67913	0.420601	0.405001
1_TAG1009	YER109C	FLO8_noSGDORF	1	TAG1009	0.447315	1.54957	0.456656	0.437973
1_TAG1010	YMR164C	MSS11	1	TAG1010	0.444499	1.55939	0.440517	0.448481
1_TAG1011	YBR083W	TEC1	1	TAG1011	0.439204	1.57819	0.423476	0.454932
1_TAG1013	YOL081W	IRA2	1	TAG1013	0.410826	1.68721	0.418391	0.40326
1_TAG1014	YLL016W	SDC25_noSGDORF	1	TAG1014	0.432267	1.60352	0.427085	0.437449
1_TAG1015	YNL138W	SRV2	1	TAG1015	#NUM!	#NUM!	#NUM!
1_TAG1016	YMR172W	HOT1	1	TAG1016	0.425929	1.62738	0.421212	0.430647
1_TAG1018	YDR496C	PUF6	1	TAG1018	0.359806	1.92645	0.361405	0.358208
1_TAG1019	YCR097W	HMRA1	1	TAG1019	#NUM!	#NUM!
1_TAG1020	YOR129C	AFI1	1	TAG1020	0.416609	1.66378	0.415732	0.417486
1_TAG1021	YPL004C	LSP1	1	TAG1021	0.402762	1.72098		0.402762
1_TAG1022	YDR162C	NBP2	1	TAG1022	0.381187	1.81839	0.382803	0.379571
1_TAG1023	YBR086C	IST2	1	TAG1023	0.401874	1.72479	0.401279	0.402468
1_TAG1024	YMR175W	SIP18	1	TAG1024	0.419979	1.65043	0.42409	0.415868
1_TAG1025	YMR092C	AIP1	1	TAG1025	0.425669	1.62837	0.417659	0.433679
1_TAG1026	YPL152W	RRD2	1	TAG1026	0.422286	1.64142	0.414728	0.429843
1_TAG1028	YKL026C	GPX1	1	TAG1028	0.429878	1.61243	0.424281	0.435475
1_TAG1029	YBR244W	GPX2	1	TAG1029	0.44268	1.5658	0.441001	0.444359
1_TAG1030	YPL196W	OXR1	1	TAG1030	0.426687	1.62449	0.421774	0.4316
1_TAG1031	YCL033C	MXR2	1	TAG1031	0.432421	1.60294	0.439418	0.425425
1_TAG1032	YER042W	MXR1	1	TAG1032	0.428189	1.61879	0.43116	0.425219
1_TAG1033	YIR037W	HYR1	1	TAG1033	0.401896	1.72469	0.398541	0.405251
1_TAG1034	YER174C	GRX4	1	TAG1034	0.428848	1.6163	0.429269	0.428427
1_TAG1035	YDR098C	GRX3	1	TAG1035	0.427529	1.62129	0.435596	0.419462
1_TAG1036	YCL035C	GRX1	1	TAG1036	0.42023	1.64945		0.42023
1_TAG1037	YFL026W	STE2	1	TAG1037	0.435317	1.59228	0.439276	0.431357
1_TAG1038	YNL091W	NST1	1	TAG1038	#NUM!	#NUM!
1_TAG1039	YER019W	ISC1	1	TAG1039	0.42886	1.61626	0.418554	0.439166
1_TAG1040	YNR074C	AIF1	1	TAG1040	0.44673	1.5516	0.46061	0.432851
1_TAG1041	YOR010C	TIR2	1	TAG1041	0.416831	1.6629	0.420603	0.413059
1_TAG1042	YOR324C	FRT1	1	TAG1042	0.416913	1.66257	0.420258	0.413568
1_TAG1043	YAL028W	FRT2	1	TAG1043	0.443961	1.56128	0.442571	0.44535
1_TAG1044	YGR234W	YHB1	1	TAG1044	0.425463	1.62916	0.441115	0.409811
1_TAG1045	YOL151W	GRE2	1	TAG1045	0.448774	1.54453	0.433739	0.46381
1_TAG1046	YER011W	TIR1	1	TAG1046	0.429049	1.61554	0.413424	0.444673
1_TAG1047	YPL240C	HSP82	1	TAG1047	0.425752	1.62805	0.43951	0.411995
1_TAG1048	YIL033C	BCY1	1	TAG1048	0.41876	1.65524	0.438082	0.399438
1_TAG1049	YDR017C	KCS1	1	TAG1049	0.369136	1.87776	0.367506	0.370766
1_TAG1050	YNL160W	YGP1	1	TAG1050	0.364587	1.90118	0.364833	0.364341
1_TAG1051	YPL223C	GRE1	1	TAG1051	0.42234	1.64121	0.43932	0.40536
1_TAG1052	YDR184C	ATC1	1	TAG1052	0.422285	1.64142	0.41388	0.43069
1_TAG1053	YBR082C	UBC4	1	TAG1053	0.362819	1.91045	0.352264	0.373374
1_TAG1054	YDR171W	HSP42	1	TAG1054	0.431581	1.60607	0.419492	0.443669
1_TAG1055	YHL048W	COS8	1	TAG1055	0.410998	1.6865	0.424853	0.397144
1_TAG1057	YPR040W	TIP41	1	TAG1057	0.391717	1.76951	0.404704	0.378729
1_TAG1058	YIL047C	SYG1	1	TAG1058	0.441445	1.57018	0.478184	0.404706
1_TAG1059	YBR077C	SLM4	1	TAG1059	0.35258	1.96593	0.362775	0.342384
1_TAG1060	YGL121C	GPG1	1	TAG1060	0.431579	1.60607	0.413803	0.449355
1_TAG1061	YOR371C	GPB1	1	TAG1061	0.427044	1.62313	0.422739	0.431349
1_TAG1066	YNL145W	MFA2	1	TAG1066	0.419732	1.6514	0.426986	0.412479
1_TAG1069	YNL173C	MDG1	1	TAG1069	0.422581	1.64027	0.418422	0.426739
1_TAG1072	YDR085C	AFR1	1	TAG1072	0.396002	1.75036	0.402687	0.389317
1_TAG1074	YDR284C	DPP1	1	TAG1074	0.397691	1.74293	0.405498	0.389885
1_TAG1075	YFL047W	RGD2	1	TAG1075	0.42681	1.62402	0.423776	0.429845
1_TAG1076	YOR134W	BAG7	1	TAG1076	0.430039	1.61182	0.424295	0.435784
1_TAG1077	YDL240W	LRG1	1	TAG1077	0.412131	1.68186	0.404474	0.419788
1_TAG1078	YDR389W	SAC7	1	TAG1078	0.406772	1.70402	0.404095	0.409449
1_TAG1079	YDR403W	DIT1	1	TAG1079	0.417237	1.66128	0.417161	0.417312
1_TAG1080	YDR402C	DIT2	1	TAG1080	0.414498	1.67226	0.418261	0.410736
1_TAG1081	YLR307W	CDA1	1	TAG1081	0.42207	1.64226	0.430263	0.413876
1_TAG1082	YLR308W	CDA2	1	TAG1082	0.416641	1.66366	0.422484	0.410798
1_TAG1084	YHR185C	PFS1	1	TAG1084	0.406174	1.70653	0.402973	0.409374
1_TAG1085	YDR104C	SPO71	1	TAG1085	0.440634	1.57307	0.447052	0.434216
1_TAG1086	YHR139C	SPS100	1	TAG1086	0.400606	1.73025	0.404239	0.396973
1_TAG1088	YBR045C	GIP1	1	TAG1088	0.386239	1.79461	0.370156	0.402321
1_TAG1089	YOR298W	MUM3	1	TAG1089	0.43468	1.59461	0.439883	0.429477
1_TAG1090	YDR260C	SWM1	1	TAG1090	0.409174	1.69401	0.373066	0.445283
1_TAG1091	YNL204C	SPS18	1	TAG1091	0.448431	1.54572	0.422443	0.474419
1_TAG1092	YER132C	PMD1	1	TAG1092	0.424833	1.63157	0.42144	0.428227
1_TAG1093	YOR190W	SPR1	1	TAG1093	0.40746	1.70114	0.38304	0.43188
1_TAG1094	YMR063W	RIM9	1	TAG1094	0.397884	1.74208	0.402109	0.393659
1_TAG1095	YHR153C	SPO16	1	TAG1095	0.418785	1.65514	0.40566	0.43191
1_TAG1097	YIL099W	SGA1	1	TAG1097	0.439905	1.57567	0.445739	0.434071
1_TAG1099	YNL098C	RAS2	1	TAG1099	0.410703	1.68771	0.410369	0.411037
1_TAG1100	YGR225W	AMA1	1	TAG1100	0.398409	1.73979	0.412059	0.384758
1_TAG1101	YDR522C	SPS2	1	TAG1101	0.41638	1.6647	0.406981	0.42578
1_TAG1102	YNL294C	RIM21	1	TAG1102	0.333699	2.07716	0.346983	0.320416
1_TAG1103	YOR313C	SPS4	1	TAG1103	0.40962	1.69217	0.414178	0.405062
1_TAG1104	YBL058W	SHP1	1	TAG1104	0.336402	2.06047	0.376746	0.296057
1_TAG1105	YAL009W	SPO7	1	TAG1105	0.352787	1.96477	0.350814	0.35476
1_TAG1106	YLR341W	SPO77	1	TAG1106	0.40723	1.7021	0.426335	0.388125
1_TAG1107	YHR004C	NEM1	1	TAG1107	0.422222	1.64167	0.406015	0.438429
1_TAG1108	YER177W	BMH1	1	TAG1108	0.427441	1.62162	0.427742	0.427141
1_TAG1109	YDR099W	BMH2	1	TAG1109	0.428398	1.618	0.420403	0.436393
1_TAG1110	YIR026C	YVH1	1	TAG1110	0.411158	1.68584	0.426051	0.396264
1_TAG1111	YGL181W	GTS1	1	TAG1111	0.409221	1.69382	0.426451	0.391991
1_TAGbre1	BRE1_Plate1	BRE1	1	TAGbre1	0.383569	1.8071	0.405553	0.361585
1_TAGDOT1OE	DOT1OE_Plate1	DOT1OE	1	TAGDOT1OE	0.4561	1.51973	0.472266	0.439934
1_TAGH3K18R	H3K18R_Plate1	H3K18R	1	TAGH3K18R	0.260235	2.66354		0.260235
1_TAGH4d	H4del_Plate1	H4del	1	TAGH4d	0.192665	3.59769		0.192665
2_TAG0001	YOL043C	NTG2	2	TAG0001	0.433052	1.60061	0.439128	0.426976
2_TAG0003	YJL218W	YJL218W	2	TAG0003	0.420541	1.64823	0.416684	0.424397
2_TAG0004	YEL052W	AFG1	2	TAG0004	0.443377	1.56334	0.439719	0.447034
2_TAG0005	YPL074W	YTA6	2	TAG0005	0.417771	1.65916	0.412156	0.423385
2_TAG0006	YDR061W	YDR061W	2	TAG0006	0.420101	1.64995	0.420101
2_TAG0008	YJL084C	ALY2	2	TAG0008	0.422991	1.63868	0.43152	0.414461
2_TAG0009	YGR163W	GTR2	2	TAG0009	0.390553	1.77478	0.38241	0.398696
2_TAG0010	YLR289W	GUF1	2	TAG0010	0.416411	1.66457	0.418986	0.413836
2_TAG0011	YDR291W	HRQ1	2	TAG0011	0.436997	1.58616	0.446383	0.427611
2_TAG0012	YFR038W	IRC5	2	TAG0012	0.406859	1.70365	0.398825	0.414893
2_TAG0013	YLR419W	YLR419W	2	TAG0013	0.434455	1.59544	0.435942	0.432967
2_TAG0014	YLR118C	YLR118C	2	TAG0014	0.435606	1.59122	0.444444	0.426768
2_TAG0015	YJR107W	YJR107W	2	TAG0015	0.424902	1.63131	0.425605	0.4242
2_TAG0016	YFL061W	DDI2	2	TAG0016	0.431563	1.60613	0.422448	0.440678
2_TAG0017	YPL189W	GUP2	2	TAG0017	0.422464	1.64072	0.426124	0.418805
2_TAG0018	YJR138W	IML1	2	TAG0018	0.380767	1.8204	0.411098	0.350436
2_TAG0019	YPL024W	RMI1	2	TAG0019	0.370474	1.87097	0.367453	0.373495
2_TAG0020	YDR383C	NKP1	2	TAG0020	0.427046	1.62312	0.425344	0.428748
2_TAG0021	YLR315W	NKP2	2	TAG0021	0.383803	1.806	0.362722	0.404883
2_TAG0022	YBR233W	PBP2	2	TAG0022	0.434165	1.5965	0.456716	0.411615
2_TAG0023	YFR023W	PES4	2	TAG0023	0.427267	1.62228	0.430358	0.424177
2_TAG0024	YOR104W	PIN2	2	TAG0024	0.405294	1.71023	0.406276	0.404313
2_TAG0025	YDR505C	PSP1	2	TAG0025	0.430068	1.61171	0.440149	0.419987
2_TAG0027	YDL001W	RMD1	2	TAG0027	0.434331	1.5959	0.441894	0.426769
2_TAG0028	YHL023C	NPR3	2	TAG0028	0.389234	1.7808	0.394834	0.383635
2_TAG0029	YEL072W	RMD6	2	TAG0029	0.423518	1.63664	0.430962	0.416075
2_TAG0030	YFR048W	RMD8	2	TAG0030	0.412225	1.68148	0.402462	0.421988
2_TAG0031	YMR266W	RSN1	2	TAG0031	0.428581	1.61731	0.469105	0.388058
2_TAG0032	YGL056C	SDS23	2	TAG0032	0.427129	1.6228	0.424093	0.430166
2_TAG0033	YBL031W	SHE1	2	TAG0033	0.424639	1.63232	0.415263	0.434015
2_TAG0034	YGL228W	SHE10	2	TAG0034	0.396085	1.75	0.401584	0.390585
2_TAG0035	YLR187W	SKG3	2	TAG0035	0.428301	1.61837	0.435397	0.421204
2_TAG0036	YIL011W	TIR3	2	TAG0036	0.418458	1.65643	0.419211	0.417706
2_TAG0037	YEL038W	UTR4	2	TAG0037	0.40392	1.71605	0.410113	0.397728
2_TAG0038	YNL212W	VID27	2	TAG0038	0.41805	1.65805	0.412771	0.423329
2_TAG0039	YPL239W	YAR1	2	TAG0039	#NUM!	#NUM!
2_TAG0041	YBR094W	PBY1	2	TAG0041	0.435963	1.58992	0.429722	0.442203
2_TAG0042	YBR108W	AIM3	2	TAG0042	0.431722	1.60554	0.433022	0.430422
2_TAG0045	YBR284W	YBR284W	2	TAG0045	0.430464	1.61023	0.422696	0.438233
2_TAG0046	YDL114W	YDL114W	2	TAG0046	0.413317	1.67703	0.399865	0.426769
2_TAG0047	YDR249C	YDR249C	2	TAG0047	0.4301	1.6116	0.42617	0.43403
2_TAG0049	YEL041W	YEF1	2	TAG0049	0.414699	1.67144	0.412338	0.417061
2_TAG0050	YER066W	RRT13	2	TAG0050	0.424596	1.63249	0.422381	0.426812
2_TAG0051	YGL242C	YGL242C	2	TAG0051	0.420936	1.64668	0.412704	0.429169
2_TAG0052	YGR126W	YGR126W	2	TAG0052	0.430429	1.61036	0.425191	0.435668
2_TAG0054	YJL149W	DAS1	2	TAG0054	0.441245	1.57089	0.441245
2_TAG0055	YJR142W	YJR142W	2	TAG0055	0.421677	1.64379	0.426201	0.417154
2_TAG0056	YKL056C	TMA19	2	TAG0056	0.347238	1.99617	0.346759	0.347716
2_TAG0057	YKL151C	YKL151C	2	TAG0057	0.393869	1.75984	0.387567	0.400172
2_TAG0058	YLL007C	LMO1	2	TAG0058	0.408822	1.69547	0.421925	0.395719
2_TAG0059	YLL049W	LDB18	2	TAG0059	0.411883	1.68287	0.432947	0.390818
2_TAG0060	YLR179C	YLR179C	2	TAG0060	0.431857	1.60504	0.435132	0.428581
2_TAG0061	YLR218C	COA4	2	TAG0061	0.428812	1.61644	0.449992	0.407632
2_TAG0062	YLR254C	NDL1	2	TAG0062	0.438385	1.58114	0.437734	0.439036
2_TAG0063	YLR352W	YLR352W	2	TAG0063	0.415995	1.66624	0.408212	0.423777
2_TAG0064	YMR262W	YMR262W	2	TAG0064	0.428276	1.61846	0.42604	0.430511
2_TAG0065	YOL111C	MDY2	2	TAG0065	0.417082	1.6619	0.42899	0.405173
2_TAG0066	YOL161C	PAU20	2	TAG0066	0.429241	1.61482	0.429773	0.428708
2_TAG0067	YOR296W	YOR296W	2	TAG0067	0.438579	1.58044	0.428845	0.448314
2_TAG0068	YOR322C	LDB19	2	TAG0068	0.405728	1.7084	0.396517	0.414939
2_TAG0069	YOR378W	AMF1	2	TAG0069	0.418515	1.6562	0.415945	0.421086
2_TAG0070	YPL066W	RGL1	2	TAG0070	0.392292	1.76692	0.387218	0.397366
2_TAG0071	YPL144W	POC4	2	TAG0071	0.380904	1.81974	0.379831	0.381977
2_TAG0075	YPR106W	ISR1	2	TAG0075	0.420601	1.64799	0.421147	0.420056
2_TAG0077	YBR125C	PTC4	2	TAG0077	0.410364	1.6891	0.413662	0.407065
2_TAG0078	YGR203W	YCH1	2	TAG0078	0.447436	1.54915	0.447772	0.447101
2_TAG0080	YJR129C	EFM3	2	TAG0080	0.429844	1.61255	0.441831	0.417857
2_TAG0081	YPL017C	IRC15	2	TAG0081	0.418227	1.65735	0.425428	0.411025
2_TAG0082	YDR501W	PLM2	2	TAG0082	0.435133	1.59295	0.433384	0.436883
2_TAG0083	YLR183C	TOS4	2	TAG0083	0.440106	1.57496	0.437111	0.443101
2_TAG0084	YGL096W	TOS8	2	TAG0084	0.40854	1.69664	0.417313	0.399768
2_TAG0085	YNR048W	YNR048W	2	TAG0085	0.436315	1.58864	0.428477	0.444154
2_TAG0086	YJL197W	UBP12	2	TAG0086	0.405137	1.71089	0.418737	0.391537
2_TAG0087	YBL067C	UBP13	2	TAG0087	0.413372	1.67681	0.417574	0.409169
2_TAG0088	YAL020C	ATS1	2	TAG0088	0.391608	1.77	0.384166	0.39905
2_TAG0089	YKR048C	NAP1	2	TAG0089	0.430082	1.61166	0.425323	0.434841
2_TAG0090	YKL110C	KTI12	2	TAG0090	0.365709	1.89535	0.375142	0.356276
2_TAG0092	YNL289W	PCL1	2	TAG0092	0.432701	1.60191	0.433437	0.431966
2_TAG0093	YDL127W	PCL2	2	TAG0093	0.426988	1.62334	0.4225	0.431475
2_TAG0094	YHR071W	PCL5	2	TAG0094	0.41038	1.68904	0.413129	0.407632
2_TAG0095	YDL179W	PCL9	2	TAG0095	0.415971	1.66633	0.418955	0.412988
2_TAG0097	YMR052W	FAR3	2	TAG0097	0.423123	1.63817	0.427488	0.418759
2_TAG0098	YPR075C	OPY2	2	TAG0098	0.421766	1.64344	0.407246	0.436286
2_TAG0099	YKL160W	ELF1	2	TAG0099	0.41449	1.67229	0.416522	0.412458
2_TAG0100	YPL089C	RLM1	2	TAG0100	0.441363	1.57047	0.430204	0.452522
2_TAG0102	YKL129C	MYO3	2	TAG0102	0.41019	1.68982	0.404812	0.415569
2_TAG0104	YPR030W	CSR2	2	TAG0104	0.437626	1.58388	0.436053	0.439199
2_TAG0105	YMR234W	RNH1	2	TAG0105	0.418286	1.65711	0.411864	0.424708
2_TAG0106	YJL042W	MHP1	2	TAG0106	0.426811	1.62401	0.414317	0.439305
2_TAG0107	YOR191W	ULS1	2	TAG0107	0.404999	1.71148	0.407202	0.402795
2_TAG0108	YMR284W	YKU70	2	TAG0108	0.428091	1.61916	0.44264	0.413542
2_TAG0109	YMR106C	YKU80	2	TAG0109	0.426292	1.62599	0.410096	0.442487
2_TAG0111	YNL097C	PHO23	2	TAG0111	0.390705	1.77409	0.402175	0.379235
2_TAG0112	YBR245C	ISW1	2	TAG0112	0.420767	1.64734	0.413365	0.428169
2_TAG0113	YGR056W	RSC1	2	TAG0113	0.367931	1.88391	0.355293	0.380569
2_TAG0114	YFR013W	IOC3	2	TAG0114	0.422902	1.63903	0.418551	0.427253
2_TAG0116	YGL163C	RAD54	2	TAG0116	0.376461	1.84122	0.366026	0.386895
2_TAG0118	YOL017W	ESC8	2	TAG0118	0.434895	1.59383	0.432127	0.437663
2_TAG0119	YDR181C	SAS4	2	TAG0119	0.433064	1.60057	0.440385	0.425742
2_TAG0120	YOR213C	SAS5	2	TAG0120	0.439935	1.57557	0.431682	0.448188
2_TAG0121	YJL065C	DLS1	2	TAG0121	0.413017	1.67825	0.405108	0.420925
2_TAG0122	YMR219W	ESC1	2	TAG0122	0.428397	1.618	0.4253	0.431494
2_TAG0123	YLR015W	BRE2	2	TAG0123	0.427626	1.62092	0.430046	0.425206
2_TAG0124	YDR469W	SDC1	2	TAG0124	0.419748	1.65134	0.421443	0.418052
2_TAG0125	YBR175W	SWD3	2	TAG0125	0.391947	1.76847	0.394921	0.388974
2_TAG0126	YLR288C	MEC3	2	TAG0126	0.420261	1.64932	0.414254	0.426269
2_TAG0127	YBR278W	DPB3	2	TAG0127	0.39616	1.74967	0.39402	0.3983
2_TAG0128	YDR121W	DPB4	2	TAG0128	0.447632	1.54848	0.432038	0.463225
2_TAG0129	YPL001W	HAT1	2	TAG0129	0.403698	1.71699	0.415266	0.392131
2_TAG0131	YHR119W	SET1	2	TAG0131	0.415417	1.66856	0.413725	0.41711
2_TAG0132	YCL061C	MRC1	2	TAG0132	0.378083	1.83332	0.382555	0.373611
2_TAG0133	YGL037C	PNC1	2	TAG0133	0.428694	1.61688	0.41734	0.440047
2_TAG0134	YOR209C	NPT1	2	TAG0134	0.414535	1.67211	0.405402	0.423667
2_TAG0135	YDR440W	DOT1	2	TAG0135	0.445675	1.55527	0.448705	0.442646
2_TAG0136	YPL138C	SPP1	2	TAG0136	0.423816	1.63549	0.425851	0.421781
2_TAG0137	YAL019W	FUN30	2	TAG0137	0.394999	1.75481	0.389306	0.400693
2_TAG0138	YDR254W	CHL4	2	TAG0138	0.427293	1.62218	0.418408	0.436178
2_TAG0140	YBR107C	IML3	2	TAG0140	0.419838	1.65099	0.418608	0.421068
2_TAG0141	YGR089W	NNF2	2	TAG0141	0.404411	1.71397	0.414314	0.394509
2_TAG0142	YLR381W	CTF3	2	TAG0142	0.416679	1.6635	0.427774	0.405584
2_TAG0143	YPR046W	MCM16	2	TAG0143	0.428189	1.61879	0.425457	0.430921
2_TAG0144	YDR318W	MCM21	2	TAG0144	0.403258	1.71887	0.392704	0.413812
2_TAG0146	YAR018C	KIN3	2	TAG0146	0.393777	1.76025	0.389549	0.398005
2_TAG0147	YPL008W	CHL1	2	TAG0147	0.386966	1.79123	0.383748	0.390185
2_TAG0148	YCR077C	PAT1	2	TAG0148	0.365105	1.89849	0.371323	0.358886
2_TAG0149	YPL018W	CTF19	2	TAG0149	0.405269	1.71034	0.400722	0.409815
2_TAG0151	YJR053W	BFA1	2	TAG0151	0.443439	1.56312	0.442687	0.444191
2_TAG0152	YDR435C	PPM1	2	TAG0152	0.441845	1.56876	0.437281	0.446409
2_TAG0153	YNL327W	EGT2	2	TAG0153	0.406296	1.70601	0.402288	0.410304
2_TAG0156	YBR023C	CHS3	2	TAG0156	0.426691	1.62447	0.422629	0.430753
2_TAG0157	YBL061C	SKT5	2	TAG0157	0.418112	1.6578	0.422687	0.413537
2_TAG0158	YNL166C	BNI5	2	TAG0158	0.429355	1.61439	0.43351	0.425199
2_TAG0165	YJL115W	ASF1	2	TAG0165	0.298378	2.32305	0.285941	0.310815
2_TAG0166	YER142C	MAG1	2	TAG0166	0.453583	1.52816	0.461707	0.44546
2_TAG0167	YLR427W	MAG2	2	TAG0167	0.428262	1.61851	0.434415	0.42211
2_TAG0168	YDL200C	MGT1	2	TAG0168	0.427876	1.61997	0.425023	0.430729
2_TAG0169	YGR081C	SLX9	2	TAG0169	0.345318	2.00727	0.323771	0.366865
2_TAG0170	YER116C	SLX8	2	TAG0170	0.253341	2.73602		0.253341
2_TAG0172	YOL090W	MSH2	2	TAG0172	0.415271	1.66914	0.417723	0.41282
2_TAG0173	YCR092C	MSH3	2	TAG0173	0.426107	1.6267	0.438494	0.413719
2_TAG0174	YML061C	PIF1	2	TAG0174	0.414371	1.67277	0.387568	0.441174
2_TAG0175	YJL208C	NUC1	2	TAG0175	0.418256	1.65723	0.432137	0.404375
2_TAG0176	YDR110W	FOB1	2	TAG0176	0.407374	1.7015	0.419392	0.395355
2_TAG0177	YHR120W	MSH1	2	TAG0177	0.435477	1.5917	0.422591	0.448362
2_TAG0178	YLR032W	RAD5	2	TAG0178	0.374473	1.85099	0.369365	0.379582
2_TAG0179	YMR173W	DDR48	2	TAG0179	0.408818	1.69549	0.420442	0.397194
2_TAG0180	YJR069C	HAM1	2	TAG0180	0.422519	1.64051	0.424514	0.420523
2_TAG0182	YDR030C	RAD28	2	TAG0182	0.444613	1.55899	0.452246	0.43698
2_TAG0183	YDR263C	DIN7	2	TAG0183	0.423902	1.63516	0.412426	0.435379
2_TAG0184	YBL019W	APN2	2	TAG0184	0.418907	1.65466	0.42292	0.414893
2_TAG0185	YMR156C	TPP1	2	TAG0185	0.421507	1.64445	0.412423	0.430592
2_TAG0186	YIR002C	MPH1	2	TAG0186	0.42439	1.63328	0.425422	0.423358
2_TAG0187	YBR223C	TDP1	2	TAG0187	0.441689	1.56931	0.447974	0.435404
2_TAG0191	YBR228W	SLX1	2	TAG0191	0.396429	1.74848	0.402427	0.390432
2_TAG0192	YMR137C	PSO2	2	TAG0192	0.429294	1.61462	0.430929	0.427658
2_TAG0193	YPR135W	CTF4	2	TAG0193	0.312673	2.21684	0.317454	0.307893
2_TAG0194	YJR144W	MGM101	2	TAG0194	0.376012	1.84342	0.36027	0.391754
2_TAG0195	YJL092W	SRS2	2	TAG0195	0.394579	1.75668	0.399965	0.389193
2_TAG0196	YKL114C	APN1	2	TAG0196	0.403089	1.71959	0.398648	0.407531
2_TAG0197	YAL015C	NTG1	2	TAG0197	0.424744	1.63192	0.431138	0.418349
2_TAG0198	YOR346W	REV1	2	TAG0198	0.413117	1.67785	0.40529	0.420944
2_TAG0199	YDR386W	MUS81	2	TAG0199	0.398685	1.73858	0.402355	0.395015
2_TAG0200	YDR419W	RAD30	2	TAG0200	0.425897	1.6275	0.430901	0.420893
2_TAG0201	YHR081W	LRP1	2	TAG0201	0.415515	1.66817	0.408414	0.422615
2_TAG0202	YPR164W	MMS1	2	TAG0202	0.356973	1.94174	0.351806	0.362139
2_TAG0203	YLR265C	NEJ1	2	TAG0203	0.410213	1.68973	0.402433	0.417993
2_TAG0205	YGL127C	SOH1	2	TAG0205	0.412645	1.67976	0.406756	0.418535
2_TAG0206	YDR079C-A	TFB5	2	TAG0206	0.358479	1.93358	0.36514	0.351818
2_TAG0207	YKL025C	PAN3	2	TAG0207	0.429776	1.61281	0.422917	0.436634
2_TAG0209	YMR224C	MRE11	2	TAG0209	0.345234	2.00776	0.342432	0.348036
2_TAG0210	YIL153W	RRD1	2	TAG0210	0.401489	1.72644	0.403137	0.39984
2_TAG0211	YML060W	OGG1	2	TAG0211	0.366911	1.88914	0.371829	0.361992
2_TAG0212	YER169W	RPH1	2	TAG0212	0.411975	1.6825	0.410399	0.41355
2_TAG0214	YBR098W	MMS4	2	TAG0214	0.40334	1.71852	0.39622	0.410461
2_TAG0215	YML102W	CAC2	2	TAG0215	0.393659	1.76078	0.391571	0.395748
2_TAG0216	YBR195C	MSI1	2	TAG0216	0.398561	1.73912	0.414782	0.38234
2_TAG0217	YPL167C	REV3	2	TAG0217	0.435669	1.59099	0.440715	0.430623
2_TAG0218	YIL139C	REV7	2	TAG0218	0.405979	1.70735	0.405979
2_TAG0219	YHR031C	RRM3	2	TAG0219	0.409832	1.6913	0.414858	0.404805
2_TAG0222	YDR279W	RNH202	2	TAG0222	0.427646	1.62084	0.416021	0.439272
2_TAG0223	YLR154C	RNH203	2	TAG0223	0.413332	1.67698	0.404321	0.422342
2_TAG0224	YER070W	RNR1	2	TAG0224	0.288792	2.40016	0.283635	0.293949
2_TAG0225	YIL066C	RNR3	2	TAG0225	0.435645	1.59108	0.431877	0.439413
2_TAG0226	YGR180C	RNR4	2	TAG0226	0.433008	1.60077	0.432773	0.433244
2_TAG0227	YNL273W	TOF1	2	TAG0227	0.419889	1.65079	0.416081	0.423697
2_TAG0228	YGR276C	RNH70	2	TAG0228	0.418866	1.65482	0.419368	0.418363
2_TAG0229	YLR135W	SLX4	2	TAG0229	0.411339	1.6851	0.409862	0.412815
2_TAG0230	YNL218W	MGS1	2	TAG0230	0.444734	1.55856	0.452806	0.436663
2_TAG0231	YCR086W	CSM1	2	TAG0231	0.314362	2.20493		0.314362
2_TAG0232	YOR144C	ELG1	2	TAG0232	0.397002	1.74596	0.3877	0.406303
2_TAG0233	YKR010C	TOF2	2	TAG0233	0.423618	1.63626	0.416178	0.431057
2_TAG0236	YLR320W	MMS22	2	TAG0236	0.308041	2.25018	0.286017	0.330065
2_TAG0237	YOR005C	DNL4	2	TAG0237	0.428053	1.6193	0.429495	0.426611
2_TAG0239	YGL090W	LIF1	2	TAG0239	0.40708	1.70273	0.420319	0.393842
2_TAG0240	YCR014C	POL4	2	TAG0240	0.432642	1.60213	0.443892	0.421392
2_TAG0243	YNL250W	RAD50	2	TAG0243	0.356437	1.94466	0.338811	0.374063
2_TAG0244	YDR369C	XRS2	2	TAG0244	0.410839	1.68715	0.376152	0.445525
2_TAG0245	YBR214W	SDS24	2	TAG0245	0.419306	1.65308	0.418561	0.420051
2_TAG0246	YIL135C	VHS2	2	TAG0246	0.442288	1.56718	0.431041	0.453535
2_TAG0247	YFR040W	SAP155	2	TAG0247	0.40579	1.70814	0.38851	0.423071
2_TAG0248	YJL098W	SAP185	2	TAG0248	0.439174	1.5783	0.433975	0.444372
2_TAG0249	YKR028W	SAP190	2	TAG0249	0.419644	1.65175	0.402718	0.43657
2_TAG0250	YGL229C	SAP4	2	TAG0250	0.428875	1.6162	0.413471	0.444278
2_TAG0252	YPR120C	CLB5	2	TAG0252	0.374586	1.85044	0.381887	0.367285
2_TAG0253	YGR109C	CLB6	2	TAG0253	0.436643	1.58745	0.428989	0.444297
2_TAG0254	YAL040C	CLN3	2	TAG0254	0.429456	1.61401	0.427508	0.431404
2_TAG0255	YER167W	BCK2	2	TAG0255	0.459668	1.50793	0.449363	0.469973
2_TAG0256	YKR072C	SIS2	2	TAG0256	0.43601	1.58975	0.418254	0.453765
2_TAG0257	YOR054C	VHS3	2	TAG0257	0.452329	1.5324	0.440524	0.464133
2_TAG0258	YLR079W	SIC1	2	TAG0258	0.274328	2.52671	0.272337	0.276318
2_TAG0259	YJR059W	PTK2	2	TAG0259	0.435861	1.59029	0.417252	0.45447
2_TAG0260	YCR008W	SAT4	2	TAG0260	0.450565	1.53839	0.430185	0.470945
2_TAG0261	YER089C	PTC2	2	TAG0261	0.432286	1.60345	0.424179	0.440393
2_TAG0262	YER111C	SWI4	2	TAG0262	0.416377	1.66471	0.416413	0.41634
2_TAG0265	YBR215W	HPC2	2	TAG0265	0.427932	1.61976	0.41346	0.442404
2_TAG0266	YLR131C	ACE2	2	TAG0266	0.444238	1.56031	0.458056	0.43042
2_TAG0267	YDR146C	SWI5	2	TAG0267	0.389485	1.77965	0.391349	0.38762
2_TAG0268	YGR108W	CLB1	2	TAG0268	0.436223	1.58897	0.441614	0.430832
2_TAG0269	YPR119W	CLB2	2	TAG0269	0.407981	1.69897	0.413761	0.4022
2_TAG0270	YDL155W	CLB3	2	TAG0270	0.438619	1.58029	0.435649	0.441589
2_TAG0271	YLR210W	CLB4	2	TAG0271	0.462964	1.49719	0.463822	0.462107
2_TAG0272	YBL051C	PIN4	2	TAG0272	0.408244	1.69787	0.387899	0.428589
2_TAG0273	YJL187C	SWE1	2	TAG0273	0.398179	1.74079	0.400926	0.395432
2_TAG0274	YMR036C	MIH1	2	TAG0274	0.452736	1.53102	0.459664	0.445808
2_TAG0276	YPR193C	HPA2	2	TAG0276	0.438234	1.58168	0.435158	0.44131
2_TAG0277	YEL066W	HPA3	2	TAG0277	0.437375	1.58479	0.422357	0.452392
2_TAG0278	YGR252W	GCN5	2	TAG0278	0.338948	2.045	0.349321	0.328574
2_TAG0279	YOR064C	YNG1	2	TAG0279	0.427092	1.62295	0.409971	0.444213
2_TAG0280	YIL112W	HOS4	2	TAG0280	0.417548	1.66004	0.421331	0.413764
2_TAG0281	YKR029C	SET3	2	TAG0281	0.416744	1.66325	0.423295	0.410193
2_TAG0283	YBR258C	SHG1	2	TAG0283	0.428407	1.61796	0.432092	0.424723
2_TAG0284	YKL017C	HCS1	2	TAG0284	0.392001	1.76823	0.387216	0.396787
2_TAG0285	YGR230W	BNS1	2	TAG0285	0.406425	1.70548	0.405632	0.407217
2_TAG0287	YDL115C	IWR1	2	TAG0287	0.423859	1.63533	0.425215	0.422502
2_TAG0288	YPL130W	SPO19	2	TAG0288	0.455566	1.52151	0.454959	0.456173
2_TAG0289	YIL073C	SPO22	2	TAG0289	0.44021	1.57458	0.470081	0.41034
2_TAG0290	YNL012W	SPO1	2	TAG0290	0.428115	1.61907	0.41703	0.439201
2_TAG0291	YBL009W	ALK2	2	TAG0291	0.442913	1.56497	0.43497	0.450855
2_TAG0292	YJR094C	IME1	2	TAG0292	0.417761	1.6592	0.40642	0.429102
2_TAG0293	YGR247W	CPD1	2	TAG0293	0.420874	1.64692	0.413362	0.428386
2_TAG0294	YPR007C	REC8	2	TAG0294	0.426967	1.62342	0.422511	0.431423
2_TAG0295	YDR285W	ZIP1	2	TAG0295	0.324161	2.13828		0.324161
2_TAG0296	YIL072W	HOP1	2	TAG0296	0.404768	1.71245	0.397722	0.411815
2_TAG0297	YNL082W	PMS1	2	TAG0297	0.427954	1.61968	0.42782	0.428089
2_TAG0298	YGL251C	HFM1	2	TAG0298	0.358605	1.9329	0.390185	0.327026
2_TAG0299	YNL025C	SSN8	2	TAG0299	0.389051	1.78164	0.39932	0.378781
2_TAG0300	YMR198W	CIK1	2	TAG0300	0.335682	2.06489	0.338847	0.332518
2_TAG0301	YPR141C	KAR3	2	TAG0301	0.339796	2.03989	0.34735	0.332243
2_TAG0302	YFR046C	CNN1	2	TAG0302	0.441484	1.57004	0.437324	0.445643
2_TAG0303	YPL194W	DDC1	2	TAG0303	0.409148	1.69412	0.4088	0.409496
2_TAG0304	YDR273W	DON1	2	TAG0304	0.410661	1.68788	0.404527	0.416795
2_TAG0305	YPL055C	LGE1	2	TAG0305	0.40294	1.72023	0.411901	0.393978
2_TAG0306	YGL045W	RIM8	2	TAG0306	0.398454	1.73959	0.407732	0.389175
2_TAG0307	YOR195W	SLK19	2	TAG0307	0.43805	1.58235	0.431643	0.444457
2_TAG0308	YPL033C	SRL4	2	TAG0308	0.424873	1.63142	0.417627	0.432119
2_TAG0309	YPR078C	YPR078C	2	TAG0309	0.417351	1.66083	0.434755	0.399946
2_TAG0310	YGL192W	IME4	2	TAG0310	0.441071	1.57151	0.443089	0.439053
2_TAG0311	YLR182W	SWI6	2	TAG0311	0.379748	1.82528	0.380682	0.378814
2_TAG0312	YJR066W	TOR1	2	TAG0312	0.436851	1.58669	0.443267	0.430436
2_TAG0313	YOR178C	GAC1	2	TAG0313	0.205896	3.36649	0.205896
2_TAG0315	YHL024W	RIM4	2	TAG0315	0.429087	1.6154	0.43987	0.418304
2_TAG0316	YNL210W	MER1	2	TAG0316	0.435962	1.58993	0.433196	0.438728
2_TAG0317	YER179W	DMC1	2	TAG0317	0.427328	1.62205	0.418455	0.4362
2_TAG0318	YGR044C	RME1	2	TAG0318	0.414324	1.67296	0.410601	0.418047
2_TAG0319	YOL091W	SPO21	2	TAG0319	0.427225	1.62244	0.433828	0.420621
2_TAG0321	YCL055W	KAR4	2	TAG0321	0.437075	1.58588	0.428247	0.445904
2_TAG0322	YIL132C	CSM2	2	TAG0322	0.428416	1.61793	0.421579	0.435252
2_TAG0324	YER106W	MAM1	2	TAG0324	0.436435	1.5882	0.435006	0.437865
2_TAG0325	YMR048W	CSM3	2	TAG0325	0.421092	1.64607	0.43578	0.406404
2_TAG0326	YHL022C	SPO11	2	TAG0326	0.422777	1.63951	0.431143	0.41441
2_TAG0327	YGL175C	SAE2	2	TAG0327	0.431661	1.60577	0.426419	0.436902
2_TAG0328	YDR076W	RAD55	2	TAG0328	0.375359	1.84663	0.374994	0.375723
2_TAG0329	YFL003C	MSH4	2	TAG0329	0.424047	1.6346	0.415511	0.432583
2_TAG0331	YML128C	MSC1	2	TAG0331	0.421765	1.64344	0.423213	0.420317
2_TAG0332	YLR219W	MSC3	2	TAG0332	0.429562	1.61361	0.424046	0.435079
2_TAG0334	YHR039C	MSC7	2	TAG0334	0.410245	1.6896	0.411219	0.40927
2_TAG0336	YJR021C	REC107	2	TAG0336	0.407064	1.7028	0.40086	0.413267
2_TAG0338	YER173W	RAD24	2	TAG0338	0.433759	1.598	0.429143	0.438375
2_TAG0340	YBR073W	RDH54	2	TAG0340	0.40846	1.69698	0.419056	0.397864
2_TAG0341	YOR368W	RAD17	2	TAG0341	0.412713	1.67949	0.394048	0.431378
2_TAG0342	YPL121C	MEI5	2	TAG0342	0.418967	1.65442	0.428695	0.409238
2_TAG0343	YPL164C	MLH3	2	TAG0343	0.404907	1.71187	0.40492	0.404893
2_TAG0344	YIR025W	MND2	2	TAG0344	0.428383	1.61805	0.418781	0.437986
2_TAG0346	YMR133W	REC114	2	TAG0346	0.421285	1.64532	0.422409	0.420162
2_TAG0347	YHR079C-A	SAE3	2	TAG0347	0.423791	1.63559	0.430513	0.417069
2_TAG0349	YLR329W	REC102	2	TAG0349	0.417046	1.66204	0.412199	0.421894
2_TAG0350	YHL029C	OCA5	2	TAG0350	0.399881	1.73339	0.387249	0.412513
2_TAG0351	YJR108W	ABM1	2	TAG0351	0.402556	1.72186	0.400459	0.404653
2_TAG0352	YIL123W	SIM1	2	TAG0352	0.44494	1.55784	0.435229	0.454652
2_TAG0353	YOR265W	RBL2	2	TAG0353	0.439096	1.57858	0.434828	0.443365
2_TAG0355	YER016W	BIM1	2	TAG0355	0.381165	1.8185	0.378135	0.384195
2_TAG0357	YMR138W	CIN4	2	TAG0357	0.438216	1.58175	0.436786	0.439646
2_TAG0358	YPL253C	VIK1	2	TAG0358	0.41522	1.66935	0.401947	0.428492
2_TAG0359	YPL241C	CIN2	2	TAG0359	0.41473	1.67132	0.4264	0.403061
2_TAG0360	YDR424C	DYN2	2	TAG0360	0.436174	1.58915	0.436318	0.436029
2_TAG0361	YOR033C	EXO1	2	TAG0361	0.373939	1.85364	0.368182	0.379697
2_TAG0362	YDR097C	MSH6	2	TAG0362	0.434911	1.59377	0.436295	0.433527
2_TAG0363	YBR272C	HSM3	2	TAG0363	0.439939	1.57555	0.440401	0.439477
2_TAG0364	YGR144W	THI4	2	TAG0364	0.402051	1.72403		0.402051
2_TAG0365	YLR190W	MMR1	2	TAG0365	0.300819	2.3042	0.302471	0.299167
2_TAG0366	YMR072W	ABF2	2	TAG0366	0.351711	1.97079	0.351112	0.35231
2_TAG0367	YNL213C	RRG9	2	TAG0367	0.458831	1.51068	0.449648	0.468013
2_TAG0368	YML058W	SML1	2	TAG0368	0.424628	1.63236	0.422376	0.42688
2_TAG0371	YGL021W	ALK1	2	TAG0371	0.431693	1.60565	0.420768	0.442619
2_TAG0374	YMR294W	JNM1	2	TAG0374	0.384216	1.80406	0.390867	0.377565
2_TAG0375	YMR078C	CTF18	2	TAG0375	0.339831	2.03968	0.35611	0.323552
2_TAG0376	YHR191C	CTF8	2	TAG0376	0.344068	2.01457	0.342704	0.345431
2_TAG0377	YCL016C	DCC1	2	TAG0377	0.399344	1.73571	0.419384	0.379304
2_TAG0378	YOL115W	PAP2	2	TAG0378	0.265447	2.61125	0.288177	0.242716
2_TAG0379	YML034W	SRC1	2	TAG0379	0.385844	1.79644	0.392458	0.379231
2_TAG0380	YMR190C	SGS1	2	TAG0380	0.395494	1.75261	0.396892	0.394096
2_TAG0381	YLR226W	BUR2	2	TAG0381	0.288875	2.39947		0.288875
2_TAG0382	YEL061C	CIN8	2	TAG0382	0.367251	1.8874	0.372453	0.362048
2_TAG0383	YOR073W	SGO1	2	TAG0383	0.334749	2.07065	0.324684	0.344814
2_TAG0385	YAL047C	SPC72	2	TAG0385	0.333649	2.07747	0.335868	0.33143
2_TAG0386	YML124C	TUB3	2	TAG0386	0.442378	1.56687	0.450811	0.433944
2_TAG0387	YMR055C	BUB2	2	TAG0387	0.431083	1.60792	0.434395	0.427772
2_TAG0388	YOR026W	BUB3	2	TAG0388	0.344619	2.01134	0.364931	0.324307
2_TAG0389	YDR517W	GRH1	2	TAG0389	0.448135	1.54674	0.441021	0.455248
2_TAG0390	YNL164C	IBD2	2	TAG0390	0.421209	1.64562	0.436375	0.406043
2_TAG0394	YNL116W	DMA2	2	TAG0394	0.422846	1.63924	0.436341	0.409352
2_TAG0395	YGL086W	MAD1	2	TAG0395	0.422921	1.63895	0.426947	0.418895
2_TAG0397	YCL029C	BIK1	2	TAG0397	0.389398	1.78005	0.396254	0.382542
2_TAG0398	YGL216W	KIP3	2	TAG0398	0.419214	1.65344	0.422605	0.415824
2_TAG0399	YJR091C	JSN1	2	TAG0399	0.433772	1.59795	0.442178	0.425365
2_TAG0400	YIL040W	APQ12	2	TAG0400	0.396369	1.74874	0.382526	0.410213
2_TAG0401	YDR139C	RUB1	2	TAG0401	0.450463	1.53874	0.469716	0.431209
2_TAG0402	YDR289C	RTT103	2	TAG0402	0.403766	1.7167	0.414042	0.39349
2_TAG0404	YHR154W	RTT107	2	TAG0404	0.373275	1.85693	0.373767	0.372783
2_TAG0405	YLL002W	RTT109	2	TAG0405	0.346728	1.99911	0.348351	0.345106
2_TAG0406	YBR158W	AMN1	2	TAG0406	0.43424	1.59623	0.435403	0.433076
2_TAG0407	YDR255C	RMD5	2	TAG0407	0.407529	1.70085	0.412208	0.40285
2_TAG0409	YGL197W	MDS3	2	TAG0409	0.439674	1.5765	0.447569	0.43178
2_TAG0411	YDR451C	YHP1	2	TAG0411	0.423882	1.63523	0.415043	0.432721
2_TAG0412	YML027W	YOX1	2	TAG0412	0.422956	1.63882	0.448249	0.397662
2_TAG0413	YPL269W	KAR9	2	TAG0413	0.418405	1.65664	0.419936	0.416875
2_TAG0414	YOR269W	PAC1	2	TAG0414	0.402113	1.72376	0.406423	0.397803
2_TAG0415	YMR299C	DYN3	2	TAG0415	0.400433	1.731	0.396866	0.403999
2_TAG0416	YPL155C	KIP2	2	TAG0416	0.42737	1.62189	0.43735	0.417391
2_TAG0417	YDR488C	PAC11	2	TAG0417	0.416877	1.66272	0.430949	0.402804
2_TAG0418	YDR150W	NUM1	2	TAG0418	0.405034	1.71133	0.413117	0.39695
2_TAG0419	YHR086W	NAM8	2	TAG0419	0.422208	1.64172	0.439523	0.404894
2_TAG0420	YGR129W	SYF2	2	TAG0420	0.449174	1.54316	0.463034	0.435313
2_TAG0422	YOR247W	SRL1	2	TAG0422	0.422814	1.63937	0.418046	0.427581
2_TAG0423	YLR082C	SRL2	2	TAG0423	0.402714	1.72119	0.410075	0.395353
2_TAG0424	YKR091W	SRL3	2	TAG0424	0.425575	1.62873	0.428443	0.422706
2_TAG0426	YJR035W	RAD26	2	TAG0426	0.412237	1.68143	0.417174	0.407299
2_TAG0427	YMR201C	RAD14	2	TAG0427	0.27109	2.55689	0.290325	0.251854
2_TAG0429	YJR052W	RAD7	2	TAG0429	0.385956	1.79592	0.398776	0.373135
2_TAG0431	YEL037C	RAD23	2	TAG0431	0.397352	1.74442	0.387314	0.40739
2_TAG0433	YGR170W	PSD2	2	TAG0433	0.422051	1.64233	0.420031	0.424072
2_TAG0435	YHR014W	SPO13	2	TAG0435	0.428362	1.61813	0.430767	0.425957
2_TAG0437	YOR349W	CIN1	2	TAG0437	0.421408	1.64484	0.422996	0.419819
2_TAG0439	YBR057C	MUM2	2	TAG0439	0.41873	1.65536	0.419245	0.418214
2_TAG0440	YGR161C	RTS3	2	TAG0440	0.41401	1.67423	0.41391	0.41411
2_TAG0441	YDR481C	PHO8	2	TAG0441	0.405458	1.70954	0.410564	0.400353
2_TAG0444	YER123W	YCK3	2	TAG0444	0.427322	1.62207	0.432057	0.422588
2_TAG0445	YJL141C	YAK1	2	TAG0445	0.428334	1.61824	0.430758	0.42591
2_TAG0446	YMR104C	YPK2	2	TAG0446	0.310058	2.23554	0.308566	0.31155
2_TAG0447	YGR188C	BUB1	2	TAG0447	0.378754	1.83007	0.389513	0.367995
2_TAG0448	YBR156C	SLI15	2	TAG0448	0.340175	2.03762	0.316636	0.363713
2_TAG0451	YDR507C	GIN4	2	TAG0451	0.411433	1.68472	0.419514	0.403351
2_TAG0452	YKL101W	HSL1	2	TAG0452	0.430057	1.61176	0.423669	0.436445
2_TAG0453	YJL106W	IME2	2	TAG0453	0.43298	1.60088	0.425592	0.440368
2_TAG0454	YCL024W	KCC4	2	TAG0454	0.43048	1.61017	0.426057	0.434904
2_TAG0455	YCR091W	KIN82	2	TAG0455	0.442279	1.56722	0.446239	0.438318
2_TAG0456	YER129W	SAK1	2	TAG0456	0.45042	1.53889	0.458401	0.442439
2_TAG0457	YFL033C	RIM15	2	TAG0457	0.43934	1.5777	0.442998	0.435682
2_TAG0458	YDR247W	VHS1	2	TAG0458	0.431552	1.60617	0.428691	0.434413
2_TAG0459	YIL035C	CKA1	2	TAG0459	0.447726	1.54815		0.447726
2_TAG0461	YGL019W	CKB1	2	TAG0461	0.41224	1.68142	0.437159	0.387322
2_TAG0462	YOR039W	CKB2	2	TAG0462	0.380853	1.81998	0.381549	0.380158
2_TAG0463	YGR092W	DBF2	2	TAG0463	0.361597	1.91691	0.37339	0.349804
2_TAG0464	YPR111W	DBF20	2	TAG0464	0.44647	1.55251	0.445307	0.447633
2_TAG0465	YKL048C	ELM1	2	TAG0465	0.443345	1.56345	0.473511	0.413178
2_TAG0466	YOR351C	MEK1	2	TAG0466	0.413995	1.67429	0.403353	0.424637
2_TAG0467	YIL095W	PRK1	2	TAG0467	0.430564	1.60986	0.435639	0.425488
2_TAG0468	YGL158W	RCK1	2	TAG0468	0.434944	1.59365	0.448239	0.421648
2_TAG0469	YLR248W	RCK2	2	TAG0469	0.419852	1.65093	0.415132	0.424571
2_TAG0470	YGL190C	CDC55	2	TAG0470	0.38339	1.80794		0.38339
2_TAG0471	YDL134C	PPH21	2	TAG0471	0.436704	1.58722	0.429417	0.443991
2_TAG0472	YDL188C	PPH22	2	TAG0472	0.423206	1.63785	0.409374	0.437038
2_TAG0473	YOR014W	RTS1	2	TAG0473	0.418446	1.65648	0.426614	0.410278
2_TAG0474	YGR270W	YTA7	2	TAG0474	0.413467	1.67643	0.395639	0.431294
2_TAG0475	YMR304W	UBP15	2	TAG0475	0.407809	1.69968	0.403992	0.411627
2_TAG0476	YER144C	UBP5	2	TAG0476	0.39608	1.75002	0.381494	0.410666
2_TAG0478	YOR027W	STI1	2	TAG0478	0.415645	1.66764	0.415645
2_TAG0481	YHR111W	UBA4	2	TAG0481	0.352493	1.96642	0.348167	0.356818
2_TAG0482	YLR306W	UBC12	2	TAG0482	0.408389	1.69727	0.39953	0.417248
2_TAG0483	YDR092W	UBC13	2	TAG0483	0.370085	1.87294		0.370085
2_TAG0484	YEL012W	UBC8	2	TAG0484	0.410092	1.69023	0.407335	0.412848
2_TAG0485	YGR184C	UBR1	2	TAG0485	0.433227	1.59996	0.445727	0.420726
2_TAG0486	YPR066W	UBA3	2	TAG0486	0.422667	1.63994	0.420564	0.42477
2_TAG0487	YPL003W	ULA1	2	TAG0487	0.4373	1.58506	0.426933	0.447668
2_TAG0488	YMR154C	RIM13	2	TAG0488	0.418991	1.65433	0.417486	0.420495
2_TAG0489	YHR134W	WSS1	2	TAG0489	0.397109	1.74548	0.390206	0.404012
2_TAG0490	YDR409W	SIZ1	2	TAG0490	0.441413	1.57029	0.447524	0.435302
2_TAG0491	YOR156C	NFI1	2	TAG0491	0.426913	1.62363	0.425443	0.428384
2_TAG0493	YDR144C	MKC7	2	TAG0493	0.463597	1.49515	0.447244	0.47995
2_TAG0494	YKL185W	ASH1	2	TAG0494	0.419993	1.65038	0.394607	0.44538
2_TAG0495	YIL131C	FKH1	2	TAG0495	0.43107	1.60797	0.421198	0.440943
2_TAG0496	YNL068C	FKH2	2	TAG0496	0.431335	1.60698	0.423497	0.439174
2_TAG0497	YLL017W	YLL017W_noSGDORF	2	TAG0497	0.434212	1.59633	0.430949	0.437475
2_TAG0498	YOR101W	RAS1	2	TAG0498	0.435109	1.59304	0.42515	0.445068
2_TAG0499	YOL110W	SHR5	2	TAG0499	0.435001	1.59344	0.425446	0.444557
2_TAG0500	YIL122W	POG1	2	TAG0500	0.415826	1.66692	0.408765	0.422887
2_TAG0501	YMR100W	MUB1	2	TAG0501	0.372011	1.86324	0.364857	0.379166
2_TAG0502	YDL056W	MBP1	2	TAG0502	0.451189	1.53627	0.449192	0.453187
2_TAG0504	YDR363W-A	SEM1	2	TAG0504	0.394213	1.7583	0.375513	0.412914
2_TAG0505	YBR133C	HSL7	2	TAG0505	0.437139	1.58565	0.449928	0.42435
2_TAG0506	YBL064C	PRX1	2	TAG0506	0.428386	1.61804	0.41271	0.444062
2_TAG0507	YDR453C	TSA2	2	TAG0507	0.446678	1.55178	0.43793	0.455425
2_TAG0508	YNL197C	WHI3	2	TAG0508	0.377614	1.83559	0.369922	0.385307
2_TAG0509	YDL224C	WHI4	2	TAG0509	0.411559	1.6842	0.409524	0.413594
2_TAG0510	YMR199W	CLN1	2	TAG0510	0.423872	1.63528	0.425714	0.42203
2_TAG0512	YPL256C	CLN2	2	TAG0512	0.434103	1.59673	0.435915	0.432291
2_TAG0513	YLR003C	CMS1	2	TAG0513	0.410018	1.69053	0.408081	0.411954
2_TAG0514	YAL024C	LTE1	2	TAG0514	0.418717	1.65541	0.407795	0.429639
2_TAG0515	YHR152W	SPO12	2	TAG0515	0.434254	1.59618	0.438085	0.430424
2_TAG0516	YBR186W	PCH2	2	TAG0516	0.419937	1.6506	0.416952	0.422921
2_TAG0517	YPL139C	UME1	2	TAG0517	0.389122	1.78131	0.392052	0.386192
2_TAG0518	YOR230W	WTM1	2	TAG0518	0.418558	1.65604	0.422452	0.414665
2_TAG0520	YNL078W	NIS1	2	TAG0520	0.431978	1.60459	0.447427	0.41653
2_TAG0521	YBL008W	HIR1	2	TAG0521	0.382869	1.8104	0.390532	0.375206
2_TAG0522	YOR038C	HIR2	2	TAG0522	0.403746	1.71679	0.39591	0.411582
2_TAG0523	YOL012C	HTZ1	2	TAG0523	0.406311	1.70595	0.405226	0.407396
2_TAG0524	YOL006C	TOP1	2	TAG0524	0.369303	1.87691	0.362233	0.376373
2_TAG0525	YPR023C	EAF3	2	TAG0525	0.427332	1.62203	0.417408	0.437256
2_TAG0526	YCR094W	CDC50	2	TAG0526	0.363677	1.90594	0.363764	0.36359
2_TAG0527	YOR113W	AZF1	2	TAG0527	0.442938	1.56488	0.45033	0.435547
2_TAG0528	YNL021W	HDA1	2	TAG0528	0.430486	1.61015	0.427249	0.433724
2_TAG0529	YPR068C	HOS1	2	TAG0529	0.419675	1.65163	0.414895	0.424456
2_TAG0530	YJL168C	SET2	2	TAG0530	0.419234	1.65336	0.418339	0.42013
2_TAG0531	YGL194C	HOS2	2	TAG0531	0.415773	1.66713	0.422618	0.408928
2_TAG0533	YPL022W	RAD1	2	TAG0533	0.411468	1.68457	0.405021	0.417915
2_TAG0534	YML095C	RAD10	2	TAG0534	0.46129	1.50263	0.446541	0.476039
2_TAG0535	YML058W-A	HUG1	2	TAG0535	0.432587	1.60233	0.436644	0.428529
2_TAG0536	YBL088C	TEL1	2	TAG0536	0.419673	1.65164	0.436604	0.402742
2_TAG0537	YER062C	GPP2	2	TAG0537	0.43119	1.60752	0.420208	0.442173
2_TAG0538	YIL053W	GPP1	2	TAG0538	0.431191	1.60752	0.419963	0.44242
2_TAG0539	YHR206W	SKN7	2	TAG0539	0.394342	1.75773	0.393973	0.394712
2_TAG0540	YNL099C	OCA1	2	TAG0540	0.368367	1.88167	0.375962	0.360772
2_TAG0541	YNR047W	FPK1	2	TAG0541	0.439435	1.57736	0.441855	0.437015
2_TAG0542	YDR014W	RAD61	2	TAG0542	0.416699	1.66343	0.408697	0.4247
2_TAG0543	YIL101C	XBP1	2	TAG0543	0.4317	1.60562	0.436212	0.427189
2_TAG0544	YLL039C	UBI4	2	TAG0544	0.439971	1.57544	0.439434	0.440508
2_TAG0545	YOR043W	WHI2	2	TAG0545	0.403874	1.71625	0.401758	0.40599
2_TAG0546	YPR017C	DSS4	2	TAG0546	0.373664	1.855	0.377543	0.369784
2_TAG0547	YNL299W	TRF5	2	TAG0547	0.416457	1.66439	0.418798	0.414116
2_TAG0548	YML016C	PPZ1	2	TAG0548	0.40688	1.70357	0.413134	0.400626
2_TAG0551	YOR177C	MPC54	2	TAG0551	0.385915	1.79611	0.376259	0.395571
2_TAG0552	YDR096W	GIS1	2	TAG0552	0.446756	1.55151	0.442022	0.451489
2_TAG0553	YER180C	ISC10	2	TAG0553	0.427133	1.62279	0.430214	0.424052
2_TAG0554	YLR227C	ADY4	2	TAG0554	0.434822	1.59409	0.427456	0.442188
2_TAG0555	YDR512C	EMI1	2	TAG0555	0.431285	1.60717	0.418572	0.443998
2_TAG0556	YGL170C	SPO74	2	TAG0556	0.43128	1.60718	0.428741	0.43382
2_TAG0557	YDL013W	SLX5	2	TAG0557	0.265241	2.61327	0.237368	0.293114
2_TAG0558	YER044C-A	MEI4	2	TAG0558	0.442195	1.56751	0.427199	0.457191
2_TAG0559	YGL033W	HOP2	2	TAG0559	0.439143	1.57841	0.428077	0.450209
2_TAG0560	YOL104C	NDJ1	2	TAG0560	0.423208	1.63784	0.427269	0.419146
2_TAG0561	YLR263W	RED1	2	TAG0561	0.429906	1.61232	0.429906
2_TAG0563	YLR394W	CST9	2	TAG0563	0.407451	1.70118	0.407393	0.407508
2_TAG0564	YDR206W	EBS1	2	TAG0564	0.429614	1.61342	0.440615	0.418613
2_TAG0565	YLR233C	EST1	2	TAG0565	0.389423	1.77994	0.4015	0.377345
2_TAG0566	YIL009C-A	EST3	2	TAG0566	0.352635	1.96562	0.373989	0.331281
2_TAG0567	YLR453C	RIF2	2	TAG0567	0.42965	1.61328	0.434514	0.424786
2_TAG0569	YBL032W	HEK2	2	TAG0569	0.422008	1.6425	0.433981	0.410035
2_TAG0570	YDR545W	YRF1-1	2	TAG0570	0.440985	1.57182	0.437486	0.444484
2_TAG0571	YER190W	YRF1-2	2	TAG0571	0.422738	1.63966	0.423711	0.421765
2_TAG0573	YNL339C	YRF1-6	2	TAG0573	0.449442	1.54224	0.458875	0.440009
2_TAG0574	YDR004W	RAD57	2	TAG0574	0.373407	1.85628	0.372048	0.374766
2_TAG0575	YDL059C	RAD59	2	TAG0575	0.411423	1.68476	0.401497	0.42135
2_TAG0576	YER095W	RAD51	2	TAG0576	0.398683	1.73859	0.397426	0.39994
2_TAG0577	YML032C	RAD52	2	TAG0577	0.326474	2.12313	0.338426	0.314523
2_TAG0579	YLR403W	SFP1	2	TAG0579	0.425554	1.62881	0.424572	0.426536
2_TAG0580	YNL153C	GIM3	2	TAG0580	0.40469	1.71279	0.405476	0.403904
2_TAG0581	YEL003W	GIM4	2	TAG0581	0.416422	1.66453	0.416198	0.416646
2_TAG0582	YML094W	GIM5	2	TAG0582	0.334066	2.07488	0.319919	0.348212
2_TAG0583	YGR078C	PAC10	2	TAG0583	0.348236	1.99045	0.360036	0.336436
2_TAG0584	YHR200W	RPN10	2	TAG0584	0.339565	2.04128	0.316556	0.362573
2_TAG0586	YLR097C	HRT3	2	TAG0586	0.443773	1.56194	0.436945	0.450601
2_TAG0589	YLR102C	APC9	2	TAG0589	0.304599	2.2756	0.304599
2_TAG0590	YFR036W	CDC26	2	TAG0590	0.402736	1.7211	0.402808	0.402663
2_TAG0593	YML088W	UFO1	2	TAG0593	0.421876	1.64301	0.410009	0.433744
2_TAG0594	YGL087C	MMS2	2	TAG0594	0.420952	1.64662	0.414264	0.427641
2_TAG0595	YGL058W	RAD6	2	TAG0595	0.296665	2.33646	0.318046	0.275284
2_TAG0596	YDL190C	UFD2	2	TAG0596	0.415589	1.66787	0.42274	0.408438
2_TAG0676	YGL078C	DBP3	2	TAG0676	0.378125	1.83312	0.377942	0.378308
2_TAG0677	YKR024C	DBP7	2	TAG0677	0.426329	1.62585	0.431429	0.421229
2_TAG0678	YGL173C	XRN1	2	TAG0678	0.426078	1.62681	0.413547	0.43861
2_TAG0679	YJL209W	CBP1	2	TAG0679	0.417374	1.66073	0.420324	0.414424
2_TAG0680	YLR256W	HAP1	2	TAG0680	0.413322	1.67701	0.412828	0.413816
2_TAG0681	YDR071C	PAA1	2	TAG0681	0.428485	1.61767	0.422282	0.434688
2_TAG0682	YER047C	SAP1	2	TAG0682	0.431676	1.60571	0.425558	0.437793
2_TAG0685	YMR019W	STB4	2	TAG0685	0.415221	1.66934	0.437443	0.392999
2_TAG0686	YOL042W	NGL1	2	TAG0686	0.403491	1.71787	0.407332	0.399651
2_TAG0687	YNR073C	YNR073C	2	TAG0687	0.423008	1.63862	0.419648	0.426367
2_TAG0688	YJL105W	SET4	2	TAG0688	0.441724	1.56919	0.446377	0.43707
2_TAG0689	YPL165C	SET6	2	TAG0689	0.406666	1.70446	0.415875	0.397458
2_TAG0690	YKL072W	STB6	2	TAG0690	0.391323	1.77129	0.406128	0.376519
2_TAG0691	YER130C	COM2	2	TAG0691	0.411867	1.68294	0.413158	0.410575
2_TAG0692	YER184C	TOG1	2	TAG0692	0.4348	1.59417	0.42676	0.44284
2_TAG0693	YJL057C	IKS1	2	TAG0693	0.425505	1.629	0.434027	0.416983
2_TAG0694	YJL103C	GSM1	2	TAG0694	0.395517	1.75251	0.403501	0.387534
2_TAG0695	YJL206C	YJL206C	2	TAG0695	0.450521	1.53855	0.468306	0.432736
2_TAG0696	YKL222C	YKL222C	2	TAG0696	0.447942	1.5474	0.463355	0.43253
2_TAG0697	YPL230W	USV1	2	TAG0697	0.451552	1.53503	0.448301	0.454802
2_TAG0698	YPR196W	YPR196W	2	TAG0698	0.446797	1.55137	0.447668	0.445925
2_TAG0699	YML017W	PSP2	2	TAG0699	0.443002	1.56466	0.441135	0.444868
2_TAG0700	YBR194W	AIM4	2	TAG0700	0.430115	1.61154	0.418554	0.441676
2_TAG0701	YDR169C	STB3	2	TAG0701	0.414129	1.67375	0.420685	0.407573
2_TAG0702	YER139C	RTR1	2	TAG0702	0.38331	1.80832	0.382488	0.384133
2_TAG0703	YIL137C	TMA108	2	TAG0703	0.441255	1.57085	0.445574	0.436935
2_TAG0705	YGL221C	NIF3	2	TAG0705	0.487174	1.42279	0.498631	0.475718
2_TAG0707	YDL053C	PBP4	2	TAG0707	0.426171	1.62645	0.410319	0.442023
2_TAG0708	YHR207C	SET5	2	TAG0708	0.432796	1.60156	0.420252	0.445341
2_TAG0709	YBR150C	TBS1	2	TAG0709	0.427311	1.62211	0.430667	0.423956
2_TAG0711	YBR239C	ERT1	2	TAG0711	0.434162	1.59652		0.434162
2_TAG0712	YJR119C	JHD2	2	TAG0712	0.430509	1.61006	0.436398	0.42462
2_TAG0713	YKR064W	OAF3	2	TAG0713	0.437423	1.58462	0.430087	0.444758
2_TAG0714	YLR327C	TMA10	2	TAG0714	0.379486	1.82654	0.392925	0.366047
2_TAG0716	YHL018W	YHL018W	2	TAG0716	0.427441	1.62162	0.411357	0.443524
2_TAG0717	YKL070W	YKL070W	2	TAG0717	0.413519	1.67622	0.424025	0.403012
2_TAG0718	YPR125W	YLH47	2	TAG0718	0.432775	1.60163	0.426143	0.439406
2_TAG0720	YDR026C	NSI1	2	TAG0720	0.440204	1.5746	0.446501	0.433907
2_TAG0722	YDL070W	BDF2	2	TAG0722	0.426202	1.62633	0.427817	0.424588
2_TAG0723	YNL215W	IES2	2	TAG0723	0.349084	1.98562	0.34572	0.352447
2_TAG0724	YOR189W	IES4	2	TAG0724	0.383116	1.80924	0.393862	0.372369
2_TAG0725	YER092W	IES5	2	TAG0725	0.3855	1.79805	0.388847	0.382154
2_TAG0726	YMR075W	RCO1	2	TAG0726	0.408338	1.69748	0.396048	0.420628
2_TAG0727	YDR257C	RKM4	2	TAG0727	0.430018	1.6119	0.427234	0.432803
2_TAG0728	YGR071C	ENV11	2	TAG0728	0.429051	1.61554	0.424705	0.433397
2_TAG0729	YIL130W	ASG1	2	TAG0729	0.403814	1.7165	0.410929	0.3967
2_TAG0730	YLR278C	YLR278C	2	TAG0730	0.435127	1.59298	0.433806	0.436448
2_TAG0731	YML081W	TDA9	2	TAG0731	0.416597	1.66383	0.406366	0.426827
2_TAG0732	YEL018W	EAF5	2	TAG0732	0.4156	1.66782	0.4126	0.418601
2_TAG0733	YJR082C	EAF6	2	TAG0733	0.403256	1.71888	0.408638	0.397874
2_TAG0734	YDR482C	CWC21	2	TAG0734	0.41347	1.67642	0.426556	0.400384
2_TAG0735	YPL064C	CWC27	2	TAG0735	0.399563	1.73476	0.399117	0.400009
2_TAG0736	YGR100W	MDR1	2	TAG0736	0.416894	1.66265	0.413208	0.420579
2_TAG0737	YNL175C	NOP13	2	TAG0737	0.43335	1.59951	0.440205	0.426496
2_TAG0738	YER041W	YEN1	2	TAG0738	0.437482	1.5844	0.45206	0.422905
2_TAG0739	YNL023C	FAP1	2	TAG0739	0.421587	1.64414	0.423105	0.420068
2_TAG0740	YJR127C	RSF2	2	TAG0740	0.411829	1.68309	0.408059	0.415599
2_TAG0741	YLL054C	YLL054C	2	TAG0741	0.428826	1.61638	0.405142	0.452511
2_TAG0742	YLR436C	ECM30	2	TAG0742	0.424421	1.63316	0.429485	0.419358
2_TAG0743	YMR176W	ECM5	2	TAG0743	0.45043	1.53886	0.442892	0.457969
2_TAG0744	YKR019C	IRS4	2	TAG0744	0.4403	1.57426	0.438464	0.442137
2_TAG0745	YBR065C	ECM2	2	TAG0745	0.414382	1.67273	0.423165	0.405599
2_TAG0748	YNL030W	HHF2	2	TAG0748	0.410484	1.68861	0.407802	0.413167
2_TAG0750	YDR225W	HTA1	2	TAG0750	0.427151	1.62272	0.438975	0.415328
2_TAG0751	YBL003C	HTA2	2	TAG0751	0.420296	1.64919	0.421407	0.419185
2_TAG0752	YBL002W	HTB2	2	TAG0752	0.407312	1.70176	0.403262	0.411362
2_TAG0753	YBR010W	HHT1	2	TAG0753	0.404052	1.71549	0.419173	0.388932
2_TAG0755	YDR073W	SNF11	2	TAG0755	0.434692	1.59457	0.427974	0.44141
2_TAG0756	YNR023W	SNF12	2	TAG0756	0.398909	1.73761	0.428613	0.369204
2_TAG0758	YBR289W	SNF5	2	TAG0758	0.283852	2.44193	0.27226	0.295445
2_TAG0759	YHL025W	SNF6	2	TAG0759	0.356282	1.9455	0.368224	0.344341
2_TAG0761	YDR334W	SWR1	2	TAG0761	0.405918	1.7076	0.405628	0.406209
2_TAG0762	YFL013C	IES1	2	TAG0762	0.404288	1.71449	0.394316	0.414261
2_TAG0763	YLR052W	IES3	2	TAG0763	0.400687	1.7299	0.387374	0.413999
2_TAG0764	YDL002C	NHP10	2	TAG0764	0.394768	1.75583	0.396271	0.393266
2_TAG0768	YMR044W	IOC4	2	TAG0768	0.419784	1.6512	0.414454	0.425114
2_TAG0769	YER164W	CHD1	2	TAG0769	0.405817	1.70803	0.409098	0.402536
2_TAG0770	YPL129W	TAF14	2	TAG0770	0.370682	1.86992	0.413605	0.32776
2_TAG0771	YJL127C	SPT10	2	TAG0771	0.450761	1.53773	0.439542	0.461979
2_TAG0772	YGL133W	ITC1	2	TAG0772	0.407077	1.70274	0.407739	0.406416
2_TAG0774	YAL011W	SWC3	2	TAG0774	0.348694	1.98784	0.354647	0.34274
2_TAG0775	YBR112C	CYC8	2	TAG0775	0.435645	1.59108	0.438093	0.433196
2_TAG0776	YDL076C	RXT3	2	TAG0776	0.410539	1.68838	0.414452	0.406625
2_TAG0777	YOL068C	HST1	2	TAG0777	0.431848	1.60507	0.425823	0.437873
2_TAG0778	YOR279C	RFM1	2	TAG0778	0.425034	1.6308	0.448518	0.401551
2_TAG0779	YDR439W	LRS4	2	TAG0779	0.386124	1.79514	0.396448	0.3758
2_TAG0781	YDR363W	ESC2	2	TAG0781	0.373158	1.85752	0.378392	0.367924
2_TAG0782	YDL197C	ASF2	2	TAG0782	0.423192	1.6379	0.428534	0.417849
2_TAG0783	YKR101W	SIR1	2	TAG0783	0.403414	1.71821	0.419127	0.3877
2_TAG0784	YMR127C	SAS2	2	TAG0784	0.407837	1.69957	0.410816	0.404858
2_TAG0785	YLL022C	HIF1	2	TAG0785	0.422835	1.63928	0.426515	0.419155
2_TAG0786	YPL015C	HST2	2	TAG0786	0.434298	1.59602	0.446179	0.422417
2_TAG0787	YDR191W	HST4	2	TAG0787	0.410787	1.68736	0.406235	0.415339
2_TAG0788	YOR025W	HST3	2	TAG0788	0.413124	1.67782	0.418807	0.407441
2_TAG0790	YBL052C	SAS3	2	TAG0790	0.433221	1.59999	0.434735	0.431707
2_TAG0791	YNL330C	RPD3	2	TAG0791	0.328947	2.10717	0.334255	0.323639
2_TAG0792	YMR263W	SAP30	2	TAG0792	0.366844	1.88949	0.373016	0.360672
2_TAG0794	YBR275C	RIF1	2	TAG0794	0.423138	1.63811	0.433725	0.412551
2_TAG0795	YAR003W	SWD1	2	TAG0795	0.389977	1.7774	0.411297	0.368658
2_TAG0796	YDR310C	SUM1	2	TAG0796	0.412824	1.67904	0.422603	0.403046
2_TAG0797	YDL074C	BRE1	2	TAG0797	0.38409	1.80465	0.389453	0.378726
2_TAG0798	YIL084C	SDS3	2	TAG0798	0.327648	2.11553	0.32192	0.333375
2_TAG0799	YLR270W	DCS1	2	TAG0799	0.417806	1.65902	0.416221	0.41939
2_TAG0800	YGL222C	EDC1	2	TAG0800	0.415865	1.66676	0.409871	0.421859
2_TAG0801	YER035W	EDC2	2	TAG0801	0.427849	1.62007	0.412281	0.443418
2_TAG0803	YEL015W	EDC3	2	TAG0803	0.414254	1.67324	0.429588	0.39892
2_TAG0804	YGR249W	MGA1	2	TAG0804	0.436991	1.58618	0.44057	0.433413
2_TAG0805	YKL038W	RGT1	2	TAG0805	0.399413	1.73541	0.401668	0.397158
2_TAG0806	YPR134W	MSS18	2	TAG0806	0.408989	1.69478	0.411195	0.406783
2_TAG0807	YIR021W	MRS1	2	TAG0807	0.382806	1.8107	0.379308	0.386303
2_TAG0808	YHL038C	CBP2	2	TAG0808	0.412533	1.68022	0.427652	0.397414
2_TAG0811	YGL066W	SGF73	2	TAG0811	0.355842	1.9479	0.359839	0.351846
2_TAG0812	YDR448W	ADA2	2	TAG0812	0.328214	2.11188	0.324131	0.332296
2_TAG0813	YLR055C	SPT8	2	TAG0813	0.390555	1.77478	0.37292	0.408189
2_TAG0814	YDR176W	NGG1	2	TAG0814	0.314444	2.20436	0.30968	0.319208
2_TAG0816	YPL116W	HOS3	2	TAG0816	0.409788	1.69148	0.414132	0.405443
2_TAG0817	YMR053C	STB2	2	TAG0817	0.43306	1.60058	0.426494	0.439626
2_TAG0818	YNL255C	GIS2	2	TAG0818	0.425343	1.62962	0.422679	0.428007
2_TAG0819	YGL252C	RTG2	2	TAG0819	0.414247	1.67327	0.419759	0.408735
2_TAG0820	YBR066C	NRG2	2	TAG0820	0.415796	1.66704	0.412854	0.418738
2_TAG0822	YBR212W	NGR1	2	TAG0822	0.354735	1.95398	0.360635	0.348835
2_TAG0823	YOR076C	SKI7	2	TAG0823	0.411752	1.68341	0.41107	0.412434
2_TAG0824	YPR189W	SKI3	2	TAG0824	0.39399	1.7593	0.398155	0.389824
2_TAG0825	YMR080C	NAM7	2	TAG0825	0.398231	1.74056	0.412036	0.384426
2_TAG0826	YGR072W	UPF3	2	TAG0826	0.410668	1.68785	0.414108	0.407227
2_TAG0827	YLR136C	TIS11	2	TAG0827	0.433002	1.60079	0.430577	0.435427
2_TAG0828	YHR077C	NMD2	2	TAG0828	0.408413	1.69717	0.419148	0.397679
2_TAG0829	YPR042C	PUF2	2	TAG0829	0.309238	2.24147	0.31167	0.306805
2_TAG0830	YLL013C	PUF3	2	TAG0830	0.423066	1.63839	0.425207	0.420925
2_TAG0831	YLR363C	NMD4	2	TAG0831	0.442551	1.56626	0.466824	0.418278
2_TAG0832	YNL016W	PUB1	2	TAG0832	0.424631	1.63235	0.436114	0.413147
2_TAG0833	YIR001C	SGN1	2	TAG0833	0.467722	1.48196	0.48277	0.452674
2_TAG0834	YER032W	FIR1	2	TAG0834	0.43842	1.58101	0.438394	0.438445
2_TAG0835	YGR178C	PBP1	2	TAG0835	0.418859	1.65485	0.415428	0.42229
2_TAG0836	YIL030C	SSM4	2	TAG0836	0.457123	1.51633	0.457123
2_TAG0837	YKL208W	CBT1	2	TAG0837	0.425143	1.63039	0.417849	0.432437
2_TAG0838	YGL094C	PAN2	2	TAG0838	0.357821	1.93713	0.414105	0.301538
2_TAG0839	YDR195W	REF2	2	TAG0839	0.365901	1.89436	0.360695	0.371107
2_TAG0841	YDL175C	AIR2	2	TAG0841	0.415787	1.66707	0.418085	0.41349
2_TAG0842	YIL079C	AIR1	2	TAG0842	0.413387	1.67675	0.412593	0.414181
2_TAG0843	YDR432W	NPL3	2	TAG0843	0.346188	2.00223	0.346188
2_TAG0844	YHR015W	MIP6	2	TAG0844	0.433654	1.59839	0.432607	0.434702
2_TAG0845	YJL140W	RPB4	2	TAG0845	0.352547	1.96611	0.364026	0.341069
2_TAG0847	YML062C	MFT1	2	TAG0847	0.409166	1.69405	0.425732	0.3926
2_TAG0849	YHR167W	THP2	2	TAG0849	0.395505	1.75256	0.394672	0.396339
2_TAG0850	YDR159W	SAC3	2	TAG0850	0.273512	2.53425	0.267762	0.279262
2_TAG0851	YDR395W	SXM1	2	TAG0851	0.41521	1.66939	0.405269	0.42515
2_TAG0853	YLR335W	NUP2	2	TAG0853	0.414035	1.67413	0.410478	0.417593
2_TAG0854	YMR129W	POM152	2	TAG0854	0.433038	1.60066	0.438374	0.427701
2_TAG0855	YDL088C	ASM4	2	TAG0855	0.384417	1.80311	0.392209	0.376625
2_TAG0856	YER107C	GLE2	2	TAG0856	0.311612	2.22439	0.330109	0.293115
2_TAG0858	YKL057C	NUP120	2	TAG0858	0.356865	1.94232	0.358279	0.355451
2_TAG0859	YKR082W	NUP133	2	TAG0859	0.267221	2.59391	0.276849	0.257592
2_TAG0860	YER105C	NUP157	2	TAG0860	0.441456	1.57014	0.437808	0.445104
2_TAG0861	YBL079W	NUP170	2	TAG0861	0.329598	2.10301	0.327413	0.331784
2_TAG0862	YML103C	NUP188	2	TAG0862	0.41413	1.67374	0.432825	0.395434
2_TAG0863	YDR192C	NUP42	2	TAG0863	0.434037	1.59698	0.435597	0.432477
2_TAG0864	YMR153W	NUP53	2	TAG0864	0.418613	1.65582	0.444953	0.392272
2_TAG0865	YDL116W	NUP84	2	TAG0865	0.245136	2.8276	0.244503	0.245769
2_TAG0866	YGL100W	SEH1	2	TAG0866	0.422066	1.64227	0.416319	0.427813
2_TAG0867	YML113W	DAT1	2	TAG0867	0.426287	1.62601	0.420699	0.431875
2_TAG0868	YER161C	SPT2	2	TAG0868	0.434215	1.59632	0.420995	0.447436
2_TAG0869	YDR443C	SSN2	2	TAG0869	0.392055	1.76798	0.396543	0.387567
2_TAG0870	YBR050C	REG2	2	TAG0870	0.421866	1.64305	0.418836	0.424896
2_TAG0871	YMR182C	RGM1	2	TAG0871	0.39991	1.73326	0.405982	0.393838
2_TAG0872	YNL167C	SKO1	2	TAG0872	0.4131	1.67792	0.418199	0.408002
2_TAG0873	YCR081W	SRB8	2	TAG0873	0.34203	2.02657	0.355643	0.328416
2_TAG0874	YOR140W	SFL1	2	TAG0874	0.411837	1.68306	0.415511	0.408162
2_TAG0875	YPR065W	ROX1	2	TAG0875	0.439187	1.57825	0.444173	0.4342
2_TAG0876	YKL005C	BYE1	2	TAG0876	0.411889	1.68285	0.426314	0.397463
2_TAG0877	YER028C	MIG3	2	TAG0877	0.434669	1.59466	0.43077	0.438567
2_TAG0879	YJL110C	GZF3	2	TAG0879	0.400352	1.73134	0.400564	0.400141
2_TAG0880	YDR005C	MAF1	2	TAG0880	0.425228	1.63006	0.433568	0.416888
2_TAG0882	YDR207C	UME6	2	TAG0882	0.347371	1.99541	0.333108	0.361633
2_TAG0883	YML029W	USA1	2	TAG0883	0.435026	1.59335	0.436804	0.433248
2_TAG0884	YDR163W	CWC15	2	TAG0884	0.433518	1.59889	0.413284	0.453751
2_TAG0885	YPR101W	SNT309	2	TAG0885	0.274116	2.52866	0.274597	0.273634
2_TAG0886	YMR125W	STO1	2	TAG0886	0.447849	1.54773	0.438935	0.456763
2_TAG0888	YBR119W	MUD1	2	TAG0888	0.421021	1.64635	0.4441	0.397943
2_TAG0889	YNL286W	CUS2	2	TAG0889	0.429671	1.6132	0.436544	0.422799
2_TAG0892	YPL213W	LEA1	2	TAG0892	0.380821	1.82014		0.380821
2_TAG0893	YJR050W	ISY1	2	TAG0893	0.428235	1.61862	0.429467	0.427002
2_TAG0894	YBR188C	NTC20	2	TAG0894	0.42441	1.6332	0.414932	0.433887
2_TAG0897	YOR308C	SNU66	2	TAG0897	0.430258	1.611	0.414181	0.446334
2_TAG0898	YHR165C	PRP8	2	TAG0898	0.448963	1.54389	0.453515	0.444411
2_TAG0899	YDR378C	LSM6	2	TAG0899	0.331878	2.08856	0.324296	0.33946
2_TAG0901	YOR185C	GSP2	2	TAG0901	0.417628	1.65972	0.417537	0.417718
2_TAG0902	YLR018C	POM34	2	TAG0902	0.397506	1.74374	0.381744	0.413268
2_TAG0903	YKR092C	SRP40	2	TAG0903	0.377838	1.83451	0.385785	0.369891
2_TAG0904	YAR002W	NUP60	2	TAG0904	0.368794	1.8795	0.378558	0.359029
2_TAG0905	YPR018W	RLF2	2	TAG0905	0.369262	1.87712	0.373088	0.365435
2_TAG0906	YOR023C	AHC1	2	TAG0906	0.454078	1.52649	0.449314	0.458842
2_TAG0907	YAL051W	OAF1	2	TAG0907	0.427974	1.6196	0.411897	0.444051
2_TAG0908	YOR363C	PIP2	2	TAG0908	0.427461	1.62154	0.441896	0.413026
2_TAG0909	YGR233C	PHO81	2	TAG0909	0.404579	1.71326	0.39852	0.410638
2_TAG0910	YFR034C	PHO4	2	TAG0910	0.438991	1.57896	0.440056	0.437926
2_TAG0912	YNL004W	HRB1	2	TAG0912	0.437039	1.58601	0.455346	0.418732
2_TAG0913	YKL214C	YRA2	2	TAG0913	0.46015	1.50635	0.466943	0.453356
2_TAG0914	YPL181W	CTI6	2	TAG0914	0.422822	1.63933	0.425853	0.419792
2_TAG0915	YIR018W	YAP5	2	TAG0915	0.442256	1.5673	0.433918	0.450593
2_TAG0916	YDR259C	YAP6	2	TAG0916	0.415165	1.66957	0.402191	0.42814
2_TAG0917	YOL028C	YAP7	2	TAG0917	0.447938	1.54742	0.442909	0.452968
2_TAG0918	YHR006W	STP2	2	TAG0918	0.423893	1.63519	0.399383	0.448403
2_TAG0919	YOR298C-A	MBF1	2	TAG0919	0.422191	1.64178	0.416467	0.427916
2_TAG0920	YBR182C	SMP1	2	TAG0920	0.395616	1.75207	0.392621	0.39861
2_TAG0921	YMR042W	ARG80	2	TAG0921	0.44081	1.57244	0.436664	0.444956
2_TAG0922	YOL108C	INO4	2	TAG0922	0.423121	1.63818	0.42693	0.419312
2_TAG0923	YPR005C	HAL1	2	TAG0923	0.413642	1.67572	0.423584	0.4037
2_TAG0924	YDR423C	CAD1	2	TAG0924	0.394432	1.75733	0.401785	0.387078
2_TAG0927	YDR421W	ARO80	2	TAG0927	0.452665	1.53126	0.452605	0.452725
2_TAG0928	YMR280C	CAT8	2	TAG0928	0.442013	1.56816	0.442013
2_TAG0929	YDR123C	INO2	2	TAG0929	0.397516	1.7437	0.395307	0.399725
2_TAG0930	YMR021C	MAC1	2	TAG0930	0.400741	1.72967	0.388557	0.412924
2_TAG0931	YKL015W	PUT3	2	TAG0931	0.415631	1.6677	0.430666	0.400595
2_TAG0933	YMR039C	SUB1	2	TAG0933	0.40411	1.71524	0.399242	0.408978
2_TAG0935	YGL071W	AFT1	2	TAG0935	0.425114	1.6305	0.435857	0.414371
2_TAG0936	YGL254W	FZF1	2	TAG0936	0.395979	1.75046	0.405122	0.386837
2_TAG0937	YDR463W	STP1	2	TAG0937	0.323806	2.14062	0.323806
2_TAG0939	YIR033W	MGA2	2	TAG0939	0.362707	1.91104	0.379001	0.346412
2_TAG0940	YKL020C	SPT23	2	TAG0940	0.414296	1.67307	0.415332	0.41326
2_TAG0944	YPR073C	LTP1	2	TAG0944	0.42446	1.63301	0.425268	0.423653
2_TAG0945	YGL208W	SIP2	2	TAG0945	0.410984	1.68655	0.404446	0.417522
2_TAG0946	YDR422C	SIP1	2	TAG0946	0.426002	1.6271	0.423823	0.42818
2_TAG0952	YGL213C	SKI8	2	TAG0952	0.366218	1.89272	0.367447	0.364988
2_TAG0954	YPL072W	UBP16	2	TAG0954	0.396349	1.74883	0.39527	0.397427
2_TAG0955	YNL186W	UBP10	2	TAG0955	0.325879	2.12701	0.342618	0.309139
2_TAG0956	YFR010W	UBP6	2	TAG0956	0.409022	1.69465	0.412395	0.405648
2_TAG0957	YMR223W	UBP8	2	TAG0957	0.375467	1.84609	0.381108	0.369826
2_TAG0958	YDR457W	TOM1	2	TAG0958	0.402072	1.72394	0.402947	0.401196
2_TAG0959	YDR335W	MSN5	2	TAG0959	0.417036	1.66208	0.415467	0.418605
2_TAG0960	YBR165W	UBS1	2	TAG0960	0.414176	1.67356	0.407479	0.420873
2_TAG0961	YIL149C	MLP2	2	TAG0961	0.40448	1.71368	0.399727	0.409233
2_TAG0963	YGL241W	KAP114	2	TAG0963	0.415869	1.66675	0.410687	0.42105
2_TAG0965	YJR132W	NMD5	2	TAG0965	0.255571	2.71215	0.261163	0.24998
2_TAG0967	YPL125W	KAP120	2	TAG0967	0.361139	1.91934	0.342122	0.380156
2_TAG0968	YBR017C	KAP104	2	TAG0968	0.432658	1.60207	0.436506	0.428809
2_TAG0969	YGL016W	KAP122	2	TAG0969	0.412274	1.68128	0.421176	0.403372
2_TAG0970	YJR147W	HMS2	2	TAG0970	0.437182	1.58549	0.435694	0.438671
2_TAG0971	YKL043W	PHD1	2	TAG0971	0.399798	1.73374	0.413804	0.385792
2_TAG0972	YIL010W	DOT5	2	TAG0972	0.391233	1.7717	0.406278	0.376187
2_TAG0973	YNL229C	URE2	2	TAG0973	0.328261	2.11158	0.332214	0.324307
2_TAG0974	YOL001W	PHO80	2	TAG0974	0.449984	1.54038	0.453914	0.446054
2_TAG0975	YNL278W	CAF120	2	TAG0975	0.422509	1.64055	0.413682	0.431337
2_TAG0976	YGR134W	CAF130	2	TAG0976	0.389928	1.77763	0.393519	0.386337
2_TAG0977	YNL288W	CAF40	2	TAG0977	0.401859	1.72485	0.418079	0.385638
2_TAG0978	YGL151W	NUT1	2	TAG0978	0.404618	1.71309	0.414028	0.395209
2_TAG0979	YMR179W	SPT21	2	TAG0979	0.351873	1.96988	0.355113	0.348632
2_TAG0980	YPL101W	ELP4	2	TAG0980	0.340695	2.03451	0.349697	0.331692
2_TAG0981	YGR200C	ELP2	2	TAG0981	0.309813	2.23731	0.315255	0.304371
2_TAG0982	YMR312W	ELP6	2	TAG0982	0.327756	2.11483	0.323082	0.33243
2_TAG0983	YHR187W	IKI1	2	TAG0983	0.313766	2.20912	0.323275	0.304257
2_TAG0984	YPL086C	ELP3	2	TAG0984	0.336116	2.06223	0.336592	0.335639
2_TAG0985	YLR384C	IKI3	2	TAG0985	0.332256	2.08618	0.332587	0.331926
2_TAG0986	YHL009C	YAP3	2	TAG0986	0.422327	1.64126	0.42103	0.423625
2_TAG0987	YAL021C	CCR4	2	TAG0987	0.412232	1.68145	0.407415	0.417049
2_TAG0988	YIL038C	NOT3	2	TAG0988	0.391093	1.77233	0.395422	0.386764
2_TAG0990	YNR052C	POP2	2	TAG0990	0.396279	1.74914	0.404479	0.388079
2_TAG0993	YBR089C-A	NHP6B	2	TAG0993	0.428081	1.6192	0.419689	0.436474
2_TAG0994	YBL005W	PDR3	2	TAG0994	0.434362	1.59578	0.430197	0.438527
2_TAG0997	YIR017C	MET28	2	TAG0997	0.435747	1.59071	0.440881	0.430612
2_TAG0998	YDR043C	NRG1	2	TAG0998	0.403558	1.71759	0.412593	0.394523
2_TAG0999	YGL013C	PDR1	2	TAG0999	0.4518	1.53419	0.443432	0.460169
2_TAG1000	YJL056C	ZAP1	2	TAG1000	0.384353	1.80341	0.391684	0.377022
2_TAG1001	YHR099W	TRA1	2	TAG1001	0.439953	1.5755	0.431872	0.448034
2_TAG1002	YOL004W	SIN3	2	TAG1002	0.376893	1.83911	0.389609	0.364176
2_TAG1003	YAL013W	DEP1	2	TAG1003	0.370746	1.8696	0.374496	0.366997
2_TAG1004	YER088C	DOT6	2	TAG1004	0.437889	1.58293	0.43336	0.442418
2_TAG1005	YNL136W	EAF7	2	TAG1005	0.439772	1.57615		0.439772
2_TAG1006	YGL115W	SNF4	2	TAG1006	0.25164	2.75452	0.261806	0.241474
2_TAG1007	YOR047C	STD1	2	TAG1007	0.441483	1.57004	0.436876	0.44609
2_TAG1008	YGL035C	MIG1	2	TAG1008	0.427113	1.62286	0.424836	0.429391
2_TAG1009	YIR023W	DAL81	2	TAG1009	0.409114	1.69427	0.402092	0.416136
2_TAG1010	YLR451W	LEU3	2	TAG1010	0.426944	1.62351	0.424875	0.429013
2_TAG1011	YGL209W	MIG2	2	TAG1011	0.439129	1.57846	0.437483	0.440774
2_TAG1012	YJL089W	SIP4	2	TAG1012	0.435313	1.5923	0.447646	0.422979
2_TAG1013	YPR009W	SUT2	2	TAG1013	0.420398	1.64879	0.415646	0.42515
2_TAG1014	YFL031W	HAC1	2	TAG1014	0.437019	1.58608	0.442744	0.431294
2_TAG1015	YGL162W	SUT1	2	TAG1015	0.410983	1.68656	0.414639	0.407326
2_TAG1016	YDL170W	UGA3	2	TAG1016	0.426312	1.62592	0.415182	0.437441
2_TAG1017	YPL038W	MET31	2	TAG1017	0.418454	1.65645	0.412017	0.424892
2_TAG1018	YFL028C	CAF16	2	TAG1018	0.412744	1.67936	0.414291	0.411198
2_TAG1020	YKR036C	CAF4	2	TAG1020	0.430369	1.61059	0.427723	0.433014
2_TAG1021	YPL127C	HHO1	2	TAG1021	0.402111	1.72377	0.413575	0.390646
2_TAG1024	YGR063C	SPT4	2	TAG1024	0.310396	2.23311	0.310415	0.310376
2_TAG1025	YDR009W	GAL3	2	TAG1025	0.428005	1.61948	0.415071	0.44094
2_TAG1026	YML051W	GAL80	2	TAG1026	0.452632	1.53137	0.446702	0.458562
2_TAG1027	YNL027W	CRZ1	2	TAG1027	0.392939	1.76401	0.384803	0.401075
2_TAG1028	YLR098C	CHA4	2	TAG1028	0.425352	1.62958	0.423715	0.42699
2_TAG1029	YGR288W	MAL13	2	TAG1029	0.435928	1.59005	0.442768	0.429089
2_TAG1030	YBR297W	MAL33	2	TAG1030	0.431316	1.60705	0.425792	0.436841
2_TAG1031	YLR014C	PPR1	2	TAG1031	0.419368	1.65284	0.419006	0.41973
2_TAG1032	YPL248C	GAL4	2	TAG1032	0.405722	1.70843	0.407482	0.403963
2_TAG1033	YML076C	WAR1	2	TAG1033	0.434253	1.59618	0.431698	0.436809
2_TAG1034	YNL239W	LAP3	2	TAG1034	0.430399	1.61047	0.426587	0.434212
2_TAG1035	YML007W	YAP1	2	TAG1035	0.389496	1.7796	0.399122	0.379869
2_TAG1037	YKL062W	MSN4	2	TAG1037	0.429974	1.61207	0.430854	0.429095
2_TAG1038	YLR266C	PDR8	2	TAG1038	0.428379	1.61807	0.426528	0.43023
2_TAG1039	YMR037C	MSN2	2	TAG1039	0.426342	1.6258	0.419936	0.432749
2_TAG1041	YPL133C	RDS2	2	TAG1041	0.432879	1.60125	0.441043	0.424716
2_TAG1043	YPL029W	SUV3	2	TAG1043	0.41455	1.67205	0.410886	0.418213
2_TAG1044	YMR287C	DSS1	2	TAG1044	0.423715	1.63588	0.415201	0.432229
2_TAG1045	YKL149C	DBR1	2	TAG1045	0.41565	1.66762	0.410296	0.421004
2_TAG1046	YOL054W	PSH1	2	TAG1046	0.420034	1.65022	0.423128	0.416939
2_TAG1047	YLR418C	CDC73	2	TAG1047	0.410422	1.68886	0.407191	0.413654
2_TAG1049	YNL230C	ELA1	2	TAG1049	0.429135	1.61522	0.437913	0.420357
2_TAG1050	YPL046C	ELC1	2	TAG1050	0.375107	1.84786	0.373787	0.376427
2_TAG1051	YPR129W	SCD6	2	TAG1051	0.420465	1.64853	0.419349	0.421581
2_TAG1052	YHR121W	LSM12	2	TAG1052	0.444535	1.55926	0.44854	0.440529
2_TAG1053	YHL034C	SBP1	2	TAG1053	0.386824	1.79189	0.394238	0.37941
2_TAG1054	YLR107W	REX3	2	TAG1054	0.420543	1.64822	0.408893	0.432192
2_TAG1055	YLR059C	REX2	2	TAG1055	0.407521	1.70089	0.408867	0.406175
2_TAG1056	YOR017W	PET127	2	TAG1056	0.381443	1.81717	0.387065	0.375822
2_TAG1057	YMR180C	CTL1	2	TAG1057	0.355444	1.95009	0.352236	0.358652
2_TAG1058	YFL001W	DEG1	2	TAG1058	0.32765	2.11551	0.334767	0.320533
2_TAG1059	YDR194C	MSS116	2	TAG1059	0.390112	1.77679	0.377989	0.402235
2_TAG1060	YJL133W	MRS3	2	TAG1060	0.436642	1.58745	0.415141	0.458142
2_TAG1061	YKR052C	MRS4	2	TAG1061	0.427256	1.62232	0.423529	0.430983
2_TAG1062	YMR285C	NGL2	2	TAG1062	0.418002	1.65824	0.4164	0.419604
2_TAG1063	YLR293C	GSP1	2	TAG1063	0.342149	2.02586	0.332326	0.351972
2_TAG1064	YPL157W	TGS1	2	TAG1064	0.329228	2.10537	0.328299	0.330157
2_TAG1065	YPR057W	BRR1	2	TAG1065	0.35461	1.95467	0.352353	0.356868
2_TAG1066	YIR005W	IST3	2	TAG1066	0.338281	2.04903	0.326237	0.350326
2_TAG1067	YHL027W	RIM101	2	TAG1067	0.434362	1.59578	0.428993	0.439732
2_TAG1068	YDR392W	SPT3	2	TAG1068	0.367233	1.88749	0.373516	0.360949
2_TAG1069	YLR399C	BDF1	2	TAG1069	0.425402	1.62939	0.418733	0.432071
2_TAG1071	YOR337W	TEA1	2	TAG1071	0.421885	1.64298	0.429781	0.413988
2_TAG1072	YMR070W	MOT3	2	TAG1072	0.420179	1.64965	0.426285	0.414073
2_TAG1073	YMR136W	GAT2	2	TAG1073	0.433876	1.59757	0.431248	0.436504
2_TAG1074	YLR013W	GAT3	2	TAG1074	0.421222	1.64556	0.416269	0.426175
2_TAG1075	YIR013C	GAT4	2	TAG1075	0.425522	1.62894	0.427307	0.423736
2_TAG1076	YMR228W	MTF1	2	TAG1076	0.392468	1.76613	0.37589	0.409046
2_TAG1078	YDR156W	RPA14	2	TAG1078	0.376478	1.84114	0.362491	0.390465
2_TAG1080	YJL148W	RPA34	2	TAG1080	0.372671	1.85994	0.381075	0.364267
2_TAG1082	YOR295W	UAF30	2	TAG1082	0.234383	2.95733	0.268102	0.200664
2_TAG1084	YOL051W	GAL11	2	TAG1084	0.266078	2.60505	0.301	0.231155
2_TAG1085	YPR070W	MED1	2	TAG1085	0.384408	1.80315	0.385174	0.383643
2_TAG1086	YDL005C	MED2	2	TAG1086	0.312605	2.21733	0.345989	0.27922
2_TAG1088	YNL236W	SIN4	2	TAG1088	0.376302	1.842	0.404423	0.34818
2_TAG1089	YHR041C	SRB2	2	TAG1089	0.295238	2.34776	0.300712	0.289763
2_TAG1092	YOR123C	LEO1	2	TAG1092	0.412809	1.6791	0.409498	0.41612
2_TAG1093	YGL244W	RTF1	2	TAG1093	0.369689	1.87495	0.377011	0.362366
2_TAG1094	YOL145C	CTR9	2	TAG1094	0.426981	1.62337	0.434369	0.419592
2_TAG1097	YNR010W	CSE2	2	TAG1097	0.371735	1.86463	0.369052	0.374418
2_TAG1099	YPL047W	SGF11	2	TAG1099	0.400408	1.7311	0.397789	0.403028
2_TAG1100	YBL103C	RTG3	2	TAG1100	0.389823	1.77811	0.402888	0.376758
2_TAG1101	YER045C	ACA1	2	TAG1101	0.437518	1.58427	0.418779	0.456258
2_TAG1102	YPR008W	HAA1	2	TAG1102	0.421881	1.64299	0.418396	0.425367
2_TAG1103	YNL257C	SIP3	2	TAG1103	0.404698	1.71275	0.408892	0.400504
2_TAG1105	YGL166W	CUP2	2	TAG1105	0.42428	1.6337	0.426844	0.421716
2_TAG1106	YIL036W	CST6	2	TAG1106	0.424413	1.63319	0.418764	0.430061
2_TAG1107	YPL177C	CUP9	2	TAG1107	0.412517	1.68029	0.419687	0.405347
2_TAG1108	YCR065W	HCM1	2	TAG1108	0.414037	1.67412	0.421161	0.406913
2_TAG1109	YOL089C	HAL9	2	TAG1109	0.424565	1.63261	0.426876	0.422254
2_TAG1110	YFL021W	GAT1	2	TAG1110	0.436548	1.58779	0.449703	0.423392
2_TAG1112	YPL202C	AFT2	2	TAG1112	0.428695	1.61688	0.434453	0.422936
2_TAG1113	YNL314W	DAL82	2	TAG1113	0.428911	1.61606	0.437832	0.41999
2_TAG1114	YOR179C	SYC1	2	TAG1114	0.390564	1.77474	0.389622	0.391506
2_TAG1115	YDR216W	ADR1	2	TAG1115	0.437986	1.58258	0.434783	0.441189
2_TAG1117	YKR034W	DAL80	2	TAG1117	0.341959	2.02699	0.342147	0.341771
2_TAG1119	YHR178W	STB5	2	TAG1119	0.409623	1.69216	0.39849	0.420757
2_TAG1121	YKL109W	HAP4	2	TAG1121	0.409665	1.69199	0.410974	0.408355
2_TAG1122	YGL237C	HAP2	2	TAG1122	0.405726	1.70841	0.407344	0.404108
2_TAG1123	YBL021C	HAP3	2	TAG1123	0.396389	1.74865	0.377896	0.414882
2_TAG1124	YOR358W	HAP5	2	TAG1124	0.409802	1.69142	0.403068	0.416536
2_TAG1125	YER063W	THO1	2	TAG1125	0.439025	1.57883	0.439812	0.438238
2_TAG1126	YMR012W	CLU1	2	TAG1126	0.401491	1.72643	0.395239	0.407744
2_TAG1127	YPL119C	DBP1	2	TAG1127	0.418555	1.65605	0.414559	0.422551
2_TAG1129	YKL054C	DEF1	2	TAG1129	0.383836	1.80584	0.40772	0.359951
2_TAG1130	YDR143C	SAN1	2	TAG1130	0.401787	1.72516	0.406426	0.397148
2_TAG1131	YNL085W	MKT1	2	TAG1131	0.436182	1.58912	0.431996	0.440367
2_TAGbre1	BRE1_Plate2	BRE1	2	TAGbre1	0.374047	1.8531	0.38681	0.361284
2_TAGDOT1OE	DOT1OE_Plate2	DOT1OE	2	TAGDOT1OE	0.44086	1.57226	0.440919	0.440801
2_TAGH3K18R	H3K18R_Plate2	H3K18R	2	TAGH3K18R	0.295934	2.34224	0.315293	0.276575
2_TAGH4d	H4del_Plate2	H4del	2	TAGH4d	0.172641	4.01496		0.172641
3_TAG0001	YDR534C	FIT1	3	TAG0001	0.424116	1.63434	0.416467	0.431764
3_TAG0003	YOR383C	FIT3	3	TAG0003	0.428057	1.61929	0.435861	0.420253
3_TAG0004	YJR150C	DAN1	3	TAG0004	0.421297	1.64527	0.422885	0.41971
3_TAG0005	YPL163C	SVS1	3	TAG0005	0.424679	1.63217	0.424585	0.424772
3_TAG0006	YFL010W-A	AUA1	3	TAG0006	0.367732	1.88492	0.389842	0.345623
3_TAG0008	YBL086C	YBL086C	3	TAG0008	0.420436	1.64864	0.426939	0.413933
3_TAG0009	YGR201C	YGR201C	3	TAG0009	0.393229	1.7627	0.396142	0.390317
3_TAG0010	YMR279C	YMR279C	3	TAG0010	0.356812	1.94261	0.355382	0.358242
3_TAG0011	YCR045C	RRT12	3	TAG0011	0.427343	1.62199	0.427875	0.426811
3_TAG0012	YIL170W	HXT12_noSGDORF	3	TAG0012	0.424187	1.63406	0.41252	0.435854
3_TAG0013	YJL165C	HAL5	3	TAG0013	0.43196	1.60466	0.423189	0.44073
3_TAG0014	YIL009W	FAA3	3	TAG0014	0.43943	1.57738	0.442321	0.436539
3_TAG0015	YKL198C	PTK1	3	TAG0015	0.383508	1.80739	0.39	0.377015
3_TAG0016	YLL019C	KNS1	3	TAG0016	0.439355	1.57765	0.445127	0.433583
3_TAG0017	YPR200C	ARR2	3	TAG0017	0.438261	1.58159	0.436099	0.440423
3_TAG0018	YDR277C	MTH1	3	TAG0018	0.421058	1.6462	0.420603	0.421512
3_TAG0019	YPL244C	HUT1	3	TAG0019	0.431917	1.60482	0.433229	0.430604
3_TAG0020	YEL062W	NPR2	3	TAG0020	0.397504	1.74375	0.414437	0.380571
3_TAG0021	YIR036C	IRC24	3	TAG0021	0.438695	1.58002	0.439799	0.437591
3_TAG0022	YOR267C	HRK1	3	TAG0022	0.426968	1.62342	0.41394	0.439997
3_TAG0023	YPL026C	SKS1	3	TAG0023	0.422788	1.63947	0.414429	0.431148
3_TAG0025	YNL264C	PDR17	3	TAG0025	0.428859	1.61626	0.436081	0.421637
3_TAG0027	YOR031W	CRS5_noSGDORF	3	TAG0027	0.448482	1.54554	0.466298	0.430666
3_TAG0028	YGR088W	CTT1	3	TAG0028	0.432796	1.60155	0.423702	0.44189
3_TAG0029	YPL226W	NEW1	3	TAG0029	0.353904	1.95857	0.348377	0.359432
3_TAG0031	YNL077W	APJ1	3	TAG0031	0.433089	1.60047	0.4587	0.407479
3_TAG0033	YDR515W	SLF1	3	TAG0033	0.443666	1.56232	0.44158	0.445752
3_TAG0034	YJR049C	UTR1	3	TAG0034	0.344694	2.0109	0.349218	0.34017
3_TAG0035	YGL227W	VID30	3	TAG0035	0.423705	1.63592	0.422498	0.424913
3_TAG0036	YDL125C	HNT1	3	TAG0036	0.429181	1.61505	0.441504	0.416858
3_TAG0037	YNL231C	PDR16	3	TAG0037	0.321404	2.15662		0.321404
3_TAG0039	YMR186W	HSC82	3	TAG0039	0.460191	1.50622	0.47466	0.445721
3_TAG0041	YKL213C	DOA1	3	TAG0041	0.421903	1.64291	0.417222	0.426583
3_TAG0042	YBR173C	UMP1	3	TAG0042	0.322091	2.15202	0.323298	0.320884
3_TAG0046	YMR038C	CCS1	3	TAG0046	0.348625	1.98823	0.36792	0.329331
3_TAG0047	YJL145W	SFH5	3	TAG0047	0.416871	1.66274	0.407338	0.426404
3_TAG0048	YLR043C	TRX1	3	TAG0048	0.44485	1.55816	0.468534	0.421166
3_TAG0049	YGR209C	TRX2	3	TAG0049	0.397003	1.74595	0.393964	0.400042
3_TAG0051	YLL055W	YCT1	3	TAG0051	0.3979	1.74201	0.391929	0.403871
3_TAG0052	YKL008C	LAC1	3	TAG0052	0.40256	1.72185	0.398854	0.406266
3_TAG0054	YHR123W	EPT1	3	TAG0054	#NUM!	#NUM!
3_TAG0055	YNR039C	ZRG17	3	TAG0055	0.429691	1.61313	0.417877	0.441506
3_TAG0056	YBR132C	AGP2	3	TAG0056	0.401282	1.72733	0.406121	0.396444
3_TAG0057	YNL291C	MID1	3	TAG0057	0.390632	1.77443	0.390932	0.390331
3_TAG0058	YLR205C	HMX1	3	TAG0058	0.420581	1.64807	0.437554	0.403608
3_TAG0059	YLR242C	ARV1	3	TAG0059	0.231441	2.99492	0.246327	0.216554
3_TAG0060	YEL065W	SIT1	3	TAG0060	0.438243	1.58165	0.450131	0.426356
3_TAG0061	YHL040C	ARN1	3	TAG0061	0.446117	1.55373	0.453195	0.439039
3_TAG0063	YKL174C	TPO5	3	TAG0063	0.427903	1.61987	0.423334	0.432472
3_TAG0064	YOR079C	ATX2	3	TAG0064	0.439525	1.57704	0.440488	0.438561
3_TAG0065	YDR270W	CCC2	3	TAG0065	0.430934	1.60848	0.433493	0.428374
3_TAG0066	YJR040W	GEF1	3	TAG0066	0.423131	1.63814	0.433107	0.413156
3_TAG0067	YBR036C	CSG2	3	TAG0067	0.41318	1.67759	0.414836	0.411524
3_TAG0068	YAL058W	CNE1	3	TAG0068	0.371972	1.86344	0.364326	0.379618
3_TAG0069	YER060W	FCY21	3	TAG0069	0.431251	1.60729	0.448286	0.414216
3_TAG0070	YER060W-A	FCY22	3	TAG0070	0.426206	1.62632	0.456135	0.396276
3_TAG0071	YHR048W	YHK8	3	TAG0071	0.433474	1.59905	0.434288	0.432661
3_TAG0072	YCR075C	ERS1	3	TAG0072	0.385414	1.79845	0.410513	0.360316
3_TAG0075	YKR039W	GAP1	3	TAG0075	0.426123	1.62664	0.413197	0.439049
3_TAG0077	YLR411W	CTR3	3	TAG0077	0.42874	1.61671	0.427883	0.429598
3_TAG0078	YGL255W	ZRT1	3	TAG0078	0.425354	1.62958	0.400146	0.450562
3_TAG0080	YIL121W	QDR2	3	TAG0080	0.404269	1.71457	0.405437	0.403101
3_TAG0081	YPR194C	OPT2	3	TAG0081	0.408062	1.69863	0.401679	0.414445
3_TAG0082	YML123C	PHO84	3	TAG0082	0.412101	1.68198	0.413332	0.41087
3_TAG0084	YBR008C	FLR1	3	TAG0084	0.414714	1.67139	0.410132	0.419296
3_TAG0085	YGR055W	MUP1	3	TAG0085	0.439784	1.57611	0.442233	0.437335
3_TAG0086	YHL036W	MUP3	3	TAG0086	0.299781	2.31218	0.289655	0.309908
3_TAG0088	YGL084C	GUP1	3	TAG0088	0.224523	3.0872	0.26114	0.187907
3_TAG0089	YBR295W	PCA1	3	TAG0089	0.36547	1.89659	0.358725	0.372215
3_TAG0090	YKL064W	MNR2	3	TAG0090	0.432709	1.60188	0.440297	0.425122
3_TAG0091	YDR497C	ITR1	3	TAG0091	0.440567	1.57331	0.437946	0.443189
3_TAG0092	YOL103W	ITR2	3	TAG0092	0.433381	1.5994	0.426062	0.440699
3_TAG0096	YGR197C	SNG1	3	TAG0096	0.45762	1.51468	0.475445	0.439794
3_TAG0097	YIL013C	PDR11	3	TAG0097	0.419963	1.65049	0.423048	0.416879
3_TAG0098	YKR103W	NFT1	3	TAG0098	0.429616	1.61341	0.423321	0.435911
3_TAG0099	YKR104W	YKR104W	3	TAG0099	0.431262	1.60725	0.429641	0.432882
3_TAG0100	YOL075C	YOL075C	3	TAG0100	0.429445	1.61405	0.43968	0.41921
3_TAG0101	YAL067C	SEO1	3	TAG0101	0.386478	1.7935	0.38977	0.383186
3_TAG0102	YCL073C	GEX1	3	TAG0102	0.387942	1.78673	0.391396	0.384487
3_TAG0104	YOR071C	NRT1	3	TAG0104	0.425807	1.62784	0.419644	0.43197
3_TAG0105	YOR192C	THI72	3	TAG0105	0.424649	1.63228	0.439592	0.409707
3_TAG0106	YDL054C	MCH1	3	TAG0106	0.378434	1.83162	0.367436	0.389431
3_TAG0107	YKL221W	MCH2	3	TAG0107	0.418586	1.65593	0.432346	0.404826
3_TAG0108	YOR306C	MCH5	3	TAG0108	0.425187	1.63022	0.424197	0.426177
3_TAG0109	YJL036W	SNX4	3	TAG0109	0.436933	1.58639	0.446347	0.427518
3_TAG0110	YBR298C	MAL31	3	TAG0110	0.401417	1.72675	0.41851	0.384323
3_TAG0111	YGR289C	MAL11	3	TAG0111	0.426352	1.62576	0.43476	0.417945
3_TAG0112	YLR220W	CCC1	3	TAG0112	0.432037	1.60437	0.432001	0.432074
3_TAG0113	YAL022C	FUN26	3	TAG0113	0.33956	2.04131	0.290578	0.388542
3_TAG0114	YPR037C	ERV2	3	TAG0114	0.461441	1.50214	0.434673	0.488209
3_TAG0116	YJR095W	SFC1	3	TAG0116	0.430322	1.61076	0.444137	0.416508
3_TAG0118	YPR021C	AGC1	3	TAG0118	0.446319	1.55303	0.455335	0.437303
3_TAG0119	YBR291C	CTP1	3	TAG0119	0.41575	1.66722	0.411039	0.42046
3_TAG0120	YER154W	OXA1	3	TAG0120	0.403772	1.71668	0.392259	0.415286
3_TAG0121	YPL060W	MFM1	3	TAG0121	0.425274	1.62988	0.42867	0.421879
3_TAG0122	YOR334W	MRS2	3	TAG0122	0.44161	1.56959	0.469217	0.414004
3_TAG0123	YOR222W	ODC2	3	TAG0123	0.4515	1.53521	0.460112	0.442889
3_TAG0124	YLR188W	MDL1	3	TAG0124	0.422115	1.64208	0.409377	0.434854
3_TAG0125	YKL120W	OAC1	3	TAG0125	0.446266	1.55321	0.456754	0.435778
3_TAG0126	YDL119C	HEM25	3	TAG0126	0.430002	1.61196	0.423343	0.436661
3_TAG0127	YEL006W	YEA6	3	TAG0127	0.414838	1.67089	0.425565	0.404111
3_TAG0129	YPR058W	YMC1	3	TAG0129	0.420207	1.64954	0.431986	0.408428
3_TAG0130	YBR104W	YMC2	3	TAG0130	0.440269	1.57437	0.454158	0.426381
3_TAG0131	YMR166C	MME1	3	TAG0131	0.402922	1.7203	0.424792	0.381053
3_TAG0132	YPR011C	YPR011C	3	TAG0132	0.430583	1.60979	0.431173	0.429993
3_TAG0133	YNL083W	SAL1	3	TAG0133	0.431501	1.60636	0.448622	0.414379
3_TAG0134	YIL006W	YIA6	3	TAG0134	0.426956	1.62346	0.412932	0.44098
3_TAG0135	YMR241W	YHM2	3	TAG0135	0.414005	1.67425	0.404823	0.423186
3_TAG0136	YGR096W	TPC1	3	TAG0136	0.426119	1.62665	0.425344	0.426895
3_TAG0137	YPR067W	ISA2	3	TAG0137	0.36911	1.87789	0.375692	0.362528
3_TAG0138	YJR135W-A	TIM8	3	TAG0138	0.39737	1.74434	0.411957	0.382783
3_TAG0139	YGR181W	TIM13	3	TAG0139	0.447603	1.54858	0.449651	0.445554
3_TAG0141	YKL040C	NFU1	3	TAG0141	0.4165	1.66422	0.41603	0.416971
3_TAG0142	YOR226C	ISU2	3	TAG0142	0.420763	1.64736	0.408974	0.432551
3_TAG0143	YLL027W	ISA1	3	TAG0143	0.402593	1.72171	0.399635	0.405551
3_TAG0144	YFL036W	RPO41	3	TAG0144	0.332467	2.08486	0.329332	0.335601
3_TAG0146	YLR348C	DIC1	3	TAG0146	0.451458	1.53535	0.466136	0.436781
3_TAG0147	YJL112W	MDV1	3	TAG0147	0.409105	1.6943	0.40621	0.412001
3_TAG0148	YGR028W	MSP1	3	TAG0148	0.388218	1.78546	0.386325	0.390111
3_TAG0149	YDR470C	UGO1	3	TAG0149	0.308521	2.24668	0.288185	0.328857
3_TAG0151	YOR045W	TOM6	3	TAG0151	0.377794	1.83472	0.373504	0.382084
3_TAG0152	YNL070W	TOM7	3	TAG0152	0.437371	1.5848	0.433346	0.441397
3_TAG0153	YNL121C	TOM70	3	TAG0153	0.389363	1.78021	0.388544	0.390181
3_TAG0154	YIL134W	FLX1	3	TAG0154	0.345198	2.00797	0.330117	0.360278
3_TAG0156	YOR037W	CYC2	3	TAG0156	0.42913	1.61524	0.42259	0.43567
3_TAG0157	YER053C	PIC2	3	TAG0157	0.422744	1.63964	0.432603	0.412886
3_TAG0158	YDR046C	BAP3	3	TAG0158	0.436989	1.58619	0.446956	0.427021
3_TAG0162	YNL318C	HXT14	3	TAG0162	0.465521	1.48897	0.473984	0.457057
3_TAG0163	YFL011W	HXT10	3	TAG0163	0.417156	1.6616	0.41399	0.420323
3_TAG0165	YDR342C	HXT7	3	TAG0165	0.441555	1.56979	0.435669	0.44744
3_TAG0166	YIL114C	POR2	3	TAG0166	0.441951	1.56838	0.442726	0.441176
3_TAG0167	YMR177W	MMT1	3	TAG0167	0.409086	1.69438	0.400841	0.417331
3_TAG0168	YPL224C	MMT2	3	TAG0168	0.427975	1.6196	0.429101	0.426849
3_TAG0169	YPL135W	ISU1	3	TAG0169	0.429099	1.61536	0.438917	0.41928
3_TAG0170	YKL217W	JEN1	3	TAG0170	0.380344	1.82242	0.382498	0.37819
3_TAG0171	YOR317W	FAA1	3	TAG0171	0.408803	1.69555	0.419468	0.398138
3_TAG0172	YER015W	FAA2	3	TAG0172	0.435972	1.58989	0.427265	0.444679
3_TAG0173	YHR050W	SMF2	3	TAG0173	0.413399	1.6767	0.425804	0.400993
3_TAG0174	YPL134C	ODC1	3	TAG0174	0.441534	1.56986	0.43995	0.443118
3_TAG0175	YJL094C	KHA1	3	TAG0175	0.417832	1.65891	0.418	0.417663
3_TAG0176	YGR260W	TNA1	3	TAG0176	0.384899	1.80086	0.390728	0.379069
3_TAG0177	YDR256C	CTA1	3	TAG0177	0.427601	1.62101	0.424431	0.430771
3_TAG0178	YJR077C	MIR1	3	TAG0178	0.398031	1.74144	0.401143	0.394918
3_TAG0180	YEL030W	ECM10	3	TAG0180	0.410571	1.68825	0.410217	0.410925
3_TAG0182	YDR011W	SNQ2	3	TAG0182	0.437465	1.58446	0.429005	0.445925
3_TAG0185	YOR011W	AUS1	3	TAG0185	0.416381	1.66469	0.422215	0.410548
3_TAG0186	YNR070W	PDR18	3	TAG0186	0.413536	1.67615	0.417336	0.409736
3_TAG0187	YNR055C	HOL1	3	TAG0187	0.423942	1.63501	0.410273	0.437611
3_TAG0188	YNL125C	ESBP6	3	TAG0188	0.426174	1.62644	0.435478	0.41687
3_TAG0190	YNR002C	ATO2	3	TAG0190	0.365523	1.89632	0.371774	0.359272
3_TAG0192	YGR257C	MTM1	3	TAG0192	0.386037	1.79555	0.38415	0.387923
3_TAG0193	YOR316C	COT1	3	TAG0193	0.372413	1.86123	0.38471	0.360115
3_TAG0194	YOR197W	MCA1	3	TAG0194	0.396266	1.7492	0.400901	0.391631
3_TAG0195	YER048C	CAJ1	3	TAG0195	0.41266	1.6797	0.417271	0.408049
3_TAG0196	YHR127W	YHR127W	3	TAG0196	0.416929	1.6625	0.426978	0.406881
3_TAG0197	YDR205W	MSC2	3	TAG0197	0.415148	1.66964	0.417436	0.412859
3_TAG0198	YCL025C	AGP1	3	TAG0198	0.429919	1.61227	0.444165	0.415673
3_TAG0199	YFL055W	AGP3	3	TAG0199	0.337	2.05682	0.34087	0.33313
3_TAG0200	YBR068C	BAP2	3	TAG0200	0.40465	1.71296	0.411578	0.397721
3_TAG0202	YPL265W	DIP5	3	TAG0202	0.427365	1.62191	0.432305	0.422425
3_TAG0203	YGR121C	MEP1	3	TAG0203	0.424159	1.63417	0.426451	0.421868
3_TAG0204	YPR138C	MEP3	3	TAG0204	0.443852	1.56166	0.453828	0.433876
3_TAG0205	YOL020W	TAT2	3	TAG0205	0.401069	1.72825	0.403849	0.398289
3_TAG0206	YGR224W	AZR1	3	TAG0206	0.413772	1.67519	0.413982	0.413563
3_TAG0207	YNL270C	ALP1	3	TAG0207	0.418826	1.65498	0.427493	0.410159
3_TAG0208	YGR217W	CCH1	3	TAG0208	0.396944	1.74621	0.412129	0.381758
3_TAG0209	YDL247W	MPH2	3	TAG0209	0.426118	1.62666	0.437766	0.41447
3_TAG0210	YJR160C	MPH3	3	TAG0210	0.41335	1.6769	0.410422	0.416278
3_TAG0212	YGL077C	HNM1	3	TAG0212	0.409417	1.69301	0.404443	0.414391
3_TAG0213	YPR124W	CTR1	3	TAG0213	0.367772	1.88472	0.3647	0.370845
3_TAG0214	YNL065W	AQR1	3	TAG0214	0.416862	1.66277	0.421364	0.41236
3_TAG0215	YCR098C	GIT1	3	TAG0215	0.420802	1.6472	0.422125	0.419479
3_TAG0216	YHR094C	HXT1	3	TAG0216	0.412734	1.6794	0.424426	0.401042
3_TAG0217	YOL156W	HXT11	3	TAG0217	0.420659	1.64777	0.418541	0.422777
3_TAG0218	YEL069C	HXT13	3	TAG0218	0.403417	1.71819	0.407442	0.399392
3_TAG0222	YMR011W	HXT2	3	TAG0222	0.436741	1.58709	0.441864	0.431618
3_TAG0223	YDR345C	HXT3	3	TAG0223	0.406223	1.70632	0.409565	0.402882
3_TAG0224	YHR092C	HXT4	3	TAG0224	0.413389	1.67674	0.430832	0.395945
3_TAG0225	YHR096C	HXT5	3	TAG0225	0.431947	1.6047	0.433801	0.430093
3_TAG0226	YJL214W	HXT8	3	TAG0226	0.432236	1.60363	0.423832	0.44064
3_TAG0227	YJL219W	HXT9	3	TAG0227	0.44181	1.56888	0.441868	0.441751
3_TAG0228	YER145C	FTR1	3	TAG0228	0.432561	1.60243	0.427425	0.437696
3_TAG0229	YMR058W	FET3	3	TAG0229	0.401128	1.72799	0.39012	0.412137
3_TAG0231	YKL220C	FRE2	3	TAG0231	0.43583	1.59041	0.514414	0.357245
3_TAG0232	YNR060W	FRE4	3	TAG0232	0.395716	1.75163	0.389655	0.401777
3_TAG0233	YLR130C	ZRT2	3	TAG0233	0.44166	1.56941	0.443992	0.439328
3_TAG0235	YLR138W	NHA1	3	TAG0235	0.440983	1.57182	0.453913	0.428054
3_TAG0236	YOR328W	PDR10	3	TAG0236	0.450951	1.53708	0.449948	0.451954
3_TAG0237	YML116W	ATR1	3	TAG0237	0.415551	1.66802	0.425046	0.406056
3_TAG0238	YOR348C	PUT4	3	TAG0238	0.412193	1.68161	0.416412	0.407974
3_TAG0239	YKR093W	PTR2	3	TAG0239	0.397744	1.7427	0.391219	0.404268
3_TAG0240	YBR296C	PHO89	3	TAG0240	0.417017	1.66216	0.413598	0.420435
3_TAG0241	YJL093C	TOK1	3	TAG0241	0.431006	1.60821	0.416968	0.445043
3_TAG0242	YJL129C	TRK1	3	TAG0242	0.411712	1.68357	0.419908	0.403515
3_TAG0244	YNL142W	MEP2	3	TAG0244	0.433222	1.59998	0.458253	0.408192
3_TAG0245	YER056C	FCY2	3	TAG0245	0.414431	1.67253	0.418543	0.410319
3_TAG0246	YPL036W	PMA2	3	TAG0246	0.444257	1.56024	0.466208	0.422305
3_TAG0247	YOR018W	ROD1	3	TAG0247	0.413036	1.67817	0.407898	0.418175
3_TAG0248	YPL274W	SAM3	3	TAG0248	0.452989	1.53016	0.458092	0.447886
3_TAG0249	YLL061W	MMP1	3	TAG0249	0.438792	1.57967	0.451251	0.426334
3_TAG0250	YDR040C	ENA1	3	TAG0250	0.431438	1.6066	0.424333	0.438544
3_TAG0252	YBR294W	SUL1	3	TAG0252	0.441503	1.56997	0.45527	0.427737
3_TAG0253	YLR092W	SUL2	3	TAG0253	0.44806	1.547	0.453521	0.442599
3_TAG0254	YPL092W	SSU1	3	TAG0254	0.436848	1.5867	0.446291	0.427406
[truncated: 2,154 more rows]

## Sheet: raw_UpTag
	1_t0_A	2_t0_A	3_t0_A	4_t0_A	5_t0_A	1_t1_A	2_t1_A	3_t1_A	4_t1_A	5_t1_A	1_t0_B	2_t0_B	3_t0_B	4_t0_B	5_t0_B	1_t1_B	2_t1_B	3_t1_B	4_t1_B	5_t1_B
UPTAG0001	1640	1071	882	539	0	1570	1214	919	345	0	1828	1220	1364	1123	0	1291	981	1745	1113	0
UPTAG0002	949	953	698	553	0	987	925	825	329	0	1253	1136	773	945	0	957	794	1159	1110	0
UPTAG0003	1076	871	690	852	734	1097	932	770	410	737	1229	943	692	897	903	1001	734	907	1026	902
UPTAG0004	843	847	871	684	680	794	971	823	404	828	1057	965	795	782	967	685	874	999	783	1064
UPTAG0005	742	1423	637	958	633	710	1401	772	549	707	950	1680	606	643	857	659	1248	887	744	1078
UPTAG0006	321	450	214	299	232	429	505	261	132	294	447	423	239	276	312	50	230	278	344	433
UPTAG0007	925	820	793	739	662	813	835	777	603	737	1150	895	728	725	919	857	682	1129	786	1039
UPTAG0008	929	823	813	778	679	899	945	958	602	761	1252	962	775	745	998	943	705	1184	794	1094
UPTAG0009	701	674	765	564	575	681	603	881	365	696	830	608	629	604	654	283	436	759	616	796
UPTAG0010	914	958	660	849	868	916	1137	639	599	767	1041	869	501	722	839	820	687	602	717	657
UPTAG0011	863	892	810	821	845	870	1009	842	516	936	889	837	693	858	822	561	695	930	873	974
UPTAG0012	1108	1237	1185	676	0	1057	1228	1121	413	0	1101	989	735	1062	0	851	746	1015	969	0
UPTAG0013	686	789	781	797	0	674	856	832	430	1	1000	1066	973	927	0	741	824	1284	912	0
UPTAG0014	1079	786	765	770	0	852	895	734	535	0	1192	958	683	787	0	869	736	958	811	0
UPTAG0015	660	768	493	532	0	695	776	539	555	0	892	846	468	792	0	510	750	543	833	0
UPTAG0016	978	906	849	881	241	883	978	954	818	196	1122	990	730	741	359	965	888	931	702	246
UPTAG0017	1085	777	785	837	0	1001	811	899	646	0	1355	873	665	729	0	933	663	975	630	0
UPTAG0018	835	845	806	689	0	826	852	831	367	0	825	827	587	690	0	558	573	818	656	0
UPTAG0019	858	548	765	634	808	782	529	925	359	852	947	647	748	589	993	731	463	993	733	1180
UPTAG0020	804	969	723	800	796	864	1080	854	472	878	911	886	607	683	1014	711	721	731	701	1102
UPTAG0021	844	701	830	732	755	843	648	926	404	893	857	603	755	645	926	797	432	1120	689	1229
UPTAG0022	955	1025	930	706	738	952	1022	950	483	800	1056	976	631	790	852	614	770	948	749	963
UPTAG0023	820	826	913	978	0	845	919	979	599	1	954	911	624	940	0	683	702	940	871	0
UPTAG0024	836	782	0	823	795	839	756	0	632	990	837	695	2	997	880	574	529	0	871	1109
UPTAG0025	892	816	668	1095	670	851	957	729	628	654	1147	1315	917	1353	766	974	962	1165	1182	723
UPTAG0026	631	737	635	789	659	679	790	497	475	641	826	1100	623	791	810	692	846	718	841	984
UPTAG0027	279	376	308	267	229	326	370	349	133	302	337	493	257	242	320	31	277	322	291	389
UPTAG0028	758	667	797	844	728	762	615	774	521	648	768	774	637	720	811	688	512	961	711	607
UPTAG0029	936	747	523	926	964	866	815	459	534	943	967	871	347	693	890	616	695	410	736	770
UPTAG0030	1083	740	1	705	732	999	709	0	470	841	976	725	0	750	932	633	521	0	715	1072
UPTAG0031	755	914	801	647	819	849	882	901	387	792	781	873	644	597	890	436	636	881	726	1038
UPTAG0032	707	947	0	817	782	700	926	0	596	875	757	841	0	789	880	495	626	0	771	1061
UPTAG0033	852	970	1028	706	771	781	976	1067	502	846	820	895	765	719	889	757	653	1124	652	1070
UPTAG0034	993	780	535	433	706	995	802	465	288	747	1449	690	381	581	810	727	490	395	522	896
UPTAG0035	778	778	767	665	0	782	853	769	453	1	947	838	600	830	0	572	637	750	738	0
UPTAG0036	1044	905	778	794	0	981	1007	910	506	0	941	1163	709	932	0	686	863	1009	874	0
UPTAG0037	736	1455	73	1009	841	706	1486	24	542	849	850	2004	725	825	906	623	1546	616	874	985
UPTAG0038	685	839	0	592	778	758	817	0	427	867	734	1035	0	778	988	543	789	0	867	1165
UPTAG0039	1024	509	931	814	709	972	435	1171	505	833	888	507	742	663	893	570	272	1001	704	1096
UPTAG0040	735	893	918	746	846	683	807	858	553	930	704	815	656	765	912	484	618	806	655	953
UPTAG0041	991	923	701	743	748	894	1072	698	434	782	934	905	562	704	801	738	748	681	711	898
UPTAG0042	846	848	858	791	1023	865	842	727	474	1123	884	802	596	702	908	569	709	423	707	1082
UPTAG0045	947	924	0	481	752	902	1021	0	496	894	837	809	0	820	915	649	767	0	885	984
UPTAG0046	643	846	482	677	695	673	976	432	271	721	723	957	471	646	741	490	694	398	687	831
UPTAG0047	938	823	839	636	670	859	927	829	391	798	994	792	605	758	898	620	772	931	700	856
UPTAG0048	794	0	499	488	700	717	0	645	256	767	691	0	669	604	707	541	0	751	755	839
UPTAG0049	897	959	1410	1114	823	811	960	1412	705	924	1024	1288	1379	882	945	690	1005	1937	870	1028
UPTAG0050	820	755	0	750	207	857	785	0	485	160	875	949	0	787	548	730	727	0	693	315
UPTAG0051	612	657	920	642	664	627	708	864	392	703	649	732	799	676	772	464	596	1038	602	817
UPTAG0052	817	784	1316	812	832	828	777	1180	528	940	779	780	827	740	956	627	670	1154	655	1139
UPTAG0054	856	942	942	1105	1164	840	1047	1043	592	1204	775	909	730	848	1000	589	707	1070	840	1172
UPTAG0055	1150	812	890	725	860	1072	906	1022	481	933	1044	747	635	719	824	627	667	1016	747	993
UPTAG0056	1020	620	871	630	868	860	505	1051	390	906	898	567	722	725	929	539	374	983	677	1023
UPTAG0057	1102	805	805	665	883	992	846	859	395	947	1044	835	664	940	941	648	679	878	824	1071
UPTAG0058	1099	835	753	549	730	1046	861	783	222	781	1114	885	748	646	763	927	610	825	783	830
UPTAG0059	1033	568	304	0	755	910	594	195	0	841	943	729	323	0	877	571	484	218	2	1135
UPTAG0060	352	322	237	275	262	344	335	329	125	346	458	347	217	251	318	32	302	332	291	417
UPTAG0061	1269	779	745	1151	917	1192	843	832	664	968	1205	1000	742	917	997	770	721	1127	999	1116
UPTAG0062	589	768	0	629	770	692	755	0	348	860	795	871	0	752	921	556	716	0	758	987
UPTAG0063	382	334	263	265	65	410	362	390	136	53	407	397	282	283	95	67	266	425	263	57
UPTAG0064	1019	665	904	743	885	946	713	906	536	882	810	895	693	678	859	702	701	1018	631	1011
UPTAG0065	644	1094	828	792	868	405	1060	905	510	969	570	1005	623	678	969	325	780	831	732	1006
UPTAG0066	0	751	670	678	904	0	789	772	365	972	0	705	611	562	832	1	616	766	590	992
UPTAG0067	996	770	947	707	809	959	849	915	408	888	878	735	922	681	865	669	614	1137	708	1064
UPTAG0068	456	625	677	434	778	321	556	624	122	865	395	557	482	409	706	118	421	548	499	878
UPTAG0069	1036	907	720	623	875	1002	860	903	351	927	1056	890	728	844	970	841	747	820	819	1056
UPTAG0070	579	508	505	387	472	589	472	597	147	421	585	479	568	494	544	408	354	618	531	484
UPTAG0071	840	707	797	788	796	827	705	936	476	811	968	1078	692	961	930	866	693	1108	878	1158
UPTAG0072	245	0	256	216	183	294	0	304	78	252	363	0	246	240	251	35	0	399	246	329
UPTAG0073	8	15	3	12	21	15	12	9	4	30	11	13	10	8	18	5	9	16	12	18
UPTAG0075	961	805	608	539	732	933	857	730	200	771	855	811	610	671	816	536	679	701	676	874
UPTAG0076	3	3	2	2	3	1	3	0	0	2	6	1	1	5	5	0	2	2	3	2
UPTAG0077	761	869	736	782	711	768	907	804	530	802	838	949	543	750	895	599	717	799	697	1033
UPTAG0078	1025	941	1161	669	810	926	873	1170	522	876	890	839	705	646	925	655	728	972	540	1152
UPTAG0079	1133	1106	636	598	736	1052	1072	639	496	886	1029	939	514	708	900	834	703	664	740	1017
UPTAG0080	835	714	815	637	0	864	779	828	258	0	1043	833	655	742	0	485	730	875	734	0
UPTAG0081	882	620	897	623	820	801	586	910	368	825	828	721	659	681	814	597	567	875	766	940
UPTAG0082	5	869	593	654	776	0	870	616	473	801	0	947	489	836	893	0	863	713	798	978
UPTAG0083	937	818	0	677	608	842	758	0	529	556	930	923	0	818	761	573	743	0	749	726
UPTAG0084	810	798	700	472	863	720	878	730	501	990	862	966	653	691	1120	473	800	1079	707	1222
UPTAG0085	867	1091	784	1006	1278	771	1208	846	654	1381	1272	831	951	923	1273	921	717	1345	885	1359
UPTAG0086	853	829	617	822	701	873	837	455	237	577	871	890	793	554	873	202	623	560	652	780
UPTAG0087	827	872	0	852	0	772	887	0	519	0	879	981	0	714	0	466	672	0	722	1
UPTAG0088	805	863	479	906	972	747	769	339	489	1093	852	768	353	773	1166	662	512	209	761	1254
UPTAG0089	996	825	563	619	75	941	879	489	459	39	951	818	477	764	132	771	740	501	690	50
UPTAG0090	820	583	892	669	777	865	504	922	381	816	948	615	724	647	958	683	360	924	735	1027
UPTAG0091	923	0	696	816	858	897	1	765	462	967	953	0	651	829	1066	759	0	875	809	1210
UPTAG0092	549	867	880	749	1081	352	1022	978	510	1167	533	960	793	789	1377	225	880	1185	794	1583
UPTAG0093	990	1624	0	802	1141	1018	1715	0	390	1406	1078	1822	1	744	1057	635	1541	0	767	1381
UPTAG0094	935	896	0	675	1088	947	954	0	587	1280	1075	818	0	684	941	602	716	0	654	1242
UPTAG0095	825	921	0	844	917	861	974	0	546	1021	1026	1027	0	762	977	394	874	0	875	1085
UPTAG0096	525	0	914	753	1586	591	0	1136	271	1815	761	0	1386	443	1608	493	0	1552	750	1878
UPTAG0097	0	969	864	578	967	0	1039	881	376	906	0	1103	1084	1025	950	2	1034	1392	1013	954
UPTAG0098	837	1060	739	0	1	887	1154	826	0	0	1256	1190	731	0	0	845	990	979	0	0
UPTAG0099	1035	925	995	955	805	921	891	1015	624	799	1344	1009	784	990	920	675	768	1181	925	1053
UPTAG0100	713	834	569	514	818	695	825	576	446	834	845	817	729	710	1192	593	722	886	819	1233
UPTAG0101	829	0	615	919	722	873	0	656	456	711	851	0	790	907	962	571	0	960	774	1000
UPTAG0102	834	685	800	574	0	802	732	720	428	0	735	670	784	630	0	404	588	1026	594	2
UPTAG0103	810	819	658	775	0	831	814	687	502	0	869	997	841	817	0	641	670	1050	725	0
UPTAG0104	917	914	775	940	0	867	891	893	436	0	864	893	690	965	0	603	727	930	862	0
UPTAG0105	913	960	626	1276	0	846	924	781	500	0	1016	795	707	741	0	601	636	892	904	2
UPTAG0106	1301	950	388	743	1	1199	1072	399	524	0	1112	867	393	1017	0	840	673	392	1009	0
UPTAG0107	1340	1032	775	870	0	1303	1049	949	386	0	922	991	770	901	0	672	801	963	955	0
UPTAG0108	957	754	950	0	688	898	813	1022	0	492	783	770	670	0	770	447	609	929	0	451
UPTAG0109	804	706	650	597	706	783	775	712	394	774	917	783	756	934	988	716	611	887	829	1181
UPTAG0110	888	1	1038	536	0	840	0	975	413	0	946	0	875	961	0	703	0	1122	907	0
UPTAG0111	790	567	1039	1206	606	784	556	1075	687	593	885	889	875	1034	877	686	599	989	920	1119
UPTAG0112	723	646	908	878	1044	853	603	943	519	1026	931	773	634	572	956	686	609	840	651	1054
UPTAG0113	725	569	388	655	701	752	502	280	386	798	777	540	402	646	903	513	394	409	669	1133
UPTAG0114	0	793	758	627	710	0	776	864	379	855	0	885	576	748	1066	0	630	837	713	1168
UPTAG0115	807	832	481	2	787	809	883	662	0	824	857	781	503	0	891	594	665	721	0	1014
UPTAG0116	879	627	774	712	0	796	608	875	372	0	934	630	942	661	0	730	405	1116	716	0
UPTAG0117	893	0	0	715	765	795	0	0	415	771	980	0	0	770	878	731	0	1	611	980
UPTAG0118	786	879	747	943	585	817	892	919	540	667	742	880	636	705	649	589	638	827	736	794
UPTAG0119	825	915	918	1000	795	838	918	847	523	891	834	873	643	1007	813	416	712	923	988	946
UPTAG0120	0	766	613	721	845	0	821	540	508	862	0	1062	577	954	862	0	833	660	817	856
UPTAG0121	695	779	749	970	680	708	817	890	611	733	929	1055	876	930	938	696	794	1325	943	1151
UPTAG0122	511	726	434	423	632	594	850	624	488	772	686	676	659	535	734	548	553	596	894	785
UPTAG0123	698	634	610	1152	640	744	694	734	459	639	796	742	603	740	733	553	613	706	783	764
UPTAG0124	907	865	940	962	774	835	833	986	647	789	1092	805	722	757	792	729	708	918	823	851
UPTAG0125	1146	995	643	670	789	957	936	924	487	877	1055	800	643	768	860	758	574	874	821	1046
UPTAG0126	1017	916	827	585	803	880	836	823	402	836	882	724	670	625	781	598	581	832	597	973
UPTAG0127	927	1001	1005	706	883	864	1003	1158	416	857	935	789	735	698	953	478	650	1047	804	1098
UPTAG0128	440	514	0	380	430	390	597	0	219	476	455	563	0	348	534	269	468	0	310	644
UPTAG0129	792	1326	686	535	837	777	1352	877	339	915	828	984	721	683	891	579	748	932	727	991
UPTAG0130	719	0	777	541	760	753	0	895	388	675	814	0	737	923	682	786	0	935	911	767
UPTAG0131	675	702	437	857	794	675	701	435	322	854	743	722	685	662	767	599	517	625	832	815
UPTAG0132	565	773	625	820	734	479	728	738	466	776	692	876	700	942	780	368	636	1092	819	949
UPTAG0133	659	745	741	654	725	675	798	879	316	770	826	1005	1001	758	832	639	849	1121	713	994
UPTAG0134	952	431	938	681	858	886	464	904	415	968	911	529	731	804	970	683	420	1029	790	1007
UPTAG0135	801	739	1145	783	749	804	816	1139	412	796	823	933	723	794	900	663	694	920	728	1044
UPTAG0136	0	738	706	765	996	0	765	811	381	1021	0	807	543	691	893	2	723	870	726	1014
UPTAG0137	763	948	663	809	458	769	915	537	623	420	684	762	385	558	584	602	558	424	583	455
UPTAG0138	784	787	858	635	799	671	802	715	546	846	601	692	638	522	701	499	581	604	610	772
UPTAG0139	869	0	836	716	811	843	0	981	520	880	808	0	636	662	915	773	0	968	626	1007
UPTAG0140	567	802	0	782	711	349	816	0	674	807	461	692	0	686	720	152	563	0	734	948
UPTAG0141	895	854	823	560	838	829	880	849	310	942	893	879	729	759	830	785	609	1010	720	1022
UPTAG0142	0	853	742	583	710	0	932	748	437	808	0	1043	605	749	783	0	730	853	700	945
UPTAG0143	441	805	805	661	751	500	885	741	492	919	569	991	675	757	835	439	762	806	718	1034
UPTAG0144	675	836	282	489	768	596	831	174	481	796	727	996	396	1053	937	606	747	285	986	1131
UPTAG0146	710	654	659	645	750	730	565	842	344	755	713	651	768	625	744	535	469	945	766	860
UPTAG0147	947	735	802	729	1099	871	719	872	443	1029	851	844	703	731	956	608	619	908	594	1204
UPTAG0148	644	450	683	747	810	580	399	612	490	837	591	511	530	696	886	348	307	722	730	1076
UPTAG0149	1869	657	349	2025	1500	1685	619	223	1309	1761	1609	649	251	1610	1683	964	484	206	1482	1806
UPTAG0151	836	745	928	590	839	830	896	808	359	885	766	762	802	703	823	652	612	895	761	946
UPTAG0152	0	677	793	569	933	0	681	836	399	985	0	733	614	700	882	0	629	876	663	1076
UPTAG0153	932	670	838	651	751	899	781	889	460	798	869	767	658	674	902	579	595	943	645	992
UPTAG0154	785	0	574	1513	845	637	1	434	988	896	695	0	457	2176	989	421	0	399	1871	1130
UPTAG0155	968	0	0	737	0	799	0	0	484	0	945	0	0	805	0	499	0	0	811	0
UPTAG0156	1068	844	602	856	744	1095	970	680	569	751	1176	1145	783	845	962	831	963	1125	751	1112
UPTAG0157	573	748	617	854	1041	502	772	692	533	1015	682	1049	718	804	1159	448	806	970	743	1094
UPTAG0158	933	718	632	804	732	817	802	781	448	742	864	824	749	843	833	772	632	943	922	907
UPTAG0161	1	10	0	4	6	3	5	0	0	2	2	5	0	1	2	0	4	0	0	12
UPTAG0162	871	0	736	736	228	787	0	766	485	123	750	0	697	693	161	545	0	864	675	70
UPTAG0163	889	0	760	664	806	963	0	865	440	888	730	0	657	641	822	345	0	917	643	1011
UPTAG0165	878	154	754	576	574	825	126	805	416	601	859	294	557	781	736	795	141	767	790	794
UPTAG0166	629	812	753	610	715	428	914	805	408	728	625	925	693	707	854	313	761	876	736	932
UPTAG0167	798	487	526	766	516	727	568	575	680	554	825	609	562	769	619	403	421	849	638	760
UPTAG0168	879	706	650	1724	839	959	785	686	1136	869	1048	1090	819	1711	1253	809	894	1186	1770	1322
UPTAG0169	2	348	761	660	823	0	249	727	562	852	0	383	641	739	995	0	239	918	616	1261
UPTAG0170	3	76	600	0	774	0	42	573	0	815	0	228	536	0	828	0	78	708	0	990
UPTAG0171	631	0	527	636	630	611	0	708	291	662	637	0	438	553	774	131	0	596	654	805
UPTAG0172	871	776	638	640	1834	886	769	747	337	1848	837	795	593	629	1987	463	599	732	602	2032
UPTAG0173	785	808	715	825	748	753	936	864	420	820	752	888	684	786	853	478	721	882	817	1026
UPTAG0174	503	637	852	749	663	434	494	872	397	709	466	467	667	694	787	296	394	828	634	865
UPTAG0175	825	813	799	823	735	873	869	923	481	814	794	1136	587	701	806	578	897	829	763	870
UPTAG0176	618	660	516	651	732	633	696	516	384	772	539	662	443	664	769	344	517	618	608	922
UPTAG0177	1	722	862	692	870	0	754	910	475	920	0	808	689	832	936	2	734	756	779	1071
UPTAG0178	752	550	633	669	764	767	506	592	321	893	812	646	549	573	830	551	457	587	618	926
UPTAG0179	555	784	1	899	735	522	792	0	533	789	607	890	0	864	914	425	707	0	747	1275
UPTAG0180	861	723	723	777	658	774	786	704	499	657	1014	1054	825	903	896	632	843	1134	836	977
UPTAG0181	870	0	0	1	0	888	0	0	0	0	1007	0	0	0	0	778	0	0	0	0
UPTAG0182	537	789	784	886	0	339	896	813	645	0	552	861	721	718	0	195	649	977	733	0
UPTAG0183	614	848	0	783	713	708	861	0	372	813	736	777	0	504	841	522	623	0	659	860
UPTAG0184	778	977	0	730	0	709	973	0	359	0	881	1034	0	746	0	558	801	0	704	0
UPTAG0185	869	957	611	646	790	871	1000	681	465	842	964	883	573	732	976	634	721	782	828	1134
UPTAG0186	829	886	836	652	578	824	1033	898	382	398	949	957	712	725	746	754	787	966	705	504
UPTAG0187	772	777	649	866	733	673	828	690	465	892	838	796	561	1298	867	619	710	802	1329	1135
UPTAG0188	904	0	711	730	754	770	0	952	442	628	904	0	730	763	837	549	1	1057	699	736
UPTAG0189	900	1248	0	879	665	864	1273	0	613	694	875	1002	0	904	621	595	842	0	839	592
UPTAG0190	825	0	781	870	927	789	0	791	507	940	990	0	667	769	1041	606	0	773	717	1038
UPTAG0191	475	848	67	864	271	304	928	56	455	262	485	1009	42	751	131	137	723	39	702	100
UPTAG0192	733	899	490	942	707	745	911	443	515	795	869	1076	557	1137	662	533	846	606	966	673
UPTAG0193	711	370	613	533	0	732	298	562	286	0	904	390	818	668	0	424	188	965	763	0
UPTAG0194	996	423	902	270	773	826	427	929	116	734	1033	473	882	510	876	522	336	1160	280	1075
UPTAG0195	807	695	695	629	486	788	694	807	544	512	1066	920	671	927	502	489	692	1037	773	573
UPTAG0196	718	788	795	693	376	648	821	911	482	290	1158	1006	843	854	309	746	665	1173	819	231
UPTAG0197	751	756	628	731	360	732	819	831	442	291	820	852	583	705	293	516	700	869	775	225
UPTAG0198	658	808	622	657	489	626	772	803	339	519	751	765	618	586	461	483	661	821	651	517
UPTAG0199	839	881	567	678	729	812	889	500	381	786	1107	820	559	684	913	775	629	597	674	1156
UPTAG0200	805	974	689	719	774	831	958	782	414	782	945	921	602	813	1136	556	698	750	833	1099
UPTAG0201	845	899	1	904	149	806	974	0	512	77	826	748	0	924	347	734	669	0	848	180
UPTAG0202	268	522	970	1225	749	256	369	950	803	770	376	501	721	1008	958	250	253	939	903	1015
UPTAG0203	922	1229	1046	804	0	866	1092	1090	521	0	947	1060	782	802	0	687	834	1081	930	1
UPTAG0204	312	2	834	842	1109	176	0	994	498	1333	363	0	725	1026	1168	134	0	961	1029	1386
UPTAG0205	266	622	735	1011	907	128	675	798	584	1023	424	1257	696	1162	1089	74	1100	1075	1036	1413
UPTAG0206	639	473	849	1038	627	399	398	909	562	687	966	689	741	830	729	425	398	1127	781	763
UPTAG0207	794	700	908	1110	601	770	829	988	628	626	865	1009	819	940	737	639	812	1117	808	749
UPTAG0208	766	0	646	934	785	707	0	624	476	720	959	0	497	687	838	590	1	634	753	931
UPTAG0209	607	416	565	1090	772	532	360	793	621	868	676	383	575	663	751	485	239	735	737	982
UPTAG0210	879	898	389	587	702	822	877	363	263	775	802	683	432	570	800	710	522	494	698	1018
UPTAG0211	697	762	0	665	634	720	775	0	333	661	797	795	0	553	760	369	502	0	490	772
UPTAG0212	791	931	865	620	859	667	1009	857	450	1022	835	758	607	677	1041	505	612	872	637	1190
UPTAG0213	706	0	642	445	705	719	0	542	364	748	668	0	482	509	839	475	0	568	543	1030
UPTAG0214	604	632	707	579	649	640	631	731	384	681	768	654	661	614	725	495	493	839	645	908
UPTAG0215	2	700	789	713	1540	0	665	845	448	1643	0	845	632	762	1852	0	532	812	694	2107
UPTAG0216	885	818	973	908	858	831	786	990	637	962	778	918	852	905	867	522	584	970	1049	1024
UPTAG0217	698	821	771	904	646	661	867	818	706	712	921	1110	935	664	846	642	916	1302	730	927
UPTAG0218	768	676	759	747	652	741	758	798	479	782	958	930	846	678	801	653	887	1192	779	1064
UPTAG0219	693	551	0	775	852	705	563	0	635	821	806	669	0	691	1106	705	441	0	689	947
UPTAG0220	0	0	2	0	0	0	0	0	0	0	2	0	0	1	1	0	0	2	0	0
UPTAG0221	0	0	0	0	0	0	0	0	0	0	0	0	0	0	0	1	0	0	0	0
UPTAG0222	368	880	905	873	812	448	869	1011	554	850	466	778	618	765	940	366	634	855	699	992
UPTAG0223	885	1047	900	688	803	723	1054	1004	436	879	905	770	752	775	871	506	647	890	791	994
UPTAG0224	709	309	714	737	643	747	194	716	505	649	722	291	610	552	610	404	141	743	611	553
UPTAG0225	822	855	776	699	712	684	877	888	379	739	844	788	683	753	792	537	681	889	705	880
UPTAG0226	761	359	836	512	725	750	385	861	392	858	700	395	699	585	816	655	323	816	614	981
UPTAG0227	767	794	854	622	703	736	827	902	429	627	874	873	647	861	752	644	626	911	770	634
UPTAG0228	700	921	848	813	759	688	1027	937	539	787	703	1118	839	808	823	639	872	1144	894	919
UPTAG0229	584	1021	862	985	819	461	1034	815	633	930	907	1283	911	844	961	566	995	1191	831	1180
UPTAG0230	731	620	0	801	549	738	704	0	642	587	774	803	0	737	778	520	714	0	704	879
UPTAG0231	616	816	952	669	672	645	835	1048	110	724	670	877	760	446	611	129	540	948	675	869
UPTAG0232	678	703	669	639	158	685	586	598	428	119	605	730	560	600	170	507	463	604	461	105
UPTAG0233	778	914	834	723	788	790	954	1061	372	847	771	865	690	571	598	533	742	973	604	725
UPTAG0234	839	592	1028	825	861	861	518	1029	533	972	725	557	675	674	816	561	426	899	742	1013
UPTAG0235	687	0	621	680	780	822	0	766	280	796	650	0	652	430	767	547	0	726	542	962
UPTAG0236	909	232	732	746	198	809	152	917	482	131	762	264	764	625	353	653	119	1047	709	187
UPTAG0237	495	795	816	622	495	298	893	907	308	515	390	870	772	581	605	134	703	954	621	546
UPTAG0238	953	0	1011	896	671	894	0	1072	558	747	820	0	775	964	813	619	0	971	859	873
UPTAG0239	648	1047	861	656	618	539	1107	790	396	675	660	1127	673	800	636	322	808	841	678	703
UPTAG0240	787	773	928	871	569	690	849	861	615	626	847	969	944	851	818	681	772	1111	773	817
UPTAG0241	713	0	771	1011	1295	654	0	823	721	1358	851	0	643	970	1482	684	0	990	864	1555
UPTAG0242	587	0	726	557	433	655	0	802	118	507	676	0	831	457	496	300	0	970	595	448
UPTAG0243	723	300	0	690	763	721	245	0	308	834	718	531	0	465	850	468	329	0	732	905
UPTAG0244	1	315	587	808	755	0	300	730	385	952	0	393	577	486	719	0	289	806	693	938
UPTAG0245	309	591	566	584	627	466	588	553	234	690	424	541	517	329	579	91	516	611	551	784
UPTAG0246	677	491	543	728	0	897	496	643	305	0	815	509	701	311	0	522	468	687	644	0
UPTAG0247	814	543	930	609	0	714	517	970	226	0	634	513	900	502	0	317	402	1062	643	0
UPTAG0248	476	677	732	633	0	283	733	865	391	0	426	711	643	766	0	154	586	949	836	1
UPTAG0249	717	820	730	1011	1	775	839	847	495	0	674	892	685	835	0	461	706	819	902	1
UPTAG0250	427	727	765	494	0	300	700	842	292	0	345	827	632	609	0	152	599	828	679	0
UPTAG0251	340	0	0	528	0	208	0	0	364	0	292	0	0	649	0	111	0	0	622	0
UPTAG0252	709	412	558	804	0	696	367	729	438	0	838	532	705	685	0	556	333	997	743	0
UPTAG0253	1363	876	645	1004	0	1295	929	856	590	0	1296	981	864	798	0	1060	731	1171	891	0
UPTAG0254	448	366	534	801	0	349	319	544	301	0	462	394	627	369	0	192	331	757	664	0
UPTAG0255	717	539	453	760	0	795	575	562	425	0	730	465	481	755	0	479	521	595	747	0
UPTAG0256	641	784	749	655	0	600	848	924	470	0	546	749	635	706	0	355	591	792	707	0
UPTAG0257	697	728	664	714	0	669	741	720	436	0	587	651	589	483	0	454	621	780	599	0
UPTAG0258	737	384	655	372	0	716	223	755	172	0	660	428	650	351	0	342	168	840	313	0
UPTAG0259	584	598	521	612	0	693	572	589	277	0	653	615	692	275	0	536	460	598	515	0
UPTAG0260	897	688	452	609	0	860	720	473	327	0	863	709	488	747	0	811	591	455	972	0
UPTAG0261	610	681	730	699	0	561	627	825	305	0	518	683	640	600	0	364	609	849	855	0
UPTAG0262	609	430	694	606	0	799	455	814	267	0	808	577	668	598	0	520	441	795	769	0
UPTAG0263	449	0	457	816	0	594	0	541	259	0	628	0	621	420	0	364	0	688	889	0
UPTAG0264	637	2	572	791	0	668	0	665	268	0	732	0	847	513	0	492	0	903	896	0
UPTAG0265	757	799	377	1430	0	818	863	412	489	0	748	771	707	644	0	663	596	749	1092	0
UPTAG0266	742	422	566	0	0	789	469	729	0	0	716	559	863	0	0	225	504	1062	0	0
UPTAG0267	1	584	0	641	0	0	598	0	189	0	0	765	0	456	0	0	534	0	599	0
UPTAG0268	501	791	353	647	0	709	778	258	240	0	728	655	404	337	0	462	561	257	554	0
UPTAG0269	728	676	462	618	0	725	650	637	221	0	646	726	563	477	0	407	597	771	703	0
UPTAG0270	1	802	544	736	0	0	825	765	269	0	0	1101	602	476	0	0	846	683	700	0
UPTAG0271	886	735	554	700	0	873	870	657	246	0	880	751	670	415	0	756	689	693	715	0
UPTAG0272	329	644	485	628	0	482	515	509	175	0	462	677	647	315	0	250	469	660	692	0
UPTAG0273	814	2046	692	701	0	744	1949	824	428	0	704	2210	617	672	0	362	1496	922	816	0
UPTAG0274	478	589	431	639	0	529	691	513	232	0	548	752	535	310	0	329	618	564	678	0
UPTAG0275	541	0	624	687	0	597	0	645	258	0	774	0	862	302	0	575	0	902	583	0
UPTAG0276	437	948	638	842	0	600	931	621	283	0	714	1067	810	464	0	428	947	872	842	0
UPTAG0277	593	1072	521	2011	1	754	1067	509	791	0	792	1007	1002	1010	0	693	709	806	1796	0
UPTAG0278	0	472	503	662	0	0	326	554	184	0	0	449	614	248	0	0	241	692	510	0
UPTAG0279	0	1433	892	0	0	0	1466	947	0	0	0	979	745	0	0	2	875	908	0	0
UPTAG0280	491	1241	800	860	0	535	1318	918	493	0	568	1000	614	920	0	430	778	882	822	0
UPTAG0281	450	570	433	597	0	407	533	430	197	0	525	556	380	525	0	215	454	442	575	0
UPTAG0282	633	0	413	890	0	659	2	491	596	1	801	0	503	884	0	663	0	593	971	0
UPTAG0283	757	1001	568	689	0	794	1051	680	548	0	971	1197	616	803	0	706	939	922	739	0
UPTAG0284	648	951	732	698	0	667	899	740	522	0	947	956	699	879	0	594	767	882	870	0
UPTAG0285	799	1199	1422	857	0	790	1263	1653	446	0	1057	1243	1700	661	0	618	1043	2015	733	1
UPTAG0286	704	0	1527	724	0	705	0	1701	514	0	868	0	1328	716	0	514	0	1665	853	0
UPTAG0287	647	614	554	1008	0	578	684	499	459	0	754	827	460	722	0	581	612	485	839	0
UPTAG0288	739	958	446	0	0	719	1142	476	0	0	960	1213	522	0	0	696	1062	573	0	0
UPTAG0289	684	706	372	694	0	605	830	279	283	0	699	688	495	748	0	455	559	417	798	0
UPTAG0290	730	791	452	625	294	636	955	368	596	192	838	878	433	693	459	602	893	350	905	292
UPTAG0291	709	820	389	617	748	630	778	326	406	809	948	1172	386	700	891	846	914	349	763	1005
UPTAG0292	483	609	296	629	597	337	577	307	323	549	737	637	328	410	637	316	570	288	524	650
UPTAG0293	804	811	828	508	659	824	820	935	247	783	944	851	750	557	923	707	673	951	554	1019
UPTAG0294	769	925	605	721	669	732	904	638	452	789	926	926	543	671	884	667	682	724	653	1082
UPTAG0295	682	339	599	477	473	633	169	653	220	465	718	281	673	532	633	476	185	864	504	628
UPTAG0296	874	936	739	726	742	891	992	840	389	716	1016	802	720	605	1005	449	583	878	526	959
UPTAG0297	887	1120	850	691	672	976	1191	983	565	646	975	974	641	773	902	654	747	999	792	830
UPTAG0298	366	255	469	444	362	319	214	499	100	393	308	179	316	331	322	132	113	444	434	483
UPTAG0299	911	448	749	728	295	830	448	689	518	172	880	523	596	795	235	471	321	746	836	121
UPTAG0300	1394	627	869	694	1318	1279	516	1083	433	1322	987	671	756	937	1192	729	348	1133	1001	1281
UPTAG0301	773	366	0	868	269	768	297	0	656	180	1043	614	0	801	382	854	291	0	797	192
UPTAG0302	847	840	590	898	720	805	875	703	460	825	869	994	714	656	884	666	821	822	708	1066
UPTAG0303	778	691	703	740	696	798	709	792	351	850	821	905	599	571	796	562	702	819	498	1002
UPTAG0304	949	991	0	835	678	844	1009	0	501	667	865	981	0	745	703	486	848	0	760	839
UPTAG0305	673	489	447	566	673	667	523	565	218	713	667	538	603	371	750	483	385	722	660	829
UPTAG0306	777	905	655	585	967	709	930	757	259	1013	801	883	647	493	936	563	692	730	692	996
UPTAG0307	793	919	581	716	698	685	925	825	369	846	928	713	688	605	831	593	580	838	657	993
UPTAG0308	647	813	574	500	677	619	820	700	253	700	632	726	661	485	700	466	633	677	680	796
UPTAG0309	579	828	560	544	677	771	864	604	202	702	827	884	652	337	716	610	676	753	648	836
UPTAG0310	534	814	675	555	832	605	871	742	173	804	625	918	643	539	851	550	685	937	622	912
UPTAG0311	646	207	665	836	555	561	199	772	362	506	726	676	724	663	529	610	386	837	841	510
UPTAG0312	755	834	594	0	666	723	882	674	0	722	826	926	739	0	788	672	707	954	0	805
UPTAG0313	492	280	0	807	620	671	173	0	179	654	778	777	0	390	689	203	313	0	778	905
UPTAG0314	678	0	0	633	875	697	0	0	288	924	786	0	0	428	846	532	0	0	644	960
UPTAG0315	613	1151	0	762	0	639	1203	0	416	0	586	1080	1	570	0	540	909	0	627	0
UPTAG0316	885	868	0	830	800	796	944	0	403	812	795	853	0	662	786	371	718	2	632	910
UPTAG0317	769	889	0	920	883	739	978	0	456	934	876	811	0	627	848	654	677	1	669	954
UPTAG0318	792	902	0	697	876	723	912	0	433	971	791	849	0	577	933	447	637	1	642	994
UPTAG0319	586	1037	0	586	1125	535	1096	0	371	1093	608	864	0	580	972	240	690	0	642	897
UPTAG0320	641	1213	0	712	728	514	1217	0	501	764	685	875	0	691	778	418	815	0	650	916
UPTAG0321	670	973	0	748	759	742	990	0	417	806	822	856	0	709	938	556	704	0	787	1022
UPTAG0322	446	1007	0	587	770	370	1003	0	383	831	466	949	0	688	866	285	749	0	735	993
UPTAG0323	280	0	0	688	772	238	0	0	256	766	394	0	0	402	722	292	0	0	773	828
UPTAG0324	0	645	0	391	533	0	713	0	233	598	0	720	0	329	524	0	588	0	731	596
UPTAG0325	725	640	0	690	421	659	644	0	552	534	675	839	0	723	496	401	609	0	650	596
UPTAG0326	941	724	0	665	752	820	779	0	471	766	932	812	0	688	811	628	580	0	734	835
UPTAG0327	384	763	0	735	685	313	734	0	508	859	420	810	0	623	823	277	569	0	661	885
UPTAG0328	843	607	0	838	1067	901	555	0	443	1110	734	558	0	643	1164	489	312	0	637	1219
UPTAG0329	798	1258	0	839	977	746	1267	0	501	950	778	968	0	712	1116	501	713	0	614	1185
UPTAG0330	623	0	0	656	756	651	0	0	406	754	632	0	0	576	662	222	0	0	569	793
UPTAG0331	1	704	0	942	877	0	687	0	513	904	0	791	0	760	868	0	540	0	694	935
UPTAG0332	1	786	0	655	827	1	824	0	482	883	0	837	0	746	800	0	682	0	726	1011
UPTAG0333	0	0	0	453	629	0	0	0	193	520	0	0	0	534	628	0	0	0	332	491
UPTAG0334	999	768	0	662	722	905	832	0	560	740	877	832	0	842	820	468	623	0	879	900
UPTAG0335	257	0	0	533	576	154	0	0	180	611	330	0	0	474	614	30	0	0	555	799
UPTAG0336	2	1033	0	835	822	0	923	0	458	867	0	1132	0	768	1086	1	886	0	683	1199
UPTAG0337	598	769	0	808	420	412	880	0	389	391	661	892	0	830	594	373	692	0	861	648
UPTAG0338	341	679	0	626	688	250	709	0	436	776	390	707	0	703	841	185	587	0	715	905
UPTAG0339	9	15	0	13	10	24	7	0	2	8	11	14	0	7	3	0	4	0	19	11
UPTAG0340	1066	986	0	828	892	941	979	0	543	883	862	922	0	743	869	529	670	0	656	988
UPTAG0341	581	514	0	499	584	670	532	0	248	683	512	548	0	466	546	72	402	0	442	740
UPTAG0342	756	672	0	600	729	718	681	0	392	830	645	645	0	596	745	333	572	0	549	965
UPTAG0343	732	686	0	596	940	710	717	1	284	1046	627	733	0	513	893	325	605	0	589	1022
UPTAG0344	811	686	0	616	640	842	741	0	465	812	800	736	0	661	773	579	587	0	652	1023
UPTAG0345	1028	722	0	559	691	861	752	1	402	848	939	787	0	618	802	484	619	2	601	994
UPTAG0346	1077	711	0	648	767	974	764	0	353	866	961	778	0	784	771	581	686	0	781	1125
UPTAG0347	801	830	0	787	767	901	785	0	479	769	994	949	0	752	1061	597	850	0	774	1279
UPTAG0349	833	696	1	0	0	790	759	0	0	0	824	750	0	0	0	541	693	0	0	0
UPTAG0350	945	787	0	720	1550	811	718	0	484	1715	876	806	0	701	1619	485	550	0	724	2018
UPTAG0351	779	746	0	587	0	691	712	0	441	0	621	770	0	618	0	346	615	0	580	0
UPTAG0352	733	696	0	543	0	761	743	0	200	0	678	748	1	334	0	492	666	0	470	0
UPTAG0353	901	784	0	675	0	895	842	0	335	0	755	790	1	592	0	452	742	0	677	0
UPTAG0354	900	1	1	727	825	858	0	0	424	958	865	0	0	579	919	590	0	0	635	1047
UPTAG0355	1189	478	0	702	822	1105	493	0	361	846	967	545	0	695	879	631	391	0	671	1002
UPTAG0356	758	0	2	370	696	769	0	0	150	730	793	0	1	375	743	526	0	0	294	878
UPTAG0357	1010	670	0	632	516	982	724	0	165	409	926	810	0	522	535	557	668	0	705	431
UPTAG0358	800	803	0	636	849	838	799	0	370	899	795	773	0	703	982	525	735	0	772	991
UPTAG0359	706	760	0	932	768	656	825	0	476	816	816	968	0	832	963	471	799	0	862	1167
UPTAG0360	832	891	1	920	762	813	1056	0	638	885	1037	1183	0	1039	959	859	983	0	1056	1153
UPTAG0361	0	316	0	228	0	0	327	0	64	0	0	307	1	186	0	0	165	0	235	0
UPTAG0362	906	927	0	1012	2497	897	1044	0	603	2703	1025	1030	0	870	2481	709	822	0	831	2717
UPTAG0363	547	842	0	615	405	536	847	0	309	326	471	799	0	470	546	334	628	0	508	356
UPTAG0364	913	924	0	644	724	851	1004	0	358	798	761	917	0	624	895	291	687	0	684	937
UPTAG0365	697	483	0	595	589	721	342	0	315	802	742	488	0	653	786	453	220	0	630	984
UPTAG0366	781	642	0	645	702	559	498	0	355	670	743	746	0	724	860	430	419	1	533	840
UPTAG0367	885	955	0	678	929	949	969	0	342	938	769	984	0	350	865	686	860	0	373	1100
UPTAG0368	696	828	0	673	872	625	807	0	523	1062	597	914	0	659	954	493	756	0	665	1059
UPTAG0369	767	0	0	855	1068	750	0	0	507	1148	713	0	0	838	1161	616	0	0	826	1216
UPTAG0370	628	0	0	723	788	678	0	0	171	832	677	1	0	517	731	293	0	0	749	865
UPTAG0371	700	858	0	881	997	567	909	0	592	1108	911	1063	0	884	999	683	907	0	991	1117
UPTAG0372	829	0	1	746	800	803	0	0	351	791	940	0	0	735	1032	604	0	0	687	1155
UPTAG0373	720	804	0	0	2171	736	833	0	0	2094	656	733	0	0	1938	565	644	0	0	2209
UPTAG0374	993	875	0	1569	5375	805	880	0	946	5362	929	740	2	1401	4530	404	628	0	1456	5147
UPTAG0375	631	427	0	957	2976	676	412	0	511	3235	898	569	0	811	3913	530	272	0	762	4025
UPTAG0376	1050	510	0	1027	771	978	453	0	469	786	1183	705	0	702	1056	809	399	0	851	941
UPTAG0377	875	449	1	864	291	833	422	0	487	263	869	653	1	688	336	685	440	0	897	245
UPTAG0378	925	359	0	730	828	762	287	0	372	830	875	518	0	689	1088	440	190	0	776	1074
UPTAG0379	679	936	0	828	1075	751	833	0	510	1231	943	940	2	896	1291	721	631	0	1004	1353
UPTAG0380	684	560	0	897	737	602	530	0	617	817	855	808	0	885	867	622	520	0	844	799
UPTAG0381	875	21	0	1154	1514	917	7	0	529	1670	1164	322	0	996	1093	773	151	1	1019	1273
UPTAG0382	592	756	0	895	1715	495	604	0	482	1865	621	830	0	778	2262	193	480	0	717	2437
UPTAG0383	1076	415	0	1677	539	925	336	0	1230	532	1166	486	0	1663	649	807	265	0	1514	585
UPTAG0384	710	0	0	963	920	672	0	0	691	902	718	1	0	1018	1093	533	0	0	1061	1097
UPTAG0385	773	600	373	549	0	424	407	459	359	0	1263	473	556	984	0	580	239	767	998	0
UPTAG0386	845	785	666	784	931	861	849	593	554	1034	996	960	627	1462	1195	606	822	859	1195	1347
UPTAG0387	0	877	594	990	1059	0	1011	586	670	998	0	1052	526	920	1129	1	809	768	840	1029
UPTAG0388	463	250	556	414	389	518	267	617	230	514	499	303	508	574	555	91	153	912	454	553
UPTAG0389	483	948	387	550	382	485	1094	478	283	497	580	939	497	478	571	427	844	634	512	613
UPTAG0390	658	754	585	740	712	701	802	669	486	765	909	912	657	746	990	498	689	1030	809	1297
UPTAG0392	976	798	636	804	794	865	889	704	488	860	1113	822	670	796	994	727	661	745	1054	1092
UPTAG0393	1	0	1078	1435	820	0	0	886	1066	797	0	0	769	1062	924	0	0	1070	924	956
UPTAG0394	0	844	0	894	900	0	981	0	537	871	1	863	0	693	841	0	660	0	692	1151
UPTAG0395	362	563	325	316	347	437	501	396	72	506	406	420	251	269	372	36	269	304	444	504
UPTAG0397	779	597	582	621	907	782	541	553	359	993	982	779	779	784	988	625	525	765	834	1189
UPTAG0398	837	826	940	657	787	759	892	972	416	943	954	1003	802	795	996	624	786	1026	777	1235
UPTAG0399	787	876	638	969	779	756	1024	631	512	766	1103	1150	635	760	886	728	861	666	824	1026
UPTAG0400	671	694	655	797	718	672	668	657	511	817	907	689	476	679	898	725	616	609	682	1085
UPTAG0401	708	753	727	727	725	715	828	688	495	700	827	825	517	669	859	649	605	643	693	965
UPTAG0402	658	818	808	644	852	630	757	858	387	858	797	752	672	695	884	491	553	950	671	1107
UPTAG0403	483	0	562	541	641	701	0	500	238	611	669	0	552	353	642	520	0	430	705	640
UPTAG0404	675	731	311	371	0	629	654	348	110	1	716	598	80	367	0	433	378	85	307	0
UPTAG0405	888	344	876	718	702	834	292	943	408	707	968	377	742	715	883	658	188	955	760	1028
UPTAG0406	714	772	686	731	720	646	913	648	448	804	905	784	509	823	881	554	643	590	713	1042
UPTAG0407	713	615	0	797	876	662	631	0	457	897	643	693	0	773	929	448	479	0	626	980
UPTAG0408	920	1	1	863	600	879	0	0	876	556	792	0	0	1631	619	539	0	0	1648	699
UPTAG0409	515	571	626	751	799	587	603	538	680	878	662	704	569	664	744	406	687	692	642	942
UPTAG0410	638	0	581	671	904	653	0	567	327	892	684	0	588	681	877	598	0	618	789	905
UPTAG0411	742	864	849	803	705	754	870	908	656	804	829	990	637	863	828	572	746	923	755	962
UPTAG0412	788	955	812	740	634	595	962	686	623	711	700	833	522	618	822	372	645	700	628	837
UPTAG0413	865	897	661	0	868	768	890	736	1	974	858	796	471	0	829	555	645	534	0	1093
UPTAG0414	744	702	434	602	687	684	697	317	232	815	840	618	256	484	700	158	454	249	683	943
UPTAG0415	999	987	979	646	54	865	976	1058	424	24	949	944	733	686	3	646	673	949	731	1
UPTAG0416	782	873	897	711	790	814	951	887	375	902	785	797	642	634	797	503	653	797	700	1040
UPTAG0417	690	763	712	684	744	647	783	815	215	748	698	680	610	767	763	197	567	878	774	920
UPTAG0418	706	556	721	533	647	702	565	625	400	605	728	560	512	744	584	435	464	536	744	701
UPTAG0419	1	705	635	441	715	0	806	548	253	775	0	880	465	572	750	0	661	561	621	918
UPTAG0420	616	938	1424	927	974	473	1026	1416	534	914	728	1131	1478	1213	979	368	865	2062	982	1038
UPTAG0421	595	0	714	788	566	618	0	675	213	625	789	0	717	675	711	205	0	779	722	864
UPTAG0422	281	650	669	898	630	208	659	672	657	664	293	831	606	803	735	108	693	722	735	822
UPTAG0423	706	908	645	653	710	684	1012	727	576	859	697	968	543	595	765	431	760	701	627	1048
UPTAG0424	768	721	773	661	0	775	823	728	458	0	750	782	484	608	0	483	684	559	606	0
UPTAG0425	654	0	807	689	1018	652	0	951	315	1033	649	0	427	548	806	222	0	678	685	949
UPTAG0426	790	708	663	683	756	759	723	869	342	874	740	771	498	576	728	245	584	773	655	850
UPTAG0427	735	172	0	658	859	780	105	0	469	1002	719	342	0	673	877	341	129	0	666	969
UPTAG0428	595	0	884	462	663	543	0	973	276	601	604	0	710	449	541	344	0	966	423	757
UPTAG0429	702	671	614	0	576	636	616	553	0	625	546	665	433	0	605	225	443	545	0	725
UPTAG0430	640	0	886	525	570	605	0	934	320	661	559	0	611	508	601	266	0	817	648	863
UPTAG0431	352	532	361	310	378	338	465	495	156	473	377	549	289	363	371	29	317	500	352	538
UPTAG0432	538	0	551	595	291	412	0	598	340	260	514	0	508	554	331	175	0	863	682	359
UPTAG0433	387	1101	564	700	792	206	1311	670	431	855	414	1615	525	648	741	146	1413	800	805	854
UPTAG0434	645	0	614	593	729	510	0	561	352	815	611	0	465	687	821	436	0	378	632	923
UPTAG0435	962	521	683	817	762	823	592	721	647	808	773	637	623	897	789	592	489	903	776	888
UPTAG0436	678	786	886	679	785	620	755	923	484	844	744	890	689	598	813	492	654	963	514	980
UPTAG0437	785	769	1121	878	1000	745	798	1012	589	1129	763	814	603	856	982	465	605	749	705	1204
UPTAG0439	999	769	1117	584	861	950	828	1159	319	919	897	769	835	739	916	474	616	1161	528	1064
UPTAG0440	682	723	832	674	937	622	748	866	444	680	685	724	650	792	746	397	561	1021	701	625
UPTAG0441	480	997	728	520	724	314	911	762	394	724	383	934	586	708	802	179	655	735	640	872
UPTAG0442	3	815	756	0	738	0	799	909	0	856	0	970	784	0	880	1	703	1001	0	953
UPTAG0443	763	0	1358	498	858	757	0	1392	364	855	823	0	1631	676	908	644	0	2060	727	959
UPTAG0444	2	774	1100	585	773	0	846	847	429	883	0	990	977	753	906	1	789	1169	658	1053
UPTAG0445	710	1726	1161	618	1183	665	1870	1017	437	1274	770	2620	1652	634	1157	542	1998	2056	617	1229
UPTAG0446	1033	384	725	707	742	885	271	844	389	790	863	635	661	733	904	661	308	826	741	1043
UPTAG0447	647	448	807	567	686	642	403	883	318	792	674	484	755	710	757	400	328	812	641	766
UPTAG0448	671	531	716	560	0	488	396	726	456	0	642	523	538	1045	0	330	345	639	1123	0
UPTAG0449	704	0	0	163	0	656	0	0	106	0	657	0	0	59	0	418	0	0	49	0
UPTAG0450	850	0	780	794	466	780	0	915	447	320	743	0	704	653	601	585	0	953	757	410
UPTAG0451	874	460	929	465	1181	819	416	999	400	1180	757	654	820	669	1077	521	530	1092	624	1131
UPTAG0452	950	432	1195	597	855	941	483	1096	347	946	1029	658	893	669	949	738	583	1177	675	1094
UPTAG0453	1210	689	693	573	1	1085	745	837	322	0	1074	770	557	600	0	810	656	756	636	0
UPTAG0454	827	814	759	529	713	849	841	832	237	757	727	846	717	557	770	626	665	810	715	910
UPTAG0455	811	702	583	591	0	772	705	588	369	0	895	918	550	704	0	678	751	648	754	0
UPTAG0456	746	826	913	801	890	736	894	953	644	914	960	1139	829	771	1207	759	993	1177	776	1396
UPTAG0457	578	1009	663	422	627	557	1123	644	489	673	615	809	704	665	936	485	853	599	674	806
UPTAG0458	705	771	393	967	754	680	937	274	748	878	791	959	318	944	884	419	828	234	963	1063
UPTAG0459	612	748	520	369	784	415	807	596	162	787	672	685	520	336	757	295	675	612	400	794
UPTAG0460	877	0	2283	804	846	876	0	2237	527	938	967	0	1535	829	879	645	0	2334	775	995
UPTAG0461	641	739	875	754	906	653	721	839	646	935	581	792	402	663	823	344	547	947	676	998
UPTAG0462	818	577	808	674	596	742	523	838	404	596	798	546	616	665	770	599	416	799	806	777
UPTAG0463	978	324	865	620	786	895	249	828	427	796	796	467	763	617	892	575	263	763	602	1000
UPTAG0464	975	779	1284	741	852	887	968	1403	396	1037	940	932	1178	800	968	659	818	1822	824	1235
UPTAG0465	828	151	0	615	935	772	189	0	265	1014	941	302	0	639	1241	673	272	0	677	1325
UPTAG0466	943	840	848	731	0	949	822	862	528	0	959	843	586	864	0	722	680	889	786	0
UPTAG0467	931	681	543	555	0	779	742	558	209	0	943	850	563	438	0	649	739	648	349	0
UPTAG0468	712	790	1144	787	694	716	928	1192	278	807	884	1102	1226	799	906	429	912	1472	781	1052
UPTAG0469	874	1769	2325	1203	1031	856	1827	2393	760	1046	905	1721	2544	1173	954	648	1341	3547	1038	1054
UPTAG0470	808	408	0	859	977	912	381	0	538	966	836	854	0	752	982	623	544	0	671	1133
UPTAG0471	740	755	1025	921	1169	693	815	1134	515	1167	859	856	795	753	1116	615	643	1069	822	1254
UPTAG0472	734	902	0	588	1458	686	963	0	492	1484	947	951	0	767	1898	759	766	0	696	1947
UPTAG0473	487	513	826	692	0	480	478	777	583	0	853	595	533	799	0	501	420	883	775	0
UPTAG0474	526	748	578	764	0	529	738	543	461	0	602	707	446	993	0	450	604	590	919	0
UPTAG0475	752	816	2180	611	0	767	879	2210	329	0	880	828	2093	614	0	591	618	2617	664	0
UPTAG0476	747	1106	752	1566	0	621	1004	661	983	0	822	1310	322	1527	0	580	861	331	1451	0
UPTAG0478	0	569	0	748	0	0	581	0	377	0	0	716	0	643	0	0	476	0	811	0
UPTAG0479	125	0	534	884	0	73	0	486	438	0	2	0	538	893	0	0	0	622	915	0
UPTAG0480	354	0	0	648	0	245	1	0	301	0	484	0	0	667	0	168	0	0	518	0
UPTAG0481	405	582	744	623	1138	287	496	873	339	1331	606	745	985	1159	1072	249	463	1442	1189	1380
UPTAG0482	248	819	777	788	873	108	846	798	495	922	363	964	857	975	906	50	769	1048	888	996
UPTAG0483	372	1022	643	875	801	277	997	671	561	923	409	994	734	928	1126	112	808	967	887	1190
UPTAG0484	414	783	702	938	623	249	812	818	668	718	453	842	623	1010	796	185	724	828	858	1191
UPTAG0485	887	822	613	778	618	811	751	701	387	625	1134	944	715	801	807	803	741	941	702	871
UPTAG0486	410	781	1051	869	716	271	850	1052	522	842	485	917	869	874	929	192	805	1125	772	1125
UPTAG0487	719	950	767	719	701	413	926	844	459	707	949	805	756	788	1036	501	711	1013	881	1191
UPTAG0488	889	1018	442	1093	486	775	1024	355	460	494	1044	962	273	1422	553	546	738	289	1259	541
UPTAG0489	822	777	819	922	531	847	720	820	625	499	852	640	673	870	600	787	460	936	967	577
UPTAG0490	416	775	809	935	783	312	901	849	666	809	406	774	669	1709	782	139	635	907	1521	944
UPTAG0491	646	1053	457	769	690	617	1082	455	497	554	512	942	43	845	657	380	739	52	898	557
UPTAG0493	638	1241	566	333	614	547	1466	516	319	581	806	1080	752	524	835	436	1416	674	655	633
UPTAG0494	685	891	987	853	872	599	1052	1001	555	944	919	995	653	803	942	509	956	915	876	1050
UPTAG0495	427	759	2	808	736	353	782	0	435	866	552	994	0	706	952	347	783	0	707	990
UPTAG0496	786	780	714	772	678	738	798	842	447	761	1013	778	599	616	881	816	697	828	673	922
UPTAG0497	902	951	801	664	713	851	1030	973	369	784	967	904	704	719	900	699	804	983	664	1089
UPTAG0498	809	935	762	635	732	789	992	847	373	887	819	869	724	762	972	689	803	1007	795	1077
UPTAG0499	739	783	699	713	0	778	797	811	466	0	793	715	697	578	0	698	571	834	710	0
UPTAG0500	789	891	1	644	811	733	988	0	368	890	878	754	0	646	973	640	656	0	663	1036
UPTAG0501	1	810	787	555	542	0	729	811	350	474	0	517	581	660	582	0	354	779	519	557
UPTAG0502	753	678	881	889	0	746	746	953	651	0	777	674	689	776	0	630	650	813	733	0
UPTAG0503	0	3	0	0	1	0	2	0	0	0	0	1	0	0	0	0	1	0	1	0
UPTAG0504	628	740	1011	621	1151	454	698	1124	340	1114	508	873	899	357	965	261	679	1090	334	1089
UPTAG0505	691	469	0	715	703	639	568	0	373	732	922	676	0	786	882	397	612	0	889	945
UPTAG0506	655	773	925	869	837	630	737	959	546	846	610	878	701	774	864	364	772	914	747	1055
UPTAG0507	0	774	594	935	1057	0	815	409	624	1154	0	834	374	862	975	0	703	282	865	1072
UPTAG0508	951	995	803	887	783	865	773	900	455	787	909	1112	574	716	867	567	729	871	715	1024
UPTAG0509	636	897	838	623	774	466	910	939	305	797	712	878	589	635	918	320	656	841	669	1117
UPTAG0510	541	778	879	546	1505	518	855	765	381	1634	529	800	505	680	1717	234	625	475	643	1635
UPTAG0511	722	892	1009	729	1015	751	935	984	534	966	745	832	529	702	930	507	692	763	743	860
UPTAG0512	0	794	0	577	958	0	903	0	302	892	0	704	0	542	1021	0	540	0	504	1104
UPTAG0513	886	824	792	691	710	959	825	908	475	870	828	846	602	717	798	611	666	872	715	1035
UPTAG0514	633	757	731	535	833	593	808	663	459	901	613	843	508	656	827	380	671	618	699	821
UPTAG0515	533	764	705	934	858	473	889	750	595	916	574	872	580	753	833	290	766	973	848	978
UPTAG0516	819	933	846	859	821	732	893	939	644	834	845	1066	838	1038	839	477	842	1119	992	964
UPTAG0517	642	1166	820	770	500	717	1041	925	419	671	738	1001	736	738	786	566	646	1234	683	945
UPTAG0518	835	683	758	913	780	725	807	811	487	814	874	871	677	861	780	500	651	842	764	764
UPTAG0519	910	983	777	854	912	854	995	876	553	992	861	1027	584	794	974	685	753	722	804	1202
UPTAG0520	936	825	925	627	812	853	842	995	336	841	837	919	603	530	764	555	693	798	447	864
UPTAG0521	690	726	533	730	680	706	646	492	331	721	672	844	397	615	767	496	561	348	624	854
UPTAG0522	857	821	976	846	849	890	840	1057	491	958	877	892	643	764	853	564	622	837	746	964
UPTAG0523	591	439	359	466	364	515	490	240	325	398	457	366	265	382	348	36	296	193	395	350
UPTAG0524	698	635	1011	483	753	758	571	931	339	892	686	637	732	531	741	627	410	996	613	1024
UPTAG0525	632	857	663	610	712	739	838	820	280	734	669	783	714	550	759	500	632	865	687	848
UPTAG0526	0	527	683	771	829	0	500	786	236	902	0	757	652	707	889	0	504	874	755	923
UPTAG0527	3	720	794	734	802	0	834	758	478	777	0	891	694	785	798	1	784	833	855	889
UPTAG0528	0	1044	1482	1172	606	0	1115	1631	632	596	0	1152	1237	1241	603	1	928	1764	1126	697
UPTAG0529	843	1569	725	902	1001	822	1636	861	447	885	852	2042	787	848	964	561	1540	1156	831	1062
UPTAG0530	704	1039	676	519	769	717	1068	861	351	798	645	1140	592	641	804	340	883	939	656	902
UPTAG0531	754	676	794	711	768	794	699	822	425	890	778	668	670	747	811	477	530	925	701	1050
UPTAG0532	831	759	535	711	625	769	857	448	431	673	686	754	348	683	727	564	642	446	683	789
UPTAG0533	643	658	849	717	1000	545	627	812	587	1047	670	738	550	726	763	346	571	847	699	768
UPTAG0534	1	688	704	255	835	0	852	811	313	761	0	444	692	467	764	0	673	693	730	641
UPTAG0535	849	696	789	534	794	803	756	919	320	893	748	731	674	534	842	563	585	962	568	979
UPTAG0536	365	543	829	488	672	298	591	788	129	799	458	681	529	549	710	131	519	728	646	991
UPTAG0537	741	569	642	280	337	770	696	749	222	303	760	609	439	585	392	101	508	643	588	312
UPTAG0538	651	709	560	465	797	429	710	639	222	898	521	756	678	539	906	277	700	684	697	867
UPTAG0539	690	721	820	631	762	631	641	980	598	830	748	895	705	741	809	464	656	1073	837	1059
UPTAG0540	1219	546	970	1091	1176	1228	483	953	795	1190	1140	1155	665	1020	1841	974	833	1033	1130	2408
UPTAG0541	807	634	807	586	0	755	666	911	563	0	811	702	701	664	0	581	576	1170	688	0
UPTAG0542	5	673	581	598	570	0	692	655	281	454	0	649	624	536	623	0	507	747	684	485
UPTAG0543	741	830	523	487	832	715	874	445	603	965	695	791	356	659	976	539	678	386	670	1045
UPTAG0544	493	699	827	782	980	443	825	920	414	1011	622	737	701	731	923	440	635	906	806	1074
UPTAG0545	1	1143	853	773	995	0	1136	1035	611	1023	0	979	733	636	854	0	672	1097	647	1001
UPTAG0546	0	607	601	523	736	0	574	772	132	805	0	593	561	471	728	2	394	784	642	863
UPTAG0547	2	673	833	420	862	0	745	918	365	898	0	664	700	607	818	0	555	1084	684	967
UPTAG0548	2	748	625	613	865	0	753	802	306	853	0	765	659	585	937	0	595	856	712	887
UPTAG0549	1	0	0	488	707	0	0	0	370	770	0	0	0	504	1032	0	0	0	512	1080
UPTAG0550	0	0	548	257	391	0	0	598	158	494	0	0	409	338	392	0	0	543	367	494
UPTAG0551	2	491	741	1090	687	0	388	824	961	900	0	609	712	1007	1011	2	365	1055	889	1274
UPTAG0552	1	704	799	860	779	0	809	917	578	623	0	1170	1047	992	1000	1	1014	1358	980	944
UPTAG0553	2	852	811	1177	768	0	934	893	849	768	0	1047	725	992	692	0	809	992	877	707
UPTAG0554	0	831	580	624	619	0	868	660	415	637	0	768	592	639	657	1	693	842	751	734
UPTAG0555	2	604	29	659	669	0	666	16	479	706	0	644	472	600	838	0	462	501	644	866
UPTAG0556	0	1126	910	665	799	0	1078	1033	454	811	0	995	661	580	910	1	778	927	607	1136
UPTAG0557	2	179	1301	700	562	0	104	1520	329	540	0	320	1242	587	629	1	157	1561	660	622
UPTAG0558	3	842	870	652	1066	0	852	1073	333	1060	0	823	808	587	1077	0	653	1021	625	1138
UPTAG0559	1	736	827	629	0	0	734	776	422	0	0	732	644	689	0	1	604	789	620	0
UPTAG0560	5	621	778	804	0	0	673	674	621	0	0	691	588	1094	0	1	613	701	988	0
UPTAG0561	1	689	803	208	0	0	732	804	150	0	0	668	656	297	0	1	630	848	210	0
UPTAG0562	0	0	0	152	0	0	0	0	46	0	0	0	0	108	0	0	0	0	142	0
UPTAG0563	0	524	0	665	0	0	582	0	370	0	0	740	0	655	0	3	571	0	581	0
UPTAG0564	1	712	643	754	0	0	786	784	400	0	0	1118	932	815	0	0	943	1231	838	0
UPTAG0565	1	781	0	0	0	0	761	0	0	0	0	632	0	0	0	1	367	0	0	0
UPTAG0566	2	728	419	843	0	0	643	404	320	0	0	412	251	583	0	0	201	338	740	0
UPTAG0567	2	717	741	758	0	0	835	737	390	0	0	818	573	631	0	0	561	724	732	0
UPTAG0568	0	560	0	641	0	0	551	0	395	0	0	436	0	643	0	0	238	0	714	0
UPTAG0569	2	812	526	680	0	0	929	532	349	0	0	854	471	701	0	3	627	579	741	0
UPTAG0570	1	819	402	0	0	0	832	373	0	0	0	793	56	0	0	0	634	111	0	0
UPTAG0571	2	839	785	645	0	0	981	751	405	0	0	1022	611	874	0	0	829	834	826	0
UPTAG0572	1	0	821	763	0	0	0	776	415	0	0	0	613	659	0	0	0	732	687	0
UPTAG0573	2	1022	995	788	0	0	1127	923	610	0	0	929	800	743	0	0	835	928	761	0
UPTAG0574	1	552	621	867	0	0	511	662	595	0	0	715	169	808	0	1	443	243	800	0
UPTAG0575	3	698	1776	894	0	0	711	1582	498	0	0	862	1504	824	0	0	644	1745	701	0
UPTAG0576	2	370	543	0	0	0	337	661	0	0	0	595	1043	0	0	0	403	1081	0	0
UPTAG0577	903	401	0	724	1159	811	340	0	453	1450	932	394	0	1111	1182	638	257	0	872	1516
UPTAG0578	896	0	1	705	786	884	2	0	370	763	998	0	0	805	999	696	0	0	842	1092
UPTAG0579	706	651	676	816	597	723	798	785	667	537	882	961	585	1032	623	550	816	825	994	597
UPTAG0580	740	994	842	918	644	732	1082	808	579	773	948	1038	616	735	883	633	778	771	799	932
UPTAG0581	982	620	591	496	584	985	660	677	321	634	1160	645	596	497	812	885	485	737	567	820
UPTAG0582	813	519	650	457	682	785	439	745	272	753	934	595	658	803	902	764	355	893	583	1042
UPTAG0583	785	560	593	706	771	807	494	456	465	870	908	558	450	818	1034	621	298	348	792	1169
UPTAG0584	799	483	1118	672	699	813	370	1188	478	851	912	590	1273	797	1350	721	312	1882	831	1587
UPTAG0585	0	0	0	11	0	0	0	0	4	0	0	0	0	10	0	0	0	0	11	0
UPTAG0586	799	850	710	833	941	814	990	896	430	951	939	805	600	671	1086	675	737	861	743	1182
UPTAG0587	665	0	440	469	541	687	0	485	191	665	751	0	362	463	756	138	0	484	387	818
UPTAG0589	429	298	683	784	766	341	205	591	672	796	692	109	783	795	887	266	47	1021	750	933
UPTAG0590	623	708	0	786	646	526	708	0	632	773	745	941	1	819	862	427	681	0	751	967
UPTAG0591	879	1	0	1006	1014	789	0	0	587	1114	897	0	0	847	1019	680	0	0	844	1093
UPTAG0593	732	851	0	1044	757	715	899	0	560	805	828	662	0	804	869	598	595	0	745	1022
UPTAG0594	747	867	701	543	361	748	938	648	395	324	872	717	465	603	453	454	677	474	669	346
UPTAG0595	1	259	859	512	656	0	197	866	367	676	1	224	633	636	738	1	104	836	718	703
UPTAG0596	792	899	814	717	0	672	976	904	355	0	779	747	613	641	0	303	642	856	665	0
UPTAG0597	754	0	666	572	874	774	0	667	285	1004	777	0	483	526	823	366	0	628	523	970
UPTAG0598	612	0	814	312	850	321	0	776	123	946	426	0	521	407	1006	150	0	686	194	1030
UPTAG0599	1277	0	0	919	674	1130	0	0	703	710	1079	0	0	846	763	790	0	0	960	713
UPTAG0601	978	0	745	865	660	953	0	920	745	752	1092	0	876	716	940	730	0	1147	814	1032
UPTAG0602	886	1	724	638	602	785	0	706	379	757	969	0	597	640	776	505	0	686	560	782
UPTAG0603	921	0	251	828	388	1010	0	112	522	381	981	0	196	626	472	581	0	117	638	515
UPTAG0604	679	0	598	698	623	659	0	667	618	692	593	0	406	608	553	292	0	499	613	748
UPTAG0605	837	1	810	761	912	783	1	904	591	1046	860	0	622	731	824	521	1	811	713	1051
UPTAG0606	673	0	603	591	918	640	0	309	505	954	630	0	339	608	826	424	0	195	571	868
UPTAG0607	467	0	529	419	0	415	0	646	239	0	428	0	357	390	0	153	0	491	412	0
UPTAG0608	666	0	0	548	764	769	0	0	363	781	730	1	0	602	879	547	0	0	718	900
UPTAG0609	730	0	618	553	742	681	0	559	370	751	648	0	482	628	842	567	0	576	546	938
UPTAG0610	639	0	368	551	692	503	0	229	316	748	616	0	261	609	812	349	0	241	653	808
UPTAG0611	412	0	767	667	897	406	0	947	329	860	597	0	705	564	893	419	0	921	682	902
UPTAG0612	800	0	535	879	932	734	1	456	467	930	923	0	564	992	946	618	0	557	964	942
UPTAG0613	1120	0	450	1049	1132	1017	0	327	644	1047	1439	0	621	997	1299	710	0	584	898	1363
UPTAG0614	655	0	490	579	611	654	0	499	283	712	704	0	521	695	745	487	0	622	563	881
UPTAG0615	451	0	634	718	1012	322	0	701	373	1083	469	1	562	675	972	233	0	660	687	1029
UPTAG0616	797	0	232	801	0	802	0	162	463	0	801	0	169	770	0	552	0	134	735	0
UPTAG0617	828	0	714	723	1086	768	0	584	638	1040	671	0	554	596	1014	467	0	513	756	1011
UPTAG0618	695	0	562	740	789	750	0	507	342	886	700	0	381	656	789	682	0	393	575	931
UPTAG0619	825	1	760	609	900	762	0	943	329	1022	693	0	634	680	791	576	0	894	638	1097
UPTAG0620	709	0	921	629	717	695	0	933	269	739	691	0	621	595	645	257	0	788	604	883
UPTAG0621	833	0	644	486	758	841	0	579	237	781	775	0	540	669	817	517	0	568	595	983
UPTAG0622	844	0	715	536	684	816	1	808	360	784	802	0	553	660	759	466	0	916	716	946
UPTAG0623	801	0	288	489	879	799	1	274	401	900	805	0	23	678	862	463	0	11	735	1032
UPTAG0624	1	0	2	2	0	3	0	0	1	0	0	0	0	2	1	0	0	0	1	0
UPTAG0625	703	0	0	926	10	747	0	0	518	11	946	0	0	728	7	674	0	0	780	2
UPTAG0626	811	0	637	629	661	772	0	654	344	733	738	0	545	661	804	442	0	742	596	922
UPTAG0627	897	0	761	681	848	912	0	683	379	902	864	0	690	695	924	621	0	688	634	1057
UPTAG0628	929	0	921	747	786	948	0	851	557	876	943	0	612	620	820	492	0	820	683	1011
UPTAG0629	723	0	627	1028	900	800	0	694	469	959	687	0	585	672	905	360	0	725	801	1024
UPTAG0630	741	0	635	410	929	794	0	555	355	793	625	0	438	509	931	504	0	387	542	746
UPTAG0631	629	0	492	654	819	853	0	382	295	880	719	0	301	437	824	519	0	226	641	1049
UPTAG0632	808	0	577	518	800	824	0	724	297	728	758	0	556	691	726	575	0	680	799	657
UPTAG0633	848	0	699	557	784	834	0	655	365	830	705	0	487	680	831	599	0	547	684	975
UPTAG0634	577	0	217	245	393	570	0	258	99	481	532	0	237	329	454	80	0	213	365	527
UPTAG0635	825	0	127	570	642	745	0	65	509	616	1036	0	219	809	785	717	0	105	839	840
UPTAG0636	539	0	459	557	568	590	0	483	146	649	694	0	488	483	720	122	0	635	604	1010
UPTAG0637	720	1	1267	932	808	766	0	1210	553	903	842	0	854	905	996	500	0	1032	927	1237
UPTAG0638	710	0	229	631	976	724	0	198	451	1014	717	0	13	672	972	497	0	13	701	1115
UPTAG0639	1025	0	767	679	769	965	0	755	421	805	954	0	564	776	875	597	0	699	738	1013
UPTAG0640	867	0	0	831	0	779	0	0	472	0	656	0	0	655	0	614	0	0	513	0
UPTAG0641	680	0	1	666	916	559	0	0	422	1088	628	0	0	613	920	260	0	0	644	1075
UPTAG0642	763	0	43	517	354	764	0	38	413	195	682	0	2	628	328	575	0	4	715	160
UPTAG0643	780	0	787	619	818	839	1	792	338	931	677	0	642	644	884	329	0	735	706	1038
UPTAG0644	1126	0	835	530	949	1043	0	886	414	1021	865	0	665	630	906	655	0	888	722	947
UPTAG0645	875	0	696	517	0	802	1	727	293	0	758	0	569	541	0	664	0	658	544	0
UPTAG0646	766	0	631	613	649	793	0	699	388	792	752	0	526	662	871	659	0	688	728	1031
UPTAG0647	707	0	584	641	0	642	0	683	338	0	722	0	568	617	0	550	0	853	730	0
UPTAG0648	731	0	714	976	633	688	0	688	598	688	940	0	710	999	738	677	0	973	787	812
UPTAG0649	709	0	1043	899	1238	713	0	1057	549	1453	851	0	947	896	1616	588	0	1288	765	1947
UPTAG0650	767	0	703	897	614	845	1	820	567	525	915	0	716	747	259	719	0	929	788	163
UPTAG0651	956	0	817	604	739	922	0	925	474	835	1034	0	646	772	919	793	0	883	648	893
UPTAG0652	755	0	493	534	791	647	0	401	354	857	750	0	568	549	787	524	0	505	684	869
UPTAG0653	0	0	0	600	733	0	0	0	303	737	0	0	0	423	869	0	0	0	508	943
UPTAG0654	823	0	719	676	688	837	0	885	388	659	831	0	691	467	841	483	0	832	497	903
UPTAG0655	0	0	0	488	0	0	0	0	320	0	0	0	0	723	0	0	0	0	568	0
UPTAG0656	740	0	838	561	846	732	0	858	445	927	659	0	639	735	922	419	0	907	692	1089
UPTAG0657	943	0	894	0	920	831	0	926	0	1074	1001	0	748	0	1168	698	0	977	0	1167
UPTAG0658	757	0	552	703	0	837	0	414	485	0	792	0	433	694	0	505	0	411	660	0
UPTAG0659	791	0	921	722	0	784	0	1047	552	0	989	0	819	620	0	616	0	1394	616	0
UPTAG0660	538	0	912	835	719	489	0	969	522	813	747	0	859	933	926	402	0	1305	890	1158
UPTAG0661	0	0	566	0	1051	0	0	623	0	1004	0	0	678	0	908	0	0	901	0	907
UPTAG0662	481	0	571	742	0	511	0	631	277	0	550	0	582	629	0	532	0	634	800	0
UPTAG0663	661	0	1214	954	933	519	0	1009	861	1023	798	0	729	876	1163	567	0	757	889	1191
UPTAG0664	0	0	0	568	0	0	0	0	293	0	0	0	0	517	0	1	0	0	354	0
UPTAG0665	1	0	62	859	0	0	0	78	607	0	0	0	1	848	0	0	0	3	833	0
UPTAG0666	710	0	665	1137	0	832	0	676	787	0	805	0	538	1537	0	672	0	703	1516	0
UPTAG0667	797	0	682	1045	1	710	2	657	542	0	1080	0	600	920	0	853	0	713	953	0
UPTAG0668	709	0	692	875	1	724	0	719	573	0	933	0	545	935	0	708	0	675	874	0
UPTAG0669	812	0	785	1411	0	894	0	786	955	0	1058	0	608	1281	0	870	0	730	1071	0
UPTAG0670	897	0	1249	919	0	935	0	1384	495	0	1086	0	1445	786	0	864	0	1788	791	0
UPTAG0671	1665	0	0	1015	0	1658	1	0	624	0	2231	0	0	855	0	855	0	0	859	0
UPTAG0672	1460	0	1	912	0	1290	0	0	684	0	1445	0	0	799	0	877	0	0	822	0
UPTAG0673	734	0	735	0	887	782	0	518	0	825	699	0	659	0	822	623	0	648	0	965
UPTAG0674	805	0	709	836	690	771	0	755	634	742	950	0	700	1078	813	632	0	821	904	1064
UPTAG0675	735	0	730	593	760	677	0	733	435	781	880	0	571	789	945	500	0	717	696	1056
UPTAG0676	866	682	597	856	665	692	583	675	712	659	1139	676	580	742	801	659	497	788	814	896
UPTAG0677	842	619	889	543	755	738	741	857	435	838	960	652	686	718	898	634	469	952	665	1024
UPTAG0678	799	847	877	742	802	742	952	767	415	860	1071	909	640	725	896	727	808	1021	728	1152
UPTAG0679	971	614	851	818	753	966	595	992	337	824	1163	713	647	664	811	530	447	973	758	995
UPTAG0680	861	889	1015	645	384	858	900	965	498	295	864	783	723	716	233	538	602	1042	626	183
UPTAG0681	385	876	0	732	493	240	997	0	440	445	439	835	0	813	558	185	669	0	582	568
UPTAG0682	860	837	0	716	1532	776	913	0	551	1686	836	869	0	749	1814	629	772	0	632	1893
UPTAG0683	923	1	1211	796	645	858	0	1412	597	481	941	0	1245	985	689	609	0	1801	954	609
UPTAG0685	151	329	185	187	143	141	281	214	72	175	195	605	182	141	150	60	435	248	163	202
UPTAG0686	748	737	782	994	673	770	707	958	605	738	853	955	658	1034	840	487	716	980	815	933
UPTAG0687	821	769	668	733	1	819	840	875	491	0	931	1039	564	589	0	631	799	818	725	0
UPTAG0688	774	732	811	852	795	732	839	854	585	742	828	830	707	695	873	721	699	839	736	863
UPTAG0689	857	844	879	578	750	888	940	964	411	777	874	881	671	612	746	402	672	953	628	908
UPTAG0690	622	673	720	431	542	567	780	747	250	641	599	636	450	500	656	132	492	673	479	856
UPTAG0691	316	695	241	252	0	342	716	373	78	0	442	646	239	196	0	29	531	363	202	0
UPTAG0692	806	990	933	605	824	676	1076	884	467	864	743	802	600	727	1063	596	706	856	693	1079
UPTAG0693	866	975	0	941	674	840	1115	0	508	628	927	957	0	866	757	594	754	0	820	752
UPTAG0694	734	851	706	595	494	730	815	848	314	318	728	760	539	698	508	347	643	745	681	426
UPTAG0695	804	818	873	492	817	789	897	982	406	825	786	929	832	772	902	722	821	1081	837	942
UPTAG0696	1292	1053	1000	920	853	724	1108	1104	648	951	967	1160	911	1205	912	566	951	1298	1244	917
UPTAG0697	712	1198	827	646	697	734	1368	904	457	852	770	825	851	797	801	576	724	1223	854	1167
UPTAG0698	798	792	0	739	711	809	861	0	487	754	834	962	0	736	868	753	908	0	763	1041
UPTAG0699	479	665	698	0	838	472	703	765	0	850	482	766	570	0	882	335	605	839	0	930
UPTAG0700	746	958	1084	0	772	786	835	1093	1	844	747	841	671	0	869	571	760	872	1	937
UPTAG0701	792	1138	882	767	713	867	1158	995	481	781	751	1016	628	677	851	712	739	919	668	769
UPTAG0702	1033	770	1125	615	1549	939	764	1209	275	1614	1001	761	807	700	1782	434	552	947	718	1918
UPTAG0703	927	815	732	701	903	833	946	916	388	827	955	1415	630	720	899	633	1138	874	668	832
UPTAG0705	720	843	950	515	755	611	904	1044	380	754	687	858	765	680	808	373	644	1188	780	926
UPTAG0706	270	0	0	610	0	203	0	0	388	0	352	0	0	738	0	120	0	0	771	0
UPTAG0707	763	928	0	743	799	779	919	0	364	831	762	983	0	683	1031	608	847	0	709	1045
UPTAG0708	712	857	914	762	808	875	870	963	400	990	853	1085	822	806	737	562	937	1108	1080	1117
UPTAG0709	743	1448	0	650	632	757	1701	0	413	666	829	2220	0	658	806	553	1840	0	672	954
UPTAG0710	424	45	627	542	573	304	55	758	343	602	475	25	516	503	654	120	12	800	542	821
UPTAG0711	5	864	991	767	996	0	885	1033	463	1108	0	882	642	654	999	0	692	986	626	1294
UPTAG0712	335	847	939	734	963	168	915	1112	518	1073	310	887	620	528	884	53	781	951	651	989
UPTAG0713	4	852	875	760	747	0	885	956	670	887	0	784	606	635	780	0	582	973	641	916
UPTAG0714	346	434	417	281	364	398	492	408	133	403	317	410	203	242	339	59	307	377	205	363
UPTAG0715	891	0	1190	588	721	882	1	1205	418	637	823	0	891	665	681	572	0	1090	669	643
UPTAG0716	1120	909	985	653	850	1061	920	1079	494	915	975	868	771	721	933	768	721	1084	718	1067
UPTAG0717	585	1031	776	574	808	606	1059	770	585	845	496	992	597	774	887	337	747	799	726	936
UPTAG0718	587	844	872	651	729	667	903	913	350	790	615	761	737	571	848	396	746	1103	784	1039
UPTAG0719	423	773	0	627	722	268	931	0	347	783	512	1048	0	648	928	239	860	0	456	994
UPTAG0720	916	928	2470	894	732	899	1091	2542	807	731	939	1229	2787	967	347	713	1040	3629	1026	459
UPTAG0721	495	0	604	0	512	540	0	682	0	580	545	0	686	0	545	416	0	767	0	634
UPTAG0722	846	812	705	522	317	800	820	787	313	320	763	922	695	662	422	598	689	991	644	358
UPTAG0723	830	516	951	712	791	704	472	960	542	784	850	510	765	608	897	509	294	1002	604	1004
UPTAG0724	675	393	460	0	458	446	359	390	0	347	604	501	389	0	599	252	312	409	0	366
UPTAG0725	749	728	869	543	872	726	745	985	242	1011	685	818	670	441	971	572	593	929	263	1016
UPTAG0726	784	793	771	664	908	830	760	842	365	900	754	764	681	523	850	436	643	936	698	802
UPTAG0727	891	779	845	675	1084	884	865	1059	435	1145	790	777	671	689	1118	713	611	964	680	1100
UPTAG0728	926	731	1120	544	717	788	797	994	384	715	814	711	806	694	798	555	581	1031	676	810
UPTAG0729	902	828	662	583	385	860	826	786	367	338	860	1003	650	617	536	654	738	816	737	422
UPTAG0730	793	724	804	492	727	789	773	879	453	785	774	809	725	841	933	640	672	987	697	1042
UPTAG0731	882	768	761	870	738	847	843	866	567	886	1112	985	798	796	1110	806	798	961	765	1198
UPTAG0732	62	708	800	1266	1072	25	733	813	1030	1259	53	997	981	1218	1452	9	804	1187	1152	1650
UPTAG0733	788	708	870	772	921	756	646	966	476	1154	773	739	712	751	858	401	524	1087	766	1146
UPTAG0734	848	778	724	588	517	820	864	799	634	386	844	847	649	759	429	450	709	1017	796	449
UPTAG0735	596	1033	905	864	993	372	967	961	542	981	525	914	629	802	1025	204	735	874	732	1087
UPTAG0736	912	920	831	747	931	921	909	851	541	947	753	923	585	780	967	571	797	825	776	1001
UPTAG0737	926	834	874	686	910	833	850	844	514	988	751	783	546	728	1018	473	612	811	629	1089
UPTAG0738	803	717	904	589	783	761	837	795	426	951	765	697	607	573	780	375	566	784	553	959
UPTAG0739	870	805	1122	540	805	783	778	1063	462	908	812	867	826	629	903	501	720	1102	605	1014
UPTAG0740	731	700	738	451	585	722	719	843	274	648	718	712	596	592	665	242	599	839	567	635
UPTAG0741	740	652	675	0	663	744	647	682	1	653	666	652	523	0	521	512	543	644	0	527
UPTAG0742	600	610	452	0	752	541	719	403	0	792	746	687	426	0	903	466	574	598	0	946
UPTAG0743	653	681	661	0	712	670	729	685	1	742	795	833	728	0	845	626	752	853	0	1098
UPTAG0744	983	755	844	1031	1539	905	840	778	952	1527	1072	1156	812	856	1948	944	1098	1306	996	2005
UPTAG0745	830	952	1	938	690	795	991	0	802	625	843	1001	0	740	419	664	684	0	644	340
UPTAG0746	1708	647	754	1409	1347	1694	568	862	932	1428	1692	650	712	1441	1528	1636	452	935	1544	1610
UPTAG0748	783	779	493	649	1010	772	789	404	362	1129	713	783	339	683	1035	589	543	398	667	1185
UPTAG0749	0	0	17	6	47	0	0	14	2	64	0	0	4	1	36	0	0	11	1	55
UPTAG0750	379	557	218	587	840	591	559	200	237	865	577	610	279	327	781	490	499	246	761	941
UPTAG0751	929	721	655	461	0	883	748	481	284	0	846	849	460	484	0	638	611	496	394	0
UPTAG0752	874	609	951	544	0	814	568	818	329	0	708	562	733	634	0	529	504	743	567	0
UPTAG0753	756	484	587	594	0	691	571	733	312	0	729	680	661	512	0	451	472	714	745	1
UPTAG0754	792	0	515	754	0	789	0	518	615	0	778	0	379	783	0	581	0	581	709	0
UPTAG0755	662	900	961	771	0	642	958	965	585	0	860	982	916	827	0	617	851	1260	742	0
UPTAG0756	141	201	591	931	0	138	209	603	642	0	145	254	617	867	0	91	186	783	840	0
UPTAG0757	7	0	0	0	0	0	0	0	0	0	0	0	0	0	0	0	0	0	0	0
UPTAG0758	895	443	637	847	0	872	272	681	396	0	1026	503	925	686	0	646	217	886	717	0
UPTAG0759	999	506	0	868	0	976	490	0	359	0	1015	535	0	682	0	836	327	0	736	0
UPTAG0760	782	0	0	1042	0	705	0	0	713	0	894	0	0	903	0	433	0	0	909	0
UPTAG0761	1676	1462	2316	1349	201	1586	1431	2247	1216	201	1615	1608	2185	1486	215	1295	1048	2713	1411	213
UPTAG0762	813	998	719	980	0	724	898	796	493	0	886	979	747	909	0	663	822	924	866	0
UPTAG0763	752	816	774	989	0	729	818	890	493	0	973	855	550	869	0	751	637	996	821	0
UPTAG0764	821	567	601	615	0	683	661	617	309	0	1049	714	609	565	0	245	513	808	618	0
UPTAG0765	712	0	1158	894	0	675	0	1086	560	0	861	0	858	929	0	522	0	1028	880	0
UPTAG0766	5	9	4	5	0	4	6	9	1	0	5	7	2	2	0	1	0	4	2	0
UPTAG0767	729	0	743	866	0	699	0	795	529	0	920	0	676	967	0	561	0	823	900	0
UPTAG0768	2167	930	1579	1126	0	2068	955	1695	773	0	2321	1187	1611	1115	0	1417	930	2193	1035	1
UPTAG0769	742	1242	0	485	0	817	1211	0	380	0	1025	816	0	900	0	588	675	1	853	0
UPTAG0770	738	268	664	612	0	703	220	630	405	0	977	365	810	909	0	739	157	1023	908	0
UPTAG0771	893	463	782	0	0	647	557	805	0	0	1050	744	721	1	0	576	643	925	2	0
UPTAG0772	799	802	693	264	0	774	830	716	109	0	1081	828	631	267	0	714	681	728	174	0
UPTAG0773	668	0	669	587	0	686	0	653	525	0	924	0	621	590	0	549	0	836	554	0
UPTAG0774	407	411	380	289	0	374	421	397	176	0	480	353	396	338	0	77	252	499	321	0
UPTAG0775	696	698	585	758	0	710	775	633	401	0	699	793	710	694	0	512	618	820	865	0
UPTAG0776	778	690	770	662	0	759	704	830	561	0	805	745	689	820	0	671	657	917	729	0
UPTAG0777	370	922	766	699	0	264	968	743	607	0	398	752	647	836	1	151	641	894	784	0
UPTAG0778	919	974	754	801	0	929	946	892	412	0	1017	925	668	624	0	792	635	881	555	0
UPTAG0779	0	768	771	443	0	0	786	812	229	0	0	752	575	550	0	0	480	562	490	0
UPTAG0780	909	0	959	652	0	883	1	899	549	0	866	0	594	1020	0	673	0	735	887	0
UPTAG0781	777	577	716	830	0	752	558	838	530	0	1137	829	953	990	0	722	530	1262	982	0
UPTAG0782	752	714	594	851	0	728	796	773	520	0	833	860	746	623	0	656	668	935	803	0
UPTAG0783	644	682	554	757	0	669	704	618	429	0	786	924	539	767	0	510	678	585	667	0
UPTAG0784	688	699	661	841	0	689	773	697	456	0	896	862	577	632	0	468	675	798	649	0
UPTAG0785	679	738	812	641	0	640	814	886	374	0	761	850	727	483	0	710	685	840	542	0
UPTAG0786	609	715	768	468	0	480	909	807	311	0	699	682	685	518	0	338	573	850	557	0
UPTAG0787	729	945	861	372	0	661	943	846	255	0	770	848	728	456	0	436	676	979	418	0
UPTAG0788	979	755	755	406	0	691	771	868	271	0	870	668	628	529	0	472	520	897	384	1
UPTAG0789	865	0	992	507	0	784	1	1050	326	0	868	0	772	567	0	591	1	1125	479	0
UPTAG0790	773	882	833	296	0	749	872	842	160	0	921	837	665	384	0	625	608	1047	266	0
UPTAG0791	621	729	0	720	0	610	629	0	380	0	663	792	0	643	0	403	419	0	593	0
UPTAG0792	1	813	1177	372	0	0	710	1118	182	0	0	970	1330	476	1	0	601	1853	211	0
UPTAG0793	476	0	0	800	0	317	0	0	509	0	544	0	0	690	0	195	0	0	522	0
UPTAG0794	0	533	786	1	0	0	607	841	0	0	0	754	838	0	0	0	538	1204	0	0
UPTAG0795	568	815	783	113	0	492	754	902	23	0	614	927	686	164	0	373	605	917	50	0
UPTAG0796	643	756	670	486	0	515	720	744	161	0	613	776	624	286	0	352	611	824	169	0
UPTAG0797	782	649	916	947	0	834	592	1009	579	0	877	796	639	776	0	726	571	966	704	0
UPTAG0798	443	625	794	416	0	333	416	728	166	0	298	496	526	276	0	219	280	673	163	0
UPTAG0799	775	865	958	517	0	760	860	933	438	0	736	790	642	509	0	576	603	752	638	0
UPTAG0800	811	883	1073	0	0	805	950	1049	0	0	862	688	687	0	0	642	565	858	0	0
UPTAG0801	815	945	934	643	0	850	924	1009	400	0	746	775	672	656	0	642	673	1022	531	0
UPTAG0802	522	0	768	488	0	482	0	617	353	0	291	0	607	606	0	181	0	617	545	0
UPTAG0803	895	851	522	708	0	819	887	498	522	0	890	1008	413	1010	0	652	849	547	803	0
UPTAG0804	823	741	1242	547	0	763	763	1306	339	0	846	845	798	545	0	542	724	1070	528	0
UPTAG0805	527	712	0	867	0	511	713	0	489	0	677	986	0	743	0	235	771	0	783	0
UPTAG0806	677	838	951	0	0	662	816	1000	1	0	753	1029	871	0	0	560	801	1246	1	0
UPTAG0807	668	516	710	580	0	646	457	738	418	0	790	600	553	727	1	476	450	783	569	0
UPTAG0808	221	179	266	164	0	252	176	342	34	0	205	203	184	111	0	34	131	256	121	0
UPTAG0809	628	0	0	522	0	522	0	0	434	0	608	0	0	472	0	379	0	0	384	0
UPTAG0810	0	0	774	566	0	0	0	934	276	0	0	0	576	504	0	0	0	790	469	0
UPTAG0811	729	816	949	405	1	717	769	992	229	0	729	729	561	439	0	606	517	885	257	0
UPTAG0812	686	397	1027	252	0	630	284	875	204	0	572	471	824	387	0	540	245	1017	280	0
UPTAG0813	762	782	969	561	0	800	693	1109	398	0	749	775	720	666	0	609	562	1107	572	0
UPTAG0814	983	289	804	643	0	878	203	829	354	0	835	429	570	854	0	711	208	829	698	0
UPTAG0815	721	0	408	0	0	665	0	370	1	0	732	0	420	0	0	623	0	498	0	0
UPTAG0816	575	785	0	0	0	448	845	0	0	0	524	768	0	0	1	271	529	0	0	0
UPTAG0817	910	827	811	682	0	944	882	788	350	0	953	966	766	718	0	584	798	1082	474	0
UPTAG0818	697	648	754	613	0	670	624	799	476	0	763	770	668	816	0	501	707	978	816	0
UPTAG0819	676	606	756	508	0	694	610	673	345	0	595	612	578	593	0	305	478	846	495	0
UPTAG0820	929	861	0	564	0	915	937	0	322	0	925	893	0	430	0	542	734	0	261	0
UPTAG0821	747	0	521	540	0	709	0	365	313	0	655	0	350	488	0	331	0	362	362	0
UPTAG0822	1077	539	744	536	0	969	456	868	294	0	810	653	636	422	0	552	385	825	294	0
UPTAG0823	800	576	924	0	0	752	616	824	0	0	690	573	652	0	0	514	365	819	0	0
UPTAG0824	819	517	740	428	0	760	525	734	240	0	688	484	645	534	0	398	393	851	433	0
UPTAG0825	791	729	766	616	0	687	746	699	428	0	626	736	556	848	0	482	544	766	720	0
UPTAG0826	822	517	775	434	0	803	568	768	124	0	819	655	536	533	0	482	478	795	394	0
UPTAG0827	750	738	777	0	0	738	832	729	1	0	866	865	740	0	0	719	727	829	0	0
UPTAG0828	744	970	741	743	0	663	940	756	707	1	854	1025	704	838	0	653	669	922	780	0
UPTAG0829	0	376	610	487	0	0	282	593	195	0	0	545	659	296	0	0	310	856	119	0
UPTAG0830	709	685	708	282	0	686	730	731	82	0	719	805	671	394	0	485	613	868	169	0
UPTAG0831	742	789	1	557	0	692	780	0	233	0	692	900	0	631	0	596	738	0	456	0
UPTAG0832	863	553	857	553	0	708	654	825	247	0	708	540	596	534	0	362	472	809	323	0
UPTAG0833	830	785	891	575	1	631	806	808	321	0	700	771	696	463	0	608	554	819	356	0
UPTAG0834	631	769	822	294	0	591	901	882	179	0	677	797	660	374	0	447	656	897	273	0
UPTAG0835	718	807	763	592	0	431	809	803	337	0	731	713	595	520	0	293	553	987	470	0
UPTAG0836	0	647	812	426	0	0	726	801	217	0	0	620	587	480	0	0	573	851	362	0
UPTAG0837	1	586	712	443	0	0	588	808	236	0	0	573	598	458	0	0	439	706	318	0
UPTAG0838	398	385	477	0	0	378	347	626	0	0	388	416	396	0	0	85	279	542	0	0
UPTAG0839	809	322	0	343	0	687	324	0	279	0	794	458	0	447	0	631	310	0	363	0
UPTAG0840	713	0	682	619	0	689	0	669	388	0	877	0	724	661	0	777	0	865	452	0
UPTAG0841	363	889	1387	454	0	226	1013	1539	223	0	480	929	1752	351	0	163	667	2473	165	0
UPTAG0842	597	815	791	0	0	433	850	910	0	0	589	639	783	0	0	289	551	1045	0	0
UPTAG0843	793	251	1477	577	0	817	194	1328	396	0	793	324	1229	606	0	611	206	1482	557	0
UPTAG0844	770	852	477	566	0	712	920	259	337	0	755	734	382	561	0	455	647	171	446	0
UPTAG0845	929	481	1315	634	0	907	434	1432	337	0	787	571	1233	570	0	667	385	1534	442	0
UPTAG0846	964	0	825	655	0	894	0	923	481	0	926	0	649	601	0	704	0	927	584	0
UPTAG0847	849	601	918	0	0	777	633	915	0	0	743	680	617	0	0	454	486	878	0	0
UPTAG0848	713	0	806	99	0	767	0	864	41	1	692	0	735	233	0	388	0	901	68	0
UPTAG0849	491	659	876	375	0	470	616	841	231	0	498	666	645	477	0	394	454	831	244	0
UPTAG0850	821	208	702	598	0	796	131	763	205	0	844	307	630	482	0	459	142	843	332	0
UPTAG0851	812	824	1460	660	0	718	777	1600	428	0	861	954	1332	637	0	759	776	1879	579	0
UPTAG0852	677	0	1	533	0	706	0	0	164	0	863	0	0	423	0	782	0	0	320	0
UPTAG0853	874	952	1022	333	0	839	961	1106	174	0	1045	690	1213	413	1	712	602	1376	285	0
UPTAG0854	926	938	1068	830	0	909	1104	1128	774	0	1004	895	831	855	0	815	671	1186	777	0
UPTAG0855	0	911	0	634	0	0	798	0	292	0	0	835	0	519	0	0	577	0	456	0
UPTAG0856	813	534	1	0	0	811	415	0	0	0	920	448	0	0	0	444	295	0	1	3
UPTAG0857	754	0	0	644	0	758	0	0	469	0	942	0	0	668	0	702	0	0	605	0
UPTAG0858	665	830	615	638	0	680	673	742	351	0	810	866	641	765	0	691	536	871	575	0
UPTAG0859	758	444	779	0	0	721	290	796	0	0	939	408	649	0	0	810	191	851	0	0
UPTAG0860	726	779	317	595	0	726	871	278	351	0	907	755	353	664	0	682	717	282	625	0
UPTAG0861	416	581	122	552	0	468	489	78	205	0	583	755	231	468	0	237	402	93	423	0
UPTAG0862	999	907	978	592	0	889	1043	1034	343	0	1190	1014	1345	622	0	637	819	1695	482	0
UPTAG0863	932	859	743	0	0	857	921	761	1	0	926	957	507	0	0	838	746	619	0	0
UPTAG0864	617	738	0	616	0	633	791	0	184	0	775	918	0	666	0	217	741	0	582	0
UPTAG0865	774	217	0	0	0	795	151	0	0	0	892	198	0	0	0	433	81	0	0	0
UPTAG0866	889	829	730	481	0	794	806	750	167	0	1183	1012	769	841	0	682	820	1044	551	0
UPTAG0867	718	762	583	655	0	678	811	589	427	0	976	918	675	716	0	739	732	752	786	0
UPTAG0868	738	694	87	363	0	696	783	52	196	0	1057	853	143	504	0	759	626	81	306	0
UPTAG0869	0	691	744	481	0	0	739	736	264	0	0	788	748	510	0	0	535	932	336	0
UPTAG0870	828	776	266	554	0	788	793	155	282	0	887	673	186	561	0	417	661	87	260	0
UPTAG0871	605	746	247	360	0	646	741	202	107	0	663	613	211	357	0	162	537	143	239	0
UPTAG0872	847	1307	826	433	0	806	1293	865	242	0	963	1406	707	351	0	849	1061	952	216	0
UPTAG0873	718	330	877	549	0	649	299	840	319	0	854	545	642	401	0	495	311	882	325	0
UPTAG0874	500	757	896	513	0	449	782	887	198	0	488	904	682	367	0	303	631	819	223	0
UPTAG0875	978	976	2621	476	0	1006	1046	3000	279	0	925	1120	2177	550	0	708	923	3219	370	0
UPTAG0876	1188	960	828	539	0	1186	1097	817	310	0	955	1181	747	751	0	616	804	901	644	0
UPTAG0877	746	712	568	0	0	777	766	694	0	0	889	872	771	0	0	671	706	896	0	0
UPTAG0878	0	0	536	774	0	0	0	595	464	0	0	0	509	742	0	1	0	703	579	0
UPTAG0879	664	638	244	758	0	605	615	158	477	0	830	748	268	775	1	476	631	202	636	0
UPTAG0880	0	559	666	643	0	0	627	799	316	0	0	611	539	563	0	0	528	743	428	0
UPTAG0881	781	0	956	655	0	688	0	984	325	0	760	0	615	603	0	660	0	793	546	0
UPTAG0882	802	439	870	398	0	819	334	910	204	0	964	478	754	435	0	635	311	848	239	0
UPTAG0883	426	850	0	717	0	340	953	0	371	0	428	955	0	630	0	305	755	0	492	0
UPTAG0884	630	899	399	328	0	604	816	278	148	0	601	794	440	311	0	543	590	318	301	0
UPTAG0885	0	448	945	523	0	0	366	940	345	0	0	555	671	571	0	0	222	915	533	0
UPTAG0886	789	766	568	565	0	839	832	855	173	0	777	663	595	457	0	672	609	923	296	0
UPTAG0887	850	0	733	644	0	774	0	885	239	0	951	0	515	709	0	780	0	750	422	0
UPTAG0888	928	764	749	464	0	905	842	787	177	0	846	1081	723	709	0	228	912	1088	382	0
UPTAG0889	613	637	631	596	0	581	646	710	223	0	842	887	842	524	0	657	745	1048	418	0
UPTAG0890	782	488	676	420	0	720	395	825	177	0	793	645	677	469	0	543	465	924	304	0
UPTAG0891	769	186	689	295	0	514	133	748	58	0	841	318	594	386	0	429	149	832	205	0
UPTAG0892	0	608	807	882	0	0	504	844	310	0	0	628	668	588	1	0	335	909	413	0
UPTAG0893	568	787	965	672	1	351	810	1146	259	0	630	792	720	537	0	218	633	908	344	0
UPTAG0894	189	815	1036	439	0	72	917	1132	235	0	241	673	757	486	0	106	597	1031	410	0
UPTAG0895	907	0	591	355	0	968	0	604	93	0	930	0	545	324	0	475	0	542	174	0
UPTAG0896	792	0	950	577	0	764	0	1093	278	0	803	0	714	611	0	730	0	1091	460	0
UPTAG0897	702	754	850	0	0	597	721	874	0	0	767	712	724	0	0	557	664	1079	0	0
UPTAG0898	243	896	1054	316	0	135	947	1203	137	0	312	809	801	441	0	108	770	1041	339	0
UPTAG0899	804	352	1020	394	0	796	268	1059	215	0	901	546	847	607	0	576	345	1202	438	0
UPTAG0900	982	0	664	717	0	993	0	820	397	0	1134	0	700	825	0	789	0	1016	773	0
UPTAG0901	726	737	762	414	0	692	754	766	237	0	858	1025	918	578	0	720	726	1180	518	0
UPTAG0902	602	706	0	317	0	641	688	0	142	0	729	736	0	386	0	462	603	0	365	1
UPTAG0903	810	585	946	363	0	778	488	1033	232	0	695	604	631	272	0	612	366	888	258	0
UPTAG0904	701	517	754	602	0	853	469	857	235	0	820	516	600	325	0	601	344	671	380	0
UPTAG0905	668	633	451	0	0	861	629	497	1	0	805	721	376	0	0	335	465	534	0	0
UPTAG0906	725	861	681	0	0	756	955	600	1	0	817	801	564	0	0	712	730	611	0	0
UPTAG0907	813	1108	981	420	0	779	1117	1021	214	0	721	945	680	547	0	594	816	972	429	2
UPTAG0908	810	606	783	359	1	813	753	794	186	0	833	713	758	372	0	289	560	947	379	0
UPTAG0909	804	782	591	420	0	781	801	732	152	0	738	860	680	463	0	692	726	698	559	0
UPTAG0910	771	794	681	279	0	695	900	770	132	0	819	1021	620	443	0	718	802	890	380	0
UPTAG0911	695	0	560	422	0	698	0	704	189	0	743	0	493	570	0	410	0	691	501	0
UPTAG0912	1122	866	812	529	0	1064	938	974	310	0	945	954	925	621	0	447	901	1261	721	0
UPTAG0913	628	795	25	373	0	679	836	4	239	0	791	953	110	634	0	657	805	54	508	0
UPTAG0914	666	726	547	402	0	638	727	740	138	0	680	803	689	347	0	500	575	785	546	0
UPTAG0915	0	779	806	511	0	0	854	862	284	0	2	843	647	569	0	0	831	946	496	0
UPTAG0916	599	630	729	773	0	536	596	728	483	0	579	601	506	724	0	468	598	664	657	0
UPTAG0917	927	741	754	0	0	835	765	722	0	0	794	669	592	0	0	581	590	746	0	0
UPTAG0918	830	675	458	505	0	721	647	453	209	0	894	521	478	337	0	620	465	541	462	0
UPTAG0919	727	781	849	652	0	712	740	681	382	0	735	698	622	680	0	525	557	614	690	0
UPTAG0920	822	691	891	395	0	700	582	928	233	0	715	672	627	558	0	428	529	865	414	0
UPTAG0921	665	666	828	324	0	663	689	905	140	0	656	721	639	417	0	541	588	798	374	0
UPTAG0922	1	738	0	711	0	0	842	0	451	0	0	817	0	858	0	0	701	0	859	0
UPTAG0923	832	813	669	428	0	794	895	737	299	0	925	981	603	647	0	471	814	882	515	0
UPTAG0924	931	1061	730	656	0	941	984	856	465	0	1045	1117	792	797	0	296	903	1106	735	0
UPTAG0926	749	628	358	0	0	629	699	302	0	0	672	642	361	0	0	438	500	232	0	0
UPTAG0927	1085	785	929	679	0	1014	946	1068	400	0	1022	815	622	681	0	675	697	1029	596	0
UPTAG0928	958	811	871	1034	0	848	819	898	777	0	870	708	658	876	0	687	652	819	801	0
UPTAG0929	884	771	953	0	0	911	713	941	0	0	780	812	700	0	0	577	502	914	0	0
UPTAG0930	845	749	812	829	0	897	716	908	549	0	732	776	637	786	0	640	552	972	783	0
UPTAG0931	828	1441	857	451	0	828	1691	908	312	0	793	1679	703	719	0	355	1330	1127	584	0
UPTAG0932	934	0	825	418	0	898	0	807	400	0	847	0	486	627	0	684	0	828	532	0
UPTAG0933	794	540	865	0	0	831	479	1016	0	0	804	624	691	0	0	584	482	1042	0	0
UPTAG0934	926	0	806	381	0	857	0	852	236	0	921	0	661	473	0	644	0	904	464	1
UPTAG0935	669	962	765	433	0	528	1014	761	245	0	788	984	785	566	0	573	703	1166	435	0
UPTAG0936	790	569	686	510	0	745	626	659	320	0	868	984	784	554	0	414	784	1054	526	0
UPTAG0937	849	536	676	1051	0	755	502	809	670	0	920	712	819	828	0	175	403	1187	956	0
UPTAG0938	0	0	1201	0	0	0	0	1226	0	0	0	0	809	0	0	0	0	1164	0	0
UPTAG0939	703	749	586	567	0	671	697	742	181	0	701	661	559	414	0	502	395	757	377	0
UPTAG0940	972	909	807	343	0	864	1048	832	250	0	917	1011	677	460	1	457	811	948	502	0
UPTAG0941	879	0	810	0	0	884	0	840	0	0	878	0	673	0	0	522	0	905	0	0
UPTAG0943	907	0	732	482	0	802	0	888	310	0	838	0	579	524	0	610	0	892	445	0
UPTAG0944	946	777	1001	465	0	948	889	1031	280	0	1021	766	743	490	0	753	687	1035	405	0
UPTAG0945	1023	775	918	426	0	988	868	1026	276	0	924	798	713	632	0	645	669	1065	490	0
UPTAG0946	956	891	0	556	0	845	956	0	294	0	1043	934	0	604	0	626	856	0	512	0
UPTAG0947	1635	0	835	802	0	1557	0	990	521	0	1872	0	839	803	0	1306	0	1257	839	0
UPTAG0948	832	0	0	691	0	591	1	0	423	0	1128	0	0	759	0	611	0	0	637	1
UPTAG0949	899	243	0	594	0	719	218	0	360	0	980	412	0	588	0	591	359	0	381	0
UPTAG0950	904	0	816	645	1	809	0	788	312	0	1045	0	660	627	0	325	0	924	440	0
UPTAG0951	824	0	0	585	0	773	0	0	364	0	900	0	0	568	0	584	0	0	348	0
UPTAG0952	669	802	0	644	0	623	701	0	337	0	801	708	0	532	0	559	466	0	575	0
UPTAG0953	800	0	566	862	1	759	1	627	337	0	966	0	650	727	0	890	0	698	855	0
UPTAG0954	487	912	656	622	0	536	832	665	379	0	681	915	583	855	0	504	706	812	635	0
UPTAG0955	707	530	0	597	0	762	510	0	320	0	872	659	0	681	0	570	301	0	441	0
UPTAG0956	697	694	874	660	0	722	734	874	363	0	834	899	715	733	0	666	604	1072	544	0
UPTAG0957	907	936	707	630	0	781	916	745	269	0	1018	1146	701	598	0	657	689	879	439	0
UPTAG0958	710	825	903	831	0	538	737	1047	360	0	690	828	789	642	1	301	670	928	672	0
UPTAG0959	837	544	941	0	0	772	579	895	0	0	929	731	935	0	0	802	539	1191	0	0
UPTAG0960	1126	998	2219	770	0	1070	917	2283	411	0	1252	1300	2241	710	0	1028	1083	3245	582	0
UPTAG0961	812	1015	909	130	0	752	905	981	30	0	1060	885	1210	291	0	736	792	1444	138	0
UPTAG0963	715	968	0	0	0	716	956	0	0	0	847	1034	0	0	0	617	784	0	0	0
UPTAG0964	533	0	0	0	0	541	0	0	0	0	583	0	0	0	0	333	0	1	0	0
UPTAG0965	0	278	681	605	0	0	185	683	355	0	0	340	578	556	0	0	151	741	477	0
UPTAG0966	788	493	0	484	0	695	483	0	305	0	960	573	0	604	0	560	392	0	487	1
UPTAG0967	740	571	0	479	0	682	488	0	326	0	872	609	0	750	0	684	350	0	568	0
UPTAG0968	0	570	0	579	0	0	634	0	355	0	0	590	0	728	0	0	478	0	608	0
UPTAG0969	812	606	0	190	0	659	611	0	48	0	810	640	0	361	0	665	405	0	204	0
UPTAG0970	763	795	0	0	0	769	708	0	0	0	730	676	0	0	0	614	561	0	0	0
UPTAG0971	817	1012	0	0	0	781	1004	0	0	0	895	1151	0	0	0	537	848	0	0	0
UPTAG0972	1070	388	0	0	0	1016	371	0	0	0	947	548	1	0	0	691	338	0	0	0
UPTAG0973	742	447	0	635	0	749	340	0	330	0	940	805	0	853	0	578	451	0	609	0
UPTAG0974	0	447	0	427	0	0	487	0	288	0	0	646	0	684	0	0	480	0	426	0
UPTAG0975	745	753	0	495	0	700	831	0	258	0	890	903	0	431	0	765	758	0	433	0
UPTAG0976	841	823	0	778	0	881	742	0	476	0	1074	942	0	573	0	623	648	0	492	2
UPTAG0977	776	991	0	446	0	710	1000	0	182	1	846	1028	0	557	0	525	677	0	370	0
UPTAG0978	0	827	0	422	0	0	864	0	307	0	0	735	0	584	0	0	577	0	503	0
UPTAG0979	775	497	0	482	0	768	430	0	326	0	791	655	0	524	0	677	324	0	494	0
UPTAG0980	843	549	0	720	0	779	418	0	508	0	862	435	0	678	0	668	301	0	707	0
UPTAG0981	779	644	0	291	0	711	471	0	118	0	826	589	0	394	0	555	298	0	169	0
UPTAG0982	766	509	0	461	0	694	419	0	214	0	861	384	1	478	0	612	238	0	331	0
UPTAG0983	769	594	0	353	0	847	552	0	139	0	1001	681	0	548	0	465	366	0	356	0
UPTAG0984	768	512	0	1326	0	752	448	1	509	0	760	701	0	1221	0	550	390	0	654	0
UPTAG0985	523	545	0	860	1	435	422	0	467	0	769	871	0	685	0	349	481	0	600	0
UPTAG0986	580	721	0	515	0	684	797	0	181	0	728	936	0	423	0	609	717	1	391	0
UPTAG0987	582	778	0	416	0	405	729	0	122	0	558	994	0	353	0	263	698	0	180	0
UPTAG0988	881	439	0	419	0	777	413	0	204	0	764	496	1	303	0	486	385	0	148	0
UPTAG0989	1006	0	0	654	0	1016	0	0	318	0	984	0	0	437	0	863	0	0	318	0
UPTAG0990	785	1081	0	663	1	800	1060	1	314	0	764	882	0	489	0	461	670	0	368	0
UPTAG0991	491	0	0	275	1	544	0	0	113	0	446	0	0	241	0	75	0	0	214	0
UPTAG0992	0	0	0	290	0	0	0	0	107	0	0	0	0	297	0	1	0	0	110	0
UPTAG0993	679	713	0	263	0	637	800	0	94	0	608	715	0	268	0	530	528	0	164	0
UPTAG0994	841	808	0	1	0	751	804	0	0	0	799	1043	0	0	1	752	848	1	0	0
UPTAG0995	19	24	0	25	0	22	20	0	12	0	24	24	0	23	0	5	16	0	20	0
UPTAG0996	859	0	0	0	0	922	0	0	0	0	993	0	0	0	2	797	0	0	0	0
UPTAG0997	804	759	0	852	0	857	878	0	385	0	910	1145	0	736	0	635	904	0	722	0
UPTAG0998	830	871	0	404	0	770	906	0	179	0	775	1173	0	524	0	664	832	0	433	0
UPTAG0999	699	628	0	0	0	699	742	0	0	0	717	735	0	0	0	689	618	0	0	0
UPTAG1000	726	448	0	612	1	697	382	0	265	0	793	486	0	488	0	648	263	0	442	0
UPTAG1001	857	757	0	380	0	709	756	0	278	0	763	679	0	492	0	397	652	0	396	0
UPTAG1002	826	455	0	534	0	823	388	0	283	0	819	507	0	500	0	576	319	0	381	0
UPTAG1003	924	690	0	302	0	873	612	0	92	0	784	644	0	333	0	694	437	1	252	0
UPTAG1004	757	711	0	217	0	641	783	0	103	0	659	638	0	363	0	566	637	0	271	0
UPTAG1005	754	540	0	391	0	786	550	0	235	0	793	581	0	499	0	503	461	0	420	0
UPTAG1006	0	171	0	0	0	0	113	0	2	0	0	316	0	0	0	1	91	0	0	0
UPTAG1007	617	733	0	590	0	657	772	0	267	0	682	817	0	380	0	559	678	0	642	0
UPTAG1008	633	855	0	534	0	628	737	0	166	0	727	925	0	337	0	477	778	0	320	0
UPTAG1009	651	809	0	458	0	704	742	0	169	0	802	880	0	331	0	666	634	0	354	0
UPTAG1010	584	691	0	442	0	628	695	0	136	0	675	877	0	359	0	678	658	0	378	0
UPTAG1011	908	729	0	433	0	755	718	0	235	0	752	780	0	432	0	456	580	0	370	0
UPTAG1012	0	751	0	696	0	0	949	0	432	0	0	823	0	591	0	0	674	0	601	0
UPTAG1013	863	811	0	505	0	773	870	0	265	0	817	812	0	457	0	603	648	0	434	0
UPTAG1014	797	783	0	496	0	836	890	0	245	0	754	827	0	465	0	451	738	0	422	0
UPTAG1015	254	665	0	653	0	109	666	0	386	0	142	717	0	638	0	33	517	0	565	0
UPTAG1016	870	673	0	280	0	808	696	0	147	0	758	603	1	352	0	492	528	0	264	0
UPTAG1017	0	881	0	302	0	0	893	0	185	0	0	879	0	412	0	0	739	0	275	0
UPTAG1018	776	682	0	463	0	645	757	0	236	0	710	805	0	570	0	352	569	0	480	0
UPTAG1019	828	0	0	260	0	841	0	0	124	0	881	0	0	430	0	591	0	0	259	0
UPTAG1020	730	801	0	626	0	625	880	0	477	0	897	951	0	672	0	563	779	0	529	0
UPTAG1021	859	774	0	1020	0	862	800	0	840	0	832	848	0	954	0	422	636	0	857	0
UPTAG1022	978	817	0	696	0	800	845	0	465	0	859	843	0	639	0	666	650	0	732	0
UPTAG1023	1111	0	0	372	0	1006	0	0	197	0	955	0	0	401	0	594	0	0	333	0
UPTAG1024	796	376	0	546	0	793	240	0	399	0	700	369	1	612	0	443	198	0	626	0
UPTAG1025	837	748	0	726	0	800	786	0	391	0	720	724	0	663	0	528	660	2	643	0
UPTAG1026	863	748	0	538	0	735	811	0	294	0	801	575	0	569	0	492	561	0	700	0
UPTAG1027	0	598	0	659	0	0	528	0	465	0	0	656	0	707	0	1	445	0	607	0
UPTAG1028	835	718	0	594	0	817	729	0	332	0	824	774	0	635	0	535	570	0	680	0
UPTAG1029	873	684	0	79	0	845	726	0	35	0	752	721	0	193	0	633	610	0	80	1
UPTAG1030	810	709	0	582	0	843	808	0	415	0	803	751	0	701	0	586	664	0	702	0
UPTAG1031	724	584	0	709	0	673	568	0	536	0	770	733	0	750	0	358	608	0	740	0
UPTAG1032	666	801	1	86	0	743	805	0	15	0	903	1039	1	166	0	620	789	0	114	0
UPTAG1033	1324	895	1	984	0	1131	1014	0	636	0	1192	778	0	820	0	919	636	0	658	0
UPTAG1034	826	943	0	931	0	838	930	0	585	0	925	900	0	817	0	597	723	0	795	0
UPTAG1035	838	972	0	755	0	911	910	0	511	0	931	961	0	657	0	576	692	0	664	0
UPTAG1036	813	0	0	711	0	786	0	0	306	0	871	0	1	719	0	634	0	0	640	0
UPTAG1037	573	796	0	459	0	547	796	0	403	0	575	806	0	593	0	76	628	0	498	0
UPTAG1038	533	839	0	588	1	538	858	0	492	0	505	799	0	685	0	332	687	0	687	0
UPTAG1039	789	881	0	678	0	756	934	0	549	0	852	956	0	792	0	661	729	0	681	0
UPTAG1040	739	378	0	336	0	657	391	0	260	0	694	392	0	333	0	554	327	0	302	0
UPTAG1041	800	764	1	639	0	789	772	0	462	0	829	783	0	827	0	588	730	0	750	0
UPTAG1042	773	0	0	270	0	731	0	0	101	0	736	0	0	309	0	373	0	0	129	0
UPTAG1043	767	606	0	726	0	790	542	0	511	0	878	772	0	612	0	679	587	0	575	0
UPTAG1044	282	208	0	0	0	379	263	0	0	0	394	458	0	0	0	51	296	0	0	0
UPTAG1045	795	1356	0	1209	1	758	1446	0	677	0	740	798	0	944	0	649	641	0	668	0
UPTAG1046	1062	1292	0	0	0	959	1433	0	2	0	1165	977	0	0	0	1139	755	0	0	0
UPTAG1047	867	537	0	477	0	803	532	0	290	0	990	508	1	525	0	603	408	0	322	0
UPTAG1048	683	0	0	810	0	604	0	0	653	0	836	0	0	845	0	546	0	0	748	0
UPTAG1049	285	2642	0	386	0	229	2743	0	163	1	414	1855	0	333	0	208	1514	0	140	0
UPTAG1050	827	1090	0	669	0	697	990	0	304	0	895	871	0	612	0	564	627	0	478	0
UPTAG1051	870	1307	0	1051	0	825	1437	0	711	0	924	981	0	1082	0	529	812	0	1131	0
UPTAG1052	737	1221	0	602	0	616	1308	0	300	0	895	990	0	549	0	546	821	0	493	0
UPTAG1053	381	847	0	565	0	293	797	0	145	0	481	593	0	351	0	128	410	0	541	0
UPTAG1054	816	1162	0	961	0	805	1172	0	586	0	1022	1139	0	941	0	766	872	0	760	0
UPTAG1055	778	1204	0	582	0	806	1272	0	213	0	1123	947	0	693	0	521	789	0	460	0
UPTAG1056	0	1418	0	849	0	0	1264	0	519	0	0	1246	0	822	1	0	852	0	760	0
UPTAG1057	778	620	0	0	0	732	530	0	0	0	851	609	0	0	0	490	374	0	0	0
UPTAG1058	648	356	433	338	0	741	285	530	105	0	790	485	651	509	0	531	261	655	350	0
UPTAG1059	569	489	0	109	0	501	443	0	32	0	788	740	0	350	0	387	519	0	184	0
UPTAG1060	826	800	747	0	0	654	714	793	3	0	976	767	657	1	0	850	673	863	0	0
UPTAG1061	894	902	0	688	0	806	875	0	474	0	1056	809	1	704	0	719	731	0	613	0
UPTAG1062	2	790	761	725	0	0	926	877	379	0	0	843	676	791	0	2	659	982	763	0
UPTAG1063	0	522	852	0	0	0	370	931	1	0	0	606	653	0	0	0	294	876	0	0
UPTAG1064	0	425	764	628	0	0	287	886	305	0	0	285	655	644	0	1	124	1007	549	0
UPTAG1065	0	793	949	462	0	0	671	852	460	0	0	637	708	612	0	0	407	898	484	0
UPTAG1066	830	631	0	559	1	798	495	0	344	0	815	499	0	540	0	454	335	0	431	0
UPTAG1067	0	1183	891	0	0	0	1162	841	0	0	0	1271	708	1	0	0	853	1059	0	0
UPTAG1068	2	1070	478	813	0	0	840	536	343	0	0	1152	666	696	0	0	647	783	1350	0
UPTAG1069	826	847	0	950	0	764	832	0	644	0	976	992	0	927	0	711	769	0	782	0
UPTAG1070	0	0	827	928	0	0	0	781	701	0	0	0	633	1010	0	0	0	951	871	0
UPTAG1071	0	745	598	526	0	0	703	633	272	0	0	891	537	328	0	0	778	702	411	0
UPTAG1072	844	554	752	283	0	712	536	802	118	0	955	645	519	386	0	579	584	847	210	0
UPTAG1073	0	854	875	443	0	0	892	1005	294	0	0	869	760	508	1	0	744	1092	456	0
UPTAG1074	942	868	705	555	0	854	864	775	429	0	948	735	535	618	0	425	613	731	558	0
UPTAG1075	800	857	957	599	0	729	931	839	563	0	779	780	583	700	0	576	654	773	535	0
UPTAG1076	822	722	1149	613	0	907	617	1156	433	0	821	657	796	583	0	666	458	1221	431	1
UPTAG1077	582	0	896	469	0	500	0	846	326	0	632	0	556	633	0	431	0	796	501	0
UPTAG1078	818	749	0	563	0	797	671	0	304	0	801	715	0	745	0	586	470	0	567	0
UPTAG1079	880	0	944	0	0	824	0	881	0	0	911	0	668	0	0	676	0	865	0	0
UPTAG1080	668	622	708	502	1	671	645	789	208	0	763	851	724	615	0	505	571	1137	452	0
UPTAG1081	754	0	776	539	0	679	0	765	391	0	863	0	978	699	0	732	0	1171	511	0
UPTAG1082	598	340	819	351	0	633	192	748	177	0	687	495	669	398	0	279	179	899	193	0
UPTAG1083	36	0	32	38	0	63	0	48	6	0	60	0	28	22	0	3	0	53	27	0
UPTAG1084	690	295	799	610	0	681	215	803	355	0	653	366	631	619	0	471	194	775	468	1
UPTAG1085	732	799	926	839	0	688	741	953	636	0	767	893	664	712	0	671	594	803	618	0
UPTAG1086	1033	412	929	691	0	919	298	1016	484	0	850	369	632	740	0	562	252	844	637	0
UPTAG1087	1133	547	1001	0	0	932	471	1122	0	0	883	533	748	0	0	755	300	1000	0	0
UPTAG1088	920	489	978	736	0	741	393	992	571	0	919	603	732	768	0	662	360	994	731	0
UPTAG1089	618	322	0	2	0	693	229	0	0	0	656	394	0	98	0	336	197	0	54	0
UPTAG1090	856	0	597	465	0	728	1	742	290	0	744	0	670	506	0	740	0	845	577	0
UPTAG1091	542	0	422	356	0	590	0	461	205	0	517	0	732	309	0	681	0	535	448	0
UPTAG1092	975	923	820	804	1	1023	929	839	595	2	1087	1015	1039	958	0	836	744	1300	903	0
UPTAG1093	519	419	598	522	0	485	353	644	310	0	594	649	787	549	0	508	372	777	563	0
UPTAG1094	827	674	634	0	0	783	810	558	2	0	884	873	549	0	0	490	691	590	0	0
UPTAG1095	940	0	580	613	0	874	0	566	433	0	796	0	408	592	0	669	0	626	495	0
UPTAG1096	693	500	0	830	0	771	489	0	559	0	614	432	1	710	0	445	257	0	697	0
UPTAG1097	950	517	901	430	0	1003	489	1026	334	0	820	594	720	426	0	696	384	1029	380	0
UPTAG1099	992	915	904	753	0	946	846	1038	512	0	989	824	742	860	0	666	656	959	736	0
UPTAG1100	946	713	882	607	0	896	652	849	426	0	865	671	607	781	0	444	538	885	699	0
UPTAG1101	947	776	1073	531	0	936	849	1127	346	0	912	702	807	669	0	513	764	1092	607	0
UPTAG1102	914	698	806	889	0	756	836	877	330	0	797	876	691	938	0	304	731	982	811	0
UPTAG1103	807	746	943	591	0	795	704	955	453	0	856	860	774	801	0	538	630	1298	747	0
UPTAG1104	231	0	605	713	0	179	0	689	504	0	359	0	755	808	0	132	0	1213	765	0
UPTAG1105	814	725	1643	904	0	708	772	1758	625	0	1013	914	1666	903	0	435	841	2370	827	0
UPTAG1106	807	747	1655	678	0	853	742	1836	317	0	918	742	1543	713	0	539	672	2011	697	0
UPTAG1107	572	744	507	636	0	566	724	841	318	0	555	739	541	518	0	435	567	728	583	0
UPTAG1108	864	669	872	687	0	800	732	796	590	0	837	758	627	682	0	523	526	856	609	0
UPTAG1109	802	612	921	633	0	749	562	936	560	0	633	524	783	662	0	376	416	939	616	0
UPTAG1110	1321	725	615	794	0	1143	828	674	396	0	1007	750	516	683	0	596	615	767	563	0
UPTAG1111	751	0	756	477	0	781	0	845	478	0	651	0	606	527	0	253	0	824	609	0
UPTAG1112	0	831	1034	749	0	1	974	1223	456	0	0	818	854	828	0	1	783	1205	757	0
UPTAG1113	0	820	943	563	0	0	928	868	457	0	0	949	607	805	0	0	794	948	734	0
UPTAG1114	1	781	821	602	0	0	716	897	529	0	0	801	641	692	0	0	585	901	718	0
UPTAG1115	0	790	762	787	0	0	894	869	632	0	0	990	701	880	0	1	782	1017	847	0
UPTAG1117	0	598	904	900	0	1	440	886	607	0	0	709	659	931	0	0	378	1080	672	0
UPTAG1118	0	2	6	2	0	0	3	8	1	0	0	4	11	1	0	0	2	9	2	0
UPTAG1119	0	840	0	238	0	0	731	0	61	0	0	793	0	389	0	1	635	0	235	0
UPTAG1120	0	0	1605	505	0	0	0	1730	262	0	0	0	1189	437	0	0	0	1663	484	0
UPTAG1121	0	769	789	0	0	0	795	907	0	0	0	809	716	0	0	0	564	902	0	0
UPTAG1122	0	845	749	0	0	0	810	827	0	0	0	824	671	0	0	1	623	849	0	0
UPTAG1123	0	507	801	462	0	0	481	829	257	0	0	611	551	567	0	1	517	874	372	0
UPTAG1124	0	765	814	0	0	0	678	970	1	0	0	634	669	0	0	1	517	997	0	0
UPTAG1125	0	669	851	0	0	0	714	867	0	0	0	662	679	0	0	0	621	905	0	0
UPTAG1126	0	732	826	0	0	0	699	918	0	0	0	766	660	0	0	2	657	970	0	0
UPTAG1127	0	768	1396	0	0	0	756	1553	0	0	0	925	1461	0	0	0	732	1975	0	0
UPTAG1128	0	0	622	0	0	0	0	669	0	0	0	0	726	0	0	1	0	1084	0	0
UPTAG1129	0	489	583	0	0	0	544	699	0	0	0	479	540	0	0	0	356	898	0	0
UPTAG1130	0	785	691	0	0	0	874	772	0	0	0	830	695	0	0	0	658	830	0	0
UPTAG1131	0	833	0	0	0	0	898	0	0	0	0	794	0	0	0	0	634	0	0	0
UPTAG1133	0	0	726	0	0	0	0	669	0	0	0	0	568	0	0	0	0	839	0	0
UPTAG1134	0	0	798	0	0	0	0	852	0	0	0	0	629	0	0	0	0	904	0	0
UPTAG1135	0	0	938	0	0	0	0	983	0	0	0	0	707	0	0	0	0	1010	0	0
UPTAG1136	0	0	842	0	0	0	0	932	0	0	0	0	660	0	0	0	0	896	0	0
UPTAG1137	0	0	982	0	0	0	0	1128	0	0	0	0	687	0	0	0	0	1095	0	0
UPTAG1138	0	0	1716	0	0	0	0	1787	0	0	0	0	1556	0	0	1	0	2091	0	0
UPTAG1140	0	0	0	0	0	0	0	0	0	0	0	0	0	0	0	1	0	0	0	0
UPTAG1141	0	0	2800	0	0	0	0	2923	0	0	0	0	3115	0	0	1	0	3879	0	0
UPTAG1142	0	0	1125	0	0	0	0	949	0	0	0	0	677	0	0	0	0	816	0	0
UPTAG1143	0	0	1789	0	0	0	0	1642	0	0	0	0	1502	0	0	0	0	1714	0	0
UPTAG1144	0	0	2123	0	0	0	0	2333	0	0	0	0	1963	0	0	0	0	2841	0	0
UPTAG1145	0	0	2599	0	0	0	1	2886	0	0	0	0	2359	0	0	0	0	3481	0	0
UPTAG1147	0	0	1506	0	0	0	0	1834	0	0	0	0	2197	0	0	1	0	2860	0	0
UPTAG1148	0	0	825	0	0	1	0	1007	0	0	0	0	1119	0	0	0	0	1537	0	0
UPTAG1149	0	0	2366	0	0	0	0	2692	0	0	0	0	2385	0	0	0	0	3264	0	0
UPTAG1150	0	0	661	0	0	0	0	924	0	0	0	0	714	0	0	0	0	941	0	0
UPTAGDOT1OE	602	593	565	263	630	599	600	541	149	734	1069	1109	810	972	1116	908	884	1001	922	1204
UPTAGH3K18R	326	332	303	126	271	180	195	196	64	179	353	371	352	534	393	139	130	154	223	186
UPTAGH4d	243	127	235	93	168	93	93	135	24	106	466	329	273	304	417	119	99	162	91	192
UPTAGbre1	592	437	449	170	410	495	412	378	126	457	590	681	445	818	680	334	469	558	579	612

## Sheet: raw_DownTag
	1_t0_A	2_t0_A	3_t0_A	4_t0_A	5_t0_A	1_t1_A	2_t1_A	3_t1_A	4_t1_A	5_t1_A	1_t0_B	2_t0_B	3_t0_B	4_t0_B	5_t0_B	1_t1_B	2_t1_B	3_t1_B	4_t1_B	5_t1_B
DNTAG0001	1307	741	617	392	0	1021	645	680	345	0	1501	793	1180	673	0	1277	769	1372	740	0
DNTAG0002	1	3	4	4	0	0	0	6	0	0	4	3	2	4	0	1	4	4	7	0
DNTAG0003	823	627	458	607	553	695	528	521	518	509	921	611	657	627	663	813	628	677	690	606
DNTAG0004	549	546	437	446	453	444	540	489	427	502	728	703	740	494	649	656	642	720	547	552
DNTAG0005	503	924	423	587	505	484	747	501	511	506	713	1107	626	508	721	595	946	715	552	611
DNTAG0006	546	713	382	515	479	463	604	323	462	501	624	656	561	591	623	591	553	584	581	664
DNTAG0007	0	0	0	0	0	0	0	0	0	0	0	0	0	0	1	0	0	0	0	0
DNTAG0008	655	529	425	521	546	558	358	543	366	457	802	553	631	451	706	612	514	669	471	668
DNTAG0009	786	540	836	771	598	608	551	796	720	612	801	576	814	606	805	812	514	769	567	705
DNTAG0010	479	751	412	639	624	582	604	370	496	551	827	625	497	508	639	504	557	439	592	399
DNTAG0011	727	620	539	613	692	506	688	595	499	781	793	625	731	600	681	731	561	792	659	608
DNTAG0012	735	738	655	416	0	601	603	672	337	0	773	673	563	610	0	769	537	657	552	0
DNTAG0013	593	488	556	596	0	486	566	592	515	1	875	775	880	607	0	907	689	1045	625	0
DNTAG0014	706	461	332	493	0	587	486	461	462	0	828	676	623	575	0	737	595	699	541	0
DNTAG0015	478	471	381	530	0	434	405	345	464	0	686	671	439	575	0	531	619	433	545	0
DNTAG0016	654	521	552	595	153	526	485	618	522	115	779	791	585	470	223	740	589	684	504	138
DNTAG0017	546	431	425	495	0	471	320	510	446	0	812	578	501	380	0	638	545	648	432	0
DNTAG0018	543	539	503	463	0	526	400	574	286	0	686	627	560	454	0	405	456	633	455	0
DNTAG0019	565	335	501	417	505	443	213	516	342	541	644	474	565	438	662	624	317	688	470	675
DNTAG0020	609	606	586	565	543	482	518	536	457	640	646	681	543	475	746	633	596	614	476	717
DNTAG0021	640	475	542	488	520	530	351	602	458	601	753	433	684	436	713	665	308	697	412	753
DNTAG0022	617	448	510	449	479	343	512	478	381	372	718	600	485	516	483	547	439	550	493	540
DNTAG0023	565	511	595	583	0	474	451	631	460	0	732	636	614	613	0	410	504	680	576	1
DNTAG0024	621	490	0	593	629	570	360	0	552	657	619	486	0	594	637	549	327	0	645	608
DNTAG0025	1066	965	787	1290	896	844	960	791	1043	909	1507	1624	1420	1315	1229	1241	1381	1320	1302	1011
DNTAG0027	429	430	396	433	444	343	361	445	350	393	480	606	520	369	511	443	516	514	425	458
DNTAG0028	483	420	482	564	520	455	392	551	455	470	637	555	556	404	600	480	444	614	408	414
DNTAG0029	734	524	302	636	711	505	461	269	531	729	738	646	329	464	725	723	528	267	471	505
DNTAG0030	789	420	0	491	560	619	305	0	427	542	691	411	0	423	624	506	387	0	503	634
DNTAG0031	138	210	203	192	227	249	187	272	47	189	349	295	226	194	262	44	303	310	213	361
DNTAG0032	497	567	0	583	540	381	533	0	446	607	519	578	0	487	660	455	492	0	482	588
DNTAG0033	543	633	556	380	518	481	516	678	348	601	642	575	591	404	685	519	480	729	391	606
DNTAG0034	609	500	340	326	479	525	363	252	287	476	867	522	364	381	568	604	456	285	350	517
DNTAG0035	666	570	473	459	0	491	472	482	429	0	704	655	545	486	0	653	563	610	535	0
DNTAG0036	731	612	471	538	0	549	506	553	462	0	735	767	681	556	0	598	670	736	523	0
DNTAG0037	495	947	51	709	550	409	732	14	508	638	705	1400	613	517	708	444	1123	441	528	661
DNTAG0038	547	548	0	436	475	454	481	0	402	532	621	690	0	513	658	515	609	0	517	651
DNTAG0039	99	57	137	148	129	172	40	186	19	89	173	89	104	87	151	11	63	192	123	205
DNTAG0041	706	651	468	495	550	529	649	505	508	550	685	661	550	450	615	607	600	581	478	527
DNTAG0042	531	389	540	472	651	433	448	420	431	670	554	572	415	429	617	466	517	278	422	560
DNTAG0044	741	776	576	562	512	588	630	596	504	577	751	694	633	459	583	611	624	690	496	704
DNTAG0045	563	486	0	380	510	517	483	0	334	449	613	585	0	474	553	501	552	0	437	494
DNTAG0046	596	675	362	433	597	525	578	330	373	613	672	687	447	530	679	583	551	324	550	691
DNTAG0047	630	535	490	442	562	570	471	597	332	572	722	628	558	476	619	480	604	675	535	602
DNTAG0048	638	0	412	573	518	605	0	506	465	564	746	0	648	513	683	645	0	710	458	661
DNTAG0049	619	591	843	711	642	502	468	959	702	663	701	858	1254	521	698	560	780	1288	611	668
DNTAG0050	578	453	0	432	166	454	359	0	363	92	628	619	0	430	361	527	543	0	457	170
DNTAG0051	458	467	560	402	510	455	360	578	354	551	454	540	709	396	570	345	443	787	389	503
DNTAG0052	584	512	746	573	588	493	434	815	454	692	580	600	785	408	686	527	507	752	420	635
DNTAG0053	671	491	558	517	551	555	438	658	408	579	491	586	564	424	586	353	515	597	445	492
DNTAG0054	9	20	27	33	39	26	14	34	2	15	40	26	28	30	35	1	52	33	32	67
DNTAG0055	720	415	566	474	583	587	386	658	397	591	664	515	528	421	576	546	450	623	414	517
DNTAG0056	635	330	533	409	560	458	176	565	383	604	615	382	641	404	612	390	253	663	413	575
DNTAG0057	782	534	538	484	559	662	324	467	394	652	671	612	579	610	640	593	496	564	539	613
DNTAG0058	744	570	617	415	550	602	416	610	306	527	838	644	674	473	663	807	477	683	546	513
DNTAG0059	608	350	185	0	504	534	291	121	0	547	650	491	255	0	652	453	429	152	0	585
DNTAG0060	615	489	385	504	532	451	432	412	451	578	734	705	552	532	681	543	606	578	527	594
DNTAG0061	294	242	230	408	354	414	179	304	67	256	614	345	329	294	355	37	401	457	355	453
DNTAG0062	558	417	0	374	503	322	430	0	334	567	524	490	0	431	608	556	479	0	539	470
DNTAG0063	592	478	492	494	118	532	467	505	428	85	603	590	597	458	178	569	496	643	520	106
DNTAG0064	709	474	541	458	556	591	381	612	458	651	631	594	592	400	641	548	510	680	406	584
DNTAG0065	456	639	507	543	567	226	576	532	493	634	477	809	615	479	683	291	552	650	447	658
DNTAG0066	0	433	439	422	580	0	333	522	348	593	0	498	537	384	613	0	456	570	382	582
DNTAG0067	460	430	453	345	445	436	365	489	312	504	507	444	631	360	489	419	483	635	359	420
DNTAG0068	444	446	477	333	652	291	398	499	290	689	383	450	508	402	646	233	379	495	406	740
DNTAG0069	661	511	445	411	626	596	388	539	350	621	712	613	558	554	728	541	551	595	499	680
DNTAG0070	569	376	404	355	374	393	227	460	280	323	530	380	551	343	436	380	336	524	351	332
DNTAG0071	494	465	426	466	541	502	241	577	355	575	558	663	565	408	686	375	481	726	499	680
DNTAG0072	242	0	368	274	294	353	0	323	127	240	509	0	411	260	382	185	0	507	313	406
DNTAG0073	682	582	459	725	1277	592	397	547	578	1245	760	719	696	546	1102	511	629	830	513	1063
DNTAG0075	660	482	492	375	509	482	458	456	377	538	577	618	494	454	546	438	525	579	423	501
DNTAG0076	539	497	546	434	668	529	453	485	356	695	561	597	530	492	622	409	529	434	482	595
DNTAG0077	558	592	441	527	541	414	519	555	449	585	632	724	541	517	667	511	544	635	503	592
DNTAG0078	520	424	675	353	427	465	381	556	304	475	540	523	478	339	541	428	449	578	274	550
DNTAG0079	2	3	0	3	5	9	0	1	1	3	5	2	1	1	1	0	2	3	2	2
DNTAG0080	501	417	518	440	0	515	365	571	318	0	651	541	581	491	0	332	520	601	492	1
DNTAG0081	596	402	550	443	563	553	341	523	352	585	607	528	608	462	733	420	395	728	512	610
DNTAG0082	1	488	350	388	556	0	460	361	324	492	0	648	431	469	667	0	582	450	426	507
DNTAG0083	469	413	0	405	363	478	358	0	364	314	548	557	0	377	463	431	466	0	360	359
DNTAG0084	554	510	406	539	723	431	459	475	341	690	699	781	602	516	870	415	673	696	448	775
DNTAG0085	528	616	408	661	813	489	661	476	530	957	876	589	830	552	806	618	498	802	530	764
DNTAG0086	629	567	473	622	558	567	603	349	533	488	810	774	819	460	779	684	594	453	493	551
DNTAG0087	588	604	0	590	0	518	510	0	540	0	673	678	0	507	0	618	570	0	441	0
DNTAG0088	404	471	259	476	665	407	308	193	438	662	501	429	247	460	746	383	334	136	461	672
DNTAG0089	677	543	370	450	70	514	477	344	395	19	753	633	384	451	101	599	509	321	439	38
DNTAG0090	446	319	521	398	526	432	260	520	336	523	584	422	509	441	684	404	240	572	366	625
DNTAG0091	701	0	453	509	663	571	0	512	486	689	800	0	589	581	888	651	0	667	541	676
DNTAG0092	456	537	600	537	781	218	565	671	403	845	445	748	647	495	1064	217	646	847	587	998
DNTAG0093	712	959	1	458	789	553	920	0	488	872	774	1255	0	461	729	637	1095	1	470	827
DNTAG0094	788	601	0	547	755	605	575	0	489	923	779	744	0	452	727	739	537	0	453	754
DNTAG0095	598	606	0	596	678	536	560	0	471	653	754	775	0	502	729	592	626	0	533	627
DNTAG0096	594	0	998	597	1348	438	0	1167	594	1399	782	0	1630	516	1626	788	1	1551	513	1491
DNTAG0097	5	568	439	364	585	0	527	551	319	536	0	766	903	646	668	0	619	964	593	560
DNTAG0098	646	718	503	0	0	528	611	534	0	0	955	845	652	0	0	816	708	762	0	0
DNTAG0099	665	569	499	512	524	558	553	616	528	508	958	731	738	534	675	884	609	745	546	548
DNTAG0100	560	538	407	608	620	444	585	465	532	700	717	621	715	574	911	668	564	711	547	762
DNTAG0101	608	0	432	605	511	467	0	411	457	460	668	0	679	480	621	562	0	677	458	570
DNTAG0102	602	540	501	403	0	509	441	475	380	0	634	561	788	423	0	539	422	765	420	1
DNTAG0103	5	20	28	52	0	25	22	42	2	0	43	21	38	13	0	3	23	67	26	0
DNTAG0104	594	510	513	613	0	456	488	550	429	0	727	646	625	592	0	579	606	688	538	0
DNTAG0105	710	609	491	862	0	596	529	516	779	0	788	632	660	618	0	778	536	700	606	0
DNTAG0106	845	651	282	647	0	787	613	240	529	0	813	634	333	663	0	728	540	301	625	0
DNTAG0107	707	545	470	474	2	615	374	486	375	0	516	534	578	530	0	441	497	559	522	0
DNTAG0108	752	548	637	0	568	610	546	621	0	393	719	631	771	0	646	675	509	688	0	285
DNTAG0109	490	453	379	382	484	477	479	410	375	497	650	557	635	523	681	577	488	626	545	721
DNTAG0110	609	0	553	396	0	511	0	590	328	0	699	0	754	550	0	590	0	741	535	0
DNTAG0111	551	346	565	857	429	494	322	657	701	442	683	575	649	586	671	595	441	743	577	642
DNTAG0112	574	433	578	538	732	498	377	634	532	733	783	498	506	512	806	619	445	621	486	633
DNTAG0113	578	378	245	503	526	482	269	186	407	605	580	427	397	460	734	514	299	319	454	651
DNTAG0114	186	653	575	290	514	338	431	602	201	710	308	716	426	288	862	177	627	695	191	757
DNTAG0116	439	418	494	543	0	512	232	516	443	0	659	359	570	394	0	420	259	665	380	0
DNTAG0117	606	0	0	498	518	448	0	0	345	471	727	0	0	440	608	635	0	0	402	617
DNTAG0118	515	441	421	534	336	441	384	485	479	372	439	481	464	382	426	451	439	511	400	404
DNTAG0119	511	475	476	567	523	409	439	521	552	579	569	597	583	552	627	530	572	607	536	529
DNTAG0120	1	468	338	427	603	0	473	355	418	587	0	653	450	598	614	0	619	386	535	527
DNTAG0121	471	497	481	612	506	412	459	577	566	498	746	731	803	540	651	559	551	896	576	645
DNTAG0122	496	458	487	521	494	461	473	583	488	588	628	673	565	543	595	524	585	602	565	632
DNTAG0123	366	373	373	657	383	388	282	489	551	417	487	514	446	496	439	386	419	525	387	476
DNTAG0124	574	474	554	609	460	482	469	571	600	437	732	671	620	457	528	675	448	684	493	465
DNTAG0125	529	563	544	499	511	509	496	505	464	526	647	526	501	404	607	478	371	490	382	536
DNTAG0126	622	478	497	347	492	487	466	548	358	566	609	584	506	395	576	434	495	585	342	593
DNTAG0127	598	642	630	437	631	522	599	694	399	652	684	575	664	469	700	599	489	731	524	610
DNTAG0128	318	362	0	235	276	198	355	0	225	341	366	347	0	288	355	261	335	0	190	368
DNTAG0129	460	728	464	447	512	435	605	526	374	501	552	673	549	368	635	406	591	686	433	549
DNTAG0130	568	0	548	548	489	483	0	666	468	542	676	0	751	629	576	736	0	782	590	492
DNTAG0131	508	481	378	628	531	495	522	378	516	603	577	628	602	610	611	474	477	504	509	541
DNTAG0132	477	516	444	530	552	306	414	472	478	575	600	764	684	666	709	419	494	812	596	662
DNTAG0133	500	498	498	449	464	413	469	551	423	565	636	635	820	493	663	570	628	853	502	570
DNTAG0134	624	322	549	465	698	504	260	567	413	666	680	354	597	521	730	489	350	681	531	607
DNTAG0135	554	432	720	497	561	391	448	653	430	535	578	629	619	541	641	479	553	579	469	561
DNTAG0136	0	397	485	492	726	0	401	486	476	647	0	576	501	440	634	0	545	545	462	627
DNTAG0137	654	737	386	631	413	519	615	383	523	320	657	628	383	450	468	602	435	334	427	315
DNTAG0138	599	548	452	463	544	399	421	538	403	636	571	543	541	386	642	544	509	522	401	642
DNTAG0139	599	0	467	448	609	532	0	604	382	618	599	0	538	391	606	532	0	603	390	557
DNTAG0140	431	553	0	570	571	217	506	0	443	577	400	559	0	509	621	190	466	0	483	603
DNTAG0141	554	548	504	432	579	553	493	556	371	674	746	671	684	544	696	573	471	787	499	610
DNTAG0142	0	550	462	428	531	0	537	467	408	582	0	684	489	489	650	0	591	605	458	587
DNTAG0143	401	569	493	504	559	328	517	526	450	653	443	708	634	485	654	363	617	636	466	761
DNTAG0144	361	484	136	442	518	329	317	115	357	527	547	623	313	552	646	309	576	203	569	644
DNTAG0146	597	433	507	452	534	551	391	621	404	563	593	560	695	498	617	570	401	882	531	569
DNTAG0147	666	534	535	510	738	586	425	532	443	811	721	630	684	476	762	639	438	710	430	743
DNTAG0148	503	259	496	590	575	438	202	541	526	650	536	384	503	429	735	408	230	517	517	716
DNTAG0149	526	411	182	750	575	439	345	144	617	616	463	465	204	572	628	436	349	117	497	559
DNTAG0150	653	0	0	659	441	573	0	0	429	509	728	0	0	517	638	398	0	0	369	570
DNTAG0151	496	475	609	369	559	488	453	587	324	652	570	464	743	476	591	509	503	687	435	619
DNTAG0152	0	340	414	353	601	0	389	441	316	604	0	499	513	363	578	0	419	525	331	573
DNTAG0153	680	490	504	432	603	620	356	527	278	526	666	576	624	386	682	435	488	633	430	640
DNTAG0154	537	0	363	1107	603	414	0	268	902	665	571	0	375	1397	728	399	0	272	1140	617
DNTAG0155	672	0	0	503	0	504	0	0	408	0	599	0	0	586	0	439	0	0	489	0
DNTAG0156	775	553	376	502	468	645	427	402	436	519	850	782	619	510	696	700	672	701	524	629
DNTAG0157	366	443	378	514	648	329	348	428	436	676	453	638	603	437	788	372	597	550	444	624
DNTAG0158	652	421	456	507	486	518	431	536	418	518	682	528	605	497	618	638	436	657	613	573
DNTAG0161	581	611	0	454	441	460	513	0	459	523	518	638	0	408	452	425	553	0	434	490
DNTAG0162	503	0	340	441	102	468	0	425	375	81	441	0	432	355	85	364	0	500	325	37
DNTAG0163	549	0	493	493	584	556	0	600	404	660	560	0	574	510	670	538	0	693	380	630
DNTAG0165	706	113	495	406	452	603	76	621	395	442	684	178	593	550	577	731	97	600	549	545
DNTAG0166	308	359	406	322	374	202	386	424	306	386	344	546	481	431	482	183	477	487	358	466
DNTAG0167	832	458	467	685	487	646	432	443	568	537	882	588	611	561	571	782	531	648	571	649
DNTAG0168	657	474	390	1090	596	571	450	426	1038	693	770	798	748	1107	969	766	656	794	1075	781
DNTAG0169	0	70	185	221	251	0	30	238	38	202	0	95	221	150	283	0	89	285	164	412
DNTAG0170	2	65	433	0	533	0	33	400	0	625	0	156	552	0	740	0	67	521	0	746
DNTAG0171	534	0	516	471	545	449	0	530	409	581	595	0	442	498	644	414	0	478	438	583
DNTAG0172	678	474	495	450	1243	652	445	509	385	1343	675	510	447	445	1497	545	446	646	377	1326
DNTAG0173	564	485	465	542	506	436	471	523	511	575	579	608	643	514	677	527	531	637	508	635
DNTAG0174	331	372	507	475	454	259	334	556	399	473	353	423	575	439	562	213	288	637	479	518
DNTAG0175	656	533	465	511	549	500	505	612	471	546	615	813	568	542	642	606	664	580	472	542
DNTAG0176	511	462	328	518	616	457	358	372	396	582	463	573	474	462	638	290	477	478	438	664
DNTAG0177	2	483	537	491	603	0	445	610	423	603	0	629	554	483	680	0	588	648	541	635
DNTAG0178	552	391	456	461	621	504	328	481	434	643	628	505	472	463	705	544	387	427	454	644
DNTAG0179	131	506	0	502	506	310	461	0	347	514	447	664	0	428	720	128	556	0	446	589
DNTAG0180	648	488	397	542	470	547	467	452	483	489	823	694	719	618	749	710	691	820	605	604
DNTAG0181	730	0	0	0	0	643	0	0	0	0	851	0	0	0	0	737	0	0	0	0
DNTAG0182	350	560	496	647	0	235	604	506	505	0	397	595	624	464	0	211	534	717	449	0
DNTAG0183	585	601	0	557	608	487	528	0	417	616	702	514	0	470	729	556	547	0	472	616
DNTAG0184	533	601	0	457	0	398	584	0	455	0	617	770	0	459	0	574	607	0	501	0
DNTAG0185	690	609	415	497	564	578	545	476	439	664	783	646	542	533	778	641	630	584	568	731
DNTAG0186	639	645	568	433	360	511	506	599	380	264	736	686	581	403	541	631	567	633	504	287
DNTAG0187	550	495	522	630	639	423	553	512	553	636	683	694	530	979	715	596	545	603	885	732
DNTAG0188	652	221	514	738	653	743	208	566	498	557	943	194	673	601	828	662	188	725	695	616
DNTAG0190	614	0	501	646	689	493	0	466	411	654	744	0	566	498	763	460	0	520	453	682
DNTAG0191	341	492	29	559	222	163	492	22	470	209	341	748	32	475	87	146	635	24	504	67
DNTAG0192	636	584	325	725	565	436	602	305	593	621	766	865	601	717	478	715	755	466	747	470
DNTAG0193	641	256	419	441	0	527	205	441	372	0	881	307	862	575	0	743	200	717	544	0
DNTAG0194	624	329	589	193	506	557	217	591	117	498	815	365	822	319	692	624	248	775	180	614
DNTAG0195	610	500	438	465	417	495	412	505	459	426	856	728	640	609	374	823	597	785	535	378
DNTAG0196	517	519	499	453	267	451	461	525	397	200	833	600	682	563	249	696	485	672	550	125
DNTAG0197	579	582	524	625	250	484	642	538	518	233	856	662	663	548	265	708	598	754	558	191
DNTAG0198	475	559	480	503	420	456	490	605	410	412	621	658	626	473	442	498	545	709	471	377
DNTAG0199	399	421	293	407	446	398	336	298	284	483	675	467	437	355	547	443	377	328	364	566
DNTAG0200	535	573	426	469	530	491	580	428	396	547	722	666	545	552	783	624	557	489	452	695
DNTAG0201	510	565	1	571	108	464	403	0	438	67	571	532	0	549	255	364	441	0	499	115
DNTAG0202	195	318	603	845	504	172	290	666	725	575	240	332	684	618	713	245	225	693	589	682
DNTAG0203	620	723	576	527	0	546	701	628	519	0	678	747	699	509	0	682	628	684	574	0
DNTAG0204	216	0	471	466	670	100	0	581	443	740	248	0	635	670	802	94	0	732	662	720
DNTAG0205	197	406	465	697	704	81	324	487	624	738	342	1056	712	754	942	143	983	726	665	886
DNTAG0206	474	281	462	652	528	275	235	550	499	507	710	456	703	625	559	458	305	781	508	471
DNTAG0207	556	487	610	651	449	471	434	645	614	462	651	730	694	581	568	612	608	762	563	452
DNTAG0208	544	0	379	554	524	472	0	454	499	567	705	0	530	462	643	640	0	474	451	560
DNTAG0209	535	274	500	749	565	385	226	550	629	607	550	327	582	541	612	494	195	621	465	641
DNTAG0210	643	572	283	400	560	545	485	291	321	568	691	548	394	419	656	614	379	378	404	633
DNTAG0211	589	509	0	431	485	467	353	0	330	464	656	537	0	394	568	451	431	0	307	458
DNTAG0212	469	505	521	491	589	389	436	586	370	671	588	519	496	425	689	420	457	609	389	711
DNTAG0213	559	0	387	404	544	490	0	351	266	592	583	0	479	348	797	395	0	437	353	646
DNTAG0214	543	492	575	496	521	443	394	617	389	551	604	529	634	447	636	590	429	698	495	596
DNTAG0215	1	417	509	483	1015	0	403	545	436	1182	0	575	548	493	1253	1	422	544	460	1259
DNTAG0216	717	496	624	666	615	512	465	604	546	690	633	714	736	657	643	603	453	690	607	632
DNTAG0217	585	534	499	720	481	457	585	566	612	505	845	856	911	524	692	767	812	1025	525	615
DNTAG0218	157	473	455	493	464	459	390	495	291	470	678	666	670	366	666	187	469	768	488	576
DNTAG0219	572	354	0	630	625	438	328	0	463	582	566	465	0	439	851	528	369	0	515	692
DNTAG0220	717	287	481	553	611	558	185	558	545	654	797	453	556	507	645	640	233	634	522	668
DNTAG0222	301	541	591	569	504	258	539	656	526	526	326	524	553	473	708	307	434	606	407	604
DNTAG0223	542	641	603	501	573	420	595	604	423	582	667	597	633	525	629	455	487	564	502	579
DNTAG0224	618	225	556	520	548	529	162	642	497	473	648	270	678	456	497	637	133	647	450	393
DNTAG0225	643	530	511	511	521	483	580	574	429	534	633	609	646	551	634	580	528	709	534	555
DNTAG0226	571	232	501	378	640	494	212	582	295	641	592	272	586	434	700	449	253	660	481	618
DNTAG0227	502	530	455	369	439	428	506	539	379	452	663	682	587	518	504	544	574	621	495	372
DNTAG0228	556	660	577	604	538	480	606	631	549	674	646	871	721	612	755	581	703	859	609	606
DNTAG0229	482	725	604	723	658	273	733	566	688	705	715	976	893	571	785	606	837	816	580	719
DNTAG0230	497	368	0	545	404	425	418	0	486	416	561	573	0	430	554	504	493	0	449	498
DNTAG0231	101	138	188	144	137	170	136	249	36	120	211	186	184	134	168	24	207	247	133	221
DNTAG0232	531	456	433	376	127	443	343	398	349	81	483	527	546	361	191	443	417	482	324	77
DNTAG0233	589	632	566	488	636	521	606	671	468	656	613	673	599	395	439	573	649	722	400	431
DNTAG0234	0	2	1	1	5	3	0	6	1	4	5	2	4	2	4	0	3	4	2	7
DNTAG0235	572	1	561	442	535	315	0	584	366	463	537	0	548	393	597	521	0	528	345	600
DNTAG0236	560	133	506	457	133	469	90	526	426	78	517	197	621	440	213	437	131	656	403	92
DNTAG0237	296	500	515	331	360	139	417	508	317	294	267	592	624	395	393	143	512	592	394	295
DNTAG0238	747	0	640	629	420	560	0	680	523	495	643	0	730	601	642	619	0	734	497	553
DNTAG0239	492	700	450	376	479	347	540	499	325	441	477	755	610	520	568	276	645	600	481	462
DNTAG0240	579	469	588	586	474	415	448	645	472	432	683	787	835	507	588	414	667	955	547	521
DNTAG0241	454	1	437	697	1003	414	0	490	587	930	645	0	559	561	1167	540	0	696	613	993
DNTAG0242	449	0	588	344	304	288	1	594	266	245	507	0	708	398	351	355	0	748	337	322
DNTAG0243	556	213	0	394	546	500	152	0	420	563	604	406	0	468	659	568	278	0	455	667
DNTAG0244	0	216	475	484	559	0	207	612	451	654	0	288	595	501	639	1	221	569	495	625
DNTAG0245	382	488	521	486	571	321	463	564	507	636	367	566	574	377	607	324	502	651	442	585
DNTAG0246	785	351	515	463	0	504	360	513	429	0	637	424	580	405	0	503	371	595	407	0
DNTAG0247	547	341	759	483	0	425	326	777	416	0	482	399	811	418	0	481	313	804	439	0
DNTAG0248	343	488	562	468	0	221	579	688	392	0	379	585	637	557	0	146	510	725	590	0
DNTAG0249	498	519	435	571	0	415	493	535	479	0	490	567	562	576	0	395	500	587	444	0
DNTAG0250	295	479	535	330	0	142	536	576	331	0	276	554	547	407	0	152	527	585	419	0
DNTAG0251	246	0	0	335	0	100	0	0	311	0	242	0	0	405	0	113	0	0	381	0
DNTAG0252	655	260	439	660	0	456	276	508	587	0	640	472	780	527	0	720	308	795	634	0
DNTAG0253	979	506	443	682	0	759	462	509	651	0	786	585	766	535	0	923	582	739	540	0
DNTAG0254	505	216	455	499	0	247	270	502	503	0	425	315	621	470	0	300	245	707	467	0
DNTAG0255	557	321	307	504	0	464	376	299	437	0	526	385	387	541	0	527	365	443	509	1
DNTAG0256	446	506	473	455	0	354	488	542	411	1	421	544	508	422	0	319	429	558	418	0
DNTAG0257	519	483	467	481	0	485	532	592	429	0	491	551	540	433	0	456	508	627	381	0
DNTAG0258	624	257	594	270	0	537	151	593	154	0	566	316	579	297	0	457	147	627	179	0
DNTAG0259	606	400	436	388	0	437	395	457	382	0	539	497	632	359	0	481	383	495	332	0
DNTAG0260	720	461	367	448	1	561	488	316	365	1	648	558	434	536	0	649	484	417	509	0
DNTAG0261	525	428	671	429	0	425	482	639	437	0	491	605	639	582	0	309	453	699	545	0
DNTAG0262	604	321	613	422	0	523	318	696	429	0	672	478	671	543	0	623	401	707	580	0
DNTAG0263	590	0	464	593	0	478	0	609	534	0	555	1	655	676	0	509	0	677	590	0
DNTAG0264	585	0	547	466	0	507	0	609	466	0	679	0	738	535	0	345	0	784	498	0
DNTAG0265	742	586	363	921	0	559	528	403	890	0	673	537	614	770	0	608	513	609	713	0
DNTAG0266	512	215	483	0	0	389	245	527	0	0	552	370	766	0	0	481	370	717	0	0
DNTAG0267	1	406	0	401	0	0	329	0	338	0	0	482	0	365	0	2	448	0	353	0
DNTAG0268	493	506	324	364	0	407	537	214	326	0	596	526	315	403	0	423	448	208	353	0
DNTAG0269	584	509	480	518	0	514	376	545	414	0	542	574	567	502	0	421	465	604	490	1
DNTAG0270	0	460	349	349	0	0	444	416	355	0	0	703	505	340	0	0	635	514	440	0
DNTAG0271	574	399	371	410	0	530	420	485	340	0	596	578	496	473	0	576	485	503	424	0
DNTAG0272	382	454	485	388	0	338	407	511	355	0	407	537	510	449	0	323	468	616	457	0
DNTAG0273	561	1420	516	421	0	421	1162	523	429	0	606	1681	584	511	0	407	1285	575	459	0
DNTAG0274	461	428	367	334	0	367	340	448	311	0	451	490	420	352	0	296	489	440	383	0
DNTAG0275	370	0	449	346	0	376	1	515	285	0	485	0	656	316	0	329	0	632	299	0
DNTAG0276	327	547	474	460	0	348	467	528	351	0	514	715	639	568	0	360	755	611	393	0
DNTAG0277	432	662	411	1200	0	350	556	353	875	0	540	491	687	1018	0	525	558	593	878	0
DNTAG0278	0	315	430	434	0	0	179	516	332	0	0	373	683	417	0	0	169	579	310	0
DNTAG0279	0	849	484	0	0	0	730	610	0	0	0	693	586	0	1	0	626	623	0	0
DNTAG0280	286	667	417	548	0	279	437	486	406	0	337	535	439	464	0	303	505	504	466	0
DNTAG0281	460	470	382	496	0	414	427	411	496	0	619	540	470	495	0	506	507	444	469	0
DNTAG0282	440	0	322	733	0	431	0	401	624	0	588	0	484	635	0	610	0	405	636	1
DNTAG0283	443	556	312	409	0	467	475	358	373	0	647	720	438	476	0	439	659	475	443	1
DNTAG0284	416	506	313	350	0	335	347	390	370	0	514	542	519	411	0	490	447	500	438	0
DNTAG0285	571	774	1002	532	0	478	618	1072	471	1	691	859	1463	493	0	672	807	1435	490	0
DNTAG0286	481	0	876	567	0	387	0	955	449	0	616	0	1044	469	0	455	1	1133	502	0
DNTAG0287	434	449	379	588	0	362	323	392	605	0	547	576	390	518	0	535	516	337	488	0
DNTAG0288	408	498	262	0	0	384	517	280	0	0	508	700	402	0	0	496	815	387	0	0
DNTAG0289	260	291	159	241	0	295	318	157	151	0	388	345	261	386	0	113	383	224	343	0
DNTAG0290	498	520	289	445	172	391	405	212	477	117	638	722	370	479	327	517	601	247	498	179
DNTAG0291	380	476	209	354	438	390	428	207	333	429	582	716	296	411	653	512	708	174	365	561
DNTAG0292	346	428	235	488	385	220	333	206	398	364	542	508	313	366	529	263	444	269	315	402
DNTAG0293	544	503	541	379	432	527	432	645	274	518	696	535	647	409	673	549	517	720	304	650
DNTAG0294	386	513	315	362	389	401	443	357	357	445	560	577	419	374	591	483	518	443	383	527
DNTAG0295	379	184	384	359	375	378	86	436	279	349	501	263	571	397	485	367	156	590	328	328
DNTAG0296	547	559	398	393	504	414	444	438	310	470	665	472	614	366	611	419	472	564	324	576
DNTAG0297	608	629	509	474	436	595	758	562	400	446	692	609	583	390	570	569	520	630	429	414
DNTAG0298	389	601	499	528	500	535	469	609	412	442	522	776	574	521	571	319	602	623	506	515
DNTAG0299	714	310	466	467	212	678	276	505	435	112	704	393	567	556	198	658	277	534	483	75
DNTAG0300	1043	419	655	486	971	870	243	766	473	948	783	498	814	648	940	630	304	926	675	891
DNTAG0301	551	254	0	531	190	436	145	0	510	130	740	388	0	488	237	573	225	0	510	128
DNTAG0302	400	395	423	425	403	394	395	361	482	453	482	642	419	349	495	415	566	503	301	459
DNTAG0303	537	496	439	454	611	390	388	503	362	604	751	682	566	369	686	614	542	661	376	640
DNTAG0304	636	664	0	556	465	496	641	0	556	448	756	741	0	499	565	611	602	0	431	489
DNTAG0305	553	340	502	448	490	512	329	520	423	526	601	438	556	444	683	528	333	634	376	619
DNTAG0306	568	638	505	435	682	524	460	586	344	751	637	679	570	409	786	484	530	638	421	696
DNTAG0307	556	587	488	459	491	398	582	585	470	653	722	582	556	467	638	601	485	569	411	635
DNTAG0308	541	559	535	448	510	437	546	571	347	531	552	589	605	471	580	407	485	607	426	504
DNTAG0309	229	571	533	386	456	466	547	641	234	472	655	568	593	367	591	160	422	750	388	486
DNTAG0310	466	586	624	445	539	419	590	634	351	643	519	666	664	465	730	530	496	783	387	692
DNTAG0311	460	155	513	526	327	373	97	575	483	361	524	436	578	490	406	427	301	625	538	315
DNTAG0312	574	473	440	0	491	410	620	502	0	458	686	715	650	0	571	668	560	750	0	535
DNTAG0313	483	227	0	582	416	415	110	0	506	517	696	574	0	536	548	734	276	0	464	590
DNTAG0314	519	0	0	387	531	444	0	0	352	559	499	1	0	395	582	449	0	0	323	520
DNTAG0315	431	603	0	529	0	304	605	0	459	0	422	679	0	379	0	430	620	0	392	0
DNTAG0316	649	495	1	525	552	434	497	0	451	478	602	524	0	473	496	559	501	0	375	538
DNTAG0317	476	539	0	512	622	422	402	0	405	559	512	553	0	410	547	403	490	0	383	505
DNTAG0318	560	578	0	428	666	496	645	0	414	691	508	580	0	482	661	590	488	0	458	695
DNTAG0319	450	632	0	414	767	305	734	0	401	732	454	646	0	390	725	310	538	0	410	579
DNTAG0321	478	525	0	394	465	413	588	0	332	534	540	553	0	472	644	412	463	0	477	604
DNTAG0322	281	558	2	413	513	188	606	0	365	516	326	670	0	404	631	237	627	0	445	598
DNTAG0323	240	0	0	424	509	89	0	0	445	384	380	1	0	468	481	265	0	0	460	555
DNTAG0324	1	537	0	484	572	0	501	0	462	454	0	725	1	606	577	0	629	0	607	588
DNTAG0325	434	277	0	496	272	321	288	0	260	278	425	535	0	399	284	166	461	0	399	337
DNTAG0326	671	397	0	454	524	401	426	0	376	464	725	566	0	451	592	688	471	0	490	578
DNTAG0327	258	436	0	495	559	212	462	0	479	542	295	512	0	413	589	240	493	0	436	547
DNTAG0328	564	311	0	481	690	498	276	0	420	729	508	360	0	416	862	499	272	0	421	704
DNTAG0329	577	827	0	529	700	449	828	0	453	780	575	667	0	385	777	532	605	0	432	666
DNTAG0330	574	0	0	580	649	518	0	0	483	674	680	0	0	508	714	557	0	0	541	619
DNTAG0331	2	413	0	517	524	0	377	0	432	581	0	437	0	489	507	0	352	0	389	490
DNTAG0332	0	473	0	431	512	0	469	0	366	570	0	456	0	412	588	1	456	0	493	599
DNTAG0333	0	0	0	303	416	0	0	0	208	323	0	0	0	313	431	0	0	0	240	334
DNTAG0334	771	588	0	494	511	607	576	0	469	552	694	651	0	516	630	555	523	0	529	481
DNTAG0335	240	0	0	425	505	130	0	0	399	579	270	0	0	483	627	115	0	0	425	602
DNTAG0336	0	700	0	554	566	0	576	0	470	665	0	846	0	541	729	0	675	0	503	750
DNTAG0338	296	438	0	398	491	157	354	0	349	526	316	519	0	418	612	185	459	0	462	573
DNTAG0339	484	285	0	400	252	443	283	0	321	304	508	399	0	373	340	432	254	0	404	330
DNTAG0340	649	499	0	483	560	350	428	0	353	506	559	579	0	401	623	438	519	0	435	546
DNTAG0341	671	518	0	499	708	548	466	0	452	760	565	594	0	529	726	512	511	0	435	652
DNTAG0342	572	543	0	473	574	526	475	0	446	648	517	575	0	402	695	555	485	1	371	605
DNTAG0343	495	522	0	461	778	462	326	0	338	797	571	538	0	406	767	310	523	0	384	730
DNTAG0344	597	481	0	453	513	536	398	0	363	546	596	502	0	402	602	528	468	0	426	612
DNTAG0345	1	2	0	0	3	4	1	0	1	2	2	0	0	2	2	1	1	0	0	2
DNTAG0346	694	428	0	346	439	662	326	0	392	531	689	542	0	490	565	532	531	0	436	609
DNTAG0347	505	403	0	448	519	474	390	0	391	540	669	667	1	483	704	510	571	0	486	694
DNTAG0349	609	508	0	0	0	524	358	0	0	0	689	616	0	0	0	503	578	0	0	0
DNTAG0350	683	476	0	503	1145	568	372	0	470	1123	622	602	0	536	1284	537	510	0	502	1213
DNTAG0351	546	525	0	416	0	521	486	0	395	0	528	624	0	408	0	561	515	0	419	0
DNTAG0352	729	570	0	431	0	568	481	0	320	0	546	652	0	345	0	522	603	0	335	0
DNTAG0353	612	455	0	403	0	521	434	0	350	0	591	591	0	459	0	495	637	0	422	0
DNTAG0354	588	0	0	365	596	529	0	0	481	591	618	0	0	421	609	474	0	0	394	538
DNTAG0355	712	336	0	406	551	565	239	0	306	613	620	443	0	406	667	339	302	0	415	623
DNTAG0356	511	0	0	222	466	451	0	0	165	457	589	0	0	240	617	539	0	0	141	465
DNTAG0357	852	492	0	463	417	722	548	0	442	340	877	699	0	529	505	737	658	0	501	339
DNTAG0358	645	504	0	420	663	546	447	0	426	731	638	730	0	507	781	527	571	0	547	725
DNTAG0359	513	487	0	587	564	450	443	0	515	561	611	752	1	552	756	548	621	0	545	778
DNTAG0360	682	621	0	603	583	528	581	0	597	646	790	878	0	710	826	730	756	0	728	756
DNTAG0361	0	623	0	583	0	0	394	0	453	0	0	622	0	553	0	0	530	0	528	0
DNTAG0362	679	544	0	673	1712	516	574	0	633	1809	757	659	0	593	1850	626	654	0	518	1715
DNTAG0363	333	454	0	358	346	244	349	0	275	158	320	498	0	300	312	217	471	0	284	167
DNTAG0364	68	112	0	105	108	153	101	0	17	64	192	117	0	77	146	11	217	0	128	211
DNTAG0365	625	336	0	569	621	614	250	0	404	624	725	477	0	526	749	727	235	0	555	743
DNTAG0366	502	420	0	430	525	356	346	0	313	478	563	508	0	469	685	335	293	0	418	568
DNTAG0367	540	518	0	383	596	483	569	0	347	592	528	763	0	208	674	504	717	0	223	610
DNTAG0368	497	518	0	391	671	417	497	0	369	761	436	731	0	429	693	354	614	0	432	698
DNTAG0369	504	0	1	573	800	450	0	0	452	886	583	1	0	601	841	448	0	0	569	827
DNTAG0370	524	0	0	476	538	353	0	0	435	523	515	0	0	518	582	468	0	0	477	539
DNTAG0371	459	538	0	624	784	356	484	0	589	774	690	719	0	542	739	540	733	0	648	782
DNTAG0372	516	0	0	376	457	295	0	0	328	442	569	0	0	475	511	497	0	0	389	599
DNTAG0373	1	1	0	0	5	0	0	0	0	5	1	2	0	0	4	0	0	0	0	5
DNTAG0374	728	594	0	1374	4162	590	403	0	1096	4143	814	678	0	1072	3676	581	499	0	1135	3668
DNTAG0375	421	235	0	613	1993	328	153	0	502	2054	597	390	0	523	2452	387	217	0	518	2383
DNTAG0376	750	310	0	646	538	555	219	0	592	524	807	467	0	534	766	645	297	0	485	721
DNTAG0377	216	124	0	276	106	296	106	0	90	65	430	218	0	260	128	98	219	0	244	100
DNTAG0378	347	272	0	520	591	501	166	0	335	576	744	376	0	557	831	213	147	0	532	761
DNTAG0379	399	529	0	561	742	383	393	0	477	761	638	654	0	532	787	426	500	0	508	785
DNTAG0380	309	281	0	482	501	305	245	0	484	409	481	447	0	461	479	373	342	0	443	441
DNTAG0381	559	12	0	677	974	512	2	0	575	1015	659	245	0	697	692	642	117	0	630	662
DNTAG0382	404	434	0	601	1102	289	380	0	417	1136	484	540	0	531	1680	270	406	0	483	1453
DNTAG0383	642	249	0	1213	381	567	186	0	1040	325	884	372	0	1128	517	752	184	0	1080	398
DNTAG0384	339	0	0	500	496	156	0	0	363	261	302	0	0	420	371	342	0	0	480	392
DNTAG0385	303	196	154	226	0	153	124	161	182	0	483	234	323	389	1	250	140	296	390	0
DNTAG0386	485	418	384	422	594	424	480	341	453	595	721	671	459	754	726	499	625	466	631	614
DNTAG0387	0	576	328	664	860	0	615	387	626	796	0	764	467	571	844	0	628	598	645	616
DNTAG0388	508	251	506	494	453	420	198	563	419	569	559	321	788	559	668	541	212	955	519	631
DNTAG0389	369	558	262	289	268	252	494	275	319	292	421	640	357	349	351	326	624	424	301	341
DNTAG0390	572	490	322	461	451	461	461	198	375	409	652	726	409	552	718	493	588	311	470	634
DNTAG0391	521	513	399	516	497	460	403	447	515	521	750	634	609	520	831	659	514	717	540	755
DNTAG0393	2	0	655	929	510	0	0	548	740	509	0	0	689	580	634	0	0	742	579	618
DNTAG0394	2	595	0	545	533	0	560	0	478	584	0	596	0	500	645	0	443	0	440	630
DNTAG0395	660	627	503	562	563	550	624	483	486	598	665	642	570	591	710	590	510	503	611	724
DNTAG0397	546	355	430	384	696	475	319	379	383	666	716	527	654	606	761	625	382	588	608	649
DNTAG0398	583	560	611	437	577	438	498	602	409	595	711	773	700	534	733	594	592	668	516	700
DNTAG0399	630	513	407	559	562	510	565	438	577	609	823	714	508	498	640	826	635	515	565	668
DNTAG0400	456	416	437	556	486	379	375	374	509	519	636	607	390	396	644	679	462	419	466	581
DNTAG0401	528	376	444	513	509	325	512	444	478	475	614	595	415	415	578	584	394	450	441	616
DNTAG0402	495	431	517	382	607	316	420	503	398	562	545	541	530	406	634	486	366	527	476	647
DNTAG0403	494	0	494	348	404	375	0	394	333	377	546	0	429	463	483	528	0	388	401	424
DNTAG0404	516	426	274	249	0	379	295	213	151	0	569	442	71	282	0	482	277	84	181	0
DNTAG0405	680	235	549	471	532	467	159	581	460	521	729	238	690	490	602	719	155	684	531	637
DNTAG0406	502	514	458	462	468	407	531	393	438	484	644	530	454	524	608	532	448	403	513	528
DNTAG0407	479	407	0	577	592	379	406	0	460	641	507	468	0	467	677	474	368	0	401	607
DNTAG0408	719	0	0	652	457	596	0	0	534	448	661	0	0	1074	496	527	0	0	1206	457
DNTAG0409	509	435	429	603	716	480	471	420	484	775	647	701	671	557	779	599	660	682	517	668
DNTAG0410	495	0	426	542	704	448	0	413	382	650	550	0	514	504	674	509	0	460	541	636
DNTAG0411	573	517	539	505	529	399	463	528	454	569	576	633	553	530	612	530	590	604	471	542
DNTAG0412	569	401	464	432	438	280	407	313	430	314	477	681	403	441	459	358	429	403	399	539
DNTAG0413	649	478	466	0	645	458	484	437	0	663	625	545	445	0	580	567	443	423	0	607
DNTAG0414	596	478	264	459	536	426	426	215	424	620	607	504	236	486	582	513	386	164	470	628
DNTAG0415	600	554	663	427	24	529	377	566	350	16	604	559	573	460	0	502	512	637	393	2
DNTAG0416	601	502	584	513	535	448	454	424	362	522	566	569	480	444	522	447	445	514	434	696
DNTAG0417	635	403	552	504	553	428	484	503	532	484	649	519	605	549	634	677	425	628	586	638
DNTAG0418	505	398	458	384	467	424	366	441	369	439	636	480	493	539	569	566	330	445	584	431
DNTAG0419	0	413	459	429	510	0	518	366	311	551	0	607	424	441	605	2	561	404	502	594
DNTAG0420	374	389	893	646	507	172	420	561	470	432	443	642	877	675	488	326	433	992	496	486
DNTAG0421	591	1	432	597	502	475	0	421	521	481	715	0	722	539	649	683	0	686	569	644
DNTAG0422	239	394	501	693	528	153	452	489	653	478	284	631	621	626	600	129	577	619	573	668
DNTAG0423	533	577	462	491	572	440	499	432	377	550	522	797	540	435	598	481	612	501	480	611
DNTAG0424	683	507	521	502	0	532	514	544	494	0	663	726	486	460	0	604	572	494	496	0
DNTAG0425	618	0	625	500	844	499	0	644	507	866	658	0	622	503	767	718	0	530	526	696
DNTAG0426	725	516	571	572	732	523	533	584	469	718	724	577	574	520	667	667	561	697	561	653
DNTAG0427	560	102	0	445	765	443	72	0	396	742	618	295	0	447	702	566	134	0	459	678
DNTAG0428	398	0	527	407	494	374	0	598	191	428	491	0	616	305	511	279	0	697	317	497
DNTAG0429	670	495	494	0	605	613	463	515	0	545	632	609	584	0	685	560	506	622	0	658
DNTAG0430	537	0	666	339	524	305	0	587	365	405	526	0	598	474	425	403	0	676	442	501
DNTAG0431	356	630	477	505	575	401	502	492	425	561	536	769	510	499	654	401	577	649	439	614
DNTAG0432	601	0	488	550	283	427	0	545	474	237	560	0	778	581	403	457	0	771	573	322
DNTAG0433	299	742	366	536	655	144	627	428	447	573	375	1193	464	535	672	145	1080	550	535	537
DNTAG0434	431	0	378	442	451	353	0	346	345	519	503	0	371	397	587	337	0	279	365	622
DNTAG0435	610	303	420	466	424	485	286	465	375	487	521	378	534	507	535	508	427	573	446	449
DNTAG0436	4	6	8	7	8	11	5	12	0	1	14	6	9	7	6	0	13	15	8	9
DNTAG0437	488	432	529	549	631	449	338	578	386	655	474	484	508	483	689	529	446	561	415	683
DNTAG0438	117	303	212	358	375	333	152	174	159	306	481	348	201	253	476	65	140	134	305	332
DNTAG0439	759	482	773	342	643	501	393	755	291	616	636	542	697	495	622	504	517	710	299	670
DNTAG0440	526	404	472	447	662	380	321	516	404	472	555	542	608	530	571	289	431	676	479	312
DNTAG0441	372	582	504	371	488	158	488	494	318	503	309	641	516	451	533	154	535	617	474	573
DNTAG0442	0	57	53	0	49	0	33	67	0	41	0	69	55	0	80	0	54	105	0	65
DNTAG0443	564	3	900	410	584	459	1	930	420	611	701	0	1493	468	717	580	0	1569	496	618
DNTAG0444	0	504	644	438	624	0	525	675	452	650	0	806	875	493	701	3	655	907	431	723
DNTAG0445	510	1066	651	409	815	403	1059	673	366	821	726	2056	1610	389	874	585	1672	1612	419	805
DNTAG0446	768	249	452	476	592	577	146	505	461	616	708	516	623	451	695	654	245	651	502	570
DNTAG0447	515	307	506	423	483	405	218	617	347	438	477	409	645	433	592	401	249	692	493	538
DNTAG0448	479	357	475	787	0	290	253	552	639	0	538	442	505	829	0	336	276	548	801	0
DNTAG0449	520	0	0	148	0	416	0	0	96	0	446	0	0	27	0	395	0	0	26	0
DNTAG0450	0	0	0	0	0	0	0	0	0	0	1	0	1	0	0	0	1	0	1	0
DNTAG0451	540	220	555	386	741	461	194	594	295	711	501	465	666	366	726	388	307	719	363	616
DNTAG0452	802	287	791	466	679	595	342	720	444	637	752	541	861	487	791	778	488	812	513	710
DNTAG0453	808	427	401	333	0	637	441	483	353	0	797	527	487	402	0	703	478	522	407	1
DNTAG0454	688	572	586	431	497	532	561	599	406	549	668	699	740	488	662	622	597	720	476	570
DNTAG0455	623	435	404	437	0	465	447	388	357	0	685	694	511	493	0	552	647	460	480	0
DNTAG0456	555	408	672	492	654	365	510	486	469	518	659	804	659	473	817	596	717	799	501	838
DNTAG0457	531	471	471	533	523	276	593	447	444	375	668	895	491	504	516	581	631	544	451	652
DNTAG0458	525	540	290	767	525	417	588	194	753	646	663	634	302	624	729	503	610	171	606	670
DNTAG0459	111	99	173	111	197	70	159	168	31	118	309	212	147	97	177	34	187	216	97	259
DNTAG0460	549	0	1170	444	521	531	0	1280	385	499	581	0	1174	437	560	449	0	1310	428	537
DNTAG0461	544	403	511	488	663	306	426	506	420	535	505	564	578	492	615	502	381	679	472	661
DNTAG0462	589	369	471	472	492	486	301	528	480	446	626	479	517	529	616	592	305	599	506	514
DNTAG0463	618	158	503	403	536	513	138	473	410	547	621	319	605	387	580	535	212	623	395	593
DNTAG0464	599	413	739	429	579	424	403	768	309	517	576	614	934	495	630	422	588	1087	473	578
DNTAG0465	658	121	0	429	707	546	134	0	436	756	628	225	0	477	928	609	200	0	414	906
DNTAG0466	582	461	418	423	0	458	372	421	374	0	587	543	484	447	0	512	477	542	423	0
DNTAG0467	647	444	424	344	0	517	381	411	244	0	712	670	532	307	0	632	623	472	226	0
DNTAG0468	463	449	677	492	532	327	450	649	399	464	626	720	1025	465	668	582	710	1005	492	613
DNTAG0469	579	917	1064	718	634	449	676	1264	550	650	609	1004	2000	699	622	437	1001	2230	607	633
DNTAG0470	602	151	0	492	578	334	178	0	408	425	464	549	0	421	524	607	375	0	376	607
DNTAG0471	599	530	730	690	873	478	524	867	596	977	687	595	725	543	945	684	525	778	523	875
DNTAG0472	626	560	0	473	1097	483	532	0	480	1147	740	705	1	499	1471	679	568	0	488	1318
DNTAG0473	382	312	481	479	0	248	319	515	429	0	689	429	559	515	0	592	336	589	513	0
DNTAG0474	430	505	379	561	0	306	353	351	483	0	509	556	460	654	0	404	411	414	604	0
DNTAG0475	568	520	1410	430	0	431	465	1380	373	1	701	584	1833	433	0	616	472	1797	410	0
DNTAG0476	1	527	234	459	0	0	460	209	392	0	0	593	73	474	0	0	539	50	431	0
DNTAG0477	317	85	163	300	0	203	52	110	255	0	338	228	162	285	0	282	100	120	251	0
DNTAG0478	0	41	0	97	0	0	24	0	2	0	0	72	0	32	0	0	29	0	67	0
DNTAG0479	91	0	372	600	0	44	0	331	563	1	0	0	517	584	0	0	0	485	645	0
DNTAG0480	236	0	0	432	0	166	0	0	327	0	368	0	0	464	0	161	0	0	344	0
DNTAG0481	341	423	586	359	857	140	319	561	374	997	470	568	974	831	867	259	374	1021	768	908
DNTAG0482	192	525	442	573	654	85	459	467	453	756	237	717	750	692	683	93	671	711	705	621
DNTAG0483	54	173	127	183	207	57	186	131	66	152	157	227	204	199	246	15	289	228	228	327
DNTAG0484	238	551	425	673	495	152	433	450	509	537	347	599	636	537	704	136	502	660	640	718
DNTAG0485	472	428	325	384	353	463	317	363	338	341	637	547	518	415	462	467	555	570	353	488
DNTAG0486	279	527	673	596	529	171	538	685	499	597	411	700	835	527	863	171	640	903	558	792
DNTAG0487	553	539	498	523	540	334	526	490	456	603	754	602	718	549	762	373	564	736	600	710
DNTAG0488	594	650	301	717	346	452	626	201	607	341	770	725	278	930	467	568	551	182	756	364
DNTAG0489	607	499	506	678	345	516	492	523	642	321	726	516	621	597	477	681	372	689	572	320
DNTAG0490	328	555	530	611	573	179	487	574	599	545	311	575	610	1076	651	174	462	710	940	548
DNTAG0491	469	647	260	485	477	373	672	286	441	384	479	671	36	567	447	292	516	42	583	373
DNTAG0493	527	897	375	416	477	503	882	476	339	455	607	1170	677	532	585	537	1079	681	459	518
DNTAG0494	479	563	605	576	652	350	562	617	523	686	650	779	585	529	726	426	696	624	529	644
DNTAG0495	431	465	0	639	585	239	633	0	558	695	485	767	0	515	817	368	664	0	563	727
DNTAG0496	469	506	456	529	559	444	430	488	538	553	623	564	544	454	661	604	494	561	415	550
DNTAG0497	468	525	435	392	462	442	496	485	335	459	652	607	534	394	615	538	533	556	399	530
DNTAG0498	628	593	540	450	526	498	602	554	415	621	652	660	689	536	726	568	540	687	547	677
DNTAG0499	587	461	521	504	0	385	464	581	464	0	673	535	596	523	0	395	464	666	443	0
DNTAG0500	602	593	0	429	582	442	469	0	347	620	617	569	0	390	678	601	458	0	445	618
DNTAG0501	0	482	502	359	361	0	404	464	289	343	0	342	463	397	418	0	246	482	344	340
DNTAG0502	553	417	513	675	0	435	488	577	560	0	653	549	588	516	0	530	514	736	522	0
DNTAG0503	703	571	132	593	847	592	587	102	548	924	750	710	158	605	869	599	649	120	639	673
DNTAG0504	535	530	665	427	750	308	425	740	341	912	397	664	854	205	788	214	558	856	255	718
DNTAG0505	489	313	0	550	491	406	387	0	450	507	676	494	0	544	616	615	449	0	535	530
DNTAG0506	246	270	359	362	323	214	212	329	219	314	328	328	368	284	366	109	412	363	255	407
DNTAG0507	1	496	347	537	747	0	430	266	473	783	0	540	295	529	752	0	544	193	487	629
DNTAG0508	738	589	563	552	583	506	514	585	554	597	606	768	604	461	660	676	556	610	489	643
DNTAG0509	462	583	530	429	505	285	476	652	300	556	586	579	540	417	721	261	485	620	435	671
DNTAG0510	438	569	582	381	1032	333	519	600	367	1176	482	552	508	401	1400	327	508	531	394	1400
DNTAG0512	0	496	0	400	676	0	533	0	358	655	0	506	0	354	762	0	451	0	281	686
DNTAG0513	647	605	434	431	508	546	447	535	362	549	715	580	506	464	655	592	480	563	446	593
DNTAG0514	456	564	408	404	682	365	456	440	352	688	470	624	500	482	710	386	567	512	464	650
DNTAG0515	395	536	440	639	576	331	502	485	570	637	475	652	648	559	611	358	603	682	554	626
DNTAG0516	531	657	533	585	589	529	559	542	498	611	669	833	748	719	675	665	720	859	636	527
DNTAG0517	559	702	553	552	457	459	581	598	434	459	600	744	696	456	631	448	571	816	465	591
DNTAG0518	567	468	439	693	631	495	467	619	606	549	602	740	565	563	587	488	562	626	476	489
DNTAG0519	3	0	1	0	0	0	0	2	2	3	1	0	1	2	0	0	1	1	0	1
DNTAG0520	631	413	481	329	598	428	381	528	300	486	634	629	491	357	479	469	518	520	272	447
DNTAG0521	504	461	370	547	593	374	315	316	384	546	502	641	352	479	634	429	470	265	449	562
DNTAG0522	642	474	617	597	587	506	532	633	460	659	635	567	581	519	603	545	498	620	505	577
DNTAG0523	712	460	368	478	464	596	416	281	426	410	665	569	416	432	473	593	417	235	413	394
DNTAG0524	566	417	527	296	575	465	295	637	316	641	565	487	649	320	564	506	292	759	391	651
DNTAG0525	582	507	545	432	496	464	463	576	356	548	593	532	549	467	632	499	463	735	415	578
DNTAG0526	1	410	536	577	613	0	348	577	462	662	0	637	732	660	853	0	455	758	629	701
DNTAG0527	0	421	321	452	502	0	454	405	367	439	0	624	441	411	497	0	617	536	406	449
DNTAG0528	0	658	956	688	390	0	595	970	527	383	0	829	1041	676	465	1	655	1164	736	418
DNTAG0529	601	1123	562	687	590	570	1048	633	508	665	691	1487	874	557	766	551	1271	890	603	653
DNTAG0530	475	602	497	339	478	373	528	490	348	515	477	775	547	387	569	424	689	558	381	620
DNTAG0531	565	414	462	482	566	532	392	534	382	632	600	490	603	452	645	412	353	617	403	620
DNTAG0532	1	0	0	1	1	0	1	0	0	0	1	1	1	1	2	0	0	0	0	2
DNTAG0533	462	384	443	427	711	362	346	505	404	670	512	500	489	435	602	416	446	613	397	534
DNTAG0534	1	463	535	458	582	0	426	593	372	617	0	627	651	425	607	0	534	683	432	585
DNTAG0535	578	488	512	398	698	545	517	632	326	723	617	612	662	389	741	473	527	742	465	677
DNTAG0536	314	390	522	335	518	202	325	601	308	557	350	504	546	452	605	217	439	625	452	692
DNTAG0537	688	395	517	400	263	471	397	525	368	243	548	539	492	444	343	522	461	531	458	264
DNTAG0538	553	504	469	386	552	316	464	568	332	664	473	620	604	480	779	272	573	679	474	657
DNTAG0539	535	522	531	585	584	428	519	640	562	644	660	780	715	575	816	535	519	887	578	708
DNTAG0540	196	258	454	567	611	585	198	496	327	655	792	663	516	445	1159	137	380	665	538	898
DNTAG0541	656	409	467	446	0	374	489	577	404	0	746	605	726	481	0	652	499	779	496	0
DNTAG0542	2	442	444	345	369	0	356	445	281	320	0	481	596	460	470	0	416	671	419	303
DNTAG0543	557	468	324	512	631	481	431	288	348	640	606	632	322	451	711	371	472	337	444	640
DNTAG0544	395	419	509	516	670	267	375	565	439	669	457	515	600	470	643	350	493	640	515	693
DNTAG0545	0	713	508	490	713	0	637	624	440	681	0	683	653	377	569	0	531	726	398	585
DNTAG0546	0	409	493	528	584	0	355	501	486	582	0	485	570	564	650	0	363	636	430	592
DNTAG0547	0	398	546	441	614	0	309	536	349	608	0	475	654	465	549	0	469	762	375	597
DNTAG0548	0	484	544	433	661	0	480	513	396	628	0	572	572	527	794	1	486	654	508	613
DNTAG0549	1	0	0	333	509	0	0	1	312	535	0	0	0	334	755	0	0	0	303	645
DNTAG0550	0	0	541	356	523	0	0	630	320	556	0	0	720	475	689	0	0	717	475	554
DNTAG0551	558	600	510	457	706	496	510	581	426	663	520	572	467	479	705	504	452	479	457	532
DNTAG0552	0	456	532	713	479	0	597	577	631	434	0	792	899	656	781	1	744	899	619	587
DNTAG0553	0	557	510	816	584	0	506	601	792	563	0	714	682	615	598	1	590	749	620	480
DNTAG0554	0	620	425	467	495	0	493	537	408	548	0	641	561	445	581	0	587	579	533	554
DNTAG0555	2	406	22	435	451	0	341	10	392	489	0	435	404	419	612	1	426	303	457	595
DNTAG0556	0	546	479	315	399	0	508	509	315	456	0	610	478	376	578	0	589	527	260	600
DNTAG0557	0	116	983	518	408	0	49	1116	420	389	0	212	1148	444	448	0	111	1195	469	422
DNTAG0558	1	529	680	462	798	0	616	754	477	852	0	586	815	441	868	0	520	839	469	764
DNTAG0559	4	463	502	426	0	0	476	533	340	0	0	524	536	394	0	0	476	574	385	0
DNTAG0560	2	423	420	595	0	0	307	490	455	0	0	509	439	670	0	1	460	532	605	0
DNTAG0561	0	66	123	42	0	0	55	200	2	0	0	107	93	16	0	0	68	157	28	0
DNTAG0562	0	0	1	472	0	0	0	0	476	0	0	0	0	454	0	2	0	0	504	0
DNTAG0563	2	399	0	538	0	0	334	0	422	0	0	547	0	414	1	0	494	0	417	0
DNTAG0564	2	433	432	592	0	0	399	480	480	0	0	829	780	583	0	1	665	914	513	1
DNTAG0565	2	567	0	0	0	0	517	0	0	0	0	431	0	0	0	2	272	0	0	0
DNTAG0566	2	411	293	525	0	0	290	310	419	0	0	306	230	462	0	2	168	245	441	0
DNTAG0567	1	475	538	528	0	1	405	500	401	0	0	557	470	475	0	1	485	471	437	0
DNTAG0568	0	12	0	21	0	0	20	0	5	0	0	22	0	27	0	0	19	0	29	0
DNTAG0569	2	427	297	461	0	0	446	343	410	0	0	493	461	435	0	0	445	434	468	0
DNTAG0570	1	528	283	0	0	0	547	266	0	0	0	659	94	0	0	0	564	78	0	0
DNTAG0571	2	554	476	467	0	0	420	456	452	0	0	669	494	544	0	1	611	534	583	0
DNTAG0572	1	0	451	505	0	0	0	474	397	0	0	0	525	476	0	0	1	551	382	0
DNTAG0573	0	482	539	538	0	0	550	486	539	0	0	723	621	514	0	1	612	652	523	0
DNTAG0574	1	358	353	573	0	0	303	390	557	0	0	501	168	532	0	0	362	193	538	0
DNTAG0575	2	445	998	572	0	0	408	1016	402	0	0	603	1247	511	0	0	527	1220	479	0
DNTAG0576	2	217	483	0	0	0	204	396	0	0	0	471	756	0	0	0	304	759	0	0
DNTAG0577	325	260	0	463	853	505	208	0	407	979	670	352	0	617	908	415	146	0	551	850
DNTAG0578	677	0	0	499	502	524	0	0	481	557	802	0	0	539	704	749	0	0	558	700
DNTAG0579	633	480	465	599	445	493	411	516	575	417	706	820	631	769	572	786	718	695	746	387
DNTAG0580	579	696	534	649	528	532	671	568	599	591	706	741	602	535	737	661	669	608	484	684
DNTAG0581	703	375	429	389	427	563	351	476	339	342	853	477	525	391	512	787	353	593	382	565
DNTAG0582	557	351	478	387	481	514	248	554	335	452	763	457	593	503	717	721	291	657	409	691
DNTAG0583	496	295	312	479	519	433	241	275	436	516	757	365	391	473	738	635	252	242	544	642
DNTAG0584	591	313	712	507	514	447	223	768	407	546	688	417	1202	513	1040	599	268	1359	534	1058
DNTAG0585	0	0	0	359	0	0	0	0	229	0	0	0	0	146	0	0	0	0	131	0
DNTAG0586	605	588	522	566	658	539	666	587	543	740	768	642	558	410	849	676	591	613	537	779
DNTAG0587	623	0	415	444	685	551	0	429	434	743	721	0	543	438	841	604	0	526	445	769
DNTAG0589	328	173	333	532	590	251	124	362	481	566	495	69	722	460	658	336	35	702	520	557
DNTAG0590	458	550	0	574	544	346	451	0	497	526	569	718	0	608	746	547	576	0	569	690
DNTAG0591	542	0	0	753	846	474	0	0	648	829	693	0	0	603	798	624	0	0	580	721
DNTAG0593	536	597	0	773	622	501	519	0	550	594	581	530	0	589	703	486	500	0	583	613
DNTAG0594	585	629	434	435	291	513	545	455	406	228	637	627	437	449	363	676	557	363	469	236
DNTAG0595	1	159	494	439	486	0	125	567	411	478	0	176	625	422	602	0	90	672	468	519
DNTAG0596	662	567	514	455	0	473	539	587	453	0	646	669	653	462	0	438	513	644	442	1
DNTAG0597	647	1	453	359	735	495	0	458	270	722	711	0	490	445	784	474	0	465	368	611
DNTAG0598	390	0	493	215	655	225	0	431	131	686	325	0	450	268	704	150	0	461	130	641
DNTAG0599	513	0	0	448	535	435	0	0	281	543	593	0	0	451	624	465	0	0	405	579
DNTAG0600	960	0	0	652	469	760	0	0	503	507	860	0	0	633	540	684	0	0	619	500
DNTAG0601	535	0	483	671	470	551	0	624	453	534	737	0	765	476	695	429	0	901	493	639
DNTAG0602	721	1	520	413	470	531	0	469	385	485	777	0	566	404	610	629	0	537	394	603
DNTAG0603	678	0	110	516	302	547	0	62	422	259	694	0	136	410	389	652	0	95	387	263
DNTAG0604	676	0	530	715	685	609	0	574	527	739	748	0	580	562	707	508	0	567	537	698
DNTAG0605	576	0	515	540	629	479	0	571	530	756	612	1	495	515	603	461	0	543	433	660
DNTAG0606	481	0	345	431	685	420	0	207	340	708	521	1	378	415	763	418	0	151	393	602
DNTAG0607	544	0	541	420	1	498	0	572	360	0	544	0	582	471	0	495	0	602	385	0
DNTAG0608	545	0	0	450	474	473	0	0	409	536	566	0	0	446	624	451	0	0	441	597
DNTAG0609	473	0	383	306	480	407	0	364	282	465	515	0	385	406	541	464	0	303	331	560
DNTAG0610	325	0	198	370	453	317	0	164	259	477	387	0	244	413	558	199	0	159	433	473
DNTAG0611	316	0	568	434	584	235	0	662	404	646	485	0	682	484	707	357	0	760	431	575
DNTAG0612	610	0	354	697	595	489	0	315	550	609	662	0	569	731	665	571	0	452	623	599
DNTAG0613	451	0	0	495	528	365	0	0	494	496	657	0	0	488	661	529	0	0	421	568
DNTAG0614	429	1	278	358	385	370	0	282	314	450	455	0	473	425	522	420	0	372	350	452
DNTAG0615	130	0	373	454	672	225	0	422	252	695	417	0	493	390	722	61	0	495	431	601
DNTAG0616	209	0	97	345	0	282	0	44	110	0	407	0	91	287	0	65	0	56	240	0
DNTAG0617	461	1	390	398	656	413	0	368	414	601	486	0	399	434	696	439	0	312	381	518
DNTAG0618	530	0	364	469	568	485	0	266	421	625	549	0	305	417	606	428	0	280	373	576
DNTAG0619	691	0	627	457	684	572	0	659	431	812	551	0	644	488	684	617	0	697	483	697
DNTAG0620	569	0	559	449	563	529	0	596	378	653	619	0	577	432	596	513	0	680	462	567
DNTAG0621	593	0	492	338	557	530	0	365	297	597	631	0	530	417	647	517	0	410	385	594
DNTAG0622	601	0	445	381	509	483	0	556	373	542	626	0	547	471	615	556	0	612	441	548
DNTAG0623	694	0	241	431	746	553	0	222	391	769	731	0	18	447	712	641	0	15	551	668
DNTAG0624	619	0	347	603	319	537	0	301	495	192	756	0	622	562	351	691	0	458	576	235
DNTAG0625	930	524	0	1138	279	743	475	0	973	268	1132	664	0	948	492	842	569	0	976	372
DNTAG0626	467	0	354	414	461	388	0	362	367	448	530	0	507	430	544	458	0	425	386	514
DNTAG0627	611	0	477	489	558	529	0	467	448	605	546	0	538	463	613	477	0	488	426	635
DNTAG0628	438	0	557	474	573	636	0	518	377	602	658	0	506	404	594	364	0	539	465	600
DNTAG0629	526	0	439	627	547	488	0	490	534	639	491	0	499	538	648	491	0	524	472	632
DNTAG0630	631	0	497	474	648	520	0	455	383	586	561	0	401	355	649	484	0	327	352	487
DNTAG0631	635	0	358	461	608	513	0	292	398	669	591	0	289	443	637	510	0	202	406	670
DNTAG0632	435	0	494	360	459	418	0	457	372	420	517	1	436	477	469	392	0	485	439	359
DNTAG0633	611	0	486	420	612	589	0	476	326	642	608	0	434	409	652	575	0	368	466	690
DNTAG0634	620	0	267	354	499	589	0	270	301	467	583	0	347	391	613	452	0	323	433	632
DNTAG0635	610	0	83	498	430	511	0	33	474	430	704	0	163	592	619	558	0	70	568	574
DNTAG0636	566	0	386	540	532	497	0	347	406	549	671	0	613	483	763	533	0	561	494	720
DNTAG0637	550	0	786	614	582	433	0	713	606	631	640	0	742	582	723	499	0	693	605	733
DNTAG0638	358	0	121	337	604	349	0	90	274	562	461	0	8	331	633	307	0	7	341	585
DNTAG0639	580	0	491	469	519	675	0	482	322	570	689	0	494	455	583	318	0	501	431	606
DNTAG0640	563	0	0	472	0	475	0	0	298	0	487	0	0	379	0	302	0	0	339	0
DNTAG0641	441	0	0	470	668	346	0	0	353	698	445	0	0	500	681	234	0	0	485	690
DNTAG0642	621	0	38	484	274	560	0	18	412	163	619	0	0	466	288	454	0	3	469	115
DNTAG0643	551	0	555	429	607	428	0	493	315	603	537	0	480	458	598	296	0	420	435	623
DNTAG0644	766	0	559	414	783	704	1	597	352	707	765	0	625	430	721	459	0	654	431	653
DNTAG0645	600	0	446	353	0	500	0	432	281	0	554	0	489	339	0	423	0	433	356	0
DNTAG0646	531	0	467	424	503	494	0	476	353	531	560	0	499	462	703	545	0	521	470	624
DNTAG0647	539	0	379	498	0	460	0	487	398	0	572	0	610	461	0	566	0	618	491	0
DNTAG0648	503	0	429	658	420	445	0	443	426	367	635	0	583	555	520	380	0	650	495	497
DNTAG0649	557	0	639	699	861	439	0	661	557	1006	663	0	917	585	1283	544	0	864	590	1192
DNTAG0650	623	0	453	544	426	523	0	528	481	325	626	0	598	471	181	564	0	649	495	106
DNTAG0651	608	0	438	488	510	561	0	530	378	524	694	0	522	491	605	530	0	628	432	564
DNTAG0652	476	0	321	370	521	421	0	232	394	588	565	0	450	419	622	497	0	390	391	563
DNTAG0653	0	0	0	450	549	0	0	0	380	556	0	0	0	342	736	1	0	0	343	664
DNTAG0654	477	1	451	453	501	493	0	559	393	456	608	0	576	306	697	498	0	620	333	560
DNTAG0655	0	0	0	416	0	0	0	0	274	0	0	0	0	461	0	0	0	0	396	0
DNTAG0656	532	0	468	429	612	511	0	501	303	616	522	0	647	480	701	337	0	586	426	635
DNTAG0657	665	0	525	0	714	608	0	661	0	759	765	0	688	0	844	537	0	767	0	744
DNTAG0658	464	0	295	424	0	437	0	254	395	0	522	0	370	452	0	461	0	295	456	0
DNTAG0659	409	0	397	397	0	396	0	485	277	0	574	0	650	327	0	404	0	687	285	0
DNTAG0660	460	0	554	629	591	313	0	540	568	578	610	0	899	603	791	471	0	980	630	785
DNTAG0661	0	0	364	0	758	0	0	388	0	777	0	0	625	0	714	0	0	617	0	642
DNTAG0662	493	0	507	699	0	385	0	553	591	0	606	0	671	545	0	478	0	620	590	0
DNTAG0663	395	0	669	699	633	294	0	588	623	679	608	0	596	624	808	417	0	506	608	765
DNTAG0664	0	0	0	406	0	0	0	0	249	0	0	0	0	367	0	1	0	0	225	0
DNTAG0665	1	0	38	565	0	0	0	45	525	0	0	0	1	563	0	0	0	1	625	0
DNTAG0666	528	1	442	715	0	444	0	410	638	0	573	0	481	1048	0	509	0	419	1037	0
DNTAG0667	519	0	352	575	0	439	0	409	489	0	680	0	471	532	0	487	0	451	552	0
DNTAG0668	554	0	470	584	0	492	0	538	530	0	721	0	496	636	0	572	0	469	622	0
DNTAG0669	593	0	433	868	0	517	0	426	664	0	714	0	504	724	0	680	0	481	637	0
DNTAG0670	582	0	824	641	1	530	0	923	533	0	766	0	1294	518	0	738	0	1324	485	0
DNTAG0671	1045	0	0	674	0	1000	0	0	439	0	1720	0	0	568	0	1070	0	0	552	0
DNTAG0672	1000	0	0	624	0	808	0	0	587	0	1042	0	0	489	0	917	0	0	514	0
DNTAG0673	523	0	412	0	646	478	0	388	0	654	561	0	677	0	738	454	0	555	0	585
DNTAG0674	659	0	432	598	480	506	0	525	529	594	746	0	667	680	777	738	0	727	677	576
DNTAG0675	479	0	456	400	437	322	3	360	294	394	621	0	402	452	640	477	0	386	438	599
DNTAG0676	614	430	387	606	438	527	442	445	550	493	1001	538	546	478	631	822	397	560	422	602
DNTAG0677	682	382	513	380	586	500	412	534	363	603	554	383	566	382	714	803	357	643	434	588
DNTAG0678	618	566	538	443	536	476	435	528	423	610	891	593	619	439	736	688	632	716	470	703
DNTAG0679	712	428	563	559	538	640	426	683	517	558	923	486	671	570	726	872	393	747	534	672
DNTAG0680	647	582	539	443	289	540	476	612	349	229	661	554	645	384	189	570	490	696	393	117
DNTAG0681	309	591	0	499	326	146	535	0	385	292	309	608	0	430	444	149	491	0	391	340
DNTAG0682	655	576	0	438	1162	524	495	0	392	1113	659	648	0	428	1425	501	626	0	387	1211
DNTAG0683	641	0	765	519	457	515	0	785	522	365	643	0	1174	654	475	575	0	1220	681	379
DNTAG0685	505	893	490	508	441	457	836	591	507	495	677	1782	915	446	616	671	1662	851	486	488
DNTAG0686	474	484	430	640	474	438	433	579	595	495	556	651	578	553	604	614	605	684	522	533
DNTAG0687	623	499	428	529	0	500	461	469	424	0	672	690	553	401	0	686	570	607	412	0
DNTAG0688	29	346	114	198	158	175	94	182	21	327	324	511	123	123	213	65	125	261	455	487
DNTAG0689	633	599	479	397	533	552	490	573	360	545	723	613	621	423	583	684	592	658	449	558
DNTAG0690	518	584	582	473	513	431	571	645	393	613	594	613	616	501	673	564	554	632	466	681
DNTAG0691	655	562	546	528	0	614	344	555	364	0	782	598	664	425	0	465	489	766	436	0
DNTAG0692	560	708	521	539	596	473	653	606	403	637	580	664	598	494	814	552	585	639	437	686
DNTAG0693	599	641	0	640	471	538	544	0	492	495	649	649	3	566	573	532	492	0	553	456
DNTAG0694	340	365	345	337	246	359	354	460	130	145	501	468	385	365	275	185	418	448	357	259
DNTAG0695	185	223	222	244	238	218	159	317	59	182	332	286	311	231	281	71	337	386	237	363
DNTAG0696	374	351	413	462	424	343	366	456	155	362	542	511	486	532	429	66	515	686	522	542
DNTAG0697	513	846	550	536	565	399	986	587	523	650	594	627	848	591	687	567	562	978	645	653
DNTAG0698	492	437	0	478	448	392	463	0	462	456	615	676	0	429	522	615	638	0	437	617
DNTAG0699	401	418	643	0	634	306	535	642	0	610	466	552	614	0	708	434	587	746	0	718
DNTAG0700	582	518	724	0	594	460	429	690	0	582	601	615	566	0	633	543	555	629	0	640
DNTAG0701	656	703	599	546	515	464	663	672	455	531	630	761	613	493	635	535	567	654	512	496
DNTAG0702	789	470	848	430	1065	608	380	799	379	1182	736	537	708	470	1270	650	433	717	496	1186
DNTAG0703	767	722	615	605	707	541	789	643	485	737	858	1206	617	577	827	762	1042	712	529	670
DNTAG0704	561	642	465	516	538	475	636	591	463	586	530	623	557	552	689	585	626	628	526	655
DNTAG0705	295	262	537	200	278	160	373	303	196	220	254	321	312	258	309	166	402	349	262	309
DNTAG0706	204	0	0	464	0	126	0	0	368	0	230	0	0	538	0	119	0	0	549	0
DNTAG0707	649	702	0	509	692	535	633	0	509	738	670	851	0	569	842	603	700	0	553	665
DNTAG0708	576	630	624	588	624	530	469	741	414	626	696	766	790	672	648	486	825	876	682	676
DNTAG0709	544	933	0	389	391	449	912	0	365	493	557	1599	0	373	636	550	1358	0	420	519
DNTAG0710	319	34	423	448	462	241	20	513	355	430	423	33	515	416	530	183	11	641	460	574
DNTAG0711	0	543	527	430	653	0	405	617	333	678	0	522	596	327	733	0	531	656	341	736
DNTAG0712	193	486	564	516	649	105	468	596	428	685	211	663	568	454	626	80	547	590	436	556
DNTAG0713	2	505	486	451	581	0	405	576	370	559	0	533	513	393	550	0	490	556	422	566
DNTAG0714	595	632	524	438	674	470	636	602	388	721	572	648	583	389	633	515	566	600	387	626
DNTAG0715	597	0	731	419	471	568	0	778	390	508	654	0	884	448	613	514	0	857	444	434
DNTAG0716	807	583	545	419	637	700	595	701	313	672	715	633	694	451	685	709	564	744	459	655
DNTAG0717	611	728	551	538	743	510	809	674	509	758	612	893	655	591	876	570	714	752	599	724
DNTAG0718	493	567	601	460	504	404	585	675	434	526	474	654	797	509	643	434	546	765	516	610
DNTAG0720	559	532	1059	604	439	473	587	1453	485	452	709	834	2182	608	263	633	720	2359	617	248
DNTAG0721	582	0	701	0	553	465	0	723	0	570	649	0	970	0	574	677	0	941	0	588
DNTAG0722	660	572	527	447	236	619	551	591	340	263	681	694	641	413	359	672	611	767	476	242
DNTAG0723	475	328	615	519	599	531	230	638	378	560	586	349	669	398	650	353	245	678	449	646
DNTAG0724	279	171	225	0	236	255	130	182	0	184	350	238	241	0	340	135	189	267	0	211
DNTAG0725	310	434	518	322	593	419	342	610	166	640	526	589	613	296	683	204	441	671	183	565
DNTAG0726	662	547	525	548	621	532	463	576	426	663	643	518	647	435	661	529	475	754	439	547
DNTAG0727	640	463	534	434	821	606	386	592	310	789	548	494	592	453	824	410	465	676	453	746
DNTAG0728	692	485	728	351	572	496	413	647	357	511	589	575	817	480	582	578	483	760	467	513
DNTAG0729	729	561	602	435	298	612	425	589	349	224	724	726	647	472	375	554	552	606	498	233
DNTAG0730	578	391	513	410	492	450	373	549	267	474	568	566	558	433	578	358	523	619	441	626
DNTAG0731	617	453	443	504	548	491	368	532	431	572	828	620	644	473	842	723	545	729	489	728
DNTAG0732	50	449	518	939	794	11	404	619	833	859	48	810	839	838	1217	20	649	932	814	1121
DNTAG0733	534	497	571	576	706	524	446	659	504	817	653	546	652	466	704	525	446	835	504	760
DNTAG0734	540	515	502	446	333	508	417	510	317	273	629	609	713	510	395	445	539	734	504	295
DNTAG0735	366	569	593	586	654	215	545	576	474	678	357	620	522	562	727	142	519	587	418	576
DNTAG0736	673	655	538	539	678	649	551	542	482	735	573	776	540	541	746	609	616	557	579	671
DNTAG0737	343	361	343	308	480	339	295	409	239	429	376	423	368	316	436	248	361	418	296	448
DNTAG0738	531	444	494	439	541	417	391	493	370	555	616	507	550	350	537	475	454	527	327	535
DNTAG0739	603	536	616	363	548	525	489	680	315	622	580	607	750	393	657	508	504	816	419	601
DNTAG0740	647	527	586	446	569	633	467	661	396	557	594	600	602	477	637	540	514	796	435	583
DNTAG0741	594	418	477	0	494	494	416	436	0	426	534	452	474	0	457	467	439	489	0	360
DNTAG0742	289	332	238	0	494	337	232	283	0	410	466	431	306	0	592	107	424	325	0	621
DNTAG0743	607	429	415	0	507	443	425	450	0	587	579	662	647	0	720	631	659	629	0	753
DNTAG0744	704	509	494	786	1159	612	444	495	562	1081	840	973	755	639	1547	709	915	876	677	1311
DNTAG0745	534	620	0	604	526	485	516	0	454	463	682	688	0	418	343	476	604	0	442	252
DNTAG0746	640	0	453	536	407	623	0	574	453	404	700	0	570	483	568	522	0	654	535	416
DNTAG0747	614	410	0	468	585	573	332	0	386	608	603	490	0	489	659	578	350	0	549	623
DNTAG0748	605	529	331	469	917	534	474	240	405	831	635	620	404	411	903	602	495	327	478	781
DNTAG0749	0	0	68	14	210	0	0	68	17	177	0	0	34	10	276	0	0	58	16	218
DNTAG0750	565	425	243	467	738	451	406	205	411	657	578	579	283	520	818	554	481	229	511	745
DNTAG0751	591	432	420	287	0	484	362	264	224	0	587	541	380	256	0	531	537	290	276	0
DNTAG0752	667	413	633	391	0	495	329	560	371	0	593	484	651	437	0	504	371	559	398	0
DNTAG0753	655	429	502	493	0	477	344	589	467	0	662	550	655	509	0	598	417	716	530	0
DNTAG0754	560	0	338	546	0	489	0	358	479	0	597	0	364	465	0	579	0	435	450	0
DNTAG0755	462	601	520	562	0	477	512	634	515	0	652	789	901	473	0	656	712	968	524	0
DNTAG0756	638	423	425	676	0	466	390	411	566	0	748	775	588	674	0	695	505	620	651	0
DNTAG0757	0	0	0	0	0	0	0	0	0	0	0	0	0	0	0	0	1	0	0	0
DNTAG0758	643	289	411	542	0	519	148	454	496	0	731	339	677	433	0	610	164	660	471	0
DNTAG0759	601	288	0	542	0	544	210	0	563	0	683	420	0	481	0	598	246	0	387	0
DNTAG0760	613	0	0	763	0	450	0	0	647	0	677	0	1	621	0	532	0	0	628	0
DNTAG0761	1292	1123	1455	1057	157	1199	920	1659	952	198	1431	1330	2165	1009	181	1210	1012	2429	977	151
DNTAG0762	572	563	482	661	0	447	430	480	541	0	680	776	650	554	0	499	560	754	636	0
DNTAG0763	534	511	507	629	0	458	442	541	565	0	708	599	628	574	0	632	471	672	587	0
DNTAG0764	700	470	452	560	0	517	405	595	460	0	926	628	608	522	0	603	497	796	525	0
DNTAG0765	517	0	760	610	0	485	0	751	523	0	755	0	769	559	0	544	0	813	599	0
DNTAG0766	696	576	603	679	0	552	582	659	637	0	822	823	808	562	0	732	674	875	617	0
DNTAG0767	577	0	500	621	0	481	0	500	541	0	713	0	650	602	0	599	0	706	615	0
DNTAG0768	1547	643	928	773	0	1342	513	1009	646	0	1675	812	1327	668	0	1553	642	1584	669	1
DNTAG0769	653	920	0	345	0	587	769	0	324	0	1023	804	0	657	0	836	518	0	651	0
DNTAG0770	361	92	334	371	0	219	96	356	333	0	565	262	446	438	0	449	96	632	392	0
DNTAG0771	640	321	517	1	0	430	333	524	0	0	823	452	668	3	0	535	431	692	1	0
DNTAG0772	341	467	395	174	0	459	362	411	83	0	674	561	502	165	0	283	482	516	124	0
DNTAG0773	512	0	397	438	0	436	0	403	329	0	697	0	618	397	0	710	0	663	347	0
DNTAG0774	549	476	513	421	0	487	332	502	356	0	722	522	760	397	0	580	384	716	387	0
DNTAG0775	580	474	489	604	0	488	526	554	482	0	661	671	713	613	0	551	548	753	587	0
DNTAG0776	536	496	546	488	0	489	351	622	441	0	599	629	675	525	0	489	514	798	523	0
DNTAG0777	287	563	462	460	0	158	517	482	420	0	329	557	605	531	0	160	514	687	546	1
DNTAG0778	509	414	479	465	0	395	481	431	337	0	570	600	435	360	0	520	387	542	300	0
DNTAG0779	0	479	501	316	0	0	429	553	235	1	0	532	540	442	0	0	408	436	302	0
DNTAG0780	774	0	620	494	0	688	0	693	425	0	759	0	590	613	0	800	0	645	630	0
DNTAG0781	572	366	506	600	0	480	277	507	493	0	791	595	805	657	0	788	401	931	599	0
DNTAG0782	549	444	472	638	0	492	385	529	527	0	700	634	587	511	0	621	516	697	522	0
DNTAG0783	441	391	370	518	0	372	288	344	341	0	555	627	457	465	0	405	528	398	445	0
DNTAG0784	458	502	407	502	0	429	426	471	404	0	638	651	512	401	0	465	473	573	429	0
DNTAG0785	535	512	590	437	0	413	455	639	353	0	619	613	643	403	0	459	536	713	320	0
DNTAG0786	454	532	531	388	0	359	485	647	309	0	533	560	639	388	0	418	488	684	391	0
DNTAG0787	539	579	534	271	0	435	503	668	179	0	501	574	611	345	0	486	509	666	275	0
DNTAG0788	680	465	460	283	0	494	514	586	182	0	726	568	632	327	0	475	428	671	254	0
DNTAG0789	575	0	615	393	0	540	0	769	296	0	698	0	803	326	0	638	0	792	297	0
DNTAG0790	573	529	516	190	0	484	448	589	137	0	583	560	582	254	1	629	581	612	168	0
DNTAG0791	429	485	0	510	0	406	297	0	459	0	430	569	0	413	0	392	361	0	381	0
DNTAG0792	1	498	660	263	0	0	390	821	143	0	0	697	1223	251	0	0	543	1309	162	0
DNTAG0793	320	0	0	544	0	186	0	0	395	0	346	0	0	370	0	177	0	0	334	0
DNTAG0794	0	343	549	0	0	0	391	545	0	0	0	619	777	0	0	0	500	934	0	1
DNTAG0795	172	445	461	67	0	290	392	562	12	0	509	673	580	107	0	141	547	624	29	0
DNTAG0796	442	446	444	298	0	363	356	512	220	0	504	640	533	190	0	330	457	571	124	0
DNTAG0797	588	417	512	635	0	499	334	662	594	0	721	562	589	479	0	569	444	671	504	0
DNTAG0798	330	376	527	281	0	261	295	526	145	0	291	428	610	249	0	231	250	534	125	0
DNTAG0799	542	644	533	412	0	469	524	642	311	0	648	577	571	365	0	614	464	637	374	0
DNTAG0800	646	608	605	0	0	553	447	687	0	0	720	524	618	0	0	577	409	719	0	0
DNTAG0801	546	577	526	419	0	467	452	551	303	0	559	536	593	370	0	459	571	676	329	0
DNTAG0802	329	0	432	340	0	350	0	373	191	0	192	0	486	397	0	121	0	429	387	1
DNTAG0803	504	502	251	425	0	439	401	270	318	0	612	664	369	563	0	477	603	351	520	0
DNTAG0804	579	437	674	261	0	439	435	769	316	0	670	655	692	367	0	570	558	735	330	0
DNTAG0805	407	467	0	674	0	372	372	0	489	0	561	662	0	559	0	442	638	0	592	0
DNTAG0806	511	568	591	0	0	406	410	688	1	0	556	717	773	0	0	453	670	796	0	0
DNTAG0807	452	333	508	453	0	457	235	510	349	0	612	473	573	390	0	445	385	609	411	1
DNTAG0808	569	350	485	323	0	448	301	581	220	0	629	475	483	313	0	495	372	570	272	0
DNTAG0809	441	0	0	337	0	367	0	0	256	0	503	0	0	266	0	267	0	0	245	0
DNTAG0810	0	0	528	354	0	0	0	567	278	0	0	0	516	329	0	0	0	579	321	0
DNTAG0811	623	620	583	310	0	501	453	614	193	0	610	661	568	298	0	583	414	661	174	0
DNTAG0812	503	313	695	240	0	435	187	754	172	0	536	398	819	283	0	533	217	752	205	1
DNTAG0813	143	435	471	342	0	475	265	652	124	0	526	524	589	299	0	58	378	761	241	0
DNTAG0814	705	179	442	397	0	571	105	546	361	0	614	344	524	516	0	637	172	653	534	0
DNTAG0815	555	1	278	0	0	449	0	251	0	0	591	0	461	0	0	533	0	408	1	0
DNTAG0816	467	585	0	0	0	325	457	0	0	0	389	571	0	0	0	256	450	0	0	0
DNTAG0817	710	610	528	484	0	637	573	585	376	0	681	781	651	399	0	705	637	842	356	0
DNTAG0818	525	401	422	379	0	407	340	494	350	0	516	588	623	487	0	403	527	675	515	0
DNTAG0819	534	446	432	395	0	487	372	471	339	0	455	544	601	362	0	460	428	600	390	0
DNTAG0820	699	608	0	448	0	519	510	0	263	0	560	714	0	343	0	578	589	0	175	0
DNTAG0821	618	0	357	409	0	505	0	242	290	0	612	0	384	352	0	485	0	235	279	0
DNTAG0822	670	311	517	337	0	648	244	609	233	0	625	450	535	257	0	496	269	619	182	0
DNTAG0823	656	376	549	0	0	540	355	594	0	0	573	411	600	0	0	560	356	683	0	0
DNTAG0824	590	325	460	333	0	548	266	516	252	0	633	374	620	384	0	482	316	616	307	0
DNTAG0825	585	524	502	444	0	476	390	538	387	0	510	699	514	565	0	437	458	552	530	0
DNTAG0826	494	359	415	266	0	464	292	502	174	0	571	412	534	329	0	567	369	528	249	0
DNTAG0827	595	490	509	0	0	483	437	529	0	0	669	659	610	0	0	621	494	677	0	0
DNTAG0828	506	565	459	520	0	501	543	488	492	0	632	671	610	546	0	540	558	724	536	0
DNTAG0829	0	193	393	382	0	0	129	415	129	0	0	453	548	183	0	0	201	664	60	0
DNTAG0830	553	479	494	162	0	486	386	543	96	0	616	586	601	239	0	510	541	739	120	0
DNTAG0831	518	371	0	390	0	302	498	0	270	0	567	675	0	431	0	518	555	0	277	0
DNTAG0832	647	415	549	420	0	492	402	614	268	0	623	467	612	346	0	425	423	591	260	0
DNTAG0833	566	300	530	392	0	297	403	492	274	0	538	488	497	300	0	430	488	550	253	0
DNTAG0834	524	592	475	281	0	397	579	568	182	0	512	683	648	235	0	512	585	717	196	0
DNTAG0835	496	530	417	404	0	256	423	546	266	0	524	554	596	356	0	241	444	716	343	0
DNTAG0836	0	199	241	167	0	0	153	518	15	0	0	271	236	94	0	0	156	383	101	0
DNTAG0837	0	405	560	314	0	0	309	606	262	0	0	489	590	351	0	0	404	614	243	0
DNTAG0838	52	185	357	0	0	300	119	480	0	0	408	255	272	0	0	20	168	474	0	0
DNTAG0839	562	282	0	229	0	391	207	0	221	0	620	391	0	303	0	548	280	0	277	0
DNTAG0840	428	0	425	409	0	398	0	438	316	0	591	0	566	369	0	483	0	636	254	0
DNTAG0841	305	573	970	389	0	142	600	1001	205	0	374	723	1551	236	0	149	540	1732	95	0
DNTAG0842	446	515	519	0	0	290	451	608	0	0	414	445	614	0	0	336	389	813	0	0
DNTAG0843	550	165	828	412	0	517	85	891	282	0	607	269	1134	389	0	519	128	1063	348	0
DNTAG0844	581	550	331	464	0	456	524	159	326	0	621	616	322	420	0	426	525	157	388	0
DNTAG0845	704	360	967	421	0	591	192	1155	258	0	583	405	1093	424	0	539	232	1271	332	1
DNTAG0846	659	0	535	446	0	565	0	513	403	0	678	0	552	444	1	642	0	645	462	0
DNTAG0847	221	223	275	0	0	294	187	361	0	0	384	277	334	0	0	56	281	364	0	0
DNTAG0848	554	0	630	60	0	516	0	643	29	0	529	0	656	149	0	520	0	713	63	0
DNTAG0849	378	387	504	212	0	288	290	480	154	0	380	490	563	256	0	330	364	618	173	0
DNTAG0850	634	140	513	410	0	593	62	510	241	0	632	212	602	388	0	613	109	630	249	0
DNTAG0851	654	496	984	462	0	496	422	1050	438	0	702	694	1253	344	0	675	606	1452	381	0
DNTAG0852	599	0	0	422	0	472	0	0	243	0	771	0	0	358	0	712	0	0	234	0
DNTAG0853	659	667	700	266	0	558	527	722	144	0	823	566	1032	297	0	782	502	1060	170	0
DNTAG0854	649	571	641	615	0	467	635	738	480	1	770	599	767	495	0	606	594	831	478	0
DNTAG0855	0	576	0	402	0	0	506	0	344	0	0	663	0	376	0	0	478	0	325	0
DNTAG0856	517	327	0	0	0	384	196	0	0	0	603	362	0	0	0	513	175	0	0	0
DNTAG0857	571	0	0	423	0	420	0	0	375	0	739	0	0	435	0	662	0	0	387	0
DNTAG0858	480	512	477	442	0	491	283	484	276	0	715	582	561	443	0	382	469	612	377	0
DNTAG0859	585	273	496	0	0	494	168	516	0	0	762	313	683	0	0	648	153	630	0	0
DNTAG0860	562	538	261	517	0	517	460	191	389	0	636	633	338	477	0	600	506	225	517	0
DNTAG0861	345	377	91	378	0	249	243	43	208	0	416	551	191	388	0	224	332	90	257	0
DNTAG0862	648	578	627	393	0	457	577	746	280	0	923	729	1214	384	0	614	634	1338	337	0
DNTAG0863	671	466	504	0	0	563	489	494	0	0	670	706	390	0	0	634	567	502	0	0
DNTAG0864	566	575	0	512	0	441	519	0	343	0	725	818	0	587	0	464	671	0	445	0
DNTAG0865	762	202	0	0	0	654	105	0	0	0	896	149	0	0	0	817	61	0	0	0
DNTAG0866	558	509	466	347	0	540	395	504	180	0	922	688	627	529	0	516	603	700	346	0
DNTAG0867	497	468	392	450	0	414	378	501	449	0	705	717	550	511	0	607	599	552	513	0
DNTAG0868	564	476	70	260	0	499	462	32	138	0	769	475	113	322	0	765	457	52	182	0
DNTAG0869	0	448	428	313	0	0	368	504	174	1	0	559	670	335	0	0	417	628	184	0
DNTAG0870	643	514	205	333	0	461	368	114	220	0	566	558	156	299	0	453	513	80	183	0
DNTAG0871	595	696	247	359	0	562	559	166	202	0	760	637	221	356	0	629	612	133	236	0
DNTAG0872	510	759	414	234	0	528	517	558	124	0	581	913	585	261	0	498	853	645	118	0
DNTAG0873	545	259	526	390	0	404	153	577	153	0	614	377	623	391	0	379	259	743	240	0
DNTAG0874	321	528	595	319	0	268	476	626	198	0	357	673	630	314	0	320	553	656	148	0
DNTAG0875	694	616	1610	314	0	565	592	1826	206	0	650	781	2050	413	0	516	743	2255	253	0
DNTAG0876	424	612	474	275	0	688	540	532	154	0	668	692	617	447	0	195	573	610	392	0
DNTAG0877	583	498	442	0	0	494	464	464	1	0	677	679	718	0	0	637	637	706	0	0
DNTAG0878	0	0	342	433	0	0	0	381	302	0	0	0	464	479	0	0	0	422	345	0
DNTAG0879	493	394	154	529	0	403	304	104	357	0	717	618	250	472	0	546	503	168	459	0
DNTAG0880	0	389	442	468	0	0	300	527	333	0	0	504	495	382	0	0	399	561	343	0
DNTAG0881	526	0	574	413	0	414	0	558	334	0	642	0	590	349	0	541	0	577	341	0
DNTAG0882	583	306	499	285	0	525	193	552	191	0	709	367	629	231	0	610	281	679	168	0
DNTAG0883	338	565	0	524	0	240	527	0	374	0	427	654	0	434	0	288	566	0	379	0
DNTAG0884	510	573	226	238	0	411	457	217	188	0	486	510	423	218	0	491	512	277	208	0
DNTAG0885	0	310	587	370	0	0	177	624	318	0	0	409	621	376	0	2	181	660	313	0
DNTAG0886	678	586	610	339	0	505	557	630	229	0	646	618	643	339	0	541	538	694	203	1
DNTAG0887	614	0	470	413	0	451	0	542	250	0	686	2	482	462	0	575	0	517	281	0
DNTAG0888	616	525	443	354	0	622	512	528	161	0	682	758	761	505	0	435	815	760	215	0
DNTAG0889	466	488	471	427	0	507	315	506	280	0	713	697	706	483	0	472	642	877	311	0
DNTAG0890	569	297	531	304	0	511	217	556	174	0	670	591	633	315	0	520	399	659	198	0
DNTAG0891	524	137	410	174	0	317	89	455	90	0	555	251	517	279	0	361	115	615	99	0
DNTAG0892	0	176	405	370	0	0	206	412	169	0	0	336	401	342	0	0	244	527	207	0
DNTAG0893	320	519	628	420	0	190	371	717	284	0	425	570	596	400	0	158	525	596	243	0
DNTAG0894	102	603	729	305	0	63	477	720	264	0	185	568	611	363	0	80	538	693	236	0
DNTAG0895	545	0	387	219	0	500	0	363	84	0	674	0	408	201	0	389	0	391	90	0
DNTAG0896	486	0	617	353	0	501	0	601	240	0	603	0	647	382	0	394	0	734	292	0
DNTAG0897	572	452	490	0	0	435	480	653	0	0	623	589	694	0	0	481	492	733	0	0
DNTAG0898	157	372	518	238	1	55	499	727	130	0	245	647	630	320	0	65	476	693	248	0
DNTAG0899	618	239	644	256	0	523	192	729	195	0	723	435	759	430	0	611	285	816	332	1
DNTAG0900	718	0	469	463	0	524	0	514	401	0	829	0	671	522	0	758	0	674	546	0
DNTAG0901	618	502	604	322	0	498	424	581	211	0	747	767	915	415	0	535	610	941	328	1
DNTAG0902	547	523	0	250	0	436	387	0	148	0	600	575	0	343	0	488	448	0	323	0
DNTAG0903	563	349	582	271	0	475	332	700	164	0	616	474	651	241	0	565	263	739	158	0
DNTAG0904	665	286	532	398	0	522	213	566	285	0	647	387	515	266	0	489	257	501	265	0
DNTAG0905	744	445	436	0	0	645	376	448	0	0	711	621	415	0	0	728	439	463	0	0
DNTAG0906	546	572	426	0	0	561	518	423	0	0	580	627	479	0	0	536	539	420	0	0
DNTAG0907	579	713	555	256	0	457	647	672	210	0	604	671	624	361	0	528	583	636	248	0
DNTAG0908	725	559	586	287	0	610	527	599	235	0	672	660	757	371	0	655	542	851	323	0
DNTAG0909	625	528	540	259	0	544	492	522	216	0	655	665	601	416	0	491	612	672	402	0
DNTAG0910	565	526	494	178	0	458	517	531	117	0	662	663	625	323	0	622	657	728	260	0
DNTAG0911	549	0	465	334	0	492	0	513	199	0	663	0	540	413	0	372	0	553	389	0
DNTAG0912	347	316	368	248	0	468	370	401	95	0	550	529	515	270	0	121	517	664	298	0
DNTAG0913	377	330	13	233	0	304	344	8	167	0	485	560	69	323	0	415	495	34	234	0
DNTAG0914	521	434	491	283	0	422	382	515	251	0	550	603	593	353	0	435	499	619	285	0
DNTAG0915	0	586	571	323	0	0	609	626	286	0	0	650	658	355	0	0	617	714	393	0
DNTAG0916	382	387	454	436	0	336	327	453	380	0	392	453	394	451	1	319	388	436	419	0
DNTAG0917	647	478	503	0	1	554	492	496	0	0	636	565	563	0	0	593	494	541	0	0
DNTAG0918	787	474	332	319	0	620	312	448	253	0	641	394	543	360	0	545	426	468	300	0
DNTAG0919	581	484	552	450	0	417	441	417	363	0	591	534	585	500	0	405	469	402	443	0
DNTAG0920	606	357	484	248	0	415	336	588	171	0	571	515	584	324	0	451	362	712	257	0
DNTAG0921	591	441	584	272	0	379	400	507	155	0	509	542	646	343	0	450	501	623	227	0
DNTAG0922	0	465	0	554	0	0	491	0	395	0	0	633	0	586	0	0	563	0	554	0
DNTAG0923	626	563	421	290	0	483	511	454	229	0	751	676	539	356	0	638	617	595	393	0
DNTAG0924	652	609	489	514	0	560	469	559	407	0	766	818	663	481	0	568	712	832	502	0
DNTAG0925	0	0	0	2	0	1	0	0	0	0	0	0	0	0	0	0	0	1	1	0
DNTAG0926	510	486	250	0	0	405	371	155	0	0	538	508	307	0	0	415	429	201	0	0
DNTAG0927	532	413	514	358	0	480	351	538	248	0	581	518	533	358	0	480	505	590	342	0
DNTAG0928	17	74	77	151	0	103	47	129	8	0	129	82	66	67	0	5	54	152	93	0
DNTAG0929	555	482	603	0	0	489	410	635	0	0	495	490	601	0	0	397	376	652	0	0
DNTAG0930	776	517	548	663	0	650	409	587	538	0	631	551	625	504	0	628	458	742	573	0
DNTAG0931	599	935	424	308	0	522	845	536	260	0	595	1179	614	375	0	470	1086	704	370	0
DNTAG0932	628	0	482	283	0	546	0	477	233	0	547	0	506	418	0	528	0	493	314	0
DNTAG0933	531	312	480	0	0	428	278	518	0	0	480	416	600	0	0	458	331	639	0	0
DNTAG0934	596	0	472	252	0	472	0	585	210	0	654	0	585	304	0	547	0	769	272	0
DNTAG0935	445	669	428	304	0	326	571	502	223	0	576	728	702	332	0	374	607	692	305	0
DNTAG0936	601	434	431	395	0	549	335	487	282	0	727	728	725	382	0	484	598	732	362	0
DNTAG0937	4	27	38	88	0	61	12	84	3	0	86	41	47	20	0	2	21	93	65	0
DNTAG0938	0	0	685	0	0	0	0	773	0	0	0	0	764	0	0	0	0	831	0	0
DNTAG0939	472	464	429	376	0	416	346	505	253	0	533	437	488	423	0	437	311	496	183	0
DNTAG0940	667	616	462	275	0	522	464	558	218	0	630	662	615	284	0	512	610	596	338	0
DNTAG0941	650	1	462	0	0	564	0	596	0	0	639	0	576	0	0	621	0	645	0	0
DNTAG0943	651	0	575	336	0	539	0	554	246	0	662	0	627	344	0	586	0	668	321	0
DNTAG0944	635	454	595	275	0	568	311	644	191	0	665	519	667	313	0	607	495	687	255	0
DNTAG0945	672	550	604	324	0	601	441	736	246	0	698	661	658	424	0	562	536	723	371	0
DNTAG0946	613	579	0	396	0	562	471	0	310	0	682	682	0	390	0	518	639	0	328	0
DNTAG0947	1421	0	551	629	0	1067	0	647	569	0	1511	0	748	569	0	1290	0	802	581	0
DNTAG0948	547	0	0	518	0	384	0	0	374	0	760	0	0	453	0	540	0	0	389	0
DNTAG0949	628	151	0	403	0	473	95	1	222	0	683	308	0	432	0	565	273	0	214	0
DNTAG0950	664	0	478	440	0	564	0	494	292	0	739	0	672	434	0	554	0	697	292	0
DNTAG0951	463	0	0	362	0	482	0	0	177	0	656	0	0	338	0	348	0	1	258	0
DNTAG0952	567	507	0	437	0	480	458	0	370	0	734	588	0	422	0	685	407	0	360	0
DNTAG0953	567	0	402	516	0	465	0	407	474	0	663	0	551	500	0	652	0	531	544	0
DNTAG0954	407	539	372	436	0	344	460	430	337	0	523	694	474	496	0	485	515	574	444	0
DNTAG0955	536	426	0	389	0	482	203	0	256	0	593	480	0	444	0	586	259	0	307	0
DNTAG0956	512	466	478	508	0	521	389	603	332	0	665	621	654	462	0	519	503	820	366	0
DNTAG0957	662	626	491	477	0	464	476	515	301	0	827	761	595	412	0	533	589	606	277	0
DNTAG0958	428	480	467	457	0	361	417	613	395	0	505	650	664	417	0	386	494	716	393	0
DNTAG0959	451	355	491	0	0	529	370	659	0	0	778	585	958	0	0	376	431	1026	0	0
DNTAG0960	930	638	1360	560	0	666	571	1413	358	0	929	1041	2210	469	0	742	815	2369	378	0
DNTAG0961	510	600	621	77	0	490	411	715	24	0	761	634	1015	211	0	501	568	1161	77	0
DNTAG0962	0	0	430	0	0	0	0	456	0	0	0	0	634	0	0	0	0	676	0	0
DNTAG0963	498	606	0	0	0	481	549	0	0	0	672	730	0	0	0	616	659	0	0	0
DNTAG0964	148	0	0	0	0	275	0	0	0	0	359	0	0	0	0	107	0	0	0	0
DNTAG0965	0	192	470	412	0	0	109	463	288	0	0	322	541	372	0	0	109	575	346	1
DNTAG0966	3	12	0	19	0	24	13	0	3	0	53	27	0	23	0	5	11	0	26	0
DNTAG0967	520	380	0	340	0	431	295	0	274	0	596	439	0	428	0	663	339	0	386	0
DNTAG0968	0	346	0	341	0	0	313	0	277	0	0	404	0	468	0	1	362	0	385	0
DNTAG0969	480	417	0	101	0	525	303	0	48	0	639	432	0	238	0	318	367	0	136	0
DNTAG0970	377	392	0	0	0	448	286	0	0	0	510	378	0	0	0	227	362	0	0	0
DNTAG0971	618	632	0	0	0	574	468	0	0	0	649	733	0	0	0	545	552	0	0	0
DNTAG0972	584	218	0	0	0	594	163	0	0	0	655	312	0	0	0	373	271	0	0	0
DNTAG0973	626	326	0	498	0	490	216	0	416	0	842	657	0	562	0	776	389	0	451	0
DNTAG0974	0	262	0	294	0	0	297	0	232	0	0	407	0	410	0	0	388	0	305	0
DNTAG0975	546	489	0	356	0	451	397	0	246	0	693	674	0	351	0	622	589	0	304	0
DNTAG0976	599	498	0	528	0	528	364	2	360	0	645	613	0	345	0	651	545	0	356	0
DNTAG0977	49	319	0	162	0	309	183	0	21	0	399	384	0	119	0	13	228	0	141	0
DNTAG0978	0	585	0	324	0	0	454	0	221	0	0	598	0	363	0	0	481	0	381	0
DNTAG0979	434	358	0	343	0	509	189	0	247	0	611	418	0	305	0	426	238	0	274	0
DNTAG0980	698	311	0	524	0	581	231	0	422	0	750	409	0	502	0	683	201	0	516	0
DNTAG0981	487	374	0	162	0	452	238	0	87	1	513	377	0	188	0	406	199	0	137	0
DNTAG0982	476	360	0	315	1	386	247	0	217	0	648	402	0	303	0	637	249	0	236	0
DNTAG0983	584	441	0	239	0	490	297	0	144	0	675	485	0	353	0	593	295	0	213	0
DNTAG0984	512	354	0	864	0	426	214	0	432	0	550	452	0	720	0	497	299	0	415	0
DNTAG0985	413	340	0	577	0	284	283	0	427	0	600	616	0	503	0	432	389	0	432	0
DNTAG0986	555	476	0	347	1	489	412	0	237	0	563	745	0	356	0	427	584	1	242	0
DNTAG0987	434	489	0	249	0	283	374	0	137	0	408	701	0	243	0	274	556	0	125	0
DNTAG0988	641	306	0	370	0	551	239	0	185	0	693	427	0	206	0	629	302	0	139	0
DNTAG0989	710	0	0	430	0	556	0	0	233	0	775	0	0	354	0	524	0	0	215	0
DNTAG0990	549	671	0	313	0	494	489	0	216	0	603	659	0	312	0	416	545	0	259	0
DNTAG0991	611	0	0	370	0	505	0	0	255	0	633	0	0	347	0	539	0	0	223	0
DNTAG0992	0	0	0	212	0	0	0	0	85	0	0	0	0	210	0	0	0	0	94	0
DNTAG0993	609	572	0	188	0	474	523	0	114	0	540	630	0	201	0	515	522	0	102	0
DNTAG0994	623	496	0	0	0	510	591	0	0	0	672	646	0	0	0	591	574	1	0	0
DNTAG0995	551	590	0	419	0	443	565	0	314	0	587	695	0	427	0	484	555	0	405	0
DNTAG0996	642	0	0	0	0	535	0	0	0	0	736	0	0	0	1	686	0	0	0	0
DNTAG0997	697	626	2	459	0	491	609	0	490	0	641	774	0	494	0	707	692	0	473	0
DNTAG0998	639	537	0	258	0	435	457	0	178	0	650	805	0	347	0	573	562	0	317	0
DNTAG0999	516	453	0	0	0	422	444	0	0	0	623	589	0	0	0	573	523	0	0	0
DNTAG1000	555	274	0	378	0	416	189	0	303	0	531	289	0	301	0	528	220	0	313	0
DNTAG1001	644	493	0	243	0	468	531	0	239	0	623	517	0	346	0	648	510	0	286	0
DNTAG1002	668	281	0	415	0	528	295	0	305	0	649	443	0	346	0	694	288	0	272	0
DNTAG1003	683	473	0	206	0	544	434	0	145	0	601	490	0	211	0	688	315	0	178	0
DNTAG1004	639	545	0	187	0	526	522	0	113	0	549	559	0	275	0	542	520	0	183	0
DNTAG1005	39	69	0	67	0	140	82	0	14	0	131	88	0	74	0	21	76	0	51	0
DNTAG1006	0	121	0	0	0	0	53	0	0	0	0	180	0	0	0	0	74	0	0	0
DNTAG1007	571	501	0	457	0	481	545	0	431	0	653	646	0	460	0	587	598	0	447	0
DNTAG1008	534	537	0	400	0	426	473	0	229	0	584	747	0	376	0	493	645	0	231	0
DNTAG1009	541	547	0	339	0	506	457	0	248	0	658	737	0	305	0	589	600	0	250	0
DNTAG1010	547	485	0	306	0	502	430	0	195	0	634	685	0	390	0	594	615	0	266	0
DNTAG1011	568	459	0	243	0	427	433	0	202	0	493	496	0	338	0	472	495	0	199	0
DNTAG1012	0	536	0	471	0	0	537	0	432	0	0	611	0	424	0	0	597	0	445	0
DNTAG1013	539	587	0	376	1	493	494	0	261	0	653	568	0	321	0	558	552	0	298	0
DNTAG1014	676	526	0	330	0	546	537	0	272	0	536	658	0	313	0	552	580	0	237	0
DNTAG1015	178	450	0	499	0	89	367	0	367	0	123	484	0	421	0	56	431	0	425	0
DNTAG1016	698	459	0	231	0	624	451	0	151	0	641	595	0	295	0	554	453	0	158	0
DNTAG1017	0	510	0	204	0	0	435	0	130	0	0	654	0	240	0	0	577	0	167	0
DNTAG1018	576	517	0	338	0	399	397	0	250	0	541	561	0	416	0	387	501	0	388	0
DNTAG1019	37	0	0	41	0	104	0	0	12	0	114	0	0	46	0	32	0	0	29	0
DNTAG1020	522	519	0	469	0	454	475	0	357	0	710	717	0	437	0	632	655	0	368	0
DNTAG1021	285	480	0	710	0	483	447	0	490	0	671	650	0	582	0	244	541	0	549	0
DNTAG1022	601	493	0	454	0	474	416	0	348	0	616	534	0	385	0	363	460	0	425	0
DNTAG1023	843	0	0	256	0	588	0	0	191	0	713	0	0	261	0	590	0	0	194	0
DNTAG1024	625	234	0	392	0	581	147	0	311	0	587	274	0	381	0	545	178	0	454	0
DNTAG1025	607	572	0	497	0	554	514	0	404	0	541	557	0	409	0	496	509	0	420	0
DNTAG1026	595	443	0	482	0	470	529	0	449	0	659	521	0	405	0	556	461	0	443	0
DNTAG1027	0	398	0	459	0	0	281	0	382	0	0	495	0	411	0	0	339	0	402	0
DNTAG1028	609	475	0	381	0	563	446	0	380	0	605	532	0	409	0	577	457	0	459	0
DNTAG1029	574	418	0	60	0	576	365	0	38	0	561	597	0	119	0	527	494	0	41	0
DNTAG1030	697	547	0	431	0	586	528	0	410	0	680	634	0	512	0	647	561	0	504	0
DNTAG1031	490	395	0	537	0	448	383	0	473	0	523	548	0	503	0	516	471	0	468	0
DNTAG1032	540	525	0	47	0	426	434	0	16	0	726	719	0	194	0	615	596	0	66	0
DNTAG1033	946	595	0	649	0	700	575	0	500	0	880	636	0	523	0	838	552	0	477	0
DNTAG1034	644	575	0	640	0	507	585	0	654	0	726	608	0	602	0	679	608	0	550	0
DNTAG1035	618	597	0	520	0	503	501	0	457	0	673	730	0	436	0	593	513	0	500	0
DNTAG1036	52	0	0	299	0	349	0	0	29	0	490	0	0	171	0	18	0	0	262	0
DNTAG1037	457	529	1	382	0	397	457	0	268	0	486	616	0	349	0	401	572	0	319	0
DNTAG1038	40	82	0	97	0	65	64	0	11	0	136	114	0	85	0	12	148	0	88	0
DNTAG1039	500	520	0	378	0	423	538	0	367	0	564	572	0	411	0	526	553	0	427	0
DNTAG1040	274	0	0	3	0	220	0	0	6	0	223	0	0	61	0	141	0	0	38	0
DNTAG1041	517	420	0	440	0	420	320	0	384	0	567	605	0	438	0	497	537	0	463	0
DNTAG1042	593	0	0	197	0	504	0	0	92	0	624	0	0	289	0	556	0	0	103	0
DNTAG1043	528	294	0	503	0	404	271	0	393	0	607	564	0	417	0	540	373	0	352	0
DNTAG1044	529	414	0	0	0	471	323	0	0	0	764	942	0	0	0	634	858	0	0	0
DNTAG1045	612	957	0	816	0	506	801	0	610	0	604	587	0	646	0	555	510	0	434	0
DNTAG1046	719	836	0	0	0	605	629	0	0	0	780	680	0	0	0	740	538	0	0	0
DNTAG1047	494	365	0	385	0	475	315	0	213	0	814	372	0	329	0	452	307	0	213	0
DNTAG1048	248	0	0	429	0	248	0	0	195	0	469	0	0	358	0	105	0	0	350	0
DNTAG1049	135	1133	0	176	0	108	993	0	73	0	249	1127	0	162	0	93	934	0	72	0
DNTAG1050	550	678	0	427	0	402	452	0	308	0	637	737	0	453	0	388	481	0	331	0
DNTAG1051	495	758	0	641	0	439	509	0	557	0	639	629	0	602	0	483	632	0	727	0
DNTAG1052	448	626	0	329	0	285	474	0	238	0	511	595	0	344	0	433	490	0	257	0
DNTAG1053	383	698	0	529	0	269	583	0	528	0	577	674	0	510	0	422	443	0	495	0
DNTAG1054	623	759	0	671	0	484	709	0	536	0	689	816	0	581	0	701	747	0	543	0
DNTAG1055	601	837	0	441	0	548	658	0	260	0	877	787	0	433	0	739	662	0	309	0
DNTAG1056	0	918	0	663	0	0	666	0	496	0	0	916	0	537	0	0	734	0	554	0
DNTAG1057	611	416	0	0	0	484	286	0	0	0	688	433	0	0	0	545	365	0	0	0
DNTAG1058	535	233	391	298	0	471	161	448	149	0	731	387	572	416	0	654	228	646	255	0
DNTAG1059	351	293	0	67	0	270	169	0	16	0	491	514	0	229	0	217	406	0	85	0
DNTAG1060	538	508	508	0	0	480	428	515	0	0	665	596	603	0	0	698	499	621	0	0
DNTAG1061	640	538	0	506	0	552	555	0	392	0	709	638	0	415	0	735	511	0	397	0
DNTAG1062	0	554	497	483	0	0	532	579	389	0	0	551	652	527	0	0	481	770	524	0
DNTAG1063	0	354	587	0	0	0	228	610	0	0	0	385	586	0	0	0	259	661	0	0
DNTAG1064	0	238	491	410	0	0	161	553	345	0	0	167	590	386	0	0	101	662	330	0
DNTAG1065	0	545	616	378	0	0	409	662	314	0	0	576	674	405	0	1	345	816	395	0
DNTAG1066	541	473	0	469	0	524	324	0	389	0	697	477	0	413	0	655	284	0	375	0
DNTAG1067	0	605	561	0	0	0	572	502	0	0	0	688	600	0	0	0	624	578	0	0
DNTAG1068	0	684	398	562	0	0	431	413	520	0	0	791	594	769	0	0	519	647	842	0
DNTAG1069	637	563	0	617	0	518	507	0	523	0	708	703	0	638	0	683	611	0	571	0
DNTAG1070	0	0	475	658	1	0	1	506	570	0	0	0	615	575	0	0	0	647	595	0
DNTAG1071	0	530	507	410	0	0	469	554	330	0	0	673	541	304	0	0	651	669	250	0
DNTAG1072	537	365	452	146	0	457	287	554	73	0	648	532	511	231	0	479	472	573	136	0
DNTAG1073	0	345	392	210	0	0	250	525	45	0	0	384	331	131	0	0	268	515	206	0
DNTAG1074	686	577	483	406	0	581	532	487	354	0	745	547	503	442	0	648	508	523	448	1
DNTAG1075	618	578	628	427	0	472	477	611	428	0	649	630	613	423	0	565	556	672	458	0
DNTAG1076	631	499	765	446	0	550	412	782	333	0	682	574	883	393	0	602	421	917	366	0
DNTAG1077	500	0	575	358	0	431	0	532	276	0	498	0	528	384	0	449	0	648	357	0
DNTAG1078	647	482	0	349	0	514	387	0	305	0	678	507	0	414	0	604	337	0	416	0
DNTAG1079	664	0	511	0	0	572	0	570	0	0	746	0	597	0	0	571	0	674	0	0
DNTAG1080	346	319	377	256	0	365	269	386	152	0	442	508	535	317	0	278	323	637	202	0
DNTAG1081	530	0	499	394	0	457	0	526	278	0	723	0	805	415	0	539	0	926	359	0
DNTAG1082	484	235	519	204	0	372	144	586	131	0	585	433	628	281	0	564	139	653	134	0
DNTAG1083	547	0	484	502	0	510	0	535	426	0	625	0	588	445	0	510	0	648	457	0
DNTAG1084	553	217	521	461	0	486	121	603	319	0	564	270	542	400	0	373	118	580	336	0
DNTAG1085	491	534	567	628	0	514	363	734	468	0	626	620	627	444	0	593	501	710	439	1
DNTAG1086	787	253	546	408	0	645	134	601	351	0	615	314	567	427	0	471	165	658	394	0
DNTAG1087	10	13	34	0	0	28	10	36	0	0	33	10	33	0	0	2	3	40	0	0
DNTAG1088	663	255	565	517	0	476	206	690	409	0	693	398	688	517	0	430	319	816	469	0
DNTAG1089	584	191	0	0	0	504	159	0	0	0	534	245	0	91	0	482	155	0	33	0
DNTAG1090	800	0	531	335	0	609	0	590	298	0	812	0	632	402	0	661	0	735	442	0
DNTAG1091	595	0	532	295	0	505	0	476	230	0	702	0	595	292	0	568	0	639	365	0
DNTAG1092	763	572	516	533	0	618	516	529	494	0	773	757	923	647	0	734	543	990	627	0
DNTAG1093	570	377	520	434	0	434	300	639	397	0	683	617	886	497	0	591	405	854	401	0
DNTAG1094	655	494	394	0	1	482	407	356	0	0	609	629	507	0	0	497	499	431	0	0
DNTAG1095	768	0	440	490	0	633	0	416	447	0	673	0	417	402	0	680	0	496	433	0
DNTAG1096	0	1	0	0	0	1	0	0	0	0	0	0	0	0	0	0	0	0	0	0
DNTAG1097	610	360	535	267	0	579	244	665	270	0	588	406	600	273	0	575	325	701	283	0
DNTAG1099	695	631	612	471	0	577	517	614	456	0	616	723	609	499	0	613	493	705	522	0
DNTAG1100	750	468	585	531	0	583	425	632	394	0	741	582	712	554	0	578	442	734	519	0
DNTAG1101	691	496	679	352	0	585	477	683	297	0	563	577	685	404	0	542	548	768	361	0
DNTAG1102	578	539	489	567	0	429	423	554	464	0	578	659	609	625	0	405	584	697	590	0
DNTAG1103	535	436	601	447	0	494	403	678	429	0	677	541	753	502	0	588	488	883	511	0
DNTAG1104	123	0	476	444	0	85	0	425	465	0	227	0	569	532	0	106	0	725	467	0
DNTAG1105	638	427	967	547	0	471	387	1112	535	0	662	684	1393	551	0	502	623	1550	627	0
DNTAG1106	452	430	863	413	0	498	325	963	320	0	621	542	1190	420	0	304	474	1238	452	0
DNTAG1107	439	461	429	405	0	386	321	533	177	0	452	520	537	425	0	172	468	624	434	0
DNTAG1108	642	499	491	475	0	555	407	608	372	0	654	556	666	434	0	501	488	647	374	0
DNTAG1109	584	383	550	438	0	495	324	689	419	0	527	446	700	431	0	577	386	696	448	0
DNTAG1110	650	439	366	411	0	635	368	356	288	0	702	540	364	411	0	291	466	438	284	0
DNTAG1111	604	0	454	419	0	497	0	533	354	0	525	0	601	437	0	441	0	625	440	0
DNTAG1112	0	465	555	461	0	0	433	699	307	0	0	629	653	433	0	0	627	808	474	0
DNTAG1113	0	507	511	381	0	0	470	560	340	0	0	632	603	481	0	0	634	648	508	0
DNTAG1114	0	514	482	443	0	0	405	620	371	0	0	605	632	430	0	0	493	735	504	0
DNTAG1115	0	447	486	431	0	0	400	491	380	0	0	590	556	534	0	0	629	681	505	0
DNTAG1116	0	0	367	509	0	0	0	444	467	0	0	0	656	578	0	0	0	703	598	0
DNTAG1117	1	341	440	599	0	0	257	526	443	0	0	534	577	511	0	0	301	717	480	0
DNTAG1118	0	186	505	155	0	0	89	533	90	0	0	289	689	188	0	0	223	848	87	0
DNTAG1119	0	498	0	152	0	0	418	0	93	0	0	598	0	249	0	0	486	0	171	0
DNTAG1120	0	0	1051	305	0	1	0	1044	313	0	0	0	1158	332	0	0	0	1178	339	0
DNTAG1121	0	483	527	0	0	0	396	554	0	0	0	520	632	0	0	1	392	672	0	0
DNTAG1122	0	581	528	0	0	0	482	586	1	0	0	624	589	0	0	0	469	684	0	0
DNTAG1123	0	369	473	317	0	0	255	578	248	0	0	520	556	380	0	0	422	656	266	0
DNTAG1124	0	418	524	0	0	0	325	501	0	0	0	495	497	0	0	1	365	597	0	0
DNTAG1125	0	417	532	0	0	0	421	555	0	0	0	546	601	0	0	0	482	673	0	0
DNTAG1126	0	449	514	0	0	0	328	541	0	0	0	561	543	0	0	0	509	634	0	0
DNTAG1127	0	496	969	0	0	0	373	1042	1	0	0	702	1297	0	0	0	606	1355	0	0
DNTAG1128	0	0	393	0	0	0	0	367	0	0	0	0	623	0	0	1	0	711	0	1
DNTAG1129	0	401	540	0	0	0	342	543	0	0	0	482	739	0	0	0	368	771	0	1
DNTAG1130	0	496	467	0	0	0	323	513	0	0	0	535	558	0	0	0	489	638	0	0
DNTAG1131	0	505	0	0	0	0	374	0	0	0	0	566	0	0	0	0	523	0	0	0
DNTAG1133	0	0	490	0	0	0	0	586	0	0	0	0	588	0	0	0	0	634	0	0
DNTAG1134	0	0	483	0	0	0	0	508	0	0	0	0	528	0	0	0	0	584	0	0
DNTAG1135	0	0	494	0	0	0	0	612	0	0	0	0	638	0	0	0	0	673	0	0
DNTAG1136	0	0	474	0	0	0	0	532	0	0	0	0	583	0	0	0	0	673	0	0
DNTAG1137	0	0	576	0	0	0	0	628	0	0	0	0	622	0	0	0	0	750	0	0
DNTAG1138	0	0	502	0	0	0	0	519	0	0	0	0	701	0	0	0	0	739	0	0
DNTAG1139	0	0	400	0	0	0	0	436	0	0	0	0	485	0	0	0	0	576	0	0
DNTAG1141	0	0	884	0	0	0	0	802	0	0	0	0	1112	0	0	0	0	1196	0	1
DNTAG1142	0	0	612	0	0	0	0	594	0	0	0	0	667	0	0	1	0	532	0	0
DNTAG1143	0	0	995	0	0	0	0	1216	0	0	0	0	1240	0	0	0	0	1422	0	0
DNTAG1144	0	0	1239	0	0	0	0	1584	0	0	2	0	1756	0	0	0	0	1969	0	0
DNTAG1145	0	0	1481	0	0	0	0	1711	0	0	0	0	2132	0	0	0	0	2278	0	0
DNTAG1146	0	0	0	0	0	0	0	0	0	0	0	0	0	0	0	1	0	0	0	0
DNTAG1147	0	0	1023	0	0	0	0	1123	0	0	0	0	1753	0	0	0	0	2173	0	1
DNTAG1148	0	0	11	0	0	0	0	9	0	0	0	0	11	0	0	0	0	21	0	0
DNTAG1149	0	0	1620	0	0	0	0	1699	0	0	0	0	2108	0	0	0	0	2327	0	0
DNTAG1150	0	0	581	0	0	0	0	572	0	0	0	0	696	0	0	0	0	733	0	0
DNTAGDOT1OE	160	146	192	82	227	151	131	155	49	203	323	309	282	247	331	234	272	331	248	308
DNTAGH3K18R	113	118	185	76	144	84	76	111	28	94	184	185	186	234	206	51	102	89	120	97
DNTAGH4d	76	88	107	77	122	71	42	76	17	80	301	240	245	175	338	45	76	105	71	122
DNTAGbre1	356	284	283	129	319	315	166	304	65	283	464	524	483	498	575	164	382	362	438	416
