# Supplementary material for: Direct screening for chromatin status on DNA barcodes in yeast delineates the regulome of H3K79 methylation by Dot1
Source: eLife. 2016 Dec 6;5:e18919. doi: 10.7554/eLife.18919 (PMC5179194; doi:10.7554/eLife.18919)
Supplement: Figure 2—source data 2. — DOI: http://dx.doi.org/10.7554/eLife.18919.008 [file elife-18919-fig2-data2.xlsx]

## Sheet: Readme
Figure 2 - source data 2
Belonging to Figure 2B
Growth-corrected H3K79me scores
2 sheets in this Excel file
UpTag	Log2-transformed values of UpTag data of two screens, corrected by subtracting the value expected based on the growth rate of this strain.
DownTag	Log2-transformed values of DownTag data of two screens, corrected by subtracting the value expected based on the growth rate of this strain.
	Formula used for UpTag:
	growth-corrected ratio = ratio + 4.116 * (growth rate - 0.42), in which values are log2-transformed and growth rate is h-1
	Formula used for DownTag:
	growth-corrected ratio = ratio + 2.384 * (growth rate - 0.42), in which values are log2-transformed and growth rate is h-1
Columns
Row names	Unique identifiers: Plate_barcode
Plate	Which of 5 plates (5 subsets) the strain was on
ORF	Systematic name of the deleted gene
Gene	Standard name, as in SGD in February 2016
TAG	Barcode present in this strain.
average_log2	Correction applied to average data
data2012_log2	Correction applied to 2012 data
data2013_log2	Correction applied to 2012 data

## Sheet: UpTag
	Plate	ORF	Gene	TAG	average_log2	data2012_log2	data2013_log2
2_UPTAG0595	2	YGL058W	RAD6	UPTAG0595	-3.8238	-3.57681	-4.122
3_UPTAGbre1KO	3	BRE1_Plate3	BRE1	UPTAGbre1KO	-3.60529	-3.93175	-3.33925
2_UPTAG1093	2	YGL244W	RTF1	UPTAG1093	-3.23863	-3.41024	-3.08528
2_UPTAG0305	2	YPL055C	LGE1	UPTAG0305	-3.18718	-2.88315	-3.57289
1_UPTAGbre1KO	1	BRE1_Plate1	BRE1	UPTAGbre1KO	-3.10279	-3.12229	-3.08356
2_UPTAGbre1KO	2	BRE1_Plate2	BRE1	UPTAGbre1KO	-3.04153	-3.41628	-2.74434
4_UPTAGbre1KO	4	BRE1_Plate4	BRE1	UPTAGbre1KO	-2.88541	-2.45443	-3.50279
2_UPTAG0797	2	YDL074C	BRE1	UPTAG0797	-2.88105	-3.19692	-2.62207
5_UPTAGbre1KO	5	BRE1_Plate5	BRE1	UPTAGbre1KO	-2.52874	-2.32284	-2.76901
1_UPTAG0323	1	YDL040C	NAT1	UPTAG0323	-2.13828	-2.264	-2.02265
1_UPTAG0322	1	YHR013C	ARD1	UPTAG0322	-2.06052	-2.16621	-1.96204
5_UPTAG0186	5	YJR105W	ADO1	UPTAG0186	-1.73142	-1.69422	-1.7696
4_UPTAG0991	4	YGR118W	RPS23A	UPTAG0991	-1.24017	-1.57647	-0.96763
4_UPTAG0808	4	YHR168W	MTG2	UPTAG0808	-1.13137	-1.18953	-1.07547
4_UPTAG0691	4	YKL094W	YJU3	UPTAG0691	-1.12381	-1.42264	-0.876379
2_UPTAG0839	2	YDR195W	REF2	UPTAG0839	-1.06956	-1.0309	-1.10929
4_UPTAG0361	4	YLR114C	AVL9	UPTAG0361	-1.03299	-1.27476	-0.825983
4_UPTAG0871	4	YOL121C	RPS19A	UPTAG0871	-1.00763	-0.734313	-1.34511
2_UPTAG0206	2	YDR079C-A	TFB5	UPTAG0206	-0.981361	-0.914072	-1.05194
1_UPTAG0482	1	YKL080W	VMA5	UPTAG0482	-0.941334		-0.941334
4_UPTAG0798	4	YOR078W	BUD21	UPTAG0798	-0.884035	-0.982016	-0.792287
4_UPTAG0861	4	YHL033C	RPL8A	UPTAG0861	-0.854217	-0.788397	-0.923184
1_UPTAG1049	1	YDR017C	KCS1	UPTAG1049	-0.846645	-0.733057	-0.969947
2_UPTAG0726	2	YMR075W	RCO1	UPTAG0726	-0.828141	-0.797268	-0.85969
4_UPTAG1091	4	YGL049C	TIF4632	UPTAG1091	-0.810756	-1.12781	-0.550983
4_UPTAG1035	4	YGR271W	SLH1	UPTAG1035	-0.805511	-0.971624	-0.656565
4_UPTAG0811	4	YMR064W	AEP1	UPTAG0811	-0.792504	-0.9203	-0.675112
4_UPTAG0714	4	YJR097W	JJJ3	UPTAG0714	-0.786476	-0.614602	-0.981631
1_UPTAG0474	1	YPL084W	BRO1	UPTAG0474	-0.783242	-0.839925	-0.728702
4_UPTAG0796	4	YLR068W	FYV7	UPTAG0796	-0.777582	-0.616245	-0.959259
4_UPTAG0395	4	YOR238W	YOR238W	UPTAG0395	-0.777028	-1.00397	-0.580981
1_UPTAG0250	1	YDR027C	VPS54	UPTAG0250	-0.774084	-0.605381	-0.965159
4_UPTAG0836	4	YBL087C	RPL23A	UPTAG0836	-0.762406	-0.762406
4_UPTAG0690	4	YHR049W	FSH1	UPTAG0690	-0.756096	-0.827522	-0.68804
4_UPTAG0063	4	YFR012W	DCV1	UPTAG0063	-0.752561	-0.845829	-0.664958
4_UPTAG0831	4	YOR312C	RPL20B	UPTAG0831	-0.749558	-0.611751	-0.901931
2_UPTAG0774	2	YAL011W	SWC3	UPTAG0774	-0.722945	-0.839453	-0.615147
5_UPTAG0006	5	YIR032C	DAL3	UPTAG0006	-0.714557	-1.18075	-0.362786
1_UPTAG0487	1	YDR456W	NHX1	UPTAG0487	-0.712937	-0.515496	-0.941749
2_UPTAG0169	2	YGR081C	SLX9	UPTAG0169	-0.708334	-0.775636	-0.644033
2_UPTAG0056	2	YKL056C	TMA19	UPTAG0056	-0.706713	-0.654042	-0.76138
5_UPTAG0060	5	YML096W	YML096W	UPTAG0060	-0.700752	-0.889576	-0.533806
4_UPTAG0128	4	YJL037W	IRC18	UPTAG0128	-0.69831	-0.789129	-0.612871
4_UPTAG0488	4	YLR016C	PML1	UPTAG0488	-0.696044	-0.708562	-0.683633
5_UPTAG0072	5	YLR089C	ALT1	UPTAG0072	-0.694125	-0.980981	-0.454954
4_UPTAG1008	4	YKR094C	RPL40B	UPTAG1008	-0.693374	-0.591382	-0.803129
4_UPTAG0636	4	YML018C	YML018C	UPTAG0636	-0.691331	-0.811255	-0.580616
1_UPTAG0273	1	YAL002W	VPS8	UPTAG0273	-0.691215	-0.704986	-0.677574
4_UPTAG1123	4	YDL020C	RPN4	UPTAG1123	-0.690047	-0.630177	-0.752509
5_UPTAG0388	5	YNL146C-A	YNL146C-A	UPTAG0388	-0.689497	-0.818355	-0.571211
1_UPTAG0883	1	YDL227C	HO	UPTAG0883	-0.68788	-0.377195	-1.08437
1_UPTAG0726	1	YLR238W	FAR10	UPTAG0726	-0.685191	-0.757372	-0.61645
4_UPTAG1053	4	YOR201C	MRM1	UPTAG1053	-0.682258	-0.84269	-0.537895
4_UPTAG0993	4	YML024W	RPS17A	UPTAG0993	-0.679452	-0.731944	-0.628803
2_UPTAG0956	2	YFR010W	UBP6	UPTAG0956	-0.674549	-0.6664	-0.682745
5_UPTAG0245	5	YNL008C	ASI3	UPTAG0245	-0.670937	-0.655303	-0.686743
2_UPTAG0381	2	YLR226W	BUR2	UPTAG0381	-0.667929	-0.850237	-0.506096
2_UPTAG0724	2	YOR189W	IES4	UPTAG0724	-0.66375	-0.694224	-0.633906
3_UPTAG1091	3	YMR126C	DLT1	UPTAG1091	-0.658074	-0.568191	-0.75393
4_UPTAG0430	4	YBR090C	YBR090C	UPTAG0430	-0.651035	-0.48469	-0.839091
4_UPTAG1045	4	YHR066W	SSF1	UPTAG1045	-0.6507	-0.786847	-0.5263
1_UPTAG0731	1	YBL006C	LDB7	UPTAG0731	-0.648692	-0.516358	-0.794401
1_UPTAG1035	1	YDR098C	GRX3	UPTAG1035	-0.646801	-0.687648	-0.60708
4_UPTAG1018	4	YGL143C	MRF1	UPTAG1018	-0.64324	-0.74025	-0.552344
2_UPTAG0365	2	YLR190W	MMR1	UPTAG0365	-0.640802	-0.530111	-0.760697
3_UPTAG0724	3	YOR393W	ERR1	UPTAG0724	-0.640492	-0.809717	-0.48905
5_UPTAG0532	5	YLL041C	SDH2	UPTAG0532	-0.640336	-0.732025	-0.554128
1_UPTAG0495	1	YBR286W	APE3	UPTAG0495	-0.639349	-0.500403	-0.793117
1_UPTAG0412	1	YPL065W	VPS28	UPTAG0412	-0.636327	-0.531344	-0.749555
2_UPTAG0548	2	YML016C	PPZ1	UPTAG0548	-0.634743	-0.547659	-0.727422
2_UPTAG0521	2	YBL008W	HIR1	UPTAG0521	-0.631157	-0.552761	-0.714059
4_UPTAG0388	4	YOL087C	DUF1	UPTAG0388	-0.629603	-0.682541	-0.57854
1_UPTAG0842	1	YML008C	ERG6	UPTAG0842	-0.625636	-0.492403	-0.772437
1_UPTAG0916	1	YLR133W	CKI1	UPTAG0916	-0.622783	-0.655501	-0.590791
4_UPTAG1022	4	YHR109W	CTM1	UPTAG1022	-0.621951	-0.621951
3_UPTAG0190	3	YNR002C	ATO2	UPTAG0190	-0.621387	-0.671387	-0.573063
4_UPTAG0764	4	YDR219C	MFB1	UPTAG0764	-0.621265	-0.827955	-0.44051
4_UPTAG0774	4	YDR444W	YDR444W	UPTAG0774	-0.621035	-0.675813	-0.56826
3_UPTAG0424	3	YDR079W	PET100	UPTAG0424	-0.613774	-0.595179	-0.632612
3_UPTAG0803	3	YEL017W	GTT3	UPTAG0803	-0.609227	-0.542821	-0.678837
2_UPTAG0504	2	YDR363W-A	SEM1	UPTAG0504	-0.607835	-0.669313	-0.54887
4_UPTAG1033	4	YOR302W	YOR302W	UPTAG1033	-0.59866	-0.513048	-0.689675
4_UPTAG0908	4	YGR076C	MRPL25	UPTAG0908	-0.591452	-0.684336	-0.504188
1_UPTAG0128	1	YER049W	TPA1	UPTAG0128	-0.587593	-0.522517	-0.655743
4_UPTAG0992	4	YPR132W	RPS23B	UPTAG0992	-0.573112	-0.591888	-0.554576
2_UPTAG1107	2	YPL177C	CUP9	UPTAG1107	-0.571622	-0.379501	-0.793316
4_UPTAG0424	4	YGL131C	SNT2	UPTAG0424	-0.570557	-0.712587	-0.441265
1_UPTAG0219	1	YBR201W	DER1	UPTAG0219	-0.569673	-0.428118	-0.726645
5_UPTAG0519	5	YJL023C	PET130	UPTAG0519	-0.568708	-0.640183	-0.500608
2_UPTAG0017	2	YPL189W	GUP2	UPTAG0017	-0.567568	-0.448454	-0.69741
3_UPTAG0017	3	YPR200C	ARR2	UPTAG0017	-0.566164	-0.389114	-0.768022
4_UPTAG0250	4	YOR066W	MSA1	UPTAG0250	-0.565525	-0.655447	-0.48088
2_UPTAG0999	2	YGL013C	PDR1	UPTAG0999	-0.563459	-0.379681	-0.774113
4_UPTAG0523	4	YOR227W	HER1	UPTAG0523	-0.56297	-0.290287	-0.899492
3_UPTAG0606	3	YGL020C	GET1	UPTAG0606	-0.562617	-0.665034	-0.46699
2_UPTAG0988	2	YIL038C	NOT3	UPTAG0988	-0.561741	-0.446489	-0.687006
4_UPTAG1050	4	YNL135C	FPR1	UPTAG1050	-0.560833	-0.504767	-0.619166
2_UPTAG1123	2	YBL021C	HAP3	UPTAG1123	-0.556656	-0.564245	-0.549107
3_UPTAG0934	3	YDR516C	EMI2	UPTAG0934	-0.556581	-0.630942	-0.485865
2_UPTAG0424	2	YKR091W	SRL3	UPTAG0424	-0.555781	-0.598396	-0.51439
4_UPTAG1010	4	YLR448W	RPL6B	UPTAG1010	-0.53922	-0.640109	-0.444927
1_UPTAG0034	1	YPR084W	YPR084W	UPTAG0034	-0.538355	-0.526246	-0.550568
4_UPTAG0245	4	YOL131W	YOL131W	UPTAG0245	-0.538247	-0.738515	-0.362421
3_UPTAG0678	3	YBR145W	ADH5	UPTAG0678	-0.537617	-0.514702	-0.560902
4_UPTAG0685	4	YBR261C	TAE1	UPTAG0685	-0.534921	-0.569824	-0.500842
4_UPTAG0304	4	YBR052C	RFS1	UPTAG0304	-0.534507	-0.62866	-0.446123
1_UPTAG0398	1	YLR085C	ARP6	UPTAG0398	-0.531727	-0.596828	-0.469437
4_UPTAG0341	4	YIL161W	YIL161W	UPTAG0341	-0.530488	-0.756166	-0.335384
4_UPTAG0480	4	YJR056C	YJR056C	UPTAG0480	-0.52979	-0.644686	-0.423374
2_UPTAG0248	2	YJL098W	SAP185	UPTAG0248	-0.526362	-0.501165	-0.552006
3_UPTAG0811	3	YPR160W	GPH1	UPTAG0811	-0.526236	-0.731998	-0.34619
1_UPTAG0306	1	YDR479C	PEX29	UPTAG0306	-0.524762	-0.536247	-0.513367
1_UPTAG0259	1	YMR162C	DNF3	UPTAG0259	-0.523856	-0.65558	-0.403159
2_UPTAG0326	2	YHL022C	SPO11	UPTAG0326	-0.522923	-0.436539	-0.61481
1_UPTAG0774	1	YLR300W	EXG1	UPTAG0774	-0.522433	-0.592674	-0.455455
3_UPTAG0680	3	YNL331C	AAD14	UPTAG0680	-0.522414	-0.51952	-0.525315
3_UPTAG0388	3	YMR267W	PPA2	UPTAG0388	-0.521737	-0.39942	-0.655393
2_UPTAG0803	2	YEL015W	EDC3	UPTAG0803	-0.520554	-0.516621	-0.524498
4_UPTAG1009	4	YML073C	RPL6A	UPTAG1009	-0.520532	-0.539722	-0.501593
5_UPTAG0027	5	YBR249C	ARO4	UPTAG0027	-0.519584		-0.519584
2_UPTAG1092	2	YOR123C	LEO1	UPTAG1092	-0.519013	-0.411087	-0.63567
4_UPTAG0680	4	YER007C-A	TMA20	UPTAG0680	-0.518952	-0.228654	-0.882766
2_UPTAG1126	2	YMR012W	CLU1	UPTAG1126	-0.517342	-0.504862	-0.529932
3_UPTAG0501	3	YGR207C	CIR1	UPTAG0501	-0.51468	-0.614846	-0.421019
1_UPTAG0675	1	YGR237C	YGR237C	UPTAG0675	-0.51456	-0.488924	-0.540661
5_UPTAG0333	5	YJL127C-B	YJL127C-B	UPTAG0333	-0.513915	-0.624011	-0.411628
5_UPTAG0548	5	YNR001C	CIT1	UPTAG0548	-0.512566	-0.48054	-0.54532
1_UPTAG0921	1	YGR202C	PCT1	UPTAG0921	-0.511068	-0.516979	-0.505182
3_UPTAG0879	3	YOR085W	OST3	UPTAG0879	-0.511025	-0.71703	-0.330793
4_UPTAG0249	4	YOR021C	SFM1	UPTAG0249	-0.510961	-0.625923	-0.404488
1_UPTAG0249	1	YDR484W	VPS52	UPTAG0249	-0.510688	-0.491854	-0.529771
2_UPTAG0102	2	YKL129C	MYO3	UPTAG0102	-0.510479	-0.471069	-0.550996
2_UPTAG0310	2	YGL192W	IME4	UPTAG0310	-0.509935	-0.296047	-0.761146
4_UPTAG1030	4	YGR232W	NAS6	UPTAG1030	-0.509829	-0.644303	-0.386827
1_UPTAG0639	1	YOR264W	DSE3	UPTAG0639	-0.509155	-0.453044	-0.567538
2_UPTAG0481	2	YHR111W	UBA4	UPTAG0481	-0.508646	-0.46941	-0.54898
1_UPTAG0179	1	YOR327C	SNC2	UPTAG0179	-0.505888	-0.337794	-0.696182
4_UPTAG0911	4	YMR024W	MRPL3	UPTAG0911	-0.505627	-0.527533	-0.484049
1_UPTAG1045	1	YOL151W	GRE2	UPTAG1045	-0.504782	-0.557823	-0.453622
2_UPTAG1114	2	YOR179C	SYC1	UPTAG1114	-0.501386	-0.57778	-0.428835
2_UPTAG0024	2	YOR104W	PIN2	UPTAG0024	-0.500941	-0.518356	-0.483734
1_UPTAG0432	1	YBR164C	ARL1	UPTAG0432	-0.500773	-0.503215	-0.498335
4_UPTAG1107	4	YOR274W	MOD5	UPTAG1107	-0.499675	-0.775031	-0.268545
5_UPTAG0148	5	YBL098W	BNA4	UPTAG0148	-0.498144	-0.3955	-0.608653
3_UPTAG0623	3	YMR097C	MTG1	UPTAG0623	-0.496394	-0.76355	-0.271065
1_UPTAG0707	1	YNR027W	BUD17	UPTAG0707	-0.494851	-0.411519	-0.583292
2_UPTAG0753	2	YBR010W	HHT1	UPTAG0753	-0.494702	-0.286636	-0.737916
5_UPTAG0726	5	YLR044C	PDC1	UPTAG0726	-0.49388	-0.431105	-0.559512
2_UPTAG0191	2	YBR228W	SLX1	UPTAG0191	-0.493104	-0.541346	-0.446423
5_UPTAG0674	5	YAL065C	YAL065C	UPTAG0674	-0.491814	-0.49626	-0.487382
5_UPTAG0201	5	YMR271C	URA10	UPTAG0201	-0.490497	-0.51372	-0.467642
1_UPTAG0185	1	YML012W	ERV25	UPTAG0185	-0.489805	-0.474555	-0.505219
5_UPTAG0523	5	YJR070C	LIA1	UPTAG0523	-0.488837	-0.476282	-0.501502
1_UPTAG0936	1	YBL056W	PTC3	UPTAG0936	-0.488724	-0.721122	-0.28862
4_UPTAG1090	4	YKR059W	TIF1	UPTAG1090	-0.488214	-0.637527	-0.352915
4_UPTAG0414	4	YJL082W	IML2	UPTAG0414	-0.487393	-0.484698	-0.490094
5_UPTAG0714	5	YJR001W	AVT1	UPTAG0714	-0.487306	-0.648654	-0.342201
4_UPTAG0417	4	YER037W	PHM8	UPTAG0417	-0.48658	-0.415425	-0.561426
1_UPTAG0292	1	YPR051W	MAK3	UPTAG0292	-0.486554	-0.604414	-0.3776
3_UPTAG0639	3	YBR037C	SCO1	UPTAG0639	-0.486078	-0.585173	-0.393354
1_UPTAG0238	1	YJL099W	CHS6	UPTAG0238	-0.485808	-0.342741	-0.64464
1_UPTAG0775	1	YHR143W	DSE2	UPTAG0775	-0.485495	-0.68598	-0.309501
1_UPTAG0021	1	YJL223C	PAU1	UPTAG0021	-0.483927	-0.327542	-0.659349
2_UPTAG0970	2	YJR147W	HMS2	UPTAG0970	-0.482032	-0.357862	-0.617903
2_UPTAG0691	2	YER130C	COM2	UPTAG0691	-0.478617	-0.41011	-0.550541
1_UPTAG0103	1	YBR287W	YBR287W	UPTAG0103	-0.478368	-0.226616	-0.783536
3_UPTAG0638	3	YKL016C	ATP7	UPTAG0638	-0.477569	-0.425403	-0.531692
4_UPTAG0740	4	YNL281W	HCH1	UPTAG0740	-0.476924	-0.602478	-0.361427
2_UPTAG1006	2	YGL115W	SNF4	UPTAG1006	-0.476607	-0.476607
3_UPTAG0041	3	YKL213C	DOA1	UPTAG0041	-0.475521	-0.482724	-0.468355
1_UPTAG0366	1	YDR414C	ERD1	UPTAG0366	-0.475384	-0.494681	-0.456342
3_UPTAG0714	3	YJL132W	YJL132W	UPTAG0714	-0.475191	-0.330141	-0.636471
5_UPTAG0555	5	YOR142W	LSC1	UPTAG0555	-0.473384	-0.609009	-0.349421
1_UPTAG1033	1	YIR037W	HYR1	UPTAG1033	-0.472265	-0.412622	-0.534481
4_UPTAG0949	4	YDR450W	RPS18A	UPTAG0949	-0.471078	-0.349258	-0.604141
4_UPTAG0936	4	YMR158W	MRPS8	UPTAG0936	-0.468546	-0.334477	-0.616363
5_UPTAG0465	5	YEL076C	YEL076C	UPTAG0465	-0.468447	-0.300658	-0.658352
1_UPTAG1050	1	YNL160W	YGP1	UPTAG1050	-0.462454	-0.41488	-0.51165
2_UPTAG0306	2	YGL045W	RIM8	UPTAG0306	-0.461823	-0.25808	-0.699147
2_UPTAG0015	2	YJR107W	YJR107W	UPTAG0015	-0.461476	-0.544322	-0.38313
1_UPTAG0153	1	YMR140W	SIP5	UPTAG0153	-0.460874	-0.32517	-0.610679
1_UPTAG0656	1	YBL066C	SEF1	UPTAG0656	-0.460671	-0.426769	-0.495388
1_UPTAG0525	1	YJR058C	APS2	UPTAG0525	-0.460474	-0.557127	-0.369891
1_UPTAG0031	1	YGL081W	YGL081W	UPTAG0031	-0.459638	-0.485409	-0.43432
3_UPTAG0841	3	YPL096W	PNG1	UPTAG0841	-0.457653	-0.51402	-0.403406
3_UPTAG0248	3	YPL274W	SAM3	UPTAG0248	-0.457649	-0.371042	-0.54979
1_UPTAG0521	1	YHL019C	APM2	UPTAG0521	-0.457047	-0.223687	-0.735578
4_UPTAG0549	4	YLR404W	SEI1	UPTAG0549	-0.456938	-0.33922	-0.585123
1_UPTAG0895	1	YGR227W	DIE2	UPTAG0895	-0.45617	-0.327757	-0.597138
2_UPTAG0861	2	YBL079W	NUP170	UPTAG0861	-0.456051	-0.193947	-0.776584
3_UPTAG0463	3	YGR243W	MPC3	UPTAG0463	-0.455252	-0.328044	-0.594772
1_UPTAG0077	1	YDR476C	YDR476C	UPTAG0077	-0.454347	-0.363211	-0.551631
4_UPTAG0306	4	YBR137W	YBR137W	UPTAG0306	-0.453723	-0.451599	-0.455849
5_UPTAG0128	5	YGL184C	STR3	UPTAG0128	-0.453556	-0.506515	-0.402473
4_UPTAG0474	4	YHR132W-A	IGO2	UPTAG0474	-0.453187	-0.309166	-0.613195
5_UPTAG0469	5	YER175W-A	YER175W-A	UPTAG0469	-0.4513	-0.422901	-0.480269
3_UPTAG0862	3	YAR071W	PHO11	UPTAG0862	-0.449722	-0.585688	-0.325475
4_UPTAG0864	4	YNL067W	RPL9B	UPTAG0864	-0.449663	-0.472815	-0.426877
3_UPTAG0042	3	YBR173C	UMP1	UPTAG0042	-0.4496	-0.319767	-0.592282
4_UPTAG0251	4	YOR093C	YOR093C	UPTAG0251	-0.448271	-0.378577	-0.521504
2_UPTAG0508	2	YNL197C	WHI3	UPTAG0508	-0.448059	-0.343739	-0.560513
4_UPTAG0793	4	YOR276W	CAF20	UPTAG0793	-0.447981	-0.467571	-0.428654
2_UPTAG0304	2	YDR273W	DON1	UPTAG0304	-0.447634	-0.29632	-0.616697
5_UPTAG0711	5	YJL023C	PET130	UPTAG0711	-0.447306	-0.530267	-0.368856
1_UPTAG0017	1	YOR034C	AKR2	UPTAG0017	-0.447179	-0.372789	-0.525614
3_UPTAG0519	3	YHL014C	YLF2	UPTAG0519	-0.447018	-0.322275	-0.583577
3_UPTAG0153	3	YNL121C	TOM70	UPTAG0153	-0.443073	-0.669561	-0.247365
1_UPTAG0667	1	YPL041C	MRX11	UPTAG0667	-0.440147	-0.570948	-0.320226
4_UPTAG0231	4	YNL335W	DDI3	UPTAG0231	-0.438912	-0.824754	-0.134789
1_UPTAG0793	1	YBL007C	SLA1	UPTAG0793	-0.438753	-0.406742	-0.471491
2_UPTAG0509	2	YDL224C	WHI4	UPTAG0509	-0.437824	-0.462427	-0.413634
3_UPTAG0202	3	YPL265W	DIP5	UPTAG0202	-0.436746	-0.4899	-0.385481
2_UPTAG0250	2	YGL229C	SAP4	UPTAG0250	-0.434553	-0.305877	-0.57584
3_UPTAG0943	3	YGR177C	ATF2	UPTAG0943	-0.433697	-0.597024	-0.286994
3_UPTAG0842	3	YLR070C	XYL2	UPTAG0842	-0.433629	-0.302587	-0.577774
2_UPTAG0260	2	YCR008W	SAT4	UPTAG0260	-0.432735	-0.268092	-0.618618
2_UPTAG0016	2	YFL061W	DDI2	UPTAG0016	-0.432341	-0.374159	-0.492969
2_UPTAG0469	2	YLR248W	RCK2	UPTAG0469	-0.432029	-0.414164	-0.450119
2_UPTAG0225	2	YIL066C	RNR3	UPTAG0225	-0.430317	-0.409042	-0.451911
2_UPTAG0593	2	YML088W	UFO1	UPTAG0593	-0.429587	-0.361831	-0.500683
4_UPTAG0850	4	YDR500C	RPL37B	UPTAG0850	-0.428941	-0.495269	-0.365529
1_UPTAG0234	1	YBR264C	YPT10	UPTAG0234	-0.428912	-0.3853	-0.473883
1_UPTAG0092	1	YLR064W	PER33	UPTAG0092	-0.42872	-0.477884	-0.381176
2_UPTAG1051	2	YPR129W	SCD6	UPTAG1051	-0.427025	-0.37373	-0.482364
3_UPTAG0798	3	YOL049W	GSH2	UPTAG0798	-0.426959	-0.508493	-0.349787
1_UPTAG0225	1	YKL079W	SMY1	UPTAG0225	-0.426896	-0.40233	-0.451886
1_UPTAG0362	1	YDR425W	SNX41	UPTAG0362	-0.426765	-0.31879	-0.543479
1_UPTAG1022	1	YDR162C	NBP2	UPTAG1022	-0.426737	-0.482952	-0.372631
2_UPTAG0916	2	YDR259C	YAP6	UPTAG0916	-0.426262	-0.20551	-0.687004
2_UPTAG0295	2	YDR285W	ZIP1	UPTAG0295	-0.42567	-0.42368	-0.427662
3_UPTAG1126	3	YBL029C-A	YBL029C-A	UPTAG1126	-0.425532	-0.424509	-0.426556
5_UPTAG0191	5	YNL220W	ADE12	UPTAG0191	-0.423595	-0.629974	-0.243077
2_UPTAG0476	2	YER144C	UBP5	UPTAG0476	-0.423432	-0.396974	-0.450383
4_UPTAG0345	4	YJR024C	MDE1	UPTAG0345	-0.422508	-0.440035	-0.405191
2_UPTAG0128	2	YDR121W	DPB4	UPTAG0128	-0.422367	-0.39906	-0.446056
5_UPTAG0489	5	YBR168W	PEX32	UPTAG0489	-0.420044	-0.417929	-0.422163
4_UPTAG0432	4	YBR242W	YBR242W	UPTAG0432	-0.419966	-0.353927	-0.489173
3_UPTAG0854	3	YNL241C	ZWF1	UPTAG0854	-0.41954	-0.567055	-0.285718
4_UPTAG0298	4	YDL091C	UBX3	UPTAG0298	-0.418479	-0.342734	-0.498421
5_UPTAG0593	5	YOR032W-A	YOR032W-A	UPTAG0593	-0.415877	-0.367034	-0.466432
1_UPTAG0056	1	YML101C	CUE4	UPTAG0056	-0.415269	-0.329376	-0.506602
5_UPTAG0153	5	YDL215C	GDH2	UPTAG0153	-0.414119	-0.385531	-0.443285
4_UPTAG0826	4	YBR084C-A	RPL19A	UPTAG0826	-0.412428	-0.532538	-0.301553
4_UPTAG0029	4	YDR326C	YSP2	UPTAG0029	-0.41229	-0.317652	-0.513573
3_UPTAG0418	3	YDR529C	QCR7	UPTAG0418	-0.410559	-0.476096	-0.347869
1_UPTAG0764	1	YNL322C	KRE1	UPTAG0764	-0.40967	-0.624045	-0.223067
5_UPTAG0508	5	YGL161C	YIP5	UPTAG0508	-0.408901	-0.241182	-0.598714
4_UPTAG0931	4	YGR084C	MRP13	UPTAG0931	-0.40788	-0.358778	-0.458712
2_UPTAG0816	2	YPL116W	HOS3	UPTAG0816	-0.407411	-0.422941	-0.392046
1_UPTAG0934	1	YDR075W	PPH3	UPTAG0934	-0.405345	-0.418997	-0.391821
3_UPTAG0256	3	YGR281W	YOR1	UPTAG0256	-0.405042	-0.147831	-0.718278
4_UPTAG0437	4	YDL085C-A	YDL085C-A	UPTAG0437	-0.404738	-0.50447	-0.311457
3_UPTAG0029	3	YPL226W	NEW1	UPTAG0029	-0.404282	-0.440051	-0.369379
5_UPTAG0521	5	YJL205C	NCE101	UPTAG0521	-0.403252	-0.508373	-0.305274
2_UPTAG0524	2	YOL006C	TOP1	UPTAG0524	-0.40284	-0.547365	-0.271484
4_UPTAG0667	4	YOR246C	ENV9	UPTAG0667	-0.402707	-0.365043	-0.44138
1_UPTAG0811	1	YDL223C	HBT1	UPTAG0811	-0.402261	-0.2961	-0.516859
5_UPTAG0101	5	YIL020C	HIS6	UPTAG0101	-0.401591	-0.29347	-0.518477
2_UPTAG0931	2	YKL015W	PUT3	UPTAG0931	-0.401567	-0.470318	-0.335943
4_UPTAG0519	4	YOL125W	TRM13	UPTAG0519	-0.401491	-0.304164	-0.505861
4_UPTAG0801	4	YHR205W	SCH9	UPTAG0801	-0.400934	-0.255668	-0.562483
5_UPTAG0209	5	YDR400W	URH1	UPTAG0209	-0.400887	-0.394188	-0.407617
2_UPTAG0366	2	YMR072W	ABF2	UPTAG0366	-0.400637	-0.437539	-0.364656
1_UPTAG0911	1	YBR260C	RGD1	UPTAG0911	-0.400079	-0.33179	-0.471763
4_UPTAG0726	4	YGL004C	RPN14	UPTAG0726	-0.399923	-0.316381	-0.488602
2_UPTAG0176	2	YDR110W	FOB1	UPTAG0176	-0.399221	-0.426949	-0.372017
2_UPTAG1056	2	YOR017W	PET127	UPTAG1056	-0.398783	-0.445556	-0.353478
4_UPTAG0234	4	YNR068C	YNR068C	UPTAG0234	-0.398358	-0.454834	-0.34401
3_UPTAG0869	3	YPL179W	PPQ1	UPTAG0869	-0.397783	-0.408517	-0.387128
1_UPTAG0304	1	YPL112C	PEX25	UPTAG0304	-0.396937	-0.326746	-0.470718
1_UPTAG0993	1	YLR389C	STE23	UPTAG0993	-0.396187	-0.115441	-0.745097
4_UPTAG0607	4	YKR011C	YKR011C	UPTAG0607	-0.395073	-0.429902	-0.361064
5_UPTAG0190	5	YJR133W	XPT1	UPTAG0190	-0.395031	-0.465089	-0.328218
3_UPTAG0524	3	YLR253W	MCP2	UPTAG0524	-0.39446	-0.273245	-0.526802
4_UPTAG0366	4	YLR211C	ATG38	UPTAG0366	-0.394194	-0.324805	-0.467091
2_UPTAG0249	2	YKR028W	SAP190	UPTAG0249	-0.394143	-0.284447	-0.512872
2_UPTAG0308	2	YPL033C	SRL4	UPTAG0308	-0.394065	-0.287737	-0.508858
5_UPTAG0213	5	YOL052C-A	DDR2	UPTAG0213	-0.393742	-0.345207	-0.443967
4_UPTAG0295	4	YPL263C	KEL3	UPTAG0295	-0.393185	-0.561466	-0.242499
4_UPTAG1119	4	YDR268W	MSW1	UPTAG1119	-0.39227	-0.21636	-0.592647
4_UPTAG0664	4	YHR202W	YHR202W	UPTAG0664	-0.392055	-0.499901	-0.291713
4_UPTAG0469	4	YGR042W	YGR042W	UPTAG0469	-0.391708	-0.232732	-0.570396
4_UPTAG1084	4	YOL023W	IFM1	UPTAG1084	-0.39164	-0.554279	-0.245492
3_UPTAG0469	3	YPR061C	JID1	UPTAG0469	-0.391407	-0.376882	-0.40608
2_UPTAG0103	2	YMR109W	MYO5	UPTAG0103	-0.390921	-0.419782	-0.362627
4_UPTAG0153	4	YKL133C	YKL133C	UPTAG0153	-0.390898	-0.334841	-0.44922
4_UPTAG0495	4	YMR009W	ADI1	UPTAG0495	-0.390065	-0.152856	-0.674102
3_UPTAG0712	3	YOR283W	YOR283W	UPTAG0712	-0.389931	-0.39616	-0.383728
2_UPTAG0855	2	YDL088C	ASM4	UPTAG0855	-0.389317	-0.384703	-0.393945
4_UPTAG0951	4	YKL006W	RPL14A	UPTAG0951	-0.389077	-0.155763	-0.667541
5_UPTAG0501	5	YER141W	COX15	UPTAG0501	-0.388528	-0.463564	-0.317204
2_UPTAG0826	2	YGR072W	UPF3	UPTAG0826	-0.387016	-0.384275	-0.389762
1_UPTAG0788	1	YGR229C	SMI1	UPTAG0788	-0.386948	-0.291012	-0.489721
4_UPTAG0888	4	YDL061C	RPS29B	UPTAG0888	-0.386213	-0.238242	-0.551113
3_UPTAG0056	3	YBR132C	AGP2	UPTAG0056	-0.386153	-0.40567	-0.366896
2_UPTAG0979	2	YMR179W	SPT21	UPTAG0979	-0.386115	-0.215787	-0.579279
3_UPTAG0559	3	YER078C	ICP55	UPTAG0559	-0.384837	-0.442288	-0.329588
5_UPTAG0705	5	YGR244C	LSC2	UPTAG0705	-0.384639	-0.340393	-0.430286
1_UPTAG0990	1	YJR036C	HUL4	UPTAG0990	-0.384585	-0.339842	-0.43076
4_UPTAG0501	4	YMR122W-A	YMR122W-A	UPTAG0501	-0.384263	-0.275878	-0.501458
1_UPTAG1103	1	YOR313C	SPS4	UPTAG1103	-0.383986	-0.362337	-0.405965
3_UPTAG0628	3	YGR174C	CBP4	UPTAG0628	-0.383887	-0.688512	-0.132505
5_UPTAG0694	5	YER178W	PDA1	UPTAG0694	-0.382909	-0.29653	-0.47479
2_UPTAG0501	2	YMR100W	MUB1	UPTAG0501	-0.382539	-0.380351	-0.38473
2_UPTAG0412	2	YML027W	YOX1	UPTAG0412	-0.382324	-0.244948	-0.534171
1_UPTAG0258	1	YPL051W	ARL3	UPTAG0258	-0.38126	-0.492563	-0.277932
3_UPTAG0579	3	YDL085W	NDE2	UPTAG0579	-0.380435	-0.576896	-0.207548
1_UPTAG0753	1	YDR351W	SBE2	UPTAG0753	-0.379925	-0.628163	-0.168195
2_UPTAG0453	2	YJL106W	IME2	UPTAG0453	-0.379526	-0.39984	-0.359494
4_UPTAG0522	4	YOR131C	YOR131C	UPTAG0522	-0.378293	-0.326518	-0.431995
4_UPTAG0869	4	YDL083C	RPS16B	UPTAG0869	-0.377775	-0.49886	-0.266071
5_UPTAG0304	5	YGR169C-A	LSO2	UPTAG0304	-0.377715	-0.274482	-0.488909
3_UPTAG0021	3	YIR036C	IRC24	UPTAG0021	-0.377586	-0.376615	-0.378558
5_UPTAG0744	5	YOR068C	VAM10	UPTAG0744	-0.376237	-0.348427	-0.404594
2_UPTAG0113	2	YGR056W	RSC1	UPTAG0113	-0.375954	-0.453112	-0.302715
2_UPTAG1045	2	YKL149C	DBR1	UPTAG1045	-0.375221	-0.37846	-0.371989
1_UPTAG0023	1	YCR104W	PAU3	UPTAG0023	-0.374232	-0.474403	-0.280567
2_UPTAG0071	2	YPL144W	POC4	UPTAG0071	-0.372728	-0.306459	-0.442187
1_UPTAG0778	1	YNL090W	RHO2	UPTAG0778	-0.372661	-0.179487	-0.595759
4_UPTAG0333	4	YHR009C	TDA3	UPTAG0333	-0.372589	-0.411495	-0.334705
3_UPTAG0911	3	YPR026W	ATH1	UPTAG0911	-0.372553	-0.263424	-0.490617
4_UPTAG0895	4	YOR096W	RPS7A	UPTAG0895	-0.372389	-0.22853	-0.532197
3_UPTAG0167	3	YMR177W	MMT1	UPTAG0167	-0.371892	-0.299964	-0.447596
1_UPTAG0424	1	YNL093W	YPT53	UPTAG0424	-0.371267	-0.430885	-0.314016
2_UPTAG0474	2	YGR270W	YTA7	UPTAG0474	-0.370947	-0.234111	-0.522136
4_UPTAG0378	4	YMR184W	ADD37	UPTAG0378	-0.370782	-0.43967	-0.305035
2_UPTAG0495	2	YIL131C	FKH1	UPTAG0495	-0.370603	-0.25301	-0.498637
1_UPTAG0268	1	YOR275C	RIM20	UPTAG0268	-0.370562	-0.232565	-0.523168
2_UPTAG0522	2	YOR038C	HIR2	UPTAG0522	-0.37012	-0.358551	-0.381783
1_UPTAG0862	1	YJL062W	LAS21	UPTAG0862	-0.368538	-0.157405	-0.615955
3_UPTAG0510	3	YJL062W-A	COA3	UPTAG0510	-0.36841	-0.351544	-0.385475
2_UPTAG0936	2	YGL254W	FZF1	UPTAG0936	-0.368194	-0.393625	-0.343204
3_UPTAG1075	3	YGR052W	FMP48	UPTAG1075	-0.367726	-0.421153	-0.316207
1_UPTAG0378	1	YGR239C	PEX21	UPTAG0378	-0.366214	-0.609678	-0.157965
2_UPTAG0269	2	YPR119W	CLB2	UPTAG0269	-0.36583	-0.205998	-0.545601
4_UPTAG0191	4	YML002W	YML002W	UPTAG0191	-0.365492	-0.342425	-0.388933
3_UPTAG0920	3	YHR136C	SPL2	UPTAG0920	-0.365145	-0.371742	-0.358577
4_UPTAG0937	4	YBR146W	MRPS9	UPTAG0937	-0.364802	-0.43796	-0.295176
3_UPTAG0713	3	YLR046C	YLR046C	UPTAG0713	-0.364561	-0.455699	-0.27884
1_UPTAG0861	1	YPL180W	TCO89	UPTAG0861	-0.364469	-0.317652	-0.412856
2_UPTAG0265	2	YBR215W	HPC2	UPTAG0265	-0.364326	-0.0561491	-0.756732
3_UPTAG0187	3	YNR055C	HOL1	UPTAG0187	-0.363448	-0.186172	-0.5656
1_UPTAG0532	1	YFL027C	GYP8	UPTAG0532	-0.363385	-0.323553	-0.404348
1_UPTAG0908	1	YDR483W	KRE2	UPTAG0908	-0.363188	-0.423616	-0.30519
4_UPTAG0273	4	YPL272C	PBI1	UPTAG0273	-0.362881	-0.60676	-0.154329
4_UPTAG0984	4	YDR418W	RPL12B	UPTAG0984	-0.362761	-0.292655	-0.436449
3_UPTAG0806	3	YMR006C	PLB2	UPTAG0806	-0.362429	-0.434512	-0.293776
4_UPTAG1051	4	YLL046C	RNP1	UPTAG1051	-0.361956	-0.461193	-0.269107
3_UPTAG0556	3	YHR117W	TOM71	UPTAG0556	-0.361891	-0.240812	-0.49407
1_UPTAG0523	1	YJR005W	APL1	UPTAG0523	-0.361642	-0.142237	-0.620504
1_UPTAG0283	1	YOL002C	IZH2	UPTAG0283	-0.3614	-0.25691	-0.474052
5_UPTAG0341	5	YKL096C-B	YKL096C-B	UPTAG0341	-0.359467	-0.56591	-0.178901
3_UPTAG0015	3	YKL198C	PTK1	UPTAG0015	-0.358677	-0.480557	-0.246297
3_UPTAG0397	3	YKL055C	OAR1	UPTAG0397	-0.358219	-0.327377	-0.389735
5_UPTAG0176	5	YIL103W	DPH1	UPTAG0176	-0.358054	-0.476155	-0.248894
1_UPTAG0430	1	YOR089C	VPS21	UPTAG0430	-0.356641	-0.347611	-0.365728
1_UPTAG0715	1	YPR122W	AXL1	UPTAG0715	-0.356561	-0.187918	-0.547558
5_UPTAG0219	5	YOL064C	MET22	UPTAG0219	-0.356409	-0.296495	-0.41892
3_UPTAG0008	3	YBL086C	YBL086C	UPTAG0008	-0.355657	-0.485183	-0.236807
2_UPTAG0095	2	YDL179W	PCL9	UPTAG0095	-0.355645	-0.47935	-0.241714
1_UPTAG1025	1	YMR092C	AIP1	UPTAG1025	-0.355572	-0.351786	-0.359367
2_UPTAG0751	2	YBL003C	HTA2	UPTAG0751	-0.355465	-0.212495	-0.514178
4_UPTAG0421	4	YDR003W	RCR2	UPTAG0421	-0.355341	-0.498276	-0.225299
1_UPTAG0488	1	YDR202C	RAV2	UPTAG0488	-0.354944	-0.307974	-0.403495
3_UPTAG0072	3	YCR075C	ERS1	UPTAG0072	-0.353674	-0.0100789	-0.805562
3_UPTAG0930	3	YJL134W	LCB3	UPTAG0930	-0.353314	-0.395599	-0.312233
2_UPTAG0018	2	YJR138W	IML1	UPTAG0018	-0.353254	-0.414561	-0.294445
2_UPTAG0031	2	YMR266W	RSN1	UPTAG0031	-0.353223	-0.306267	-0.401758
3_UPTAG0547	3	YPR013C	CMR3	UPTAG0547	-0.352863	-0.353978	-0.351749
2_UPTAG0784	2	YMR127C	SAS2	UPTAG0784	-0.352171	-0.263005	-0.447213
3_UPTAG0055	3	YNR039C	ZRG17	UPTAG0055	-0.351825	-0.426427	-0.280892
1_UPTAG0605	1	YKR055W	RHO4	UPTAG0605	-0.351095	-0.251565	-0.458003
4_UPTAG0267	4	YPL095C	EEB1	UPTAG0267	-0.350855	-0.556201	-0.171129
2_UPTAG0958	2	YDR457W	TOM1	UPTAG0958	-0.350411	-0.324062	-0.37725
5_UPTAG0710	5	YIL166C	YIL166C	UPTAG0710	-0.350212	-0.43086	-0.273834
5_UPTAG0021	5	YLR438W	CAR2	UPTAG0021	-0.350126	-0.211263	-0.503792
1_UPTAG0593	1	YFR024C-A	LSB3	UPTAG0593	-0.349722	-0.23394	-0.475613
2_UPTAG0513	2	YLR003C	CMS1	UPTAG0513	-0.349034	-0.302206	-0.397433
5_UPTAG0547	5	YNL275W	BOR1	UPTAG0547	-0.34893	-0.239378	-0.46749
2_UPTAG0842	2	YIL079C	AIR1	UPTAG0842	-0.348745	-0.322783	-0.375182
2_UPTAG0070	2	YPL066W	RGL1	UPTAG0070	-0.348437	-0.192047	-0.523864
1_UPTAG0951	1	YHR082C	KSP1	UPTAG0951	-0.347747	-0.270994	-0.428813
1_UPTAG0318	1	YGR133W	PEX4	UPTAG0318	-0.346868	-0.297641	-0.397835
1_UPTAG0055	1	YDR304C	CPR5	UPTAG0055	-0.34535	-0.504069	-0.202375
4_UPTAG0634	4	YDR128W	MTC5	UPTAG0634	-0.344834	-0.618793	-0.114688
3_UPTAG0213	3	YPR124W	CTR1	UPTAG0213	-0.344771	-0.484317	-0.217541
3_UPTAG0774	3	YBR020W	GAL1	UPTAG0774	-0.344417	-0.29109	-0.39979
3_UPTAG0605	3	YPR083W	MDM36	UPTAG0605	-0.344403	-0.297055	-0.393357
1_UPTAG0694	1	YBL028C	YBL028C	UPTAG0694	-0.344109	-0.346865	-0.341358
2_UPTAG0854	2	YMR129W	POM152	UPTAG0854	-0.343519	-0.160076	-0.553732
2_UPTAG0115	2	YOR304W	ISW2	UPTAG0115	-0.343377	-0.272554	-0.417857
5_UPTAG0495	5	YCR020C	PET18	UPTAG0495	-0.343032	-0.385873	-0.301426
3_UPTAG0667	3	YNR041C	COQ2	UPTAG0667	-0.342597	-0.138346	-0.58061
4_UPTAG0513	4	YNL254C	RTC4	UPTAG0513	-0.342573	-0.139741	-0.578661
3_UPTAG0218	3	YEL069C	HXT13	UPTAG0218	-0.342556	-0.341388	-0.343726
2_UPTAG0711	2	YBR239C	ERT1	UPTAG0711	-0.342284	-0.152877	-0.560371
1_UPTAG0824	1	YJL108C	PRM10	UPTAG0824	-0.342032	-0.142295	-0.573936
4_UPTAG0975	4	YLR139C	SLS1	UPTAG0975	-0.341915	-0.277378	-0.409475
3_UPTAG0199	3	YFL055W	AGP3	UPTAG0199	-0.341883	-0.21195	-0.484686
1_UPTAG0245	1	YOR036W	PEP12	UPTAG0245	-0.341208	-0.878603	0.0494451
2_UPTAG0531	2	YGL194C	HOS2	UPTAG0531	-0.341016	-0.363553	-0.318825
4_UPTAG0845	4	YER056C-A	RPL34A	UPTAG0845	-0.341008	-0.326725	-0.355434
3_UPTAG0882	3	YBR058C	UBP14	UPTAG0882	-0.340833	-0.335194	-0.346495
4_UPTAG0512	4	YNL224C	SQS1	UPTAG0512	-0.340405	-0.281065	-0.40229
4_UPTAG0852	4	YJL189W	RPL39	UPTAG0852	-0.340388	-0.48952	-0.205238
4_UPTAG0788	4	YGR171C	MSM1	UPTAG0788	-0.340331	-0.177065	-0.524459
3_UPTAG0027	3	YOR031W	CRS5	UPTAG0027	-0.339376		-0.339376
4_UPTAG0299	4	YAL049C	AIM2	UPTAG0299	-0.339345	-0.304251	-0.375313
4_UPTAG0017	4	YDL237W	AIM6	UPTAG0017	-0.339084	-0.309863	-0.36891
5_UPTAG0225	5	YML082W	YML082W	UPTAG0225	-0.337879	-0.288444	-0.389067
4_UPTAG0898	4	YCR071C	IMG2	UPTAG0898	-0.337788	-0.145074	-0.560272
4_UPTAG0030	4	YDR336W	MRX8	UPTAG0030	-0.337511	-0.448385	-0.234554
2_UPTAG0680	2	YLR256W	HAP1	UPTAG0680	-0.337392	-0.45126	-0.231857
1_UPTAG0751	1	YHR103W	SBE22	UPTAG0751	-0.336475	-0.298553	-0.375422
2_UPTAG0234	2	YOR330C	MIP1	UPTAG0234	-0.336005	-0.260458	-0.415728
3_UPTAG0415	3	YHR001W-A	QCR10	UPTAG0415	-0.334927	-0.346965	-0.322989
1_UPTAG0626	1	YBR210W	ERV15	UPTAG0626	-0.334592	-0.204867	-0.477144
3_UPTAG0489	3	YDR379C-A	SDH6	UPTAG0489	-0.334342	-0.234298	-0.441844
4_UPTAG0694	4	YDR533C	HSP31	UPTAG0694	-0.334212	-0.457763	-0.220411
4_UPTAG1110	4	YOR243C	PUS7	UPTAG1110	-0.334181	-0.352872	-0.315728
5_UPTAG0634	5	YBR200W-A	YBR200W-A	UPTAG0634	-0.334064	-0.62905	-0.089275
4_UPTAG0824	4	YJL177W	RPL17B	UPTAG0824	-0.333963	-0.267159	-0.404011
3_UPTAG0548	3	YPR098C	YPR098C	UPTAG0548	-0.333508	-0.247997	-0.424409
2_UPTAG0023	2	YFR023W	PES4	UPTAG0023	-0.332808	-0.396117	-0.27216
1_UPTAG0180	1	YBR207W	FTH1	UPTAG0180	-0.332752	-0.234132	-0.438612
1_UPTAG0286	1	YHR195W	NVJ1	UPTAG0286	-0.332572	-0.352887	-0.312539
1_UPTAG0663	1	YLR021W	IRC25	UPTAG0663	-0.332075	-0.38656	-0.279573
4_UPTAG0882	4	YGL189C	RPS26A	UPTAG0882	-0.331891	-0.56637	-0.130248
4_UPTAG0956	4	YGL031C	RPL24A	UPTAG0956	-0.331592	-0.289767	-0.374665
5_UPTAG0029	5	YGL148W	ARO2	UPTAG0029	-0.33134	-0.313984	-0.348907
1_UPTAG0190	1	YDR057W	YOS9	UPTAG0190	-0.330634	-0.327535	-0.33374
4_UPTAG0711	4	YMR135C	GID8	UPTAG0711	-0.330176	-0.207528	-0.464228
2_UPTAG0153	2	YNL327W	EGT2	UPTAG0153	-0.329903	-0.327811	-0.331998
3_UPTAG0196	3	YHR127W	YHR127W	UPTAG0196	-0.329422	-0.597876	-0.10317
2_UPTAG0119	2	YDR181C	SAS4	UPTAG0119	-0.329203	-0.262083	-0.399599
4_UPTAG0248	4	YOR019W	YOR019W	UPTAG0248	-0.32891	-0.331509	-0.326317
5_UPTAG0378	5	YMR247W-A	YMR247W-A	UPTAG0378	-0.328367	-0.330153	-0.326584
4_UPTAG0639	4	YNL336W	COS1	UPTAG0639	-0.327846	-0.239034	-0.422487
2_UPTAG0914	2	YPL181W	CTI6	UPTAG0914	-0.327754	-0.26451	-0.393898
1_UPTAG0374	1	YBL069W	AST1	UPTAG0374	-0.327507	-0.233922	-0.427587
3_UPTAG0936	3	YER096W	SHC1	UPTAG0936	-0.327369	-0.445634	-0.218068
2_UPTAG0676	2	YGL078C	DBP3	UPTAG0676	-0.32727	-0.411122	-0.248026
4_UPTAG0135	4	YJL181W	YJL181W	UPTAG0135	-0.327009	-0.218911	-0.443868
5_UPTAG0337	5	YJR085C	YJR085C	UPTAG0337	-0.326949	-0.35545	-0.299001
4_UPTAG0256	4	YOR166C	SWT1	UPTAG0256	-0.326779	-0.234266	-0.425633
1_UPTAG0102	1	YPR114W	YPR114W	UPTAG0102	-0.326751	-0.2258	-0.435301
2_UPTAG0121	2	YJL065C	DLS1	UPTAG0121	-0.326303	-0.222914	-0.437676
5_UPTAG0395	5	YOL097W-A	YOL097W-A	UPTAG0395	-0.326036	-0.275189	-0.378741
2_UPTAG0107	2	YOR191W	ULS1	UPTAG0107	-0.325803	-0.301189	-0.350844
5_UPTAG0430	5	YBL008W-A	YBL008W-A	UPTAG0430	-0.325526	-0.370735	-0.28169
5_UPTAG0417	5	YPL152W-A	YPL152W-A	UPTAG0417	-0.325057	-0.236411	-0.419507
3_UPTAG1085	3	YOL154W	ZPS1	UPTAG1085	-0.324631	-0.214376	-0.444015
4_UPTAG0983	4	YEL054C	RPL12A	UPTAG0983	-0.324594	-0.352093	-0.297609
1_UPTAG1034	1	YER174C	GRX4	UPTAG1034	-0.324528	-0.185037	-0.478963
1_UPTAG0246	1	YDR358W	GGA1	UPTAG0246	-0.323782	-0.44281	-0.21383
4_UPTAG0476	4	YIL092W	YIL092W	UPTAG0476	-0.323698	-0.331425	-0.316013
3_UPTAG0467	3	YLR201C	COQ9	UPTAG0467	-0.323539	-0.455675	-0.202496
1_UPTAG0920	1	YNL169C	PSD1	UPTAG0920	-0.323437	-0.269402	-0.379575
4_UPTAG0555	4	YKR089C	TGL4	UPTAG0555	-0.323376	-0.310666	-0.336199
1_UPTAG0931	1	YNL279W	PRM1	UPTAG0931	-0.32242	-0.229712	-0.421498
2_UPTAG0087	2	YBL067C	UBP13	UPTAG0087	-0.321888	-0.609913	-0.081906
4_UPTAG0547	4	YGR149W	YGR149W	UPTAG0547	-0.320243	-0.353722	-0.287523
4_UPTAG0016	4	YDL186W	YDL186W	UPTAG0016	-0.319416	-0.201423	-0.447925
1_UPTAG0712	1	YMR014W	BUD22	UPTAG0712	-0.318595	-0.384747	-0.255344
3_UPTAG1123	3	YAR064W	YAR064W	UPTAG1123	-0.318408	-0.331259	-0.30567
2_UPTAG0259	2	YJR059W	PTK2	UPTAG0259	-0.318367	-0.0911363	-0.588203
4_UPTAG0696	4	YOL155C	HPF1	UPTAG0696	-0.318273	-0.205829	-0.440226
2_UPTAG1050	2	YPL046C	ELC1	UPTAG1050	-0.31827	-0.423951	-0.219805
1_UPTAG0643	1	YHR149C	SKG6	UPTAG0643	-0.317965	-0.369903	-0.267833
2_UPTAG0066	2	YOL161C	PAU20	UPTAG0066	-0.317747	-0.229487	-0.411761
1_UPTAG0979	1	YIL015W	BAR1	UPTAG0979	-0.317606	-0.146677	-0.511542
5_UPTAG0549	5	YOL162W	YOL162W	UPTAG0549	-0.317458	-0.250317	-0.387877
5_UPTAG0715	5	YJR070C	LIA1	UPTAG0715	-0.317277	-0.36647	-0.269706
1_UPTAG1107	1	YHR004C	NEM1	UPTAG1107	-0.316725	-0.416901	-0.223056
5_UPTAG0127	5	YER091C	MET6	UPTAG0127	-0.316638	-0.437808	-0.20486
3_UPTAG0506	3	YHR032W	ERC1	UPTAG0506	-0.316434	-0.0901526	-0.58493
4_UPTAG0822	4	YDL082W	RPL13A	UPTAG0822	-0.316257	-0.381406	-0.253923
5_UPTAG0552	5	YOR068C	VAM10	UPTAG0552	-0.315682	-0.265162	-0.368037
1_UPTAG0211	1	YLR268W	SEC22	UPTAG0211	-0.315335	-0.348621	-0.282799
3_UPTAG0908	3	YHR104W	GRE3	UPTAG0908	-0.31512	-0.285155	-0.345721
3_UPTAG0022	3	YOR267C	HRK1	UPTAG0022	-0.314782	-0.372228	-0.259536
4_UPTAG0883	4	YER131W	RPS26B	UPTAG0883	-0.314718	-0.0561179	-0.630019
1_UPTAG1043	1	YAL028W	FRT2	UPTAG1043	-0.314523	-0.250969	-0.381006
4_UPTAG0537	4	YPR127W	YPR127W	UPTAG0537	-0.312366	-0.367288	-0.259458
4_UPTAG0960	4	YMR194W	RPL36A	UPTAG0960	-0.31226	-0.222264	-0.408246
4_UPTAG0849	4	YLR185W	RPL37A	UPTAG0849	-0.311376	-0.289597	-0.333487
3_UPTAG0238	3	YOR348C	PUT4	UPTAG0238	-0.310999	-0.386374	-0.239367
4_UPTAG0163	4	YLR012C	YLR012C	UPTAG0163	-0.310616	-0.218327	-0.409215
5_UPTAG0488	5	YBR026C	ETR1	UPTAG0488	-0.310494	-0.486146	-0.153926
1_UPTAG0520	1	YPL259C	APM1	UPTAG0520	-0.310274	-0.0416582	-0.640614
5_UPTAG0071	5	YER175C	TMT1	UPTAG0071	-0.309886	-0.391549	-0.232599
2_UPTAG0707	2	YDL053C	PBP4	UPTAG0707	-0.309594	-0.203824	-0.423736
5_UPTAG0678	5	YAR033W	MST28	UPTAG0678	-0.309216	-0.194445	-0.433912
1_UPTAG0816	1	YAR014C	BUD14	UPTAG0816	-0.308605	-0.208457	-0.416228
4_UPTAG1080	4	YDL130W	RPP1B	UPTAG1080	-0.308372	-0.257617	-0.360979
1_UPTAG0733	1	YLR020C	YEH2	UPTAG0733	-0.308004	-0.178657	-0.4501
3_UPTAG0060	3	YEL065W	SIT1	UPTAG0060	-0.307699		-0.307699
3_UPTAG0398	3	YMR056C	AAC1	UPTAG0398	-0.307685	-0.228076	-0.391944
4_UPTAG1041	4	YKL201C	MNN4	UPTAG1041	-0.307411	-0.318828	-0.296085
3_UPTAG0523	3	YLR193C	UPS1	UPTAG0523	-0.306768	0.0004965	-0.697693
1_UPTAG0790	1	YCL048W	SPS22	UPTAG0790	-0.306674	-0.258641	-0.356362
1_UPTAG0469	1	YEL060C	PRB1	UPTAG0469	-0.306575	-0.390656	-0.227125
5_UPTAG0543	5	YNL101W	AVT4	UPTAG0543	-0.30653	-0.272061	-0.341843
3_UPTAG0115	3	YHR002W	LEU5	UPTAG0115	-0.306338	-0.173647	-0.452481
5_UPTAG0326	5	YIL171W	YIL171W	UPTAG0326	-0.306335	-0.388463	-0.228632
1_UPTAG0237	1	YJL004C	SYS1	UPTAG0237	-0.30598	-0.267967	-0.345023
3_UPTAG0225	3	YHR096C	HXT5	UPTAG0225	-0.305704	-0.315649	-0.295826
5_UPTAG0628	5	YBR072C-A	YBR072C-A	UPTAG0628	-0.30566	-0.36321	-0.250319
4_UPTAG0599	4	YNR004W	SWM2	UPTAG0599	-0.305629	-0.163393	-0.463438
1_UPTAG0730	1	YEL004W	YEA4	UPTAG0730	-0.305052	-0.211691	-0.404876
1_UPTAG1084	1	YHR185C	PFS1	UPTAG1084	-0.3048	-0.371985	-0.240605
5_UPTAG0234	5	YJR156C	THI11	UPTAG0234	-0.304438	-0.375	-0.237166
3_UPTAG0755	3	YMR272C	SCS7	UPTAG0755	-0.30431	-0.241969	-0.369468
1_UPTAG0651	1	YLR213C	CRR1	UPTAG0651	-0.303499	-0.320702	-0.2865
2_UPTAG1121	2	YKL109W	HAP4	UPTAG1121	-0.302457	-0.294495	-0.310463
1_UPTAG0682	1	YGR136W	LSB1	UPTAG0682	-0.301877	-0.19574	-0.416446
4_UPTAG0258	4	YOR223W	DSC3	UPTAG0258	-0.301689	-0.25867	-0.346031
4_UPTAG1014	4	YDR337W	MRPS28	UPTAG1014	-0.301558	-0.418828	-0.193109
1_UPTAG0127	1	YDR033W	MRH1	UPTAG0127	-0.301276	-0.201508	-0.40846
4_UPTAG0548	4	YHR140W	YHR140W	UPTAG0548	-0.300984	-0.278286	-0.324045
1_UPTAG0243	1	YJL222W	VTH2	UPTAG0243	-0.300913	-0.339806	-0.263041
2_UPTAG0187	2	YBR223C	TDP1	UPTAG0187	-0.300802	-0.39788	-0.209846
4_UPTAG0176	4	YLR156W	YLR156W	UPTAG0176	-0.300696	-0.302626	-0.298769
2_UPTAG1041	2	YPL133C	RDS2	UPTAG1041	-0.300591	-0.299477	-0.301707
3_UPTAG0430	3	YCR004C	YCP4	UPTAG0430	-0.299907	-0.0413737	-0.615109
2_UPTAG0180	2	YJR069C	HAM1	UPTAG0180	-0.299656	-0.274972	-0.324769
2_UPTAG0291	2	YBL009W	ALK2	UPTAG0291	-0.299639	-0.0949253	-0.538282
3_UPTAG0494	3	YGL139W	FLC3	UPTAG0494	-0.299499	-0.221	-0.382517
1_UPTAG0176	1	YDR069C	DOA4	UPTAG0176	-0.299449	-0.376409	-0.226388
5_UPTAG0171	5	YPR069C	SPE3	UPTAG0171	-0.298387	-0.34752	-0.250873
2_UPTAG0903	2	YKR092C	SRP40	UPTAG0903	-0.298344	-0.271597	-0.325597
4_UPTAG0834	4	YLR061W	RPL22A	UPTAG0834	-0.297583	-0.280874	-0.314488
3_UPTAG0813	3	YLR258W	GSY2	UPTAG0813	-0.297552	-0.340217	-0.256114
5_UPTAG0211	5	YMR250W	GAD1	UPTAG0211	-0.297248	-0.349153	-0.247144
4_UPTAG0870	4	YML026C	RPS18B	UPTAG0870	-0.297115	-0.475205	-0.138612
5_UPTAG0696	5	YGL051W	MST27	UPTAG0696	-0.296206	-0.363787	-0.23165
3_UPTAG0103	3	YKR106W	GEX2	UPTAG0103	-0.295938	-0.371436	-0.224195
5_UPTAG0506	5	YGL114W	YGL114W	UPTAG0506	-0.29591	-0.305856	-0.286033
1_UPTAG0997	1	YOR032C	HMS1	UPTAG0997	-0.295572	-0.210965	-0.385451
4_UPTAG1081	4	YOL039W	RPP2A	UPTAG1081	-0.295087	-0.169798	-0.4323
2_UPTAG0561	2	YLR263W	RED1	UPTAG0561	-0.294339	-0.281651	-0.30714
5_UPTAG0468	5	YER078W-A	YER078W-A	UPTAG0468	-0.294061	-0.227823	-0.363486
2_UPTAG0167	2	YLR427W	MAG2	UPTAG0167	-0.293633	-0.484852	-0.124818
5_UPTAG0306	5	YGR204C-A	YGR204C-A	UPTAG0306	-0.293202	-0.0922152	-0.526793
2_UPTAG0972	2	YIL010W	DOT5	UPTAG0972	-0.292775	-0.270381	-0.315523
4_UPTAG0210	4	YMR181C	YMR181C	UPTAG0210	-0.292752	-0.275059	-0.310665
1_UPTAG0489	1	YDL185W	VMA1	UPTAG0489	-0.292675	-0.225936	-0.362652
4_UPTAG0881	4	YLR333C	RPS25B	UPTAG0881	-0.29252	-0.238392	-0.348758
4_UPTAG1086	4	YKR026C	GCN3	UPTAG1086	-0.292312	-0.535199	-0.0844841
2_UPTAG0547	2	YNL299W	TRF5	UPTAG0547	-0.292127	-0.328317	-0.256823
1_UPTAG0453	1	YOR016C	ERP4	UPTAG0453	-0.291086	-0.207908	-0.379355
1_UPTAG0351	1	YOR357C	SNX3	UPTAG0351	-0.290965	-0.218168	-0.36763
4_UPTAG0792	4	YKL204W	EAP1	UPTAG0792	-0.290938	-0.214225	-0.371961
4_UPTAG0443	4	YDR031W	MIX14	UPTAG0443	-0.290813	-0.323794	-0.258568
3_UPTAG0481	3	YBR230C	OM14	UPTAG0481	-0.289841	-0.387273	-0.198574
4_UPTAG0893	4	YER102W	RPS8B	UPTAG0893	-0.289761	-0.314112	-0.265815
5_UPTAG0366	5	YLR466C-B	YLR466C-B	UPTAG0366	-0.289666	-0.359613	-0.222954
3_UPTAG0921	3	YOL143C	RIB4	UPTAG0921	-0.289563	-0.463191	-0.134604
2_UPTAG0283	2	YBR258C	SHG1	UPTAG0283	-0.289391	-0.150458	-0.443142
1_UPTAG0796	1	YLR371W	ROM2	UPTAG0796	-0.288947	-0.264871	-0.313431
4_UPTAG0351	4	YKL071W	YKL071W	UPTAG0351	-0.28881	-0.228766	-0.351461
3_UPTAG0513	3	YJL171C	YJL171C	UPTAG0513	-0.288455	-0.489932	-0.111698
5_UPTAG0682	5	YBR185C	MBA1	UPTAG0682	-0.288223	-0.303936	-0.272679
2_UPTAG0475	2	YMR304W	UBP15	UPTAG0475	-0.287667	-0.276088	-0.299339
3_UPTAG1133	3	YBR062C	YBR062C	UPTAG1133	-0.287247	-0.256702	-0.318452
4_UPTAG0943	4	YIL093C	RSM25	UPTAG0943	-0.287157	-0.266082	-0.308545
4_UPTAG0533	4	YPL245W	YPL245W	UPTAG0533	-0.287078	-0.233137	-0.343115
3_UPTAG0081	3	YPR194C	OPT2	UPTAG0081	-0.286747	-0.330262	-0.244506
5_UPTAG0243	5	YNL159C	ASI2	UPTAG0243	-0.286612	-0.212373	-0.364878
4_UPTAG0433	4	YBR281C	DUG2	UPTAG0433	-0.286381	-0.345594	-0.229503
4_UPTAG0989	4	YBR048W	RPS11B	UPTAG0989	-0.286331	-0.280748	-0.291936
3_UPTAG0102	3	YCL073C	GEX1	UPTAG0102	-0.286326	-0.513801	-0.0898806
2_UPTAG0748	2	YNL030W	HHF2	UPTAG0748	-0.285949	-0.277669	-0.294277
3_UPTAG0246	3	YPL036W	PMA2	UPTAG0246	-0.285929	-0.235478	-0.338209
3_UPTAG0723	3	YCR079W	PTC6	UPTAG0723	-0.285732	-0.504261	-0.0959912
5_UPTAG0590	5	YOL166W-A	YOL166W-A	UPTAG0590	-0.285551	-0.209029	-0.36636
4_UPTAG0575	4	YNL249C	MPA43	UPTAG0575	-0.285155	-0.286839	-0.283473
1_UPTAG0079	1	YEL043W	YEL043W	UPTAG0079	-0.285047	-0.297233	-0.272964
3_UPTAG0106	3	YDL054C	MCH1	UPTAG0106	-0.284924	-0.263074	-0.30711
3_UPTAG0533	3	YMR252C	YMR252C	UPTAG0533	-0.284714	-0.472093	-0.118898
4_UPTAG0369	4	YLR287C	YLR287C	UPTAG0369	-0.284713	-0.177782	-0.400208
1_UPTAG0015	1	YER150W	SPI1	UPTAG0015	-0.284694	-0.362395	-0.210965
3_UPTAG0514	3	YJR003C	MRX12	UPTAG0514	-0.284674	-0.408062	-0.171012
2_UPTAG0678	2	YGL173C	XRN1	UPTAG0678	-0.284046	-0.22203	-0.348848
5_UPTAG0301	5	YGR121W-A	YGR121W-A	UPTAG0301	-0.283604	-0.493847	-0.100138
2_UPTAG0270	2	YDL155W	CLB3	UPTAG0270	-0.283493	-0.165212	-0.412343
3_UPTAG0018	3	YDR277C	MTH1	UPTAG0018	-0.282523	-0.409141	-0.166126
2_UPTAG0055	2	YJR142W	YJR142W	UPTAG0055	-0.282382	-0.244755	-0.321017
4_UPTAG0914	4	YMR286W	MRPL33	UPTAG0914	-0.282366	-0.268015	-0.296861
2_UPTAG0851	2	YDR395W	SXM1	UPTAG0851	-0.282221	-0.168016	-0.406249
1_UPTAG0178	1	YAL030W	SNC1	UPTAG0178	-0.282144	-0.195032	-0.374857
4_UPTAG0896	4	YNL096C	RPS7B	UPTAG0896	-0.281804	-0.234141	-0.331096
4_UPTAG0365	4	YLR199C	PBA1	UPTAG0365	-0.281793	-0.118982	-0.465343
5_UPTAG0365	5	YLR464W	YLR464W	UPTAG0365	-0.281748	-0.415463	-0.159381
4_UPTAG0517	4	YOL057W	YOL057W	UPTAG0517	-0.281674	-0.184529	-0.385835
2_UPTAG0755	2	YDR073W	SNF11	UPTAG0755	-0.281008	-0.265681	-0.2965
1_UPTAG0926	1	YBL011W	SCT1	UPTAG0926	-0.280865	-0.30349	-0.258589
1_UPTAG0909	1	YOR099W	KTR1	UPTAG0909	-0.280174	-0.298299	-0.262273
4_UPTAG0187	4	YLR446W	YLR446W	UPTAG0187	-0.280053	-0.29528	-0.264986
4_UPTAG0362	4	YLR126C	YLR126C	UPTAG0362	-0.280013	-0.183953	-0.382928
3_UPTAG0744	3	YIL160C	POT1	UPTAG0744	-0.27935	-0.536877	-0.0609038
2_UPTAG0020	2	YDR383C	NKP1	UPTAG0020	-0.279242	-0.371883	-0.192192
1_UPTAG0404	1	YDR485C	VPS72	UPTAG0404	-0.277963	-0.272223	-0.283727
4_UPTAG0246	4	YOL164W	BDS1	UPTAG0246	-0.277743	-0.260739	-0.294951
4_UPTAG0468	4	YGR017W	YGR017W	UPTAG0468	-0.277698	-0.348922	-0.209825
1_UPTAG0787	1	YOL109W	ZEO1	UPTAG0787	-0.277396	-0.2197	-0.337495
2_UPTAG0713	2	YKR064W	OAF3	UPTAG0713	-0.276521	-0.124316	-0.446699
1_UPTAG0202	1	YIL076W	SEC28	UPTAG0202	-0.276512	-0.196565	-0.361151
4_UPTAG0982	4	YGR085C	RPL11B	UPTAG0982	-0.276223	-0.188466	-0.369666
3_UPTAG0393	3	YKR046C	PET10	UPTAG0393	-0.275985	-0.341259	-0.213537
2_UPTAG1122	2	YGL237C	HAP2	UPTAG1122	-0.275747	-0.181857	-0.376175
2_UPTAG0558	2	YER044C-A	MEI4	UPTAG0558	-0.275173	-0.0766356	-0.50546
3_UPTAG0790	3	YGL062W	PYC1	UPTAG0790	-0.275143	-0.218959	-0.333603
1_UPTAG0373	1	YLL040C	VPS13	UPTAG0373	-0.274758	-0.215339	-0.33673
2_UPTAG1061	2	YKR052C	MRS4	UPTAG1061	-0.274606	-0.242114	-0.307848
1_UPTAG0517	1	YJL178C	ATG27	UPTAG0517	-0.274374	-0.284388	-0.26443
1_UPTAG0326	1	YGR123C	PPT1	UPTAG0326	-0.274098	-0.278392	-0.269818
4_UPTAG0655	4	YNL058C	YNL058C	UPTAG0655	-0.273647	-0.250134	-0.297549
1_UPTAG0194	1	YFL048C	EMP47	UPTAG0194	-0.273275	-0.343754	-0.206079
3_UPTAG0658	3	YDR258C	HSP78	UPTAG0658	-0.273165	-0.140292	-0.419528
3_UPTAG0157	3	YER053C	PIC2	UPTAG0157	-0.273116	-0.42934	-0.132169
3_UPTAG0754	3	YOR100C	CRC1	UPTAG0754	-0.272287	-0.547939	-0.0409482
3_UPTAG0101	3	YAL067C	SEO1	UPTAG0101	-0.272046	-0.466504	-0.100712
1_UPTAG0248	1	YJL029C	VPS53	UPTAG0248	-0.271785	-0.0930161	-0.475881
1_UPTAG0970	1	YNL020C	ARK1	UPTAG0970	-0.271531	-0.333262	-0.212333
2_UPTAG0185	2	YMR156C	TPP1	UPTAG0185	-0.271063	-0.196651	-0.349523
2_UPTAG0519	2	YOR229W	WTM2	UPTAG0519	-0.270746	-0.357759	-0.188683
5_UPTAG0296	5	YGL006W-A	YGL006W-A	UPTAG0296	-0.270716	-0.34982	-0.195725
4_UPTAG0219	4	YMR321C	YMR321C	UPTAG0219	-0.270208	-0.241161	-0.299851
2_UPTAG1026	2	YML051W	GAL80	UPTAG1026	-0.270139	-0.307316	-0.233896
2_UPTAG0955	2	YNL186W	UBP10	UPTAG0955	-0.269878	-0.423373	-0.131155
4_UPTAG0521	4	YOR062C	YOR062C	UPTAG0521	-0.269636	-0.270585	-0.268688
3_UPTAG0728	3	YIL045W	PIG2	UPTAG0728	-0.269444	-0.307247	-0.232606
4_UPTAG0587	4	YHR017W	YSC83	UPTAG0587	-0.268979	-0.402483	-0.146791
3_UPTAG0594	3	YDR296W	MHR1	UPTAG0594	-0.268967	-0.333025	-0.207633
2_UPTAG0030	2	YFR048W	RMD8	UPTAG0030	-0.268809	-0.239487	-0.298739
5_UPTAG0024	5	YML099C	ARG81	UPTAG0024	-0.268717	-0.317627	-0.221411
1_UPTAG0343	1	YLL024C	SSA2	UPTAG0343	-0.26845	-0.101907	-0.456759
4_UPTAG0546	4	YFL034W	MIL1	UPTAG0546	-0.267551	-0.264058	-0.271054
1_UPTAG0163	1	YGR241C	YAP1802	UPTAG0163	-0.266468	-0.172241	-0.367282
1_UPTAG0340	1	YDL122W	UBP1	UPTAG0340	-0.265736	-0.162709	-0.376689
4_UPTAG0238	4	YOL024W	YOL024W	UPTAG0238	-0.265617	-0.119642	-0.428043
2_UPTAG0100	2	YPL089C	RLM1	UPTAG0100	-0.265578	-0.226836	-0.30539
1_UPTAG0760	1	YHR132C	ECM14	UPTAG0760	-0.265423	-0.119351	-0.42797
5_UPTAG0047	5	YGR189C	CRH1	UPTAG0047	-0.265402	-0.249355	-0.281629
3_UPTAG0051	3	YLL055W	YCT1	UPTAG0051	-0.265135	-0.319165	-0.213055
1_UPTAG0586	1	YNL047C	SLM2	UPTAG0586	-0.265101	-0.251735	-0.278592
5_UPTAG0431	5	YBL039W-B	YBL039W-B	UPTAG0431	-0.264972	-0.633734	0.0284605
4_UPTAG1100	4	YGL063W	PUS2	UPTAG1100	-0.264419	-0.235318	-0.294119
2_UPTAG0965	2	YJR132W	NMD5	UPTAG0965	-0.264415	-0.334414	-0.197657
2_UPTAG0837	2	YKL208W	CBT1	UPTAG0837	-0.264239	0.0330436	-0.639114
2_UPTAG0296	2	YIL072W	HOP1	UPTAG0296	-0.264209	-0.266592	-0.261829
4_UPTAG0303	4	YBR025C	OLA1	UPTAG0303	-0.264094	-0.124491	-0.418668
4_UPTAG0377	4	YMR163C	INP2	UPTAG0377	-0.263551	-0.239202	-0.288319
2_UPTAG0008	2	YJL084C	ALY2	UPTAG0008	-0.263397	-0.259112	-0.267695
1_UPTAG0213	1	YMR292W	GOT1	UPTAG0213	-0.26313	-0.268071	-0.258206
5_UPTAG0056	5	YJL070C	YJL070C	UPTAG0056	-0.262809	-0.330105	-0.198512
5_UPTAG0663	5	YER188C-A	YER188C-A	UPTAG0663	-0.262552	-0.252048	-0.273133
1_UPTAG0265	1	YML071C	COG8	UPTAG0265	-0.262225	-0.20597	-0.320764
4_UPTAG0593	4	YPR174C	YPR174C	UPTAG0593	-0.262115	-0.265649	-0.25859
3_UPTAG0849	3	YPR131C	NAT3	UPTAG0849	-0.261819	-0.294725	-0.229646
3_UPTAG0537	3	YNR018W	RCF2	UPTAG0537	-0.26153	-0.178186	-0.349986
1_UPTAG0668	1	YPL077C	YPL077C	UPTAG0668	-0.261454	-0.108532	-0.432529
3_UPTAG0876	3	YOL045W	PSK2	UPTAG0876	-0.261267	-0.224352	-0.299152
4_UPTAG1016	4	YLR192C	HCR1	UPTAG1016	-0.260957	-0.224913	-0.297924
4_UPTAG0770	4	YGR173W	RBG2	UPTAG0770	-0.260855	-0.26092	-0.260789
4_UPTAG0559	4	YDR105C	TMS1	UPTAG0559	-0.260721	-0.332277	-0.192546
5_UPTAG0177	5	YNL316C	PHA2	UPTAG0177	-0.260623	-0.223776	-0.298436
5_UPTAG0218	5	YFR030W	MET10	UPTAG0218	-0.259968	-0.312231	-0.209532
2_UPTAG0494	2	YKL185W	ASH1	UPTAG0494	-0.259925	-0.377865	-0.150903
1_UPTAG0714	1	YJR092W	BUD4	UPTAG0714	-0.259648	-0.710937	0.0836021
4_UPTAG0934	4	YPL013C	MRPS16	UPTAG0934	-0.259639	-0.175162	-0.349373
4_UPTAG0675	4	YPL141C	FRK1	UPTAG0675	-0.25962	-0.145374	-0.383699
4_UPTAG0167	4	YLR049C	YLR049C	UPTAG0167	-0.25957	-0.170639	-0.354346
5_UPTAG0419	5	YPL278C	YPL278C	UPTAG0419	-0.259392	-0.269048	-0.249799
3_UPTAG1129	3	YBL111C	YBL111C	UPTAG1129	-0.259248	-0.136558	-0.39335
5_UPTAG0369	5	YMR001C-A	YMR001C-A	UPTAG0369	-0.258903	-0.246144	-0.271776
3_UPTAG0154	3	YIL134W	FLX1	UPTAG0154	-0.258699	-0.179443	-0.342563
1_UPTAG0623	1	YJR004C	SAG1	UPTAG0623	-0.258508	-0.275842	-0.241379
5_UPTAG0345	5	YLL064C	PAU18	UPTAG0345	-0.258018	-0.206219	-0.311746
4_UPTAG0909	4	YBR282W	MRPL27	UPTAG0909	-0.257942	-0.227911	-0.288612
3_UPTAG0390	3	YOR355W	GDS1	UPTAG0390	-0.257414	-0.0220107	-0.538862
5_UPTAG0613	5	YPR108W-A	YPR108W-A	UPTAG0613	-0.25682	-0.183516	-0.334048
3_UPTAG0249	3	YLL061W	MMP1	UPTAG0249	-0.255003	-0.183628	-0.330094
2_UPTAG0368	2	YML058W	SML1	UPTAG0368	-0.254689	-0.27847	-0.231293
3_UPTAG0180	3	YEL030W	ECM10	UPTAG0180	-0.254557	-0.24787	-0.261274
1_UPTAG0274	1	YLR025W	SNF7	UPTAG0274	-0.254537	-0.316924	-0.194737
1_UPTAG0919	1	YJR073C	OPI3	UPTAG0919	-0.254298	-0.252374	-0.256225
4_UPTAG0199	4	YML119W	YML119W	UPTAG0199	-0.254099	-0.220422	-0.288582
3_UPTAG0916	3	YML070W	DAK1	UPTAG0916	-0.253802	-0.236501	-0.271313
4_UPTAG0316	4	YDR186C	YDR186C	UPTAG0316	-0.253375	-0.313053	-0.196068
3_UPTAG0515	3	YJR111C	YJR111C	UPTAG0515	-0.253105	-0.205577	-0.302253
5_UPTAG0374	5	YMR182W-A	YMR182W-A	UPTAG0374	-0.253011	-0.221375	-0.285357
4_UPTAG0489	4	YLR262C-A	TMA7	UPTAG0489	-0.253002	-0.136202	-0.380098
1_UPTAG1000	1	YDL035C	GPR1	UPTAG1000	-0.252401	-0.256046	-0.248764
2_UPTAG1047	2	YLR418C	CDC73	UPTAG1047	-0.252257	-0.138321	-0.375968
4_UPTAG0839	4	YDR471W	RPL27B	UPTAG0839	-0.251924	-0.120017	-0.397117
3_UPTAG0770	3	YOL136C	PFK27	UPTAG0770	-0.251867	-0.112624	-0.405998
1_UPTAG0433	1	YPL045W	VPS16	UPTAG0433	-0.251854	-0.259643	-0.244107
2_UPTAG0211	2	YML060W	OGG1	UPTAG0211	-0.251814	-0.240886	-0.262826
3_UPTAG0185	3	YOR011W	AUS1	UPTAG0185	-0.251537	-0.324272	-0.182293
4_UPTAG0715	4	YDR018C	YDR018C	UPTAG0715	-0.251409	-0.189566	-0.316022
1_UPTAG1014	1	YLL016W	SDC25	UPTAG1014	-0.251407	-0.303059	-0.201541
4_UPTAG0799	4	YAL026C	DRS2	UPTAG0799	-0.251385	-0.24649	-0.256297
2_UPTAG0021	2	YLR315W	NKP2	UPTAG0021	-0.25109	-0.105403	-0.41316
4_UPTAG0183	4	YLR407W	YLR407W	UPTAG0183	-0.25081	-0.0516507	-0.481934
3_UPTAG1125	3	YAR068W	YAR068W	UPTAG1125	-0.25068	-0.234961	-0.266572
5_UPTAG0675	5	YAL068C	PAU8	UPTAG0675	-0.250452	-0.324689	-0.17985
2_UPTAG0470	2	YGL190C	CDC55	UPTAG0470	-0.250329	-0.111293	-0.404208
4_UPTAG1034	4	YLR178C	TFS1	UPTAG1034	-0.250079	-0.160629	-0.345444
2_UPTAG0719	2	YCR087C-A	YCR087C-A	UPTAG0719	-0.249921	-0.280179	-0.220284
5_UPTAG0533	5	YLR004C	THI73	UPTAG0533	-0.249498	-0.386144	-0.124683
5_UPTAG0718	5	YKL085W	MDH1	UPTAG0718	-0.248994	-0.280517	-0.218145
3_UPTAG0528	3	YLR346C	CIS1	UPTAG0528	-0.248992	-0.243664	-0.254339
2_UPTAG0419	2	YHR086W	NAM8	UPTAG0419	-0.248945	-0.345107	-0.158794
2_UPTAG1069	2	YLR399C	BDF1	UPTAG1069	-0.248837	-0.0895518	-0.427917
4_UPTAG0979	4	YJR145C	RPS4A	UPTAG0979	-0.248626	-0.305326	-0.194071
4_UPTAG0778	4	YLR375W	STP3	UPTAG0778	-0.248506	-0.238646	-0.258434
4_UPTAG0068	4	YFR043C	IRC6	UPTAG0068	-0.24838	-0.285127	-0.212545
5_UPTAG0187	5	YLR209C	PNP1	UPTAG0187	-0.248097	-0.280776	-0.216143
3_UPTAG0696	3	YIL172C	IMA3	UPTAG0696	-0.248067	-0.233947	-0.262326
4_UPTAG0678	4	YPL236C	ENV7	UPTAG0678	-0.247925	-0.179282	-0.319998
5_UPTAG0130	5	YLR180W	SAM1	UPTAG0130	-0.247488	-0.0682985	-0.452134
5_UPTAG0066	5	YBR111C	YSA1	UPTAG0066	-0.247376	-0.192314	-0.304623
2_UPTAG0302	2	YFR046C	CNN1	UPTAG0302	-0.24728	-0.140317	-0.362814
2_UPTAG0266	2	YLR131C	ACE2	UPTAG0266	-0.247223	-0.368736	-0.135154
5_UPTAG0680	5	YBR026C	ETR1	UPTAG0680	-0.247141	-0.0796937	-0.436606
5_UPTAG0437	5	YBR085C-A	YBR085C-A	UPTAG0437	-0.246776	-0.293801	-0.201235
1_UPTAG0143	1	YDR006C	SOK1	UPTAG0143	-0.246152	-0.320391	-0.175548
3_UPTAG1086	3	YLR267W	BOP2	UPTAG1086	-0.245886	-0.242337	-0.249443
2_UPTAG0488	2	YMR154C	RIM13	UPTAG0488	-0.24577	-0.173065	-0.322335
1_UPTAG0943	1	YEL042W	GDA1	UPTAG0943	-0.245389	-0.0621987	-0.45527
4_UPTAG1093	4	YJL138C	TIF2	UPTAG1093	-0.245374	-0.445532	-0.0696329
4_UPTAG0177	4	YLR159W	YLR159W	UPTAG0177	-0.244768	-0.130033	-0.369423
4_UPTAG0641	4	YFL062W	COS4	UPTAG0641	-0.24468	-0.136308	-0.361858
5_UPTAG0055	5	YGR067C	YGR067C	UPTAG0055	-0.244425	-0.17462	-0.31778
3_UPTAG1092	3	YBR007C	DSF2	UPTAG1092	-0.244104	-0.263051	-0.225404
2_UPTAG0358	2	YPL253C	VIK1	UPTAG0358	-0.243999	-0.152075	-0.342181
4_UPTAG0986	4	YGR214W	RPS0A	UPTAG0986	-0.243831	-0.205412	-0.283301
1_UPTAG0377	1	YHR160C	PEX18	UPTAG0377	-0.243686	-0.341617	-0.151982
2_UPTAG0298	2	YGL251C	HFM1	UPTAG0298	-0.243652	0.10522	-0.704746
4_UPTAG0887	4	YLR388W	RPS29A	UPTAG0887	-0.243606	-0.0926935	-0.412168
2_UPTAG0937	2	YDR463W	STP1	UPTAG0937	-0.243441	-0.185063	-0.304281
2_UPTAG0975	2	YNL278W	CAF120	UPTAG0975	-0.243324	-0.293732	-0.194619
2_UPTAG0280	2	YIL112W	HOS4	UPTAG0280	-0.243042	-0.0832135	-0.422808
3_UPTAG0250	3	YDR040C	ENA1	UPTAG0250	-0.242942	-0.155649	-0.33586
2_UPTAG1117	2	YKR034W	DAL80	UPTAG1117	-0.242703	-0.372078	-0.12398
4_UPTAG0515	4	YFL044C	OTU1	UPTAG0515	-0.24267	-0.220161	-0.265536
4_UPTAG0103	4	YHR078W	YHR078W	UPTAG0103	-0.242534	-0.215526	-0.270057
3_UPTAG0527	3	YLR290C	COQ11	UPTAG0527	-0.242416	-0.299826	-0.187204
5_UPTAG0343	5	YKR095W-A	PCC1	UPTAG0343	-0.242402	-0.208167	-0.277469
3_UPTAG0932	3	YOR171C	LCB4	UPTAG0932	-0.242284	-0.324248	-0.164727
3_UPTAG0023	3	YPL026C	SKS1	UPTAG0023	-0.242071	-0.23734	-0.246818
3_UPTAG0177	3	YDR256C	CTA1	UPTAG0177	-0.241974	-0.390018	-0.107718
5_UPTAG0527	5	YKL093W	MBR1	UPTAG0527	-0.241889	-0.445502	-0.0634903
4_UPTAG0195	4	YML050W	AIM32	UPTAG0195	-0.24173	-0.277863	-0.206479
2_UPTAG0552	2	YDR096W	GIS1	UPTAG0552	-0.241228	-0.186141	-0.298503
2_UPTAG0790	2	YBL052C	SAS3	UPTAG0790	-0.240645	-0.129391	-0.3612
5_UPTAG0238	5	YER090W	TRP2	UPTAG0238	-0.240449	-0.247189	-0.233741
4_UPTAG0626	4	YIL096C	BMT5	UPTAG0626	-0.240147	-0.232726	-0.247606
3_UPTAG0931	3	YPL006W	NCR1	UPTAG0931	-0.239248	-0.418663	-0.0796981
4_UPTAG0428	4	YBL059C-A	CMC2	UPTAG0428	-0.239143	-0.345661	-0.139952
4_UPTAG0301	4	YBL055C	YBL055C	UPTAG0301	-0.23904	-0.105413	-0.386318
2_UPTAG0362	2	YDR097C	MSH6	UPTAG0362	-0.238846	-0.295992	-0.183878
5_UPTAG0095	5	YLR017W	MEU1	UPTAG0095	-0.238829	-0.253875	-0.223939
3_UPTAG0499	3	YGR102C	GTF1	UPTAG0499	-0.238772	-0.161868	-0.320007
2_UPTAG0179	2	YMR173W	DDR48	UPTAG0179	-0.238508	-0.253266	-0.2239
4_UPTAG0066	4	YFR035C	YFR035C	UPTAG0066	-0.237858	-0.39298	-0.0978081
2_UPTAG0565	2	YLR233C	EST1	UPTAG0565	-0.237643	-0.25641	-0.219118
1_UPTAG0353	1	YLR121C	YPS3	UPTAG0353	-0.237584	-0.229625	-0.245588
2_UPTAG0371	2	YGL021W	ALK1	UPTAG0371	-0.237527	-0.125571	-0.358908
2_UPTAG0218	2	YIL139C	REV7	UPTAG0218	-0.237491	-0.187295	-0.289497
1_UPTAG0371	1	YJL154C	VPS35	UPTAG0371	-0.237437	-0.107801	-0.379882
1_UPTAG0831	1	YCL027W	FUS1	UPTAG0831	-0.237399	-0.458868	-0.0454463
3_UPTAG0279	3	YDL130W-A	STF1	UPTAG0279	-0.23732	-0.292327	-0.184334
5_UPTAG0208	5	YNR012W	URK1	UPTAG0208	-0.236944	-0.290338	-0.185456
5_UPTAG0008	5	YIR028W	DAL4	UPTAG0008	-0.236933	-0.304149	-0.172709
1_UPTAG0876	1	YMR065W	KAR5	UPTAG0876	-0.236475	-0.241037	-0.231926
2_UPTAG0137	2	YAL019W	FUN30	UPTAG0137	-0.236358	-0.149601	-0.328668
5_UPTAG0535	5	YLR134W	PDC5	UPTAG0535	-0.23626	-0.281699	-0.192208
4_UPTAG1004	4	YPL118W	MRP51	UPTAG1004	-0.236189	-0.348767	-0.131764
4_UPTAG0265	4	YPL039W	YPL039W	UPTAG0265	-0.236047	-0.270019	-0.202856
2_UPTAG0201	2	YHR081W	LRP1	UPTAG0201	-0.235929	-0.218667	-0.253399
2_UPTAG0112	2	YBR245C	ISW1	UPTAG0112	-0.235857	-0.248257	-0.223562
3_UPTAG0787	3	YOL056W	GPM3	UPTAG0787	-0.235712	-0.408048	-0.0817827
1_UPTAG0543	1	YKL176C	LST4	UPTAG0543	-0.234772	-0.120391	-0.359009
1_UPTAG0806	1	YHL028W	WSC4	UPTAG0806	-0.234684	-0.212192	-0.257531
1_UPTAG0499	1	YER072W	VTC1	UPTAG0499	-0.234618	-0.279959	-0.19066
1_UPTAG0899	1	YGL257C	MNT2	UPTAG0899	-0.234249	-0.128675	-0.348162
1_UPTAG0252	1	YOL062C	APM4	UPTAG0252	-0.233185	-0.122573	-0.352988
4_UPTAG0628	4	YDL012C	YDL012C	UPTAG0628	-0.23316	-0.188934	-0.278784
4_UPTAG0056	4	YFL042C	LAM5	UPTAG0056	-0.233039	-0.151748	-0.319186
3_UPTAG0674	3	YOR126C	IAH1	UPTAG0674	-0.232877	-0.199507	-0.267037
4_UPTAG0080	4	YGR016W	YGR016W	UPTAG0080	-0.232526	-0.361867	-0.113833
2_UPTAG0993	2	YBR089C-A	NHP6B	UPTAG0993	-0.232496	-0.140816	-0.330399
1_UPTAG0443	1	YBL075C	SSA3	UPTAG0443	-0.232479	-0.305935	-0.162583
3_UPTAG0071	3	YHR048W	YHK8	UPTAG0071	-0.232428	-0.266371	-0.199265
2_UPTAG0351	2	YJR108W	ABM1	UPTAG0351	-0.232409	-0.263721	-0.201762
3_UPTAG0751	3	YMR207C	HFA1	UPTAG0751	-0.231835	-0.274493	-0.190401
2_UPTAG0006	2	YDR061W	YDR061W	UPTAG0006	-0.231689	-0.712901	0.128534
2_UPTAG0722	2	YDL070W	BDF2	UPTAG0722	-0.231366	-0.195343	-0.268311
4_UPTAG0858	4	YBR031W	RPL4A	UPTAG0858	-0.231301	-0.348775	-0.122676
2_UPTAG0506	2	YBL064C	PRX1	UPTAG0506	-0.231241	-0.0197662	-0.479127
5_UPTAG0724	5	YLL041C	SDH2	UPTAG0724	-0.230995	-0.245338	-0.216795
3_UPTAG0742	3	YGR087C	PDC6	UPTAG0742	-0.230955	-0.345578	-0.124773
1_UPTAG0020	1	YER039C	HVG1	UPTAG0020	-0.230884	-0.197407	-0.265156
4_UPTAG1114	4	YHR163W	SOL3	UPTAG1114	-0.230537	-0.155379	-0.309826
4_UPTAG0769	4	YAL036C	RBG1	UPTAG0769	-0.230412	-0.178302	-0.284475
4_UPTAG0511	4	YNL194C	YNL194C	UPTAG0511	-0.230314	-0.281959	-0.180454
5_UPTAG0740	5	YNR001C	CIT1	UPTAG0740	-0.229882	-0.41909	-0.0626366
1_UPTAG0251	1	YKL179C	COY1	UPTAG0251	-0.229863	-0.516285	0.00900535
4_UPTAG0107	4	YHR177W	YHR177W	UPTAG0107	-0.229804	-0.133901	-0.332538
1_UPTAG0508	1	YOL018C	TLG2	UPTAG0508	-0.2297	-0.305298	-0.157866
1_UPTAG0513	1	YPL232W	SSO1	UPTAG0513	-0.229451	-0.345286	-0.122228
1_UPTAG0375	1	YLR246W	ERF2	UPTAG0375	-0.228873	-0.383449	-0.0892673
5_UPTAG0500	5	YER119C	AVT6	UPTAG0500	-0.228868	-0.127563	-0.337827
1_UPTAG0680	1	YNL040W	YNL040W	UPTAG0680	-0.228351	-0.289773	-0.169438
5_UPTAG0038	5	YLR158C	ASP3-3	UPTAG0038	-0.228331	-0.269231	-0.188558
2_UPTAG0268	2	YGR108W	CLB1	UPTAG0268	-0.227942	-0.0320152	-0.454722
2_UPTAG0292	2	YJR094C	IME1	UPTAG0292	-0.227416	0.145713	-0.732046
5_UPTAG0112	5	YOL061W	PRS5	UPTAG0112	-0.226706	-0.100329	-0.365226
1_UPTAG0988	1	YMR214W	SCJ1	UPTAG0988	-0.22634	-0.293101	-0.162531
2_UPTAG0246	2	YIL135C	VHS2	UPTAG0246	-0.225537	-0.0156578	-0.471233
2_UPTAG1059	2	YDR194C	MSS116	UPTAG1059	-0.225391	-0.307504	-0.1477
1_UPTAG0607	1	YHR114W	BZZ1	UPTAG0607	-0.22529	-0.117669	-0.341591
3_UPTAG0926	3	YLR372W	ELO3	UPTAG0926	-0.225068	-0.518685	0.0187791
3_UPTAG1121	3	YAR061W	YAR061W	UPTAG1121	-0.225064	-0.236781	-0.213441
4_UPTAG0946	4	YJR113C	RSM7	UPTAG0946	-0.224921	-0.216506	-0.233386
4_UPTAG0180	4	YLR241W	CSC1	UPTAG0180	-0.224875	-0.0481383	-0.426326
1_UPTAG0006	1	YHR016C	YSC84	UPTAG0006	-0.224867	-0.93723	0.249886
3_UPTAG0091	3	YDR497C	ITR1	UPTAG0091	-0.224705	-0.251489	-0.19841
1_UPTAG0652	1	YBR033W	EDS1	UPTAG0652	-0.224083	-0.0333768	-0.443895
1_UPTAG0260	1	YGR142W	BTN2	UPTAG0260	-0.224033	-0.181876	-0.267459
2_UPTAG0418	2	YDR150W	NUM1	UPTAG0418	-0.223832	-0.217275	-0.23042
5_UPTAG0030	5	YGL202W	ARO8	UPTAG0030	-0.223775	-0.232661	-0.214943
4_UPTAG1011	4	YCR031C	RPS14A	UPTAG1011	-0.223478	-0.0335886	-0.442204
4_UPTAG0055	4	YFL012W	YFL012W	UPTAG0055	-0.223345	-0.194853	-0.252411
1_UPTAG0299	1	YOR084W	LPX1	UPTAG0299	-0.22317	-0.075093	-0.388203
3_UPTAG0389	3	YHR116W	COX23	UPTAG0389	-0.223065	-0.101155	-0.356236
3_UPTAG1107	3	YDR504C	SPG3	UPTAG1107	-0.222087	-0.311982	-0.137466
3_UPTAG0169	3	YPL135W	ISU1	UPTAG0169	-0.221752	-0.22255	-0.220955
5_UPTAG0195	5	YGL234W	ADE5,7	UPTAG0195	-0.221731	-0.0679783	-0.393846
2_UPTAG0921	2	YMR042W	ARG80	UPTAG0921	-0.221575	-0.168628	-0.27654
1_UPTAG0256	1	YLR039C	RIC1	UPTAG0256	-0.221541	-0.0864833	-0.37056
4_UPTAG0286	4	YJL058C	BIT61	UPTAG0286	-0.221429	-0.209611	-0.233345
5_UPTAG0402	5	YOR034C-A	YOR034C-A	UPTAG0402	-0.221279	-0.225688	-0.216883
3_UPTAG1094	3	YOR183W	FYV12	UPTAG1094	-0.221043	-0.235441	-0.206788
2_UPTAG0841	2	YDL175C	AIR2	UPTAG0841	-0.220997	-0.232121	-0.209958
1_UPTAG0439	1	YGR086C	PIL1	UPTAG0439	-0.220869	-0.0948851	-0.358917
4_UPTAG0755	4	YLR467W	YRF1-5	UPTAG0755	-0.220814	-0.416982	-0.0481544
1_UPTAG0515	1	YGL212W	VAM7	UPTAG0515	-0.220796	-0.067013	-0.39295
1_UPTAG0403	1	YDR200C	VPS64	UPTAG0403	-0.220703	-0.262785	-0.179814
5_UPTAG0418	5	YPL189C-A	COA2	UPTAG0418	-0.220474	-0.317078	-0.129935
4_UPTAG0787	4	YNL073W	MSK1	UPTAG0787	-0.220465	-0.438677	-0.030964
5_UPTAG0435	5	YBR056W-A	YBR056W-A	UPTAG0435	-0.220435	-0.245418	-0.195878
2_UPTAG0437	2	YOR349W	CIN1	UPTAG0437	-0.220237	-0.372951	-0.0821513
4_UPTAG0506	4	YMR315W	YMR315W	UPTAG0506	-0.219954	-0.126168	-0.320263
5_UPTAG0100	5	YLR432W	IMD3	UPTAG0100	-0.219949	-0.309937	-0.135247
2_UPTAG0545	2	YOR043W	WHI2	UPTAG0545	-0.219835	-0.249872	-0.19041
1_UPTAG0882	1	YDR466W	PKH3	UPTAG0882	-0.219266	-0.236448	-0.202286
4_UPTAG0880	4	YGR027C	RPS25A	UPTAG0880	-0.218919	0.0547099	-0.556885
1_UPTAG0468	1	YPL154C	PEP4	UPTAG0468	-0.218724	-0.245107	-0.192814
1_UPTAG0218	1	YHR204W	MNL1	UPTAG0218	-0.218721	-0.045419	-0.415719
4_UPTAG0892	4	YBL072C	RPS8A	UPTAG0892	-0.218578	-0.206497	-0.230761
2_UPTAG0687	2	YNR073C	YNR073C	UPTAG0687	-0.218553	-0.146894	-0.293957
4_UPTAG0102	4	YHR054C	YHR054C	UPTAG0102	-0.218496	-0.202689	-0.234479
2_UPTAG0883	2	YML029W	USA1	UPTAG0883	-0.218307	-0.156625	-0.282745
3_UPTAG0122	3	YOR334W	MRS2	UPTAG0122	-0.218192	-0.417426	-0.0431625
5_UPTAG0373	5	YMR175W-A	YMR175W-A	UPTAG0373	-0.218186	-0.229186	-0.20727
2_UPTAG0499	2	YOL110W	SHR5	UPTAG0499	-0.218086	-0.00477233	-0.468506
4_UPTAG0967	4	YER153C	PET122	UPTAG0967	-0.217887	-0.288671	-0.150413
3_UPTAG0508	3	YIL077C	YIL077C	UPTAG0508	-0.2177	-0.180213	-0.256187
4_UPTAG0046	4	YER051W	JHD1	UPTAG0046	-0.217386	-0.466811	-0.00479398
3_UPTAG0019	3	YPL244C	HUT1	UPTAG0019	-0.217337	-0.419911	-0.0397364
4_UPTAG1052	4	YOL041C	NOP12	UPTAG1052	-0.217108	-0.274604	-0.161815
3_UPTAG0453	3	YJL161W	FMP33	UPTAG0453	-0.217094	-0.181086	-0.254024
1_UPTAG0269	1	YOL116W	MSN1	UPTAG0269	-0.216878	-0.20682	-0.227005
3_UPTAG0691	3	YGR248W	SOL4	UPTAG0691	-0.216859	0.16345	-0.734776
5_UPTAG0299	5	YGL188C-A	YGL188C-A	UPTAG0299	-0.216664	-0.146252	-0.29069
5_UPTAG0081	5	YCL009C	ILV6	UPTAG0081	-0.216631	-0.214164	-0.219103
4_UPTAG1071	4	YOR187W	TUF1	UPTAG1071	-0.216137	-0.302409	-0.134734
4_UPTAG0518	4	YOL092W	YPQ1	UPTAG0518	-0.216129	-0.0761274	-0.371192
4_UPTAG0640	4	YBR302C	COS2	UPTAG0640	-0.215887	-0.186019	-0.246385
2_UPTAG0029	2	YEL072W	RMD6	UPTAG0029	-0.215813	-0.300395	-0.135917
1_UPTAG0625	1	YGL180W	ATG1	UPTAG0625	-0.215642	-0.212244	-0.219047
2_UPTAG0294	2	YPR007C	REC8	UPTAG0294	-0.21496	-0.127523	-0.30804
1_UPTAG0692	1	YDR314C	RAD34	UPTAG0692	-0.214387	-0.11325	-0.323153
4_UPTAG0359	4	YLR063W	BMT6	UPTAG0359	-0.214012	-0.291399	-0.140564
5_UPTAG0558	5	YPR001W	CIT3	UPTAG0558	-0.213861	-0.272946	-0.1571
2_UPTAG0829	2	YPR042C	PUF2	UPTAG0829	-0.21347	-0.326322	-0.108809
4_UPTAG0104	4	YHR100C	GEP4	UPTAG0104	-0.21322	-0.198694	-0.227894
5_UPTAG0227	5	YJR130C	STR2	UPTAG0227	-0.213115	-0.162915	-0.265123
4_UPTAG1088	4	YJR047C	ANB1	UPTAG1088	-0.213015	-0.217853	-0.208194
5_UPTAG0149	5	YFR047C	BNA6	UPTAG0149	-0.212961	-0.261289	-0.1662
1_UPTAG0369	1	YNR006W	VPS27	UPTAG0369	-0.212634	-0.254773	-0.171691
2_UPTAG0067	2	YOR296W	YOR296W	UPTAG0067	-0.212614	-0.184292	-0.241503
2_UPTAG0229	2	YLR135W	SLX4	UPTAG0229	-0.212292	-0.290173	-0.1384
1_UPTAG0200	1	YOR115C	TRS33	UPTAG0200	-0.212135	-0.129349	-0.299963
4_UPTAG0605	4	YJL122W	ALB1	UPTAG0605	-0.212095	-0.134641	-0.293943
4_UPTAG0642	4	YJR161C	COS5	UPTAG0642	-0.212035	-0.210125	-0.213946
3_UPTAG0443	3	YGR033C	TIM21	UPTAG0443	-0.211589	-0.265594	-0.159532
3_UPTAG0195	3	YER048C	CAJ1	UPTAG0195	-0.211326	-0.415039	-0.032851
4_UPTAG0209	4	YMR155W	YMR155W	UPTAG0209	-0.21121	-0.201944	-0.220536
1_UPTAG0357	1	YMR274C	RCE1	UPTAG0357	-0.210938	-0.13271	-0.293652
3_UPTAG0589	3	YOR065W	CYT1	UPTAG0589	-0.210151	-0.289168	-0.135238
3_UPTAG0299	3	YGL006W	PMC1	UPTAG0299	-0.210058	-0.107823	-0.320094
1_UPTAG0115	1	YKL063C	YKL063C	UPTAG0115	-0.209793	-0.398362	-0.0430461
2_UPTAG0543	2	YIL101C	XBP1	UPTAG0543	-0.209484	-0.292098	-0.131345
1_UPTAG0407	1	YGL124C	MON1	UPTAG0407	-0.209399	-0.325394	-0.10204
1_UPTAG1026	1	YPL152W	RRD2	UPTAG1026	-0.209193	-0.124031	-0.2997
2_UPTAG0556	2	YGL170C	SPO74	UPTAG0556	-0.209157	0.00554568	-0.461494
1_UPTAG0688	1	YJL079C	PRY1	UPTAG0688	-0.209015	-0.0571649	-0.378749
5_UPTAG0745	5	YOR125C	CAT5	UPTAG0745	-0.208895	-0.330516	-0.0967343
2_UPTAG0807	2	YIR021W	MRS1	UPTAG0807	-0.208819	-0.258774	-0.160535
5_UPTAG0226	5	YHR112C	YHR112C	UPTAG0226	-0.208692	-0.273081	-0.147055
4_UPTAG0710	4	YCL039W	GID7	UPTAG0710	-0.208493	-0.204867	-0.212128
3_UPTAG0423	3	YDR231C	COX20	UPTAG0423	-0.20845	-0.270335	-0.14911
1_UPTAG0871	1	YDR480W	DIG2	UPTAG0871	-0.208295	-0.559915	0.0741991
3_UPTAG0824	3	YEL071W	DLD3	UPTAG0824	-0.20824	-0.332808	-0.0935779
3_UPTAG1067	3	YJL225C	YJL225C	UPTAG1067	-0.208	-0.121792	-0.299688
5_UPTAG0515	5	YHR150W	PEX28	UPTAG0515	-0.207858	-0.30503	-0.11682
4_UPTAG0101	4	YHR035W	NEL1	UPTAG0101	-0.207813	-0.288136	-0.131728
1_UPTAG0071	1	YBR273C	UBX7	UPTAG0071	-0.207733	-0.155598	-0.261824
5_UPTAG0026	5	YDR035W	ARO3	UPTAG0026	-0.207471	-0.195464	-0.219579
1_UPTAG0113	1	YHR105W	YPT35	UPTAG0113	-0.207197	-0.184012	-0.230761
4_UPTAG0524	4	YOR289W	YOR289W	UPTAG0524	-0.20716	-0.174297	-0.240789
3_UPTAG1150	3	YCL057C-A	MIC10	UPTAG1150	-0.207153	-0.272024	-0.145074
3_UPTAG0570	3	YLL009C	COX17	UPTAG0570	-0.206841	-0.42531	-0.0171463
3_UPTAG1117	3	YAL064C-A	TDA8	UPTAG1117	-0.206709	-0.114765	-0.304915
5_UPTAG0510	5	YGL262W	YGL262W	UPTAG0510	-0.206673	-0.228496	-0.185174
1_UPTAG0070	1	YHR181W	SVP26	UPTAG0070	-0.206627	-0.283729	-0.133436
3_UPTAG0552	3	YGL160W	AIM14	UPTAG0552	-0.206443	-0.16132	-0.253024
2_UPTAG0439	2	YBR057C	MUM2	UPTAG0439	-0.206406	-0.108928	-0.31095
1_UPTAG0195	1	YLR080W	EMP46	UPTAG0195	-0.206393	-0.266416	-0.148767
1_UPTAG1105	1	YAL009W	SPO7	UPTAG1105	-0.206099	-0.41031	-0.0272414
1_UPTAG0511	1	YMR183C	SSO2	UPTAG0511	-0.206021	-0.140937	-0.27418
1_UPTAG0382	1	YJR126C	VPS70	UPTAG0382	-0.205889	-0.202536	-0.209249
2_UPTAG0058	2	YLL007C	LMO1	UPTAG0058	-0.205614	-0.0880383	-0.33363
4_UPTAG0213	4	YMR209C	YMR209C	UPTAG0213	-0.205377	-0.191971	-0.218909
5_UPTAG0295	5	YFR032C-B	YFR032C-B	UPTAG0295	-0.205341	-0.227161	-0.183845
5_UPTAG0210	5	YCR059C	YIH1	UPTAG0210	-0.205227	-0.21548	-0.195047
5_UPTAG0712	5	YJL077C	ICS3	UPTAG0712	-0.205225	-0.185196	-0.225536
5_UPTAG0077	5	YGR286C	BIO2	UPTAG0077	-0.204995	-0.113719	-0.302439
1_UPTAG0807	1	YLR332W	MID2	UPTAG0807	-0.204946	-0.0176138	-0.420285
3_UPTAG1088	3	YGL263W	COS12	UPTAG1088	-0.204929	-0.256106	-0.155505
4_UPTAG0077	4	YGL235W	YGL235W	UPTAG0077	-0.204512	-0.180858	-0.22856
5_UPTAG0180	5	YJR103W	URA8	UPTAG0180	-0.204508	-0.227881	-0.181508
5_UPTAG0641	5	YCL026C-B	HBN1	UPTAG0641	-0.204076	-0.291163	-0.121948
3_UPTAG0794	3	YHR044C	DOG1	UPTAG0794	-0.203985	-0.142886	-0.267786
2_UPTAG0273	2	YJL187C	SWE1	UPTAG0273	-0.203783	-0.1407	-0.269752
2_UPTAG0172	2	YOL090W	MSH2	UPTAG0172	-0.203302	-0.447957	0.00581721
4_UPTAG0621	4	YPL068C	YPL068C	UPTAG0621	-0.203244	0.0414064	-0.498029
1_UPTAG0891	1	YEL036C	ANP1	UPTAG0891	-0.203024	-0.262979	-0.145461
2_UPTAG0535	2	YML058W-A	HUG1	UPTAG0535	-0.202993	-0.0473581	-0.37747
5_UPTAG0031	5	YHR137W	ARO9	UPTAG0031	-0.20229	-0.156771	-0.249293
5_UPTAG0528	5	YKL148C	SDH1	UPTAG0528	-0.202208	-0.221539	-0.183132
3_UPTAG0837	3	YEL047C	FRD1	UPTAG0837	-0.202175	-0.21473	-0.18973
2_UPTAG0256	2	YKR072C	SIS2	UPTAG0256	-0.201964	-0.129741	-0.277994
3_UPTAG0881	3	YJR099W	YUH1	UPTAG0881	-0.20167	-0.259752	-0.145837
4_UPTAG0179	4	YLR173W	YLR173W	UPTAG0179	-0.201368	-0.0630053	-0.354422
4_UPTAG0071	4	YGL108C	YGL108C	UPTAG0071	-0.201348	-0.214591	-0.188226
1_UPTAG0896	1	YKR061W	KTR2	UPTAG0896	-0.201339	-0.0425801	-0.379754
2_UPTAG0772	2	YGL133W	ITC1	UPTAG0772	-0.20125	-0.105149	-0.304212
2_UPTAG0990	2	YNR052C	POP2	UPTAG0990	-0.200899	-0.147159	-0.256718
2_UPTAG0081	2	YPL017C	IRC15	UPTAG0081	-0.200829	-0.186162	-0.215647
3_UPTAG0006	3	YFL010W-A	AUA1	UPTAG0006	-0.200718	0.127397	-0.626127
2_UPTAG0411	2	YDR451C	YHP1	UPTAG0411	-0.200108	-0.106238	-0.300513
3_UPTAG1138	3	YBR219C	YBR219C	UPTAG1138	-0.199848	-0.168552	-0.231839
2_UPTAG0555	2	YDR512C	EMI1	UPTAG0555	-0.199689	-0.28326	-0.120696
4_UPTAG0008	4	YDL057W	YDL057W	UPTAG0008	-0.199671	-0.188982	-0.21044
4_UPTAG0436	4	YDL063C	SYO1	UPTAG0436	-0.199631	-0.406448	-0.018778
5_UPTAG0525	5	YKL034W	TUL1	UPTAG0525	-0.199299	-0.200221	-0.198379
1_UPTAG0881	1	YIL113W	SDP1	UPTAG0881	-0.198714	-0.216852	-0.180802
4_UPTAG0278	4	YPR117W	YPR117W	UPTAG0278	-0.198534	-0.266671	-0.133471
4_UPTAG0860	4	YPL198W	RPL7B	UPTAG0860	-0.19849	-0.0800242	-0.327561
2_UPTAG0782	2	YDL197C	ASF2	UPTAG0782	-0.198388	-0.138059	-0.26135
4_UPTAG0481	4	YJR098C	YJR098C	UPTAG0481	-0.198384	-0.166595	-0.230889
2_UPTAG0596	2	YDL190C	UFD2	UPTAG0596	-0.198095	-0.239177	-0.15815
4_UPTAG0026	4	YDR286C	YDR286C	UPTAG0026	-0.197827	-0.0831924	-0.322362
2_UPTAG0240	2	YCR014C	POL4	UPTAG0240	-0.197803	-0.191229	-0.204408
4_UPTAG0901	4	YNL284C	MRPL10	UPTAG0901	-0.197781	-0.110409	-0.290788
4_UPTAG0781	4	YDR117C	TMA64	UPTAG0781	-0.197707	-0.160515	-0.235884
3_UPTAG0690	3	YDR368W	YPR1	UPTAG0690	-0.197481	0.0407684	-0.483012
4_UPTAG0805	4	YNL209W	SSB2	UPTAG0805	-0.19742	-0.278839	-0.120351
4_UPTAG1075	4	YOR133W	EFT1	UPTAG1075	-0.197218	-0.10948	-0.290638
3_UPTAG0652	3	YKL150W	MCR1	UPTAG0652	-0.197013	-0.119128	-0.279345
1_UPTAG0210	1	YGL200C	EMP24	UPTAG0210	-0.196412	-0.114648	-0.28309
1_UPTAG0303	1	YJL210W	PEX2	UPTAG0303	-0.196145	-0.0485362	-0.360595
4_UPTAG0930	4	YDL045W-A	MRP10	UPTAG0930	-0.195955	-0.1549	-0.238211
1_UPTAG0129	1	YLR151C	PCD1	UPTAG0129	-0.195861	-0.322354	-0.07957
1_UPTAG0980	1	YOR003W	YSP3	UPTAG0980	-0.195721	-0.215918	-0.175802
4_UPTAG0988	4	YDR025W	RPS11A	UPTAG0988	-0.195581	-0.086675	-0.313385
2_UPTAG0874	2	YOR140W	SFL1	UPTAG0874	-0.195542	-0.15143	-0.241045
5_UPTAG0518	5	YIL166C	YIL166C	UPTAG0518	-0.1955	-0.219759	-0.171641
1_UPTAG1095	1	YHR153C	SPO16	UPTAG1095	-0.19533	-0.16207	-0.229374
4_UPTAG1112	4	YNR015W	SMM1	UPTAG1112	-0.195236	-0.190232	-0.200257
3_UPTAG0210	3	YJR160C	MPH3	UPTAG0210	-0.194629	-0.0637907	-0.338528
2_UPTAG0902	2	YLR018C	POM34	UPTAG0902	-0.194437	-0.185126	-0.203808
4_UPTAG0148	4	YKL100C	YPF1	UPTAG0148	-0.194325	-0.1313	-0.26023
2_UPTAG0489	2	YHR134W	WSS1	UPTAG0489	-0.194322	-0.115069	-0.278182
4_UPTAG0203	4	YMR085W	YMR085W	UPTAG0203	-0.194049	-0.205152	-0.183031
3_UPTAG1100	3	YDR475C	JIP4	UPTAG1100	-0.193849	-0.346478	-0.0558337
1_UPTAG0098	1	YPL207W	TYW1	UPTAG0098	-0.193754	-0.129131	-0.261409
3_UPTAG0063	3	YKL174C	TPO5	UPTAG0063	-0.193683	-0.140127	-0.249304
3_UPTAG0919	3	YBR072W	HSP26	UPTAG0919	-0.193604	-0.0316289	-0.376091
1_UPTAG0423	1	YKR014C	YPT52	UPTAG0423	-0.193445	-0.129575	-0.260274
2_UPTAG0685	2	YMR019W	STB4	UPTAG0685	-0.193349	-0.277035	-0.114252
2_UPTAG0487	2	YPL003W	ULA1	UPTAG0487	-0.19328	-0.140484	-0.248082
2_UPTAG0423	2	YLR082C	SRL2	UPTAG0423	-0.19312	-0.194277	-0.191965
1_UPTAG0016	1	YIR039C	YPS6	UPTAG0016	-0.192948	-0.134104	-0.254294
3_UPTAG0511	3	YJL131C	AIM23	UPTAG0511	-0.192469	-0.0551508	-0.344246
1_UPTAG0524	1	YBL037W	APL3	UPTAG0524	-0.192456	-0.134532	-0.252804
4_UPTAG0873	4	YLR441C	RPS1A	UPTAG0873	-0.192397	-0.271273	-0.117611
4_UPTAG0500	4	YMR114C	YMR114C	UPTAG0500	-0.192306	-0.322355	-0.0730165
2_UPTAG0690	2	YKL072W	STB6	UPTAG0690	-0.192222	-0.755181	0.211687
1_UPTAG0770	1	YGR032W	GSC2	UPTAG0770	-0.191995	-0.201206	-0.182842
5_UPTAG0202	5	YML106W	URA5	UPTAG0202	-0.191914	-0.0935101	-0.297524
2_UPTAG1085	2	YPR070W	MED1	UPTAG1085	-0.191841	-0.210644	-0.17328
3_UPTAG0715	3	YLR164W	SHH4	UPTAG0715	-0.191833	-0.079561	-0.313585
3_UPTAG0016	3	YLL019C	KNS1	UPTAG0016	-0.19158	-0.240169	-0.144574
4_UPTAG0190	4	YLR462W	YLR462W	UPTAG0190	-0.191566	-0.1309	-0.254896
1_UPTAG0085	1	YGR263C	SAY1	UPTAG0085	-0.191496	-0.118999	-0.26783
2_UPTAG0077	2	YBR125C	PTC4	UPTAG0077	-0.191484	-0.307902	-0.0837621
4_UPTAG0310	4	YCR095C	OCA4	UPTAG0310	-0.191306	-0.250923	-0.134055
2_UPTAG0007	2	YOL141W	PPM2	UPTAG0007	-0.191124	-0.0870738	-0.303265
3_UPTAG1110	3	YJR114W	YJR114W	UPTAG1110	-0.190834	-0.0425514	-0.356121
3_UPTAG0518	3	YKR070W	YKR070W	UPTAG0518	-0.190831	-0.126498	-0.258166
2_UPTAG0177	2	YHR120W	MSH1	UPTAG0177	-0.190755	-0.036944	-0.362943
1_UPTAG0368	1	YPR173C	VPS4	UPTAG0368	-0.190665	-0.0480705	-0.348915
2_UPTAG0049	2	YEL041W	YEF1	UPTAG0049	-0.190565	-0.0885761	-0.300316
1_UPTAG0729	1	YKL046C	DCW1	UPTAG0729	-0.190186	-0.104843	-0.280897
4_UPTAG0674	4	YBR028C	YPK3	UPTAG0674	-0.18998	-0.129982	-0.252583
3_UPTAG0403	3	YHR051W	COX6	UPTAG0403	-0.189236	-0.0388753	-0.35711
2_UPTAG0833	2	YIR001C	SGN1	UPTAG0833	-0.188949	-0.0866272	-0.299085
1_UPTAG0994	1	YDR251W	PAM1	UPTAG0994	-0.188772	-0.102982	-0.279988
4_UPTAG0058	4	YFL065C	YFL065C	UPTAG0058	-0.188181	-0.340684	-0.050268
2_UPTAG0728	2	YGR071C	ENV11	UPTAG0728	-0.18798	-0.148656	-0.228407
3_UPTAG0764	3	YER183C	FAU1	UPTAG0764	-0.187898	0.00183868	-0.406422
4_UPTAG0276	4	YPR089W	YPR089W	UPTAG0276	-0.187631	-0.330831	-0.0573702
4_UPTAG0271	4	YPL257W	YPL257W	UPTAG0271	-0.187439	-0.235503	-0.140925
2_UPTAG0919	2	YOR298C-A	MBF1	UPTAG0919	-0.187361	-0.111552	-0.267375
2_UPTAG0696	2	YKL222C	YKL222C	UPTAG0696	-0.187245	-0.178119	-0.19643
1_UPTAG0709	1	YLR084C	RAX2	UPTAG0709	-0.187095	-0.214476	-0.160224
2_UPTAG0946	2	YDR422C	SIP1	UPTAG0946	-0.186962	-0.289631	-0.0911169
1_UPTAG0187	1	YNL044W	YIP3	UPTAG0187	-0.186739	-0.146488	-0.228146
4_UPTAG1117	4	YKL205W	LOS1	UPTAG1117	-0.186562	-0.299733	-0.0816256
4_UPTAG0375	4	YMR086W	SEG1	UPTAG0375	-0.186162	-0.0925106	-0.286318
2_UPTAG0786	2	YPL015C	HST2	UPTAG0786	-0.185881	-0.0226851	-0.36992
2_UPTAG0538	2	YIL053W	GPP1	UPTAG0538	-0.185511	-0.0115468	-0.383367
3_UPTAG0130	3	YBR104W	YMC2	UPTAG0130	-0.184953	-0.12761	-0.24467
4_UPTAG0589	4	YMR110C	HFD1	UPTAG0589	-0.184481	-0.011153	-0.381513
4_UPTAG0225	4	YNL034W	YNL034W	UPTAG0225	-0.184389	-0.129303	-0.241662
1_UPTAG0930	1	YDR503C	LPP1	UPTAG0930	-0.184053	-0.156142	-0.212515
1_UPTAG0781	1	YNL029C	KTR5	UPTAG0781	-0.183871	-0.147989	-0.220669
4_UPTAG1056	4	YHR089C	GAR1	UPTAG1056	-0.18304	-0.11694	-0.252315
5_UPTAG0524	5	YKL029C	MAE1	UPTAG0524	-0.182909	-0.257745	-0.111763
2_UPTAG0515	2	YHR152W	SPO12	UPTAG0515	-0.182787	-0.127287	-0.240507
5_UPTAG0623	5	YBL039W-B	YBL039W-B	UPTAG0623	-0.182315	-0.162109	-0.202807
3_UPTAG0675	3	YGR193C	PDX1	UPTAG0675	-0.182196	-0.180119	-0.184276
4_UPTAG1082	4	YDR382W	RPP2B	UPTAG1082	-0.181746	-0.0838624	-0.286756
3_UPTAG0176	3	YGR260W	TNA1	UPTAG0176	-0.181237	-0.0472969	-0.328896
3_UPTAG0561	3	YML042W	CAT2	UPTAG0561	-0.18114	-0.0694574	-0.302199
3_UPTAG1124	3	YAR066W	YAR066W	UPTAG1124	-0.181023	-0.163525	-0.198736
1_UPTAG0599	1	YIL159W	BNR1	UPTAG0599	-0.180843	-0.0478382	-0.327367
5_UPTAG0217	5	YGR208W	SER2	UPTAG0217	-0.180554	-0.195233	-0.166022
4_UPTAG0018	4	YDL241W	YDL241W	UPTAG0018	-0.180339	-0.132445	-0.229878
2_UPTAG0483	2	YDR092W	UBC13	UPTAG0483	-0.180106	-0.141226	-0.220062
1_UPTAG0972	1	YGR262C	BUD32	UPTAG0972	-0.179939	0.00581084	-0.393189
1_UPTAG1009	1	YER109C	FLO8	UPTAG1009	-0.179542	-0.325715	-0.0468267
2_UPTAG0978	2	YGL151W	NUT1	UPTAG0978	-0.179525	0.00410962	-0.38999
5_UPTAG0494	5	YCR005C	CIT2	UPTAG0494	-0.179466	-0.360747	-0.0184424
2_UPTAG0350	2	YHL029C	OCA5	UPTAG0350	-0.179342	-0.195186	-0.16367
1_UPTAG1102	1	YNL294C	RIM21	UPTAG1102	-0.179284	-0.0958478	-0.267844
3_UPTAG0474	3	YLR204W	QRI5	UPTAG0474	-0.179072	-0.0986157	-0.264283
2_UPTAG0079	2	YPL176C	TRE1	UPTAG0079	-0.178956	-0.0192554	-0.358562
4_UPTAG0920	4	YLR439W	MRPL4	UPTAG0920	-0.178939	-0.00717483	-0.373951
3_UPTAG0255	3	YLR237W	THI7	UPTAG0255	-0.17888	-0.107278	-0.254221
2_UPTAG1021	2	YPL127C	HHO1	UPTAG1021	-0.178661	-0.291937	-0.0736344
2_UPTAG0694	2	YJL103C	GSM1	UPTAG0694	-0.17846	-0.18904	-0.167957
2_UPTAG0149	2	YPL018W	CTF19	UPTAG0149	-0.178413	-0.234907	-0.124049
4_UPTAG0085	4	YGR066C	YGR066C	UPTAG0085	-0.178402	-0.206353	-0.150981
4_UPTAG0019	4	YDR034W-B	YDR034W-B	UPTAG0019	-0.178387	-0.180149	-0.176628
2_UPTAG0523	2	YOL012C	HTZ1	UPTAG0523	-0.178169	-0.823966	0.26635
1_UPTAG0833	1	YOR067C	ALG8	UPTAG0833	-0.177921	0.0333219	-0.42549
2_UPTAG0316	2	YNL210W	MER1	UPTAG0316	-0.177803	-0.234783	-0.122988
4_UPTAG0205	4	YMR102C	YMR102C	UPTAG0205	-0.177769	-0.15649	-0.199368
3_UPTAG1103	3	YPL159C	PET20	UPTAG1103	-0.177178	-0.394395	0.0115737
3_UPTAG0212	3	YGL077C	HNM1	UPTAG0212	-0.177006	-0.0930307	-0.266174
4_UPTAG0463	4	YFR044C	DUG1	UPTAG0463	-0.176836	-0.174155	-0.179522
2_UPTAG0510	2	YMR199W	CLN1	UPTAG0510	-0.176798	-0.0747428	-0.286625
1_UPTAG0690	1	YDR233C	RTN1	UPTAG0690	-0.176505	-0.430205	0.0391822
3_UPTAG0435	3	YIL042C	PKP1	UPTAG0435	-0.176368	-0.106125	-0.250206
1_UPTAG0360	1	YBR162W-A	YSY6	UPTAG0360	-0.176225	-0.104834	-0.251332
1_UPTAG0996	1	YPL021W	ECM23	UPTAG0996	-0.176109	-0.111211	-0.244064
5_UPTAG0037	5	YLR157C	ASP3-2	UPTAG0037	-0.176037	-0.211266	-0.141647
3_UPTAG0817	3	YOR347C	PYK2	UPTAG0817	-0.175795	-0.297764	-0.0633392
3_UPTAG0663	3	YNL111C	CYB5	UPTAG0663	-0.175552	-0.352561	-0.0179066
4_UPTAG0854	4	YDL133C-A	RPL41B	UPTAG0854	-0.175491	-0.135957	-0.216138
1_UPTAG0168	1	YDL231C	BRE4	UPTAG0168	-0.175354	-0.175045	-0.175662
3_UPTAG0311	3	YMR243C	ZRC1	UPTAG0311	-0.17519	-0.28678	-0.0716154
2_UPTAG0783	2	YKR101W	SIR1	UPTAG0783	-0.175176	-0.0581479	-0.302541
1_UPTAG0579	1	YOR284W	HUA2	UPTAG0579	-0.175027	-0.256156	-0.0982174
1_UPTAG0964	1	YCR073C	SSK22	UPTAG0964	-0.174884	-0.166677	-0.183137
2_UPTAG1103	2	YNL257C	SIP3	UPTAG1103	-0.174849	-0.342142	-0.0249548
3_UPTAG0433	3	YOL152W	FRE7	UPTAG0433	-0.174142	-0.174208	-0.174077
2_UPTAG0511	2	YDR022C	ATG31	UPTAG0511	-0.173947	-0.342739	-0.0228505
2_UPTAG1017	2	YPL038W	MET31	UPTAG1017	-0.173903	-0.275025	-0.0794071
1_UPTAG0099	1	YPR003C	YPR003C	UPTAG0099	-0.173851	-0.121907	-0.227734
2_UPTAG0198	2	YOR346W	REV1	UPTAG0198	-0.173666	-0.212177	-0.136157
4_UPTAG1103	4	YGL232W	TAN1	UPTAG1103	-0.173654	-0.132242	-0.21629
3_UPTAG0516	3	YKL027W	TCD2	UPTAG0516	-0.173312	-0.246447	-0.103707
3_UPTAG0847	3	YGL067W	NPY1	UPTAG0847	-0.172788	-0.197852	-0.148152
4_UPTAG0021	4	YDR124W	YDR124W	UPTAG0021	-0.172782	-0.0887706	-0.261989
5_UPTAG0509	5	YGL198W	YIP4	UPTAG0509	-0.172669	-0.18418	-0.16125
5_UPTAG0129	5	YNL277W	MET2	UPTAG0129	-0.172528	-0.0551983	-0.30025
4_UPTAG0520	4	YOR006C	TSR3	UPTAG0520	-0.172466	-0.258617	-0.0911705
2_UPTAG0859	2	YKR082W	NUP133	UPTAG0859	-0.172244	-0.00600344	-0.360166
5_UPTAG0681	5	YBR168W	PEX32	UPTAG0681	-0.172192	-0.33699	-0.0243042
1_UPTAG0157	1	YBR283C	SSH1	UPTAG0157	-0.171791	-0.199452	-0.14465
4_UPTAG0023	4	YDR198C	RKM2	UPTAG0023	-0.171733	-0.179718	-0.163793
1_UPTAG0783	1	YBR205W	KTR3	UPTAG0783	-0.171703	-0.0977708	-0.249631
3_UPTAG0604	3	YKL053C-A	MDM35	UPTAG0604	-0.171667	-0.241224	-0.10531
1_UPTAG0148	1	YER083C	GET2	UPTAG0148	-0.171539	-0.447619	0.0600994
4_UPTAG0651	4	YIR014W	YIR014W	UPTAG0651	-0.171066	-0.171847	-0.170285
4_UPTAG0945	4	YGR215W	RSM27	UPTAG0945	-0.171008	-0.0918344	-0.254781
5_UPTAG0113	5	YNL104C	LEU4	UPTAG0113	-0.170874	-0.175027	-0.166733
4_UPTAG1097	4	YOL093W	TRM10	UPTAG1097	-0.170804	-0.177341	-0.164297
1_UPTAG0295	1	YKL209C	STE6	UPTAG0295	-0.170781	-0.224757	-0.118752
4_UPTAG0682	4	YJR014W	TMA22	UPTAG0682	-0.17058	-0.110379	-0.233402
1_UPTAG0941	1	YJL186W	MNN5	UPTAG0941	-0.17035	-0.110498	-0.232793
3_UPTAG0665	3	YGL119W	COQ8	UPTAG0665	-0.170326	-0.261348	-0.0847064
1_UPTAG1074	1	YDR284C	DPP1	UPTAG1074	-0.170306	-0.126335	-0.215659
1_UPTAG0937	1	YER075C	PTP3	UPTAG0937	-0.170187	-0.185172	-0.155356
4_UPTAG0007	4	YDL038C	YDL038C	UPTAG0007	-0.169574	-0.219204	-0.121595
4_UPTAG0712	4	YDR223W	CRF1	UPTAG0712	-0.169137	-0.118847	-0.221244
3_UPTAG0651	3	YHR106W	TRR2	UPTAG0651	-0.16913	-0.304767	-0.0451557
1_UPTAG0466	1	YKR031C	SPO14	UPTAG0466	-0.16887	-0.121029	-0.218351
2_UPTAG1001	2	YHR099W	TRA1	UPTAG1001	-0.16885	-0.208603	-0.130163
5_UPTAG0464	5	YEL073C	YEL073C	UPTAG0464	-0.168435	-0.265314	-0.0776534
1_UPTAG1066	1	YNL145W	MFA2	UPTAG1066	-0.168307	-0.0880048	-0.253344
1_UPTAG0463	1	YDL194W	SNF3	UPTAG0463	-0.168158	-0.247544	-0.0929135
1_UPTAG0761	1	YDR293C	SSD1	UPTAG0761	-0.168138	-0.0563702	-0.289297
2_UPTAG0462	2	YOR039W	CKB2	UPTAG0462	-0.167774	-0.122323	-0.214704
4_UPTAG0263	4	YOR390W	FEX1	UPTAG0263	-0.16766	-0.246956	-0.0924975
3_UPTAG0085	3	YGR055W	MUP1	UPTAG0085	-0.167596	-0.0502627	-0.295324
2_UPTAG0386	2	YML124C	TUB3	UPTAG0386	-0.167576	-0.163749	-0.171414
5_UPTAG0199	5	YJL130C	URA2	UPTAG0199	-0.167494	-0.208264	-0.127844
1_UPTAG0798	1	YER155C	BEM2	UPTAG0798	-0.167066	-0.41275	0.0428041
1_UPTAG0467	1	YNR049C	MSO1	UPTAG0467	-0.167065	-0.150488	-0.183834
3_UPTAG1130	3	YBL112C	YBL112C	UPTAG1130	-0.167063	-0.0804123	-0.259253
2_UPTAG0520	2	YNL078W	NIS1	UPTAG0520	-0.166652	-0.196244	-0.137654
3_UPTAG0891	3	YER059W	PCL6	UPTAG0891	-0.166631	-0.195358	-0.138464
4_UPTAG0332	4	YHL039W	EFM1	UPTAG0332	-0.165497	-0.108972	-0.224327
1_UPTAG0130	1	YMR204C	INP1	UPTAG0130	-0.165332	0.0066036	-0.360566
4_UPTAG0663	4	YKR013W	PRY2	UPTAG0663	-0.164834	-0.182714	-0.147173
3_UPTAG0028	3	YGR088W	CTT1	UPTAG0028	-0.164803	-0.0430701	-0.297761
2_UPTAG1013	2	YPR009W	SUT2	UPTAG1013	-0.164741	0.110762	-0.505577
3_UPTAG0412	3	YMR030W	RSF1	UPTAG0412	-0.164653	-0.125096	-0.205325
3_UPTAG0521	3	YLR091W	GEP5	UPTAG0521	-0.164525	0.0354918	-0.396806
5_UPTAG0303	5	YGR161W-C	YGR161W-C	UPTAG0303	-0.164154	-0.181788	-0.146732
3_UPTAG0535	3	YNL122C	YNL122C	UPTAG0535	-0.163975	0.0142706	-0.36739
1_UPTAG0687	1	YOR304C-A	BIL1	UPTAG0687	-0.162991	-0.143777	-0.182464
4_UPTAG0464	4	YGL082W	YGL082W	UPTAG0464	-0.162968	-0.00645225	-0.338555
5_UPTAG0229	5	YFR055W	IRC7	UPTAG0229	-0.162935	-0.0521841	-0.2829
1_UPTAG0239	1	YPL195W	APL5	UPTAG0239	-0.16264	-0.0767151	-0.254009
5_UPTAG0170	5	YMR020W	FMS1	UPTAG0170	-0.162479	-0.151828	-0.173208
3_UPTAG0239	3	YKR093W	PTR2	UPTAG0239	-0.162398	-0.243757	-0.085383
3_UPTAG0753	3	YJL196C	ELO1	UPTAG0753	-0.162096	-0.387023	0.0324462
3_UPTAG0780	3	YLR377C	FBP1	UPTAG0780	-0.161913	-0.0920928	-0.235286
2_UPTAG0378	2	YOL115W	PAP2	UPTAG0378	-0.161824	-0.339021	-0.00402975
3_UPTAG0487	3	YDL199C	YDL199C	UPTAG0487	-0.161653	-0.178687	-0.144818
4_UPTAG0374	4	YLR437C	DIF1	UPTAG0374	-0.161376	-0.289477	-0.0437267
3_UPTAG0705	3	YOL157C	IMA2	UPTAG0705	-0.161347	-0.0286262	-0.307526
3_UPTAG1081	3	YLR194C	YLR194C	UPTAG1081	-0.161126	-0.418311	0.0570732
2_UPTAG0898	2	YHR165C	PRP8	UPTAG0898	-0.161075	-0.0773692	-0.249938
4_UPTAG0790	4	YPL005W	AEP3	UPTAG0790	-0.161066	0.0236856	-0.373002
3_UPTAG0828	3	YNL045W	LAP2	UPTAG0828	-0.160943	-0.379799	0.0290441
2_UPTAG0427	2	YMR201C	RAD14	UPTAG0427	-0.160666	-0.0306518	-0.303568
3_UPTAG0643	3	YEL059C-A	SOM1	UPTAG0643	-0.159416	-0.126094	-0.193527
4_UPTAG0291	4	YDR152W	GIR2	UPTAG0291	-0.159023	-0.206744	-0.11283
4_UPTAG0707	4	YJR120W	YJR120W	UPTAG0707	-0.158539	-0.103935	-0.215291
2_UPTAG0831	2	YLR363C	NMD4	UPTAG0831	-0.158498	0.0988307	-0.471911
5_UPTAG0657	5	YEL076C	YEL076C	UPTAG0657	-0.158483	-0.129526	-0.188033
5_UPTAG0223	5	YPL273W	SAM4	UPTAG0223	-0.158386	-0.227434	-0.0924913
3_UPTAG0194	3	YOR197W	MCA1	UPTAG0194	-0.157852	-0.0513271	-0.272873
1_UPTAG0022	1	YEL049W	PAU2	UPTAG0022	-0.157838	-0.0253237	-0.303767
4_UPTAG0178	4	YLR161W	YLR161W	UPTAG0178	-0.157743	-0.269083	-0.0543827
3_UPTAG0580	3	YLR087C	CSF1	UPTAG0580	-0.157727	-0.187238	-0.128807
3_UPTAG1080	3	YLR042C	YLR042C	UPTAG1080	-0.157336	-0.385609	0.0397032
1_UPTAG0945	1	YMR101C	SRT1	UPTAG0945	-0.157094	-0.20513	-0.110606
4_UPTAG0499	4	YMR099C	YMR099C	UPTAG0499	-0.157085	-0.237382	-0.0810218
1_UPTAG0182	1	YDR320C	SWA2	UPTAG0182	-0.157082	-0.226803	-0.0905753
1_UPTAG0135	1	YNR028W	CPR8	UPTAG0135	-0.156937	-0.174598	-0.13949
4_UPTAG0049	4	YER128W	VFA1	UPTAG0049	-0.156923	-0.148441	-0.165455
4_UPTAG0154	4	YKL137W	CMC1	UPTAG0154	-0.156892	-0.146607	-0.167252
4_UPTAG1049	4	YFR001W	LOC1	UPTAG1049	-0.15684	-0.212467	-0.103279
2_UPTAG0051	2	YGL242C	YGL242C	UPTAG0051	-0.156787	-0.0676683	-0.251776
5_UPTAG0390	5	YNR075C-A	YNR075C-A	UPTAG0390	-0.156216	-0.0996042	-0.215141
4_UPTAG0201	4	YMR041C	ARA2	UPTAG0201	-0.156102	-0.317093	-0.0112855
5_UPTAG0115	5	YGL009C	LEU1	UPTAG0115	-0.15596	-0.20013	-0.113102
5_UPTAG0061	5	YNR063W	YNR063W	UPTAG0061	-0.155652	-0.0664614	-0.250723
1_UPTAG0311	1	YDR244W	PEX5	UPTAG0311	-0.155621	-0.175934	-0.135589
4_UPTAG0024	4	YDR210W	YDR210W	UPTAG0024	-0.155229	-0.0708175	-0.244887
1_UPTAG0296	1	YDR410C	STE14	UPTAG0296	-0.155107	-0.299107	-0.0241843
2_UPTAG0345	2	YHR157W	REC104	UPTAG0345	-0.155093	-0.00544818	-0.322076
2_UPTAG1075	2	YIR013C	GAT4	UPTAG1075	-0.154852	-0.168354	-0.141476
2_UPTAG0037	2	YEL038W	UTR4	UPTAG0037	-0.154817	-0.110008	-0.201062
1_UPTAG1019	1	YCR097W	HMRA1	UPTAG1019	-0.154814	-0.117929	-0.192667
3_UPTAG0172	3	YER015W	FAA2	UPTAG0172	-0.154792	-0.232041	-0.0814692
1_UPTAG0803	1	YJR137C	MET5	UPTAG0803	-0.154571	-0.206432	-0.104508
3_UPTAG0387	3	YGL191W	COX13	UPTAG0387	-0.154381	-0.170166	-0.138766
1_UPTAG0591	1	YJL100W	LSB6	UPTAG0591	-0.1543	-0.327728	0.000499624
5_UPTAG0487	5	YBL089W	AVT5	UPTAG0487	-0.154086	-0.247125	-0.0666857
1_UPTAG0999	1	YDL024C	DIA3	UPTAG0999	-0.153592	-0.123421	-0.184407
2_UPTAG0318	2	YGR044C	RME1	UPTAG0318	-0.15359	-0.0925707	-0.217305
3_UPTAG0654	3	YDR513W	GRX2	UPTAG0654	-0.153487	-0.0628096	-0.250249
1_UPTAG0984	1	YOR124C	UBP2	UPTAG0984	-0.153342	-0.106126	-0.202157
1_UPTAG1018	1	YDR496C	PUF6	UPTAG1018	-0.153316	-0.191767	-0.115862
3_UPTAG0877	3	YMR139W	RIM11	UPTAG0877	-0.153172	-0.109093	-0.19864
2_UPTAG1110	2	YFL021W	GAT1	UPTAG1110	-0.152808	-0.174647	-0.131294
1_UPTAG0755	1	YLR443W	ECM7	UPTAG0755	-0.152717	-0.113894	-0.192614
1_UPTAG0519	1	YPR029C	APL4	UPTAG0519	-0.152462	-0.040285	-0.274102
1_UPTAG0437	1	YGR231C	PHB2	UPTAG0437	-0.152399	-0.439059	0.0866358
2_UPTAG1071	2	YOR337W	TEA1	UPTAG1071	-0.151977	-0.102648	-0.203053
4_UPTAG0510	4	YNL162W-A	YNL162W-A	UPTAG0510	-0.151847	-0.0206703	-0.296156
2_UPTAG0157	2	YBL061C	SKT5	UPTAG0157	-0.15181	-0.224211	-0.0828697
1_UPTAG0902	1	YAL023C	PMT2	UPTAG0902	-0.151616	-0.268688	-0.0433349
1_UPTAG0029	1	YFL040W	YFL040W	UPTAG0029	-0.151581	-0.228348	-0.078693
3_UPTAG0258	3	YHL016C	DUR3	UPTAG0258	-0.151516	-0.100383	-0.204528
5_UPTAG0377	5	YMR242W-A	YMR242W-A	UPTAG0377	-0.150867	-0.209874	-0.0941782
2_UPTAG0800	2	YGL222C	EDC1	UPTAG0800	-0.150839	-0.0943821	-0.209595
1_UPTAG1097	1	YIL099W	SGA1	UPTAG1097	-0.150493	-0.111013	-0.191085
3_UPTAG0441	3	YKR016W	MIC60	UPTAG0441	-0.150431	-0.141435	-0.159484
2_UPTAG0709	2	YBR150C	TBS1	UPTAG0709	-0.150247	-0.177423	-0.123573
3_UPTAG0483	3	YCL044C	MGR1	UPTAG0483	-0.150201	-0.264409	-0.0443741
1_UPTAG0480	1	YPR036W	VMA13	UPTAG0480	-0.150145	-0.0648452	-0.240807
1_UPTAG0196	1	YML067C	ERV41	UPTAG0196	-0.1496	-0.258508	-0.0483399
5_UPTAG0206	5	YHR144C	DCD1	UPTAG0206	-0.148666	-0.137803	-0.159612
3_UPTAG0303	3	YOL119C	MCH4	UPTAG0303	-0.148568	-0.176026	-0.121623
2_UPTAG0032	2	YGL056C	SDS23	UPTAG0032	-0.148509	-0.0610863	-0.241573
4_UPTAG1043	4	YLR221C	RSA3	UPTAG1043	-0.148421	-0.0984739	-0.200159
4_UPTAG0744	4	YLL063C	AYT1	UPTAG0744	-0.148411	-0.0980837	-0.200559
5_UPTAG0020	5	YJL088W	ARG3	UPTAG0020	-0.148284	-0.0934402	-0.205295
3_UPTAG0807	3	YMR311C	GLC8	UPTAG0807	-0.148037	-0.0680254	-0.232748
3_UPTAG0701	3	YKL124W	SSH4	UPTAG0701	-0.147639	-0.15806	-0.137292
2_UPTAG0347	2	YHR079C-A	SAE3	UPTAG0347	-0.147553	-0.119067	-0.176614
5_UPTAG0746	5	YOR136W	IDH2	UPTAG0746	-0.147471	-0.106752	-0.189373
3_UPTAG0909	3	YDR001C	NTH1	UPTAG0909	-0.147434	-0.0749229	-0.223782
3_UPTAG0182	3	YDR011W	SNQ2	UPTAG0182	-0.147304	-0.0831259	-0.214471
1_UPTAG0640	1	YDR348C	PAL1	UPTAG0640	-0.147119	-0.0403652	-0.262409
4_UPTAG0514	4	YNR009W	NRM1	UPTAG0514	-0.147059	0.0457505	-0.369672
1_UPTAG0090	1	YLL023C	POM33	UPTAG0090	-0.14702	-0.117099	-0.177574
4_UPTAG0092	4	YGR168C	YGR168C	UPTAG0092	-0.14699	-0.103904	-0.191403
2_UPTAG0464	2	YPR111W	DBF20	UPTAG0464	-0.146637	-0.0523554	-0.247514
1_UPTAG0018	1	YHR057C	CPR2	UPTAG0018	-0.146517	-0.240622	-0.0581763
3_UPTAG0781	3	YKR097W	PCK1	UPTAG0781	-0.146456	-0.111657	-0.182115
4_UPTAG0283	4	YNR065C	YNR065C	UPTAG0283	-0.14633	-0.0672301	-0.230019
2_UPTAG0514	2	YAL024C	LTE1	UPTAG0514	-0.145286	-0.102512	-0.189367
4_UPTAG0127	4	YJL027C	YJL027C	UPTAG0127	-0.145093	-0.110987	-0.180025
5_UPTAG0516	5	YIL014C-A	YIL014C-A	UPTAG0516	-0.144551	-0.0922807	-0.198787
3_UPTAG0400	3	YPL132W	COX11	UPTAG0400	-0.144319	-0.167168	-0.121826
3_UPTAG0206	3	YGR224W	AZR1	UPTAG0206	-0.144319	-0.0250531	-0.274339
1_UPTAG0253	1	YJL044C	GYP6	UPTAG0253	-0.144133	-0.100326	-0.189313
1_UPTAG0949	1	YNL219C	ALG9	UPTAG0949	-0.144099	-0.0452094	-0.250268
3_UPTAG0668	3	YBR003W	COQ1	UPTAG0668	-0.14408	-0.17364	-0.115114
2_UPTAG0752	2	YBL002W	HTB2	UPTAG0752	-0.144039	-0.0901109	-0.200061
2_UPTAG0525	2	YPR023C	EAF3	UPTAG0525	-0.143825	-0.165531	-0.122442
2_UPTAG0732	2	YEL018W	EAF5	UPTAG0732	-0.143731	-0.143458	-0.144005
4_UPTAG0779	4	YER087W	AIM10	UPTAG0779	-0.143647	-0.218309	-0.0726586
5_UPTAG0604	5	YOR394C-A	YOR394C-A	UPTAG0604	-0.143573	-0.287215	-0.0129467
5_UPTAG0427	5	YAL063C-A	YAL063C-A	UPTAG0427	-0.143492	-0.153034	-0.134014
4_UPTAG0658	4	YNL305C	BXI1	UPTAG0658	-0.143418	-0.189676	-0.0985964
4_UPTAG0070	4	YGL050W	TYW3	UPTAG0070	-0.143333	-0.325205	0.0181576
3_UPTAG0517	3	YKL162C	YKL162C	UPTAG0517	-0.143019	0.00128394	-0.303377
5_UPTAG0428	5	YAL067W-A	YAL067W-A	UPTAG0428	-0.142463	-0.0299746	-0.264469
4_UPTAG0541	4	YCL028W	RNQ1	UPTAG0541	-0.142295	-0.094544	-0.191681
2_UPTAG0284	2	YKL017C	HCS1	UPTAG0284	-0.142262	-0.0331776	-0.260273
4_UPTAG0745	4	YBR203W	COS111	UPTAG0745	-0.14187	-0.0154183	-0.28048
3_UPTAG0476	3	YGL107C	RMD9	UPTAG0476	-0.141614	-0.0574361	-0.231009
4_UPTAG0886	4	YLR264W	RPS28B	UPTAG0886	-0.141516	-0.234565	-0.0541061
4_UPTAG1085	4	YGR054W	YGR054W	UPTAG1085	-0.141344	-0.0370631	-0.253755
1_UPTAG0826	1	YPL156C	PRM4	UPTAG0826	-0.141188	-0.165433	-0.117344
5_UPTAG0713	5	YJL205C	NCE101	UPTAG0713	-0.141135	-0.159033	-0.123456
4_UPTAG0833	4	YPL079W	RPL21B	UPTAG0833	-0.140804	-0.176645	-0.105832
2_UPTAG0374	2	YMR294W	JNM1	UPTAG0374	-0.140492	-0.121013	-0.160238
5_UPTAG0513	5	YGR244C	LSC2	UPTAG0513	-0.140475	-0.105302	-0.176526
5_UPTAG0230	5	YPL214C	THI6	UPTAG0230	-0.140373	-0.128296	-0.152553
5_UPTAG0556	5	YPL187W	MF(ALPHA)1	UPTAG0556	-0.140184	-0.139183	-0.141186
3_UPTAG1084	3	YBR162C	TOS1	UPTAG1084	-0.140061	-0.301725	0.00529917
5_UPTAG0620	5	YAL067W-A	YAL067W-A	UPTAG0620	-0.140001	-0.154745	-0.125407
3_UPTAG0420	3	YGR183C	QCR9	UPTAG0420	-0.139979	-0.082379	-0.199975
1_UPTAG0765	1	YKL163W	PIR3	UPTAG0765	-0.13993	0.0258214	-0.327226
5_UPTAG0240	5	YGL026C	TRP5	UPTAG0240	-0.139507	-0.125221	-0.153937
2_UPTAG0913	2	YKL214C	YRA2	UPTAG0913	-0.139314	-0.0580303	-0.225452
4_UPTAG0211	4	YMR187C	YMR187C	UPTAG0211	-0.139302	-0.0885298	-0.191927
1_UPTAG0216	1	YDR108W	TRS85	UPTAG0216	-0.139225	-0.0874036	-0.192977
4_UPTAG0078	4	YGL258W-A	YGL258W-A	UPTAG0078	-0.139222	-0.291315	-0.00164482
2_UPTAG0952	2	YGL213C	SKI8	UPTAG0952	-0.139141	-0.108162	-0.1708
3_UPTAG0571	3	YAL039C	CYC3	UPTAG0571	-0.138811	-0.0387175	-0.24637
2_UPTAG0484	2	YEL012W	UBC8	UPTAG0484	-0.138452	-0.0960811	-0.182105
3_UPTAG1082	3	YNL300W	TOS6	UPTAG1082	-0.138233	-0.223151	-0.0580359
1_UPTAG0207	1	YDL137W	ARF2	UPTAG0207	-0.137933	-0.404989	0.0873247
1_UPTAG1052	1	YDR184C	ATC1	UPTAG1052	-0.137925	-0.132402	-0.14347
2_UPTAG0559	2	YGL033W	HOP2	UPTAG0559	-0.137819	-0.171051	-0.105335
1_UPTAG1021	1	YPL004C	LSP1	UPTAG1021	-0.137797	-0.0549989	-0.225637
1_UPTAG1092	1	YER132C	PMD1	UPTAG1092	-0.137729	-0.0681936	-0.210786
2_UPTAG0806	2	YPR134W	MSS18	UPTAG0806	-0.137198	-0.0849558	-0.191404
1_UPTAG0230	1	YBL106C	SRO77	UPTAG0230	-0.137127	0.0474518	-0.348835
3_UPTAG0941	3	YDL019C	OSH2	UPTAG0941	-0.135969	-0.316262	0.0242746
4_UPTAG0202	4	YMR084W	YMR084W	UPTAG0202	-0.135946	-0.17189	-0.100875
4_UPTAG0397	4	YPL009C	RQC2	UPTAG0397	-0.135728	-0.0454022	-0.232089
3_UPTAG0066	3	YJR040W	GEF1	UPTAG0066	-0.135347	-0.163557	-0.107678
1_UPTAG0457	1	YDR229W	IVY1	UPTAG0457	-0.135144	0.00640972	-0.292112
2_UPTAG0764	2	YDL002C	NHP10	UPTAG0764	-0.134674	-0.468333	0.136129
2_UPTAG0146	2	YAR018C	KIN3	UPTAG0146	-0.134665	-0.0707391	-0.201555
3_UPTAG1108	3	YMR107W	SPG4	UPTAG1108	-0.134351	-0.0781557	-0.192823
2_UPTAG0322	2	YIL132C	CSM2	UPTAG0322	-0.13435	-0.0611955	-0.211413
1_UPTAG0577	1	YBL015W	ACH1	UPTAG0577	-0.134347	-0.0998895	-0.169648
1_UPTAG1110	1	YIR026C	YVH1	UPTAG1110	-0.134243	0.00671381	-0.290478
3_UPTAG0659	3	YGL064C	MRH4	UPTAG0659	-0.134197	-0.252661	-0.0247257
5_UPTAG0034	5	YGR124W	ASN2	UPTAG0034	-0.133849	-0.309929	0.0230587
4_UPTAG0508	4	YNL155W	CUZ1	UPTAG0508	-0.133328	-0.114163	-0.152751
5_UPTAG0481	5	YAL014C	SYN8	UPTAG0481	-0.133047	-0.169737	-0.0972679
3_UPTAG1097	3	YOL063C	CRT10	UPTAG1097	-0.13282	-0.126849	-0.138815
2_UPTAG0945	2	YGL208W	SIP2	UPTAG0945	-0.132816	0.0112616	-0.292895
5_UPTAG0139	5	YPR167C	MET16	UPTAG0139	-0.132788	-0.139508	-0.1261
3_UPTAG0595	3	YDL142C	CRD1	UPTAG0595	-0.132788	-0.188243	-0.0793856
3_UPTAG0253	3	YLR092W	SUL2	UPTAG0253	-0.132767	-0.0607067	-0.208616
2_UPTAG0394	2	YNL116W	DMA2	UPTAG0394	-0.132643	-0.0792664	-0.188071
2_UPTAG0478	2	YOR027W	STI1	UPTAG0478	-0.132495	-0.0221927	-0.251934
4_UPTAG0526	4	YOR342C	YOR342C	UPTAG0526	-0.132477	-0.132874	-0.13208
4_UPTAG0625	4	YDR514C	YDR514C	UPTAG0625	-0.132475	-0.255951	-0.0187388
2_UPTAG1100	2	YBL103C	RTG3	UPTAG1100	-0.132331	-0.107353	-0.157749
3_UPTAG0656	3	YNL234W	YNL234W	UPTAG0656	-0.131849	-0.0735675	-0.192583
1_UPTAG0046	1	YER101C	AST2	UPTAG0046	-0.13113	-0.236534	-0.0329048
4_UPTAG0597	4	YIL127C	RRT14	UPTAG0597	-0.13112	-0.0424826	-0.225562
3_UPTAG0783	3	YGR192C	TDH3	UPTAG0783	-0.130998	-0.158503	-0.104009
4_UPTAG0722	4	YPL052W	OAZ1	UPTAG0722	-0.130806	-0.0489089	-0.217633
3_UPTAG0956	3	YPL258C	THI21	UPTAG0956	-0.130599	-0.190051	-0.0735
4_UPTAG0723	4	YPR151C	SUE1	UPTAG0723	-0.130511	-0.0869101	-0.175471
5_UPTAG0639	5	YCL012C	YCL012C	UPTAG0639	-0.130508	-0.0886604	-0.173605
4_UPTAG0916	4	YBR122C	MRPL36	UPTAG0916	-0.130503	-0.0834002	-0.179195
4_UPTAG0441	4	YDL156W	CMR1	UPTAG0441	-0.130358	-0.163429	-0.0980281
3_UPTAG0741	3	YLR251W	SYM1	UPTAG0741	-0.130298	-0.0781418	-0.184411
5_UPTAG0335	5	YJL136W-A	YJL136W-A	UPTAG0335	-0.130281	-0.00487751	-0.267632
3_UPTAG0025	3	YNL264C	PDR17	UPTAG0025	-0.129952	-0.0266299	-0.241248
1_UPTAG0464	1	YLR330W	CHS5	UPTAG0464	-0.129784	-0.210513	-0.0533337
5_UPTAG0092	5	YDL171C	GLT1	UPTAG0092	-0.129779	-0.164086	-0.0962689
2_UPTAG0329	2	YFL003C	MSH4	UPTAG0329	-0.12974	-0.0135775	-0.256081
1_UPTAG0961	1	YOR231W	MKK1	UPTAG0961	-0.129518	-0.215716	-0.0481812
1_UPTAG0967	1	YJL095W	BCK1	UPTAG0967	-0.129394	-0.007524	-0.262517
1_UPTAG0874	1	YOR080W	DIA2	UPTAG0874	-0.128945	-0.0465146	-0.216372
3_UPTAG0692	3	YHR215W	PHO12	UPTAG0692	-0.128604	-0.216993	-0.04532
5_UPTAG0085	5	YAL060W	BDH1	UPTAG0085	-0.128322	-0.134701	-0.12197
3_UPTAG0786	3	YDL021W	GPM2	UPTAG0786	-0.128297	-0.201862	-0.0583006
3_UPTAG0843	3	YDR315C	IPK1	UPTAG0843	-0.128101	-0.162637	-0.0943726
1_UPTAG1091	1	YNL204C	SPS18	UPTAG1091	-0.127709	-0.488585	0.160718
1_UPTAG0985	1	YER151C	UBP3	UPTAG0985	-0.12739	-0.152711	-0.102505
1_UPTAG0642	1	YPL221W	FLC1	UPTAG0642	-0.127381	-0.485666	0.159392
4_UPTAG0296	4	YDL167C	NRP1	UPTAG0296	-0.127015	-0.112807	-0.141364
3_UPTAG0175	3	YJL094C	KHA1	UPTAG0175	-0.126933	-0.245331	-0.0175185
3_UPTAG0730	3	YGR043C	NQM1	UPTAG0730	-0.126846	-0.192967	-0.0636229
1_UPTAG0345	1	YOL088C	MPD2	UPTAG0345	-0.12678	0.000343146	-0.266197
4_UPTAG0623	4	YGR275W	RTT102	UPTAG0623	-0.126575	-0.0915667	-0.162454
4_UPTAG0832	4	YBR191W	RPL21A	UPTAG0832	-0.126287	-0.126287
3_UPTAG0148	3	YGR028W	MSP1	UPTAG0148	-0.126127	-0.277608	0.010949
2_UPTAG0406	2	YBR158W	AMN1	UPTAG0406	-0.126107	-0.175047	-0.0787736
5_UPTAG0070	5	YOR251C	TUM1	UPTAG0070	-0.126051	-0.0894006	-0.163656
3_UPTAG0833	3	YBR299W	MAL32	UPTAG0833	-0.125887	0.000157216	-0.264007
2_UPTAG0533	2	YPL022W	RAD1	UPTAG0533	-0.125623	-0.303339	0.0325824
1_UPTAG0217	1	YLR207W	HRD3	UPTAG0217	-0.125551	-0.0370184	-0.219875
3_UPTAG0694	3	YJL221C	IMA4	UPTAG0694	-0.125457	-0.11366	-0.137351
5_UPTAG0577	5	YNL097C-B	YNL097C-B	UPTAG0577	-0.125436	-0.216627	-0.0396684
1_UPTAG0681	1	YJR055W	HIT1	UPTAG0681	-0.125252	0.0767045	-0.360153
2_UPTAG0319	2	YOL091W	SPO21	UPTAG0319	-0.12512	-0.229708	-0.027604
4_UPTAG0337	4	YHR192W	LNP1	UPTAG0337	-0.125094	-0.0526537	-0.201365
5_UPTAG0079	5	YNR056C	BIO5	UPTAG0079	-0.124909	0.0197967	-0.285763
4_UPTAG0620	4	YOR252W	TMA16	UPTAG0620	-0.124894	-0.248307	-0.0112123
1_UPTAG0659	1	YGL196W	DSD1	UPTAG0659	-0.124785	-0.236235	-0.0213309
2_UPTAG0901	2	YOR185C	GSP2	UPTAG0901	-0.124596	-0.128071	-0.12113
1_UPTAG0397	1	YNR007C	ATG3	UPTAG0397	-0.124542	-0.0714646	-0.179647
2_UPTAG1076	2	YMR228W	MTF1	UPTAG1076	-0.124534	-0.278089	0.0142374
3_UPTAG0800	3	YLL060C	GTT2	UPTAG0800	-0.124521	-0.305226	0.0360486
5_UPTAG0507	5	YGL159W	YGL159W	UPTAG0507	-0.124453	-0.170601	-0.0797357
2_UPTAG0534	2	YML095C	RAD10	UPTAG0534	-0.124385	0.0061953	-0.267971
1_UPTAG0139	1	YBR014C	GRX7	UPTAG0139	-0.124259	-0.202704	-0.0498592
1_UPTAG0312	1	YDR142C	PEX7	UPTAG0312	-0.124013	-0.0446549	-0.207993
1_UPTAG0773	1	YKL190W	CNB1	UPTAG0773	-0.123884	-0.251629	-0.00653531
1_UPTAG0175	1	YDR036C	EHD3	UPTAG0175	-0.123842	-0.115443	-0.132289
3_UPTAG1104	3	YKL039W	PTM1	UPTAG1104	-0.123709	-0.183367	-0.0664209
5_UPTAG0526	5	YKL085W	MDH1	UPTAG0526	-0.123522	0.0318562	-0.297676
1_UPTAG0502	1	YNL015W	PBI2	UPTAG0502	-0.123406	-0.13919	-0.107794
4_UPTAG0336	4	YHR182W	YHR182W	UPTAG0336	-0.123068	-0.170887	-0.0767823
2_UPTAG0705	2	YGL221C	NIF3	UPTAG0705	-0.122797	-0.0345247	-0.216823
3_UPTAG0300	3	YHR175W	CTR2	UPTAG0300	-0.12249	-0.0801376	-0.166123
2_UPTAG0960	2	YBR165W	UBS1	UPTAG0960	-0.122429	-0.240446	-0.013341
5_UPTAG0371	5	YMR030W-A	YMR030W-A	UPTAG0371	-0.122404	-0.132753	-0.112129
3_UPTAG0437	3	YML072C	TCB3	UPTAG0437	-0.122398	-0.0516504	-0.196794
5_UPTAG0340	5	YKL068W-A	YKL068W-A	UPTAG0340	-0.122364	-0.187022	-0.060481
3_UPTAG0778	3	YLR081W	GAL2	UPTAG0778	-0.121983	-0.0791882	-0.166086
3_UPTAG0607	3	YJL116C	NCA3	UPTAG0607	-0.121808	-0.0354296	-0.213689
2_UPTAG0003	2	YJL218W	YJL218W	UPTAG0003	-0.121719	0.0124905	-0.269706
4_UPTAG0556	4	YOR081C	TGL5	UPTAG0556	-0.121698	-0.0343246	-0.214705
3_UPTAG0228	3	YER145C	FTR1	UPTAG0228	-0.12128	-0.145743	-0.0972245
1_UPTAG0670	1	YGL110C	CUE3	UPTAG0670	-0.121229	-0.0817954	-0.16177
5_UPTAG0605	5	YOR394W	PAU21	UPTAG0605	-0.121216	-0.051923	-0.194006
4_UPTAG0326	4	YGL036W	YGL036W	UPTAG0326	-0.121183	-0.16487	-0.0787805
5_UPTAG0362	5	YLR361C-A	YLR361C-A	UPTAG0362	-0.120922	-0.347194	0.074626
4_UPTAG0910	4	YDR462W	MRPL28	UPTAG0910	-0.120856	-0.357523	0.0824035
4_UPTAG0874	4	YML063W	RPS1B	UPTAG0874	-0.120813	-0.0444608	-0.201433
4_UPTAG0978	4	YGR222W	PET54	UPTAG0978	-0.120761	-0.043708	-0.202163
1_UPTAG0349	1	YMR161W	HLJ1	UPTAG0349	-0.120697	-0.162393	-0.080173
2_UPTAG0714	2	YLR327C	TMA10	UPTAG0714	-0.120604	-0.772672	0.326851
2_UPTAG0824	2	YPR189W	SKI3	UPTAG0824	-0.12003	-0.244632	-0.00533913
2_UPTAG0867	2	YML113W	DAT1	UPTAG0867	-0.119716	0.0238467	-0.279158
3_UPTAG0777	3	YBR018C	GAL7	UPTAG0777	-0.119335	-0.117961	-0.12071
3_UPTAG0726	3	YMR323W	ERR3	UPTAG0726	-0.119137	0.0704829	-0.337505
1_UPTAG0026	1	YNR076W	PAU6	UPTAG0026	-0.119016	0.0124767	-0.263706
4_UPTAG0748	4	YML066C	SMA2	UPTAG0748	-0.11898	-0.125243	-0.112744
1_UPTAG0316	1	YDR329C	PEX3	UPTAG0316	-0.118677	0.0337181	-0.289092
5_UPTAG0652	5	YDR194W-A	YDR194W-A	UPTAG0652	-0.118572	-0.0553411	-0.184702
4_UPTAG0525	4	YOR315W	SFG1	UPTAG0525	-0.118207	-0.0730696	-0.164803
5_UPTAG0083	5	YHR208W	BAT1	UPTAG0083	-0.117994	-0.047211	-0.192431
4_UPTAG0954	4	YIL133C	RPL16A	UPTAG0954	-0.117939	-0.0380477	-0.202515
1_UPTAG0628	1	YIL034C	CAP2	UPTAG0628	-0.117557	-0.279449	0.027987
1_UPTAG0167	1	YPL032C	SVL3	UPTAG0167	-0.117025	-0.208139	-0.0313256
1_UPTAG0516	1	YAR031W	PRM9	UPTAG0516	-0.116973	-0.0744451	-0.160792
3_UPTAG0283	3	YML081C-A	ATP18	UPTAG0283	-0.11668	-0.174165	-0.0613975
4_UPTAG0662	4	YOR292C	YOR292C	UPTAG0662	-0.116598	-0.123935	-0.109298
5_UPTAG0578	5	YNL130C-A	DGR1	UPTAG0578	-0.116568	-0.182454	-0.05356
4_UPTAG0733	4	YJL144W	YJL144W	UPTAG0733	-0.116339	-0.0744995	-0.159429
2_UPTAG0528	2	YNL021W	HDA1	UPTAG0528	-0.116289	0.00941478	-0.254001
5_UPTAG0046	5	YML056C	IMD4	UPTAG0046	-0.11609	-0.0777046	-0.155524
5_UPTAG0368	5	YML100W-A	YML100W-A	UPTAG0368	-0.115745	-0.16472	-0.0683789
4_UPTAG0020	4	YDR042C	YDR042C	UPTAG0020	-0.115653	-0.159661	-0.0729478
5_UPTAG0429	5	YAR035C-A	YAR035C-A	UPTAG0429	-0.115545	-0.122432	-0.108691
1_UPTAG0893	1	YML115C	VAN1	UPTAG0893	-0.114943	-0.00826544	-0.230142
3_UPTAG0404	3	YMR256C	COX7	UPTAG0404	-0.114909	-0.118764	-0.111064
2_UPTAG0695	2	YJL206C	YJL206C	UPTAG0695	-0.114746	-0.101672	-0.127939
1_UPTAG0049	1	YKR088C	TVP38	UPTAG0049	-0.114689	0.000724102	-0.240144
2_UPTAG0872	2	YNL167C	SKO1	UPTAG0872	-0.114653	-0.0310161	-0.203439
5_UPTAG0198	5	YDR408C	ADE8	UPTAG0198	-0.114476	-0.0272686	-0.207296
1_UPTAG1060	1	YGL121C	GPG1	UPTAG1060	-0.114413	-0.05469	-0.176716
3_UPTAG0047	3	YJL145W	SFH5	UPTAG0047	-0.114232	-0.00461633	-0.232866
1_UPTAG0849	1	YBR200W	BEM1	UPTAG0849	-0.114203	-0.117236	-0.111177
3_UPTAG0601	3	YNL066W	SUN4	UPTAG0601	-0.113913	-0.240893	0.00278833
4_UPTAG0198	4	YML107C	PML39	UPTAG0198	-0.113615	-0.207674	-0.0253142
2_UPTAG0047	2	YDR249C	YDR249C	UPTAG0047	-0.113578	-0.159069	-0.0694781
3_UPTAG0070	3	YER060W-A	FCY22	UPTAG0070	-0.113297	-0.179891	-0.0496412
5_UPTAG0022	5	YPL111W	CAR1	UPTAG0022	-0.112502	-0.127014	-0.0981333
3_UPTAG0464	3	YKR049C	FMP46	UPTAG0464	-0.11249	-0.153222	-0.0728774
4_UPTAG0706	4	YKL084W	HOT13	UPTAG0706	-0.112064	-0.140932	-0.0837631
2_UPTAG0570	2	YDR545W	YRF1-1	UPTAG0570	-0.111872	-0.119965	-0.103823
1_UPTAG0914	1	YJR117W	STE24	UPTAG0914	-0.111602	-0.19048	-0.0368141
3_UPTAG0302	3	YFL041W	FET5	UPTAG0302	-0.111428	0.00648336	-0.239841
2_UPTAG0398	2	YGL216W	KIP3	UPTAG0398	-0.111422	-0.0186614	-0.21056
3_UPTAG0734	3	YCL040W	GLK1	UPTAG0734	-0.111191	-0.27719	0.0376641
5_UPTAG0135	5	YDR158W	HOM2	UPTAG0135	-0.11117	-0.186353	-0.0397117
2_UPTAG0199	2	YDR386W	MUS81	UPTAG0199	-0.111037	-0.0371411	-0.188923
4_UPTAG0193	4	YML020W	YML020W	UPTAG0193	-0.11093	-0.133419	-0.0887867
5_UPTAG0651	5	YDR182W-A	YDR182W-A	UPTAG0651	-0.110807	-0.0765583	-0.145889
1_UPTAG0025	1	YFL020C	PAU5	UPTAG0025	-0.110627	-0.21217	-0.0157633
2_UPTAG0217	2	YPL167C	REV3	UPTAG0217	-0.11059	-0.207403	-0.0198679
4_UPTAG0465	4	YGL101W	YGL101W	UPTAG0465	-0.110013	-0.209873	-0.0166206
1_UPTAG0208	1	YHR142W	CHS7	UPTAG0208	-0.10996	0.0806934	-0.3297
3_UPTAG0789	3	YHR174W	ENO2	UPTAG0789	-0.109892	-0.0609224	-0.160582
1_UPTAG0522	1	YLR170C	APS1	UPTAG0522	-0.109683	-0.368223	0.10949
2_UPTAG0025	2	YDR505C	PSP1	UPTAG0025	-0.109631	-0.0548051	-0.166624
4_UPTAG0479	4	YJR008W	MHO1	UPTAG0479	-0.109478	-0.0549691	-0.166128
4_UPTAG0483	4	YKR018C	YKR018C	UPTAG0483	-0.109309	-0.0963074	-0.122428
2_UPTAG0729	2	YIL130W	ASG1	UPTAG0729	-0.109027	-0.0513253	-0.169133
5_UPTAG0514	5	YHL035C	VMR1	UPTAG0514	-0.109001	-0.132309	-0.0860633
4_UPTAG0363	4	YLR143W	DPH6	UPTAG0363	-0.108955	-0.0566421	-0.163237
3_UPTAG0792	3	YKL127W	PGM1	UPTAG0792	-0.108867	0.030401	-0.26303
5_UPTAG0397	5	YOL164W-A	YOL164W-A	UPTAG0397	-0.10883	-0.202313	-0.0210385
3_UPTAG0163	3	YFL011W	HXT10	UPTAG0163	-0.108766	-0.264021	0.0313927
1_UPTAG0772	1	YLR433C	CNA1	UPTAG0772	-0.108744	-0.0263537	-0.196126
5_UPTAG0695	5	YFL054C	YFL054C	UPTAG0695	-0.108684	-0.154237	-0.0645252
1_UPTAG0275	1	YMR077C	VPS20	UPTAG0275	-0.108662	-0.0959288	-0.121509
1_UPTAG0008	1	YNL293W	MSB3	UPTAG0008	-0.108517	0.0246147	-0.255195
3_UPTAG1142	3	YBR250W	SPO23	UPTAG1142	-0.108198	-0.0814958	-0.135404
4_UPTAG0047	4	YER085C	YER085C	UPTAG0047	-0.108061	-0.0207341	-0.201016
1_UPTAG0635	1	YIR003W	AIM21	UPTAG0635	-0.107934	-0.00170782	-0.222608
5_UPTAG0591	5	YOR011W-A	YOR011W-A	UPTAG0591	-0.107906	-0.11003	-0.105785
4_UPTAG0169	4	YLR065C	ENV10	UPTAG0169	-0.107756	-0.215328	-0.00765215
3_UPTAG0436	3	YOR086C	TCB1	UPTAG0436	-0.107738	-0.270819	0.0387665
3_UPTAG0502	3	YGR235C	MIC26	UPTAG0502	-0.107215	0.00164452	-0.224964
2_UPTAG0057	2	YKL151C	YKL151C	UPTAG0057	-0.106982	-0.167537	-0.0488665
5_UPTAG0347	5	YLR154C-G	YLR154C-G	UPTAG0347	-0.106791	-0.164083	-0.051688
1_UPTAG0199	1	YGR166W	TRS65	UPTAG0199	-0.106565	-0.100422	-0.112734
4_UPTAG0752	4	YLL005C	SPO75	UPTAG0752	-0.10647	-0.055653	-0.159143
4_UPTAG0157	4	YKR005C	YKR005C	UPTAG0157	-0.106411	-0.0868907	-0.1262
1_UPTAG0533	1	YAL048C	GEM1	UPTAG0533	-0.106409	0.00838524	-0.231133
2_UPTAG0148	2	YCR077C	PAT1	UPTAG0148	-0.106378	-0.00980965	-0.209877
1_UPTAG0500	1	YPL019C	VTC3	UPTAG0500	-0.106349	-0.313124	0.0744705
5_UPTAG0587	5	YOL097W-A	YOL097W-A	UPTAG0587	-0.106261	-0.349275	0.10166
2_UPTAG0974	2	YOL001W	PHO80	UPTAG0974	-0.106075	-0.126844	-0.0856007
3_UPTAG1134	3	YBR063C	YBR063C	UPTAG1134	-0.10605	-0.273364	0.04386
1_UPTAG0671	1	YOR042W	CUE5	UPTAG0671	-0.105194	-0.104071	-0.106318
4_UPTAG1000	4	YJL063C	MRPL8	UPTAG1000	-0.105172	-0.138425	-0.0726673
1_UPTAG0851	1	YMR273C	ZDS1	UPTAG0851	-0.104923	-0.17135	-0.0414203
2_UPTAG0352	2	YIL123W	SIM1	UPTAG0352	-0.104861	0.0853117	-0.323962
2_UPTAG0320	2	YHR124W	NDT80	UPTAG0320	-0.104818	-0.0294322	-0.184361
5_UPTAG0542	5	YNL071W	LAT1	UPTAG0542	-0.104795	-0.15993	-0.0516891
1_UPTAG0658	1	YGL015C	YGL015C	UPTAG0658	-0.103857	-0.262622	0.039156
1_UPTAG0977	1	YKL166C	TPK3	UPTAG0977	-0.103669	0.0273051	-0.247732
2_UPTAG0787	2	YDR191W	HST4	UPTAG0787	-0.1035	-0.0354009	-0.174974
4_UPTAG0688	4	YNL024C	EFM6	UPTAG0688	-0.103448	-0.0348258	-0.175498
1_UPTAG1055	1	YHL048W	COS8	UPTAG1055	-0.103413	-0.109218	-0.0976304
1_UPTAG0386	1	YOL082W	ATG19	UPTAG0386	-0.103341	-0.0622341	-0.145653
3_UPTAG1135	3	YBR074W	PFF1	UPTAG1135	-0.10326	-0.0523493	-0.156032
4_UPTAG0453	4	YEL025C	YEL025C	UPTAG0453	-0.102953	-0.157485	-0.0504082
4_UPTAG0284	4	YMR289W	ABZ2	UPTAG0284	-0.102767	-0.055052	-0.152114
5_UPTAG0393	5	YOL038C-A	YOL038C-A	UPTAG0393	-0.102745	-0.0622108	-0.144452
2_UPTAG1097	2	YNR010W	CSE2	UPTAG1097	-0.102507	-0.253365	0.0340585
3_UPTAG0139	3	YGR181W	TIM13	UPTAG0139	-0.102442	-0.166639	-0.0409802
3_UPTAG0078	3	YGL255W	ZRT1	UPTAG0078	-0.10227	-0.174243	-0.0337187
4_UPTAG0692	4	YNL123W	NMA111	UPTAG0692	-0.102241	-0.177869	-0.0303817
1_UPTAG0769	1	YBR067C	TIP1	UPTAG0769	-0.102146	-0.105531	-0.0987684
4_UPTAG0679	4	YDL248W	COS7	UPTAG0679	-0.102144	-0.116421	-0.0880075
4_UPTAG0782	4	YML005W	TRM12	UPTAG0782	-0.102031	-0.343088	0.104456
1_UPTAG0946	1	YBL082C	ALG3	UPTAG0946	-0.101952	-0.0845182	-0.1196
2_UPTAG0253	2	YGR109C	CLB6	UPTAG0253	-0.10182	-0.0866682	-0.117133
3_UPTAG0273	3	YDR536W	STL1	UPTAG0273	-0.10176	0.0601641	-0.284183
5_UPTAG0291	5	YCL066W	HMLALPHA1	UPTAG0291	-0.10157	-0.148092	-0.0565025
4_UPTAG0124	4	YIR042C	YIR042C	UPTAG0124	-0.101501	0.0120185	-0.224721
1_UPTAG0223	1	YFL025C	BST1	UPTAG0223	-0.101321	-0.210751	0.000390374
2_UPTAG1052	2	YHR121W	LSM12	UPTAG1052	-0.101207	0.0129701	-0.225203
1_UPTAG0117	1	YJR134C	SGM1	UPTAG0117	-0.100838	-0.178027	-0.0275698
3_UPTAG1109	3	YMR191W	SPG5	UPTAG1109	-0.100781	-0.208875	-0.000224825
2_UPTAG0141	2	YGR089W	NNF2	UPTAG0141	-0.100456	-0.0182734	-0.187605
3_UPTAG0144	3	YFL036W	RPO41	UPTAG0144	-0.100217	0.0148003	-0.225204
5_UPTAG0185	5	YOR184W	SER1	UPTAG0185	-0.100155	-0.127784	-0.0730457
4_UPTAG0604	4	YGR093W	DRN1	UPTAG0604	-0.100058	-0.113351	-0.0868859
2_UPTAG0553	2	YER180C	ISC10	UPTAG0553	-0.0999954	-0.0613177	-0.139739
2_UPTAG0893	2	YJR050W	ISY1	UPTAG0893	-0.0999459	0.0207515	-0.231671
4_UPTAG0577	4	YGR236C	SPG1	UPTAG0577	-0.0995413	-0.00224004	-0.203883
1_UPTAG0604	1	YLR313C	SPH1	UPTAG0604	-0.0995267	-0.229081	0.0193458
3_UPTAG1095	3	YCL036W	GFD2	UPTAG1095	-0.0994437	-0.118135	-0.0809912
3_UPTAG0084	3	YBR008C	FLR1	UPTAG0084	-0.0994105	-0.0776108	-0.121545
4_UPTAG0379	4	YMR196W	YMR196W	UPTAG0379	-0.0993136	-0.175729	-0.0267427
5_UPTAG0099	5	YHR216W	IMD2	UPTAG0099	-0.0990799	-0.0668395	-0.132057
5_UPTAG0319	5	YHR213W-B	YHR213W-B	UPTAG0319	-0.0988648	-0.116375	-0.0815645
2_UPTAG0862	2	YML103C	NUP188	UPTAG0862	-0.0988278	-0.0489166	-0.150528
3_UPTAG0141	3	YKL040C	NFU1	UPTAG0141	-0.0985584	-0.0140265	-0.188353
3_UPTAG0217	3	YOL156W	HXT11	UPTAG0217	-0.0982867	-0.144722	-0.0532995
2_UPTAG0827	2	YLR136C	TIS11	UPTAG0827	-0.0980203	-0.0860536	-0.110087
2_UPTAG0346	2	YMR133W	REC114	UPTAG0346	-0.0978014	-0.137397	-0.0592631
4_UPTAG1001	4	YEL050C	RML2	UPTAG1001	-0.0976999	-0.121056	-0.0747154
1_UPTAG0963	1	YPL140C	MKK2	UPTAG0963	-0.097697	0.00345719	-0.206482
4_UPTAG0015	4	YDL183C	YDL183C	UPTAG0015	-0.0974137	-0.0261467	-0.172385
2_UPTAG0340	2	YBR073W	RDH54	UPTAG0340	-0.0972871	-0.120562	-0.074382
3_UPTAG0205	3	YOL020W	TAT2	UPTAG0205	-0.0968331	0.054698	-0.266168
4_UPTAG0606	4	YKL091C	YKL091C	UPTAG0606	-0.0965739	-0.180841	-0.0169585
1_UPTAG0203	1	YCL001W	RER1	UPTAG0203	-0.0963985	-0.068777	-0.124559
3_UPTAG1136	3	YBR147W	RTC2	UPTAG1136	-0.0963705	-0.30888	0.0888174
4_UPTAG0532	4	YPL208W	RKM1	UPTAG0532	-0.0963169	-0.128182	-0.0651403
3_UPTAG0064	3	YOR079C	ATX2	UPTAG0064	-0.095861	-0.261406	0.0526283
4_UPTAG0025	4	YDR282C	MRX10	UPTAG0025	-0.0954993	-0.142887	-0.049619
2_UPTAG0317	2	YER179W	DMC1	UPTAG0317	-0.0954331	-0.202932	0.0046085
5_UPTAG0163	5	YDR019C	GCV1	UPTAG0163	-0.0953168	0.0277419	-0.229859
1_UPTAG0654	1	YLR099C	ICT1	UPTAG0654	-0.0952569	-0.0277097	-0.166123
1_UPTAG0957	1	YNL307C	MCK1	UPTAG0957	-0.0950325	-0.0928833	-0.0971848
5_UPTAG0463	5	YDR524W-C	YDR524W-C	UPTAG0463	-0.0949692	-0.0416138	-0.150374
3_UPTAG0245	3	YER056C	FCY2	UPTAG0245	-0.0949661	0.0522514	-0.258931
1_UPTAG1024	1	YMR175W	SIP18	UPTAG1024	-0.0946047	0.0134977	-0.211468
2_UPTAG0963	2	YGL241W	KAP114	UPTAG0963	-0.0945512	-0.0313789	-0.160617
3_UPTAG0234	3	YFL050C	ALR2	UPTAG0234	-0.0944667	0.164897	-0.410906
1_UPTAG0718	1	YGR221C	TOS2	UPTAG0718	-0.0943191	-0.100231	-0.0884316
2_UPTAG0730	2	YLR278C	YLR278C	UPTAG0730	-0.0942819	-0.120472	-0.0685591
1_UPTAG0906	1	YGR199W	PMT6	UPTAG0906	-0.0941573	-0.140881	-0.0488994
3_UPTAG0522	3	YLR168C	UPS2	UPTAG0522	-0.0939704	-0.0623752	-0.126273
2_UPTAG0321	2	YCL055W	KAR4	UPTAG0321	-0.093963	0.0494882	-0.253269
1_UPTAG0030	1	YFR018C	YFR018C	UPTAG0030	-0.0937684	-0.0267016	-0.164106
1_UPTAG0814	1	YBR040W	FIG1	UPTAG0814	-0.0932551	-0.0725245	-0.114288
3_UPTAG0558	3	YBR227C	MCX1	UPTAG0558	-0.0931991	0.0532368	-0.256195
5_UPTAG0350	5	YLR156C-A	YLR156C-A	UPTAG0350	-0.09257	-0.0993082	-0.0858632
4_UPTAG0997	4	YNL177C	MRPL22	UPTAG0997	-0.0922186	-0.0388125	-0.147678
1_UPTAG0183	1	YNL049C	SFB2	UPTAG0183	-0.0921257	-0.290203	0.08201
5_UPTAG0433	5	YBL100W-C	YBL100W-C	UPTAG0433	-0.0920447	-0.0331864	-0.153407
1_UPTAG0744	1	YLR390W	ECM19	UPTAG0744	-0.0920338	-0.107449	-0.0767811
4_UPTAG0638	4	YPL162C	YPL162C	UPTAG0638	-0.0916471	-0.050903	-0.133575
5_UPTAG0097	5	YFL018C	LPD1	UPTAG0097	-0.0916374	0.0101323	-0.201135
3_UPTAG0004	3	YJR150C	DAN1	UPTAG0004	-0.0915727	-0.0124384	-0.175301
4_UPTAG1058	4	YDR083W	RRP8	UPTAG1058	-0.0914797	-0.445715	0.192698
1_UPTAG0859	1	YAL063C	FLO9	UPTAG0859	-0.091211	-0.121011	-0.0620141
2_UPTAG0379	2	YML034W	SRC1	UPTAG0379	-0.0911314	-0.140589	-0.0433135
4_UPTAG0527	4	YOR352W	TFB6	UPTAG0527	-0.0903868	-0.0560049	-0.125608
3_UPTAG0493	3	YGL085W	LCL3	UPTAG0493	-0.0902354	-0.100148	-0.0803909
1_UPTAG0666	1	YOL003C	PFA4	UPTAG0666	-0.0899755	-0.119177	-0.0613531
1_UPTAG1029	1	YBR244W	GPX2	UPTAG1029	-0.0899751	0.0547573	-0.250863
1_UPTAG0356	1	YLR120C	YPS1	UPTAG0356	-0.0899704	0.00279186	-0.189109
4_UPTAG0435	4	YCR090C	YCR090C	UPTAG0435	-0.0897279	-0.0597828	-0.120308
3_UPTAG0290	3	YPL078C	ATP4	UPTAG0290	-0.0896376	-0.127631	-0.0526187
4_UPTAG0756	4	YPL283C	YRF1-7	UPTAG0756	-0.0895169	-0.0639113	-0.115585
2_UPTAG0357	2	YMR138W	CIN4	UPTAG0357	-0.0893447	0.0802141	-0.281519
1_UPTAG0845	1	YML109W	ZDS2	UPTAG0845	-0.0893264	0.0942913	-0.29977
1_UPTAG0081	1	YKL065C	YET1	UPTAG0081	-0.0893121	-0.169989	-0.0129091
1_UPTAG1111	1	YGL181W	GTS1	UPTAG1111	-0.088738	-0.446956	0.197992
3_UPTAG0107	3	YKL221W	MCH2	UPTAG0107	-0.0886288	-0.241721	0.049765
5_UPTAG0496	5	YDR148C	KGD2	UPTAG0496	-0.0885382	-0.140275	-0.0385927
4_UPTAG0828	4	YPL220W	RPL1A	UPTAG0828	-0.088337	-0.10961	-0.0673728
5_UPTAG0336	5	YJR005C-A	LSO1	UPTAG0336	-0.0881785	-0.0779688	-0.098461
4_UPTAG0311	4	YDL099W	BUG1	UPTAG0311	-0.0881217	-0.260244	0.0656368
3_UPTAG0077	3	YLR411W	CTR3	UPTAG0077	-0.0879192	-0.0890564	-0.0867829
1_UPTAG0820	1	YGR279C	SCW4	UPTAG0820	-0.087917	-0.0589858	-0.11744
4_UPTAG0081	4	YGR026W	YGR026W	UPTAG0081	-0.0878601	-0.142753	-0.0349798
2_UPTAG0980	2	YPL101W	ELP4	UPTAG0980	-0.0876823	-0.244718	0.0539261
1_UPTAG0347	1	YOR288C	MPD1	UPTAG0347	-0.0873674	-0.0930207	-0.0817361
1_UPTAG0094	1	YNL146W	YNL146W	UPTAG0094	-0.0870639	-0.0900863	-0.0840478
4_UPTAG0261	4	YOR365C	YOR365C	UPTAG0261	-0.0870466	-0.163927	-0.0140563
4_UPTAG0591	4	YPL186C	UIP4	UPTAG0591	-0.0870288	-0.148258	-0.0282928
1_UPTAG0848	1	YER114C	BOI2	UPTAG0848	-0.0867479	-0.191398	0.0108216
4_UPTAG1120	4	YPL097W	MSY1	UPTAG1120	-0.0867397	-0.0843836	-0.0890997
2_UPTAG0844	2	YHR015W	MIP6	UPTAG0844	-0.0863565	0.0301572	-0.213113
3_UPTAG0609	3	YBR179C	FZO1	UPTAG0609	-0.0860806	-0.114667	-0.0580497
3_UPTAG0634	3	YMR089C	YTA12	UPTAG0634	-0.0859391		-0.0859391
5_UPTAG0308	5	YHL015W-A	YHL015W-A	UPTAG0308	-0.0853696	0.0288112	-0.20937
1_UPTAG0193	1	YOR216C	RUD3	UPTAG0193	-0.0853644	0.00300574	-0.179503
5_UPTAG0484	5	YAR020C	PAU7	UPTAG0484	-0.0849899	-0.0597862	-0.110642
3_UPTAG0428	3	YPR204W	YPR204W	UPTAG0428	-0.0849011	0.10749	-0.306955
5_UPTAG0512	5	YGR131W	FHN1	UPTAG0512	-0.084651	0.0295431	-0.208667
1_UPTAG0998	1	YMR016C	SOK2	UPTAG0998	-0.0846169	-0.0176941	-0.154796
4_UPTAG0390	4	YOL159C-A	YOL159C-A	UPTAG0390	-0.0846107	-0.0204783	-0.151727
1_UPTAG0319	1	YML121W	GTR1	UPTAG0319	-0.0842257	-0.0491231	-0.120204
4_UPTAG0594	4	YBR141C	BMT2	UPTAG0594	-0.0841023	-0.0871091	-0.0811018
1_UPTAG0228	1	YLR096W	KIN2	UPTAG0228	-0.0840491	0.0102063	-0.184896
4_UPTAG0566	4	YNR066C	YNR066C	UPTAG0566	-0.0836361	-0.0538508	-0.114049
4_UPTAG0590	4	YAR027W	UIP3	UPTAG0590	-0.083574	-0.0476862	-0.120377
2_UPTAG0876	2	YKL005C	BYE1	UPTAG0876	-0.0834829	-0.0427165	-0.125435
2_UPTAG0182	2	YDR030C	RAD28	UPTAG0182	-0.0834674	-0.0258503	-0.143481
1_UPTAG0019	1	YLR361C	DCR2	UPTAG0019	-0.083466	-0.00705556	-0.164151
4_UPTAG0350	4	YKL047W	ANR2	UPTAG0350	-0.0833126	0.0375499	-0.215234
1_UPTAG0112	1	YNL086W	SNN1	UPTAG0112	-0.0832245	-0.01268	-0.157397
3_UPTAG0259	3	YBL042C	FUI1	UPTAG0259	-0.0831295	-0.0488624	-0.11823
4_UPTAG0899	4	YDR405W	MRP20	UPTAG0899	-0.083111	-0.0688772	-0.0974866
5_UPTAG0690	5	YDR430C	CYM1	UPTAG0690	-0.0830209	-0.0493055	-0.117543
2_UPTAG0127	2	YBR278W	DPB3	UPTAG0127	-0.0829692	-0.152592	-0.0165526
2_UPTAG0034	2	YGL228W	SHE10	UPTAG0034	-0.0829029	-0.127127	-0.0399941
1_UPTAG0868	1	YLR094C	GIS3	UPTAG0868	-0.0827055	0.00164249	-0.172293
1_UPTAG1088	1	YBR045C	GIP1	UPTAG1088	-0.0824978	0.0140923	-0.186022
5_UPTAG0638	5	YBR298C-A	YBR298C-A	UPTAG0638	-0.0823713	-0.0955735	-0.0692889
5_UPTAG0332	5	YJL077W-B	YJL077W-B	UPTAG0332	-0.0819805	-0.104792	-0.0595245
2_UPTAG0046	2	YDL114W	YDL114W	UPTAG0046	-0.0818776	0.0568334	-0.235358
2_UPTAG0441	2	YDR481C	PHO8	UPTAG0441	-0.0818346	0.0116244	-0.18177
5_UPTAG0200	5	YKL216W	URA1	UPTAG0200	-0.0812075	-0.00808056	-0.15824
4_UPTAG1062	4	YMR302C	YME2	UPTAG1062	-0.0811461	-0.0495428	-0.113457
1_UPTAG0856	1	YAR050W	FLO1	UPTAG0856	-0.0808711	-0.0749613	-0.0868051
3_UPTAG0445	3	YBR269C	SDH8	UPTAG0445	-0.0808601	-0.00974468	-0.155664
1_UPTAG1001	1	YMR238W	DFG5	UPTAG1001	-0.0806925	-0.184025	0.0157309
5_UPTAG0520	5	YJL077C	ICS3	UPTAG0520	-0.0805253	-0.109055	-0.0525488
1_UPTAG0254	1	YDR137W	RGP1	UPTAG0254	-0.0804945	-0.24577	0.0677784
3_UPTAG0432	3	YLL051C	FRE6	UPTAG0432	-0.0804653	0.077056	-0.257318
1_UPTAG0738	1	YGL027C	CWH41	UPTAG0738	-0.0799623	-0.186827	0.0195299
2_UPTAG0723	2	YNL215W	IES2	UPTAG0723	-0.0797373	-0.0673412	-0.0922407
2_UPTAG0446	2	YMR104C	YPK2	UPTAG0446	-0.0796194	0.0128239	-0.178394
3_UPTAG0818	3	YER065C	ICL1	UPTAG0818	-0.0795342	-0.297435	0.109733
4_UPTAG1037	4	YGL195W	GCN1	UPTAG1037	-0.079418	-0.164632	0.00104224
1_UPTAG0355	1	YER100W	UBC6	UPTAG0355	-0.0792515	-0.310502	0.120002
2_UPTAG0042	2	YBR108W	AIM3	UPTAG0042	-0.0791714	-0.126239	-0.033591
3_UPTAG0010	3	YMR279C	YMR279C	UPTAG0010	-0.0789638	0.0403374	-0.209027
4_UPTAG0980	4	YPL081W	RPS9A	UPTAG0980	-0.0783202	0.010158	-0.172581
2_UPTAG0168	2	YDL200C	MGT1	UPTAG0168	-0.0782572	-0.097563	-0.0592063
3_UPTAG0543	3	YOR305W	RRG7	UPTAG0543	-0.0781837	-0.240429	0.067646
2_UPTAG0822	2	YBR212W	NGR1	UPTAG0822	-0.0778097	0.00349247	-0.163969
5_UPTAG0216	5	YIL074C	SER33	UPTAG0216	-0.0774531	-0.107244	-0.0482652
1_UPTAG0756	1	YGR023W	MTL1	UPTAG0756	-0.0774391	0.0597227	-0.229025
2_UPTAG0518	2	YOR230W	WTM1	UPTAG0518	-0.0774361	-0.148844	-0.00939687
2_UPTAG0909	2	YGR233C	PHO81	UPTAG0909	-0.0773471	0.345226	-0.677499
2_UPTAG0106	2	YJL042W	MHP1	UPTAG0106	-0.0772285	-0.091573	-0.0630252
4_UPTAG1020	4	YHR052W	CIC1	UPTAG1020	-0.0771841	-0.217611	0.0507785
4_UPTAG1027	4	YLR421C	RPN13	UPTAG1027	-0.0766312	-0.0651451	-0.0882094
3_UPTAG0488	3	YDR065W	RRG1	UPTAG0488	-0.0766246	0.261361	-0.518829
2_UPTAG0745	2	YBR065C	ECM2	UPTAG0745	-0.0764003	-0.153102	-0.00357104
5_UPTAG0643	5	YCR024C-B	YCR024C-B	UPTAG0643	-0.0763478	0.0397113	-0.202567
4_UPTAG0057	4	YFL051C	YFL051C	UPTAG0057	-0.075935	0.0172324	-0.175537
4_UPTAG0619	4	YOR052C	TMC1	UPTAG0619	-0.0758715	-0.0668196	-0.0849805
2_UPTAG0195	2	YJL092W	SRS2	UPTAG0195	-0.0757088	-0.122941	-0.0299739
4_UPTAG0494	4	YMR002W	MIX17	UPTAG0494	-0.0756351	0.0301435	-0.189787
1_UPTAG0441	1	YJR032W	CPR7	UPTAG0441	-0.0755485	0.152915	-0.347126
4_UPTAG0810	4	YDR197W	CBS2	UPTAG0810	-0.0754214	-0.00570841	-0.148675
3_UPTAG0614	3	YOR147W	MDM32	UPTAG0614	-0.0753629	-0.0209678	-0.13189
2_UPTAG0761	2	YDR334W	SWR1	UPTAG0761	-0.0751995	-0.0414865	-0.109719
3_UPTAG0683	3	YCR107W	AAD3	UPTAG0683	-0.0750776	-0.137152	-0.0155637
1_UPTAG0812	1	YNL325C	FIG4	UPTAG0812	-0.0750163	-0.0346299	-0.116566
4_UPTAG0990	4	YDR447C	RPS17B	UPTAG0990	-0.0749757	-0.0490752	-0.10135
3_UPTAG1065	3	YHL050C	YHL050C	UPTAG1065	-0.0746456	-0.305376	0.124222
1_UPTAG0701	1	YGR080W	TWF1	UPTAG0701	-0.0745668	-0.20373	0.043977
1_UPTAG0294	1	YML038C	YMD8	UPTAG0294	-0.0744107	-0.139478	-0.0121515
4_UPTAG0596	4	YGR283C	YGR283C	UPTAG0596	-0.0743417	-0.16774	0.013376
4_UPTAG0171	4	YLR104W	LCL2	UPTAG0171	-0.0740411	-0.146969	-0.00462264
3_UPTAG0461	3	YNL168C	FMP41	UPTAG0461	-0.0740183	-0.0795837	-0.0684744
3_UPTAG1143	3	YBR259W	YBR259W	UPTAG1143	-0.0735901	-0.277498	0.105034
1_UPTAG1090	1	YDR260C	SWM1	UPTAG1090	-0.0735566	-0.188916	0.0332577
1_UPTAG0002	1	YKL051W	SFK1	UPTAG0002	-0.0734446	-0.0838344	-0.063129
1_UPTAG0124	1	YDR107C	TMN2	UPTAG0124	-0.0731833	-0.219627	0.0597556
1_UPTAG0491	1	YOR270C	VPH1	UPTAG0491	-0.0731266	-0.0912406	-0.0552371
2_UPTAG0813	2	YLR055C	SPT8	UPTAG0813	-0.0725277	0.0849795	-0.249362
1_UPTAG0858	1	YHR211W	FLO5	UPTAG0858	-0.072519	-0.387387	0.185789
2_UPTAG0083	2	YLR183C	TOS4	UPTAG0083	-0.0724461	-0.0774742	-0.0674356
4_UPTAG0528	4	YPL014W	YPL014W	UPTAG0528	-0.072218	-0.0657325	-0.0787328
1_UPTAG0101	1	YPR091C	NVJ2	UPTAG0101	-0.0720286	-0.0838298	-0.0603232
4_UPTAG1102	4	YNL292W	PUS4	UPTAG1102	-0.0713489	-0.0355918	-0.108015
1_UPTAG0257	1	YDR093W	DNF2	UPTAG0257	-0.0710587	-0.0080581	-0.136937
4_UPTAG0505	4	YMR258C	ROY1	UPTAG0505	-0.0707549	-0.100492	-0.0416179
4_UPTAG0031	4	YDR338C	YDR338C	UPTAG0031	-0.0707466	-0.238938	0.0798683
5_UPTAG0157	5	YIL168W	YIL168W	UPTAG0157	-0.070497	0.0434975	-0.194278
1_UPTAG0465	1	YMR017W	SPO20	UPTAG0465	-0.0703172	-0.140417	-0.00346629
1_UPTAG0297	1	YIR004W	DJP1	UPTAG0297	-0.070273	-0.0715904	-0.0689569
1_UPTAG0350	1	YJL073W	JEM1	UPTAG0350	-0.0701601	0.0800491	-0.237846
1_UPTAG0004	1	YLR206W	ENT2	UPTAG0004	-0.0700934	-0.144696	0.000840308
3_UPTAG0662	3	YML052W	SUR7	UPTAG0662	-0.0699667	0.16327	-0.348321
1_UPTAG0236	1	YBL102W	SFT2	UPTAG0236	-0.0698686	-0.163583	0.018128
1_UPTAG0285	1	YMR010W	YMR010W	UPTAG0285	-0.0696589	-0.133983	-0.00808111
5_UPTAG0733	5	YNL037C	IDH1	UPTAG0733	-0.0695651	-0.155536	0.0115697
1_UPTAG1072	1	YDR085C	AFR1	UPTAG1072	-0.0693169	-0.0647505	-0.0738977
1_UPTAG0475	1	YER143W	DDI1	UPTAG0475	-0.0687239	-0.166584	0.0229174
5_UPTAG0420	5	YPL282C	PAU22	UPTAG0420	-0.0681585	-0.0856339	-0.0508922
2_UPTAG1082	2	YOR295W	UAF30	UPTAG1082	-0.0678652	-0.154307	0.0136891
3_UPTAG0887	3	YMR095C	SNO1	UPTAG0887	-0.0673136	-0.105995	-0.0296421
4_UPTAG0574	4	YPL103C	FMP30	UPTAG0574	-0.0672626	0.0385666	-0.181474
1_UPTAG0436	1	YGR132C	PHB1	UPTAG0436	-0.0671498	-0.0316713	-0.103523
2_UPTAG0290	2	YNL012W	SPO1	UPTAG0290	-0.0670397	-0.0719871	-0.0621093
1_UPTAG0641	1	YPL158C	AIM44	UPTAG0641	-0.067029	-0.220509	0.0716817
1_UPTAG0330	1	YHR079C	IRE1	UPTAG0330	-0.0670077	0.0461654	-0.18982
3_UPTAG0773	3	YJR159W	SOR1	UPTAG0773	-0.0666201	-0.322236	0.15045
4_UPTAG0921	4	YPL173W	MRPL40	UPTAG0921	-0.0664859	0.0251645	-0.164356
2_UPTAG0467	2	YIL095W	PRK1	UPTAG0467	-0.0664361	-0.160643	0.0219941
1_UPTAG0054	1	YCR082W	AHC2	UPTAG0054	-0.0663242	0.0332304	-0.173261
2_UPTAG0085	2	YNR048W	YNR048W	UPTAG0085	-0.0662173	-0.0662229	-0.0662118
4_UPTAG0340	4	YIL108W	YIL108W	UPTAG0340	-0.0659801	-0.0290406	-0.10389
5_UPTAG0688	5	YDR148C	KGD2	UPTAG0688	-0.0659332	-0.0885844	-0.043632
1_UPTAG0263	1	YNL051W	COG5	UPTAG0263	-0.0658344	-0.149496	0.0132407
4_UPTAG0368	4	YLR257W	YLR257W	UPTAG0368	-0.0657294	-0.0299163	-0.102454
2_UPTAG1101	2	YER045C	ACA1	UPTAG1101	-0.0656529	0.0316407	-0.169985
2_UPTAG0907	2	YAL051W	OAF1	UPTAG0907	-0.0654781	-0.0980712	-0.0336051
4_UPTAG0573	4	YLR454W	FMP27	UPTAG0573	-0.0654217	-0.186598	0.0463605
1_UPTAG1041	1	YOR010C	TIR2	UPTAG1041	-0.0653782	-0.104401	-0.0273833
2_UPTAG0118	2	YOL017W	ESC8	UPTAG0118	-0.0653421	-0.000901538	-0.132796
2_UPTAG0013	2	YLR419W	YLR419W	UPTAG0013	-0.0652014	0.0091211	-0.143562
3_UPTAG0648	3	YKR066C	CCP1	UPTAG0648	-0.0651317	-0.11021	-0.0214197
2_UPTAG0457	2	YFL033C	RIM15	UPTAG0457	-0.0650116	-0.131444	-0.00150379
4_UPTAG0746	4	YGR212W	SLI1	UPTAG0746	-0.0649994	-0.149463	0.0147915
5_UPTAG0375	5	YMR194C-B	CMC4	UPTAG0375	-0.0649396	-0.122759	-0.00934848
5_UPTAG0685	5	YCL063W	VAC17	UPTAG0685	-0.0647406	0.232744	-0.439938
5_UPTAG0329	5	YIR021W-A	YIR021W-A	UPTAG0329	-0.0644876	-0.0352345	-0.0943461
3_UPTAG1148	3	YCL002C	YCL002C	UPTAG1148	-0.0643032	-0.229828	0.0841699
2_UPTAG0349	2	YLR329W	REC102	UPTAG0349	-0.0640565	-0.0226043	-0.106735
1_UPTAG0746	1	YHL043W	ECM34	UPTAG0746	-0.0639062	-0.176711	0.0407142
3_UPTAG1063	3	YBL113C	YBL113C	UPTAG1063	-0.0635975	-0.217615	0.0755521
4_UPTAG0915	4	YDR322W	MRPL35	UPTAG0915	-0.0634992	-0.0518263	-0.0752672
3_UPTAG0296	3	YMR088C	VBA1	UPTAG0296	-0.0634565	-0.019483	-0.108812
2_UPTAG0461	2	YGL019W	CKB1	UPTAG0461	-0.0632587	-0.0534162	-0.0731688
2_UPTAG0114	2	YFR013W	IOC3	UPTAG0114	-0.0631202	-0.131991	0.00261246
5_UPTAG0379	5	YMR272W-B	YMR272W-B	UPTAG0379	-0.06304	-0.0810206	-0.0452808
4_UPTAG0100	4	YHR029C	YHI9	UPTAG0100	-0.0629228	0.123312	-0.276812
2_UPTAG0005	2	YPL074W	YTA6	UPTAG0005	-0.0628789	-0.0766146	-0.0492728
4_UPTAG0819	4	YKL156W	RPS27A	UPTAG0819	-0.0627316	-0.194207	0.0577561
2_UPTAG1055	2	YLR059C	REX2	UPTAG1055	-0.0627237	-0.113376	-0.0137898
3_UPTAG0138	3	YJR135W-A	TIM8	UPTAG0138	-0.0624659	-0.152403	0.0221917
4_UPTAG0324	4	YER071C	TDA2	UPTAG0324	-0.0623996	-0.228868	0.0868321
1_UPTAG0594	1	YOL112W	MSB4	UPTAG0594	-0.0623736	-0.0596697	-0.0650825
4_UPTAG0269	4	YPL201C	YIG1	UPTAG0269	-0.0621949	-0.0267933	-0.0984871
3_UPTAG0617	3	YDR393W	SHE9	UPTAG0617	-0.0621931	-0.301911	0.143311
2_UPTAG0738	2	YER041W	YEN1	UPTAG0738	-0.0621491	-0.337127	0.168715
3_UPTAG1114	3	YAL037W	YAL037W	UPTAG1114	-0.0618884	0.062605	-0.198148
2_UPTAG0502	2	YDL056W	MBP1	UPTAG0502	-0.0618179	-0.0300594	-0.0942912
3_UPTAG0520	3	YLR001C	YLR001C	UPTAG0520	-0.0616223	0.0281501	-0.157354
4_UPTAG0817	4	YFR032C-A	RPL29	UPTAG0817	-0.0614405	0.113108	-0.260052
1_UPTAG0784	1	YHR030C	SLT2	UPTAG0784	-0.0613839	-0.092205	-0.0312076
4_UPTAG1012	4	YJL191W	RPS14B	UPTAG1012	-0.0612346	0.0367097	-0.166316
2_UPTAG0397	2	YCL029C	BIK1	UPTAG0397	-0.0611208	0.0760304	-0.212693
1_UPTAG0597	1	YIL138C	TPM2	UPTAG0597	-0.0609865	0.0558503	-0.188126
1_UPTAG0229	1	YPR032W	SRO7	UPTAG0229	-0.0609464	-0.222066	0.0839737
4_UPTAG0386	4	YNR034W-A	EGO4	UPTAG0386	-0.0608246	0.00521961	-0.130038
4_UPTAG0676	4	YMR291W	TDA1	UPTAG0676	-0.0607549	-0.0746017	-0.0470396
1_UPTAG0847	1	YBL085W	BOI1	UPTAG0847	-0.0606722	-0.0100043	-0.113184
1_UPTAG0696	1	YKL161C	KDX1	UPTAG0696	-0.0605616	-0.00205497	-0.121542
2_UPTAG1049	2	YNL230C	ELA1	UPTAG1049	-0.0605284	-0.10638	-0.0160893
3_UPTAG0657	3	YCR021C	HSP30	UPTAG0657	-0.0601405	-0.0386668	-0.0819388
3_UPTAG0209	3	YDL247W	MPH2	UPTAG0209	-0.0601039	-0.0829133	-0.0376495
4_UPTAG0905	4	YNL252C	MRPL17	UPTAG0905	-0.0595394	-0.175079	0.0474291
3_UPTAG1093	3	YAL034C	FUN19	UPTAG1093	-0.0593922	-0.247916	0.107319
1_UPTAG1030	1	YPL196W	OXR1	UPTAG1030	-0.0593389	-0.0769002	-0.0419889
1_UPTAG0674	1	YEL020C	YEL020C	UPTAG0674	-0.0593239	-0.142268	0.0191094
2_UPTAG0823	2	YOR076C	SKI7	UPTAG0823	-0.0591637	0.0100927	-0.131913
3_UPTAG0142	3	YOR226C	ISU2	UPTAG0142	-0.0590764	-0.147239	0.0240075
3_UPTAG0907	3	YMR169C	ALD3	UPTAG0907	-0.0589508	-0.15711	0.0329534
1_UPTAG0065	1	YJR118C	ILM1	UPTAG0065	-0.0587385	-0.0231298	-0.0952484
3_UPTAG1071	3	YML133C	YML133C	UPTAG1071	-0.0587254	-0.0120213	-0.106992
5_UPTAG0172	5	YLR146C	SPE4	UPTAG0172	-0.0585626	-0.127076	0.00684398
2_UPTAG0303	2	YPL194W	DDC1	UPTAG0303	-0.0582505	-0.157719	0.0348005
1_UPTAG0328	1	YDR490C	PKH1	UPTAG0328	-0.0581785	0.00979963	-0.129519
3_UPTAG0541	3	YOR271C	FSF1	UPTAG0541	-0.0580263	-0.200025	0.0712399
4_UPTAG0051	4	YER158C	YER158C	UPTAG0051	-0.0579783	-0.00255888	-0.115612
4_UPTAG0821	4	YNL081C	SWS2	UPTAG0821	-0.0577565	-0.324994	0.16763
1_UPTAG0710	1	YGL174W	BUD13	UPTAG0710	-0.0576931	-0.103104	-0.0136684
2_UPTAG0136	2	YPL138C	SPP1	UPTAG0136	-0.0574579	-0.0973818	-0.0186092
2_UPTAG0820	2	YBR066C	NRG2	UPTAG0820	-0.0573315	0.0778488	-0.2065
1_UPTAG0578	1	YGR268C	HUA1	UPTAG0578	-0.0571751	-0.0451824	-0.0692683
5_UPTAG0205	5	YLR420W	URA4	UPTAG0205	-0.0569432	-0.110073	-0.00570091
4_UPTAG0079	4	YGL261C	PAU11	UPTAG0079	-0.0569329	-0.0575764	-0.0562896
1_UPTAG0863	1	YOR107W	RGS2	UPTAG0863	-0.056839	-0.048234	-0.0654957
5_UPTAG0676	5	YAR020C	PAU7	UPTAG0676	-0.0567219	-0.0320622	-0.0818105
2_UPTAG0801	2	YER035W	EDC2	UPTAG0801	-0.0565767	-0.0751684	-0.0382215
5_UPTAG0019	5	YER069W	ARG5,6	UPTAG0019	-0.0565339	-0.102966	-0.0115501
5_UPTAG0732	5	YMR158C-A	YMR158C-A	UPTAG0732	-0.0563956	-0.0173646	-0.0965121
1_UPTAG0484	1	YEL051W	VMA8	UPTAG0484	-0.0559846	0.00703806	-0.121887
3_UPTAG0265	3	YBR041W	FAT1	UPTAG0265	-0.055879	0.0287469	-0.14578
3_UPTAG0895	3	YNL076W	MKS1	UPTAG0895	-0.055671	-0.0165739	-0.0958573
4_UPTAG0280	4	YPR157W	TDA6	UPTAG0280	-0.055652	0.119727	-0.25534
1_UPTAG0171	1	YDR388W	RVS167	UPTAG0171	-0.0552187	0.0122621	-0.126011
1_UPTAG0518	1	YKL135C	APL2	UPTAG0518	-0.0550483	-0.0695014	-0.0407385
1_UPTAG0734	1	YJR075W	HOC1	UPTAG0734	-0.0549476	0.0315547	-0.146969
2_UPTAG0516	2	YBR186W	PCH2	UPTAG0516	-0.0544591	-0.116288	0.00482831
2_UPTAG0194	2	YJR144W	MGM101	UPTAG0194	-0.0544228	-0.17971	0.0608481
3_UPTAG0872	3	YDL079C	MRK1	UPTAG0872	-0.0544088	-0.0110034	-0.0991607
1_UPTAG0107	1	YGR206W	MVB12	UPTAG0107	-0.0541843	-0.227904	0.100847
1_UPTAG0580	1	YLR144C	ACF2	UPTAG0580	-0.0541231	-0.133737	0.0213259
1_UPTAG1051	1	YPL223C	GRE1	UPTAG1051	-0.0538996	-0.0499451	-0.0578649
4_UPTAG0738	4	YKL086W	SRX1	UPTAG0738	-0.053539	-0.0912269	-0.0168107
1_UPTAG0969	1	YNL298W	CLA4	UPTAG0969	-0.0533855	0.0130413	-0.123019
5_UPTAG0631	5	YBR182C-A	YBR182C-A	UPTAG0631	-0.0530555	-0.0722237	-0.0341386
4_UPTAG0568	4	YPL277C	YPL277C	UPTAG0568	-0.0530261	0.0530512	-0.167526
5_UPTAG0636	5	YBR255C-A	YBR255C-A	UPTAG0636	-0.0529405	-0.00929147	-0.0979515
1_UPTAG0365	1	YIL005W	EPS1	UPTAG0365	-0.0527749	-0.0786583	-0.0273477
1_UPTAG0854	1	YDR309C	GIC2	UPTAG0854	-0.0526297	-0.0760812	-0.0295533
1_UPTAG0325	1	YNR032W	PPG1	UPTAG0325	-0.0526201	-0.100614	-0.00617146
1_UPTAG0435	1	YCL057W	PRD1	UPTAG0435	-0.0521476	-0.0321717	-0.072404
3_UPTAG0575	3	YEL039C	CYC7	UPTAG0575	-0.0519976	0.0100265	-0.116808
2_UPTAG0341	2	YOR368W	RAD17	UPTAG0341	-0.0519521	-0.525204	0.30381
4_UPTAG0218	4	YMR265C	YMR265C	UPTAG0218	-0.0519437	-0.133464	0.0252154
4_UPTAG1076	4	YDR385W	EFT2	UPTAG1076	-0.0517799	-0.0906194	-0.0139586
4_UPTAG1109	4	YGL243W	TAD1	UPTAG1109	-0.0516479	0.0568037	-0.16892
3_UPTAG0885	3	YHR047C	AAP1	UPTAG0885	-0.0514749	-0.16269	0.0517767
4_UPTAG0484	4	YKR023W	YKR023W	UPTAG0484	-0.0513383	-0.0598315	-0.0428949
4_UPTAG0418	4	YKL128C	PMU1	UPTAG0418	-0.0511774	-0.0482108	-0.0541501
3_UPTAG0923	3	YDL052C	SLC1	UPTAG0923	-0.0511192	-0.13609	0.0291245
4_UPTAG0502	4	YMR178W	YMR178W	UPTAG0502	-0.0510677	-0.125499	0.0197112
2_UPTAG1074	2	YLR013W	GAT3	UPTAG1074	-0.0508704	-0.106264	0.00247508
2_UPTAG1062	2	YMR285C	NGL2	UPTAG1062	-0.0506872	-0.0282444	-0.0734847
3_UPTAG0796	3	YLR174W	IDP2	UPTAG0796	-0.0505528	0.0852741	-0.200509
4_UPTAG0002	4	YCR026C	NPP1	UPTAG0002	-0.050392	-0.0470383	-0.0537535
4_UPTAG0010	4	YDL089W	NUR1	UPTAG0010	-0.050388	-0.0939929	-0.0080624
4_UPTAG0730	4	YPL070W	MUK1	UPTAG0730	-0.0503641	-0.0148815	-0.0867415
3_UPTAG0098	3	YKR103W	NFT1	UPTAG0098	-0.050296	-0.342611	0.192654
4_UPTAG0447	4	YDR132C	YDR132C	UPTAG0447	-0.0501997	-0.0958655	-0.00593519
4_UPTAG1111	4	YGR169C	PUS6	UPTAG1111	-0.0501872	-0.157199	0.0494318
2_UPTAG1033	2	YML076C	WAR1	UPTAG1033	-0.0500991	-0.0127032	-0.0884902
5_UPTAG0057	5	YJL160C	PIR5	UPTAG0057	-0.0498608	-0.0986996	-0.00262125
1_UPTAG0291	1	YEL053C	MAK10	UPTAG0291	-0.0498338	-0.00193997	-0.0993723
3_UPTAG0689	3	YJR096W	YJR096W	UPTAG0689	-0.0492942	-0.0462885	-0.0523061
3_UPTAG1087	3	YNL269W	BSC4	UPTAG1087	-0.0489833	-0.0835356	-0.0152391
2_UPTAG0507	2	YDR453C	TSA2	UPTAG0507	-0.0485055	-0.0899253	-0.00824175
4_UPTAG0097	4	YHL042W	YHL042W	UPTAG0097	-0.0475821	-0.241156	0.123065
3_UPTAG0874	3	YJL128C	PBS2	UPTAG0874	-0.0472888	-0.114712	0.0171235
2_UPTAG0739	2	YNL023C	FAP1	UPTAG0739	-0.0471758	-0.199056	0.090227
4_UPTAG0885	4	YOR167C	RPS28A	UPTAG0885	-0.0470703	-0.0828378	-0.0121682
2_UPTAG0142	2	YLR381W	CTF3	UPTAG0142	-0.0468893	-0.0622733	-0.0316676
1_UPTAG0815	1	YNR032C-A	HUB1	UPTAG0815	-0.0466258	-0.059184	-0.034176
3_UPTAG0295	3	YCL069W	VBA3	UPTAG0295	-0.0465553	0.0831034	-0.189028
2_UPTAG0466	2	YOR351C	MEK1	UPTAG0466	-0.0465306	-0.159012	0.0578116
1_UPTAG0247	1	YHR108W	GGA2	UPTAG0247	-0.046527	-0.0479844	-0.045071
5_UPTAG0324	5	YIL102C	YIL102C	UPTAG0324	-0.0465109	-0.107622	0.0121168
4_UPTAG0335	4	YHR159W	TDA11	UPTAG0335	-0.0460565	-0.0401198	-0.0520178
5_UPTAG0358	5	YLR285C-A	YLR285C-A	UPTAG0358	-0.0459415	-0.0426098	-0.0492809
1_UPTAG0840	1	YLR450W	HMG2	UPTAG0840	-0.0458023	-0.0555019	-0.0361673
2_UPTAG0944	2	YPR073C	LTP1	UPTAG0944	-0.0454919	-0.135618	0.0393333
4_UPTAG0253	4	YOR111W	YOR111W	UPTAG0253	-0.0452319	-0.0443366	-0.0461277
2_UPTAG0093	2	YDL127W	PCL2	UPTAG0093	-0.0452016	0.104921	-0.21278
3_UPTAG0733	3	YGL156W	AMS1	UPTAG0733	-0.045193	-0.0202279	-0.0705978
2_UPTAG0285	2	YGR230W	BNS1	UPTAG0285	-0.0451611	-0.0597174	-0.0307502
2_UPTAG0879	2	YJL110C	GZF3	UPTAG0879	-0.0451459	-0.108521	0.015562
3_UPTAG0165	3	YDR342C	HXT7	UPTAG0165	-0.0450167	-0.0922209	0.000691712
5_UPTAG0317	5	YHR213W	YHR213W	UPTAG0317	-0.0446997	-0.134397	0.0397454
3_UPTAG0479	3	YBL059W	YBL059W	UPTAG0479	-0.044687	0.0991153	-0.204426
5_UPTAG0175	5	YKL191W	DPH2	UPTAG0175	-0.0445753	-0.116937	0.0243296
4_UPTAG0579	4	YHR080C	LAM4	UPTAG0579	-0.0445103	0.0704517	-0.169432
5_UPTAG0173	5	YKL157W	APE2	UPTAG0173	-0.0444069	0.120609	-0.230765
3_UPTAG0732	3	YBR149W	ARA1	UPTAG0732	-0.0443759	-0.150661	0.0546135
3_UPTAG1145	3	YBR280C	SAF1	UPTAG1145	-0.0442775	-0.0838032	-0.00580586
2_UPTAG1066	2	YIR005W	IST3	UPTAG1066	-0.0442108	0.013978	-0.104846
2_UPTAG0045	2	YBR284W	YBR284W	UPTAG0045	-0.0441941	0.0232832	-0.114983
2_UPTAG0564	2	YDR206W	EBS1	UPTAG0564	-0.0441603	-0.045538	-0.0427838
3_UPTAG0615	3	YOL027C	MDM38	UPTAG0615	-0.0440442	-0.104428	0.0139134
3_UPTAG1144	3	YBR270C	BIT2	UPTAG1144	-0.0438111	-0.119293	0.0279168
3_UPTAG0775	3	YDL189W	RBS1	UPTAG0775	-0.043767	0.167556	-0.291446
4_UPTAG0185	4	YLR415C	YLR415C	UPTAG0185	-0.0436267	-0.127047	0.0352322
1_UPTAG0401	1	YKR035W-A	DID2	UPTAG0401	-0.0434415	-0.0264947	-0.0605896
2_UPTAG0858	2	YKL057C	NUP120	UPTAG0858	-0.0432349	-0.205794	0.102848
3_UPTAG0057	3	YNL291C	MID1	UPTAG0057	-0.0430081	-0.0757074	-0.0110336
3_UPTAG0677	3	YCR105W	ADH7	UPTAG0677	-0.043006	-0.1338	0.0424105
1_UPTAG0038	1	YMR071C	TVP18	UPTAG0038	-0.0429308	0.01002	-0.0978994
5_UPTAG0540	5	YMR158C-A	YMR158C-A	UPTAG0540	-0.0428944	0.0971332	-0.197988
1_UPTAG0109	1	YLR073C	RFU1	UPTAG0109	-0.0424477	-0.0124829	-0.0730481
1_UPTAG0095	1	YNR021W	YNR021W	UPTAG0095	-0.042393	-0.0400029	-0.0447871
3_UPTAG0729	3	YBR204C	LDH1	UPTAG0729	-0.0423406	-0.0754366	-0.00998688
5_UPTAG0627	5	YBR056W-A	YBR056W-A	UPTAG0627	-0.0422986	-0.0144881	-0.0706557
1_UPTAG1086	1	YHR139C	SPS100	UPTAG1086	-0.0420932	0.0468272	-0.136856
4_UPTAG0095	4	YGR294W	PAU12	UPTAG0095	-0.0419909	0.0270095	-0.114458
4_UPTAG0958	4	YLR344W	RPL26A	UPTAG0958	-0.0418141	-0.00755266	-0.076909
4_UPTAG0308	4	YCL056C	PEX34	UPTAG0308	-0.041694	-0.0352707	-0.0481461
5_UPTAG0051	5	YBR241C	YBR241C	UPTAG0051	-0.0414079	-0.104046	0.0186232
4_UPTAG0067	4	YFR039C	OSW7	UPTAG0067	-0.0414017	0.0170641	-0.102337
5_UPTAG0722	5	YKR078W	YKR078W	UPTAG0722	-0.0413916	-0.101269	0.0160995
3_UPTAG1076	3	YGR001C	EFM5	UPTAG1076	-0.0413471	-0.0260282	-0.0568303
3_UPTAG0826	3	YDL109C	YDL109C	UPTAG0826	-0.0411366	0.195958	-0.325009
3_UPTAG0100	3	YOL075C	YOL075C	UPTAG0100	-0.0410772	-0.150867	0.0609452
3_UPTAG0226	3	YJL214W	HXT8	UPTAG0226	-0.0409538	0.0437616	-0.130956
4_UPTAG0985	4	YIL148W	RPL40A	UPTAG0985	-0.0408096	-0.060161	-0.0217144
5_UPTAG0595	5	YOR072W-B	YOR072W-B	UPTAG0595	-0.0405648	-0.0284655	-0.0527663
4_UPTAG0302	4	YBL107C	MIX23	UPTAG0302	-0.0405455	-0.0676183	-0.0139714
2_UPTAG0712	2	YJR119C	JHD2	UPTAG0712	-0.0402866	-0.164998	0.0744965
4_UPTAG0998	4	YOR150W	MRPL23	UPTAG0998	-0.0398596	0.140042	-0.245434
4_UPTAG0879	4	YIL069C	RPS24B	UPTAG0879	-0.0398162	-0.0140354	-0.0660661
1_UPTAG0354	1	YKL010C	UFD4	UPTAG0354	-0.0397215	-0.192878	0.0987255
1_UPTAG0036	1	YMR237W	BCH1	UPTAG0036	-0.0393889	-0.0896628	0.00919202
3_UPTAG0761	3	YMR083W	ADH3	UPTAG0761	-0.0392492	-0.0916434	0.0113087
4_UPTAG0317	4	YDR222W	YDR222W	UPTAG0317	-0.039139	0.0274702	-0.108973
2_UPTAG0459	2	YIL035C	CKA1	UPTAG0459	-0.038411	0.0818185	-0.169579
2_UPTAG0733	2	YJR082C	EAF6	UPTAG0733	-0.0380959	-0.029917	-0.0463215
1_UPTAG0277	1	YDR486C	VPS60	UPTAG0277	-0.037845	0.0352749	-0.11487
3_UPTAG0109	3	YJL036W	SNX4	UPTAG0109	-0.037521	-0.118712	0.0393436
4_UPTAG0922	4	YMR225C	MRPL44	UPTAG0922	-0.0374045	0.00067702	-0.0765186
4_UPTAG0371	4	YLR392C	ART10	UPTAG0371	-0.0373823	0.091142	-0.178486
3_UPTAG0945	3	YDR213W	UPC2	UPTAG0945	-0.0372052	-0.179695	0.0924675
4_UPTAG0487	4	YKR077W	MSA2	UPTAG0487	-0.0371814	-0.0248249	-0.0496446
4_UPTAG0783	4	YDL033C	SLM3	UPTAG0783	-0.0370739	0.0269604	-0.104083
4_UPTAG0857	4	YJR094W-A	RPL43B	UPTAG0857	-0.0366051	-0.112443	0.035445
2_UPTAG0527	2	YOR113W	AZF1	UPTAG0527	-0.0364064	-0.0102541	-0.0630416
2_UPTAG1109	2	YOL089C	HAL9	UPTAG1109	-0.0361484	0.0276256	-0.102872
1_UPTAG0952	1	YER027C	GAL83	UPTAG0952	-0.0360923	-0.0876574	0.0136931
4_UPTAG0293	4	YGR187C	HGH1	UPTAG0293	-0.0358473	-0.102724	0.028066
4_UPTAG0867	4	YOR369C	RPS12	UPTAG0867	-0.0357158	-0.174748	0.0910874
2_UPTAG0126	2	YLR288C	MEC3	UPTAG0126	-0.0356357	-0.081674	0.00897877
4_UPTAG0653	4	YKL077W	YKL077W	UPTAG0653	-0.03562	0.0265807	-0.100624
2_UPTAG0239	2	YGL090W	LIF1	UPTAG0239	-0.0353062	0.0124414	-0.0846884
4_UPTAG0569	4	YJL151C	SNA3	UPTAG0569	-0.0352625	-0.0950827	0.0221757
2_UPTAG0702	2	YER139C	RTR1	UPTAG0702	-0.0349659	-0.191499	0.106234
1_UPTAG0106	1	YGL079W	KXD1	UPTAG0106	-0.034932	0.0340059	-0.10733
1_UPTAG0947	1	YNR030W	ALG12	UPTAG0947	-0.0348283	-0.131424	0.0557032
4_UPTAG0939	4	YER050C	RSM18	UPTAG0939	-0.0348167	-0.214394	0.124862
4_UPTAG0094	4	YGR273C	YGR273C	UPTAG0094	-0.0346407	0.00873087	-0.0793566
3_UPTAG0788	3	YGR254W	ENO1	UPTAG0788	-0.034594	0.0413196	-0.114725
4_UPTAG0753	4	YER046W	SPO73	UPTAG0753	-0.0345329	-0.132818	0.057481
4_UPTAG0977	4	YDL044C	MTF2	UPTAG0977	-0.0345266	0.0543011	-0.129185
3_UPTAG1099	3	YPL250C	ATG41	UPTAG1099	-0.0343922	-0.248915	0.152323
5_UPTAG0318	5	YHR213W-A	YHR213W-A	UPTAG0318	-0.0343617	-0.0373862	-0.0313435
3_UPTAG0898	3	YPL087W	YDC1	UPTAG0898	-0.0343132	0.0994657	-0.181777
3_UPTAG0735	3	YDR272W	GLO2	UPTAG0735	-0.0343011	-0.0785297	0.00861179
4_UPTAG0358	4	YLL032C	YLL032C	UPTAG0358	-0.0342849	-0.139687	0.0639382
1_UPTAG0748	1	YJL201W	ECM25	UPTAG0748	-0.0340592	0.0391393	-0.111171
5_UPTAG0320	5	YHR214C-D	YHR214C-D	UPTAG0320	-0.0339454	-0.153748	0.0766671
3_UPTAG0096	3	YGR197C	SNG1	UPTAG0096	-0.0339159	-0.00416701	-0.0642912
1_UPTAG0212	1	YER122C	GLO3	UPTAG0212	-0.0339124	0.0469389	-0.119565
5_UPTAG0300	5	YGR035W-A	YGR035W-A	UPTAG0300	-0.0337905	-0.0707517	0.00224732
1_UPTAG0782	1	YIL085C	KTR7	UPTAG0782	-0.0337042	-0.0806803	0.0117903
3_UPTAG0676	3	YAL054C	ACS1	UPTAG0676	-0.0336558	-0.211419	0.124587
5_UPTAG0505	5	YGL089C	MF(ALPHA)2	UPTAG0505	-0.0334559	-0.0107343	-0.0565411
5_UPTAG0158	5	YDR305C	HNT2	UPTAG0158	-0.0333386	0.0097163	-0.077718
2_UPTAG0026	2	YNL201C	PSY2	UPTAG0026	-0.0331285	-0.209589	0.124082
3_UPTAG0439	3	YER182W	FMP10	UPTAG0439	-0.0331192	0.0704924	-0.144752
5_UPTAG0483	5	YAL068C	PAU8	UPTAG0483	-0.0326088	0.0937321	-0.171085
4_UPTAG0285	4	YDR106W	ARP10	UPTAG0285	-0.0325977	-0.100938	0.0326514
2_UPTAG1014	2	YFL031W	HAC1	UPTAG1014	-0.0325219	-0.0866596	0.0196575
1_UPTAG0614	1	YDR379W	RGA2	UPTAG0614	-0.0321736	-0.120255	0.0508378
1_UPTAG0857	1	YKR102W	FLO10	UPTAG0857	-0.032118	-0.0212642	-0.0430541
2_UPTAG1125	2	YER063W	THO1	UPTAG1125	-0.0319891	-0.0993886	0.0324016
3_UPTAG0406	3	YDL067C	COX9	UPTAG0406	-0.0319196	-0.000978035	-0.0635394
3_UPTAG0731	3	YLR387C	REH1	UPTAG0731	-0.0318816	-0.053899	-0.0101951
5_UPTAG0144	5	YNL304W	YPT11	UPTAG0144	-0.0318259	-0.100604	0.0338224
1_UPTAG1075	1	YFL047W	RGD2	UPTAG1075	-0.0317797	0.136222	-0.221956
3_UPTAG0143	3	YLL027W	ISA1	UPTAG0143	-0.0317529	-0.227554	0.140622
1_UPTAG0506	1	YDL077C	VAM6	UPTAG0506	-0.0313707	-0.0695824	0.00585498
5_UPTAG0169	5	YIL145C	PAN6	UPTAG0169	-0.0313194	0.070597	-0.140987
4_UPTAG1013	4	YGR220C	MRPL9	UPTAG1013	-0.0311324	-0.0013534	-0.061539
1_UPTAG0601	1	YER149C	PEA2	UPTAG0601	-0.0306902	-0.0190671	-0.0424076
3_UPTAG0099	3	YKR104W	YKR104W	UPTAG0099	-0.0304312	-0.088323	0.0252268
5_UPTAG0309	5	YHL048C-A	YHL048C-A	UPTAG0309	-0.0304308	0.0403512	-0.104866
3_UPTAG0859	3	YDR465C	RMT2	UPTAG0859	-0.0301685	0.0502685	-0.115356
5_UPTAG0632	5	YBR196C-A	YBR196C-A	UPTAG0632	-0.0301278	-0.0801447	0.0182129
3_UPTAG0819	3	YNL117W	MLS1	UPTAG0819	-0.0299914	-0.0208372	-0.0392041
1_UPTAG1100	1	YGR225W	AMA1	UPTAG1100	-0.0299323	0.00360592	-0.0642688
1_UPTAG0672	1	YAL053W	FLC2	UPTAG0672	-0.0298962	0.0578726	-0.123352
3_UPTAG0814	3	YFR015C	GSY1	UPTAG0814	-0.0297613	0.0591595	-0.124525
2_UPTAG1088	2	YNL236W	SIN4	UPTAG1088	-0.0297009	0.0148852	-0.075709
5_UPTAG0052	5	YDL036C	PUS9	UPTAG0052	-0.0291119	0.0142078	-0.0737728
3_UPTAG0419	3	YJL166W	QCR8	UPTAG0419	-0.0291093	-0.161028	0.0917513
1_UPTAG0058	1	YLR351C	NIT3	UPTAG0058	-0.0288645	-0.18298	0.110365
4_UPTAG0112	4	YIL024C	YIL024C	UPTAG0112	-0.0288463	-0.0178321	-0.0399453
4_UPTAG0343	4	YJL016W	YJL016W	UPTAG0343	-0.0284808	-0.324929	0.217314
2_UPTAG0917	2	YOL028C	YAP7	UPTAG0917	-0.0279053	0.0354857	-0.0942102
4_UPTAG1007	4	YDR494W	RSM28	UPTAG1007	-0.0276211	0.1283	-0.202459
1_UPTAG0860	1	YLR299W	ECM38	UPTAG0860	-0.0274509	0.110659	-0.180195
3_UPTAG0286	3	YDR322C-A	TIM11	UPTAG0286	-0.0270027	0.0857959	-0.149374
2_UPTAG1043	2	YPL029W	SUV3	UPTAG1043	-0.026917	-0.0916014	0.0349913
3_UPTAG1070	3	YOR396W	YRF1-8	UPTAG1070	-0.0268637	-0.0642097	0.00953987
1_UPTAG0037	1	YGL083W	SCY1	UPTAG0037	-0.0267686	-0.0216483	-0.0319072
1_UPTAG0173	1	YCR053W	THR4	UPTAG0173	-0.0267415	-0.174773	0.107505
[truncated: 2,246 more rows]

## Sheet: DownTag
	Plate	ORF	Gene	TAG	average_log2	data2012_log2	data2013_log2
1_DNTAG0001	1	YOR094W	ARF3	DNTAG0001	0.363561	0.113763	0.576424
1_DNTAG0003	1	YDL161W	ENT1	DNTAG0003	0.0321518	0.105903	-0.0455738
1_DNTAG0004	1	YLR206W	ENT2	DNTAG0004	0.0274609	0.0837014	-0.0310612
1_DNTAG0005	1	YLL038C	ENT4	DNTAG0005	-0.00173675	-0.0354649	0.0312209
1_DNTAG0006	1	YHR016C	YSC84	DNTAG0006	0.0586171	0.0388491	0.0781179
1_DNTAG0008	1	YNL293W	MSB3	DNTAG0008	-0.307877	-0.144728	-0.491856
1_DNTAG0009	1	YCL034W	LSB5	DNTAG0009	-0.152905	-0.160039	-0.145805
1_DNTAG0010	1	YBR128C	ATG14	DNTAG0010	0.100782	0.26098	-0.0794535
1_DNTAG0011	1	YMR159C	ATG16	DNTAG0011	0.00690412	-0.141144	0.141163
1_DNTAG0012	1	YPL100W	ATG21	DNTAG0012	-0.0365449	0.0622678	-0.142626
1_DNTAG0013	1	YCR068W	ATG15	DNTAG0013	-0.0991603	-0.165519	-0.0357199
1_DNTAG0014	1	YOL007C	CSI2	DNTAG0014	-0.022242	0.0918566	-0.146145
1_DNTAG0015	1	YER150W	SPI1	DNTAG0015	-0.165881	-0.178545	-0.153327
1_DNTAG0016	1	YIR039C	YPS6	DNTAG0016	-0.329178	-0.391353	-0.269572
1_DNTAG0017	1	YOR034C	AKR2	DNTAG0017	-0.0369065	-0.0634073	-0.0108837
1_DNTAG0018	1	YHR057C	CPR2	DNTAG0018	0.056679	-0.119603	0.213747
1_DNTAG0019	1	YLR361C	DCR2	DNTAG0019	-0.122173	-0.236806	-0.0159813
1_DNTAG0020	1	YER039C	HVG1	DNTAG0020	-0.0512883	-0.120036	0.0143315
1_DNTAG0021	1	YJL223C	PAU1	DNTAG0021	-0.0731431	0.127246	-0.305926
1_DNTAG0022	1	YEL049W	PAU2	DNTAG0022	0.0277041	0.143459	-0.0981544
1_DNTAG0023	1	YCR104W	PAU3	DNTAG0023	-0.359285	-0.541099	-0.19784
1_DNTAG0024	1	YLR461W	PAU4	DNTAG0024	0.103755	0.00839782	0.193198
1_DNTAG0025	1	YFL020C	PAU5	DNTAG0025	-0.0617704	-0.0766191	-0.0470729
1_DNTAG0027	1	YKR098C	UBP11	DNTAG0027	-0.17286	0.0194115	-0.394755
1_DNTAG0028	1	YDL206W	YDL206W	DNTAG0028	0.199586	0.108815	0.284983
1_DNTAG0029	1	YFL040W	YFL040W	DNTAG0029	0.144685	-0.000651812	0.27671
1_DNTAG0030	1	YFR018C	YFR018C	DNTAG0030	0.0718149	-0.16049	0.27185
1_DNTAG0031	1	YGL081W	YGL081W	DNTAG0031	-0.115509	-0.667987	0.283008
1_DNTAG0032	1	YLR057W	MNL2	DNTAG0032	-0.0654931	-0.0536192	-0.0774655
1_DNTAG0033	1	YNR071C	YNR071C	DNTAG0033	-0.146609	-0.147864	-0.145354
1_DNTAG0034	1	YPR084W	YPR084W	DNTAG0034	-0.251544	-0.284759	-0.219077
1_DNTAG0035	1	YGL259W	YPS5	DNTAG0035	-0.190259	0.0391381	-0.463158
1_DNTAG0036	1	YMR237W	BCH1	DNTAG0036	-0.173962	-0.114116	-0.236398
1_DNTAG0037	1	YGL083W	SCY1	DNTAG0037	0.197543	0.456602	-0.118443
1_DNTAG0038	1	YMR071C	TVP18	DNTAG0038	-0.0923544	-0.312002	0.0982284
1_DNTAG0039	1	YBL010C	YBL010C	DNTAG0039	0.064432		0.064432
1_DNTAG0041	1	YHL017W	YHL017W	DNTAG0041	0.00987265	-0.209232	0.200047
1_DNTAG0042	1	YJL207C	LAA1	DNTAG0042	-0.132847	-0.1387	-0.127017
1_DNTAG0044	1	YOL137W	BSC6	DNTAG0044	0.0785744	-0.0547853	0.200643
1_DNTAG0045	1	YDR100W	TVP15	DNTAG0045	0.111685	-0.0829828	0.28318
1_DNTAG0046	1	YER101C	AST2	DNTAG0046	0.00177156	0.044341	-0.0420923
1_DNTAG0047	1	YDR371W	CTS2	DNTAG0047	-0.28405	-0.224082	-0.34662
1_DNTAG0048	1	YDR084C	TVP23	DNTAG0048	-0.149562	-0.091991	-0.209526
1_DNTAG0049	1	YKR088C	TVP38	DNTAG0049	-0.0378291	-0.0879347	0.0105946
1_DNTAG0050	1	YEL005C	VAB2	DNTAG0050	-0.0140809	-0.00124472	-0.0270324
1_DNTAG0051	1	YBL104C	SEA4	DNTAG0051	0.0238816	0.0109592	0.0366892
1_DNTAG0052	1	YIR035C	YIR035C	DNTAG0052	-0.236572	-0.0822483	-0.409403
1_DNTAG0053	1	YOR112W	CEX1	DNTAG0053	-0.0272119	0.0726167	-0.134465
1_DNTAG0055	1	YDR304C	CPR5	DNTAG0055	-0.0608987	-0.20542	0.0704544
1_DNTAG0056	1	YML101C	CUE4	DNTAG0056	-0.458781	-0.426541	-0.491758
1_DNTAG0057	1	YGR223C	HSV2	DNTAG0057	-0.0288373	0.00389715	-0.0623317
1_DNTAG0058	1	YLR351C	NIT3	DNTAG0058	0.0229623	0.0454162	0.000153455
1_DNTAG0059	1	YJL123C	MTC1	DNTAG0059	-0.0564608	0.0135747	-0.13007
1_DNTAG0060	1	YJR015W	YJR015W	DNTAG0060	0.0431118	-0.158725	0.220145
1_DNTAG0061	1	YPL105C	SYH1	DNTAG0061	-0.0865833	-0.310599	0.107278
1_DNTAG0062	1	YDR349C	YPS7	DNTAG0062	0.362228	0.428146	0.293153
1_DNTAG0063	1	YDR411C	DFM1	DNTAG0063	0.291995	0.255827	0.327278
1_DNTAG0064	1	YFR041C	ERJ5	DNTAG0064	0.0273365	-0.0813576	0.128412
1_DNTAG0065	1	YJR118C	ILM1	DNTAG0065	-0.0251644	0.0165134	-0.0680822
1_DNTAG0067	1	YNL156C	NSG2	DNTAG0067	0.279339	0.0540333	0.474165
1_DNTAG0068	1	YMR123W	PKR1	DNTAG0068	-0.265828	-0.270105	-0.261564
1_DNTAG0069	1	YDL204W	RTN2	DNTAG0069	-0.118133	0.0314166	-0.284997
1_DNTAG0070	1	YHR181W	SVP26	DNTAG0070	0.110082	0.140863	0.0786295
1_DNTAG0071	1	YBR273C	UBX7	DNTAG0071	-0.23791	-0.191992	-0.285339
1_DNTAG0072	1	YBR096W	YBR096W	DNTAG0072	0.0792171	-0.464646	0.473258
1_DNTAG0073	1	YCL045C	EMC1	DNTAG0073	0.371676	0.299555	0.440363
1_DNTAG0075	1	YDR221W	GTB1	DNTAG0075	0.20309	0.188947	0.217096
1_DNTAG0076	1	YDR307W	PMT7	DNTAG0076	0.0665346	0.0269529	0.105059
1_DNTAG0077	1	YDR476C	YDR476C	DNTAG0077	-0.108627	-0.179371	-0.041191
1_DNTAG0078	1	YEL001C	IRC22	DNTAG0078	0.162161	0.0329347	0.280758
1_DNTAG0080	1	YER053C-A	YER053C-A	DNTAG0080	0.128806	0.0163601	0.233118
1_DNTAG0081	1	YKL065C	YET1	DNTAG0081	0.0386987	0.0301212	0.0472255
1_DNTAG0083	1	YGL010W	MPO1	DNTAG0083	0.00447024	-0.0131278	0.0218562
1_DNTAG0084	1	YGL231C	EMC4	DNTAG0084	-0.197535	-0.0605129	-0.34895
1_DNTAG0085	1	YGR263C	SAY1	DNTAG0085	0.0925968	0.147118	0.0359336
1_DNTAG0086	1	YHR045W	YHR045W	DNTAG0086	0.203097	0.120792	0.280959
1_DNTAG0087	1	YIL039W	TED1	DNTAG0087	0.166332	0.302676	0.0157458
1_DNTAG0088	1	YJR088C	EMC2	DNTAG0088	0.208936	0.144087	0.270996
1_DNTAG0089	1	YLL014W	EMC6	DNTAG0089	0.100168	0.101581	0.0987542
1_DNTAG0090	1	YLL023C	POM33	DNTAG0090	-0.0378919	-0.065558	-0.0107464
1_DNTAG0091	1	YLR050C	YLR050C	DNTAG0091	-0.0135289	-0.0185293	-0.00854568
1_DNTAG0092	1	YLR064W	PER33	DNTAG0092	0.178702	0.25182	0.101679
1_DNTAG0093	1	YNL046W	YNL046W	DNTAG0093	0.162127	0.154403	0.169811
1_DNTAG0094	1	YNL146W	YNL146W	DNTAG0094	0.079809	0.114788	0.0439605
1_DNTAG0095	1	YNR021W	YNR021W	DNTAG0095	0.163114	0.0428568	0.274114
1_DNTAG0096	1	YOR044W	IRC23	DNTAG0096	0.0283731	-0.137232	0.176911
1_DNTAG0098	1	YPL207W	TYW1	DNTAG0098	0.0476512	0.0428098	0.0524765
1_DNTAG0099	1	YPR003C	YPR003C	DNTAG0099	0.240817	0.273477	0.207399
1_DNTAG0100	1	YPR063C	YPR063C	DNTAG0100	0.286282	0.303424	0.268933
1_DNTAG0101	1	YPR091C	NVJ2	DNTAG0101	-0.0670739	-0.128092	-0.00853257
1_DNTAG0102	1	YPR114W	YPR114W	DNTAG0102	0.277529	0.184415	0.364996
1_DNTAG0103	1	YBR287W	YBR287W	DNTAG0103	0.0344263		0.0344263
1_DNTAG0104	1	YDR519W	FPR2	DNTAG0104	0.0902374	0.19457	-0.0222321
1_DNTAG0105	1	YDR056C	EMC10	DNTAG0105	0.154947	0.24558	0.0582372
1_DNTAG0106	1	YGL079W	KXD1	DNTAG0106	0.167286	0.0357782	0.287801
1_DNTAG0107	1	YGR206W	MVB12	DNTAG0107	0.0366512	-0.113885	0.172954
1_DNTAG0108	1	YKL061W	BLI1	DNTAG0108	-0.0297312	0.0430917	-0.106426
1_DNTAG0109	1	YLR073C	RFU1	DNTAG0109	0.0267754	0.150043	-0.108017
1_DNTAG0110	1	YLR408C	BLS1	DNTAG0110	-0.0539742	-0.108048	-0.0018544
1_DNTAG0111	1	YMR171C	EAR1	DNTAG0111	-0.145027	0.0602767	-0.384472
1_DNTAG0112	1	YNL086W	SNN1	DNTAG0112	-0.0161899	-0.205152	0.150864
1_DNTAG0113	1	YHR105W	YPT35	DNTAG0113	-0.285799	-0.361658	-0.213731
1_DNTAG0116	1	YPL246C	RBD2	DNTAG0116	-0.321119	-0.210831	-0.440541
1_DNTAG0117	1	YJR134C	SGM1	DNTAG0117	0.301337	0.107797	0.471958
1_DNTAG0118	1	YER113C	TMN3	DNTAG0118	0.289861	0.271343	0.308144
1_DNTAG0119	1	YOL107W	YOL107W	DNTAG0119	0.247257	0.336625	0.151985
1_DNTAG0121	1	YOR311C	DGK1	DNTAG0121	-0.121504	-0.265225	0.00918747
1_DNTAG0122	1	YDR275W	BSC2	DNTAG0122	-0.2007	-0.238311	-0.164044
1_DNTAG0123	1	YCR069W	CPR4	DNTAG0123	0.360476	0.243773	0.46844
1_DNTAG0124	1	YDR107C	TMN2	DNTAG0124	-0.276967	-0.26432	-0.289725
1_DNTAG0125	1	YER170W	ADK2	DNTAG0125	0.118369	-0.0828876	0.294956
1_DNTAG0126	1	YKR027W	BCH2	DNTAG0126	0.0824805	0.189208	-0.0327781
1_DNTAG0127	1	YDR033W	MRH1	DNTAG0127	-0.0467189	0.182986	-0.320054
1_DNTAG0128	1	YER049W	TPA1	DNTAG0128	0.0985981	-0.240364	0.372878
1_DNTAG0129	1	YLR151C	PCD1	DNTAG0129	-0.313953	-0.217721	-0.417067
1_DNTAG0130	1	YMR204C	INP1	DNTAG0130	0.078253	0.260142	-0.129921
1_DNTAG0131	1	YOL019W	YOL019W	DNTAG0131	0.0039867	0.105449	-0.105155
1_DNTAG0132	1	YKR007W	MEH1	DNTAG0132	0.00191685	0.169621	-0.187877
1_DNTAG0133	1	YDR119W	VBA4	DNTAG0133	0.0084246	0.0328214	-0.0163918
1_DNTAG0134	1	YDR352W	YPQ2	DNTAG0134	0.0834559	0.065925	0.100776
1_DNTAG0135	1	YNR028W	CPR8	DNTAG0135	-0.0606649	0.0540804	-0.185331
1_DNTAG0137	1	YDL010W	GRX6	DNTAG0137	-0.0531827	0.00101266	-0.109494
1_DNTAG0138	1	YHL008C	YHL008C	DNTAG0138	-0.142894	-0.19683	-0.0909028
1_DNTAG0139	1	YBR014C	GRX7	DNTAG0139	-0.0507675	0.0328659	-0.139549
1_DNTAG0140	1	YER014C-A	BUD25	DNTAG0140	-0.104932	-0.436809	0.164696
1_DNTAG0141	1	YOR299W	BUD7	DNTAG0141	-0.164816	-0.131421	-0.199002
1_DNTAG0143	1	YDR006C	SOK1	DNTAG0143	-0.234888	-0.260808	-0.209425
1_DNTAG0144	1	YNL323W	LEM3	DNTAG0144	0.0680807	0.131466	0.0017815
1_DNTAG0146	1	YBL101C	ECM21	DNTAG0146	-0.137744	-0.0264964	-0.258293
1_DNTAG0147	1	YOR092W	ECM3	DNTAG0147	0.225255	0.227401	0.223107
1_DNTAG0148	1	YER083C	GET2	DNTAG0148	0.00232166	0.0349469	-0.0310585
1_DNTAG0149	1	YIL002C	INP51	DNTAG0149	0.154862	0.0342512	0.266164
1_DNTAG0150	1	YNL106C	INP52	DNTAG0150	-0.0635421	-0.156031	0.0233729
1_DNTAG0151	1	YOR109W	INP53	DNTAG0151	-0.0800715	-0.0938782	-0.0663957
1_DNTAG0153	1	YMR140W	SIP5	DNTAG0153	0.003343	0.051045	-0.0459903
1_DNTAG0154	1	YJR060W	CBF1	DNTAG0154	0.446975	0.418447	0.47495
1_DNTAG0155	1	YER120W	SCS2	DNTAG0155	-0.0285483	0.110298	-0.182194
1_DNTAG0156	1	YGL053W	PRM8	DNTAG0156	0.123388	0.037664	0.204302
1_DNTAG0157	1	YBR283C	SSH1	DNTAG0157	0.0678595	0.0815209	0.0540675
1_DNTAG0158	1	YER019C-A	SBH2	DNTAG0158	-0.0185186	0.106529	-0.155442
1_DNTAG0161	1	YCR036W	RBK1	DNTAG0161	0.611493	0.762635	0.442643
1_DNTAG0162	1	YHR161C	YAP1801	DNTAG0162	-0.0273711	0.0859222	-0.150325
1_DNTAG0163	1	YGR241C	YAP1802	DNTAG0163	-0.0276083	-0.202109	0.128045
1_DNTAG0165	1	YNR075W	COS10	DNTAG0165	-0.0452478	-0.176241	0.0748356
1_DNTAG0166	1	YNL227C	JJJ1	DNTAG0166	0.0884293	0.156219	0.0172964
1_DNTAG0167	1	YPL032C	SVL3	DNTAG0167	-0.0672875	0.0913176	-0.245508
1_DNTAG0168	1	YDL231C	BRE4	DNTAG0168	0.0491421	0.0448618	0.0534097
1_DNTAG0171	1	YDR388W	RVS167	DNTAG0171	0.0470423	0.103254	-0.0114487
1_DNTAG0172	1	YCR009C	RVS161	DNTAG0172	0.139261	0.159689	0.11854
1_DNTAG0173	1	YCR053W	THR4	DNTAG0173	0.0880686	0.274624	-0.126244
1_DNTAG0174	1	YDR264C	AKR1	DNTAG0174	0.956737	0.902793	1.00874
1_DNTAG0175	1	YDR036C	EHD3	DNTAG0175	-0.0752455	0.0122408	-0.168382
1_DNTAG0176	1	YDR069C	DOA4	DNTAG0176	-0.0636079	-0.391766	0.203565
1_DNTAG0178	1	YAL030W	SNC1	DNTAG0178	0.135769	0.145407	0.126066
1_DNTAG0179	1	YOR327C	SNC2	DNTAG0179	0.0328891	-0.0477116	0.109224
1_DNTAG0180	1	YBR207W	FTH1	DNTAG0180	-0.150097	-0.135775	-0.164563
1_DNTAG0181	1	YIL090W	ICE2	DNTAG0181	0.0384017	0.00995799	0.0662954
1_DNTAG0182	1	YDR320C	SWA2	DNTAG0182	0.0966858	0.169775	0.019695
1_DNTAG0183	1	YNL049C	SFB2	DNTAG0183	0.194809	0.0505141	0.325976
1_DNTAG0184	1	YAL007C	ERP2	DNTAG0184	-0.0878363	0.108659	-0.315379
1_DNTAG0185	1	YML012W	ERV25	DNTAG0185	-0.285657	-0.359404	-0.215498
1_DNTAG0186	1	YGR284C	ERV29	DNTAG0186	0.00214132	-0.0114662	0.0156217
1_DNTAG0187	1	YNL044W	YIP3	DNTAG0187	-0.0479664	-0.0886345	-0.00841323
1_DNTAG0188	1	YCR067C	SED4	DNTAG0188	0.209825	0.187975	0.231349
1_DNTAG0190	1	YDR057W	YOS9	DNTAG0190	-0.0717254	0.0371707	-0.189517
1_DNTAG0191	1	YHR098C	SFB3	DNTAG0191	0.971621	0.93092	1.01121
1_DNTAG0192	1	YJL192C	SOP4	DNTAG0192	0.0106339	-0.0683045	0.0854763
1_DNTAG0193	1	YOR216C	RUD3	DNTAG0193	-0.0328707	0.0324514	-0.101291
1_DNTAG0194	1	YFL048C	EMP47	DNTAG0194	-0.0436177	-0.0302456	-0.0571149
1_DNTAG0195	1	YLR080W	EMP46	DNTAG0195	-0.121013	-0.0232732	-0.22586
1_DNTAG0196	1	YML067C	ERV41	DNTAG0196	0.0841601	0.216414	-0.061453
1_DNTAG0197	1	YAL042W	ERV46	DNTAG0197	-0.109215	-0.0155091	-0.209433
1_DNTAG0198	1	YAR002C-A	ERP1	DNTAG0198	-0.0356871	0.0713908	-0.151354
1_DNTAG0199	1	YGR166W	TRS65	DNTAG0199	0.325145	0.0559511	0.551922
1_DNTAG0200	1	YOR115C	TRS33	DNTAG0200	-0.198907	-0.00746592	-0.419695
1_DNTAG0201	1	YIL044C	AGE2	DNTAG0201	-0.0825639	0.178748	-0.401913
1_DNTAG0202	1	YIL076W	SEC28	DNTAG0202	0.349675	0.138383	0.533939
1_DNTAG0203	1	YCL001W	RER1	DNTAG0203	-0.0609359	-0.0379638	-0.0842797
1_DNTAG0204	1	YDR524C	AGE1	DNTAG0204	0.321492	0.754742	-0.300598
1_DNTAG0205	1	YDL226C	GCS1	DNTAG0205	0.860094	0.709864	0.996146
1_DNTAG0206	1	YDL192W	ARF1	DNTAG0206	-0.172755	-0.207561	-0.138768
1_DNTAG0207	1	YDL137W	ARF2	DNTAG0207	-0.063871	-0.124648	-0.00555158
1_DNTAG0208	1	YHR142W	CHS7	DNTAG0208	0.28898	0.0554011	0.489958
1_DNTAG0209	1	YGL054C	ERV14	DNTAG0209	0.266944	-0.0189811	0.505467
1_DNTAG0210	1	YGL200C	EMP24	DNTAG0210	-0.0796966	-0.223883	0.05138
1_DNTAG0211	1	YLR268W	SEC22	DNTAG0211	-0.0233208	0.0313366	-0.0801308
1_DNTAG0212	1	YER122C	GLO3	DNTAG0212	0.112046	0.320856	-0.132185
1_DNTAG0213	1	YMR292W	GOT1	DNTAG0213	0.0441077	-0.0546952	0.136576
1_DNTAG0214	1	YJR031C	GEA1	DNTAG0214	-0.0700183	0.0316172	-0.17936
1_DNTAG0216	1	YDR108W	TRS85	DNTAG0216	-0.163239	-0.15998	-0.166505
1_DNTAG0217	1	YLR207W	HRD3	DNTAG0217	-0.0386868	-0.101992	0.0219566
1_DNTAG0218	1	YHR204W	MNL1	DNTAG0218	0.00252765	0.0742718	-0.0729719
1_DNTAG0219	1	YBR201W	DER1	DNTAG0219	-0.169835	-0.120087	-0.221361
1_DNTAG0220	1	YOL013C	HRD1	DNTAG0220	0.123761	0.248328	-0.0125861
1_DNTAG0222	1	YNL064C	YDJ1	DNTAG0222	0.100913	0.138856	0.0619444
1_DNTAG0223	1	YFL025C	BST1	DNTAG0223	0.115369	-0.169819	0.353379
1_DNTAG0224	1	YMR264W	CUE1	DNTAG0224	0.170862	0.115389	0.224281
1_DNTAG0225	1	YKL079W	SMY1	DNTAG0225	-0.337122	-0.268689	-0.408964
1_DNTAG0226	1	YOL065C	INP54	DNTAG0226	0.186288	-0.0430633	0.38413
1_DNTAG0227	1	YDR122W	KIN1	DNTAG0227	-0.206907	-0.270732	-0.145786
1_DNTAG0228	1	YLR096W	KIN2	DNTAG0228	-0.162131	0.0190148	-0.369333
1_DNTAG0229	1	YPR032W	SRO7	DNTAG0229	0.0555547	-0.039576	0.144799
1_DNTAG0230	1	YBL106C	SRO77	DNTAG0230	0.085139	0.0361596	0.13251
1_DNTAG0231	1	YOR049C	RSB1	DNTAG0231	-0.00108671	-0.664018	0.45141
1_DNTAG0232	1	YPL147W	PXA1	DNTAG0232	-0.153509	-0.121725	-0.18601
1_DNTAG0233	1	YKL188C	PXA2	DNTAG0233	-0.21817	-0.0568714	-0.399799
1_DNTAG0235	1	YDR153C	ENT5	DNTAG0235	0.0825778	0.168105	-0.00834106
1_DNTAG0236	1	YBL102W	SFT2	DNTAG0236	0.110687	-0.108889	0.301217
1_DNTAG0237	1	YJL004C	SYS1	DNTAG0237	-0.341285	-0.401946	-0.283071
1_DNTAG0238	1	YJL099W	CHS6	DNTAG0238	0.00497859	-0.0734258	0.0793408
1_DNTAG0239	1	YPL195W	APL5	DNTAG0239	0.162026	0.216885	0.104999
1_DNTAG0240	1	YGR261C	APL6	DNTAG0240	-0.0981819	0.042631	-0.25424
1_DNTAG0241	1	YBR288C	APM3	DNTAG0241	-0.0559601	0.0527124	-0.17349
1_DNTAG0242	1	YJL024C	APS3	DNTAG0242	-0.181712	-0.109214	-0.258047
1_DNTAG0243	1	YJL222W	VTH2	DNTAG0243	-0.0272712	0.13519	-0.210376
1_DNTAG0245	1	YOR036W	PEP12	DNTAG0245	0.21176	-0.0304723	0.419107
1_DNTAG0246	1	YDR358W	GGA1	DNTAG0246	0.0047896	-0.102569	0.104709
1_DNTAG0247	1	YHR108W	GGA2	DNTAG0247	-0.0747699	0.0048616	-0.159055
1_DNTAG0248	1	YJL029C	VPS53	DNTAG0248	0.0932386	0.0626244	0.123217
1_DNTAG0249	1	YDR484W	VPS52	DNTAG0249	-0.339042	-0.332549	-0.345565
1_DNTAG0250	1	YDR027C	VPS54	DNTAG0250	0.0523381	-0.0270076	0.127547
1_DNTAG0251	1	YKL179C	COY1	DNTAG0251	0.507041	-0.0577828	0.911903
1_DNTAG0252	1	YOL062C	APM4	DNTAG0252	0.140574	0.0269574	0.245892
1_DNTAG0253	1	YJL044C	GYP6	DNTAG0253	0.151961	0.0925084	0.20906
1_DNTAG0254	1	YDR137W	RGP1	DNTAG0254	-0.184153	-0.111179	-0.261015
1_DNTAG0255	1	YER166W	DNF1	DNTAG0255	-0.117247	0.0391002	-0.29262
1_DNTAG0256	1	YLR039C	RIC1	DNTAG0256	0.350935	0.176115	0.506842
1_DNTAG0257	1	YDR093W	DNF2	DNTAG0257	-0.234159	-0.0632902	-0.428019
1_DNTAG0258	1	YPL051W	ARL3	DNTAG0258	-0.0153843	0.0734295	-0.110026
1_DNTAG0259	1	YMR162C	DNF3	DNTAG0259	0.0131519	-0.14181	0.153072
1_DNTAG0260	1	YGR142W	BTN2	DNTAG0260	0.0934494	-0.00809095	0.188311
1_DNTAG0261	1	YLR262C	YPT6	DNTAG0261	0.201706	-0.0165855	0.391268
1_DNTAG0262	1	YJL059W	YHC3	DNTAG0262	-0.304998	-0.241334	-0.371601
1_DNTAG0263	1	YNL051W	COG5	DNTAG0263	-0.055881	-0.0721221	-0.0398206
1_DNTAG0264	1	YNL041C	COG6	DNTAG0264	-0.19107	-0.151562	-0.23169
1_DNTAG0265	1	YML071C	COG8	DNTAG0265	0.188015	0.205437	0.17038
1_DNTAG0266	1	YGL005C	COG7	DNTAG0266	-0.00419278	-0.084087	0.0715082
1_DNTAG0268	1	YOR275C	RIM20	DNTAG0268	-0.160872	0.00232475	-0.344913
1_DNTAG0269	1	YOL116W	MSN1	DNTAG0269	-0.0287492	0.0215106	-0.0808234
1_DNTAG0271	1	YJR044C	VPS55	DNTAG0271	0.318982	0.435851	0.191805
1_DNTAG0272	1	YLR360W	VPS38	DNTAG0272	0.188497	0.186113	0.190876
1_DNTAG0273	1	YAL002W	VPS8	DNTAG0273	-0.228734	-0.235814	-0.221689
1_DNTAG0274	1	YLR025W	SNF7	DNTAG0274	-0.221763	-0.114214	-0.337981
1_DNTAG0275	1	YMR077C	VPS20	DNTAG0275	-0.118884	-0.379519	0.101792
1_DNTAG0276	1	YKL041W	VPS24	DNTAG0276	0.215166	0.195544	0.234525
1_DNTAG0277	1	YDR486C	VPS60	DNTAG0277	-0.155771	-0.154449	-0.157095
1_DNTAG0281	1	YDR492W	IZH1	DNTAG0281	-0.122137	-0.046528	-0.201929
1_DNTAG0282	1	YLR023C	IZH3	DNTAG0282	-0.0412188	-0.0115768	-0.0714826
1_DNTAG0283	1	YOL002C	IZH2	DNTAG0283	-0.039619	-0.0675702	-0.0121991
1_DNTAG0284	1	YOL101C	IZH4	DNTAG0284	-0.0114333	-0.14811	0.113408
1_DNTAG0285	1	YMR010W	YMR010W	DNTAG0285	-0.241212	-0.101974	-0.395337
1_DNTAG0286	1	YHR195W	NVJ1	DNTAG0286	0.00233874	-0.099262	0.0972527
1_DNTAG0287	1	YGL014W	PUF4	DNTAG0287	0.222774	-0.0126823	0.42514
1_DNTAG0288	1	YPL037C	EGD1	DNTAG0288	0.140832	0.108487	0.172467
1_DNTAG0289	1	YHR193C	EGD2	DNTAG0289	0.0467957	-0.262411	0.301286
1_DNTAG0290	1	YCR020C-A	MAK31	DNTAG0290	0.710408	0.642628	0.775146
1_DNTAG0291	1	YEL053C	MAK10	DNTAG0291	0.183444	0.232861	0.132274
1_DNTAG0292	1	YPR051W	MAK3	DNTAG0292	-0.186942	-0.24829	-0.128097
1_DNTAG0293	1	YIL016W	SNL1	DNTAG0293	0.146205	0.103259	0.187909
1_DNTAG0294	1	YML038C	YMD8	DNTAG0294	0.181419	0.264722	0.0930098
1_DNTAG0295	1	YKL209C	STE6	DNTAG0295	-0.133493	-0.225758	-0.0467764
1_DNTAG0296	1	YDR410C	STE14	DNTAG0296	-0.126646	-0.192945	-0.0632607
1_DNTAG0297	1	YIR004W	DJP1	DNTAG0297	0.140764	0.10817	0.172637
1_DNTAG0298	1	YNL329C	PEX6	DNTAG0298	0.00185437	-0.00212735	0.00582514
1_DNTAG0299	1	YOR084W	LPX1	DNTAG0299	-0.186649	-0.201017	-0.172423
1_DNTAG0300	1	YDR265W	PEX10	DNTAG0300	0.0518441	0.156045	-0.0604732
1_DNTAG0301	1	YMR026C	PEX12	DNTAG0301	0.00501048	0.0114094	-0.00141693
1_DNTAG0302	1	YNL214W	PEX17	DNTAG0302	0.00146925	0.0575463	-0.056876
1_DNTAG0303	1	YJL210W	PEX2	DNTAG0303	0.0590805	-0.107228	0.208183
1_DNTAG0304	1	YPL112C	PEX25	DNTAG0304	0.179141	0.168216	0.189984
1_DNTAG0305	1	YOR193W	PEX27	DNTAG0305	0.0213109	-0.152765	0.176626
1_DNTAG0306	1	YDR479C	PEX29	DNTAG0306	0.0553796	0.0801656	0.0301604
1_DNTAG0307	1	YKL197C	PEX1	DNTAG0307	-0.0221226	-0.0695651	0.0238093
1_DNTAG0308	1	YLR324W	PEX30	DNTAG0308	0.0281319	0.0828877	-0.0287844
1_DNTAG0309	1	YPR128C	ANT1	DNTAG0309	-0.0297016	0.0190005	-0.0801053
1_DNTAG0310	1	YDL065C	PEX19	DNTAG0310	0.183195	0.10202	0.260045
1_DNTAG0311	1	YDR244W	PEX5	DNTAG0311	0.0108666	-0.134312	0.142762
1_DNTAG0312	1	YDR142C	PEX7	DNTAG0312	-0.0790569	-0.100375	-0.0580492
1_DNTAG0313	1	YOL147C	PEX11	DNTAG0313	0.355678	0.388838	0.321739
1_DNTAG0314	1	YLR191W	PEX13	DNTAG0314	0.134517	0.0140007	0.245738
1_DNTAG0315	1	YOL044W	PEX15	DNTAG0315	0.143664	0.30847	-0.0424251
1_DNTAG0316	1	YDR329C	PEX3	DNTAG0316	0.0809383	0.0484098	0.11275
1_DNTAG0317	1	YGR077C	PEX8	DNTAG0317	0.412896	0.289423	0.526629
1_DNTAG0318	1	YGR133W	PEX4	DNTAG0318	0.153878	0.00929196	0.285284
1_DNTAG0319	1	YML121W	GTR1	DNTAG0319	-0.259782	-0.151485	-0.376873
1_DNTAG0321	1	YLR292C	SEC72	DNTAG0321	0.156589	0.112501	0.19937
1_DNTAG0322	1	YHR013C	ARD1	DNTAG0322	-0.951546	-1.20523	-0.73587
1_DNTAG0323	1	YDL040C	NAT1	DNTAG0323	-1.86875	-1.20287	-3.14291
1_DNTAG0325	1	YNR032W	PPG1	DNTAG0325	-0.196634	-0.192354	-0.200928
1_DNTAG0326	1	YGR123C	PPT1	DNTAG0326	-0.0726775	-0.211502	0.0539536
1_DNTAG0327	1	YDR477W	SNF1	DNTAG0327	0.31131	0.105497	0.491394
1_DNTAG0328	1	YDR490C	PKH1	DNTAG0328	0.12981	0.186073	0.0712644
1_DNTAG0329	1	YKL126W	YPK1	DNTAG0329	0.171635	0.079109	0.258583
1_DNTAG0330	1	YHR079C	IRE1	DNTAG0330	-0.0474419	0.0521685	-0.154443
1_DNTAG0334	1	YNL265C	IST1	DNTAG0334	0.133586	0.143255	0.123853
1_DNTAG0335	1	YGR105W	VMA21	DNTAG0335	-0.0165565	-0.0704479	0.0353941
1_DNTAG0338	1	YKL119C	VPH2	DNTAG0338	0.412193	0.537854	0.274533
1_DNTAG0339	1	YNR051C	BRE5	DNTAG0339	0.0352463	-0.143655	0.19439
1_DNTAG0340	1	YDL122W	UBP1	DNTAG0340	0.0226128	-0.0877567	0.125136
1_DNTAG0341	1	YLR216C	CPR6	DNTAG0341	-0.108231	-0.269964	0.0371854
1_DNTAG0342	1	YBR169C	SSE2	DNTAG0342	0.122388	-0.0986677	0.31403
1_DNTAG0343	1	YLL024C	SSA2	DNTAG0343	-0.0996024	-0.0338003	-0.16855
1_DNTAG0344	1	YDR518W	EUG1	DNTAG0344	0.186852	0.0922946	0.27559
1_DNTAG0346	1	YML078W	CPR3	DNTAG0346	0.00273435	-0.17981	0.164754
1_DNTAG0347	1	YOR288C	MPD1	DNTAG0347	0.147028	-0.107129	0.363045
1_DNTAG0349	1	YMR161W	HLJ1	DNTAG0349	0.0502029	0.0728012	0.027245
1_DNTAG0350	1	YJL073W	JEM1	DNTAG0350	0.00656762	0.101091	-0.0945854
1_DNTAG0351	1	YOR357C	SNX3	DNTAG0351	0.127506	0.144474	0.110335
1_DNTAG0352	1	YDR155C	CPR1	DNTAG0352	0.0158728	0.178196	-0.167057
1_DNTAG0353	1	YLR121C	YPS3	DNTAG0353	0.0935084	-0.0185039	0.197447
1_DNTAG0354	1	YKL010C	UFD4	DNTAG0354	0.035669	0.0612955	0.00957909
1_DNTAG0355	1	YER100W	UBC6	DNTAG0355	-0.0188936	0.0969498	-0.144857
1_DNTAG0356	1	YLR120C	YPS1	DNTAG0356	-0.0913794	-0.0523584	-0.131485
1_DNTAG0357	1	YMR274C	RCE1	DNTAG0357	0.0150729	-0.132934	0.149298
1_DNTAG0358	1	YLR250W	SSP120	DNTAG0358	0.180945	0.0932087	0.26365
1_DNTAG0359	1	YPR149W	NCE102	DNTAG0359	0.0380129	-0.0283019	0.101413
1_DNTAG0360	1	YBR162W-A	YSY6	DNTAG0360	-0.251138	-0.176653	-0.329679
1_DNTAG0362	1	YDR425W	SNX41	DNTAG0362	0.374596	0.374564	0.374628
1_DNTAG0363	1	YKL073W	LHS1	DNTAG0363	0.0123518	-0.0509437	0.0729866
1_DNTAG0364	1	YDR313C	PIB1	DNTAG0364	-0.162938	-1.35019	0.479405
1_DNTAG0365	1	YIL005W	EPS1	DNTAG0365	-0.156462	0.112386	-0.487156
1_DNTAG0366	1	YDR414C	ERD1	DNTAG0366	-0.113548	-0.211427	-0.0218889
1_DNTAG0367	1	YKL002W	DID4	DNTAG0367	0.0121871	0.0322864	-0.00819617
1_DNTAG0368	1	YPR173C	VPS4	DNTAG0368	0.0820248	0.145743	0.0153617
1_DNTAG0369	1	YNR006W	VPS27	DNTAG0369	-0.311887	-0.216078	-0.414514
1_DNTAG0370	1	YJL053W	PEP8	DNTAG0370	0.00656417	0.0727083	-0.0627588
1_DNTAG0371	1	YJL154C	VPS35	DNTAG0371	-0.283162	-0.352912	-0.216629
1_DNTAG0372	1	YOR069W	VPS5	DNTAG0372	0.191968	0.347182	0.0180188
1_DNTAG0374	1	YBL069W	AST1	DNTAG0374	-0.273	-0.088506	-0.484596
1_DNTAG0375	1	YLR246W	ERF2	DNTAG0375	-0.216382	-0.418353	-0.0392453
1_DNTAG0376	1	YOR297C	TIM18	DNTAG0376	-0.000880984	0.0134913	-0.0153979
1_DNTAG0377	1	YHR160C	PEX18	DNTAG0377	0.0534826	-0.450499	0.426258
1_DNTAG0378	1	YGR239C	PEX21	DNTAG0378	-0.102607	-0.0275351	-0.1818
1_DNTAG0379	1	YGL153W	PEX14	DNTAG0379	-0.0321963	-0.0624942	-0.00252163
1_DNTAG0380	1	YAL055W	PEX22	DNTAG0380	0.0156671	0.0589392	-0.0289432
1_DNTAG0381	1	YGR141W	VPS62	DNTAG0381	-0.026763	0.121644	-0.192205
1_DNTAG0382	1	YJR126C	VPS70	DNTAG0382	0.0878941	0.179653	-0.0100999
1_DNTAG0383	1	YMR004W	MVP1	DNTAG0383	0.0304696	0.139609	-0.0876065
1_DNTAG0384	1	YDR495C	VPS3	DNTAG0384	0.501858	0.584282	0.414438
1_DNTAG0385	1	YPR139C	LOA1	DNTAG0385	0.58232	0.0751109	0.95685
1_DNTAG0386	1	YOL082W	ATG19	DNTAG0386	0.00636551	0.00675358	0.00597733
1_DNTAG0388	1	YML097C	VPS9	DNTAG0388	-0.134564	-0.0162197	-0.263491
1_DNTAG0389	1	YOR359W	VTS1	DNTAG0389	-0.176641	-0.483726	0.0764128
1_DNTAG0390	1	YHL002W	HSE1	DNTAG0390	-0.00897887	-0.129244	0.102027
1_DNTAG0391	1	YGL104C	VPS73	DNTAG0391	0.138284	0.120706	0.155651
1_DNTAG0395	1	YBL078C	ATG8	DNTAG0395	-0.0282741	-0.177685	0.107105
1_DNTAG0397	1	YNR007C	ATG3	DNTAG0397	0.0296876	0.249072	-0.229146
1_DNTAG0398	1	YLR085C	ARP6	DNTAG0398	0.0500932	-0.0400388	0.134924
1_DNTAG0399	1	YHR171W	ATG7	DNTAG0399	0.119229	0.27083	-0.0501946
1_DNTAG0400	1	YDL149W	ATG9	DNTAG0400	0.103644	-0.114908	0.293403
1_DNTAG0401	1	YKR035W-A	DID2	DNTAG0401	-0.152803	-0.185549	-0.120784
1_DNTAG0402	1	YKR001C	VPS1	DNTAG0402	0.0954036	0.204864	-0.023049
1_DNTAG0403	1	YDR200C	VPS64	DNTAG0403	0.132055	0.261655	-0.0103468
1_DNTAG0404	1	YDR485C	VPS72	DNTAG0404	0.00630236	0.138164	-0.138834
1_DNTAG0405	1	YFR021W	ATG18	DNTAG0405	-0.0412354	-0.0136733	-0.0693344
1_DNTAG0406	1	YPL149W	ATG5	DNTAG0406	0.118529	0.146692	0.0898052
1_DNTAG0407	1	YGL124C	MON1	DNTAG0407	-0.326045	-0.116928	-0.570696
1_DNTAG0408	1	YNL297C	MON2	DNTAG0408	-0.0861283	-0.0684587	-0.104017
1_DNTAG0409	1	YBR290W	BSD2	DNTAG0409	0.129651	0.0849369	0.173021
1_DNTAG0410	1	YLR119W	SRN2	DNTAG0410	-0.108241	-0.0339138	-0.186606
1_DNTAG0411	1	YCL008C	STP22	DNTAG0411	0.202383	-0.088046	0.444029
1_DNTAG0412	1	YPL065W	VPS28	DNTAG0412	-0.100747	-0.0485062	-0.15495
1_DNTAG0413	1	YPL002C	SNF8	DNTAG0413	-0.46862	-0.443215	-0.494482
1_DNTAG0414	1	YJR102C	VPS25	DNTAG0414	-0.17343	-0.223078	-0.125434
1_DNTAG0415	1	YLR417W	VPS36	DNTAG0415	-0.197741	-0.0957696	-0.307472
1_DNTAG0416	1	YPR049C	ATG11	DNTAG0416	0.0475567	0.377969	-0.381734
1_DNTAG0417	1	YPR185W	ATG13	DNTAG0417	-0.0191735	-0.0826447	0.0416225
1_DNTAG0418	1	YNL242W	ATG2	DNTAG0418	0.0614144	0.0358027	0.0865793
1_DNTAG0420	1	YKR020W	VPS51	DNTAG0420	0.218116	0.432332	-0.0335489
1_DNTAG0421	1	YCL038C	ATG22	DNTAG0421	-0.00479939	-0.120789	0.102555
1_DNTAG0422	1	YEL027W	VMA3	DNTAG0422	0.084334	0.0251954	0.141144
1_DNTAG0423	1	YKR014C	YPT52	DNTAG0423	-0.0598753	-0.0559151	-0.0638465
1_DNTAG0424	1	YNL093W	YPT53	DNTAG0424	-0.0659979	-0.0290651	-0.103901
1_DNTAG0425	1	YDL113C	ATG20	DNTAG0425	0.272089	0.261494	0.282607
1_DNTAG0426	1	YBR217W	ATG12	DNTAG0426	-0.122584	-0.0328779	-0.218241
1_DNTAG0427	1	YPL120W	VPS30	DNTAG0427	-0.0158995	-0.00926333	-0.0225663
1_DNTAG0428	1	YBR131W	CCZ1	DNTAG0428	-0.127623	-0.1114	-0.14403
1_DNTAG0429	1	YNL223W	ATG4	DNTAG0429	0.127202	0.132143	0.122245
1_DNTAG0430	1	YOR089C	VPS21	DNTAG0430	-0.296317	0.0373344	-0.731109
1_DNTAG0431	1	YML041C	VPS71	DNTAG0431	0.00229072	-0.124062	0.118463
1_DNTAG0432	1	YBR164C	ARL1	DNTAG0432	-0.138073	-0.181764	-0.0956666
1_DNTAG0433	1	YPL045W	VPS16	DNTAG0433	-0.05759	-0.55588	0.312077
1_DNTAG0434	1	YEL013W	VAC8	DNTAG0434	-0.197596	-0.133658	-0.264499
1_DNTAG0435	1	YCL057W	PRD1	DNTAG0435	0.274764	0.222924	0.324806
1_DNTAG0437	1	YGR231C	PHB2	DNTAG0437	-0.0296336	-0.251	0.162241
1_DNTAG0438	1	YNL119W	NCS2	DNTAG0438	0.433104	0.650644	0.176835
1_DNTAG0439	1	YGR086C	PIL1	DNTAG0439	0.144372	-0.106994	0.358371
1_DNTAG0440	1	YDL100C	GET3	DNTAG0440	-0.0679397	-0.596709	0.318159
1_DNTAG0441	1	YJR032W	CPR7	DNTAG0441	0.011059	0.0932604	-0.0761105
1_DNTAG0443	1	YBL075C	SSA3	DNTAG0443	-0.175991	-0.0699876	-0.290405
1_DNTAG0445	1	YDR059C	UBC5	DNTAG0445	-0.00790986	-0.041955	0.0253503
1_DNTAG0446	1	YGR038W	ORM1	DNTAG0446	-0.0705962	-0.0366958	-0.105312
1_DNTAG0447	1	YLR350W	ORM2	DNTAG0447	0.145343	0.217673	0.0691935
1_DNTAG0448	1	YCR044C	PER1	DNTAG0448	-0.149312	0.103693	-0.456325
1_DNTAG0449	1	YOR132W	VPS17	DNTAG0449	0.0989602	0.205841	-0.0164772
1_DNTAG0451	1	YML048W	GSF2	DNTAG0451	-0.00260698	-0.17453	0.150993
1_DNTAG0452	1	YDL018C	ERP3	DNTAG0452	0.0104214	-0.00566661	0.0263319
1_DNTAG0453	1	YOR016C	ERP4	DNTAG0453	-0.00602081	-0.0766327	0.0612957
1_DNTAG0454	1	YHR110W	ERP5	DNTAG0454	-0.0814986	-0.0705786	-0.0925019
1_DNTAG0455	1	YPR095C	SYT1	DNTAG0455	0.0127365	0.0490986	-0.0245658
1_DNTAG0456	1	YGL002W	ERP6	DNTAG0456	0.0526458	0.123697	-0.0220862
1_DNTAG0457	1	YDR229W	IVY1	DNTAG0457	0.0662853	0.281877	-0.187282
1_DNTAG0458	1	YJL117W	PHO86	DNTAG0458	0.372113	0.00563509	0.664101
1_DNTAG0459	1	YGL167C	PMR1	DNTAG0459	-0.134952	-0.428146	0.108604
1_DNTAG0460	1	YJR010C-A	SPC1	DNTAG0460	-0.0665501	0.0343507	-0.175042
1_DNTAG0461	1	YML055W	SPC2	DNTAG0461	0.126759	0.105225	0.147976
1_DNTAG0462	1	YDL138W	RGT2	DNTAG0462	0.244643	0.112491	0.365699
1_DNTAG0463	1	YDL194W	SNF3	DNTAG0463	0.0175308	0.133987	-0.109158
1_DNTAG0464	1	YLR330W	CHS5	DNTAG0464	0.205437	0.173227	0.236944
1_DNTAG0465	1	YMR017W	SPO20	DNTAG0465	-0.00863375	-0.0148351	-0.00245896
1_DNTAG0466	1	YKR031C	SPO14	DNTAG0466	-0.34536	-0.16767	-0.548051
1_DNTAG0467	1	YNR049C	MSO1	DNTAG0467	-0.0810042	0.0959358	-0.282719
1_DNTAG0468	1	YPL154C	PEP4	DNTAG0468	-0.0752289	-0.035479	-0.116105
1_DNTAG0469	1	YEL060C	PRB1	DNTAG0469	0.0885655	0.133375	0.0423193
1_DNTAG0470	1	YOL031C	SIL1	DNTAG0470	0.0366515	0.250039	-0.213869
1_DNTAG0471	1	YER087C-B	SBH1	DNTAG0471	0.174288	0.353609	-0.0305273
1_DNTAG0472	1	YLR083C	EMP70	DNTAG0472	-0.374084	-0.326424	-0.423372
1_DNTAG0473	1	YLL043W	FPS1	DNTAG0473	0.141084	0.124592	0.15739
1_DNTAG0474	1	YPL084W	BRO1	DNTAG0474	-0.510563	-0.567488	-0.455799
1_DNTAG0475	1	YER143W	DDI1	DNTAG0475	0.173101	-0.0364779	0.356061
1_DNTAG0477	1	YMR054W	STV1	DNTAG0477	0.104394	-0.24758	0.387116
1_DNTAG0479	1	YPL234C	VMA11	DNTAG0479	-0.225356	-0.0818402	-0.384741
1_DNTAG0480	1	YPR036W	VMA13	DNTAG0480	-0.444722	-0.502462	-0.389203
1_DNTAG0481	1	YOR332W	VMA4	DNTAG0481	-0.317632	-0.15531	-0.500561
1_DNTAG0482	1	YKL080W	VMA5	DNTAG0482	-0.824165		-0.824165
1_DNTAG0483	1	YGR020C	VMA7	DNTAG0483	0.37339		0.37339
1_DNTAG0484	1	YEL051W	VMA8	DNTAG0484	-0.0555281	-0.198598	0.0746247
1_DNTAG0485	1	YJR033C	RAV1	DNTAG0485	0.312865	0.418147	0.199291
1_DNTAG0486	1	YHR039C-A	VMA10	DNTAG0486	-0.199994	0.205354	-0.765771
1_DNTAG0487	1	YDR456W	NHX1	DNTAG0487	-0.150076	0.000311143	-0.317984
1_DNTAG0488	1	YDR202C	RAV2	DNTAG0488	0.233728	0.00613973	0.430258
1_DNTAG0489	1	YDL185W	VMA1	DNTAG0489	0.193088	0.127386	0.255927
1_DNTAG0490	1	YLR447C	VMA6	DNTAG0490	-0.530973	-0.55591	-0.506458
1_DNTAG0491	1	YOR270C	VPH1	DNTAG0491	-0.147913	-0.0940078	-0.203911
1_DNTAG0493	1	YMR297W	PRC1	DNTAG0493	-0.0470078	0.144671	-0.268112
1_DNTAG0494	1	YLR373C	VID22	DNTAG0494	0.354552	0.347553	0.361517
1_DNTAG0495	1	YBR286W	APE3	DNTAG0495	-0.153275	-0.260056	-0.0538556
1_DNTAG0496	1	YKL103C	APE1	DNTAG0496	-0.064074	0.280594	-0.517827
1_DNTAG0497	1	YPR079W	MRL1	DNTAG0497	-0.096852	-0.0646773	-0.129761
1_DNTAG0498	1	YHR138C	YHR138C	DNTAG0498	0.0613201	0.0460346	0.0764453
1_DNTAG0499	1	YER072W	VTC1	DNTAG0499	-0.131047	-0.39332	0.0908014
1_DNTAG0500	1	YPL019C	VTC3	DNTAG0500	-0.178182	0.013505	-0.399297
1_DNTAG0502	1	YNL015W	PBI2	DNTAG0502	0.189345	0.0176828	0.342736
1_DNTAG0503	1	YFL004W	VTC2	DNTAG0503	-0.108165	0.0503505	-0.286272
1_DNTAG0504	1	YNL054W	VAC7	DNTAG0504	-0.187394	0.0423234	-0.460747
1_DNTAG0505	1	YLR386W	VAC14	DNTAG0505	0.208726	0.168178	0.248166
1_DNTAG0506	1	YDL077C	VAM6	DNTAG0506	-0.151527	-0.370083	0.0382335
1_DNTAG0508	1	YOL018C	TLG2	DNTAG0508	0.0906266	0.0386589	0.140787
1_DNTAG0509	1	YLR093C	NYV1	DNTAG0509	0.209239	0.177964	0.23985
1_DNTAG0510	1	YDR323C	PEP7	DNTAG0510	0.128228	0.115075	0.141263
1_DNTAG0513	1	YPL232W	SSO1	DNTAG0513	-0.00348255	-0.156074	0.134502
1_DNTAG0514	1	YOR106W	VAM3	DNTAG0514	0.140671	-0.0379844	0.29962
1_DNTAG0515	1	YGL212W	VAM7	DNTAG0515	0.0615886	-0.295706	0.347728
1_DNTAG0516	1	YAR031W	PRM9	DNTAG0516	0.0217746	-0.229716	0.235865
1_DNTAG0517	1	YJL178C	ATG27	DNTAG0517	-0.0985813	-0.0631798	-0.134873
1_DNTAG0518	1	YKL135C	APL2	DNTAG0518	0.269079	0.459918	0.0490924
1_DNTAG0520	1	YPL259C	APM1	DNTAG0520	-0.16456	-0.172123	-0.157037
1_DNTAG0521	1	YHL019C	APM2	DNTAG0521	0.141156	0.220173	0.0575591
1_DNTAG0522	1	YLR170C	APS1	DNTAG0522	0.0120919	0.171616	-0.16729
1_DNTAG0523	1	YJR005W	APL1	DNTAG0523	0.0213856	0.0708533	-0.0298386
1_DNTAG0524	1	YBL037W	APL3	DNTAG0524	-0.0756733	0.0921821	-0.265662
1_DNTAG0525	1	YJR058C	APS2	DNTAG0525	-0.211194	-0.130569	-0.296594
1_DNTAG0529	1	YLR309C	IMH1	DNTAG0529	0.28517	0.292899	0.2774
1_DNTAG0530	1	YPL249C	GYP5	DNTAG0530	-0.182383	-0.0268146	-0.356777
1_DNTAG0531	1	YPR028W	YOP1	DNTAG0531	0.0794193	-0.0511595	0.199154
1_DNTAG0533	1	YAL048C	GEM1	DNTAG0533	0.00332312	-0.244515	0.214762
1_DNTAG0535	1	YGL023C	PIB2	DNTAG0535	0.0537812	0.222324	-0.137089
1_DNTAG0536	1	YJR110W	YMR1	DNTAG0536	-0.221182	-0.29703	-0.149123
1_DNTAG0537	1	YPL145C	KES1	DNTAG0537	0.160776	0.244295	0.0721229
1_DNTAG0538	1	YCR034W	ELO2	DNTAG0538	0.0248041	-0.00206766	0.0511844
1_DNTAG0539	1	YBR105C	VID24	DNTAG0539	0.128471	0.185676	0.0689029
1_DNTAG0540	1	YER031C	YPT31	DNTAG0540	0.166961	0.176595	0.157262
1_DNTAG0541	1	YGL210W	YPT32	DNTAG0541	-0.0141625	0.101181	-0.139535
1_DNTAG0543	1	YKL176C	LST4	DNTAG0543	0.011732	0.119001	-0.104158
1_DNTAG0544	1	YGR057C	LST7	DNTAG0544	-0.14083	0.160979	-0.522949
1_DNTAG0577	1	YBL015W	ACH1	DNTAG0577	-0.0853158	-0.144537	-0.0284301
1_DNTAG0578	1	YGR268C	HUA1	DNTAG0578	-0.106962	-0.0471113	-0.169403
1_DNTAG0579	1	YOR284W	HUA2	DNTAG0579	-0.138974	-0.112846	-0.165583
1_DNTAG0580	1	YLR144C	ACF2	DNTAG0580	0.183967	0.165772	0.201936
1_DNTAG0581	1	YJR083C	ACF4	DNTAG0581	0.125926	0.248929	-0.00855109
1_DNTAG0582	1	YLR410W	VIP1	DNTAG0582	0.040763	-0.0373858	0.114895
1_DNTAG0583	1	YPR154W	PIN3	DNTAG0583	0.15413	-0.0355746	0.321763
1_DNTAG0584	1	YJL020C	BBC1	DNTAG0584	-0.0553437	-0.0528238	-0.057868
1_DNTAG0586	1	YNL047C	SLM2	DNTAG0586	-0.167949	-0.208911	-0.128118
1_DNTAG0587	1	YOR239W	ABP140	DNTAG0587	-0.0466347	0.0544015	-0.155283
1_DNTAG0589	1	YOR035C	SHE4	DNTAG0589	0.289106	-0.232654	0.671473
1_DNTAG0590	1	YBR059C	AKL1	DNTAG0590	-0.180242	-0.363045	-0.0180184
1_DNTAG0591	1	YJL100W	LSB6	DNTAG0591	0.0569426	0.120195	-0.00921061
1_DNTAG0593	1	YFR024C-A	LSB3	DNTAG0593	-0.100526	-0.0690944	-0.132657
1_DNTAG0594	1	YOL112W	MSB4	DNTAG0594	0.0863867	-0.0187019	0.184337
1_DNTAG0596	1	YNL079C	TPM1	DNTAG0596	0.00988833	0.122463	-0.11222
1_DNTAG0597	1	YIL138C	TPM2	DNTAG0597	-0.0019453	0.0764962	-0.0848983
1_DNTAG0598	1	YDR245W	MNN10	DNTAG0598	0.401239	-0.0325434	0.734298
1_DNTAG0599	1	YIL159W	BNR1	DNTAG0599	0.0784051	-0.0866635	0.226511
1_DNTAG0600	1	YLR319C	BUD6	DNTAG0600	0.0291686	-0.108113	0.154514
1_DNTAG0601	1	YER149C	PEA2	DNTAG0601	0.0768369	-0.0459156	0.189959
1_DNTAG0602	1	YNL271C	BNI1	DNTAG0602	0.21341	0.229657	0.196978
1_DNTAG0603	1	YLL021W	SPA2	DNTAG0603	0.094033	0.14491	0.0412966
1_DNTAG0604	1	YLR313C	SPH1	DNTAG0604	-0.175886	-0.221353	-0.131808
1_DNTAG0605	1	YKR055W	RHO4	DNTAG0605	-0.225042	-0.221541	-0.228551
1_DNTAG0606	1	YNL094W	APP1	DNTAG0606	-0.0568858	-0.172103	0.0498069
1_DNTAG0607	1	YHR114W	BZZ1	DNTAG0607	0.114072	0.0202364	0.202174
1_DNTAG0608	1	YNL084C	END3	DNTAG0608	0.27924	0.362357	0.19104
1_DNTAG0609	1	YLR429W	CRN1	DNTAG0609	0.186502	0.439213	-0.120078
1_DNTAG0610	1	YOR367W	SCP1	DNTAG0610	0.0565919	0.0227152	0.0896913
1_DNTAG0611	1	YDR129C	SAC6	DNTAG0611	1.13214	0.559966	1.54073
1_DNTAG0612	1	YDL135C	RDI1	DNTAG0612	-0.0491568	-0.00130039	-0.0986553
1_DNTAG0614	1	YDR379W	RGA2	DNTAG0614	0.288396	0.369315	0.202668
1_DNTAG0615	1	YLR370C	ARC18	DNTAG0615	0.204676	0.208233	0.201111
1_DNTAG0616	1	YJR084W	YJR084W	DNTAG0616	-0.457869	-0.848236	-0.150948
1_DNTAG0617	1	YDL216C	RRI1	DNTAG0617	0.276705	-0.166298	0.615155
1_DNTAG0618	1	YMR025W	CSI1	DNTAG0618	-0.133058	-0.0199267	-0.255821
1_DNTAG0619	1	YDR179C	CSN9	DNTAG0619	-0.0608816	0.00865154	-0.133936
1_DNTAG0620	1	YOL117W	RRI2	DNTAG0620	0.271177	0.142345	0.389441
1_DNTAG0621	1	YNR044W	AGA1	DNTAG0621	0.0111585	-0.063241	0.0819086
1_DNTAG0622	1	YGL032C	AGA2	DNTAG0622	-0.00905982	-0.0772209	0.0560257
1_DNTAG0623	1	YJR004C	SAG1	DNTAG0623	0.0139105	0.0270817	0.000617959
1_DNTAG0624	1	YLR423C	ATG17	DNTAG0624	0.105078	0.135906	0.0735773
1_DNTAG0625	1	YGL180W	ATG1	DNTAG0625	-0.00556886	0.0074402	-0.0186963
1_DNTAG0626	1	YBR210W	ERV15	DNTAG0626	-0.0164766	-0.00288002	-0.0302025
1_DNTAG0627	1	YKL007W	CAP1	DNTAG0627	0.181184	-0.0471458	0.378266
1_DNTAG0628	1	YIL034C	CAP2	DNTAG0628	0.0414932	-0.100878	0.171068
1_DNTAG0629	1	YDL049C	KNH1	DNTAG0629	0.183358	-0.093289	0.415396
1_DNTAG0630	1	YMR306W	FKS3	DNTAG0630	-0.208893	-0.2632	-0.156556
1_DNTAG0631	1	YMR215W	GAS3	DNTAG0631	-0.168735	-0.166586	-0.170887
1_DNTAG0632	1	YOL132W	GAS4	DNTAG0632	0.179293	0.0130861	0.328315
1_DNTAG0633	1	YOL030W	GAS5	DNTAG0633	-0.0356021	0.0903136	-0.173568
1_DNTAG0634	1	YLR343W	GAS2	DNTAG0634	0.0688761	-0.0740436	0.198905
1_DNTAG0635	1	YIR003W	AIM21	DNTAG0635	0.0895802	0.128661	0.0494116
1_DNTAG0636	1	YKR100C	SKG1	DNTAG0636	-0.164284	-0.10188	-0.229509
1_DNTAG0637	1	YNL087W	TCB2	DNTAG0637	0.0415528	0.0362959	0.0467906
1_DNTAG0638	1	YMR295C	YMR295C	DNTAG0638	0.133556	0.0105735	0.246873
1_DNTAG0639	1	YOR264W	DSE3	DNTAG0639	-0.138399	-0.348179	0.0447141
1_DNTAG0640	1	YDR348C	PAL1	DNTAG0640	-0.245425	-0.00530481	-0.533649
1_DNTAG0641	1	YPL158C	AIM44	DNTAG0641	-0.364658	-0.548086	-0.201943
1_DNTAG0642	1	YPL221W	FLC1	DNTAG0642	-0.146325	0.0661694	-0.395616
1_DNTAG0643	1	YHR149C	SKG6	DNTAG0643	0.12461	-0.0617383	0.289618
1_DNTAG0644	1	YCR030C	SYP1	DNTAG0644	0.21843	0.270652	0.164247
1_DNTAG0645	1	YLR037C	PAU23	DNTAG0645	0.160706	0.0244834	0.285168
1_DNTAG0646	1	YBR301W	PAU24	DNTAG0646	-0.0134606	-0.00219354	-0.0248163
1_DNTAG0647	1	YJR151C	DAN4	DNTAG0647	-0.0467264	-0.0266251	-0.0671117
1_DNTAG0648	1	YJL078C	PRY3	DNTAG0648	-0.0234458	-0.0922607	0.0422357
1_DNTAG0649	1	YDL037C	BSC1	DNTAG0649	-0.0919748	-0.0246248	-0.162624
1_DNTAG0650	1	YNR069C	BSC5	DNTAG0650	0.0318759	-0.217688	0.244569
1_DNTAG0651	1	YLR213C	CRR1	DNTAG0651	0.031346	-0.0867682	0.140518
1_DNTAG0652	1	YBR033W	EDS1	DNTAG0652	0.105041	0.314651	-0.140288
1_DNTAG0654	1	YLR099C	ICT1	DNTAG0654	0.105759	0.169348	0.0392376
1_DNTAG0656	1	YBL066C	SEF1	DNTAG0656	-0.00569067	0.0232078	-0.0351798
1_DNTAG0657	1	YFR022W	ROG3	DNTAG0657	-0.100478	-0.116183	-0.0849411
1_DNTAG0658	1	YGL015C	YGL015C	DNTAG0658	-0.111949	-0.0668445	-0.158508
1_DNTAG0659	1	YGL196W	DSD1	DNTAG0659	-0.189136	-0.268983	-0.113478
1_DNTAG0660	1	YJL046W	AIM22	DNTAG0660	0.0149743	0.0505546	-0.0215057
1_DNTAG0662	1	YKL037W	AIM26	DNTAG0662	0.178567	0.30904	0.0351101
1_DNTAG0663	1	YLR021W	IRC25	DNTAG0663	-0.0220334	-0.352421	0.246613
1_DNTAG0666	1	YOL003C	PFA4	DNTAG0666	0.11711	0.00626613	0.220042
1_DNTAG0667	1	YPL041C	MRX11	DNTAG0667	-0.0888846	-0.159815	-0.0212784
1_DNTAG0668	1	YPL077C	YPL077C	DNTAG0668	-0.0123968	0.0835993	-0.115239
1_DNTAG0669	1	YBR148W	YSW1	DNTAG0669	0.181411	0.204255	0.158199
1_DNTAG0670	1	YGL110C	CUE3	DNTAG0670	0.0509724	0.174447	-0.0840675
1_DNTAG0671	1	YOR042W	CUE5	DNTAG0671	0.0248939	-0.186636	0.209338
1_DNTAG0672	1	YAL053W	FLC2	DNTAG0672	-0.00460918	-0.0426105	0.0324168
1_DNTAG0673	1	YDR248C	YDR248C	DNTAG0673	0.111712	0.0578782	0.163609
1_DNTAG0674	1	YEL020C	YEL020C	DNTAG0674	0.116448	0.217239	0.00808299
1_DNTAG0675	1	YGR237C	YGR237C	DNTAG0675	-0.353163	-0.28036	-0.429836
1_DNTAG0676	1	YHR033W	YHR033W	DNTAG0676	0.100391	0.177464	0.0189681
1_DNTAG0677	1	YML131W	YML131W	DNTAG0677	-0.260078	-0.340558	-0.183851
1_DNTAG0678	1	YMR073C	IRC21	DNTAG0678	0.35009	0.342276	0.357862
1_DNTAG0679	1	YMR124W	EPO1	DNTAG0679	-0.0692434	-0.0450408	-0.093859
1_DNTAG0680	1	YNL040W	YNL040W	DNTAG0680	-0.108077	-0.111311	-0.10485
1_DNTAG0681	1	YJR055W	HIT1	DNTAG0681	0.209435	0.0633729	0.342059
1_DNTAG0682	1	YGR136W	LSB1	DNTAG0682	-0.161298	-0.229252	-0.0964017
1_DNTAG0683	1	YBR238C	YBR238C	DNTAG0683	-0.106451	-0.171742	-0.0439863
1_DNTAG0685	1	YLR414C	PUN1	DNTAG0685	0.0636142	0.0238951	0.102269
1_DNTAG0686	1	YOL070C	NBA1	DNTAG0686	-0.0659938	-0.0778972	-0.0541878
1_DNTAG0687	1	YOR304C-A	BIL1	DNTAG0687	-0.0855048	-0.166488	-0.00882661
1_DNTAG0688	1	YJL079C	PRY1	DNTAG0688	0.879038	-0.664012	1.60747
1_DNTAG0689	1	YDR185C	UPS3	DNTAG0689	0.0199881	0.0112783	0.0286457
1_DNTAG0690	1	YDR233C	RTN1	DNTAG0690	-0.117133	0.0793331	-0.344635
1_DNTAG0691	1	YBR054W	YRO2	DNTAG0691	-0.248119	-0.127842	-0.379342
1_DNTAG0692	1	YDR314C	RAD34	DNTAG0692	0.0730479	-0.0428532	0.180326
1_DNTAG0693	1	YPR045C	THP3	DNTAG0693	0.0215382	0.312692	-0.343625
1_DNTAG0694	1	YBL028C	YBL028C	DNTAG0694	-0.469351	-0.797987	-0.201862
1_DNTAG0695	1	YMR195W	ICY1	DNTAG0695	0.43109	0.0634625	0.723806
1_DNTAG0696	1	YKL161C	KDX1	DNTAG0696	0.00209596	-0.126514	0.120173
1_DNTAG0697	1	YML117W	NAB6	DNTAG0697	0.026523	-0.0231506	0.0745431
1_DNTAG0698	1	YIL110W	HPM1	DNTAG0698	-0.176393	0.00115474	-0.378898
1_DNTAG0699	1	YNL063W	MTQ1	DNTAG0699	-0.141398	-0.130136	-0.152747
1_DNTAG0700	1	YDL178W	DLD2	DNTAG0700	0.0693182	-0.084783	0.208536
1_DNTAG0701	1	YGR080W	TWF1	DNTAG0701	-0.187996	-0.14361	-0.233791
1_DNTAG0702	1	YGR152C	RSR1	DNTAG0702	0.102612	0.174526	0.0269231
1_DNTAG0703	1	YKL092C	BUD2	DNTAG0703	-0.0865967	-0.0811508	-0.0920633
1_DNTAG0704	1	YGR041W	BUD9	DNTAG0704	0.0988263	0.13172	0.0651654
1_DNTAG0705	1	YEL029C	BUD16	DNTAG0705	-0.0201026	0.101054	-0.152374
1_DNTAG0706	1	YFL023W	BUD27	DNTAG0706	0.905053	0.769677	1.02881
1_DNTAG0707	1	YNR027W	BUD17	DNTAG0707	-0.118316	0.0694111	-0.334177
1_DNTAG0708	1	YOR301W	RAX1	DNTAG0708	0.0806564	0.15514	0.00211674
1_DNTAG0709	1	YLR084C	RAX2	DNTAG0709	0.169866	-0.0032465	0.324413
1_DNTAG0710	1	YGL174W	BUD13	DNTAG0710	0.484106	0.48027	0.487931
1_DNTAG0712	1	YMR014W	BUD22	DNTAG0712	-0.0055285	0.143759	-0.172066
1_DNTAG0714	1	YJR092W	BUD4	DNTAG0714	-0.215242	-0.330834	-0.108229
1_DNTAG0715	1	YPR122W	AXL1	DNTAG0715	-0.200665	-0.262142	-0.141701
1_DNTAG0716	1	YIL140W	AXL2	DNTAG0716	0.0645236	0.176098	-0.0564086
1_DNTAG0717	1	YCR063W	BUD31	DNTAG0717	0.0540572	0.240703	-0.160374
1_DNTAG0718	1	YGR221C	TOS2	DNTAG0718	0.118459	0.0414951	0.191525
1_DNTAG0720	1	YKL159C	RCN1	DNTAG0720	0.123434	0.177123	0.0676701
1_DNTAG0721	1	YGL248W	PDE1	DNTAG0721	0.0580214	0.126074	-0.0134008
1_DNTAG0722	1	YOR360C	PDE2	DNTAG0722	0.0686833	0.15608	-0.0243514
1_DNTAG0723	1	YNL127W	FAR11	DNTAG0723	-0.0459999	-0.111072	0.0162638
1_DNTAG0724	1	YFR008W	FAR7	DNTAG0724	0.933033	0.297118	1.37289
1_DNTAG0725	1	YMR029C	FAR8	DNTAG0725	0.0430261	0.30347	-0.275024
1_DNTAG0726	1	YLR238W	FAR10	DNTAG0726	-0.14721	0.03203	-0.351919
1_DNTAG0727	1	YML057W	CMP2	DNTAG0727	-0.0177939	-0.185906	0.132757
1_DNTAG0728	1	YBR229C	ROT2	DNTAG0728	0.148101	0.0139065	0.270869
1_DNTAG0729	1	YKL046C	DCW1	DNTAG0729	-0.103532	0.0568495	-0.284
1_DNTAG0730	1	YEL004W	YEA4	DNTAG0730	-0.0656295	-0.0901721	-0.0414974
1_DNTAG0731	1	YBL006C	LDB7	DNTAG0731	-0.510239	-0.282372	-0.780973
1_DNTAG0733	1	YLR020C	YEH2	DNTAG0733	0.0473166	0.0319286	0.0625422
1_DNTAG0734	1	YJR075W	HOC1	DNTAG0734	-0.0267859	-0.00764318	-0.0461861
1_DNTAG0735	1	YMR307W	GAS1	DNTAG0735	0.144065	-0.062504	0.324728
1_DNTAG0736	1	YGR282C	BGL2	DNTAG0736	0.0516348	-0.183795	0.253981
1_DNTAG0737	1	YDR261C	EXG2	DNTAG0737	0.0841214	-0.0921393	0.241173
1_DNTAG0738	1	YGL027C	CWH41	DNTAG0738	0.10492	-0.180537	0.343118
1_DNTAG0739	1	YER124C	DSE1	DNTAG0739	0.153241	0.0672355	0.234407
1_DNTAG0740	1	YDR055W	PST1	DNTAG0740	-0.0465901	-0.106522	0.0109512
1_DNTAG0741	1	YEL040W	UTR2	DNTAG0741	-0.0442361	0.0432677	-0.137392
1_DNTAG0742	1	YHR021W-A	ECM12	DNTAG0742	-0.304042	-0.212065	-0.402285
1_DNTAG0743	1	YBL043W	ECM13	DNTAG0743	0.221206	0.2627	0.178483
1_DNTAG0744	1	YLR390W	ECM19	DNTAG0744	0.00228653	0.032022	-0.0280747
1_DNTAG0745	1	YJR106W	ECM27	DNTAG0745	-0.085561	0.115999	-0.319926
1_DNTAG0746	1	YHL043W	ECM34	DNTAG0746	0.136342	0.160757	0.111506
1_DNTAG0747	1	YIL146C	ATG32	DNTAG0747	0.151006	-0.001207	0.288681
1_DNTAG0748	1	YJL201W	ECM25	DNTAG0748	-0.151795	0.00553296	-0.328404
1_DNTAG0750	1	YDR528W	HLR1	DNTAG0750	0.143922	0.10142	0.185208
1_DNTAG0751	1	YHR103W	SBE22	DNTAG0751	0.221808	0.042468	0.381299
1_DNTAG0752	1	YBL001C	ECM15	DNTAG0752	-0.0205224	0.0355044	-0.0788133
1_DNTAG0753	1	YDR351W	SBE2	DNTAG0753	-0.0957368	-0.0532775	-0.139484
1_DNTAG0754	1	YBR005W	RCR1	DNTAG0754	-0.0450915	0.0388441	-0.134214
1_DNTAG0755	1	YLR443W	ECM7	DNTAG0755	-0.360768	-0.186771	-0.558665
1_DNTAG0756	1	YGR023W	MTL1	DNTAG0756	-0.267032	-0.198118	-0.339403
1_DNTAG0758	1	YBR078W	ECM33	DNTAG0758	0.0513489	0.0831296	0.0188523
1_DNTAG0759	1	YDR446W	ECM11	DNTAG0759	0.0778204	0.0974722	0.0578971
1_DNTAG0760	1	YHR132C	ECM14	DNTAG0760	0.154622	-0.00153027	0.295512
1_DNTAG0761	1	YDR293C	SSD1	DNTAG0761	-0.0492796	0.0545382	-0.161152
1_DNTAG0762	1	YKL096W	CWP1	DNTAG0762	-0.141798	-0.0832157	-0.20286
1_DNTAG0763	1	YJL159W	HSP150	DNTAG0763	0.0584399	0.0422253	0.0744742
1_DNTAG0764	1	YNL322C	KRE1	DNTAG0764	-0.0488744	-0.032718	-0.0652137
1_DNTAG0765	1	YKL163W	PIR3	DNTAG0765	-0.139573	-0.1395	-0.139646
1_DNTAG0766	1	YDR077W	SED1	DNTAG0766	-0.180362	-0.150911	-0.210428
1_DNTAG0767	1	YJL158C	CIS3	DNTAG0767	-0.0261511	-0.0393455	-0.0130763
1_DNTAG0768	1	YLR390W-A	CCW14	DNTAG0768	-0.109769	-0.142475	-0.0777876
1_DNTAG0769	1	YBR067C	TIP1	DNTAG0769	-0.145067	-0.10587	-0.185359
1_DNTAG0770	1	YGR032W	GSC2	DNTAG0770	0.0335195	0.302194	-0.29691
1_DNTAG0771	1	YLR342W	FKS1	DNTAG0771	-0.108011	-0.191134	-0.0294178
1_DNTAG0772	1	YLR433C	CNA1	DNTAG0772	-0.0997963	-0.0361425	-0.166389
1_DNTAG0773	1	YKL190W	CNB1	DNTAG0773	-0.0892781	-0.154318	-0.0270442
1_DNTAG0774	1	YLR300W	EXG1	DNTAG0774	-0.132667	0.0061791	-0.286312
1_DNTAG0775	1	YHR143W	DSE2	DNTAG0775	-0.559382	-0.643875	-0.479565
1_DNTAG0776	1	YGR143W	SKN1	DNTAG0776	0.0250278	0.0593658	-0.0101474
1_DNTAG0777	1	YPR159W	KRE6	DNTAG0777	-0.143068	-0.150961	-0.135219
1_DNTAG0778	1	YNL090W	RHO2	DNTAG0778	-0.247475	-0.0753999	-0.442889
1_DNTAG0780	1	YPL053C	KTR6	DNTAG0780	0.159394	0.183374	0.135008
1_DNTAG0781	1	YNL029C	KTR5	DNTAG0781	-0.0408031	0.0291669	-0.11434
1_DNTAG0782	1	YIL085C	KTR7	DNTAG0782	-0.220952	-0.191242	-0.251288
1_DNTAG0783	1	YBR205W	KTR3	DNTAG0783	-0.0649981	-0.112103	-0.0193826
1_DNTAG0784	1	YHR030C	SLT2	DNTAG0784	-0.0819759	0.0299864	-0.203364
1_DNTAG0785	1	YCR017C	CWH43	DNTAG0785	-0.178848	-0.0933623	-0.26972
1_DNTAG0786	1	YLR110C	CCW12	DNTAG0786	-0.177522	-0.416851	0.0276954
1_DNTAG0787	1	YOL109W	ZEO1	DNTAG0787	-0.0368854	-0.0671953	-0.0071993
1_DNTAG0788	1	YGR229C	SMI1	DNTAG0788	0.0477443	0.104342	-0.0111644
1_DNTAG0789	1	YDR420W	HKR1	DNTAG0789	0.0674883	0.212713	-0.0940078
1_DNTAG0790	1	YCL048W	SPS22	DNTAG0790	0.0135363	-0.0210763	0.047338
1_DNTAG0791	1	YGL178W	MPT5	DNTAG0791	0.215874	-0.1352	0.498017
1_DNTAG0793	1	YBL007C	SLA1	DNTAG0793	0.603199	0.43025	0.757618
1_DNTAG0795	1	YLR425W	TUS1	DNTAG0795	-0.0234936	0.00985878	-0.0576354
1_DNTAG0796	1	YLR371W	ROM2	DNTAG0796	-0.247239	-0.0556686	-0.468199
1_DNTAG0797	1	YGR070W	ROM1	DNTAG0797	0.0218799	0.0201901	0.0235677
1_DNTAG0798	1	YER155C	BEM2	DNTAG0798	0.841599	0.268597	1.25062
1_DNTAG0799	1	YKL096W-A	CWP2	DNTAG0799	0.181237	0.101227	0.257043
1_DNTAG0800	1	YKL164C	PIR1	DNTAG0800	-0.121336	-0.0573372	-0.188305
1_DNTAG0801	1	YGR059W	SPR3	DNTAG0801	0.0130523	-0.0694427	0.0910842
1_DNTAG0802	1	YDR218C	SPR28	DNTAG0802	0.0361536	-0.127889	0.183434
1_DNTAG0803	1	YJR137C	MET5	DNTAG0803	-0.142183	-0.050202	-0.240429
1_DNTAG0804	1	YCL051W	LRE1	DNTAG0804	0.120346	0.0430348	0.193724
1_DNTAG0805	1	YNL283C	WSC2	DNTAG0805	0.343279	0.212452	0.463223
1_DNTAG0806	1	YHL028W	WSC4	DNTAG0806	0.0617378	-0.0973708	0.205029
1_DNTAG0807	1	YLR332W	MID2	DNTAG0807	-0.0394786	-0.14037	0.0548164
1_DNTAG0808	1	YOL105C	WSC3	DNTAG0808	0.0242489	-0.117203	0.153062
1_DNTAG0809	1	YOR008C	SLG1	DNTAG0809	-0.102024	-0.493828	0.205781
1_DNTAG0811	1	YDL223C	HBT1	DNTAG0811	0.0270037	0.24582	-0.231039
1_DNTAG0812	1	YNL325C	FIG4	DNTAG0812	-0.195785	-0.00290749	-0.418487
1_DNTAG0813	1	YCR089W	FIG2	DNTAG0813	-0.28258	-0.254896	-0.310806
1_DNTAG0814	1	YBR040W	FIG1	DNTAG0814	0.104613	0.227443	-0.0296571
1_DNTAG0815	1	YNR032C-A	HUB1	DNTAG0815	-0.13063	-0.173197	-0.0892834
1_DNTAG0816	1	YAR014C	BUD14	DNTAG0816	-0.202701	-0.307235	-0.105233
1_DNTAG0817	1	YHR158C	KEL1	DNTAG0817	0.0877069	0.178919	-0.00966376
1_DNTAG0818	1	YNL233W	BNI4	DNTAG0818	-0.413034	-0.286625	-0.551591
1_DNTAG0819	1	YMR022W	UBC7	DNTAG0819	0.095222	0.262807	-0.0944196
1_DNTAG0820	1	YGR279C	SCW4	DNTAG0820	-0.00186537	0.0267252	-0.0310341
1_DNTAG0821	1	YMR305C	SCW10	DNTAG0821	0.0559583	0.0381475	0.0735519
1_DNTAG0822	1	YGR238C	KEL2	DNTAG0822	-0.0427597	0.0115971	-0.099245
1_DNTAG0823	1	YBR129C	OPY1	DNTAG0823	0.0640624	-0.0795361	0.194653
1_DNTAG0824	1	YJL108C	PRM10	DNTAG0824	-0.231858	-0.206094	-0.258089
1_DNTAG0825	1	YIL037C	PRM2	DNTAG0825	0.0637674	0.0500021	0.0774025
1_DNTAG0826	1	YPL156C	PRM4	DNTAG0826	-0.0375907	-0.0821389	0.00562299
1_DNTAG0827	1	YIL117C	PRM5	DNTAG0827	-0.160492	-0.102155	-0.221287
1_DNTAG0828	1	YML047C	PRM6	DNTAG0828	-0.0766485	0.0994337	-0.277249
1_DNTAG0830	1	YJL170C	ASG7	DNTAG0830	0.143186	0.342295	-0.08787
1_DNTAG0831	1	YCL027W	FUS1	DNTAG0831	-0.203139	0.0517049	-0.512868
1_DNTAG0832	1	YKL032C	IXR1	DNTAG0832	0.253411	0.301065	0.204129
1_DNTAG0833	1	YOR067C	ALG8	DNTAG0833	0.0560041	-0.14787	0.234603
1_DNTAG0834	1	YMR015C	ERG5	DNTAG0834	-0.0954643	0.0976717	-0.318512
1_DNTAG0835	1	YLR056W	ERG3	DNTAG0835	0.0540106	-0.0475119	0.148856
1_DNTAG0838	1	YGL012W	ERG4	DNTAG0838	-0.143515	-0.310687	0.00628223
1_DNTAG0839	1	YML075C	HMG1	DNTAG0839	0.0481479	0.226482	-0.155382
1_DNTAG0840	1	YLR450W	HMG2	DNTAG0840	-0.0461685	-0.122328	0.0261709
1_DNTAG0841	1	YER044C	ERG28	DNTAG0841	0.30673	-0.0281528	0.578337
1_DNTAG0842	1	YML008C	ERG6	DNTAG0842	-0.37686	-0.178452	-0.606972
1_DNTAG0843	1	YOR188W	MSB1	DNTAG0843	0.243531	0.139788	0.340312
1_DNTAG0844	1	YPL161C	BEM4	DNTAG0844	0.443229	0.184296	0.662685
1_DNTAG0845	1	YML109W	ZDS2	DNTAG0845	-0.291235	-0.388855	-0.199804
1_DNTAG0846	1	YGR014W	MSB2	DNTAG0846	-0.0953372	0.117117	-0.344573
1_DNTAG0847	1	YBL085W	BOI1	DNTAG0847	-0.247252	-0.566283	0.0138473
1_DNTAG0848	1	YER114C	BOI2	DNTAG0848	0.145925	0.07609	0.212536
1_DNTAG0849	1	YBR200W	BEM1	DNTAG0849	-0.44584	-0.229936	-0.699839
1_DNTAG0850	1	YCR088W	ABP1	DNTAG0850	0.0587406	-0.0262975	0.139044
1_DNTAG0851	1	YMR273C	ZDS1	DNTAG0851	0.0428292	0.070678	0.0144322
1_DNTAG0852	1	YPL115C	BEM3	DNTAG0852	-0.0942788	-0.0482763	-0.141797
1_DNTAG0853	1	YHR061C	GIC1	DNTAG0853	0.0232825	-0.133804	0.164932
1_DNTAG0854	1	YDR309C	GIC2	DNTAG0854	0.0798829	0.176088	-0.0231989
1_DNTAG0856	1	YAR050W	FLO1	DNTAG0856	-0.101379	0.0155828	-0.228665
1_DNTAG0857	1	YKR102W	FLO10	DNTAG0857	-0.0661811	-0.0945754	-0.0383349
1_DNTAG0858	1	YHR211W	FLO5	DNTAG0858	-0.0643807	-0.0241604	-0.105755
1_DNTAG0859	1	YAL063C	FLO9	DNTAG0859	0.0736842	0.144663	-0.000967612
1_DNTAG0860	1	YLR299W	ECM38	DNTAG0860	-0.0797483	0.0260858	-0.193965
1_DNTAG0861	1	YPL180W	TCO89	DNTAG0861	0.0524443	-0.0193614	0.120845
1_DNTAG0862	1	YJL062W	LAS21	DNTAG0862	0.00539999	0.012785	-0.00202305
1_DNTAG0863	1	YOR107W	RGS2	DNTAG0863	-0.109544	-0.101817	-0.117313
1_DNTAG0864	1	YKL130C	SHE2	DNTAG0864	0.0728642	-0.164535	0.276663
1_DNTAG0865	1	YAL029C	MYO4	DNTAG0865	-0.16021	-0.151154	-0.169323
1_DNTAG0866	1	YBR130C	SHE3	DNTAG0866	0.069223	0.100529	0.0372223
1_DNTAG0867	1	YML006C	GIS4	DNTAG0867	0.190953	0.406936	-0.0631555
1_DNTAG0868	1	YLR094C	GIS3	DNTAG0868	-0.157799	-0.0262267	-0.302586
1_DNTAG0870	1	YPL049C	DIG1	DNTAG0870	-0.0665464	-0.207304	0.0616905
1_DNTAG0871	1	YDR480W	DIG2	DNTAG0871	0.06473	0.00424514	0.122781
1_DNTAG0872	1	YGR040W	KSS1	DNTAG0872	0.0342265	0.0964951	-0.0308516
1_DNTAG0873	1	YBR095C	RXT2	DNTAG0873	0.719886	0.552239	0.870064
1_DNTAG0874	1	YOR080W	DIA2	DNTAG0874	-0.185664	-0.0852384	-0.293607
1_DNTAG0875	1	YPL192C	PRM3	DNTAG0875	0.0374061	-0.0309985	0.102714
1_DNTAG0876	1	YMR065W	KAR5	DNTAG0876	0.0329213	-0.0824113	0.139712
1_DNTAG0877	1	YMR313C	TGL3	DNTAG0877	-0.0264454	0.0641469	-0.12311
1_DNTAG0879	1	YKL116C	PRR1	DNTAG0879	-0.0777928	-0.0554998	-0.100436
1_DNTAG0881	1	YIL113W	SDP1	DNTAG0881	0.0281664	0.0184216	0.0378458
1_DNTAG0882	1	YDR466W	PKH3	DNTAG0882	0.043552	0.156538	-0.0790401
1_DNTAG0883	1	YDL227C	HO	DNTAG0883	-0.538562	-0.146034	-1.07953
1_DNTAG0884	1	YMR275C	BUL1	DNTAG0884	-0.103805	-0.0510506	-0.158562
1_DNTAG0886	1	YOR320C	GNT1	DNTAG0886	-0.0632444	-0.20055	0.0621217
1_DNTAG0887	1	YGL226C-A	OST5	DNTAG0887	-0.215893	-0.316448	-0.121892
1_DNTAG0888	1	YPL227C	ALG5	DNTAG0888	0.0157427	0.281281	-0.309949
1_DNTAG0889	1	YJR131W	MNS1	DNTAG0889	-0.156268	-0.21626	-0.0986716
1_DNTAG0890	1	YBR199W	KTR4	DNTAG0890	-0.0497593	-0.00201628	-0.0991366
1_DNTAG0891	1	YEL036C	ANP1	DNTAG0891	-0.00776198	-0.00478538	-0.0107447
1_DNTAG0893	1	YML115C	VAN1	DNTAG0893	0.155528	-0.189738	0.433915
1_DNTAG0895	1	YGR227W	DIE2	DNTAG0895	0.0524291	-0.152045	0.231488
1_DNTAG0896	1	YKR061W	KTR2	DNTAG0896	-0.205016	-0.177209	-0.233369
1_DNTAG0897	1	YJL139C	YUR1	DNTAG0897	0.118696	-0.084903	0.297084
1_DNTAG0898	1	YGR036C	CAX4	DNTAG0898	0.329285	0.611119	-0.0213097
1_DNTAG0899	1	YGL257C	MNT2	DNTAG0899	-0.00941366	-0.0656808	0.0447411
1_DNTAG0900	1	YIL014W	MNT3	DNTAG0900	-0.00533293	0.217039	-0.268339
1_DNTAG0901	1	YNR059W	MNT4	DNTAG0901	0.0526522	0.0410768	0.0641354
1_DNTAG0902	1	YAL023C	PMT2	DNTAG0902	-0.0238516	0.033211	-0.0832644
1_DNTAG0903	1	YOR321W	PMT3	DNTAG0903	0.373892	0.315416	0.430089
1_DNTAG0904	1	YJR143C	PMT4	DNTAG0904	-0.0591505	0.122406	-0.266889
1_DNTAG0905	1	YDL093W	PMT5	DNTAG0905	0.0347788	0.0257536	0.0437478
1_DNTAG0906	1	YGR199W	PMT6	DNTAG0906	-0.0480323	-0.168744	0.0633544
1_DNTAG0907	1	YDL095W	PMT1	DNTAG0907	0.344071	0.254254	0.428622
1_DNTAG0908	1	YDR483W	KRE2	DNTAG0908	0.00417773	0.0218928	-0.0137576
1_DNTAG0909	1	YOR099W	KTR1	DNTAG0909	-0.256853	-0.135611	-0.389227
1_DNTAG0910	1	YER001W	MNN1	DNTAG0910	0.218063	0.39391	0.0177683
1_DNTAG0911	1	YBR260C	RGD1	DNTAG0911	0.146066	-0.0910806	0.349679
1_DNTAG0912	1	YLR006C	SSK1	DNTAG0912	-0.0995901	-0.287703	0.0668
1_DNTAG0913	1	YOR219C	STE13	DNTAG0913	0.078968	0.0803969	0.0775378
1_DNTAG0914	1	YJR117W	STE24	DNTAG0914	0.0636634	-0.0532661	0.171822
1_DNTAG0916	1	YLR133W	CKI1	DNTAG0916	-0.243884	-0.0691879	-0.442687
1_DNTAG0917	1	YNL130C	CPT1	DNTAG0917	-0.144699	-0.460128	0.113987
1_DNTAG0918	1	YGR157W	CHO2	DNTAG0918	0.348402	0.272961	0.420092
1_DNTAG0919	1	YJR073C	OPI3	DNTAG0919	0.206961	0.0479661	0.350161
1_DNTAG0920	1	YNL169C	PSD1	DNTAG0920	0.0804463	0.0307597	0.128478
1_DNTAG0921	1	YGR202C	PCT1	DNTAG0921	-0.0839177	0.0742089	-0.261534
1_DNTAG0923	1	YOL011W	PLB3	DNTAG0923	0.00753496	0.099551	-0.0907521
1_DNTAG0924	1	YBR042C	CST26	DNTAG0924	-0.191479	-0.128462	-0.257375
1_DNTAG0926	1	YBL011W	SCT1	DNTAG0926	-0.238846	-0.496901	-0.0200203
1_DNTAG0927	1	YPR140W	TAZ1	DNTAG0927	-0.102821	-0.000573257	-0.212873
1_DNTAG0928	1	YGL126W	SCS3	DNTAG0928	0.0826615		0.0826615
1_DNTAG0929	1	YBR030W	RKM3	DNTAG0929	0.0127678	0.128223	-0.112737
1_DNTAG0930	1	YDR503C	LPP1	DNTAG0930	0.0414943	0.199184	-0.135571
1_DNTAG0931	1	YNL279W	PRM1	DNTAG0931	-0.153847	-0.180419	-0.127756
1_DNTAG0932	1	YMR232W	FUS2	DNTAG0932	0.32367	0.238609	0.403995
1_DNTAG0933	1	YNL053W	MSG5	DNTAG0933	0.0387772	0.265441	-0.230259
1_DNTAG0934	1	YDR075W	PPH3	DNTAG0934	0.0819199	0.259932	-0.12119
1_DNTAG0935	1	YDL006W	PTC1	DNTAG0935	0.211371	0.291111	0.126965
1_DNTAG0936	1	YBL056W	PTC3	DNTAG0936	-0.103064	-0.137072	-0.0698381
1_DNTAG0937	1	YER075C	PTP3	DNTAG0937	-0.118627		-0.118627
1_DNTAG0939	1	YNL048W	ALG11	DNTAG0939	0.107689	0.101692	0.11366
1_DNTAG0940	1	YBR015C	MNN2	DNTAG0940	-0.0658873	-0.116525	-0.0169665
1_DNTAG0941	1	YJL186W	MNN5	DNTAG0941	-0.128699	-0.119592	-0.137863
1_DNTAG0943	1	YEL042W	GDA1	DNTAG0943	0.0070255	-0.197382	0.186033
1_DNTAG0944	1	YER005W	YND1	DNTAG0944	-0.0403063	-0.105851	0.0223894
1_DNTAG0945	1	YMR101C	SRT1	DNTAG0945	0.301736	0.17523	0.418037
1_DNTAG0946	1	YBL082C	ALG3	DNTAG0946	-0.064091	-0.0288249	-0.100241
1_DNTAG0947	1	YNR030W	ALG12	DNTAG0947	0.265935	0.235609	0.295637
1_DNTAG0948	1	YEL031W	SPF1	DNTAG0948	0.103128	0.0676936	0.137714
1_DNTAG0949	1	YNL219C	ALG9	DNTAG0949	-0.0182842	-0.0455915	0.00851585
1_DNTAG0950	1	YOR002W	ALG6	DNTAG0950	0.184373	0.0412823	0.314543
1_DNTAG0951	1	YHR082C	KSP1	DNTAG0951	-0.0687287	-0.0734847	-0.0639884
1_DNTAG0952	1	YER027C	GAL83	DNTAG0952	0.0179399	-0.0173754	0.0524114
1_DNTAG0953	1	YOL016C	CMK2	DNTAG0953	0.042102	0.0378041	0.0463871
1_DNTAG0954	1	YFR014C	CMK1	DNTAG0954	0.239877	0.203637	0.275229
1_DNTAG0955	1	YHR135C	YCK1	DNTAG0955	0.0139933	0.0682775	-0.0424136
1_DNTAG0956	1	YNL154C	YCK2	DNTAG0956	-0.0826486	0.0127417	-0.184795
1_DNTAG0957	1	YNL307C	MCK1	DNTAG0957	-0.153966	-0.202558	-0.106958
1_DNTAG0958	1	YBL016W	FUS3	DNTAG0958	-0.645354	-0.447186	-0.875143
1_DNTAG0959	1	YLR113W	HOG1	DNTAG0959	0.0889531	0.0964008	0.0814668
1_DNTAG0960	1	YPR054W	SMK1	DNTAG0960	0.055012	0.0853818	0.0239891
1_DNTAG0961	1	YOR231W	MKK1	DNTAG0961	-0.0212748	-0.023541	-0.0190122
1_DNTAG0963	1	YPL140C	MKK2	DNTAG0963	-0.207792	-0.0410714	-0.396328
1_DNTAG0964	1	YCR073C	SSK22	DNTAG0964	-0.0531266	0.0864309	-0.207644
1_DNTAG0966	1	YNR031C	SSK2	DNTAG0966	-0.107005		-0.107005
1_DNTAG0967	1	YJL095W	BCK1	DNTAG0967	0.163055	0.129188	0.196146
1_DNTAG0969	1	YNL298W	CLA4	DNTAG0969	0.0272221	0.0209241	0.0334928
1_DNTAG0970	1	YNL020C	ARK1	DNTAG0970	0.130337	0.00180474	0.248349
1_DNTAG0971	1	YOL113W	SKM1	DNTAG0971	-0.0758605	0.037551	-0.198954
1_DNTAG0972	1	YGR262C	BUD32	DNTAG0972	0.0671319	-0.0493931	0.174945
1_DNTAG0973	1	YDR523C	SPS1	DNTAG0973	0.0208717	0.118477	-0.0838196
1_DNTAG0975	1	YJL164C	TPK1	DNTAG0975	-0.18013	-0.0641277	-0.306283
1_DNTAG0976	1	YPL203W	TPK2	DNTAG0976	0.476324	0.442224	0.509637
1_DNTAG0977	1	YKL166C	TPK3	DNTAG0977	-0.10605	-0.0555053	-0.15843
1_DNTAG0979	1	YIL015W	BAR1	DNTAG0979	-0.072579	-0.107416	-0.0385631
1_DNTAG0980	1	YOR003W	YSP3	DNTAG0980	0.00339641	0.231463	-0.26762
1_DNTAG0981	1	YHL030W	ECM29	DNTAG0981	-0.126191	-0.181645	-0.0727889
1_DNTAG0982	1	YHR184W	SSP1	DNTAG0982	0.125498	0.358115	-0.151975
1_DNTAG0983	1	YDL239C	ADY3	DNTAG0983	-0.314071	-0.233756	-0.399121
1_DNTAG0984	1	YOR124C	UBP2	DNTAG0984	-0.137706	-0.0792708	-0.198608
1_DNTAG0985	1	YER151C	UBP3	DNTAG0985	-0.356424	-0.449346	-0.269127
1_DNTAG0986	1	YKL117W	SBA1	DNTAG0986	-0.0252459	0.228257	-0.332994
1_DNTAG0987	1	YPL106C	SSE1	DNTAG0987	-0.197194	-0.302496	-0.0990583
1_DNTAG0988	1	YMR214W	SCJ1	DNTAG0988	-0.0674067	-0.275257	0.114235
1_DNTAG0989	1	YML111W	BUL2	DNTAG0989	0.0760177	0.136402	0.0129951
1_DNTAG0990	1	YJR036C	HUL4	DNTAG0990	-0.118471	-0.184467	-0.0553617
1_DNTAG0991	1	YGL141W	HUL5	DNTAG0991	-0.10201	-0.167229	-0.0396131
1_DNTAG0993	1	YLR389C	STE23	DNTAG0993	0.0469135	-0.140914	0.21308
1_DNTAG0994	1	YDR251W	PAM1	DNTAG0994	-0.0398963	-0.0146742	-0.0655673
1_DNTAG0995	1	YIL049W	DFG10	DNTAG0995	0.0424241	0.0390611	0.0457793
1_DNTAG0996	1	YPL021W	ECM23	DNTAG0996	-0.0518851	-0.0880364	-0.0166177
1_DNTAG0997	1	YOR032C	HMS1	DNTAG0997	-0.185432	-0.0610559	-0.321551
1_DNTAG0998	1	YMR016C	SOK2	DNTAG0998	0.213993	0.170521	0.256193
1_DNTAG0999	1	YDL024C	DIA3	DNTAG0999	0.115929	0.0261098	0.200482
1_DNTAG1000	1	YDL035C	GPR1	DNTAG1000	-0.0362811	-0.061201	-0.0117843
1_DNTAG1001	1	YMR238W	DFG5	DNTAG1001	0.106503	0.0621666	0.149518
1_DNTAG1002	1	YLR353W	BUD8	DNTAG1002	0.0956622	0.288568	-0.127078
1_DNTAG1003	1	YMR316W	DIA1	DNTAG1003	0.0758296	0.141879	0.00661091
1_DNTAG1004	1	YIR019C	FLO11	DNTAG1004	0.0965045	-0.0356806	0.217588
1_DNTAG1005	1	YER118C	SHO1	DNTAG1005	0.0591226	-0.15344	0.244351
1_DNTAG1007	1	YJR153W	PGU1	DNTAG1007	-0.122054	-0.0718678	-0.17405
1_DNTAG1008	1	YCR038C	BUD5	DNTAG1008	-0.175321	0.00622769	-0.38305
1_DNTAG1009	1	YER109C	FLO8	DNTAG1009	0.0714931	0.104773	0.0374269
1_DNTAG1010	1	YMR164C	MSS11	DNTAG1010	-0.0513481	-0.158495	0.048388
1_DNTAG1011	1	YBR083W	TEC1	DNTAG1011	0.257107	0.327056	0.183593
1_DNTAG1013	1	YOL081W	IRA2	DNTAG1013	-0.232657	0.0193079	-0.538138
1_DNTAG1014	1	YLL016W	SDC25	DNTAG1014	-0.266509	-0.228466	-0.305583
1_DNTAG1015	1	YNL138W	SRV2	DNTAG1015	-0.0713193	-0.0713193
1_DNTAG1016	1	YMR172W	HOT1	DNTAG1016	-0.0433449	0.088526	-0.188493
1_DNTAG1018	1	YDR496C	PUF6	DNTAG1018	0.0489677	0.114655	-0.0198531
1_DNTAG1019	1	YCR097W	HMRA1	DNTAG1019	-0.101884	-0.0779375	-0.126235
1_DNTAG1020	1	YOR129C	AFI1	DNTAG1020	0.0701996	0.14125	-0.00453164
1_DNTAG1021	1	YPL004C	LSP1	DNTAG1021	-0.123374	-0.11154	-0.135306
1_DNTAG1022	1	YDR162C	NBP2	DNTAG1022	0.132544	-0.165469	0.379412
1_DNTAG1023	1	YBR086C	IST2	DNTAG1023	0.0583009	0.185131	-0.0807637
1_DNTAG1024	1	YMR175W	SIP18	DNTAG1024	0.035535	-0.0564291	0.121986
1_DNTAG1025	1	YMR092C	AIP1	DNTAG1025	-0.0524646	0.121421	-0.250218
1_DNTAG1026	1	YPL152W	RRD2	DNTAG1026	0.357445	0.407039	0.306086
1_DNTAG1028	1	YKL026C	GPX1	DNTAG1028	-0.257482	-0.15613	-0.366495
1_DNTAG1029	1	YBR244W	GPX2	DNTAG1029	-0.0606298	-0.045797	-0.0756167
1_DNTAG1030	1	YPL196W	OXR1	DNTAG1030	-0.0994395	-0.108496	-0.0904399
1_DNTAG1031	1	YCL033C	MXR2	DNTAG1031	0.13717	0.258936	0.00417188
1_DNTAG1032	1	YER042W	MXR1	DNTAG1032	-0.0401998	-0.0033019	-0.0780662
1_DNTAG1033	1	YIR037W	HYR1	DNTAG1033	0.132401	0.13911	0.12566
1_DNTAG1034	1	YER174C	GRX4	DNTAG1034	0.0695434	0.178852	-0.0487315
1_DNTAG1035	1	YDR098C	GRX3	DNTAG1035	-0.218064	-0.33169	-0.112738
1_DNTAG1036	1	YCL035C	GRX1	DNTAG1036	0.241128	-0.365933	0.667088
1_DNTAG1037	1	YFL026W	STE2	DNTAG1037	0.177842	0.0502027	0.295101
1_DNTAG1038	1	YNL091W	NST1	DNTAG1038	-0.267685	-0.794386	0.117314
1_DNTAG1039	1	YER019W	ISC1	DNTAG1039	-0.0685359	0.0586446	-0.208021
1_DNTAG1040	1	YNR074C	AIF1	DNTAG1040	-0.432313	-0.505215	-0.362918
1_DNTAG1041	1	YOR010C	TIR2	DNTAG1041	0.0392349	0.144987	-0.0748862
1_DNTAG1042	1	YOR324C	FRT1	DNTAG1042	-0.198017	-0.034641	-0.382284
1_DNTAG1043	1	YAL028W	FRT2	DNTAG1043	-0.0340351	-0.0357229	-0.0323492
1_DNTAG1044	1	YGR234W	YHB1	DNTAG1044	-0.0578867	-0.0444629	-0.0714367
1_DNTAG1045	1	YOL151W	GRE2	DNTAG1045	-0.181838	-0.0365791	-0.343378
1_DNTAG1046	1	YER011W	TIR1	DNTAG1046	-0.170342	-0.146752	-0.194323
1_DNTAG1047	1	YPL240C	HSP82	DNTAG1047	0.107687	-0.0269907	0.230859
1_DNTAG1048	1	YIL033C	BCY1	DNTAG1048	0.372512	0.151874	0.56384
1_DNTAG1049	1	YDR017C	KCS1	DNTAG1049	-0.266077	-0.353897	-0.183297
1_DNTAG1050	1	YNL160W	YGP1	DNTAG1050	-0.0817503	0.0625135	-0.242059
1_DNTAG1051	1	YPL223C	GRE1	DNTAG1051	-0.0735243	-0.0869786	-0.0601942
1_DNTAG1052	1	YDR184C	ATC1	DNTAG1052	0.0729324	-0.0781217	0.209659
1_DNTAG1053	1	YBR082C	UBC4	DNTAG1053	0.0260731	0.205398	-0.178748
1_DNTAG1054	1	YDR171W	HSP42	DNTAG1054	0.215388	0.0566556	0.358373
1_DNTAG1055	1	YHL048W	COS8	DNTAG1055	0.0297935	-0.0679727	0.121353
1_DNTAG1057	1	YPR040W	TIP41	DNTAG1057	0.118838	0.0122472	0.218092
1_DNTAG1058	1	YIL047C	SYG1	DNTAG1058	0.101521	0.0322311	0.167635
1_DNTAG1059	1	YBR077C	SLM4	DNTAG1059	-0.248414	-0.120286	-0.389039
1_DNTAG1060	1	YGL121C	GPG1	DNTAG1060	0.0168454	0.00161082	0.0319207
1_DNTAG1061	1	YOR371C	GPB1	DNTAG1061	-0.221038	-0.0518143	-0.412781
1_DNTAG1066	1	YNL145W	MFA2	DNTAG1066	0.224598	0.570106	-0.230618
1_DNTAG1069	1	YNL173C	MDG1	DNTAG1069	-0.00447462	-0.007724	-0.00123254
1_DNTAG1072	1	YDR085C	AFR1	DNTAG1072	-0.147574	-0.317071	0.00408562
1_DNTAG1074	1	YDR284C	DPP1	DNTAG1074	0.0893578	0.225461	-0.0609355
1_DNTAG1075	1	YFL047W	RGD2	DNTAG1075	-0.0103747	-0.0465467	0.0249125
1_DNTAG1076	1	YOR134W	BAG7	DNTAG1076	0.0155228	0.0302912	0.000601739
1_DNTAG1077	1	YDL240W	LRG1	DNTAG1077	0.334532	0.256333	0.408709
1_DNTAG1078	1	YDR389W	SAC7	DNTAG1078	-0.122916	0.0540664	-0.324686
1_DNTAG1079	1	YDR403W	DIT1	DNTAG1079	-0.101244	-0.0466208	-0.158017
1_DNTAG1080	1	YDR402C	DIT2	DNTAG1080	-0.979178	-1.01356	-0.945598
1_DNTAG1081	1	YLR307W	CDA1	DNTAG1081	-0.224469	-0.108271	-0.350851
1_DNTAG1082	1	YLR308W	CDA2	DNTAG1082	0.270577	0.213079	0.325871
1_DNTAG1083	1	YNL128W	TEP1	DNTAG1083	-0.0495692	-0.0952734	-0.00526859
1_DNTAG1084	1	YHR185C	PFS1	DNTAG1084	0.0732432	-0.148662	0.265523
1_DNTAG1085	1	YDR104C	SPO71	DNTAG1085	-0.0785214	-0.0232353	-0.136011
1_DNTAG1086	1	YHR139C	SPS100	DNTAG1086	-0.125562	-0.0281225	-0.230061
1_DNTAG1087	1	YOR242C	SSP2	DNTAG1087	-0.260813		-0.260813
1_DNTAG1088	1	YBR045C	GIP1	DNTAG1088	-0.152124	0.10682	-0.467939
1_DNTAG1089	1	YOR298W	MUM3	DNTAG1089	0.0875298	0.197423	-0.03143
1_DNTAG1090	1	YDR260C	SWM1	DNTAG1090	-0.0596564	0.213301	-0.396599
1_DNTAG1091	1	YNL204C	SPS18	DNTAG1091	-0.14281	0.0368767	-0.348104
1_DNTAG1092	1	YER132C	PMD1	DNTAG1092	-0.107454	-0.0501466	-0.167132
1_DNTAG1093	1	YOR190W	SPR1	DNTAG1093	-0.207178	-0.223505	-0.191034
1_DNTAG1094	1	YMR063W	RIM9	DNTAG1094	0.217412	0.284578	0.146966
1_DNTAG1095	1	YHR153C	SPO16	DNTAG1095	-0.065799	-0.0309367	-0.101525
1_DNTAG1097	1	YIL099W	SGA1	DNTAG1097	-0.00648338	0.103296	-0.12531
1_DNTAG1099	1	YNL098C	RAS2	DNTAG1099	0.179605	0.22408	0.133715
1_DNTAG1100	1	YGR225W	AMA1	DNTAG1100	0.0922976	0.0727798	0.111555
1_DNTAG1101	1	YDR522C	SPS2	DNTAG1101	-0.140646	-0.0266955	-0.264376
1_DNTAG1102	1	YNL294C	RIM21	DNTAG1102	-0.0655445	-0.13273	-0.00134883
1_DNTAG1103	1	YOR313C	SPS4	DNTAG1103	-0.168803	-0.261993	-0.0812697
1_DNTAG1104	1	YBL058W	SHP1	DNTAG1104	-0.414422	-0.45571	-0.374283
1_DNTAG1105	1	YAL009W	SPO7	DNTAG1105	-0.217906	-0.0225512	-0.44392
1_DNTAG1106	1	YLR341W	SPO77	DNTAG1106	0.183976	-0.0652535	0.396426
1_DNTAG1107	1	YHR004C	NEM1	DNTAG1107	-0.12665	-0.0934579	-0.160624
1_DNTAG1108	1	YER177W	BMH1	DNTAG1108	-0.187391	-0.0190403	-0.378015
1_DNTAG1109	1	YDR099W	BMH2	DNTAG1109	0.0101898	0.0125251	0.00785083
1_DNTAG1110	1	YIR026C	YVH1	DNTAG1110	-0.136244	-0.212553	-0.0637698
1_DNTAG1111	1	YGL181W	GTS1	DNTAG1111	-0.0619759	-0.311063	0.150371
1_DNTAGbre1KO	1	BRE1_Plate1	BRE1	DNTAGbre1KO	-2.20492	-2.37516	-2.05267
1_DNTAGdot1KO	1	DOT1_Plate1	DOT1	DNTAGdot1KO	0.0983012	0.0984633	0.0981391
1_DNTAGDot1OE	1	DOT1OE_Plate1	DOT1OE	DNTAGDot1OE	2.46719	2.46719
2_DNTAG0001	2	YOL043C	NTG2	DNTAG0001	0.238487	-0.179323	0.562076
2_DNTAG0003	2	YJL218W	YJL218W	DNTAG0003	-0.232018	-0.275777	-0.189548
2_DNTAG0004	2	YEL052W	AFG1	DNTAG0004	-0.00592736	-0.0506386	0.0374397
2_DNTAG0005	2	YPL074W	YTA6	DNTAG0005	0.196333	0.094795	0.291192
2_DNTAG0006	2	YDR061W	YDR061W	DNTAG0006	0.172335	0.190862	0.153566
2_DNTAG0008	2	YJL084C	ALY2	DNTAG0008	-0.151507	-0.203216	-0.101588
2_DNTAG0009	2	YGR163W	GTR2	DNTAG0009	0.0802654	0.120219	0.039174
2_DNTAG0010	2	YLR289W	GUF1	DNTAG0010	-0.0329836	-0.0426361	-0.0233953
2_DNTAG0011	2	YDR291W	HRQ1	DNTAG0011	0.00496597	-0.0214567	0.0309134
2_DNTAG0012	2	YFR038W	IRC5	DNTAG0012	-0.017668	0.141011	-0.195981
2_DNTAG0013	2	YLR419W	YLR419W	DNTAG0013	-0.104044	-0.0820879	-0.12634
2_DNTAG0014	2	YLR118C	YLR118C	DNTAG0014	-0.0974475	-0.184041	-0.0157582
2_DNTAG0015	2	YJR107W	YJR107W	DNTAG0015	0.145928	0.172113	0.119259
2_DNTAG0016	2	YFL061W	DDI2	DNTAG0016	-0.121031	-0.156925	-0.0860086
2_DNTAG0017	2	YPL189W	GUP2	DNTAG0017	0.0489703	-0.0446113	0.13685
2_DNTAG0018	2	YJR138W	IML1	DNTAG0018	0.0662117	0.167036	-0.0421921
2_DNTAG0019	2	YPL024W	RMI1	DNTAG0019	0.0949658	0.103795	0.086082
2_DNTAG0020	2	YDR383C	NKP1	DNTAG0020	-0.0109367	-0.0508217	0.0278751
2_DNTAG0021	2	YLR315W	NKP2	DNTAG0021	-0.0153674	0.0981988	-0.138643
2_DNTAG0022	2	YBR233W	PBP2	DNTAG0022	-0.153054	-0.0904981	-0.218445
2_DNTAG0023	2	YFR023W	PES4	DNTAG0023	-0.0384144	-0.0354713	-0.0413636
2_DNTAG0024	2	YOR104W	PIN2	DNTAG0024	-0.15843	-0.184787	-0.132546
2_DNTAG0025	2	YDR505C	PSP1	DNTAG0025	0.0268533	0.0513197	0.00196489
2_DNTAG0027	2	YDL001W	RMD1	DNTAG0027	0.0146319	-0.12784	0.14429
2_DNTAG0028	2	YHL023C	NPR3	DNTAG0028	0.256802	0.174032	0.335079
2_DNTAG0029	2	YEL072W	RMD6	DNTAG0029	-0.112029	-0.066174	-0.15939
2_DNTAG0030	2	YFR048W	RMD8	DNTAG0030	0.131072	-0.0372261	0.281772
2_DNTAG0031	2	YMR266W	RSN1	DNTAG0031	0.0373476	-0.693072	0.51996
2_DNTAG0032	2	YGL056C	SDS23	DNTAG0032	-0.250174	-0.200026	-0.302128
2_DNTAG0033	2	YBL031W	SHE1	DNTAG0033	-0.362836	-0.294206	-0.434896
2_DNTAG0034	2	YGL228W	SHE10	DNTAG0034	-0.176254	-0.207329	-0.145835
2_DNTAG0035	2	YLR187W	SKG3	DNTAG0035	-0.0325458	0.181731	-0.284294
2_DNTAG0036	2	YIL011W	TIR3	DNTAG0036	0.175956	0.121995	0.227972
2_DNTAG0037	2	YEL038W	UTR4	DNTAG0037	-0.150825	-0.0657225	-0.241265
2_DNTAG0038	2	YNL212W	VID27	DNTAG0038	0.0904012	0.0347089	0.144023
2_DNTAG0039	2	YPL239W	YAR1	DNTAG0039	0.816357		0.816357
2_DNTAG0041	2	YBR094W	PBY1	DNTAG0041	0.0776133	0.0917236	0.0633636
2_DNTAG0042	2	YBR108W	AIM3	DNTAG0042	-0.135272	-0.228918	-0.0473349
2_DNTAG0044	2	YBR255W	MTC4	DNTAG0044	-0.0526805	-0.180642	0.0648502
2_DNTAG0045	2	YBR284W	YBR284W	DNTAG0045	-0.171614	-0.0851878	-0.26355
2_DNTAG0046	2	YDL114W	YDL114W	DNTAG0046	-0.0503139	-0.0712474	-0.0296798
2_DNTAG0047	2	YDR249C	YDR249C	DNTAG0047	0.0668361	-0.106647	0.221679
2_DNTAG0049	2	YEL041W	YEF1	DNTAG0049	-0.0610502	-0.0315883	-0.0911264
2_DNTAG0050	2	YER066W	RRT13	DNTAG0050	-0.187421	0.00171569	-0.405148
2_DNTAG0051	2	YGL242C	YGL242C	DNTAG0051	-0.104408	-0.00431172	-0.21197
2_DNTAG0052	2	YGR126W	YGR126W	DNTAG0052	0.0144621	0.282831	-0.315506
2_DNTAG0053	2	YIR024C	INA22	DNTAG0053	-0.0417521	0.0589173	-0.149977
2_DNTAG0054	2	YJL149W	DAS1	DNTAG0054	1.07019		1.07019
2_DNTAG0055	2	YJR142W	YJR142W	DNTAG0055	0.0281036	0.145908	-0.100183
2_DNTAG0056	2	YKL056C	TMA19	DNTAG0056	-0.148481	-0.284094	-0.0245281
2_DNTAG0057	2	YKL151C	YKL151C	DNTAG0057	-0.0684865	-0.0674777	-0.069496
2_DNTAG0058	2	YLL007C	LMO1	DNTAG0058	0.0337212	0.112501	-0.0496101
2_DNTAG0059	2	YLL049W	LDB18	DNTAG0059	0.151724	0.0229449	0.269943
2_DNTAG0060	2	YLR179C	YLR179C	DNTAG0060	0.0954891	0.0859705	0.104945
2_DNTAG0061	2	YLR218C	COA4	DNTAG0061	0.406084	-0.327934	0.890245
2_DNTAG0062	2	YLR254C	NDL1	DNTAG0062	0.10879	0.170614	0.0441977
2_DNTAG0063	2	YLR352W	YLR352W	DNTAG0063	-0.13263	-0.0375946	-0.23437
2_DNTAG0064	2	YMR262W	YMR262W	DNTAG0064	-0.0604407	-0.281641	0.13131
2_DNTAG0065	2	YOL111C	MDY2	DNTAG0065	0.264089	0.355486	0.166507
2_DNTAG0066	2	YOL161C	PAU20	DNTAG0066	0.00472249	0.211662	-0.236953
2_DNTAG0067	2	YOR296W	YOR296W	DNTAG0067	0.120853	0.0435892	0.194189
2_DNTAG0068	2	YOR322C	LDB19	DNTAG0068	-0.298436	-0.362526	-0.237073
2_DNTAG0069	2	YOR378W	AMF1	DNTAG0069	0.103143	0.122577	0.0834444
2_DNTAG0070	2	YPL066W	RGL1	DNTAG0070	-0.359903	-0.377935	-0.342094
2_DNTAG0071	2	YPL144W	POC4	DNTAG0071	-0.103837	-0.205262	-0.00907751
2_DNTAG0073	2	YDR130C	FIN1	DNTAG0073	0.0837909	0.0666671	0.100714
2_DNTAG0075	2	YPR106W	ISR1	DNTAG0075	-0.0211456	-0.105933	0.0589344
2_DNTAG0076	2	YOR233W	KIN4	DNTAG0076	-0.095759	-0.173326	-0.0221509
2_DNTAG0077	2	YBR125C	PTC4	DNTAG0077	0.0407464	0.0607752	0.0204357
2_DNTAG0078	2	YGR203W	YCH1	DNTAG0078	0.162241	0.314014	-0.0073974
2_DNTAG0080	2	YJR129C	EFM3	DNTAG0080	0.136837	0.108728	0.164409
2_DNTAG0081	2	YPL017C	IRC15	DNTAG0081	-0.0346842	-0.050388	-0.0191494
2_DNTAG0082	2	YDR501W	PLM2	DNTAG0082	-0.155602	-0.0228034	-0.301875
2_DNTAG0083	2	YLR183C	TOS4	DNTAG0083	0.674371	0.903089	0.402433
2_DNTAG0084	2	YGL096W	TOS8	DNTAG0084	0.185202	0.137314	0.231551
2_DNTAG0085	2	YNR048W	YNR048W	DNTAG0085	-0.180136	-0.145294	-0.21584
2_DNTAG0086	2	YJL197W	UBP12	DNTAG0086	-0.113747	-0.0483318	-0.182269
2_DNTAG0087	2	YBL067C	UBP13	DNTAG0087	-0.253909	-0.10399	-0.421233
2_DNTAG0088	2	YAL020C	ATS1	DNTAG0088	-0.329272	-0.265836	-0.395628
2_DNTAG0089	2	YKR048C	NAP1	DNTAG0089	-0.097575	0.106838	-0.335809
2_DNTAG0090	2	YKL110C	KTI12	DNTAG0090	-0.291225	-0.201296	-0.387134
2_DNTAG0092	2	YNL289W	PCL1	DNTAG0092	-0.0807576	0.0832008	-0.265767
2_DNTAG0093	2	YDL127W	PCL2	DNTAG0093	-0.0517996	0.148786	-0.284848
2_DNTAG0094	2	YHR071W	PCL5	DNTAG0094	0.130419	0.0611655	0.1965
2_DNTAG0095	2	YDL179W	PCL9	DNTAG0095	-0.207781	-0.277606	-0.14118
2_DNTAG0097	2	YMR052W	FAR3	DNTAG0097	0.298438	0.401108	0.187896
2_DNTAG0098	2	YPR075C	OPY2	DNTAG0098	0.0755748	0.150594	-0.00356036
2_DNTAG0099	2	YKL160W	ELF1	DNTAG0099	-0.316739	-0.381274	-0.254967
2_DNTAG0100	2	YPL089C	RLM1	DNTAG0100	-0.00343247	-0.0797324	0.0690341
2_DNTAG0102	2	YKL129C	MYO3	DNTAG0102	0.0136429	-0.0937942	0.113631
2_DNTAG0103	2	YMR109W	MYO5	DNTAG0103	0.825756		0.825756
2_DNTAG0104	2	YPR030W	CSR2	DNTAG0104	-0.023629	-0.0157696	-0.0315315
2_DNTAG0105	2	YMR234W	RNH1	DNTAG0105	-0.104063	-0.0692709	-0.139716
2_DNTAG0106	2	YJL042W	MHP1	DNTAG0106	-0.126715	-0.0523188	-0.205158
2_DNTAG0107	2	YOR191W	ULS1	DNTAG0107	-0.197466	-0.128559	-0.269831
2_DNTAG0108	2	YMR284W	YKU70	DNTAG0108	-0.0542486	-0.188556	0.0686134
2_DNTAG0109	2	YMR106C	YKU80	DNTAG0109	-0.0379532	-0.0307058	-0.0452372
2_DNTAG0111	2	YNL097C	PHO23	DNTAG0111	0.477669	0.420569	0.532595
2_DNTAG0112	2	YBR245C	ISW1	DNTAG0112	-0.147562	-0.153396	-0.141752
2_DNTAG0113	2	YGR056W	RSC1	DNTAG0113	-0.362629	-0.342601	-0.382938
2_DNTAG0114	2	YFR013W	IOC3	DNTAG0114	0.12338	-0.220034	0.400562
2_DNTAG0116	2	YGL163C	RAD54	DNTAG0116	0.561275	0.806469	0.2657
2_DNTAG0118	2	YOL017W	ESC8	DNTAG0118	-0.141084	0.0773509	-0.398596
2_DNTAG0119	2	YDR181C	SAS4	DNTAG0119	-0.438766	-0.355096	-0.527588
2_DNTAG0120	2	YOR213C	SAS5	DNTAG0120	-0.651035	-0.658984	-0.64313
2_DNTAG0121	2	YJL065C	DLS1	DNTAG0121	-0.401486	-0.293644	-0.518045
2_DNTAG0122	2	YMR219W	ESC1	DNTAG0122	0.053054	0.161397	-0.0640911
2_DNTAG0123	2	YLR015W	BRE2	DNTAG0123	0.199966	0.27842	0.116999
2_DNTAG0124	2	YDR469W	SDC1	DNTAG0124	0.0989344	0.00126036	0.190413
2_DNTAG0125	2	YBR175W	SWD3	DNTAG0125	0.35663	0.24541	0.459885
2_DNTAG0126	2	YLR288C	MEC3	DNTAG0126	0.107767	0.151784	0.062364
2_DNTAG0127	2	YBR278W	DPB3	DNTAG0127	0.0758793	0.0985549	0.0528415
2_DNTAG0128	2	YDR121W	DPB4	DNTAG0128	-0.143438	0.0213306	-0.32948
2_DNTAG0129	2	YPL001W	HAT1	DNTAG0129	0.11317	-0.00269741	0.220419
2_DNTAG0131	2	YHR119W	SET1	DNTAG0131	0.170223	0.322447	2.04568e-05
2_DNTAG0132	2	YCL061C	MRC1	DNTAG0132	0.283086	0.37061	0.189906
2_DNTAG0133	2	YGL037C	PNC1	DNTAG0133	0.0131812	0.160749	-0.151219
2_DNTAG0134	2	YOR209C	NPT1	DNTAG0134	0.156853	0.289001	0.0113689
2_DNTAG0135	2	YDR440W	DOT1	DNTAG0135	0.327967	0.222901	0.425898
2_DNTAG0136	2	YPL138C	SPP1	DNTAG0136	-0.0158285	-0.104	0.0672635
2_DNTAG0137	2	YAL019W	FUN30	DNTAG0137	0.0470454	0.304716	-0.266875
2_DNTAG0138	2	YDR254W	CHL4	DNTAG0138	-0.0797731	0.0147641	-0.180942
2_DNTAG0140	2	YBR107C	IML3	DNTAG0140	-0.0563892	-0.0720826	-0.0408646
2_DNTAG0141	2	YGR089W	NNF2	DNTAG0141	-0.273311	-0.398204	-0.158375
2_DNTAG0142	2	YLR381W	CTF3	DNTAG0142	-0.0767922	-0.0816208	-0.0719798
2_DNTAG0143	2	YPR046W	MCM16	DNTAG0143	0.133196	0.100986	0.164702
2_DNTAG0144	2	YDR318W	MCM21	DNTAG0144	-0.185605	-0.190966	-0.180265
2_DNTAG0146	2	YAR018C	KIN3	DNTAG0146	-0.266505	-0.0390437	-0.536666
2_DNTAG0147	2	YPL008W	CHL1	DNTAG0147	0.516342	0.710434	0.292017
2_DNTAG0148	2	YCR077C	PAT1	DNTAG0148	0.204331	0.249485	0.157718
2_DNTAG0149	2	YPL018W	CTF19	DNTAG0149	0.160989	-0.201999	0.450762
2_DNTAG0151	2	YJR053W	BFA1	DNTAG0151	0.0509157	0.0722378	0.0292737
2_DNTAG0152	2	YDR435C	PPM1	DNTAG0152	0.0992842	0.0245765	0.170313
2_DNTAG0153	2	YNL327W	EGT2	DNTAG0153	0.00203477	0.0169216	-0.0130073
2_DNTAG0156	2	YBR023C	CHS3	DNTAG0156	-0.0333216	-0.135157	0.0617974
2_DNTAG0157	2	YBL061C	SKT5	DNTAG0157	0.057478	0.0521062	0.0628298
2_DNTAG0158	2	YNL166C	BNI5	DNTAG0158	-0.0592988	-0.00693954	-0.11363
2_DNTAG0161	2	YNR067C	DSE4	DNTAG0161	0.217309	0.372182	0.0437892
2_DNTAG0165	2	YJL115W	ASF1	DNTAG0165	0.69675	1.08752	0.159123
2_DNTAG0166	2	YER142C	MAG1	DNTAG0166	0.0514872	-0.0843831	0.175656
2_DNTAG0167	2	YLR427W	MAG2	DNTAG0167	0.144077	0.140354	0.14779
2_DNTAG0168	2	YDL200C	MGT1	DNTAG0168	0.0071836	0.201717	-0.217731
2_DNTAG0169	2	YGR081C	SLX9	DNTAG0169	-0.314354	-0.823716	0.0613443
2_DNTAG0170	2	YER116C	SLX8	DNTAG0170	1.09959	0.922125	1.25759
2_DNTAG0172	2	YOL090W	MSH2	DNTAG0172	-0.138923	-0.0300039	-0.256742
2_DNTAG0173	2	YCR092C	MSH3	DNTAG0173	0.220336	0.314618	0.119459
2_DNTAG0174	2	YML061C	PIF1	DNTAG0174	-0.0410463	-0.0911104	0.0073387
2_DNTAG0175	2	YJL208C	NUC1	DNTAG0175	0.0400045	0.0343981	0.0455891
2_DNTAG0176	2	YDR110W	FOB1	DNTAG0176	0.0312831	0.214643	-0.178821
2_DNTAG0177	2	YHR120W	MSH1	DNTAG0177	0.0705263	0.241635	-0.123642
2_DNTAG0178	2	YLR032W	RAD5	DNTAG0178	0.0622477	0.127096	-0.00565377
2_DNTAG0179	2	YMR173W	DDR48	DNTAG0179	-0.166843	-0.451924	0.0710939
2_DNTAG0180	2	YJR069C	HAM1	DNTAG0180	0.0488961	0.0714958	0.0259367
2_DNTAG0182	2	YDR030C	RAD28	DNTAG0182	0.117078	0.282584	-0.0699056
2_DNTAG0183	2	YDR263C	DIN7	DNTAG0183	0.00786094	-0.0675057	0.0794851
2_DNTAG0184	2	YBL019W	APN2	DNTAG0184	-0.0332621	-0.0960761	0.0269308
2_DNTAG0185	2	YMR156C	TPP1	DNTAG0185	-0.0298076	-0.0320656	-0.0275531
2_DNTAG0186	2	YIR002C	MPH1	DNTAG0186	0.209931	0.156054	0.261867
2_DNTAG0187	2	YBR223C	TDP1	DNTAG0187	0.145863	0.275357	0.00359046
2_DNTAG0191	2	YBR228W	SLX1	DNTAG0191	-0.0739755	-0.0651654	-0.0828397
2_DNTAG0192	2	YMR137C	PSO2	DNTAG0192	-0.168862	-0.177981	-0.1598
2_DNTAG0193	2	YPR135W	CTF4	DNTAG0193	0.546261	0.48977	0.600622
2_DNTAG0194	2	YJR144W	MGM101	DNTAG0194	0.0588833	0.0384142	0.079066
2_DNTAG0195	2	YJL092W	SRS2	DNTAG0195	0.263075	0.0936494	0.414679
2_DNTAG0196	2	YKL114C	APN1	DNTAG0196	-0.0688525	-0.00540437	-0.13522
2_DNTAG0197	2	YAL015C	NTG1	DNTAG0197	-0.148329	-0.149834	-0.146825
2_DNTAG0198	2	YOR346W	REV1	DNTAG0198	-0.115986	0.0176739	-0.263305
2_DNTAG0199	2	YDR386W	MUS81	DNTAG0199	-0.142753	-0.089429	-0.198123
2_DNTAG0200	2	YDR419W	RAD30	DNTAG0200	-0.0645779	-0.0276576	-0.102468
2_DNTAG0201	2	YHR081W	LRP1	DNTAG0201	0.0864235	0.142156	0.0284509
2_DNTAG0202	2	YPR164W	MMS1	DNTAG0202	0.391	0.394528	0.387463
2_DNTAG0203	2	YLR265C	NEJ1	DNTAG0203	-0.123234	0.00562386	-0.26474
2_DNTAG0205	2	YGL127C	SOH1	DNTAG0205	0.79816	1.04371	0.502065
2_DNTAG0206	2	YDR079C-A	TFB5	DNTAG0206	-0.578097	-0.632185	-0.525964
2_DNTAG0207	2	YKL025C	PAN3	DNTAG0207	0.0165404	0.165004	-0.148972
2_DNTAG0209	2	YMR224C	MRE11	DNTAG0209	0.347321	0.506524	0.168346
2_DNTAG0210	2	YIL153W	RRD1	DNTAG0210	0.31605	0.4598	0.156376
2_DNTAG0211	2	YML060W	OGG1	DNTAG0211	-0.299066	-0.162778	-0.449584
2_DNTAG0212	2	YER169W	RPH1	DNTAG0212	0.254881	0.153316	0.349763
2_DNTAG0214	2	YBR098W	MMS4	DNTAG0214	0.0417021	0.203774	-0.140909
2_DNTAG0215	2	YML102W	CAC2	DNTAG0215	0.217874	0.237329	0.198153
2_DNTAG0216	2	YBR195C	MSI1	DNTAG0216	0.226798	0.176109	0.275766
2_DNTAG0217	2	YPL167C	REV3	DNTAG0217	-0.113499	0.00755824	-0.245653
2_DNTAG0218	2	YIL139C	REV7	DNTAG0218	0.0361224	-0.288918	0.301228
2_DNTAG0219	2	YHR031C	RRM3	DNTAG0219	0.415811	0.479801	0.34885
2_DNTAG0220	2	YGL168W	HUR1	DNTAG0220	0.588367	0.503567	0.668458
2_DNTAG0222	2	YDR279W	RNH202	DNTAG0222	-0.0860125	0.0265714	-0.208132
2_DNTAG0223	2	YLR154C	RNH203	DNTAG0223	0.0198592	0.177344	-0.156947
2_DNTAG0224	2	YER070W	RNR1	DNTAG0224	0.885939	0.624363	1.10729
2_DNTAG0225	2	YIL066C	RNR3	DNTAG0225	-0.0732587	-0.0563336	-0.0903847
2_DNTAG0226	2	YGR180C	RNR4	DNTAG0226	0.150284	0.45561	-0.237501
2_DNTAG0227	2	YNL273W	TOF1	DNTAG0227	0.142935	0.230639	0.049552
2_DNTAG0228	2	YGR276C	RNH70	DNTAG0228	0.155526	0.126104	0.18436
2_DNTAG0229	2	YLR135W	SLX4	DNTAG0229	0.0747828	0.176229	-0.0343403
2_DNTAG0230	2	YNL218W	MGS1	DNTAG0230	-0.100528	-0.259333	0.0425175
2_DNTAG0231	2	YCR086W	CSM1	DNTAG0231	0.318865	-0.717145	0.915633
2_DNTAG0232	2	YOR144C	ELG1	DNTAG0232	-0.0907091	-0.00614943	-0.180535
2_DNTAG0233	2	YKR010C	TOF2	DNTAG0233	0.0600337	0.0244595	0.0947518
2_DNTAG0236	2	YLR320W	MMS22	DNTAG0236	0.883107	0.793767	0.967236
2_DNTAG0237	2	YOR005C	DNL4	DNTAG0237	0.0164046	-0.0329226	0.0641009
2_DNTAG0239	2	YGL090W	LIF1	DNTAG0239	-0.133323	-0.136421	-0.130233
2_DNTAG0240	2	YCR014C	POL4	DNTAG0240	-0.141346	-0.146588	-0.136123
2_DNTAG0243	2	YNL250W	RAD50	DNTAG0243	0.385334	0.592377	0.143519
2_DNTAG0244	2	YDR369C	XRS2	DNTAG0244	0.188444	0.109997	0.262844
2_DNTAG0245	2	YBR214W	SDS24	DNTAG0245	0.0722989	0.128472	0.0138492
2_DNTAG0246	2	YIL135C	VHS2	DNTAG0246	0.314594	0.23307	0.391757
2_DNTAG0247	2	YFR040W	SAP155	DNTAG0247	0.431831	0.48443	0.37724
2_DNTAG0248	2	YJL098W	SAP185	DNTAG0248	-0.0668929	0.0124163	-0.150817
2_DNTAG0249	2	YKR028W	SAP190	DNTAG0249	0.090163	0.239625	-0.0765913
2_DNTAG0250	2	YGL229C	SAP4	DNTAG0250	-0.137076	-0.0649063	-0.213047
2_DNTAG0252	2	YPR120C	CLB5	DNTAG0252	0.141111	0.268289	0.00162872
2_DNTAG0253	2	YGR109C	CLB6	DNTAG0253	-0.19262	0.0578631	-0.495923
2_DNTAG0254	2	YAL040C	CLN3	DNTAG0254	-0.136912	-0.139615	-0.134214
2_DNTAG0255	2	YER167W	BCK2	DNTAG0255	0.2434	0.40428	0.0623012
2_DNTAG0256	2	YKR072C	SIS2	DNTAG0256	0.261691	0.426794	0.0752211
2_DNTAG0257	2	YOR054C	VHS3	DNTAG0257	-0.0399143	0.157011	-0.268033
2_DNTAG0258	2	YLR079W	SIC1	DNTAG0258	0.834336	1.01652	0.625769
2_DNTAG0259	2	YJR059W	PTK2	DNTAG0259	-0.0730371	0.0945899	-0.262733
2_DNTAG0260	2	YCR008W	SAT4	DNTAG0260	0.0687205	0.0545241	0.0827785
2_DNTAG0261	2	YER089C	PTC2	DNTAG0261	0.0638742	-0.122924	0.229235
2_DNTAG0262	2	YER111C	SWI4	DNTAG0262	0.418277	0.624821	0.177142
2_DNTAG0265	2	YBR215W	HPC2	DNTAG0265	-0.156388	-0.05972	-0.260002
2_DNTAG0266	2	YLR131C	ACE2	DNTAG0266	0.211195	0.254411	0.166645
2_DNTAG0267	2	YDR146C	SWI5	DNTAG0267	0.102806	0.205871	-0.00819175
2_DNTAG0268	2	YGR108W	CLB1	DNTAG0268	0.131339	0.279547	-0.0338553
2_DNTAG0269	2	YPR119W	CLB2	DNTAG0269	0.0172589	0.0700436	-0.0375307
2_DNTAG0270	2	YDL155W	CLB3	DNTAG0270	-0.0466116	0.0610777	-0.162993
2_DNTAG0271	2	YLR210W	CLB4	DNTAG0271	0.306193	0.107991	0.480425
2_DNTAG0272	2	YBL051C	PIN4	DNTAG0272	0.217302	0.281278	0.150358
2_DNTAG0273	2	YJL187C	SWE1	DNTAG0273	0.00870597	0.110954	-0.101345
2_DNTAG0274	2	YMR036C	MIH1	DNTAG0274	0.180509	0.0758908	0.278051
2_DNTAG0276	2	YPR193C	HPA2	DNTAG0276	-0.0865139	0.00409054	-0.183192
2_DNTAG0277	2	YEL066W	HPA3	DNTAG0277	0.0184444	0.0377352	-0.00110798
2_DNTAG0278	2	YGR252W	GCN5	DNTAG0278	-0.13861	-0.203189	-0.0767984
2_DNTAG0279	2	YOR064C	YNG1	DNTAG0279	0.0210721	0.0613412	-0.0203534
2_DNTAG0280	2	YIL112W	HOS4	DNTAG0280	0.142506	0.122877	0.161872
2_DNTAG0281	2	YKR029C	SET3	DNTAG0281	0.278434	0.270192	0.286629
2_DNTAG0283	2	YBR258C	SHG1	DNTAG0283	-0.175884	-0.100716	-0.255185
2_DNTAG0284	2	YKL017C	HCS1	DNTAG0284	-0.254184	-0.275411	-0.233265
2_DNTAG0285	2	YGR230W	BNS1	DNTAG0285	-0.12661	-0.115379	-0.13793
2_DNTAG0287	2	YDL115C	IWR1	DNTAG0287	0.0823626	-0.00713918	0.166635
2_DNTAG0288	2	YPL130W	SPO19	DNTAG0288	0.0299693	0.109609	-0.0543254
2_DNTAG0289	2	YIL073C	SPO22	DNTAG0289	0.393789	0.279428	0.499746
2_DNTAG0290	2	YNL012W	SPO1	DNTAG0290	-0.11285	-0.0411166	-0.188337
2_DNTAG0291	2	YBL009W	ALK2	DNTAG0291	-0.0241603	-0.0449003	-0.00371412
2_DNTAG0292	2	YJR094C	IME1	DNTAG0292	-0.117482	-0.0344633	-0.205572
2_DNTAG0293	2	YGR247W	CPD1	DNTAG0293	-0.231952	-0.167845	-0.29904
2_DNTAG0294	2	YPR007C	REC8	DNTAG0294	-0.11019	-0.061313	-0.160782
2_DNTAG0295	2	YDR285W	ZIP1	DNTAG0295	-0.220735	-0.386437	-0.0721199
2_DNTAG0296	2	YIL072W	HOP1	DNTAG0296	-0.28392	-0.210429	-0.361356
2_DNTAG0297	2	YNL082W	PMS1	DNTAG0297	-0.0417382	-0.0781434	-0.00622898
2_DNTAG0298	2	YGL251C	HFM1	DNTAG0298	-0.226797	-0.378171	-0.0898079
2_DNTAG0299	2	YNL025C	SSN8	DNTAG0299	0.497148	0.775418	0.152061
2_DNTAG0300	2	YMR198W	CIK1	DNTAG0300	0.254175	0.156894	0.345308
2_DNTAG0301	2	YPR141C	KAR3	DNTAG0301	0.250617	0.349006	0.145023
2_DNTAG0302	2	YFR046C	CNN1	DNTAG0302	-0.189351	-0.114305	-0.268515
2_DNTAG0303	2	YPL194W	DDC1	DNTAG0303	-0.0616829	-0.112006	-0.0130564
2_DNTAG0304	2	YDR273W	DON1	DNTAG0304	0.0497525	0.10505	-0.00774942
2_DNTAG0305	2	YPL055C	LGE1	DNTAG0305	-1.92198	-2.17511	-1.7067
2_DNTAG0306	2	YGL045W	RIM8	DNTAG0306	0.255181	-0.0734975	0.522699
2_DNTAG0307	2	YOR195W	SLK19	DNTAG0307	-0.0837057	0.118834	-0.319398
2_DNTAG0308	2	YPL033C	SRL4	DNTAG0308	0.0804162	0.154089	0.00277752
2_DNTAG0309	2	YPR078C	YPR078C	DNTAG0309	-0.157992	-0.507775	0.123317
2_DNTAG0310	2	YGL192W	IME4	DNTAG0310	-0.0948672	-0.0324773	-0.160078
2_DNTAG0312	2	YJR066W	TOR1	DNTAG0312	-0.045293	0.0179179	-0.111401
2_DNTAG0313	2	YOR178C	GAC1	DNTAG0313	-0.266055	-0.328963	-0.205776
2_DNTAG0315	2	YHL024W	RIM4	DNTAG0315	-0.151968	0.0431957	-0.377725
2_DNTAG0316	2	YNL210W	MER1	DNTAG0316	-0.0599707	-0.0913529	-0.0292565
2_DNTAG0317	2	YER179W	DMC1	DNTAG0317	-0.161126	-0.195225	-0.127815
2_DNTAG0318	2	YGR044C	RME1	DNTAG0318	-0.0674262	0.0128466	-0.15243
2_DNTAG0319	2	YOL091W	SPO21	DNTAG0319	-0.0256323	0.015416	-0.0678828
2_DNTAG0321	2	YCL055W	KAR4	DNTAG0321	-0.0804556	0.0591795	-0.235068
2_DNTAG0322	2	YIL132C	CSM2	DNTAG0322	-0.110927	-0.0661425	-0.157147
2_DNTAG0324	2	YER106W	MAM1	DNTAG0324	0.0734396	0.0469975	0.0994058
2_DNTAG0325	2	YMR048W	CSM3	DNTAG0325	0.213516	0.0337193	0.373368
2_DNTAG0326	2	YHL022C	SPO11	DNTAG0326	-0.133912	-0.147506	-0.120446
2_DNTAG0327	2	YGL175C	SAE2	DNTAG0327	-0.0049926	0.043087	-0.0547299
2_DNTAG0328	2	YDR076W	RAD55	DNTAG0328	0.0879758	0.224854	-0.0632631
2_DNTAG0329	2	YFL003C	MSH4	DNTAG0329	0.0249743	0.0500129	-0.000506482
2_DNTAG0331	2	YML128C	MSC1	DNTAG0331	0.173876	0.213996	0.132608
2_DNTAG0332	2	YLR219W	MSC3	DNTAG0332	0.162249	0.203833	0.119432
2_DNTAG0334	2	YHR039C	MSC7	DNTAG0334	-0.0277589	0.181734	-0.272925
2_DNTAG0336	2	YJR021C	REC107	DNTAG0336	-0.149637	-0.129156	-0.170414
2_DNTAG0338	2	YER173W	RAD24	DNTAG0338	0.125773	-0.0200969	0.25824
2_DNTAG0339	2	YLR234W	TOP3	DNTAG0339	0.44824	0.615406	0.259135
2_DNTAG0340	2	YBR073W	RDH54	DNTAG0340	-0.0450268	-0.114108	0.0208976
2_DNTAG0341	2	YOR368W	RAD17	DNTAG0341	0.103934	-0.152827	0.321829
2_DNTAG0342	2	YPL121C	MEI5	DNTAG0342	-0.0851312	0.0220914	-0.200967
2_DNTAG0343	2	YPL164C	MLH3	DNTAG0343	-0.256882	-0.0992141	-0.433919
2_DNTAG0344	2	YIR025W	MND2	DNTAG0344	-0.0755089	0.166126	-0.365921
2_DNTAG0346	2	YMR133W	REC114	DNTAG0346	-0.057356	-0.0417174	-0.0731661
2_DNTAG0347	2	YHR079C-A	SAE3	DNTAG0347	-0.0619811	-0.161177	0.0308312
2_DNTAG0349	2	YLR329W	REC102	DNTAG0349	0.0763949	-0.0411512	0.185081
2_DNTAG0350	2	YHL029C	OCA5	DNTAG0350	-0.172631	-0.0989922	-0.250231
2_DNTAG0351	2	YJR108W	ABM1	DNTAG0351	-0.135444	-0.188078	-0.0846618
2_DNTAG0352	2	YIL123W	SIM1	DNTAG0352	-0.0993999	-0.201454	-0.00409018
2_DNTAG0353	2	YOR265W	RBL2	DNTAG0353	0.12439	0.138909	0.109723
2_DNTAG0355	2	YER016W	BIM1	DNTAG0355	-0.0831086	-0.0576735	-0.109
2_DNTAG0357	2	YMR138W	CIN4	DNTAG0357	0.00649218	0.111793	-0.107104
2_DNTAG0358	2	YPL253C	VIK1	DNTAG0358	-0.0248818	0.0116882	-0.062403
2_DNTAG0359	2	YPL241C	CIN2	DNTAG0359	-0.149829	-0.0683922	-0.236139
2_DNTAG0360	2	YDR424C	DYN2	DNTAG0360	0.0423447	0.172559	-0.100798
2_DNTAG0361	2	YOR033C	EXO1	DNTAG0361	-0.0747263	-0.158761	0.00468163
2_DNTAG0362	2	YDR097C	MSH6	DNTAG0362	-0.132884	-0.0978464	-0.168793
2_DNTAG0363	2	YBR272C	HSM3	DNTAG0363	0.033146	-0.0812659	0.139147
2_DNTAG0364	2	YGR144W	THI4	DNTAG0364	0.249008	-0.255591	0.62212
2_DNTAG0365	2	YLR190W	MMR1	DNTAG0365	0.404028	0.461339	0.344346
2_DNTAG0366	2	YMR072W	ABF2	DNTAG0366	-0.18254	-0.098414	-0.271877
2_DNTAG0367	2	YNL213C	RRG9	DNTAG0367	-0.198606	-0.0557266	-0.357208
2_DNTAG0368	2	YML058W	SML1	DNTAG0368	-0.0378083	-0.190973	0.100645
2_DNTAG0371	2	YGL021W	ALK1	DNTAG0371	0.00580108	0.0300264	-0.018838
2_DNTAG0374	2	YMR294W	JNM1	DNTAG0374	-0.075936	0.188527	-0.400009
2_DNTAG0375	2	YMR078C	CTF18	DNTAG0375	0.318973	0.366467	0.269862
2_DNTAG0376	2	YHR191C	CTF8	DNTAG0376	0.263468	0.171951	0.349524
2_DNTAG0377	2	YCL016C	DCC1	DNTAG0377	0.653798	-0.24594	1.20373
2_DNTAG0378	2	YOL115W	PAP2	DNTAG0378	-0.00685057	-0.408326	0.306879
2_DNTAG0379	2	YML034W	SRC1	DNTAG0379	0.126473	-0.0543778	0.287158
2_DNTAG0380	2	YMR190C	SGS1	DNTAG0380	0.424695	0.46012	0.388379
2_DNTAG0381	2	YLR226W	BUR2	DNTAG0381	-0.644882	-0.769872	-0.529862
2_DNTAG0382	2	YEL061C	CIN8	DNTAG0382	0.263639	0.328249	0.195999
2_DNTAG0383	2	YOR073W	SGO1	DNTAG0383	0.598694	0.552466	0.643487
2_DNTAG0385	2	YAL047C	SPC72	DNTAG0385	0.408237	0.595411	0.193108
2_DNTAG0386	2	YML124C	TUB3	DNTAG0386	-0.02213	-0.0154924	-0.0287983
2_DNTAG0387	2	YMR055C	BUB2	DNTAG0387	0.108609	0.260413	-0.0610677
2_DNTAG0388	2	YOR026W	BUB3	DNTAG0388	0.875372	0.673492	1.05244
2_DNTAG0389	2	YDR517W	GRH1	DNTAG0389	-0.0478948	-0.0201904	-0.0761418
2_DNTAG0390	2	YNL164C	IBD2	DNTAG0390	-0.12974	-0.0814475	-0.179705
2_DNTAG0391	2	YJL030W	MAD2	DNTAG0391	0.354992	0.461584	0.239891
2_DNTAG0394	2	YNL116W	DMA2	DNTAG0394	-0.0492493	0.0204313	-0.122467
2_DNTAG0395	2	YGL086W	MAD1	DNTAG0395	0.0800024	0.0585434	0.101147
2_DNTAG0397	2	YCL029C	BIK1	DNTAG0397	0.00327498	-0.09622	0.0963488
2_DNTAG0398	2	YGL216W	KIP3	DNTAG0398	-0.222767	-0.15997	-0.288423
2_DNTAG0399	2	YJR091C	JSN1	DNTAG0399	0.175213	0.114189	0.23376
2_DNTAG0400	2	YIL040W	APQ12	DNTAG0400	0.0154883	0.0939165	-0.0674497
2_DNTAG0401	2	YDR139C	RUB1	DNTAG0401	-0.063816	0.0349578	-0.169853
2_DNTAG0402	2	YDR289C	RTT103	DNTAG0402	0.00580255	-0.0852156	0.0914177
2_DNTAG0404	2	YHR154W	RTT107	DNTAG0404	0.201912	0.326889	0.0650734
2_DNTAG0405	2	YLL002W	RTT109	DNTAG0405	0.00662306	0.235893	-0.266096
2_DNTAG0406	2	YBR158W	AMN1	DNTAG0406	-0.145693	0.0633856	-0.390292
2_DNTAG0407	2	YDR255C	RMD5	DNTAG0407	0.107194	-0.0290844	0.231702
2_DNTAG0409	2	YGL197W	MDS3	DNTAG0409	0.18121	0.116122	0.243487
2_DNTAG0411	2	YDR451C	YHP1	DNTAG0411	-0.100317	-0.0101367	-0.196513
2_DNTAG0412	2	YML027W	YOX1	DNTAG0412	-0.460522	-0.27442	-0.674235
2_DNTAG0413	2	YPL269W	KAR9	DNTAG0413	0.0403621	-0.0227044	0.100787
2_DNTAG0414	2	YOR269W	PAC1	DNTAG0414	-0.0880176	-0.0412731	-0.136328
2_DNTAG0415	2	YMR299C	DYN3	DNTAG0415	-0.0439084	0.0731731	-0.171337
2_DNTAG0416	2	YPL155C	KIP2	DNTAG0416	0.272995	0.508119	-0.00805583
2_DNTAG0417	2	YDR488C	PAC11	DNTAG0417	-0.330092	-0.304774	-0.355863
2_DNTAG0418	2	YDR150W	NUM1	DNTAG0418	-0.0850598	0.0805353	-0.272157
2_DNTAG0419	2	YHR086W	NAM8	DNTAG0419	-0.0607124	-0.202826	0.0686489
2_DNTAG0420	2	YGR129W	SYF2	DNTAG0420	-0.0296575	0.115268	-0.190784
2_DNTAG0422	2	YOR247W	SRL1	DNTAG0422	0.0208881	-0.0100281	0.0511557
2_DNTAG0423	2	YLR082C	SRL2	DNTAG0423	0.124808	0.0568448	0.189714
2_DNTAG0424	2	YKR091W	SRL3	DNTAG0424	-0.151957	-0.126302	-0.178077
2_DNTAG0426	2	YJR035W	RAD26	DNTAG0426	-0.0372009	-0.250018	0.148221
2_DNTAG0427	2	YMR201C	RAD14	DNTAG0427	0.0752918	-0.141018	0.263358
2_DNTAG0429	2	YJR052W	RAD7	DNTAG0429	0.0380512	0.102829	-0.0297724
2_DNTAG0431	2	YEL037C	RAD23	DNTAG0431	-0.326095	-0.370049	-0.283441
2_DNTAG0433	2	YGR170W	PSD2	DNTAG0433	-0.0322291	0.157728	-0.251045
2_DNTAG0435	2	YHR014W	SPO13	DNTAG0435	0.158596	0.273397	0.033865
2_DNTAG0437	2	YOR349W	CIN1	DNTAG0437	-0.0634582	-0.0846952	-0.0425293
2_DNTAG0438	2	YNL148C	ALF1	DNTAG0438	0.364244	-0.196678	0.76711
2_DNTAG0439	2	YBR057C	MUM2	DNTAG0439	-0.163493	-0.143415	-0.183855
2_DNTAG0440	2	YGR161C	RTS3	DNTAG0440	-0.0673719	-0.0897622	-0.0453238
2_DNTAG0441	2	YDR481C	PHO8	DNTAG0441	0.119505	0.116799	0.122206
2_DNTAG0442	2	YDL236W	PHO13	DNTAG0442	0.0467629	-0.256828	0.297441
2_DNTAG0444	2	YER123W	YCK3	DNTAG0444	-0.00534033	0.0336469	-0.0454105
2_DNTAG0445	2	YJL141C	YAK1	DNTAG0445	-0.0567668	0.106284	-0.240622
2_DNTAG0446	2	YMR104C	YPK2	DNTAG0446	0.15863	-0.0701882	0.356076
2_DNTAG0447	2	YGR188C	BUB1	DNTAG0447	0.370905	0.177191	0.541661
2_DNTAG0448	2	YBR156C	SLI15	DNTAG0448	0.142676	0.0414001	0.237306
2_DNTAG0451	2	YDR507C	GIN4	DNTAG0451	0.0940152	-0.0280789	0.206578
2_DNTAG0452	2	YKL101W	HSL1	DNTAG0452	0.040779	0.171666	-0.103179
2_DNTAG0453	2	YJL106W	IME2	DNTAG0453	-0.189733	-0.0358376	-0.362027
2_DNTAG0454	2	YCL024W	KCC4	DNTAG0454	0.0144696	-0.0202882	0.0484096
2_DNTAG0455	2	YCR091W	KIN82	DNTAG0455	0.0531266	0.0615071	0.0446971
2_DNTAG0456	2	YER129W	SAK1	DNTAG0456	0.0671575	0.0706829	0.0636234
2_DNTAG0457	2	YFL033C	RIM15	DNTAG0457	-0.170697	0.012006	-0.379938
2_DNTAG0458	2	YDR247W	VHS1	DNTAG0458	-0.0669055	-0.0293436	-0.105472
2_DNTAG0459	2	YIL035C	CKA1	DNTAG0459	0.0309491	-0.998688	0.625657
2_DNTAG0461	2	YGL019W	CKB1	DNTAG0461	-0.124057	-0.242303	-0.0147727
2_DNTAG0462	2	YOR039W	CKB2	DNTAG0462	-0.0751392	0.0106223	-0.166323
2_DNTAG0463	2	YGR092W	DBF2	DNTAG0463	0.327324	0.228069	0.420187
2_DNTAG0464	2	YPR111W	DBF20	DNTAG0464	-0.0548086	-0.193519	0.0717271
2_DNTAG0465	2	YKL048C	ELM1	DNTAG0465	0.363228	0.433084	0.289815
2_DNTAG0466	2	YOR351C	MEK1	DNTAG0466	-0.0201667	0.152515	-0.216364
2_DNTAG0467	2	YIL095W	PRK1	DNTAG0467	0.203729	0.292698	0.108911
2_DNTAG0468	2	YGL158W	RCK1	DNTAG0468	0.053558	0.0308264	0.0759369
2_DNTAG0469	2	YLR248W	RCK2	DNTAG0469	0.0967439	-0.0711121	0.24709
2_DNTAG0470	2	YGL190C	CDC55	DNTAG0470	-0.204309	-0.0951777	-0.322377
2_DNTAG0471	2	YDL134C	PPH21	DNTAG0471	0.117895	0.0894124	0.145827
2_DNTAG0472	2	YDL188C	PPH22	DNTAG0472	-0.0225998	-0.0901861	0.0419614
2_DNTAG0473	2	YOR014W	RTS1	DNTAG0473	0.0325756	0.0364746	0.028666
2_DNTAG0474	2	YGR270W	YTA7	DNTAG0474	-0.0361566	-0.118566	0.041799
2_DNTAG0475	2	YMR304W	UBP15	DNTAG0475	-0.151396	0.0194871	-0.345274
2_DNTAG0476	2	YER144C	UBP5	DNTAG0476	0.307815	0.247665	0.365557
2_DNTAG0477	2	YGR285C	ZUO1	DNTAG0477	0.0108153	0.0706611	-0.051621
2_DNTAG0481	2	YHR111W	UBA4	DNTAG0481	-0.529476	-0.505606	-0.553748
2_DNTAG0482	2	YLR306W	UBC12	DNTAG0482	-0.213017	-0.156786	-0.271529
2_DNTAG0483	2	YDR092W	UBC13	DNTAG0483	0.110492	-0.686659	0.620963
2_DNTAG0484	2	YEL012W	UBC8	DNTAG0484	-0.016179	0.050439	-0.0860227
2_DNTAG0485	2	YGR184C	UBR1	DNTAG0485	0.0781026	0.139855	0.0135883
2_DNTAG0486	2	YPR066W	UBA3	DNTAG0486	-0.120313	-0.153614	-0.0877639
2_DNTAG0487	2	YPL003W	ULA1	DNTAG0487	-0.0295076	0.0593286	-0.124175
2_DNTAG0488	2	YMR154C	RIM13	DNTAG0488	0.125126	0.0322726	0.212362
2_DNTAG0489	2	YHR134W	WSS1	DNTAG0489	0.217156	0.402024	0.00506904
2_DNTAG0490	2	YDR409W	SIZ1	DNTAG0490	0.0270542	-0.0216249	0.0741442
2_DNTAG0491	2	YOR156C	NFI1	DNTAG0491	-0.253158	-0.0541671	-0.484054
2_DNTAG0493	2	YDR144C	MKC7	DNTAG0493	-0.104507	-0.141199	-0.0687258
2_DNTAG0494	2	YKL185W	ASH1	DNTAG0494	-0.188077	-0.147215	-0.23013
2_DNTAG0495	2	YIL131C	FKH1	DNTAG0495	-0.0614885	0.114939	-0.262537
2_DNTAG0496	2	YNL068C	FKH2	DNTAG0496	-0.309549	-0.315616	-0.303508
2_DNTAG0497	2	YLL017W	YLL017W	DNTAG0497	-0.194299	-0.167697	-0.221401
2_DNTAG0498	2	YOR101W	RAS1	DNTAG0498	0.0291576	0.17359	-0.13136
2_DNTAG0499	2	YOL110W	SHR5	DNTAG0499	0.115258	0.112836	0.117676
2_DNTAG0500	2	YIL122W	POG1	DNTAG0500	0.132447	0.210208	0.0502552
2_DNTAG0501	2	YMR100W	MUB1	DNTAG0501	0.121433	0.180831	0.0594838
2_DNTAG0502	2	YDL056W	MBP1	DNTAG0502	-0.0215874	0.035995	-0.081564
2_DNTAG0503	2	YCR020W-B	HTL1	DNTAG0503	-0.172743	-0.186515	-0.159102
2_DNTAG0504	2	YDR363W-A	SEM1	DNTAG0504	-0.406707	-0.303798	-0.517525
2_DNTAG0505	2	YBR133C	HSL7	DNTAG0505	0.0770234	0.175247	-0.0283791
2_DNTAG0506	2	YBL064C	PRX1	DNTAG0506	0.154222	-0.0619795	0.342206
2_DNTAG0507	2	YDR453C	TSA2	DNTAG0507	0.0205	0.148353	-0.119795
2_DNTAG0508	2	YNL197C	WHI3	DNTAG0508	0.0582705	0.0287338	0.0872146
2_DNTAG0509	2	YDL224C	WHI4	DNTAG0509	-0.443566	-0.440559	-0.446579
2_DNTAG0510	2	YMR199W	CLN1	DNTAG0510	0.00792092	-0.0153525	0.0308248
2_DNTAG0512	2	YPL256C	CLN2	DNTAG0512	0.139073	-0.0192148	0.281698
2_DNTAG0513	2	YLR003C	CMS1	DNTAG0513	-0.199882	-0.256374	-0.145519
2_DNTAG0514	2	YAL024C	LTE1	DNTAG0514	0.0288119	0.0847386	-0.0293705
2_DNTAG0515	2	YHR152W	SPO12	DNTAG0515	-0.0961994	-0.0412975	-0.153273
2_DNTAG0516	2	YBR186W	PCH2	DNTAG0516	-0.0723358	-0.0771233	-0.067564
2_DNTAG0517	2	YPL139C	UME1	DNTAG0517	0.117709	0.0982408	0.136918
2_DNTAG0518	2	YOR230W	WTM1	DNTAG0518	-0.0996817	-0.110871	-0.0885782
2_DNTAG0520	2	YNL078W	NIS1	DNTAG0520	-0.12861	-0.220438	-0.0422794
2_DNTAG0521	2	YBL008W	HIR1	DNTAG0521	-0.101808	-0.0679479	-0.136482
2_DNTAG0522	2	YOR038C	HIR2	DNTAG0522	-0.0204246	-0.0818768	0.0385166
2_DNTAG0523	2	YOL012C	HTZ1	DNTAG0523	0.149158	0.216885	0.0780929
2_DNTAG0524	2	YOL006C	TOP1	DNTAG0524	-0.0219025	-0.241647	0.168754
2_DNTAG0525	2	YPR023C	EAF3	DNTAG0525	-0.101004	-0.201771	-0.00681827
2_DNTAG0526	2	YCR094W	CDC50	DNTAG0526	0.181091	0.296656	0.0554572
2_DNTAG0527	2	YOR113W	AZF1	DNTAG0527	0.0890791	-0.0290596	0.198272
2_DNTAG0528	2	YNL021W	HDA1	DNTAG0528	0.0349738	0.0814184	-0.0130159
2_DNTAG0529	2	YPR068C	HOS1	DNTAG0529	-0.0775482	-0.133282	-0.0238878
2_DNTAG0530	2	YJL168C	SET2	DNTAG0530	0.328513	0.288364	0.367576
2_DNTAG0531	2	YGL194C	HOS2	DNTAG0531	-0.110946	-0.15753	-0.0658193
2_DNTAG0533	2	YPL022W	RAD1	DNTAG0533	-0.24768	-0.248061	-0.247299
2_DNTAG0534	2	YML095C	RAD10	DNTAG0534	0.043713	0.0571755	0.0301238
2_DNTAG0535	2	YML058W-A	HUG1	DNTAG0535	-0.253961	-0.123872	-0.396952
2_DNTAG0536	2	YBL088C	TEL1	DNTAG0536	0.00170801	-0.167369	0.153033
2_DNTAG0537	2	YER062C	GPP2	DNTAG0537	-0.234752	-0.0328864	-0.46953
2_DNTAG0538	2	YIL053W	GPP1	DNTAG0538	-0.166947	-0.0191449	-0.331638
2_DNTAG0539	2	YHR206W	SKN7	DNTAG0539	-0.192316	-0.0235439	-0.383481
2_DNTAG0540	2	YNL099C	OCA1	DNTAG0540	0.054742	-0.302267	0.340698
2_DNTAG0541	2	YNR047W	FPK1	DNTAG0541	-0.2341	-0.0684848	-0.421223
2_DNTAG0542	2	YDR014W	RAD61	DNTAG0542	-0.264907	-0.231936	-0.298648
2_DNTAG0543	2	YIL101C	XBP1	DNTAG0543	0.0173545	0.000461306	0.0340521
2_DNTAG0544	2	YLL039C	UBI4	DNTAG0544	-0.301857	-0.245804	-0.360177
2_DNTAG0545	2	YOR043W	WHI2	DNTAG0545	0.0397936	0.170826	-0.10434
2_DNTAG0546	2	YPR017C	DSS4	DNTAG0546	-0.292705	-0.426397	-0.170358
2_DNTAG0547	2	YNL299W	TRF5	DNTAG0547	0.18493	0.266038	0.0989902
2_DNTAG0548	2	YML016C	PPZ1	DNTAG0548	-0.168326	-0.0608696	-0.284435
2_DNTAG0551	2	YOR177C	MPC54	DNTAG0551	-0.0722445	0.0772669	-0.239061
2_DNTAG0552	2	YDR096W	GIS1	DNTAG0552	-0.0424486	0.019085	-0.106724
2_DNTAG0553	2	YER180C	ISC10	DNTAG0553	0.0828372	-0.0196996	0.178567
2_DNTAG0554	2	YLR227C	ADY4	DNTAG0554	0.0194927	0.0257273	0.0132312
2_DNTAG0555	2	YDR512C	EMI1	DNTAG0555	0.244611	0.165191	0.319887
2_DNTAG0556	2	YGL170C	SPO74	DNTAG0556	-0.176622	-0.205487	-0.148322
2_DNTAG0557	2	YDL013W	SLX5	DNTAG0557	0.35926	0.426509	0.288722
2_DNTAG0558	2	YER044C-A	MEI4	DNTAG0558	-0.0732945	-0.0136735	-0.135486
2_DNTAG0559	2	YGL033W	HOP2	DNTAG0559	0.175067	0.107297	0.239795
2_DNTAG0560	2	YOL104C	NDJ1	DNTAG0560	-0.0955444	-0.131214	-0.0607359
2_DNTAG0561	2	YLR263W	RED1	DNTAG0561	0.560438	-0.565982	1.18519
2_DNTAG0563	2	YLR394W	CST9	DNTAG0563	0.0720211	0.00698591	0.134251
2_DNTAG0564	2	YDR206W	EBS1	DNTAG0564	-0.0249643	0.0212823	-0.0727426
2_DNTAG0565	2	YLR233C	EST1	DNTAG0565	0.0973936	0.226048	-0.0438668
2_DNTAG0566	2	YIL009C-A	EST3	DNTAG0566	0.00827347	0.069563	-0.0557358
2_DNTAG0567	2	YLR453C	RIF2	DNTAG0567	-0.143724	-0.192988	-0.0960871
2_DNTAG0568	2	YLR318W	EST2	DNTAG0568	0.70088		0.70088
2_DNTAG0569	2	YBL032W	HEK2	DNTAG0569	-0.074834	0.00537105	-0.159762
2_DNTAG0570	2	YDR545W	YRF1-1	DNTAG0570	0.0269798	-0.0239607	0.0761827
2_DNTAG0571	2	YER190W	YRF1-2	DNTAG0571	0.116614	0.18503	0.0447917
2_DNTAG0573	2	YNL339C	YRF1-6	DNTAG0573	-0.0946732	-0.235558	0.0336692
2_DNTAG0574	2	YDR004W	RAD57	DNTAG0574	0.418694	0.532778	0.294808
2_DNTAG0575	2	YDL059C	RAD59	DNTAG0575	0.0626839	-0.028856	0.148761
2_DNTAG0576	2	YER095W	RAD51	DNTAG0576	0.470013	0.55501	0.379694
2_DNTAG0577	2	YML032C	RAD52	DNTAG0577	0.642118	0.517909	0.756476
2_DNTAG0579	2	YLR403W	SFP1	DNTAG0579	-0.105096	-0.0584059	-0.153347
2_DNTAG0580	2	YNL153C	GIM3	DNTAG0580	0.234335	0.190097	0.277256
2_DNTAG0581	2	YEL003W	GIM4	DNTAG0581	0.713219	0.96985	0.400844
2_DNTAG0582	2	YML094W	GIM5	DNTAG0582	0.811055	0.663365	0.94502
2_DNTAG0583	2	YGR078C	PAC10	DNTAG0583	0.444897	0.476651	0.412429
2_DNTAG0584	2	YHR200W	RPN10	DNTAG0584	-0.0224696	-0.166263	0.108282
2_DNTAG0586	2	YLR097C	HRT3	DNTAG0586	-0.0516559	-0.0687048	-0.0348061
2_DNTAG0589	2	YLR102C	APC9	DNTAG0589	0.206254	0.465678	-0.110275
2_DNTAG0590	2	YFR036W	CDC26	DNTAG0590	-0.0194101	-0.199178	0.140419
2_DNTAG0593	2	YML088W	UFO1	DNTAG0593	-0.116538	0.0182289	-0.265203
2_DNTAG0594	2	YGL087C	MMS2	DNTAG0594	-0.0177418	-0.00802879	-0.0275207
2_DNTAG0595	2	YGL058W	RAD6	DNTAG0595	-1.82436	-3.07938	-1.16351
2_DNTAG0596	2	YDL190C	UFD2	DNTAG0596	0.0771028	-0.00318926	0.153161
2_DNTAG0676	2	YGL078C	DBP3	DNTAG0676	-0.155726	-0.0548109	-0.264234
2_DNTAG0677	2	YKR024C	DBP7	DNTAG0677	0.34022	0.561123	0.0792671
2_DNTAG0678	2	YGL173C	XRN1	DNTAG0678	0.0422404	-0.00945015	0.0921428
2_DNTAG0679	2	YJL209W	CBP1	DNTAG0679	-0.120805	0.137318	-0.435396
2_DNTAG0680	2	YLR256W	HAP1	DNTAG0680	-0.321982	-0.307862	-0.336242
2_DNTAG0681	2	YDR071C	PAA1	DNTAG0681	0.147941	0.295875	-0.0169129
2_DNTAG0682	2	YER047C	SAP1	DNTAG0682	0.104904	0.225806	-0.0270656
2_DNTAG0685	2	YMR019W	STB4	DNTAG0685	-0.320402	-0.0859905	-0.600432
2_DNTAG0686	2	YOL042W	NGL1	DNTAG0686	-0.0434128	-0.0115991	-0.075944
2_DNTAG0687	2	YNR073C	YNR073C	DNTAG0687	0.0519667	-0.0441086	0.142042
2_DNTAG0689	2	YPL165C	SET6	DNTAG0689	0.0529931	-0.0552483	0.153677
2_DNTAG0690	2	YKL072W	STB6	DNTAG0690	0.0541083	-0.0361586	0.139058
2_DNTAG0691	2	YER130C	COM2	DNTAG0691	-0.21302	-0.202307	-0.223813
2_DNTAG0692	2	YER184C	TOG1	DNTAG0692	-0.0944413	-0.0174997	-0.175719
2_DNTAG0693	2	YJL057C	IKS1	DNTAG0693	0.00950626	-0.0623615	0.0779631
2_DNTAG0694	2	YJL103C	GSM1	DNTAG0694	0.122297	-0.669474	0.630589
2_DNTAG0695	2	YJL206C	YJL206C	DNTAG0695	0.112182	-0.65781	0.611535
2_DNTAG0696	2	YKL222C	YKL222C	DNTAG0696	0.16024	-0.194394	0.444673
2_DNTAG0697	2	YPL230W	USV1	DNTAG0697	0.0610545	0.104694	0.0160531
2_DNTAG0698	2	YPR196W	YPR196W	DNTAG0698	-0.161076	-0.259154	-0.0692434
2_DNTAG0699	2	YML017W	PSP2	DNTAG0699	-0.0783317	0.000215235	-0.161403
2_DNTAG0700	2	YBR194W	AIM4	DNTAG0700	-0.305079	-0.277405	-0.333294
2_DNTAG0701	2	YDR169C	STB3	DNTAG0701	-0.250856	-0.364625	-0.145407
2_DNTAG0702	2	YER139C	RTR1	DNTAG0702	0.463484	0.389773	0.53361
2_DNTAG0703	2	YIL137C	TMA108	DNTAG0703	0.0675043	0.0167171	0.116564
2_DNTAG0704	2	YPR115W	RGC1	DNTAG0704	0.0116598	0.0487091	-0.0263659
2_DNTAG0705	2	YGL221C	NIF3	DNTAG0705	0.0208745	0.1584	-0.131155
2_DNTAG0707	2	YDL053C	PBP4	DNTAG0707	0.164901	0.144643	0.184879
2_DNTAG0708	2	YHR207C	SET5	DNTAG0708	0.0138663	-0.137069	0.150495
2_DNTAG0709	2	YBR150C	TBS1	DNTAG0709	-0.00455608	-0.0531075	0.0424144
2_DNTAG0710	2	YBL054W	TOD6	DNTAG0710	0.0439523	0.0439523
2_DNTAG0711	2	YBR239C	ERT1	DNTAG0711	-0.331072	-0.215957	-0.456174
2_DNTAG0712	2	YJR119C	JHD2	DNTAG0712	0.145881	0.140754	0.150989
2_DNTAG0713	2	YKR064W	OAF3	DNTAG0713	-0.0580702	-0.272745	0.128759
2_DNTAG0714	2	YLR327C	TMA10	DNTAG0714	-0.230311	-0.271487	-0.190278
2_DNTAG0716	2	YHL018W	YHL018W	DNTAG0716	-0.0129948	0.0532922	-0.0824748
2_DNTAG0717	2	YKL070W	YKL070W	DNTAG0717	-0.00427229	-0.147913	0.126353
2_DNTAG0718	2	YPR125W	YLH47	DNTAG0718	0.0979352	0.00875877	0.181919
2_DNTAG0720	2	YDR026C	NSI1	DNTAG0720	0.0154634	0.143999	-0.125654
2_DNTAG0722	2	YDL070W	BDF2	DNTAG0722	0.0900749	0.0681994	0.111624
2_DNTAG0723	2	YNL215W	IES2	DNTAG0723	-0.059177	-0.156076	0.0316217
2_DNTAG0724	2	YOR189W	IES4	DNTAG0724	0.0925691	-0.347555	0.429343
2_DNTAG0725	2	YER092W	IES5	DNTAG0725	-0.167671	-0.288606	-0.0560941
2_DNTAG0726	2	YMR075W	RCO1	DNTAG0726	-0.409811	-0.550504	-0.281628
2_DNTAG0727	2	YDR257C	RKM4	DNTAG0727	0.0463441	-0.0348622	0.123222
2_DNTAG0728	2	YGR071C	ENV11	DNTAG0728	0.0940094	0.150511	0.0352046
2_DNTAG0729	2	YIL130W	ASG1	DNTAG0729	-0.00242751	0.0328535	-0.038593
2_DNTAG0730	2	YLR278C	YLR278C	DNTAG0730	0.100001	0.00722459	0.18717
2_DNTAG0731	2	YML081W	TDA9	DNTAG0731	0.0181204	0.104178	-0.0733977
2_DNTAG0732	2	YEL018W	EAF5	DNTAG0732	0.215831	0.527888	-0.182904
2_DNTAG0733	2	YJR082C	EAF6	DNTAG0733	-0.170235	-0.284455	-0.0643995
2_DNTAG0734	2	YDR482C	CWC21	DNTAG0734	0.278634	0.184487	0.367011
2_DNTAG0735	2	YPL064C	CWC27	DNTAG0735	-0.0401832	-0.1329	0.0469333
2_DNTAG0736	2	YGR100W	MDR1	DNTAG0736	-0.0768015	0.0597972	-0.227699
2_DNTAG0737	2	YNL175C	NOP13	DNTAG0737	-0.0690744	0.0372047	-0.18381
2_DNTAG0738	2	YER041W	YEN1	DNTAG0738	0.278262	0.355555	0.196592
2_DNTAG0739	2	YNL023C	FAP1	DNTAG0739	0.0171235	-0.0190049	0.0523693
2_DNTAG0740	2	YJR127C	RSF2	DNTAG0740	0.0691137	0.0242335	0.11264
2_DNTAG0741	2	YLL054C	YLL054C	DNTAG0741	0.218704	0.0793818	0.345749
2_DNTAG0742	2	YLR436C	ECM30	DNTAG0742	0.12437	0.07685	0.170374
2_DNTAG0743	2	YMR176W	ECM5	DNTAG0743	0.155207	0.194646	0.114659
2_DNTAG0744	2	YKR019C	IRS4	DNTAG0744	0.0855041	0.0176164	0.15034
2_DNTAG0745	2	YBR065C	ECM2	DNTAG0745	0.0217822	0.0749729	-0.033445
2_DNTAG0747	2	YBR009C	HHF1	DNTAG0747	-0.0545047	0.00492108	-0.116484
2_DNTAG0748	2	YNL030W	HHF2	DNTAG0748	-0.143269	0.00352284	-0.306706
2_DNTAG0750	2	YDR225W	HTA1	DNTAG0750	-0.166201	-0.229288	-0.105757
2_DNTAG0751	2	YBL003C	HTA2	DNTAG0751	0.0955527	0.012241	0.174315
2_DNTAG0752	2	YBL002W	HTB2	DNTAG0752	-0.0136658	-0.0374022	0.00968641
2_DNTAG0753	2	YBR010W	HHT1	DNTAG0753	-0.24709	-0.239295	-0.254927
2_DNTAG0755	2	YDR073W	SNF11	DNTAG0755	-0.0871857	-0.164421	-0.0138762
2_DNTAG0756	2	YNR023W	SNF12	DNTAG0756	0.131798	0.191418	0.0696071
2_DNTAG0758	2	YBR289W	SNF5	DNTAG0758	0.0825344	0.172357	-0.0132537
2_DNTAG0759	2	YHL025W	SNF6	DNTAG0759	0.313936	0.230049	0.393213
2_DNTAG0761	2	YDR334W	SWR1	DNTAG0761	-0.0154398	-0.0699729	0.0371069
2_DNTAG0762	2	YFL013C	IES1	DNTAG0762	0.0677741	0.0511285	0.0842298
2_DNTAG0763	2	YLR052W	IES3	DNTAG0763	0.0016985	-0.00476051	0.00812873
2_DNTAG0764	2	YDL002C	NHP10	DNTAG0764	-0.0699641	-0.0670359	-0.0728983
2_DNTAG0766	2	YLR385C	SWC7	DNTAG0766	-0.0399225	-0.110972	0.0277919
2_DNTAG0768	2	YMR044W	IOC4	DNTAG0768	-0.0375493	0.13114	-0.228607
2_DNTAG0769	2	YER164W	CHD1	DNTAG0769	0.217244	0.288386	0.142411
2_DNTAG0770	2	YPL129W	TAF14	DNTAG0770	0.833128	0.705741	0.950174
2_DNTAG0771	2	YJL127C	SPT10	DNTAG0771	-0.0818474	0.111455	-0.305117
2_DNTAG0772	2	YGL133W	ITC1	DNTAG0772	0.00608823	-0.0900105	0.0961836
2_DNTAG0774	2	YAL011W	SWC3	DNTAG0774	-0.125162	-0.028374	-0.228914
2_DNTAG0775	2	YBR112C	CYC8	DNTAG0775	-0.000566134	-0.0111908	0.00998089
2_DNTAG0776	2	YDL076C	RXT3	DNTAG0776	0.305963	0.285821	0.325826
2_DNTAG0777	2	YOL068C	HST1	DNTAG0777	0.145819	0.128749	0.16269
2_DNTAG0778	2	YOR279C	RFM1	DNTAG0778	0.153975	0.0763995	0.227591
2_DNTAG0779	2	YDR439W	LRS4	DNTAG0779	0.149496	0.219537	0.0758796
2_DNTAG0781	2	YDR363W	ESC2	DNTAG0781	0.161825	0.234245	0.0855778
2_DNTAG0782	2	YDL197C	ASF2	DNTAG0782	-0.124418	-0.05251	-0.200099
2_DNTAG0783	2	YKR101W	SIR1	DNTAG0783	-0.0839189	-0.0366336	-0.132807
2_DNTAG0784	2	YMR127C	SAS2	DNTAG0784	-0.509348	-0.605335	-0.419352
2_DNTAG0785	2	YLL022C	HIF1	DNTAG0785	-0.203845	-0.130844	-0.280737
2_DNTAG0786	2	YPL015C	HST2	DNTAG0786	-0.105523	0.101871	-0.347819
2_DNTAG0787	2	YDR191W	HST4	DNTAG0787	0.197002	0.00937523	0.363013
2_DNTAG0788	2	YOR025W	HST3	DNTAG0788	0.127897	0.173195	0.0811306
2_DNTAG0790	2	YBL052C	SAS3	DNTAG0790	-0.186699	-0.224643	-0.149728
2_DNTAG0791	2	YNL330C	RPD3	DNTAG0791	0.592697	0.532788	0.650217
2_DNTAG0792	2	YMR263W	SAP30	DNTAG0792	0.557958	0.488102	0.624587
2_DNTAG0794	2	YBR275C	RIF1	DNTAG0794	0.0593916	0.0918077	0.0262303
2_DNTAG0795	2	YAR003W	SWD1	DNTAG0795	0.163338	0.192462	0.133615
2_DNTAG0796	2	YDR310C	SUM1	DNTAG0796	-0.0640795	0.0950994	-0.243025
2_DNTAG0797	2	YDL074C	BRE1	DNTAG0797	-2.0829	-2.24837	-1.93448
2_DNTAG0798	2	YIL084C	SDS3	DNTAG0798	0.574166	0.545074	0.602683
2_DNTAG0799	2	YLR270W	DCS1	DNTAG0799	0.0241136	-0.0992875	0.137786
2_DNTAG0800	2	YGL222C	EDC1	DNTAG0800	-0.0796233	-0.145641	-0.0164946
2_DNTAG0801	2	YER035W	EDC2	DNTAG0801	-0.0558465	0.0321802	-0.149595
2_DNTAG0803	2	YEL015W	EDC3	DNTAG0803	-0.169953	-0.0805185	-0.2653
2_DNTAG0804	2	YGR249W	MGA1	DNTAG0804	0.0787036	0.201577	-0.0556169
2_DNTAG0805	2	YKL038W	RGT1	DNTAG0805	-0.0116497	-0.262063	0.20166
2_DNTAG0806	2	YPR134W	MSS18	DNTAG0806	-0.289096	-0.157082	-0.434418
2_DNTAG0807	2	YIR021W	MRS1	DNTAG0807	-0.296938	-0.239194	-0.357089
2_DNTAG0808	2	YHL038C	CBP2	DNTAG0808	-0.0910373	-0.204604	0.0142379
2_DNTAG0811	2	YGL066W	SGF73	DNTAG0811	0.334114	0.458277	0.19825
2_DNTAG0812	2	YDR448W	ADA2	DNTAG0812	0.198855	0.239406	0.157132
2_DNTAG0813	2	YLR055C	SPT8	DNTAG0813	0.182388	-0.275748	0.52957
2_DNTAG0814	2	YDR176W	NGG1	DNTAG0814	0.290439	0.303441	0.277319
2_DNTAG0816	2	YPL116W	HOS3	DNTAG0816	0.0811035	-0.0731246	0.220425
2_DNTAG0817	2	YMR053C	STB2	DNTAG0817	0.210123	0.258317	0.160264
2_DNTAG0818	2	YNL255C	GIS2	DNTAG0818	-0.0864828	-0.0985324	-0.0745329
2_DNTAG0819	2	YGL252C	RTG2	DNTAG0819	-0.136519	-0.155411	-0.117871
2_DNTAG0820	2	YBR066C	NRG2	DNTAG0820	-0.177727	-0.147699	-0.208393
2_DNTAG0822	2	YBR212W	NGR1	DNTAG0822	0.216392	0.282938	0.146627
2_DNTAG0823	2	YOR076C	SKI7	DNTAG0823	-0.221357	-0.179389	-0.264581
2_DNTAG0824	2	YPR189W	SKI3	DNTAG0824	-0.302084	-0.4209	-0.192313
2_DNTAG0825	2	YMR080C	NAM7	DNTAG0825	0.0790314	-0.0325543	0.182603
2_DNTAG0826	2	YGR072W	UPF3	DNTAG0826	-0.184954	-0.15758	-0.212858
2_DNTAG0827	2	YLR136C	TIS11	DNTAG0827	-0.0944609	-0.0302108	-0.161706
2_DNTAG0828	2	YHR077C	NMD2	DNTAG0828	0.0782738	-0.0544609	0.199819
2_DNTAG0829	2	YPR042C	PUF2	DNTAG0829	-0.152448	-0.257607	-0.0544358
2_DNTAG0830	2	YLL013C	PUF3	DNTAG0830	-0.119251	-0.141269	-0.0975625
2_DNTAG0831	2	YLR363C	NMD4	DNTAG0831	-0.210918	-0.413671	-0.0331803
2_DNTAG0832	2	YNL016W	PUB1	DNTAG0832	-0.117811	-0.2291	-0.0144942
2_DNTAG0833	2	YIR001C	SGN1	DNTAG0833	-0.121531	0.0401895	-0.303696
2_DNTAG0834	2	YER032W	FIR1	DNTAG0834	0.0197855	-0.204573	0.213904
2_DNTAG0835	2	YGR178C	PBP1	DNTAG0835	0.0277684	-0.0921558	0.138484
2_DNTAG0836	2	YIL030C	SSM4	DNTAG0836	-0.833876	-0.926243	-0.747069
2_DNTAG0837	2	YKL208W	CBT1	DNTAG0837	-0.0492858	0.0201826	-0.122269
2_DNTAG0838	2	YGL094C	PAN2	DNTAG0838	0.167533	-0.650252	0.686258
2_DNTAG0839	2	YDR195W	REF2	DNTAG0839	-0.741526	-0.940641	-0.566589
2_DNTAG0841	2	YDL175C	AIR2	DNTAG0841	-0.140659	-0.13742	-0.143906
2_DNTAG0842	2	YIL079C	AIR1	DNTAG0842	0.137084	0.225045	0.0434088
2_DNTAG0843	2	YDR432W	NPL3	DNTAG0843	-0.405576		-0.405576
2_DNTAG0844	2	YHR015W	MIP6	DNTAG0844	0.0296099	0.231279	-0.204903
2_DNTAG0845	2	YJL140W	RPB4	DNTAG0845	0.174972	0.242775	0.103825
2_DNTAG0847	2	YML062C	MFT1	DNTAG0847	0.583524	-0.0784157	1.03556
2_DNTAG0849	2	YHR167W	THP2	DNTAG0849	0.234187	0.403758	0.0419962
2_DNTAG0850	2	YDR159W	SAC3	DNTAG0850	0.825751	0.625473	1.00158
2_DNTAG0851	2	YDR395W	SXM1	DNTAG0851	-0.130204	-0.0799015	-0.182324
2_DNTAG0853	2	YLR335W	NUP2	DNTAG0853	0.259715	0.197197	0.319636
2_DNTAG0854	2	YMR129W	POM152	DNTAG0854	0.092674	0.221799	-0.0491538
2_DNTAG0855	2	YDL088C	ASM4	DNTAG0855	0.0538264	-0.0456435	0.146878
2_DNTAG0856	2	YER107C	GLE2	DNTAG0856	0.147072	0.0958807	0.196509
2_DNTAG0858	2	YKL057C	NUP120	DNTAG0858	-0.096013	-0.0320426	-0.162952
2_DNTAG0859	2	YKR082W	NUP133	DNTAG0859	0.482584	0.603854	0.350178
2_DNTAG0860	2	YER105C	NUP157	DNTAG0860	-0.1312	-0.333541	0.0462218
2_DNTAG0861	2	YBL079W	NUP170	DNTAG0861	0.0621972	0.0731288	0.0511821
2_DNTAG0862	2	YML103C	NUP188	DNTAG0862	0.128189	0.243653	0.00267381
2_DNTAG0863	2	YDR192C	NUP42	DNTAG0863	-0.0403873	0.076745	-0.167877
2_DNTAG0864	2	YMR153W	NUP53	DNTAG0864	0.0603756	-0.0104084	0.127848
2_DNTAG0865	2	YDL116W	NUP84	DNTAG0865	0.654005	0.686011	0.621272
2_DNTAG0866	2	YGL100W	SEH1	DNTAG0866	0.147984	0.242828	0.046463
2_DNTAG0867	2	YML113W	DAT1	DNTAG0867	0.15358	0.163465	0.143626
2_DNTAG0868	2	YER161C	SPT2	DNTAG0868	-0.169226	-0.21876	-0.121336
2_DNTAG0869	2	YDR443C	SSN2	DNTAG0869	0.118844	0.292376	-0.0784532
2_DNTAG0870	2	YBR050C	REG2	DNTAG0870	-0.00166551	-0.00286403	-0.000467982
2_DNTAG0871	2	YMR182C	RGM1	DNTAG0871	0.271718	0.541236	-0.0599898
2_DNTAG0872	2	YNL167C	SKO1	DNTAG0872	-0.0586993	0.0908751	-0.225594
2_DNTAG0873	2	YCR081W	SRB8	DNTAG0873	0.14069	0.0427249	0.232424
2_DNTAG0874	2	YOR140W	SFL1	DNTAG0874	-0.134909	-0.246079	-0.0316961
2_DNTAG0875	2	YPR065W	ROX1	DNTAG0875	-0.242468	-0.0976809	-0.403424
2_DNTAG0876	2	YKL005C	BYE1	DNTAG0876	-0.00590945	0.0748091	-0.0914132
2_DNTAG0877	2	YER028C	MIG3	DNTAG0877	-0.146212	-0.117523	-0.175482
2_DNTAG0879	2	YJL110C	GZF3	DNTAG0879	-0.174762	-0.34094	-0.0257641
2_DNTAG0880	2	YDR005C	MAF1	DNTAG0880	0.140606	0.192232	0.0870651
2_DNTAG0882	2	YDR207C	UME6	DNTAG0882	0.0758019	0.120198	0.0299961
2_DNTAG0883	2	YML029W	USA1	DNTAG0883	0.140206	0.10862	0.171116
2_DNTAG0884	2	YDR163W	CWC15	DNTAG0884	0.0898021	0.000544388	0.173858
2_DNTAG0885	2	YPR101W	SNT309	DNTAG0885	0.680533	0.576585	0.777492
2_DNTAG0886	2	YMR125W	STO1	DNTAG0886	-0.0877697	-0.107845	-0.06797
2_DNTAG0888	2	YBR119W	MUD1	DNTAG0888	0.0775709	0.0308656	0.122811
2_DNTAG0889	2	YNL286W	CUS2	DNTAG0889	0.0153036	0.072945	-0.0447369
2_DNTAG0892	2	YPL213W	LEA1	DNTAG0892	0.346218	0.0962721	0.559188
2_DNTAG0893	2	YJR050W	ISY1	DNTAG0893	-0.0839492	0.0800059	-0.268955
2_DNTAG0894	2	YBR188C	NTC20	DNTAG0894	0.140858	0.402591	-0.17912
2_DNTAG0897	2	YOR308C	SNU66	DNTAG0897	0.0150182	0.133184	-0.113696
2_DNTAG0898	2	YHR165C	PRP8	DNTAG0898	-0.0813753	-0.0511079	-0.112291
2_DNTAG0899	2	YDR378C	LSM6	DNTAG0899	0.494002	0.379406	0.600162
2_DNTAG0901	2	YOR185C	GSP2	DNTAG0901	-0.0630029	-0.10977	-0.0177044
2_DNTAG0902	2	YLR018C	POM34	DNTAG0902	0.0411025	-0.0466415	0.123815
2_DNTAG0903	2	YKR092C	SRP40	DNTAG0903	-0.467278	-0.318079	-0.633706
2_DNTAG0904	2	YAR002W	NUP60	DNTAG0904	0.307541	0.362822	0.250058
2_DNTAG0905	2	YPR018W	RLF2	DNTAG0905	0.119192	0.212962	0.0189016
2_DNTAG0906	2	YOR023C	AHC1	DNTAG0906	0.035435	-0.003074	0.0729427
2_DNTAG0907	2	YAL051W	OAF1	DNTAG0907	0.0821346	0.101858	0.0621382
2_DNTAG0908	2	YOR363C	PIP2	DNTAG0908	0.248757	0.339583	0.151828
2_DNTAG0909	2	YGR233C	PHO81	DNTAG0909	-0.0696706	-0.0797871	-0.0596245
2_DNTAG0910	2	YFR034C	PHO4	DNTAG0910	0.234741	0.088194	0.367766
2_DNTAG0912	2	YNL004W	HRB1	DNTAG0912	0.0526306	-0.199337	0.267066
2_DNTAG0913	2	YKL214C	YRA2	DNTAG0913	-0.0179435	0.0675545	-0.108829
2_DNTAG0914	2	YPL181W	CTI6	DNTAG0914	-0.0805527	0.0776907	-0.258316
2_DNTAG0915	2	YIR018W	YAP5	DNTAG0915	0.139765	0.0620199	0.213534
2_DNTAG0916	2	YDR259C	YAP6	DNTAG0916	0.110733	0.0730206	0.147485
2_DNTAG0917	2	YOL028C	YAP7	DNTAG0917	0.103716	0.151966	0.053796
2_DNTAG0918	2	YHR006W	STP2	DNTAG0918	0.0733376	0.212787	-0.0810473
2_DNTAG0919	2	YOR298C-A	MBF1	DNTAG0919	-0.151605	-0.148143	-0.155075
2_DNTAG0920	2	YBR182C	SMP1	DNTAG0920	0.233939	0.329601	0.13148
2_DNTAG0921	2	YMR042W	ARG80	DNTAG0921	0.0633796	0.150631	-0.0294903
2_DNTAG0922	2	YOL108C	INO4	DNTAG0922	0.0137587	-0.00643886	0.0336774
2_DNTAG0923	2	YPR005C	HAL1	DNTAG0923	0.0762786	0.29725	-0.184769
2_DNTAG0924	2	YDR423C	CAD1	DNTAG0924	0.00472869	-0.0264993	0.035295
2_DNTAG0927	2	YDR421W	ARO80	DNTAG0927	0.299447	0.213684	0.380398
2_DNTAG0928	2	YMR280C	CAT8	DNTAG0928	0.672816	-0.536875	1.32141
2_DNTAG0929	2	YDR123C	INO2	DNTAG0929	0.0412388	0.0111456	0.0707171
2_DNTAG0930	2	YMR021C	MAC1	DNTAG0930	0.199639	0.357487	0.0223737
2_DNTAG0931	2	YKL015W	PUT3	DNTAG0931	-0.13949	-0.0661965	-0.216707
2_DNTAG0933	2	YMR039C	SUB1	DNTAG0933	0.0756726	0.154871	-0.00812678
2_DNTAG0935	2	YGL071W	AFT1	DNTAG0935	0.0927688	0.0611531	0.123707
2_DNTAG0936	2	YGL254W	FZF1	DNTAG0936	-0.0823344	-0.146607	-0.0208038
2_DNTAG0937	2	YDR463W	STP1	DNTAG0937	0.190708		0.190708
2_DNTAG0939	2	YIR033W	MGA2	DNTAG0939	0.269723	0.412646	0.111069
2_DNTAG0940	2	YKL020C	SPT23	DNTAG0940	-0.0970266	-0.0590091	-0.136073
2_DNTAG0944	2	YPR073C	LTP1	DNTAG0944	-0.1847	-0.413146	0.0124689
2_DNTAG0945	2	YGL208W	SIP2	DNTAG0945	-0.00717419	0.0755098	-0.0948866
2_DNTAG0946	2	YDR422C	SIP1	DNTAG0946	-0.0868403	0.0644533	-0.255879
2_DNTAG0952	2	YGL213C	SKI8	DNTAG0952	-0.273377	-0.215619	-0.333545
2_DNTAG0954	2	YPL072W	UBP16	DNTAG0954	-0.194084	-0.163358	-0.225478
2_DNTAG0955	2	YNL186W	UBP10	DNTAG0955	-0.400741	-0.375944	-0.425971
2_DNTAG0956	2	YFR010W	UBP6	DNTAG0956	-0.882641	-0.84859	-0.917515
2_DNTAG0957	2	YMR223W	UBP8	DNTAG0957	-0.0837489	0.0219494	-0.197808
2_DNTAG0958	2	YDR457W	TOM1	DNTAG0958	-0.0571985	-0.00972811	-0.106284
2_DNTAG0959	2	YDR335W	MSN5	DNTAG0959	0.403953	0.482314	0.321091
2_DNTAG0960	2	YBR165W	UBS1	DNTAG0960	-0.133473	-0.136634	-0.130318
2_DNTAG0961	2	YIL149C	MLP2	DNTAG0961	0.0439303	-0.0964837	0.171882
2_DNTAG0963	2	YGL241W	KAP114	DNTAG0963	-0.0754334	-0.151594	-0.00309236
2_DNTAG0965	2	YJR132W	NMD5	DNTAG0965	-0.240344	-0.324934	-0.16044
2_DNTAG0967	2	YPL125W	KAP120	DNTAG0967	0.0747119	-0.0134738	0.157816
2_DNTAG0968	2	YBR017C	KAP104	DNTAG0968	-0.0171009	0.158343	-0.216873
2_DNTAG0969	2	YGL016W	KAP122	DNTAG0969	-0.0461744	-0.0936123	-0.000246765
2_DNTAG0970	2	YJR147W	HMS2	DNTAG0970	0.0730261	-0.206768	0.307272
2_DNTAG0971	2	YKL043W	PHD1	DNTAG0971	-0.0314225	0.0233859	-0.0883956
2_DNTAG0972	2	YIL010W	DOT5	DNTAG0972	0.105192	0.0249002	0.181249
2_DNTAG0973	2	YNL229C	URE2	DNTAG0973	-0.276652	-0.402974	-0.160506
2_DNTAG0974	2	YOL001W	PHO80	DNTAG0974	0.171564	0.155703	0.187252
2_DNTAG0975	2	YNL278W	CAF120	DNTAG0975	-0.102623	-0.0323287	-0.176518
2_DNTAG0976	2	YGR134W	CAF130	DNTAG0976	-0.243328	-0.124488	-0.372842
2_DNTAG0977	2	YNL288W	CAF40	DNTAG0977	0.0837293	-1.00789	0.697982
2_DNTAG0978	2	YGL151W	NUT1	DNTAG0978	-0.0891524	-0.0465904	-0.133008
2_DNTAG0979	2	YMR179W	SPT21	DNTAG0979	-0.316115	-0.425243	-0.214664
2_DNTAG0980	2	YPL101W	ELP4	DNTAG0980	-0.301046	-0.274594	-0.327991
2_DNTAG0981	2	YGR200C	ELP2	DNTAG0981	-0.0903009	-0.232863	0.0394318
2_DNTAG0982	2	YMR312W	ELP6	DNTAG0982	-0.302676	-0.270063	-0.336043
2_DNTAG0983	2	YHR187W	IKI1	DNTAG0983	-0.468877	-0.298174	-0.662523
2_DNTAG0984	2	YPL086C	ELP3	DNTAG0984	-0.34567	-0.284939	-0.40907
2_DNTAG0985	2	YLR384C	IKI3	DNTAG0985	-0.381122	-0.126735	-0.690175
2_DNTAG0986	2	YHL009C	YAP3	DNTAG0986	0.007546	0.0506779	-0.0369152
2_DNTAG0987	2	YAL021C	CCR4	DNTAG0987	0.011892	0.18157	-0.180435
2_DNTAG0988	2	YIL038C	NOT3	DNTAG0988	-0.277052	-0.125452	-0.446473
2_DNTAG0990	2	YNR052C	POP2	DNTAG0990	0.0884632	0.160089	0.0130944
2_DNTAG0993	2	YBR089C-A	NHP6B	DNTAG0993	-0.100537	-0.0296657	-0.17507
2_DNTAG0994	2	YBL005W	PDR3	DNTAG0994	-0.148069	-0.156668	-0.139521
2_DNTAG0995	2	YOR028C	CIN5	DNTAG0995	0.0571408	0.184815	-0.0829388
2_DNTAG0997	2	YIR017C	MET28	DNTAG0997	-0.113352	-0.0800288	-0.147463
2_DNTAG0998	2	YDR043C	NRG1	DNTAG0998	-0.222957	-0.211928	-0.234071
2_DNTAG0999	2	YGL013C	PDR1	DNTAG0999	0.0702056	-0.0729676	0.200444
2_DNTAG1000	2	YJL056C	ZAP1	DNTAG1000	0.0685724	0.0376743	0.0988227
2_DNTAG1001	2	YHR099W	TRA1	DNTAG1001	-0.0698279	0.0225148	-0.168488
2_DNTAG1002	2	YOL004W	SIN3	DNTAG1002	0.53967	0.63881	0.433212
2_DNTAG1003	2	YAL013W	DEP1	DNTAG1003	0.489498	0.584976	0.387251
2_DNTAG1004	2	YER088C	DOT6	DNTAG1004	0.11491	0.0847835	0.14442
2_DNTAG1005	2	YNL136W	EAF7	DNTAG1005	0.0134151	-0.201502	0.200428
2_DNTAG1006	2	YGL115W	SNF4	DNTAG1006	0.0857896	-0.1651	0.299445
2_DNTAG1007	2	YOR047C	STD1	DNTAG1007	-0.0916528	0.0256824	-0.219382
2_DNTAG1008	2	YGL035C	MIG1	DNTAG1008	0.0748568	0.0498986	0.0993906
2_DNTAG1009	2	YIR023W	DAL81	DNTAG1009	0.121507	0.146488	0.096087
2_DNTAG1010	2	YLR451W	LEU3	DNTAG1010	0.0988703	0.104507	0.0932112
2_DNTAG1011	2	YGL209W	MIG2	DNTAG1011	-0.251516	-0.179651	-0.327149
2_DNTAG1012	2	YJL089W	SIP4	DNTAG1012	-0.0199865	-0.02379	-0.016193
2_DNTAG1013	2	YPR009W	SUT2	DNTAG1013	-0.0686488	-0.0119835	-0.127631
2_DNTAG1014	2	YFL031W	HAC1	DNTAG1014	-0.0355384	-0.00191715	-0.0699619
2_DNTAG1015	2	YGL162W	SUT1	DNTAG1015	0.0232616	0.162396	-0.130738
2_DNTAG1016	2	YDL170W	UGA3	DNTAG1016	-0.169576	-0.106312	-0.235742
2_DNTAG1017	2	YPL038W	MET31	DNTAG1017	-0.131787	-0.0691353	-0.197283
2_DNTAG1018	2	YFL028C	CAF16	DNTAG1018	0.0174643	0.029151	0.0056822
2_DNTAG1020	2	YKR036C	CAF4	DNTAG1020	0.0361943	0.195547	-0.14297
2_DNTAG1021	2	YPL127C	HHO1	DNTAG1021	-0.151886	-0.279168	-0.0349291
2_DNTAG1024	2	YGR063C	SPT4	DNTAG1024	0.8922	1.02875	0.741361
2_DNTAG1025	2	YDR009W	GAL3	DNTAG1025	0.0972896	-0.00689851	0.194458
2_DNTAG1026	2	YML051W	GAL80	DNTAG1026	0.0999017	0.053833	0.144545
2_DNTAG1027	2	YNL027W	CRZ1	DNTAG1027	0.228775	0.305639	0.147584
2_DNTAG1028	2	YLR098C	CHA4	DNTAG1028	0.22047	0.446362	-0.0474772
2_DNTAG1029	2	YGR288W	MAL13	DNTAG1029	0.141413	0.216672	0.0620118
2_DNTAG1030	2	YBR297W	MAL33	DNTAG1030	0.195686	0.182524	0.20873
2_DNTAG1031	2	YLR014C	PPR1	DNTAG1031	0.0059009	-0.080595	0.087503
2_DNTAG1032	2	YPL248C	GAL4	DNTAG1032	0.00267139	0.088692	-0.0888052
2_DNTAG1033	2	YML076C	WAR1	DNTAG1033	0.06573	0.0576652	0.07375
2_DNTAG1034	2	YNL239W	LAP3	DNTAG1034	0.0142239	0.162447	-0.15099
2_DNTAG1035	2	YML007W	YAP1	DNTAG1035	-0.322474	-0.486915	-0.174873
2_DNTAG1037	2	YKL062W	MSN4	DNTAG1037	-0.00520916	-0.106828	0.0897205
2_DNTAG1038	2	YLR266C	PDR8	DNTAG1038	-0.027486	-0.816174	0.479552
2_DNTAG1039	2	YMR037C	MSN2	DNTAG1039	-0.246079	-0.398435	-0.108287
2_DNTAG1041	2	YPL133C	RDS2	DNTAG1041	-0.103904	-0.22432	0.007231
2_DNTAG1043	2	YPL029W	SUV3	DNTAG1043	0.0336108	0.0728853	-0.00676299
2_DNTAG1044	2	YMR287C	DSS1	DNTAG1044	0.265131	0.564751	-0.113477
2_DNTAG1045	2	YKL149C	DBR1	DNTAG1045	-0.160916	-0.055786	-0.274313
2_DNTAG1046	2	YOL054W	PSH1	DNTAG1046	0.0285355	0.123603	-0.0732413
2_DNTAG1047	2	YLR418C	CDC73	DNTAG1047	-0.421574	-0.329685	-0.519716
2_DNTAG1049	2	YNL230C	ELA1	DNTAG1049	0.146453	0.0250435	0.258433
2_DNTAG1050	2	YPL046C	ELC1	DNTAG1050	-0.193326	-0.201412	-0.185284
2_DNTAG1051	2	YPR129W	SCD6	DNTAG1051	-0.156354	-0.190845	-0.122668
2_DNTAG1052	2	YHR121W	LSM12	DNTAG1052	-0.168082	-0.0756627	-0.26683
2_DNTAG1053	2	YHL034C	SBP1	DNTAG1053	-0.0941881	-0.0545542	-0.134942
2_DNTAG1054	2	YLR107W	REX3	DNTAG1054	-0.0267443	-0.156145	0.0919997
2_DNTAG1055	2	YLR059C	REX2	DNTAG1055	-0.0618674	-0.0368006	-0.0873773
2_DNTAG1056	2	YOR017W	PET127	DNTAG1056	-0.270493	-0.237965	-0.303772
2_DNTAG1057	2	YMR180C	CTL1	DNTAG1057	0.0246549	-0.0264481	0.0740094
2_DNTAG1058	2	YFL001W	DEG1	DNTAG1058	0.666358	0.742444	0.586035
2_DNTAG1059	2	YDR194C	MSS116	DNTAG1059	-0.056498	0.00612197	-0.12196
2_DNTAG1060	2	YJL133W	MRS3	DNTAG1060	0.0314795	-0.0514842	0.109931
2_DNTAG1061	2	YKR052C	MRS4	DNTAG1061	-0.0555179	-0.109533	-0.00345278
2_DNTAG1062	2	YMR285C	NGL2	DNTAG1062	-0.219517	-0.187578	-0.252178
2_DNTAG1063	2	YLR293C	GSP1	DNTAG1063	-0.272615	-0.18621	-0.364526
2_DNTAG1064	2	YPL157W	TGS1	DNTAG1064	0.14549	0.25795	0.0235158
2_DNTAG1065	2	YPR057W	BRR1	DNTAG1065	0.21069	0.247751	0.172653
2_DNTAG1066	2	YIR005W	IST3	DNTAG1066	0.0914046	0.176706	0.000740666
2_DNTAG1067	2	YHL027W	RIM101	DNTAG1067	-0.109306	-0.150259	-0.0694834
2_DNTAG1068	2	YDR392W	SPT3	DNTAG1068	0.0464202	-0.0507973	0.137498
2_DNTAG1069	2	YLR399C	BDF1	DNTAG1069	-0.188026	-0.139757	-0.237966
2_DNTAG1071	2	YOR337W	TEA1	DNTAG1071	-0.166299	-0.0741183	-0.264773
2_DNTAG1072	2	YMR070W	MOT3	DNTAG1072	-0.271051	-0.145601	-0.408457
2_DNTAG1073	2	YMR136W	GAT2	DNTAG1073	-0.157879	-0.863615	0.313954
2_DNTAG1074	2	YLR013W	GAT3	DNTAG1074	-0.0668514	-0.0767002	-0.0570693
2_DNTAG1075	2	YIR013C	GAT4	DNTAG1075	0.0773275	0.0466464	0.10737
2_DNTAG1076	2	YMR228W	MTF1	DNTAG1076	-0.0750848	-0.123644	-0.0281074
2_DNTAG1078	2	YDR156W	RPA14	DNTAG1078	0.105728	0.208642	-0.00509493
2_DNTAG1080	2	YJL148W	RPA34	DNTAG1080	-0.626486	-0.870973	-0.41749
2_DNTAG1082	2	YOR295W	UAF30	DNTAG1082	0.141763	0.0623832	0.217002
2_DNTAG1084	2	YOL051W	GAL11	DNTAG1084	0.278239	-0.0273352	0.530267
2_DNTAG1085	2	YPR070W	MED1	DNTAG1085	0.0163372	-0.128672	0.148093
2_DNTAG1086	2	YDL005C	MED2	DNTAG1086	0.410558	0.329548	0.48726
2_DNTAG1088	2	YNL236W	SIN4	DNTAG1088	0.0161514	-0.214209	0.214744
2_DNTAG1089	2	YHR041C	SRB2	DNTAG1089	1.01258	0.968717	1.05515
2_DNTAG1092	2	YOR123C	LEO1	DNTAG1092	-0.297578	-0.389912	-0.210799
2_DNTAG1093	2	YGL244W	RTF1	DNTAG1093	-1.81001	-1.721	-1.90487
2_DNTAG1094	2	YOL145C	CTR9	DNTAG1094	-0.000530558	-0.0350793	0.0332101
2_DNTAG1097	2	YNR010W	CSE2	DNTAG1097	0.3548	0.365654	0.343865
2_DNTAG1099	2	YPL047W	SGF11	DNTAG1099	0.324088	0.400866	0.242994
2_DNTAG1100	2	YBL103C	RTG3	DNTAG1100	-0.127642	-0.33511	0.0537072
2_DNTAG1101	2	YER045C	ACA1	DNTAG1101	-0.0235255	-0.0968364	0.0462396
2_DNTAG1102	2	YPR008W	HAA1	DNTAG1102	-0.173493	-0.0816468	-0.271587
2_DNTAG1103	2	YNL257C	SIP3	DNTAG1103	-0.0319455	-0.128832	0.0588423
2_DNTAG1105	2	YGL166W	CUP2	DNTAG1105	-0.0237652	-0.121003	0.0673304
2_DNTAG1106	2	YIL036W	CST6	DNTAG1106	-0.084216	-0.146558	-0.0244572
2_DNTAG1107	2	YPL177C	CUP9	DNTAG1107	0.036929	0.0382813	0.0355754
2_DNTAG1108	2	YCR065W	HCM1	DNTAG1108	-0.0394795	0.0262424	-0.108339
2_DNTAG1109	2	YOL089C	HAL9	DNTAG1109	-0.036467	-0.072855	-0.000974239
2_DNTAG1110	2	YFL021W	GAT1	DNTAG1110	0.0959168	-0.128529	0.2901
2_DNTAG1112	2	YPL202C	AFT2	DNTAG1112	-0.161777	0.0299875	-0.382997
2_DNTAG1113	2	YNL314W	DAL82	DNTAG1113	0.0921083	0.00866981	0.170984
2_DNTAG1114	2	YOR179C	SYC1	DNTAG1114	0.15195	-0.0651985	0.34065
2_DNTAG1115	2	YDR216W	ADR1	DNTAG1115	-0.124273	-0.0583156	-0.19339
2_DNTAG1117	2	YKR034W	DAL80	DNTAG1117	-0.0249931	-0.0627825	0.0118317
2_DNTAG1119	2	YHR178W	STB5	DNTAG1119	0.012245	0.00295749	0.021473
2_DNTAG1121	2	YKL109W	HAP4	DNTAG1121	-0.287572	-0.255708	-0.320156
2_DNTAG1122	2	YGL237C	HAP2	DNTAG1122	-0.0759455	-0.0121051	-0.142742
2_DNTAG1123	2	YBL021C	HAP3	DNTAG1123	-0.0580509	0.107265	-0.244792
2_DNTAG1124	2	YOR358W	HAP5	DNTAG1124	0.00385385	-0.0408436	0.047208
2_DNTAG1125	2	YER063W	THO1	DNTAG1125	0.0565851	-0.0584929	0.163158
2_DNTAG1126	2	YMR012W	CLU1	DNTAG1126	0.0164076	-0.325415	0.292554
2_DNTAG1127	2	YPL119C	DBP1	DNTAG1127	-0.0497568	-0.165468	0.057359
2_DNTAG1129	2	YKL054C	DEF1	DNTAG1129	0.125458	0.196904	0.0502891
2_DNTAG1130	2	YDR143C	SAN1	DNTAG1130	0.0558623	-0.176073	0.255623
2_DNTAG1131	2	YNL085W	MKT1	DNTAG1131	-0.0939684	-0.220415	0.0222833
2_DNTAGbre1KO	2	BRE1_Plate2	BRE1	DNTAGbre1KO	-1.4695	-1.77813	-1.2154
2_DNTAGdot1KO	2	DOT1_Plate2	DOT1	DNTAGdot1KO	0.252895	-0.188878	0.590631
2_DNTAGDot1OE	2	DOT1OE_Plate2	DOT1OE	DNTAGDot1OE	2.97663	2.67266	3.22756
3_DNTAG0001	3	YDR534C	FIT1	DNTAG0001	0.368442	0.0249051	0.645705
3_DNTAG0003	3	YOR383C	FIT3	DNTAG0003	-0.118467	-0.0051777	-0.241416
3_DNTAG0004	3	YJR150C	DAN1	DNTAG0004	-0.056098	-0.16318	0.043582
3_DNTAG0005	3	YPL163C	SVS1	DNTAG0005	-0.22198	-0.0891197	-0.368328
3_DNTAG0006	3	YFL010W-A	AUA1	DNTAG0006	0.135021	-0.0945084	0.332995
3_DNTAG0008	3	YBL086C	YBL086C	DNTAG0008	0.0850039	0.0828486	0.0871559
3_DNTAG0009	3	YGR201C	YGR201C	DNTAG0009	0.0591591	0.110034	0.0064244
3_DNTAG0010	3	YMR279C	YMR279C	DNTAG0010	0.308215	0.500178	0.0867323
3_DNTAG0011	3	YCR045C	RRT12	DNTAG0011	0.0234785	-0.0835506	0.123113
3_DNTAG0012	3	YIL170W	HXT12	DNTAG0012	0.0911621	0.0139944	0.164411
3_DNTAG0013	3	YJL165C	HAL5	DNTAG0013	0.123964	-0.0266075	0.260295
3_DNTAG0014	3	YIL009W	FAA3	DNTAG0014	0.161282	-0.0855213	0.371967
3_DNTAG0015	3	YKL198C	PTK1	DNTAG0015	0.0924714	0.126418	0.0577068
3_DNTAG0016	3	YLL019C	KNS1	DNTAG0016	0.148302	0.151109	0.145489
3_DNTAG0017	3	YPR200C	ARR2	DNTAG0017	0.166066	0.154176	0.177858
3_DNTAG0018	3	YDR277C	MTH1	DNTAG0018	0.0427759	0.00672932	0.0779437
3_DNTAG0019	3	YPL244C	HUT1	DNTAG0019	-0.035965	0.11292	-0.202002
3_DNTAG0020	3	YEL062W	NPR2	DNTAG0020	-0.146452	-0.0893749	-0.205881
3_DNTAG0021	3	YIR036C	IRC24	DNTAG0021	-0.0973555	-0.0814645	-0.113423
3_DNTAG0022	3	YOR267C	HRK1	DNTAG0022	-0.0828985	-0.407466	0.181893
3_DNTAG0023	3	YPL026C	SKS1	DNTAG0023	-0.0799555	-0.126307	-0.035047
3_DNTAG0025	3	YNL264C	PDR17	DNTAG0025	-0.0241368	0.0476378	-0.09967
3_DNTAG0027	3	YOR031W	CRS5	DNTAG0027	0.0753458	-0.147245	0.26814
3_DNTAG0028	3	YGR088W	CTT1	DNTAG0028	0.158612	0.218578	0.0960455
3_DNTAG0029	3	YPL226W	NEW1	DNTAG0029	0.00238575	-0.239999	0.209846
3_DNTAG0031	3	YNL077W	APJ1	DNTAG0031	-0.178592	-0.257143	-0.104097
3_DNTAG0033	3	YDR515W	SLF1	DNTAG0033	0.0436271	-0.130175	0.198724
3_DNTAG0034	3	YJR049C	UTR1	DNTAG0034	0.109805	0.254011	-0.0504318
3_DNTAG0035	3	YGL227W	VID30	DNTAG0035	-0.110171	-0.193277	-0.0315924
3_DNTAG0036	3	YDL125C	HNT1	DNTAG0036	0.0923061	0.0823297	0.102214
3_DNTAG0039	3	YMR186W	HSC82	DNTAG0039	-0.540702	-0.85992	-0.279478
3_DNTAG0041	3	YKL213C	DOA1	DNTAG0041	-0.539902	-0.400678	-0.694009
3_DNTAG0042	3	YBR173C	UMP1	DNTAG0042	-0.729568	-0.985905	-0.511978
3_DNTAG0044	3	YHR055C	CUP1-2	DNTAG0044	0.139306	0.118451	0.159863
3_DNTAG0046	3	YMR038C	CCS1	DNTAG0046	0.525655	0.504271	0.546726
3_DNTAG0047	3	YJL145W	SFH5	DNTAG0047	-0.0135584	0.0105007	-0.0380255
3_DNTAG0048	3	YLR043C	TRX1	DNTAG0048	0.252757	0.228844	0.276279
3_DNTAG0049	3	YGR209C	TRX2	DNTAG0049	0.123147	0.0430944	0.198989
3_DNTAG0051	3	YLL055W	YCT1	DNTAG0051	-0.0895111	-0.180489	-0.00393178
3_DNTAG0052	3	YKL008C	LAC1	DNTAG0052	0.085173	0.191288	-0.0293713
3_DNTAG0053	3	YML059C	NTE1	DNTAG0053	0.111034	0.154505	0.0662116
3_DNTAG0055	3	YNR039C	ZRG17	DNTAG0055	-0.217246	-0.219644	-0.214852
3_DNTAG0056	3	YBR132C	AGP2	DNTAG0056	-0.0684534	0.127954	-0.295877
3_DNTAG0057	3	YNL291C	MID1	DNTAG0057	-0.0888013	-0.218745	0.0303993
3_DNTAG0058	3	YLR205C	HMX1	DNTAG0058	-0.125062	-0.045812	-0.208919
3_DNTAG0059	3	YLR242C	ARV1	DNTAG0059	0.404259	0.271488	0.525835
3_DNTAG0060	3	YEL065W	SIT1	DNTAG0060	-0.00437904	0.0630576	-0.0751231
3_DNTAG0061	3	YHL040C	ARN1	DNTAG0061	-0.282352	-0.305317	-0.259748
3_DNTAG0063	3	YKL174C	TPO5	DNTAG0063	0.0577015	-0.0571937	0.164118
3_DNTAG0064	3	YOR079C	ATX2	DNTAG0064	-0.0452773	0.0837911	-0.187037
3_DNTAG0065	3	YDR270W	CCC2	DNTAG0065	0.175036	0.27189	0.0712089
3_DNTAG0066	3	YJR040W	GEF1	DNTAG0066	0.184474	0.0456885	0.311072
3_DNTAG0067	3	YBR036C	CSG2	DNTAG0067	0.10333	0.15261	0.0523063
3_DNTAG0068	3	YAL058W	CNE1	DNTAG0068	0.398305	0.111451	0.637473
3_DNTAG0069	3	YER060W	FCY21	DNTAG0069	-0.108876	-0.151014	-0.067934
3_DNTAG0070	3	YER060W-A	FCY22	DNTAG0070	0.0982419	0.262647	-0.0873375
3_DNTAG0071	3	YHR048W	YHK8	DNTAG0071	0.0841343	-0.0178611	0.179393
3_DNTAG0072	3	YCR075C	ERS1	DNTAG0072	-0.247378	-0.324281	-0.174369
3_DNTAG0073	3	YDR406W	PDR15	DNTAG0073	0.0126697	-0.0116921	0.0366269
3_DNTAG0075	3	YKR039W	GAP1	DNTAG0075	0.00454011	0.0560091	-0.0488332
3_DNTAG0076	3	YPR201W	ARR3	DNTAG0076	0.214175	0.266639	0.159731
3_DNTAG0077	3	YLR411W	CTR3	DNTAG0077	-0.110798	-0.141348	-0.0808814
3_DNTAG0078	3	YGL255W	ZRT1	DNTAG0078	0.0747653	0.0465318	0.102457
3_DNTAG0080	3	YIL121W	QDR2	DNTAG0080	-0.0383925	-0.0182515	-0.0588187
3_DNTAG0081	3	YPR194C	OPT2	DNTAG0081	0.00547364	-0.0233378	0.033721
3_DNTAG0082	3	YML123C	PHO84	DNTAG0082	0.210341	0.469731	-0.106136
3_DNTAG0084	3	YBR008C	FLR1	DNTAG0084	-0.131782	-0.270707	-0.00506739
3_DNTAG0085	3	YGR055W	MUP1	DNTAG0085	-0.132041	-0.0233944	-0.249541
3_DNTAG0086	3	YHL036W	MUP3	DNTAG0086	0.137756	0.147102	0.128348
3_DNTAG0088	3	YGL084C	GUP1	DNTAG0088	-0.206792	-0.0692291	-0.358869
3_DNTAG0089	3	YBR295W	PCA1	DNTAG0089	0.284002	0.36774	0.195101
3_DNTAG0090	3	YKL064W	MNR2	DNTAG0090	0.189927	0.0301295	0.333776
3_DNTAG0091	3	YDR497C	ITR1	DNTAG0091	-0.196786	-0.181017	-0.212729
3_DNTAG0092	3	YOL103W	ITR2	DNTAG0092	0.148444	0.16692	0.129728
3_DNTAG0094	3	YJL198W	PHO90	DNTAG0094	1.45611	1.47713	1.43478
3_DNTAG0096	3	YGR197C	SNG1	DNTAG0096	0.0439838	0.0058758	0.0811111
3_DNTAG0097	3	YIL013C	PDR11	DNTAG0097	0.321208	0.43442	0.198351
3_DNTAG0098	3	YKR103W	NFT1	DNTAG0098	0.0899358	0.0997589	0.0800455
3_DNTAG0099	3	YKR104W	YKR104W	DNTAG0099	-0.13882	-0.315702	0.0187242
3_DNTAG0100	3	YOL075C	YOL075C	DNTAG0100	0.00225917	0.312423	-0.393382
3_DNTAG0101	3	YAL067C	SEO1	DNTAG0101	-0.210197	-0.40042	-0.042158
3_DNTAG0102	3	YCL073C	GEX1	DNTAG0102	-0.100039	-0.0333617	-0.169948
3_DNTAG0103	3	YKR106W	GEX2	DNTAG0103	-0.321166		-0.321166
3_DNTAG0104	3	YOR071C	NRT1	DNTAG0104	-0.00434279	-0.00385122	-0.00483453
3_DNTAG0105	3	YOR192C	THI72	DNTAG0105	0.0250375	-0.0168285	0.0657228
3_DNTAG0106	3	YDL054C	MCH1	DNTAG0106	-0.182442	0.175035	-0.658747
3_DNTAG0107	3	YKL221W	MCH2	DNTAG0107	-0.126497	-0.072336	-0.182771
3_DNTAG0108	3	YOR306C	MCH5	DNTAG0108	0.03714	0.0291713	0.0450649
3_DNTAG0109	3	YJL036W	SNX4	DNTAG0109	-0.428718	-0.504891	-0.356367
3_DNTAG0110	3	YBR298C	MAL31	DNTAG0110	-0.0395734	0.0800006	-0.169961
3_DNTAG0111	3	YGR289C	MAL11	DNTAG0111	0.03825	-0.159572	0.212189
3_DNTAG0112	3	YLR220W	CCC1	DNTAG0112	-0.00927965	-0.0421912	0.0228978
3_DNTAG0113	3	YAL022C	FUN26	DNTAG0113	0.164998	0.312702	0.000427798
3_DNTAG0114	3	YPR037C	ERV2	DNTAG0114	0.00981883	0.0766939	-0.0603075
3_DNTAG0116	3	YJR095W	SFC1	DNTAG0116	0.118297	0.265655	-0.0458439
3_DNTAG0118	3	YPR021C	AGC1	DNTAG0118	0.430379	0.322955	0.530356
3_DNTAG0119	3	YBR291C	CTP1	DNTAG0119	-0.165972	-0.199206	-0.133486
3_DNTAG0120	3	YER154W	OXA1	DNTAG0120	0.183752	0.206573	0.160565
3_DNTAG0121	3	YPL060W	MFM1	DNTAG0121	0.178003	0.152169	0.203383
3_DNTAG0122	3	YOR334W	MRS2	DNTAG0122	-0.02893	0.104312	-0.175741
3_DNTAG0123	3	YOR222W	ODC2	DNTAG0123	-0.0269962	-0.0915893	0.0348285
3_DNTAG0124	3	YLR188W	MDL1	DNTAG0124	-0.19745	-0.257007	-0.140254
3_DNTAG0125	3	YKL120W	OAC1	DNTAG0125	-0.090761	-0.147829	-0.035865
3_DNTAG0126	3	YDL119C	HEM25	DNTAG0126	0.178608	0.0878696	0.263975
3_DNTAG0127	3	YEL006W	YEA6	DNTAG0127	-0.0687834	-0.142632	0.00146837
3_DNTAG0129	3	YPR058W	YMC1	DNTAG0129	0.0560091	-0.035378	0.141951
3_DNTAG0130	3	YBR104W	YMC2	DNTAG0130	-0.105086	-0.167539	-0.0452243
3_DNTAG0131	3	YMR166C	MME1	DNTAG0131	0.251432	-0.0976519	0.53229
3_DNTAG0132	3	YPR011C	YPR011C	DNTAG0132	-0.0328878	-0.0310644	-0.0347136
3_DNTAG0133	3	YNL083W	SAL1	DNTAG0133	0.0542528	0.0927036	0.014749
3_DNTAG0134	3	YIL006W	YIA6	DNTAG0134	0.0909001	0.106945	0.0746753
3_DNTAG0135	3	YMR241W	YHM2	DNTAG0135	0.113779	0.238823	-0.0231395
3_DNTAG0136	3	YGR096W	TPC1	DNTAG0136	-0.169286	-0.414356	0.040136
3_DNTAG0137	3	YPR067W	ISA2	DNTAG0137	0.144359	-0.0469415	0.313237
3_DNTAG0138	3	YJR135W-A	TIM8	DNTAG0138	-0.238043	-0.179797	-0.298741
3_DNTAG0139	3	YGR181W	TIM13	DNTAG0139	0.220941	0.220117	0.221764
3_DNTAG0141	3	YKL040C	NFU1	DNTAG0141	-0.255753	-0.232825	-0.279051
3_DNTAG0142	3	YOR226C	ISU2	DNTAG0142	0.0825344	0.00189915	0.1589
3_DNTAG0143	3	YLL027W	ISA1	DNTAG0143	-0.143745	-0.150956	-0.136571
3_DNTAG0144	3	YFL036W	RPO41	DNTAG0144	-0.11479	-0.309563	0.0567877
3_DNTAG0146	3	YLR348C	DIC1	DNTAG0146	-0.155829	-0.0904592	-0.224302
3_DNTAG0147	3	YJL112W	MDV1	DNTAG0147	-0.0891148	0.050003	-0.243093
3_DNTAG0148	3	YGR028W	MSP1	DNTAG0148	0.197124	0.42964	-0.0802031
3_DNTAG0149	3	YDR470C	UGO1	DNTAG0149	0.0604543	-0.133799	0.231629
3_DNTAG0151	3	YOR045W	TOM6	DNTAG0151	0.0102607	-0.0644161	0.0812616
3_DNTAG0152	3	YNL070W	TOM7	DNTAG0152	0.0525395	-0.145562	0.226694
3_DNTAG0153	3	YNL121C	TOM70	DNTAG0153	-0.101784	0.0562313	-0.279261
3_DNTAG0154	3	YIL134W	FLX1	DNTAG0154	-0.182919	0.0307602	-0.433843
3_DNTAG0155	3	YKL134C	OCT1	DNTAG0155	0.231155		0.231155
3_DNTAG0156	3	YOR037W	CYC2	DNTAG0156	-0.0559204	-0.0922259	-0.0205061
3_DNTAG0157	3	YER053C	PIC2	DNTAG0157	-0.0159243	-0.00278201	-0.0291874
3_DNTAG0158	3	YDR046C	BAP3	DNTAG0158	0.108498	0.11453	0.102441
3_DNTAG0162	3	YNL318C	HXT14	DNTAG0162	-0.174655	-0.154808	-0.194778
3_DNTAG0163	3	YFL011W	HXT10	DNTAG0163	-0.0570798	0.0157738	-0.133809
3_DNTAG0165	3	YDR342C	HXT7	DNTAG0165	-0.0381378	-0.0976479	0.0190144
3_DNTAG0166	3	YIL114C	POR2	DNTAG0166	-0.0535872	-0.260705	0.127495
3_DNTAG0167	3	YMR177W	MMT1	DNTAG0167	0.110213	0.0397437	0.177401
3_DNTAG0168	3	YPL224C	MMT2	DNTAG0168	-0.0642141	0.10801	-0.25982
3_DNTAG0169	3	YPL135W	ISU1	DNTAG0169	0.0223426	0.112847	-0.074221
3_DNTAG0170	3	YKL217W	JEN1	DNTAG0170	0.0263751	0.148209	-0.106704
3_DNTAG0171	3	YOR317W	FAA1	DNTAG0171	0.104485	0.010436	0.192777
3_DNTAG0172	3	YER015W	FAA2	DNTAG0172	-0.0523329	-0.0429215	-0.061806
3_DNTAG0173	3	YHR050W	SMF2	DNTAG0173	0.0407129	0.120585	-0.0438411
3_DNTAG0174	3	YPL134C	ODC1	DNTAG0174	-0.0264585	-0.0061711	-0.0470352
3_DNTAG0175	3	YJL094C	KHA1	DNTAG0175	-0.0493571	0.0800014	-0.191467
3_DNTAG0176	3	YGR260W	TNA1	DNTAG0176	-0.171304	-0.318259	-0.0379436
3_DNTAG0177	3	YDR256C	CTA1	DNTAG0177	0.191993	-0.0383082	0.390542
3_DNTAG0178	3	YJR077C	MIR1	DNTAG0178	-0.0871989	-0.0505648	-0.124787
3_DNTAG0180	3	YEL030W	ECM10	DNTAG0180	-0.126286	-0.0922174	-0.161178
3_DNTAG0182	3	YDR011W	SNQ2	DNTAG0182	0.00178074	0.385829	-0.523131
3_DNTAG0185	3	YOR011W	AUS1	DNTAG0185	-0.0646317	0.116461	-0.271763
3_DNTAG0186	3	YNR070W	PDR18	DNTAG0186	0.0669201	0.135441	-0.00501818
3_DNTAG0187	3	YNR055C	HOL1	DNTAG0187	0.0379353	-0.0500041	0.120821
3_DNTAG0188	3	YNL125C	ESBP6	DNTAG0188	0.134301	0.110562	0.157656
3_DNTAG0190	3	YNR002C	ATO2	DNTAG0190	-0.174141	-0.240343	-0.110845
3_DNTAG0192	3	YGR257C	MTM1	DNTAG0192	0.0146852	-0.059951	0.0856493
3_DNTAG0193	3	YOR316C	COT1	DNTAG0193	0.164812	-0.0588807	0.358431
3_DNTAG0194	3	YOR197W	MCA1	DNTAG0194	-0.050324	-0.0526701	-0.0479816
3_DNTAG0195	3	YER048C	CAJ1	DNTAG0195	-0.0310814	-0.197954	0.118475
3_DNTAG0196	3	YHR127W	YHR127W	DNTAG0196	-0.164945	-0.162271	-0.167624
3_DNTAG0197	3	YDR205W	MSC2	DNTAG0197	0.0121987	0.148215	-0.137989
3_DNTAG0198	3	YCL025C	AGP1	DNTAG0198	-0.0928249	-0.150353	-0.0375029
3_DNTAG0199	3	YFL055W	AGP3	DNTAG0199	0.015282	-0.0518799	0.0794559
3_DNTAG0200	3	YBR068C	BAP2	DNTAG0200	-0.444055	-0.357242	-0.536429
3_DNTAG0202	3	YPL265W	DIP5	DNTAG0202	0.0309349	-0.191453	0.223577
3_DNTAG0203	3	YGR121C	MEP1	DNTAG0203	-0.00295214	0.00823408	-0.0142258
3_DNTAG0204	3	YPR138C	MEP3	DNTAG0204	-0.140265	-0.0972852	-0.184564
3_DNTAG0205	3	YOL020W	TAT2	DNTAG0205	-0.0876613	-0.0978139	-0.0775796
[truncated: 2,254 more rows]
