# Supplementary material for: Direct screening for chromatin status on DNA barcodes in yeast delineates the regulome of H3K79 methylation by Dot1
Source: eLife. 2016 Dec 6;5:e18919. doi: 10.7554/eLife.18919 (PMC5179194; doi:10.7554/eLife.18919)
Supplement: Figure 2—source data 3. — DOI: http://dx.doi.org/10.7554/eLife.18919.009 [file elife-18919-fig2-data3.xlsx]

## Sheet: Sheet1
Figure 2 - source data 3.
Belongs to Figure 2C
ChIP-qPCR data at the HO promoter, WT versus rtt109d
wt	me1/H3	me3/H3	H3K79me3/H3K79me1
1	0.0523689	0.028934	0.552504
1	0.050874	0.0344066	0.676311
1	0.0734282	0.0289442	0.394184
1	0.0646331	0.032399	0.501276
rtt109d	me1/H3	me3/H3	H3K79me3/H3K79me1
2	0.0426877	0.0476285	1.11574
2	0.0616114	0.0866114	1.40577
