# Supplementary material for: Direct screening for chromatin status on DNA barcodes in yeast delineates the regulome of H3K79 methylation by Dot1
Source: eLife. 2016 Dec 6;5:e18919. doi: 10.7554/eLife.18919 (PMC5179194; doi:10.7554/eLife.18919)
Supplement: Figure 3—source data 1. — DOI: http://dx.doi.org/10.7554/eLife.18919.013 [file elife-18919-fig3-data1.xlsx]

## Sheet: Sheet1
Figure 3 - source data 1
Belonging to Figure 3D
Raw SAM and SAH measurements and calculations
Sample	SAM	SAH	SAM/SAH
	µmol/L	µmol/L
Ado1 1a	111.212	11.7587	9.45784	9.68288
Ado1 1b	243.967	27.0954	9.004
Ado1 1c	202.722	24.1735	8.38616
Ado1 1d	224.423	24.7716	9.0597
Ado1 2a	102.309	10.9231	9.36627
Ado1 2b	103.932	10.775	9.64566
Ado1 2c	121.532	9.44998	12.8605
WT 1a	2.15163	1.41955	1.51571	2.47518
WT 1b	2.40431	0.951974	2.52561
WT 1c	2.51863	1.14378	2.20203
WT 1d	2.48454	0.72594	3.42251
WT 2a	1.19912	0.831359	1.44236
WT 2b	1.51625	0.721123	2.10262
WT 2c	1.38118	0.397424	3.47533
WT 2d	1.56581	0.502625	3.11527
Above is umol/L in 500uL. Total amount in 500uL is:
Sample	SAM	SAH	Cell #	SAM	SAH	SAM average	SAH average
	mole	mole		mg/g DCW	mg/g DCW	mg/g DCW	mg/g DCW
Ado1 1a	5.56059e-08	5.87935e-09	67870000	21.7628	2.22001	37.6004	3.81223
Ado1 1b	1.21983e-07	1.35477e-08	67940000	47.6921	5.11026
Ado1 1c	1.01361e-07	1.20867e-08	67760000	39.7347	4.57129
Ado1 1d	1.12212e-07	1.23858e-08	68040000	43.8072	4.66512
Ado1 2a	5.11543e-08	5.46154e-09	38556000	35.2421	3.63017
Ado1 2b	5.19661e-08	5.38751e-09	39900000	34.5955	3.46034
Ado1 2c	6.07658e-08	4.72499e-09	39984000	40.3687	3.02843
WT 1a	1.07582e-09	7.09777e-10	68700000	0.415962	0.26477	0.468821	0.197971
WT 1b	1.20216e-09	4.75987e-10	68160000	0.468493	0.178965
WT 1c	1.25932e-09	5.71889e-10	67800000	0.493374	0.216165
WT 1d	1.24227e-09	3.6297e-10	67500000	0.488859	0.137807
WT 2a	5.99559e-10	4.15679e-10	40200000	0.396166	0.264994
WT 2b	7.58124e-10	3.60561e-10	40000000	0.503445	0.231006
WT 2c	6.9059e-10	1.98712e-10	39872000	0.46007	0.12772
WT 2d	7.82907e-10	2.51312e-10	39672000	0.524201	0.162343
theoretic DCW per cell:	Mw SAM (g/mol):	Mw SAH (g/mol):
1.5e-11	398.44	384.41
