# Supplementary material for: Direct screening for chromatin status on DNA barcodes in yeast delineates the regulome of H3K79 methylation by Dot1
Source: eLife. 2016 Dec 6;5:e18919. doi: 10.7554/eLife.18919 (PMC5179194; doi:10.7554/eLife.18919)
Supplement: Figure 4—source data 1. — DOI: http://dx.doi.org/10.7554/eLife.18919.020 [file elife-18919-fig4-data1.xlsx]

## Sheet: Sheet1
Figure 4 - source data 1
Belonging to Figure 4B
Normalized ChIP-qPCR data on HO promoter
	H3K79me1/H3						H3K79me3/H3
slx8d	0.714524	1.01654	0.681715	0.340238			0.995478	0.918897	1.80128	1.41989
mms21dSL	0.675103	0.833565	0.502428	0.831094	0.375818	0.458098	1.04598	1.60884	1.3674	1.73832	1.70344	1.31223
