# Supplementary material for: Direct screening for chromatin status on DNA barcodes in yeast delineates the regulome of H3K79 methylation by Dot1
Source: eLife. 2016 Dec 6;5:e18919. doi: 10.7554/eLife.18919 (PMC5179194; doi:10.7554/eLife.18919)
Supplement: Figure 4—source data 2. — DOI: http://dx.doi.org/10.7554/eLife.18919.021 [file elife-18919-fig4-data2.xlsx]

## Sheet: Sheet1
Figure 4 - source data 2
Belonging to Figure 4C
Raw MS data percentages
	H3K79me0				H3K79me1				H3K79me2				H3K79me3
WT	0.176658	0.155924	0.144318	0.164615	0.128767	0.121773	0.127782	0.123738	0.217617	0.221955	0.236125	0.222325	0.476958	0.500348	0.491775	0.489322
slx5	0.120422	0.124374	0.131808	0.151515	0.123871	0.125027	0.131785	0.122951	0.23685	0.222925	0.220532	0.235128	0.518857	0.527674	0.515875	0.490406
slx8	0.108529	0.118734	0.117596	0.13173	0.11143	0.107621	0.115885	0.127284	0.225942	0.215712	0.223248	0.216308	0.554099	0.557932	0.543271	0.524678
mms21	0.105591	0.105576	0.177695	0.0444356	0.077303	0.124761	0.112952	0.137683	0.240165	0.227357	0.195821	0.234117	0.576941	0.542305	0.513532	0.583764
