# Supplementary material for: Direct screening for chromatin status on DNA barcodes in yeast delineates the regulome of H3K79 methylation by Dot1
Source: eLife. 2016 Dec 6;5:e18919. doi: 10.7554/eLife.18919 (PMC5179194; doi:10.7554/eLife.18919)
Supplement: Figure 5—source data 1. — DOI: http://dx.doi.org/10.7554/eLife.18919.025 [file elife-18919-fig5-data1.xlsx]

## Sheet: Sheet1
Figure 5 - source data 1
Belongs to Figure 5A
Raw MS data percentages
	Wild-type (BY4702)		gcn5d (NKI1107)
H3K79me0	0.130319	0.104114	0.105063	0.086137
H3K79me1	0.198141	0.167147	0.148693	0.129735
H3K79me2	0.266181	0.248412	0.224667	0.203398
H3K79me3	0.405358	0.480326	0.521577	0.58073
