# Supplementary material for: Direct screening for chromatin status on DNA barcodes in yeast delineates the regulome of H3K79 methylation by Dot1
Source: eLife. 2016 Dec 6;5:e18919. doi: 10.7554/eLife.18919 (PMC5179194; doi:10.7554/eLife.18919)
Supplement: Figure 5—source data 2. — DOI: http://dx.doi.org/10.7554/eLife.18919.026 [file elife-18919-fig5-data2.xlsx]

## Sheet: Readme
Figure 5 - source data 2
Belonging to Figure 5B, 5C, 5-S1A, 5-S1B, 5-S1C
Raw data from custom Epi-ID experiment with gcn5d strain and Gcn5 rescue plasmids
5 sheets
5B-C_UpTag	Data underlying the plots shown in 5B (and 5-S1A) and 5C (and 5-S1B)
5B-C_DownTag	Data underlying the plots shown in 5B (and 5-S1A) and 5C (and 5-S1B)
5-S1C	Data underlying the plots shown in 5-S1C
Raw data_5B+5C_UpTag	Raw counts used to calculate the values in "5B-C_UpTag"
Raw data_5B+5C_DownTag	Raw counts used to calculate the values in "5B-C_DownTag"

## Sheet: 5B-C_UpTag
Plate	ORF	Gene	TAG	K79me3_over_K79me1	K79me1_over_H3	K79me3_over_H3	K4me3_over_H3	K36me3_over_H3	H2Bub_over_H3	H3	input
1	SET1_pRS315	SET1	UPTAG0131	1.72133	1.32361	2.26118	0.0347904	1.10275	1.75658	1.52951	2.03352
1	SET2_pRS315	SET2	UPTAG0530	1.43931	0.576241	0.823124	0.949325	0.519813	0.673096	1.05265	1.21053
1	WT_pRS315	WT	UPTAG0577	0.844485	1.06268	0.89064	0.835525	1.189	1.04456	1.41179	1.38725
1	WT_pRS315	WT	UPTAG0579	0.99353	0.857342	0.845364	0.711891	1.02762	0.833801	0.978181	0.866068
1	WT_pRS315	WT	UPTAG0580	0.991409	1.13432	1.11608	1.02797	1.27552	0.995172	0.760855	0.778063
1	WT_pRS315	WT	UPTAG0581	1.12503	1.45642	1.62615	1.25296	1.22841	1.414	0.724447	0.795322
1	WT_pRS315	WT	UPTAG0582	0.965118	1.31584	1.26035	1.26307	0.890236	1.36186	1.16074	1.366
1	DOT1_pRS315	DOT1	UPTAG0640	2.77087	0.133999	0.368491	0.871025	1.02005	1.06481	1.02681	1.06105
1	DOT1_pRS315	DOT1	UPTAG0641	3.40928	0.0864859	0.292629	1.24879	0.827199	0.853359	0.921661	0.929254
1	DOT1_pRS315	DOT1	UPTAG0642	3.13726	0.148299	0.461742	1.14598	0.866792	1.11894	0.896001	1.03252
1	BRE1_pRS315	BRE1	UPTAG0643	0.39288	0.801522	0.312524	0.029167	0.70999	0.429892	0.382898	0.400513
1	BRE1_pRS315	BRE1	UPTAG0644	0.577789	1.04002	0.596375	0.544057	0.932663	0.769901	0.358279	0.429325
1	BRE1_pRS315	BRE1	UPTAG0645	0.214426	2.0272	0.431402	0.0454423	1.01983	0.629246	0.328372	0.471687
1	DOT1OE_pRS315	DOT1OE	UPTAG0646	35.6493	0.290714	10.2855	1.59668	1.83091	4.16647	0.665066	0.700185
1	DOT1OE_pRS315	DOT1OE	UPTAG0647	32.506	0.301033	9.71148	0.71741	1.68057	3.57229	0.54171	0.66524
1	DOT1OE_pRS315	DOT1OE	UPTAG0648	26.0697	0.34705	8.97917	0.681882	1.45557	2.55405	0.614527	0.658679
1	UBP8_pRS315	UBP8	UPTAG0649	5.02072	0.548678	2.73396	1.05945	1.23701	2.29151	0.158031	0.162316
1	UBP8_pRS315	UBP8	UPTAG0650	2.55126	1.08869	2.75655	1.4426	1.4468	2.77088	0.707023	0.782342
1	UBP8_pRS315	UBP8	UPTAG0651	2.75467	0.950813	2.5994	1.24681	0.960573	2.32784	0.453809	0.46156
1	GCN5_pRS315	GCN5	UPTAG0653	11.6496	0.533854	6.17225	1.28776	2.26152	2.14246	0.0759382	0.0864356
1	GCN5_pRS315	GCN5	UPTAG0654	8.52091	0.545468	4.61279	1.34733	1.95197	2.12284	0.075158	0.082014
1	GCN5_pTW142	GCN5	UPTAG0655	1.07391	1.03662	1.10483	0.920244	1.01322	1.08077	0.793016	0.75567
1	GCN5_pTW142	GCN5	UPTAG0656	1.14893	1.04367	1.19004	1.18654	1.18955	1.06822	1.11073	1.31707
1	GCN5_pTW143	GCN5	UPTAG0658	9.29218	0.540923	4.9884	1.39163	1.80676	1.62583	0.089288	0.0929967
1	GCN5_pTW143	GCN5	UPTAG0659	11.1632	0.419016	4.64225	1.43654	2.0535	1.62639	0.108186	0.102838
1	GCN5_pTW143	GCN5	UPTAG0660	13.5949	0.38205	5.1547	1.54593	2.12104	1.85912	0.0812261	0.0927115
1	WT_pRS315	WT	UPTAG0769	0.830892	0.962158	0.793412	0.877822	0.859897	0.832303	1.3551	1.18514
1	WT_pRS315	WT	UPTAG0771	1.27536	1.03362	1.30828	1.50644	0.994122	1.18935	1.47629	1.43218
1	WT_pRS315	WT	UPTAG0772	1.07167	1.21208	1.28915	0.992085	1.24067	1.1583	0.908137	0.966339
1	WT_pRS315	WT	UPTAG0773	0.846183	0.679207	0.570394	0.656949	0.804073	0.751551	0.877277	0.754671
1	WT_pRS315	WT	UPTAG0774	1.05632	0.286334	0.300175	0.875281	0.490444	0.419098	0.347183	0.468977
1	DOT1_pRS315	DOT1	UPTAG0832	3.07223	0.0788128	0.240303	1.36964	0.871891	0.850061	0.995952	0.922693
1	DOT1_pRS315	DOT1	UPTAG0833	2.9727	0.120381	0.355155	0.874551	0.829504	0.927969	1.02482	0.960633
1	DOT1_pRS315	DOT1	UPTAG0834	3.16322	0.109499	0.343754	1.26253	0.857638	0.938438	0.969685	0.942662
1	BRE1_pRS315	BRE1	UPTAG0835	0.319382	1.52021	0.481861	0.0381811	0.655987	0.650059	0.422775	0.437455
1	BRE1_pRS315	BRE1	UPTAG0836	0.259602	1.44547	0.372413	0.0372437	0.896606	0.648065	0.405697	0.422479
1	BRE1_pRS315	BRE1	UPTAG0837	0.306929	1.71628	0.522798	0.0500289	0.915245	0.730283	0.302019	0.446299
1	DOT1OE_pRS315	DOT1OE	UPTAG0838	29.335	0.257376	7.4931	0.624286	1.33231	1.82489	0.242031	0.338325
1	DOT1OE_pRS315	DOT1OE	UPTAG0839	23.4857	0.296903	6.92034	0.400559	1.1865	2.2599	0.748806	0.762516
1	DOT1OE_pRS315	DOT1OE	UPTAG0840	21.8526	0.33861	7.34362	0.476045	1.25796	2.22669	0.862106	0.851091
1	UBP8_pRS315	UBP8	UPTAG0841	4.14295	0.725478	2.98293	0.955119	0.889711	2.2042	0.173722	0.183283
1	UBP8_pRS315	UBP8	UPTAG0842	3.75793	0.447401	1.66861	0.858729	0.698534	1.45297	0.214205	0.177721
1	UBP8_pRS315	UBP8	UPTAG0843	2.53868	0.635281	1.6006	1.38058	1.13021	1.82858	0.720632	0.708458
1	GCN5_pRS315	GCN5	UPTAG0844	7.68505	0.460616	3.51313	1.44995	1.70431	1.56	0.0919753	0.0848666
1	GCN5_pRS315	GCN5	UPTAG0845	11.5178	0.476361	5.44518	1.31796	2.89229	2.19201	0.0777586	0.0918557
1	GCN5_pRS315	GCN5	UPTAG0846	9.60707	0.443233	4.22602	1.6844	2.52509	1.87909	0.0923221	0.0895735
1	GCN5_pTW142	GCN5	UPTAG0847	1.23551	0.930096	1.14046	0.888317	1.02066	0.9635	0.744818	0.778491
1	GCN5_pTW142	GCN5	UPTAG0848	0.948682	0.888369	0.836416	0.8113	1.13194	0.96079	0.534081	0.633148
1	GCN5_pTW142	GCN5	UPTAG0849	1.45259	0.902403	1.30092	0.976096	1.31245	1.06393	0.973586	1.08501
1	GCN5_pTW143	GCN5	UPTAG0850	16.0195	0.295628	4.70004	1.84087	2.0268	1.40945	0.0882478	0.0979889
1	GCN5_pTW143	GCN5	UPTAG0851	8.49989	0.497601	4.19762	1.28978	1.8506	1.54716	0.112347	0.112395
1	GCN5_pTW143	GCN5	UPTAG0852	12.7563	0.648515	8.21017	2.20516	2.94612	2.85695	0.0657957	0.0924262

## Sheet: 5B-C_DownTag
Plate	ORF	Gene	TAG	K79me3_over_K79me1	K79me1_over_H3	K79me3_over_H3	K4me3_over_H3	K36me3_over_H3	H2Bub_over_H3	H3	input
1	SET1_pRS315	SET1	DNTAG0131	0.383604	3.13818	2.17701	0.114463	0.802555	1.34562	2.29961	2.2225
1	SET2_pRS315	SET2	DNTAG0530	0.610119	0.515667	0.56896	1.69779	0.253789	0.684808	1.27908	1.1827
1	WT_pRS315	WT	DNTAG0577	2.46193	0.130398	0.580558	0.80909	0.728151	0.700253	1.3224	1.32534
1	WT_pRS315	WT	DNTAG0579	0.502731	1.49512	1.35928	1.16205	1.32313	1.25471	1.01783	0.957877
1	WT_pRS315	WT	DNTAG0580	0.5234	2.00317	1.89605	1.05594	1.35343	1.29931	0.736012	0.795644
1	WT_pRS315	WT	DNTAG0581	0.458912	2.00133	1.66091	0.972198	1.16126	1.33404	0.818541	0.789369
1	WT_pRS315	WT	DNTAG0582	0.406465	2.32627	1.70995	1.15057	1.08044	1.33466	1.23236	1.28836
1	DOT1_pRS315	DOT1	DNTAG0640	1.19677	0.0145248	0.0314354	0.772094	0.367327	0.227648	0.890406	0.702952
1	DOT1_pRS315	DOT1	DNTAG0641	2.56451	0.0198742	0.0921707	0.754599	0.401352	0.333094	0.867653	0.766556
1	DOT1_pRS315	DOT1	DNTAG0642	2.25677	0.0401888	0.164018	0.920004	0.617443	0.52059	1.07268	0.95016
1	BRE1_pRS315	BRE1	DNTAG0643	1.0258	0.0712822	0.132234	0.112879	0.37632	0.273874	0.302389	0.413681
1	BRE1_pRS315	BRE1	DNTAG0644	2.30806	0.0205527	0.0857857	0.380923	0.384833	0.236039	0.419504	0.339052
1	BRE1_pRS315	BRE1	DNTAG0645	0.550895	0.325037	0.323817	0.108963	0.425694	0.44094	0.358102	0.376621
1	DOT1OE_pRS315	DOT1OE	DNTAG0646	1.84808	0.364081	1.21679	0.524446	0.793298	0.800273	0.745966	0.612889
1	DOT1OE_pRS315	DOT1OE	DNTAG0647	2.26428	1.16286	4.7616	0.418613	1.0375	1.29692	0.759984	0.686415
1	DOT1OE_pRS315	DOT1OE	DNTAG0648	2.87225	0.0396574	0.20599	0.451941	0.433023	0.320519	0.543527	0.465158
1	UBP8_pRS315	UBP8	DNTAG0649	2.1086	0.159721	0.609051	1.24631	0.754238	0.873239	0.242916	0.168848
1	UBP8_pRS315	UBP8	DNTAG0650	0.638146	0.456217	0.526489	1.31132	0.878422	1.1511	0.81265	0.719065
1	UBP8_pRS315	UBP8	DNTAG0651	1.25894	0.120246	0.273763	0.990728	0.895212	0.891557	0.394365	0.348296
1	GCN5_pRS315	GCN5	DNTAG0653	0.777124	1.3454	1.89078	0.579393	1.25119	1.52035	0.105739	0.0835333
1	GCN5_pRS315	GCN5	DNTAG0654	1.53871	0.578089	1.6086	0.751449	1.25563	1.01303	0.0894875	0.0928619
1	GCN5_pTW142	GCN5	DNTAG0655	0.809845	0.219829	0.321947	0.956399	0.774215	0.643487	0.745204	0.746372
1	GCN5_pTW142	GCN5	DNTAG0656	0.698524	0.508541	0.6424	1.19926	1.05653	0.829639	0.890101	1.08687
1	GCN5_pTW143	GCN5	DNTAG0658	2.69274	0.160156	0.779894	0.569007	0.89736	0.757369	0.107669	0.0869255
1	GCN5_pTW143	GCN5	DNTAG0659	1.09908	0.287043	0.570523	0.58067	0.856794	0.648736	0.10513	0.0821764
1	GCN5_pTW143	GCN5	DNTAG0660	0.679249	1.65472	2.0326	0.642371	1.92297	1.57655	0.0963946	0.0980351
1	WT_pRS315	WT	DNTAG0769	0.941656	0.507141	0.863614	1.18477	1.18077	1.13527	1.08807	1.30583
1	WT_pRS315	WT	DNTAG0771	0.609299	0.933178	1.02824	1.0669	1.04639	1.19873	1.30275	1.30414
1	WT_pRS315	WT	DNTAG0772	2.56451	0.00997917	0.0462804	0.574528	0.232411	0.135076	0.863996	0.728479
1	WT_pRS315	WT	DNTAG0773	0.895543	0.368141	0.59621	1.02609	0.934081	0.877097	0.737739	0.766047
1	WT_pRS315	WT	DNTAG0774	0.635553	0.22527	0.258913	0.997864	0.95993	0.730845	0.880299	0.73891
1	DOT1_pRS315	DOT1	DNTAG0832	2.23112	0.0970921	0.391747	1.0149	0.850728	0.809045	0.888019	0.957029
1	DOT1_pRS315	DOT1	DNTAG0833	0.712364	0.227805	0.29347	1.41455	1.14223	1.20179	0.681263	0.660973
1	DOT1_pRS315	DOT1	DNTAG0834	3.0297	0.20749	1.13683	0.982331	0.999066	1.22178	0.893402	1.03505
1	BRE1_pRS315	BRE1	DNTAG0835	1.22307	0.152036	0.336277	0.0880476	0.549463	0.398772	0.368615	0.384677
1	BRE1_pRS315	BRE1	DNTAG0836	#NUM!	0	0.148551	0.0668358	0.203845	0.0393438	0.0807521	0.215406
1	BRE1_pRS315	BRE1	DNTAG0837	0.892004	0.604709	0.975465	0.111425	0.771952	0.483441	0.327935	0.428013
1	DOT1OE_pRS315	DOT1OE	DNTAG0838	#NUM!	0	0.241375	0.316991	0.205352	0.0732269	0.182225	0.297582
1	DOT1OE_pRS315	DOT1OE	DNTAG0839	2.35645	1.36472	5.81565	0.633629	1.31114	1.63611	0.669683	0.757991
1	DOT1OE_pRS315	DOT1OE	DNTAG0840	1.85852	1.64377	5.52465	0.72414	1.16036	1.73542	0.668769	0.696422
1	UBP8_pRS315	UBP8	DNTAG0841	0.586174	0.702174	0.744336	1.26839	0.796971	1.31392	0.214882	0.166812
1	UBP8_pRS315	UBP8	DNTAG0842	1.60709	0.26839	0.78002	1.1606	0.802025	1.07118	0.240936	0.193102
1	UBP8_pRS315	UBP8	DNTAG0843	0.825103	0.297335	0.443663	1.29992	1.0038	1.18282	0.666941	0.561921
1	GCN5_pRS315	GCN5	DNTAG0844	0.341935	0.718331	0.444187	0.578612	1.16793	0.917616	0.108025	0.0830245
1	GCN5_pRS315	GCN5	DNTAG0845	1.12838	0.226233	0.461649	0.585603	0.847744	0.753615	0.0952773	0.0809892
1	GCN5_pRS315	GCN5	DNTAG0846	0.809845	0.842619	1.23405	0.688771	1.6776	1.22782	0.0972072	0.091505
1	GCN5_pTW142	GCN5	DNTAG0847	1.0258	0.0119452	0.0221594	0.496338	0.088956	0.0721876	0.360896	0.409186
1	GCN5_pTW142	GCN5	DNTAG0848	0.582128	1.1429	1.20316	1.25884	1.39103	1.24604	0.614833	0.669963
1	GCN5_pTW142	GCN5	DNTAG0849	0.590512	0.810235	0.865243	1.20917	1.32337	0.998875	0.80874	0.947616
1	GCN5_pTW143	GCN5	DNTAG0850	0.865522	0.707357	1.10717	0.621547	1.43121	0.981793	0.0975119	0.0802259
1	GCN5_pTW143	GCN5	DNTAG0851	0.543987	1.17251	1.15346	0.742378	1.53702	1.34767	0.121331	0.103208
1	GCN5_pTW143	GCN5	DNTAG0852	0.482281	2.75407	2.402	0.798355	1.57735	1.31576	0.104876	0.0911658

## Sheet: 5-S1C
Individual data points from the plot shown in 5-S1C
strain	plasmid	K79me1/H3					K79me3/H3
WT	empty (pRS315)	1.00025	0.92074	0.949561	1.07931	1.05014	0.97923	1.25948	1.02814	0.85648	0.876673		0.5	0.5	0.5	0.5	0.5	1	1	1	1	1
gcn5d	empty (pRS315)	0.579325	0.510988	0.430388			2.54016	2.51188	2.54156				2	2	2			2.5	2.5	2.5
gcn5d	GCN5 (pTW142)	0.938434	0.831123	0.937772			0.950001	0.693269	1.3681				3.5	3.5	3.5			4	4	4
gcn5d	gcn5-F221A (pTW143)	0.442569	0.483727	0.412682			2.76178	2.16038	3.07097				5	5	5			5.5	5.5	5.5

## Sheet: Raw data_5B+5C_UpTag
	1_K79me1	1_K79me3	1_K4me3	1_K36me3	1_H2Bub	1_H3	1_input
UPTAG0131	26617	13208	567	9232	23912	17644	14257
UPTAG0385	3331	1198	2310	1445	2169	2498	1720
UPTAG0481	19512	4439	8868	6060	10000	14690	9504
UPTAG0530	7975	3309	10648	2995	6306	12143	8487
UPTAG0577	19725	4802	12569	9188	13125	16286	9726
UPTAG0578	21	16	0	12	0	0	1
UPTAG0579	11026	3158	7420	5502	7259	11284	6072
UPTAG0580	11347	3243	8334	5312	6739	8777	5455
UPTAG0581	13872	4499	9672	4871	9117	8357	5576
UPTAG0582	20081	5587	15622	5656	14069	13390	9577
UPTAG0583	3980	2526	3737	2073	2746	3590	2337
UPTAG0584	3904	2212	4873	2153	3059	3560	2543
UPTAG0585	12	28	64	15	19	67	87
UPTAG0586	21764	6304	15302	8896	14138	15317	10674
UPTAG0587	3952	1316	7907	1987	3052	7570	7230
UPTAG0589	10317	3392	7618	4534	6611	10401	7241
UPTAG0590	12762	3819	8042	4627	7092	10391	6452
UPTAG0591	14605	5062	9784	5340	8923	11477	7177
UPTAG0593	2281	1396	1279	1562	1719	2195	1744
UPTAG0594	1974	1394	1959	1142	1475	2218	1934
UPTAG0595	12199	3766	13516	3746	7331	9165	5905
UPTAG0596	6839	2755	11968	3873	6067	9662	6568
UPTAG0597	7995	4318	13583	6398	8395	11977	7454
UPTAG0598	11364	4622	16958	8189	8777	10763	6529
UPTAG0599	11494	2220	4596	4817	5693	8644	6054
UPTAG0601	12573	4377	9124	5617	8389	10194	6864
UPTAG0602	9830	4084	8633	6257	7250	9535	5786
UPTAG0603	9159	4297	10724	5974	7597	9365	6132
UPTAG0604	3361	2245	4559	2590	2891	5102	4164
UPTAG0605	5652	3184	2795	3666	4331	6223	4615
UPTAG0606	4077	1997	3821	2509	2844	3270	2787
UPTAG0607	3660	1658	5375	2063	3135	5594	4865
UPTAG0608	11954	5767	11083	4240	10164	9781	7189
UPTAG0609	15713	7904	14492	6597	11958	12350	8554
UPTAG0610	6162	1735	4916	2968	3673	5023	2920
UPTAG0611	4110	803	2531	1407	2744	2625	1958
UPTAG0612	7882	2012	4896	2727	4875	7300	3676
UPTAG0613	5321	2018	6107	2860	3671	5361	3263
UPTAG0614	3711	1527	3309	1874	3037	2907	2318
UPTAG0615	3159	1636	3520	1940	2553	2684	1907
UPTAG0616	6675	3774	9376	3820	5649	6199	4450
UPTAG0617	6405	3168	8142	2656	5215	3884	3650
UPTAG0618	10035	4740	12197	6474	7867	6802	5437
UPTAG0619	1004	686	1589	739	909	863	597
UPTAG0620	481	531	1172	491	482	765	540
UPTAG0621	944	885	1485	757	949	1105	904
UPTAG0622	8611	3208	8105	4705	5922	7575	4807
UPTAG0623	6489	2031	4843	3491	4908	7152	4488
UPTAG0624	0	0	0	1	0	2	10
UPTAG0625	2271	1169	2629	1265	1932	1882	1364
UPTAG0626	856	491	1202	633	626	781	558
UPTAG0627	2843	1873	3565	1599	2390	2748	1886
UPTAG0628	2348	1085	3046	1407	1667	2749	1588
UPTAG0629	2982	2309	5573	3026	3731	4087	2303
UPTAG0630	3585	2489	6097	1829	3981	3398	2100
UPTAG0631	1702	1230	2703	1573	1517	1276	1191
UPTAG0632	1941	1121	1787	1328	1627	1858	1242
UPTAG0633	1875	1580	3742	1873	1951	1885	1230
UPTAG0634	240	181	931	238	278	780	834
UPTAG0635	6757	1755	4315	1648	4047	4435	2518
UPTAG0636	523	306	1176	469	545	922	744
UPTAG0637	3699	2098	5263	2816	3078	4996	2873
UPTAG0638	5698	2278	5461	3130	4628	5346	3267
UPTAG0639	4935	2105	3388	3092	3990	4730	3438
UPTAG0640	1809	1445	9530	5733	9731	11845	7439
UPTAG0641	1048	1030	12264	4173	7000	10632	6515
UPTAG0642	1747	1580	10941	4251	8923	10336	7239
UPTAG0643	4035	457	119	1488	1465	4417	2808
UPTAG0644	4899	816	2077	1829	2455	4133	3010
UPTAG0645	8752	541	159	1833	1839	3788	3307
UPTAG0646	2542	26124	11315	6665	24662	7672	4909
UPTAG0647	2144	20091	4141	4983	17223	6249	4664
UPTAG0648	2804	21073	4465	4896	13969	7089	4618
UPTAG0649	1140	1650	1784	1070	3223	1823	1138
UPTAG0650	10120	7443	10868	5599	17436	8156	5485
UPTAG0651	5673	4505	6029	2386	9402	5235	3236
UPTAG0652	2597	509	1118	814	1756	1433	1087
UPTAG0653	533	1790	1042	940	1448	876	606
UPTAG0654	539	1324	1079	803	1420	867	575
UPTAG0655	10808	3346	7776	4398	7628	9148	5298
UPTAG0656	15241	5048	14043	7232	10560	12813	9234
UPTAG0657	3076	759	1607	1024	1814	2066	1620
UPTAG0658	635	1701	1324	883	1292	1030	652
UPTAG0659	596	1918	1656	1216	1566	1248	721
UPTAG0660	408	1599	1338	943	1344	937	650
UPTAG0661	2332	1295	5419	1496	2130	2153	1700
UPTAG0662	4023	1113	2087	1426	3522	2220	1957
UPTAG0663	7768	2624	7467	2712	6420	7057	4391
UPTAG0664	4707	1942	4517	2131	4063	3759	2671
UPTAG0665	3884	1564	4869	2294	3062	3910	2405
UPTAG0666	4122	1762	3364	2142	2691	3169	2306
UPTAG0667	1378	369	402	651	876	938	647
UPTAG0668	2972	1003	2547	1510	2431	2480	1687
UPTAG0669	980	768	1654	1063	1142	973	666
UPTAG0670	2466	1273	1911	1263	1991	2082	1440
UPTAG0671	814	524	3084	977	891	2504	1517
UPTAG0672	3860	1587	4525	2103	3117	3951	2522
UPTAG0769	17142	4106	12675	6378	10038	15632	8309
UPTAG0771	20062	7376	23697	8033	15627	17030	10041
UPTAG0772	14472	4471	9600	6167	9362	10476	6775
UPTAG0773	7834	1911	6141	3861	5868	10120	5291
UPTAG0774	1307	398	3238	932	1295	4005	3288
UPTAG0775	3127	1963	2910	1807	2601	2872	2324
UPTAG0776	4438	2578	5597	2183	3770	4441	2882
UPTAG0777	2996	999	3676	1771	2449	3442	2009
UPTAG0778	26483	4436	10501	7350	12459	16118	10577
UPTAG0779	16187	5570	11398	6617	12090	13239	10305
UPTAG0780	18213	5232	15636	7127	12502	16631	9777
UPTAG0781	8582	2658	5951	3715	5674	7024	5105
UPTAG0782	12917	4709	6411	4950	8608	8532	7392
UPTAG0783	8791	3601	8566	4391	7045	10506	7617
UPTAG0784	4982	3099	6277	3235	4332	5655	3673
UPTAG0785	3911	2390	5281	1548	3367	2923	2514
UPTAG0786	2361	1809	1508	1403	2012	2057	1798
UPTAG0787	8921	3755	10781	4717	6973	8877	6655
UPTAG0788	11037	4136	13756	4847	8086	10284	7012
UPTAG0789	9685	4889	16741	5532	8437	11597	7704
UPTAG0790	12129	3056	5461	4924	6956	9711	6607
UPTAG0791	8992	3344	12689	6133	6896	7644	6615
UPTAG0792	10642	3201	8481	5473	6657	9144	6415
UPTAG0793	8595	2461	5423	5640	4989	9096	5684
UPTAG0794	9823	2757	7783	5224	6562	8561	6007
UPTAG0795	12247	4468	8596	5495	8443	9475	6641
UPTAG0796	6458	4315	4634	4918	5553	6236	4695
UPTAG0797	4713	4702	4161	4228	5129	6251	3937
UPTAG0798	8155	3579	2491	5336	5338	7570	4870
UPTAG0799	12283	5290	12354	5156	8884	11174	7797
UPTAG0800	13127	6374	9895	5626	9668	13315	7991
UPTAG0801	15763	5192	11779	6774	9948	14435	8942
UPTAG0802	3443	1239	3478	1437	2210	4296	2962
UPTAG0803	6511	1338	3291	2556	3874	5877	3757
UPTAG0804	3478	702	2742	1734	2030	3973	2011
UPTAG0805	883	682	2114	749	1040	1561	1236
UPTAG0806	2166	746	1339	1167	1384	2100	1440
UPTAG0807	1276	836	2445	1015	1337	1961	1009
UPTAG0808	92	71	1283	213	239	811	837
UPTAG0809	3417	2608	5015	2368	3101	3612	2480
UPTAG0810	6885	3298	7737	3684	5176	5975	4239
UPTAG0811	1467	305	518	643	648	1268	604
UPTAG0812	2047	918	2161	1020	1407	2221	1240
UPTAG0813	1865	1438	2547	1574	1275	2044	1144
UPTAG0814	985	623	1024	613	879	924	539
UPTAG0815	5228	2034	5679	2450	3419	3277	3127
UPTAG0816	11159	2333	3530	4563	5224	8668	5377
UPTAG0817	1047	703	1786	843	977	1473	912
UPTAG0818	1241	1142	2587	1092	1291	1614	1056
UPTAG0819	1439	661	2167	1450	1260	2061	1167
UPTAG0820	5694	2350	7298	3500	4612	5202	2631
UPTAG0821	5185	2385	9570	3927	4794	10056	4973
UPTAG0822	9077	4417	8673	5276	7590	9036	6234
UPTAG0823	2404	1525	3420	1574	1828	2423	1393
UPTAG0824	1084	729	2022	982	900	1978	1128
UPTAG0825	821	1145	2750	1289	1017	1104	610
UPTAG0826	958	407	934	594	550	973	608
UPTAG0827	2202	1227	2274	1339	1514	2108	1343
UPTAG0828	1782	980	2260	1045	1463	1603	1017
UPTAG0829	4417	1988	3993	2041	2790	3612	2268
UPTAG0830	3923	1789	5542	2651	3303	3480	2856
UPTAG0831	4403	1836	3067	2358	3295	3338	2669
UPTAG0832	1032	914	14535	4753	7535	11489	6469
UPTAG0833	1622	1390	9550	4653	8464	11822	6735
UPTAG0834	1396	1273	13045	4552	8099	11186	6609
UPTAG0835	8450	778	172	1518	2446	4877	3067
UPTAG0836	7710	577	161	1991	2340	4680	2962
UPTAG0837	6815	603	161	1513	1963	3484	3129
UPTAG0838	819	6926	1610	1765	3931	2792	2372
UPTAG0839	2923	19790	3196	4863	15061	8638	5346
UPTAG0840	3838	24178	4373	5936	17085	9945	5967
UPTAG0841	1657	1979	1768	846	3408	2004	1285
UPTAG0842	1260	1365	1960	819	2770	2471	1246
UPTAG0843	6019	4405	10601	4458	11728	8313	4967
UPTAG0844	557	1234	1421	858	1277	1061	595
UPTAG0845	487	1617	1092	1231	1517	897	644
UPTAG0846	538	1490	1657	1276	1544	1065	628
UPTAG0847	9108	3244	7050	4161	6387	8592	5458
UPTAG0848	6238	1706	4617	3309	4567	6161	4439
UPTAG0849	11551	4837	10126	6994	9219	11231	7607
UPTAG0850	343	1584	1731	979	1107	1018	687
UPTAG0851	735	1801	1544	1138	1547	1296	788
UPTAG0852	561	2063	1546	1061	1673	759	648
UPTAG0853	4922	2643	8000	2510	5641	5735	3753
UPTAG0854	12268	4930	13012	4573	9845	10837	6685
UPTAG0855	6297	3385	8997	3581	6620	6987	4889
UPTAG0856	3152	1295	5195	2319	3047	3795	2045
UPTAG0857	3789	1901	5153	2492	2810	3779	2513
UPTAG0858	4313	1880	4324	2325	3104	3801	2404
UPTAG0859	844	534	689	492	635	785	552
UPTAG0860	836	419	1291	430	655	468	490
UPTAG0861	292	439	648	575	534	674	466
UPTAG0862	1833	948	2189	1509	1476	2152	1518
UPTAG0863	2720	1228	3236	1539	2117	2228	1522
UPTAG0864	562	313	1853	547	744	1211	964

## Sheet: Raw data_5B+5C_DownTag
	1_K79me1	1_K79me3	1_K4me3	1_K36me3	1_H2Bub	1_H3	1_input
DNTAG0131	1674	1252	3609	18051	29219	45279	26207
DNTAG0385	28	52	2638	1436	1514	3242	1771
DNTAG0481	777	673	20210	13898	15845	20324	15689
DNTAG0530	153	182	29775	3175	8271	25185	13946
DNTAG0577	40	192	14670	9418	8744	26038	15628
DNTAG0578	0	1	0	21	15	0	3
DNTAG0579	353	346	16217	13172	12059	20041	11295
DNTAG0580	342	349	10656	9743	9030	14492	9382
DNTAG0581	380	340	10911	9297	10311	16117	9308
DNTAG0582	665	527	19441	13023	15531	24265	15192
DNTAG0583	38	61	10324	3229	2433	6099	3589
DNTAG0584	35	50	11208	3238	2429	6396	4593
DNTAG0585	59	61	4508	2100	2584	5917	3573
DNTAG0586	1145	819	26470	20005	19915	27802	18784
DNTAG0587	334	366	21001	11982	14283	28525	16625
DNTAG0589	713	607	26218	13245	12158	17877	11443
DNTAG0590	189	250	24552	10039	7524	17495	11764
DNTAG0591	37	91	25851	7273	5882	19344	12144
DNTAG0593	28	56	6021	2208	1594	4312	2989
DNTAG0594	104	85	8873	3772	2789	5493	3606
DNTAG0595	453	507	14429	9549	10827	13989	11464
DNTAG0596	179	283	15848	8977	9900	18088	12608
DNTAG0597	24	53	20194	5681	4829	23738	14500
DNTAG0598	181	217	18509	13263	9477	19627	10252
DNTAG0599	50	102	19635	9313	6020	17804	10052
DNTAG0600	77	90	15217	8046	5989	17688	10227
DNTAG0601	7	27	13637	4036	2180	19423	9725
DNTAG0602	311	252	18161	12168	9298	16757	10584
DNTAG0603	247	262	14959	11834	8041	16072	9341
DNTAG0604	90	162	16291	6547	5257	14437	9464
DNTAG0605	118	115	13903	6178	5073	10607	7996
DNTAG0606	33	85	8253	4220	3056	7555	4963
DNTAG0607	319	403	24210	10991	9847	17350	12765
DNTAG0608	97	132	20984	7963	6477	18104	13063
DNTAG0609	224	310	22316	10775	9485	17837	12820
DNTAG0610	1	18	4465	1457	1213	7255	4358
DNTAG0611	64	66	4285	2342	2527	5526	3804
DNTAG0612	39	72	8193	4692	3941	10723	7488
DNTAG0613	86	88	5884	4076	2176	1690	2631
DNTAG0614	58	68	3890	2936	2517	4487	2992
DNTAG0615	0	2	1471	435	171	3449	2524
DNTAG0616	0	6	1983	341	261	5728	3896
DNTAG0617	94	176	6030	4200	4520	7472	4752
DNTAG0618	189	207	8877	6776	6581	10436	8700
DNTAG0619	30	23	1249	1130	911	1512	1120
DNTAG0620	8	2	1072	851	530	1462	972
DNTAG0621	5	18	2074	1363	648	2049	1393
DNTAG0622	178	140	8039	7400	7449	10219	8961
DNTAG0623	224	275	10285	8893	7854	15640	9140
DNTAG0624	137	133	11885	9105	7529	13804	9330
DNTAG0625	10	43	2504	2323	1424	2977	1691
DNTAG0626	32	35	1444	1235	1084	1755	1005
DNTAG0627	59	72	3632	3604	1801	3910	2519
DNTAG0628	1	8	3143	1062	454	3053	2436
DNTAG0629	114	162	6463	6570	4192	6971	4478
DNTAG0630	87	86	6703	5387	3129	6722	3905
DNTAG0631	15	44	2823	2562	1272	3026	2003
DNTAG0632	13	23	2977	2210	936	2548	1515
DNTAG0633	23	68	3588	2548	1296	3538	1882
DNTAG0634	1	3	2005	928	592	2872	1871
DNTAG0635	13	31	4814	2781	2448	7315	3852
DNTAG0636	6	19	2168	1374	725	2799	1861
DNTAG0637	78	60	6427	4565	2788	6897	4924
DNTAG0638	4	24	4103	2753	1200	6331	3549
DNTAG0639	5	5	4748	1519	708	8205	4109
DNTAG0640	3	7	9426	3199	1914	17532	8289
DNTAG0641	4	20	8977	3406	2729	17084	9039
DNTAG0642	10	44	13531	6478	5273	21121	11204
DNTAG0643	5	10	468	1113	782	5954	4878
DNTAG0644	2	9	2191	1579	935	8260	3998
DNTAG0645	27	29	535	1491	1491	7051	4441
DNTAG0646	63	227	5364	5788	5637	14688	7227
DNTAG0647	205	905	4362	7712	9307	14964	8094
DNTAG0648	5	28	3368	2302	1645	10702	5485
DNTAG0649	9	37	4151	1792	2003	4783	1991
DNTAG0650	86	107	14611	6982	8833	16001	8479
DNTAG0651	11	27	5357	3453	3320	7765	4107
DNTAG0652	9	25	1420	1171	1293	2541	1583
DNTAG0653	33	50	840	1294	1518	2082	985
DNTAG0654	12	36	922	1099	856	1762	1095
DNTAG0655	38	60	9772	5643	4528	14673	8801
DNTAG0656	105	143	14636	9198	6973	17526	12816
DNTAG0657	24	23	2560	1499	1611	4818	2498
DNTAG0658	4	21	840	945	770	2120	1025
DNTAG0659	7	15	837	881	644	2070	969
DNTAG0660	37	49	849	1813	1435	1898	1156
DNTAG0661	139	135	3371	2807	2797	3730	2863
DNTAG0662	39	68	3871	2837	2475	3664	3724
DNTAG0663	90	130	10365	6638	6463	11588	6755
DNTAG0664	47	62	4709	2957	2960	6156	3942
DNTAG0665	116	74	5801	4260	4058	6877	4019
DNTAG0666	34	97	5115	1837	1951	4523	3395
DNTAG0667	2	14	1091	624	385	1221	797
DNTAG0668	33	36	3045	1747	2095	4558	2711
DNTAG0669	28	18	1326	1012	935	1310	815
DNTAG0670	88	96	2557	2585	2041	2921	2066
DNTAG0671	8	20	2612	1271	744	3377	2245
DNTAG0672	36	78	4916	3895	3058	5951	3804
DNTAG0769	128	235	17675	12566	11664	21424	15398
DNTAG0771	282	335	19057	13333	14746	25651	15378
DNTAG0772	2	10	6806	1964	1102	17012	8590
DNTAG0773	63	110	10379	6740	6110	14526	9033
DNTAG0774	46	57	12044	8265	6075	17333	8713
DNTAG0775	69	114	10436	3337	3552	6364	4383
DNTAG0776	3	8	10506	2661	1365	6567	3900
DNTAG0777	59	74	4186	3537	3147	4548	3096
DNTAG0778	554	419	19511	13319	14354	19881	12193
DNTAG0779	398	461	20314	14727	15784	26472	17297
DNTAG0780	755	622	23419	16088	17603	24564	17030
DNTAG0781	250	272	16786	8840	7298	12348	8055
DNTAG0782	157	184	26818	9134	6507	18979	11290
DNTAG0783	24	45	21470	5774	3678	17975	10034
DNTAG0784	26	77	15568	4507	3274	10205	6365
DNTAG0785	8	33	8547	2175	1579	6260	4015
DNTAG0786	35	39	7392	2320	1808	4353	3165
DNTAG0787	68	111	15537	7286	6435	15478	10955
DNTAG0788	326	409	16889	10065	10936	16030	11704
DNTAG0789	268	308	18571	10077	10325	19097	14021
DNTAG0790	105	139	16173	9926	6905	19195	10242
DNTAG0791	112	139	16732	10579	7687	17875	10542
DNTAG0792	341	346	14907	13412	9884	16238	10338
DNTAG0793	102	114	14222	9187	5981	15062	8452
DNTAG0794	276	271	17932	13907	11130	19254	10818
DNTAG0795	3	20	11607	4495	2495	15118	9318
DNTAG0796	117	185	14123	6898	5821	12319	7908
DNTAG0797	24	79	11963	5531	3892	11069	5580
DNTAG0798	206	226	15462	8290	7257	11747	9043
DNTAG0799	220	362	19444	11155	11397	19168	12404
DNTAG0800	65	110	23750	8832	7207	22132	13002
DNTAG0801	61	118	21105	8796	6164	19435	12396
DNTAG0802	3	9	3557	1132	697	6303	3666
DNTAG0803	14	27	6219	3361	2806	9038	4910
DNTAG0804	67	56	3422	2196	2809	5401	3000
DNTAG0805	6	24	2549	1502	837	3302	1871
DNTAG0806	7	15	2349	1096	593	2764	2128
DNTAG0807	0	2	1937	654	494	3351	1613
DNTAG0808	24	53	8628	4341	2446	8047	5687
DNTAG0809	10	28	3727	1331	1405	4763	4017
DNTAG0810	16	26	6013	1917	2241	9207	6634
DNTAG0811	15	42	1032	813	923	1669	1175
DNTAG0812	51	121	2802	1876	1752	3166	2335
DNTAG0813	0	0	914	167	49	1944	1345
DNTAG0814	10	9	612	441	516	1101	833
DNTAG0815	15	29	4281	1984	2392	6146	4755
DNTAG0816	286	324	11210	10153	9110	14998	9603
DNTAG0817	36	53	1862	1352	1677	2097	1341
DNTAG0818	11	11	1916	1305	688	2496	1272
DNTAG0819	87	95	2961	2762	2616	3346	2304
DNTAG0820	133	187	7535	6339	4611	7916	5056
DNTAG0821	104	124	11009	6572	5772	16079	10665
DNTAG0822	120	159	12644	9005	7625	16427	10459
DNTAG0823	137	168	2355	2584	2682	3127	2436
DNTAG0824	18	38	3035	1716	1171	3360	1989
DNTAG0825	6	6	1531	954	346	1384	1025
DNTAG0826	26	19	1211	1140	739	1320	748
DNTAG0827	35	53	2825	2342	1277	2470	1775
DNTAG0828	31	19	2292	1450	1071	2670	1660
DNTAG0829	29	45	4634	2656	1590	5267	3593
DNTAG0830	24	79	5820	4421	2704	6550	4857
DNTAG0831	68	115	6075	4732	3316	6887	3127
DNTAG0832	20	87	12357	7389	6784	17485	11285
DNTAG0833	36	50	13213	7611	7731	13414	7794
DNTAG0834	43	254	12033	8730	10307	17591	12205
DNTAG0835	13	31	445	1981	1388	7258	4536
DNTAG0836	0	3	74	161	30	1590	2540
DNTAG0837	46	80	501	2476	1497	6457	5047
DNTAG0838	0	11	792	366	126	3588	3509
DNTAG0839	212	974	5818	8588	10346	13186	8938
DNTAG0840	255	924	6640	7590	10959	13168	8212
DNTAG0841	35	40	3737	1675	2666	4231	1967
DNTAG0842	15	47	3834	1890	2437	4744	2277
DNTAG0843	46	74	11887	6548	7449	13132	6626
DNTAG0844	18	12	857	1234	936	2127	979
DNTAG0845	5	11	765	790	678	1876	955
DNTAG0846	19	30	918	1595	1127	1914	1079
DNTAG0847	1	2	2456	314	246	7106	4825
DNTAG0848	163	185	10612	8365	7234	12106	7900
DNTAG0849	152	175	13408	10468	7628	15924	11174
DNTAG0850	16	27	831	1365	904	1920	946
DNTAG0851	33	35	1235	1824	1544	2389	1217
DNTAG0852	67	63	1148	1618	1303	2065	1075
DNTAG0853	123	140	11018	6331	5641	11893	6444
DNTAG0854	83	127	13925	5253	5647	13575	10598
DNTAG0855	202	233	13458	7977	8114	14444	8711
DNTAG0856	28	30	5120	3366	2229	6535	3409
DNTAG0857	84	89	5103	4952	3171	5900	3664
DNTAG0858	7	14	4066	1713	1233	5477	3181
DNTAG0859	30	6	1514	1088	495	1339	890
DNTAG0860	8	3	1413	1105	414	1306	834
DNTAG0861	1	9	979	633	254	1142	844
DNTAG0862	14	36	3371	1895	1522	3042	2448
DNTAG0863	8	35	3159	1748	1654	3493	2475
DNTAG0864	13	25	2137	903	742	2473	1846
