# Supplementary material for: Direct screening for chromatin status on DNA barcodes in yeast delineates the regulome of H3K79 methylation by Dot1
Source: eLife. 2016 Dec 6;5:e18919. doi: 10.7554/eLife.18919 (PMC5179194; doi:10.7554/eLife.18919)
Supplement: Figure 5—source data 3. — DOI: http://dx.doi.org/10.7554/eLife.18919.027 [file elife-18919-fig5-data3.xlsx]

## Sheet: Sheet1
Figure 5 - source data 3
Belonging to Figure 5D, 5-S2
Data from H2Bub and H3K9ac ChIP-qPCR experiment
HO promoter	H2Bub/H2B			H3K9ac/H2B
WT	1.1391	0.807092	1.0538	0.890642	1.07803	1.03133
gcn5d	2.08485	1.78424	1.71789	0.405124	0.503658	0.42335
ACT promoter	H2Bub/H2B			H3K9ac/H2B
WT	1.34381	0.776514	0.879675	1.1218	1.09429	0.783901
gcn5d	1.66833	1.40061	1.17359	0.298314	0.392607	0.272225
ACT1 ORF	H2Bub/H2B			H3K9ac/H2B
WT	1.34697	0.805023	0.848011	0.932437	0.990946	1.07662
gcn5d	1.58532	1.37183	1.34445	0.422413	0.650546	0.57682
ADH1 promoter	H2Bub/H2B			H3K9ac/H2B
WT	1.27934	0.915382	0.805273	1.12375	1.10416	0.77209
gcn5d	1.31946	1.13635	1.06509	0.274316	0.36789	0.257371
ADH1 ORF	H2Bub/H2B			H3K9ac/H2B
WT	1.20302	0.889048	0.907935	0.918806	1.01977	1.06142
gcn5d	1.58309	1.27193	1.28053	0.550259	0.631004	0.53982
PMA1 promoter	H2Bub/H2B			H3K9ac/H2B
WT	1.25551	0.827289	0.917199	1.07783	1.08509	0.837078
gcn5d	1.15354	1.00685	1.04176	0.528561	0.600109	0.520761
PMA1 ORF	H2Bub/H2B			H3K9ac/H2B
WT	1.18147	0.791241	1.02729	0.890009	1.01063	1.09936
gcn5d	1.23242	1.12745	1.1222	0.937015	1.29964	1.09816
