# Supplementary material for: Direct screening for chromatin status on DNA barcodes in yeast delineates the regulome of H3K79 methylation by Dot1
Source: eLife journal article supplement (doi:10.7554/elife.18919), 2016-12-06
Supplement: supp [file elife-18919-supp-v1.zip]

|                 |               |                                | Log2(me3/me1) -- growth-corrected |         |
|-----------------|---------------|--------------------------------|-----------------------------------|---------|
| Systematic name | Standard name | (potential) demethylase domain | UpTag                             | DownTag |
| YER051W         | JHD1          | JmjC                           | -0.217                            | 0.009   |
| YER169W         | RPH1          | JmjC                           | 0.227                             | 0.255   |
| YDR096W         | GIS1          | JmjC                           | -0.241                            | -0.042  |
| YMR176W         | ECM5          | JmjC                           | 0.027                             | 0.155   |
| YJR119C         | JHD2          | JmjC                           | -0.040                            | 0.146   |
| YMR020W         | FMS1          | amine oxidase                  | -0.162                            | -0.093  |

**Figure 2 -figure supplement 2. Growth-corrected H3K79me scores of genes that contain potential demethylase domains.**

Data taken from Figure 2-source data 2.
