# Supplementary material for: Direct screening for chromatin status on DNA barcodes in yeast delineates the regulome of H3K79 methylation by Dot1
Source: eLife journal article supplement (doi:10.7554/elife.18919), 2016-12-06
Supplement: supp [file elife-18919-supp-v1.zip]

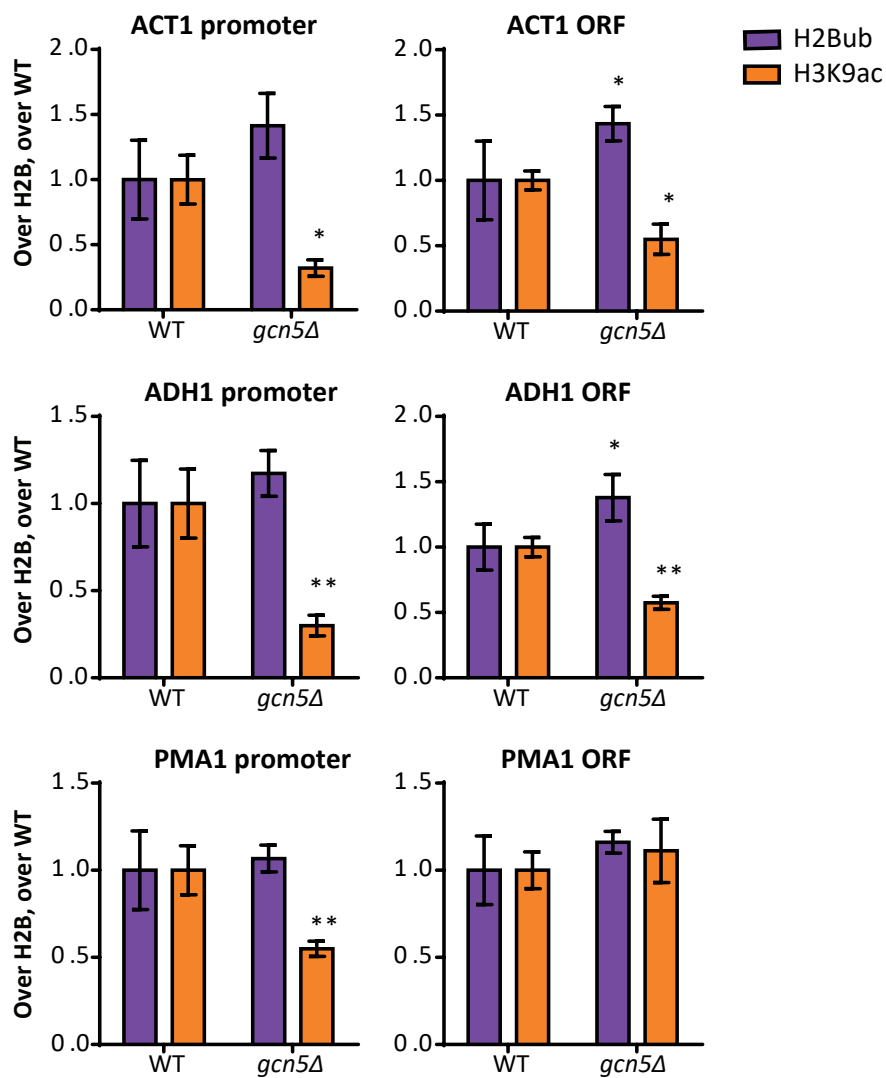

**Figure 5 -figure supplement 3. Gcn5 regulates H2Bub and H3K9ac at several loci.** ChIP-qPCR analysis of H2Bub and H3K9ac, normalized to H2B, at several loci. n=3 each, the wild-type average was set to 1.
