# Supplementary material for: Direct screening for chromatin status on DNA barcodes in yeast delineates the regulome of H3K79 methylation by Dot1
Source: eLife journal article supplement (doi:10.7554/elife.18919), 2016-12-06
Supplement: supp [file elife-18919-supp-v1.zip]

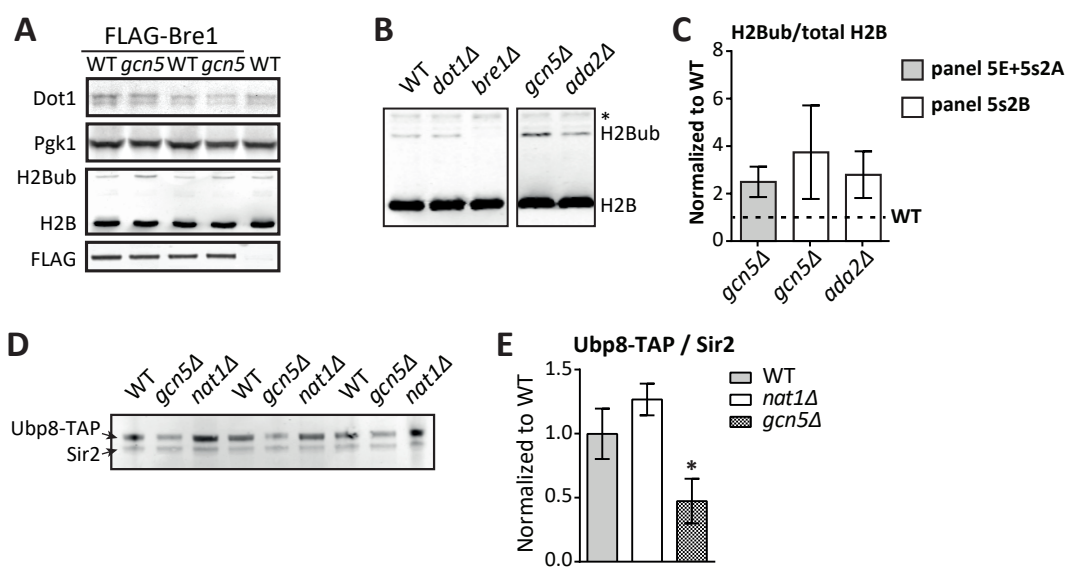

**Figure 5 -figure supplement 2. Immunoblots confirming the effect of Gcn5 on global H2Bub and Ubp8 levels.**

A) Replicates of Figure 5E. Immunoblots showing that Gcn5 does not alter Dot1 expression, and causes a global increase in H2Bub. *BRE1* harbors an N-terminal FLAG tag in these strains. B) Immunoblot showing H2B ubiquitination in the indicated strains. All strains were on the same blot, but the blot was cropped to remove irrelevant samples. The asterisk indicates an aspecific band. C) Immunoblot quantification of H2Bub/H2B levels in mutant strains, normalized to wild-type (1, indicated with a dashed line). D) Immunoblot showing the effects of *GCN5* or *NAT1* deletion on Ubp8-TAP abundance in chromatin. Sir2 was used as a loading control. E) Quantification of the blot shown in D.
