# Supplementary material for: Direct screening for chromatin status on DNA barcodes in yeast delineates the regulome of H3K79 methylation by Dot1
Source: eLife journal article supplement (doi:10.7554/elife.18919), 2016-12-06
Supplement: supp [file elife-18919-supp-v1.zip]

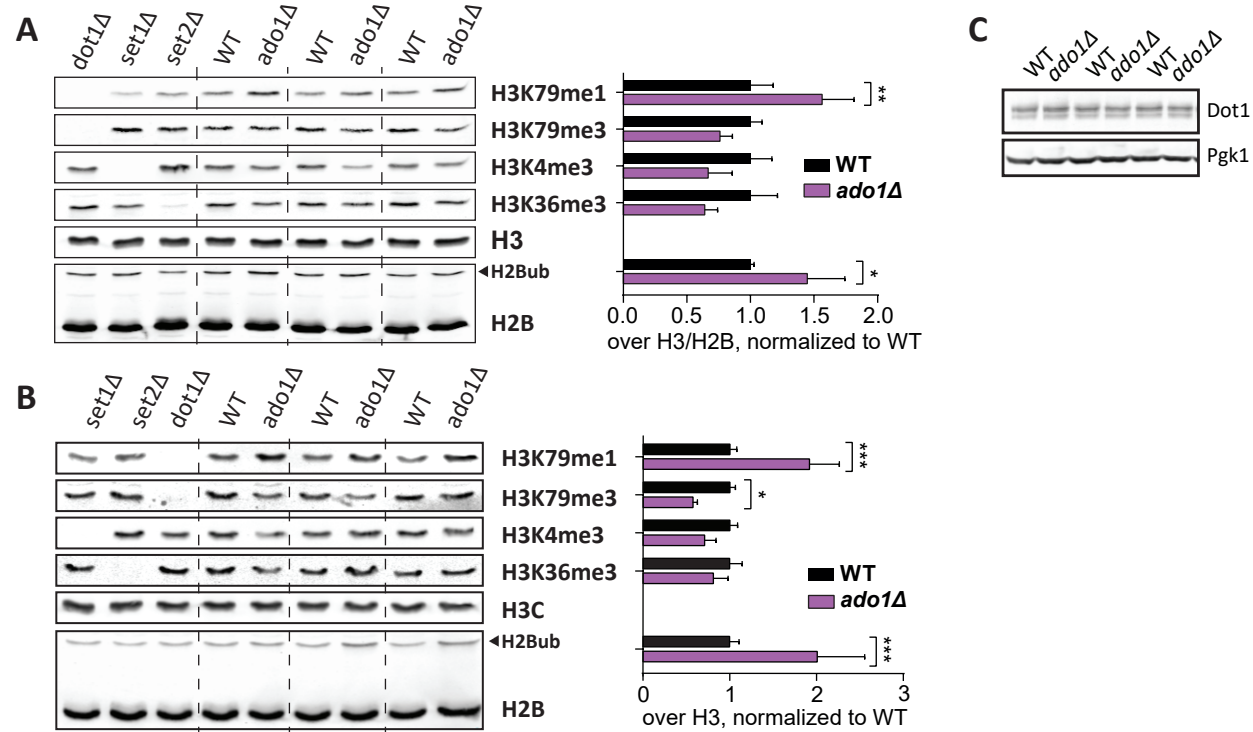

**Figure 3 -figure supplement 2. Ado1 immunoblots.**

A) Uncropped blots of Figure 3B, showing H3 methylation and H2B ubiquitination in wild-type and *ado1Δ* strains, as well as some controls. Alongside is the quantification of these blots. Replicates are independent samples of the same strains. Methylation of H3K79, H3K4 and H3K36 all decrease on average, but the decreases seem to be (partially) compensated by an increase in H2Bub, especially in the first sample. B) Immunoblots like in A, from independent samples of one wild-type and one knock-out strain, with the quantification alongside. C) Dot1 blots show that *ADO1* deletion does not alter Dot1 expression.
