# Supplementary material for: Direct screening for chromatin status on DNA barcodes in yeast delineates the regulome of H3K79 methylation by Dot1
Source: eLife journal article supplement (doi:10.7554/elife.18919), 2016-12-06
Supplement: supp [file elife-18919-supp-v1.zip]

UpTag

DownTag

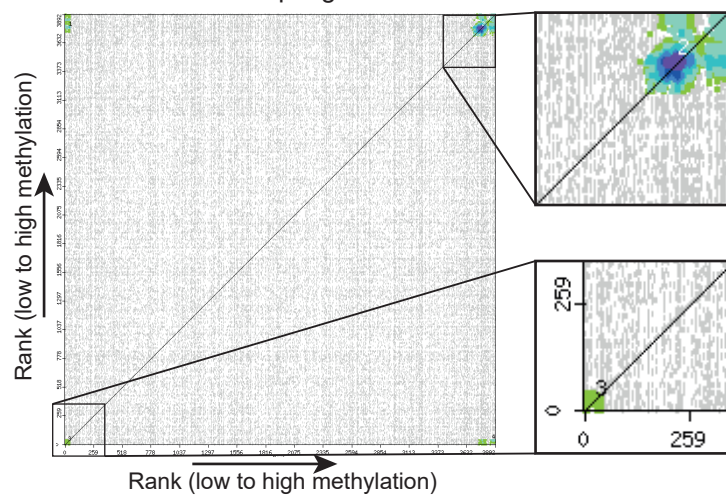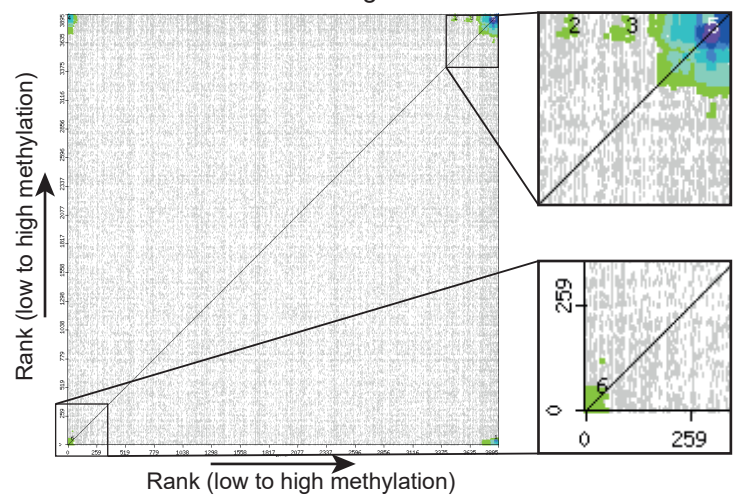**Figure 4 -figure supplement 1. CLIK plots.**

This figure is related to the data displayed in Table 1. Plots were generated by the CLIK web tool (<http://www.rothsteinlab.com/tools/clik>; Dittmar et al., 2013) using lists of ORFs ranked on growth-corrected H3K79me score as input. The main clusters shown in the magnifications were analysed for enriched complexes, and the results of this analysis can be found in Table 1 and Table 1-source data 1.
