# Supplementary material for: Direct screening for chromatin status on DNA barcodes in yeast delineates the regulome of H3K79 methylation by Dot1
Source: eLife journal article supplement (doi:10.7554/elife.18919), 2016-12-06
Supplement: supp [file elife-18919-supp-v1.zip]

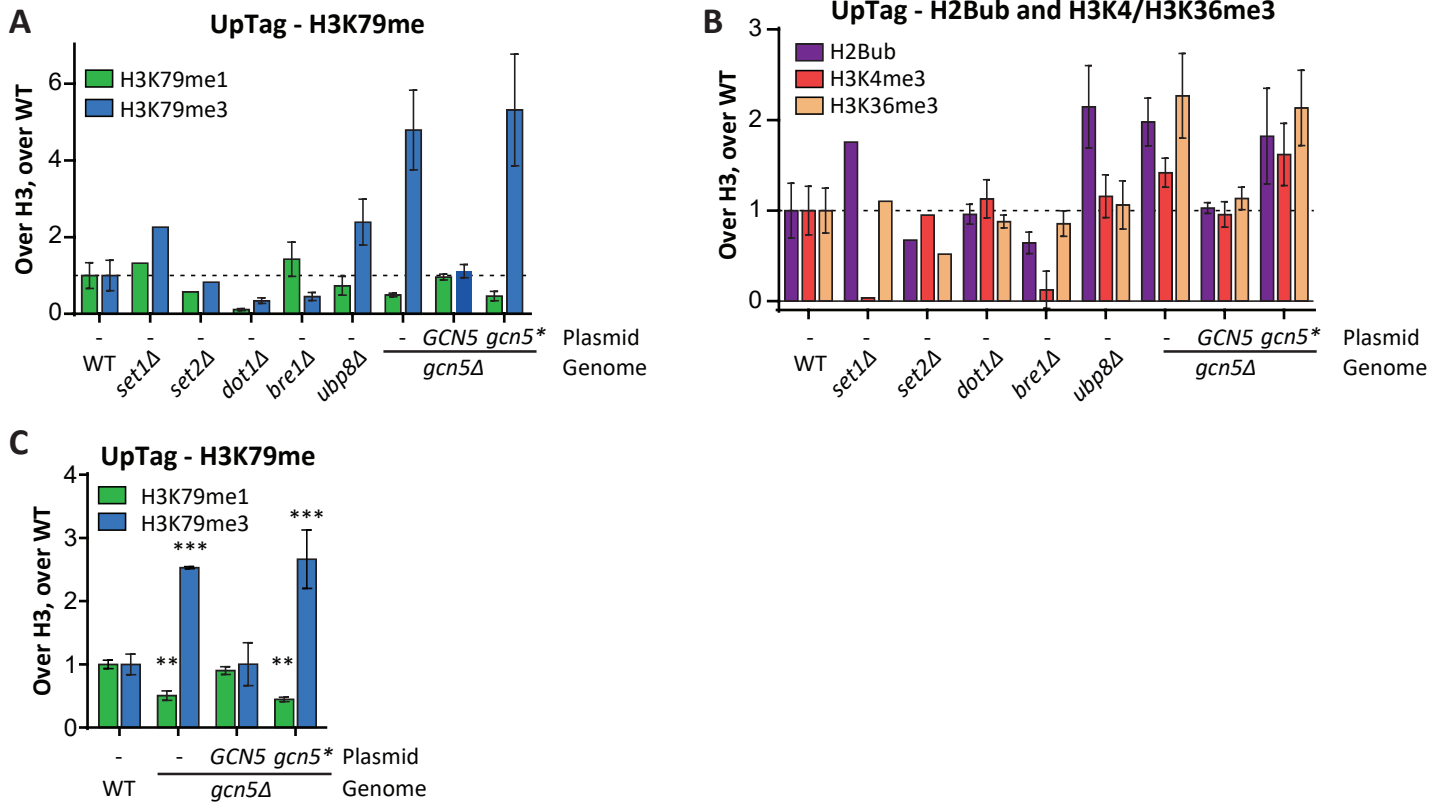

**Figure 5-figure supplement 1. Custom Epi-ID experiments with controls.**

A) Custom Epi-ID experiment shown in Figure 5B, with the control strains included in the experiment. All strains harboured a *LEU2* CEN plasmid (empty or containing *GCN5*, as indicated) and were grown up in a pool in YC-LEU. *Gcn5\** contains the F221A mutation, which abrogates catalytic activity. One replicate for *set1Δ* and *set2Δ*, three replicates for *dot1Δ*, *bre1Δ* and *ubp8Δ*, 5 or 6 replicates per *gcn5Δ* mutant and ten replicates of wild type. B) Custom Epi-ID results for H2Bub, H3K4me3 and H3K36me3, from the same experiment as shown in panel A. *Gcn5* data as shown in Figure 5C. H2Bub and H3K36me3 are expected to be low at this intergenic (promoter-like) locus, explaining why the controls for these marks show smaller decreases than for H3K4me3, which is enriched around the transcription start site. C) Independent custom Epi-ID experiment. Like in panel A, but with five wild types and three replicates per *GCN5* mutant.
