# Supplementary material for: Direct screening for chromatin status on DNA barcodes in yeast delineates the regulome of H3K79 methylation by Dot1
Source: eLife. 2016 Dec 6;5:e18919. doi: 10.7554/eLife.18919 (PMC5179194; doi:10.7554/eLife.18919)
Supplement: Supplementary file 1. — DOI: http://dx.doi.org/10.7554/eLife.18919.031 [file elife-18919-supp1.xlsx]

## Sheet: Strains
Supplemental file 1
Yeast strains used in this study
Strain name	Genotype	Reference	Figures
NatMX KO collection	MAT@ can1d::STE2pr-Sp_his5 lyp1d his3d1 leu2d0 ura3d0 met15d0 GOI::NatMX	Tong et al., 2006
Barcoders collection	MATa his3d1 leu2d0 met15d0 ura3d0 HO::barcodedKanMX	Yan et al., 2008
NatMXKO x Barcoders collection	MATa can1d::STE2pr-Sp_his5 lyp1d his3d1 leu2d0 ura3d0 met15d0 HO::barcodedKanMX GOI::NatMX	This study	1B, 2A,2B, 2-S1, 2-S2
Custom NatMXKO x Barcoders cross	MATa can1d::STE2pr-Sp_his5 lyp1d his3d1 leu2d0 ura3d0 met15d0 HO::barcodedKanMX GOI::NatMX	This study	5B, 5C, 4-S1B, 5-S1
NKI4554	MATa his3d1 leu2d0 met15d0 ura3d0 ho::KanMX+barcode(sir2)	This study
NKI4555	MATa his3d1 leu2d0 met15d0 ura3d0 ho::KanMX+barcode(sir3)	This study
NKI4556	MATa his3d1 leu2d0 met15d0 ura3d0 ho::KanMX+barcode(sir4)	This study
Y7092	MAT@ can1d::STE2pr-Sp_his5 lyp1d his3d1 leu2d0 ura3d0 met15d0 LYS2+	Tong et al., 2006
NKI4553	MAT@ can1d::STE2pr-Sp_his5 lyp1d his3d1 leu2d0 ura3d0 met15d0 LYS2+ dot1::CloNat-GPDp-Dot1	This study
NKI2455	MAT@ can1d::STE2pr-Sp_his5 lyp1d his3d1 leu2d0 ura3d0 met15d0 LYS2+ mms21:mms21dC-CYC1term-NatMX	This study
NKI4557	MATa can1d::STE2pr-Sp_his5 lyp1d his3d1 leu2d0 ura3d0 met15d0 ho::barcode(sir2)KanMX dot1::NatMX	This study	1B, 3A, 3-S1A, 3-S1D, 3-S2A, 3-S2B, 4-S1C, 5-S2B
NKI4558	MATa can1d::STE2pr-Sp_his5 lyp1d his3d1 leu2d0 ura3d0 met15d0 ho::barcode(sir3)KanMX bre1::NatMX	This study	1B, 2A, 2B, 3A, 3-S1A, 3-S1C, 3-S1D, 4-S1C, 5-S2B
NKI4559	MATa can1d::STE2pr-Sp_his5 lyp1d his3d1 leu2d0 ura3d0 met15d0 ho::barcode(sir4)KanMX dot1::NatMX-GPDp-Dot1	This study	1B, 2A, 2B
NKI4560	MATa can1d::STE2pr-Sp_his5 lyp1d his3d1 leu2d0 ura3d0 met15d0 ho::barcode(0001)KanMX	This study	3A, 3D, 5D, 1-S1B, 3-S1A, 3-S1C, 3-S1D, 3-S2A, 3-S2B, 4-S1C, 5-S2B, 5-S3
NKI4734	MATa can1d::STE2pr-Sp_his5 lyp1d his3d1 leu2d0 ura3d0 met15d0 ho::barcode(0323)KanMX nat1::NatMX	From NatMXKO x Barcoders collection	3A, 3-S1A, 3-S1D
NKI4735	MATa can1d::STE2pr-Sp_his5 lyp1d his3d1 leu2d0 ura3d0 met15d0 ho::barcode(0322)KanMX ard1::NatMX	From NatMXKO x Barcoders collection	3A, 3-S1A, 3-S1D
NKI4641	MATa can1d::STE2pr-Sp_his5 lyp1d his3d1 leu2d0 ura3d0 met15d0 ho::barcode(0557)KanMX slx5::NatMX	From NatMXKO x Barcoders collection	4-S1C
NKI4642	MATa can1d::STE2pr-Sp_his5 lyp1d his3d1 leu2d0 ura3d0 met15d0 ho::barcode(0170)KanMX slx8::NatMX	From NatMXKO x Barcoders collection	4-S1C
NKI4645	MATa can1d::STE2pr-Sp_his5 lyp1d his3d1 leu2d0 ura3d0 met15d0 ho::barcode(0001)KanMX gcn5::NatMX	From NatMXKO x Barcoders collection	5-S2B
NKI4756	MATa can1d::STE2pr-Sp_his5 lyp1d his3d1 leu2d0 ura3d0 met15d0 ho::barcode(0278)KanMX gcn5::NatMX	This study	5D, 5-S3
NKI4646	MATa can1d::STE2pr-Sp_his5 lyp1d his3d1 leu2d0 ura3d0 met15d0 ho::barcode(0812)KanMX ada2::NatMX	From NatMXKO x Barcoders collection	5-S2B
NKI4648	MATa can1d::STE2pr-Sp_his5 lyp1d his3d1 leu2d0 ura3d0 met15d0 ho::barcode(0186)KanMX ado1::NatMX	From NatMXKO x Barcoders collection	3D, 3-S2A, 3-S2B
NKI4650	MATa can1d::STE2pr-Sp_his5 lyp1d his3d1 leu2d0 ura3d0 met15d0 ho::barcode(0530)KanMX set2::NatMX	From NatMXKO x Barcoders collection	3-S1C, 3-S2A, 3-S2B
NKI4651	MATa can1d::STE2pr-Sp_his5 lyp1d his3d1 leu2d0 ura3d0 met15d0 ho::barcode(0131)KanMX set1::NatMX	From NatMXKO x Barcoders collection	3-S2A, 3-S2B
NKI4656	MATa can1d::STE2pr-Sp_his5 lyp1d his3d1 leu2d0 ura3d0 met15d0 ho::barcode(0957)KanMX ubp8::NatMX	From NatMXKO x Barcoders collection	3-S1C
BY4702	MAT@ leu2d0 lys2d0 met15d0	Brachmann et al., 1998	5A
NKI1107	MAT@ leu2d0 lys2d0 met15d0 gcn5::kanMX	Stulemeijer et al., 2011	5A
BY4733	MATa his3d200 leu2d0 met15d0 trp1d63 ura3d0	Brachmann et al., 1998
NKI4657	MATa his3d200 leu2d0 met15d0 trp1d63 ura3d0 HO::KanMX+barcodes(sir4)	This study	2C, 3B, 3D, 3-S2A, 4-S1A
NKI4712	MATa his3d200 leu2d0 met15d0 trp1d63 ura3d0 HO::KanMX+barcodes(sir4) ado1::NatMX	This study	3B, 3D,3-S2A
NKI4699	MATa his3d200 leu2d0 met15d0 trp1d63 ura3d0 HO::KanMX+barcodes(sir4) rtt109::NatMX	This study	2C
NKI4663	MATa his3d200 leu2d0 met15d0 trp1d63 ura3d0 HO::KanMX+barcodes(sir4) slx5::NatMX	This study	4-S1A
NKI4664	MATa his3d200 leu2d0 met15d0 trp1d63 ura3d0 HO::KanMX+barcodes(sir4) slx8::NatMX	This study	4-S1A
NKI4710	MATa his3d200 leu2d0 met15d0 trp1d63 ura3d0 HO::KanMX+barcodes(sir4) mms21:mms21dsl-CYC1term-NatMX	This study
NKI1142	MATa his3d200 leu2d0 met15d0 trp1d63 ura3d0 HO::KanMX+barcodes(sir4) 2u-cir°	This study	4B, 4C, 4-S1A
NKI1143	MATa his3d200 leu2d0 met15d0 trp1d63 ura3d0 HO::KanMX+barcodes(sir4) 2u-cir° slx5::NatMX	This study	4C, 4-S1A
NKI1144	MATa his3d200 leu2d0 met15d0 trp1d63 ura3d0 HO::KanMX+barcodes(sir4) 2u-cir° slx8::NatMX	This study	4B, 4C, 4-S1A
NKI4711	MATa his3d200 leu2d0 met15d0 trp1d63 ura3d0 HO::KanMX+barcodes(sir4) 2u-cir° mms21:mms21dC-CYC1term-NatMX	This study	4B, 4C
NKI4602	MATa lys2d0 trp1d63 his3d200 ura3d0 leu2d0 met15d0 hta1-htb1::MET15 hta2-htb2::LEU2 pCS1(pCEN-LYS2-HTA1-HTB1)	Vlaming et al., 2014
NKI4609	MATa lys2d0 trp1d63 his3d200 ura3d0 leu2d0 met15d0 hta1-htb1::MET15 hta2-htb2::LEU2 pRG422 (pCEN-HIS3-HTA1-FLAG-HTB1)	This study	3-S1C
NKI4610	MATa lys2d0 trp1d63 his3d200 ura3d0 leu2d0 met15d0 hta1-htb1::MET15 hta2-htb2::LEU2 pRG423 (pCEN-HIS3-HTA1-FLAG-HTB1(K123R))	This study	3-S1C
NKI4746	MAT@ can1d::HphMX lyp1d::STE3pr-LEU2 his3d1 leu2d0 ura3d0 met15d0 HO::BC-KanMX-BC lge1::LGE1-TAP-HIS3MX6	This study	5F, 3-S1F
NKI4747	MAT@ can1d::HphMX lyp1d::STE3pr-LEU2 his3d1 leu2d0 ura3d0 met15d0 HO::BC-KanMX-BC rtf1::RTF1-TAP-HIS3MX6	This study	5F, 3-S1F
NKI4748	MAT@ can1d::HphMX lyp1d::STE3pr-LEU2 his3d1 leu2d0 ura3d0 met15d0 HO::BC-KanMX-BC ubp8::UBP8-TAP-HIS3MX6	This study	5F, 3-S1F, 5-S2D
NKI4749	MAT@ can1d::HphMX lyp1d::STE3pr-LEU2 his3d1 leu2d0 ura3d0 met15d0 HO::BC-KanMX-BC ubp10::UBP10-TAP-HIS3MX6	This study	5F, 3-S1F
NKI2537	MAT@ can1d::HphMX lyp1d::STE3pr-LEU2 his3d1 leu2d0 ura3d0 met15d0 HO::BC-KanMX-BC lge1::LGE1-TAP-HIS3MX6 nat1::NatMX	This study	3-S1F
NKI2529	MAT@ can1d::HphMX lyp1d::STE3pr-LEU2 his3d1 leu2d0 ura3d0 met15d0 HO::BC-KanMX-BC rtf1::RTF1-TAP-HIS3MX6 nat1::NatMX	This study	3-S1F
NKI2530	MAT@ can1d::HphMX lyp1d::STE3pr-LEU2 his3d1 leu2d0 ura3d0 met15d0 HO::BC-KanMX-BC ubp8::UBP8-TAP-HIS3MX6 nat1::NatMX	This study	3-S1F, 5-S2D
NKI2531	MAT@ can1d::HphMX lyp1d::STE3pr-LEU2 his3d1 leu2d0 ura3d0 met15d0 HO::BC-KanMX-BC ubp10::UBP10-TAP-HIS3MX6 nat1::NatMX	This study	3-S1F
NKI4751	MAT@ can1d::HphMX lyp1d::STE3pr-LEU2 his3d1 leu2d0 ura3d0 met15d0 HO::BC-KanMX-BC lge1::LGE1-TAP-HIS3MX6 gcn5::NatMX	This study	5F
NKI4752	MAT@ can1d::HphMX lyp1d::STE3pr-LEU2 his3d1 leu2d0 ura3d0 met15d0 HO::BC-KanMX-BC rtf1::RTF1-TAP-HIS3MX6 gcn5::NatMX	This study	5F
NKI4753	MAT@ can1d::HphMX lyp1d::STE3pr-LEU2 his3d1 leu2d0 ura3d0 met15d0 HO::BC-KanMX-BC ubp8::UBP8-TAP-HIS3MX6 gcn5::NatMX	This study	5F, 5-S2D
NKI4750	MAT@ can1d::HphMX lyp1d::STE3pr-LEU2 his3d1 leu2d0 ura3d0 met15d0 HO::BC-KanMX-BC ubp10::UBP10-TAP-HIS3MX6 gcn5::NatMX	This study	5F
BY4741	MATa his3d1 leu2d0 met15d0 ura3d0	Brachmann et al., 1998
NKI2533	MATa his3d1 leu2d0 met15d0 ura3d0 nat1::NatMX	This study
NKI4757	MATa his3d1 leu2d0 met15d0 ura3d0 gcn5::NatMX	This study
NKI2538	MATa his3d1 leu2d0 met15d0 ura3d0 rad6::RAD6-TAP-KanMX	This study	5F, 3-S1F
NKI2540	MATa his3d1 leu2d0 met15d0 ura3d0 nat1::NatMX rad6::RAD6-TAP-KanMX	This study	3-S1F
NKI2539	MATa his3d1 leu2d0 met15d0 ura3d0 gcn5::NatMX rad6::RAD6-TAP-KanMX	This study	5F
KY2513	MAT@ his3d200 lys2d128 leu2d1 ura3d52 FLAG-BRE1	Arndt lab	5E, 3-S1E, 5-S2A
NKI2532	MAT@ his3d200 lys2d128 leu2d1 ura3d52 FLAG-BRE1 nat1::NatMX	This study	3-S1E
NKI4755	MAT@ his3d200 lys2d128 leu2d1 ura3d52 FLAG-BRE1 gcn5::NatMX	This study	5E, 5-S2A
References
Brachmann CB, Davies A, Cost GJ, Caputo E, Li J, Hieter P, et al. 1998. Designer deletion strains derived from Saccharomyces cerevisiae S288C: a useful set of strains and plasmids for PCR-mediated gene disruption and other applications. Yeast (Chichester, England) 14:115–32. doi:10.1002/(SICI)1097-0061(19980130)14:2<115::AID-YEA204>3.0.CO;2-2.
Ghaemmaghami S, Huh W-K, Bower K, Howson RW, Belle A, Dephoure N, et al. 2003. Global analysis of protein expression in yeast. Nature 425:737–741. doi:10.1038/nature02046.
Stulemeijer IJ, Pike BL, Faber AW, Verzijlbergen KF, van Welsem T, Frederiks F, et al. 2011. Dot1 binding induces chromatin rearrangements by histone methylation-dependent and -independent mechanisms. Epigenetics & chromatin 4:2. doi:10.1186/1756-8935-4-2.
Tong AHY, Boone C. 2006. Synthetic Genetic Array Analysis in Saccharomyces cerevisiae. In Yeast Protocols, Vol. 313 of, pp. 171–192, Humana Press, New Jersey.
Vlaming H, van Welsem T, de Graaf EL, Ontoso D, Altelaar AM, San-Segundo PA, et al. 2014. Flexibility in crosstalk between H2B ubiquitination and H3 methylation in vivo. EMBO reports 15:1077–1084. doi:10.15252/embr.201438793.
Yan Z, Costanzo M, Heisler LE, Paw J, Kaper F, Andrews BJ, et al. 2008. Yeast Barcoders: a chemogenomic application of a universal donor-strain collection carrying barcode identifiers. Nature methods 5:719–25. doi:10.1038/nmeth.1231.
