# Supplementary material for: Direct screening for chromatin status on DNA barcodes in yeast delineates the regulome of H3K79 methylation by Dot1
Source: eLife. 2016 Dec 6;5:e18919. doi: 10.7554/eLife.18919 (PMC5179194; doi:10.7554/eLife.18919)
Supplement: Supplementary file 2. — DOI: http://dx.doi.org/10.7554/eLife.18919.032 [file elife-18919-supp2.xlsx]

## Sheet: Sheet1
Supplemental file 2
Plasmids used in this study
Name	Description	Reference
pYM-N15	NatMX TDH3-promoter	Janke et al., 2004
pBIS-GALkFLP(URA3)	CEN URA3 GAL10pr-flp(H305L)	Tsalik et al., 1998
pRS315	CEN LEU2	Sikorski et al., 1998
pRS414-GCN5	CEN TRP1 GCN5	vanOevelen et al., 2006
pTW142	CEN LEU2 GCN5	This study
pRS414-gcn5-F221A	CEN TRP1 gcn5-F221A	vanOevelen et al., 2006
pTW143	CEN LEU2 gcn5-F221A	This study
pFvL113	CEN GALp-CRE-EBD-CYC1term NatMX	Lindstrom et al., 2009
pFvL29	pFA6a-TAP-KanMX6	Frederiks et al., 2010
pRG422	CEN HIS3 HTA1 FLAG-HTB1	Gardner et al., 2005
pRG423	CEN HIS3 HTA1 FLAG-HTB1-K123R	Gardner lab
References
Janke C, Magiera MM, Rathfelder N, Taxis C, Reber S, Maekawa H, et al. 2004. A versatile toolbox for PCR-based tagging of yeast genes: new fluorescent proteins, more markers and promoter substitution cassettes. Yeast 21:947–962. doi:10.1002/yea.1142.
Tsalik EL, Gartenberg MR. 1998. Curing Saccharomyces cerevisiae of the 2 micron plasmid by targeted DNA damage. Yeast 14:847–52. doi:10.1002/(SICI)1097-0061(19980630)14:9<847::AID-YEA285>3.0.CO;2-9.
Sikorski RS, Hieter P. 1989. A system of shuttle vectors and yeast host strains designed for efficient manipulation of DNA in Saccharomyces cerevisiae. Genetics 122: 19–27.
Van Oevelen CJC, Van Teeffelen HAAM, Van Werven FJ, Timmers HTM. 2006. Snf1p-dependent Spt-Ada-Gcn5-acetyltransferase (SAGA) recruitment and chromatin remodeling activities on the HXT2 and HXT4 promoters. The Journal of biological chemistry 281:4523–31. doi:10.1074/jbc.M509330200.
Lindstrom DL, Gottschling DE. 2009. The mother enrichment program: a genetic system for facile replicative life span analysis in Saccharomyces cerevisiae. Genetics 183:413–22, 1SI–13SI. doi:10.1534/genetics.109.106229.
Frederiks F, van Welsem T, Oudgenoeg G, Heck AJR, Janzen CJ, van Leeuwen F. 2010. Heterologous expression reveals distinct enzymatic activities of two DOT1 histone methyltransferases of Trypanosoma brucei. Journal of cell science 123:4019–23. doi:10.1242/jcs.073882.
Gardner RG, Nelson ZW, Gottschling DE. 2005. Ubp10/Dot4p regulates the persistence of ubiquitinated histone H2B: distinct roles in telomeric silencing and general chromatin. Molecular and cellular biology 25:6123–39. doi:10.1128/MCB.25.14.6123-6139.2005.
