# Supplementary material for: Direct screening for chromatin status on DNA barcodes in yeast delineates the regulome of H3K79 methylation by Dot1
Source: eLife. 2016 Dec 6;5:e18919. doi: 10.7554/eLife.18919 (PMC5179194; doi:10.7554/eLife.18919)
Supplement: Supplementary file 3. — DOI: http://dx.doi.org/10.7554/eLife.18919.033 [file elife-18919-supp3.xlsx]

## Sheet: Sheet1
Supplemental file 3
Primers used in this study
Oligo name	Sequence	Description
2_UP_Fw	AATGATACGGCGACCACCGAGATCTCGCTCTTCCGATCTAGATGTCCACGAGGTCTCT	P5-Seq/U1. SR flow cell only.
2_DN_Fw	AATGATACGGCGACCACCGAGATCTACACTCTTCCGATCTACGGTGTCGGTCTCGTAG	P5-Seq/D1. SR flow cell only.
2_UP_Rv_allindices	CAAGCAGAAGACGGCATACGANNNNNNGTCGACCTGCAGCGTACG	Separate primers below. P7-ind-U2. SR flow cell only.
2_DN_Rv_allindices	CAAGCAGAAGACGGCATACGANNNNNNAACGAGCTCGAATTCATCGA	Separate primers below. P7-ind-D2. SR flow cell only.
2_UP_Seq	CGCTCTTCCGATCTAGATGTCCACGAGGTCTCT	Custom seq primer, ends with U1. SR flow cell only.
2_DN_Seq	ACACTCTTCCGATCTACGGTGTCGGTCTCGTAG	Custom seq primer, ends with D1. SR flow cell only.
2B_UP_Fw	AATGATACGGCGACCACCGAGATCTACACCTTCCGATCTAGATGTCCACGAGGTCTCT	P5-Seq/U1. Compatible with PE flow cell.
2B_DN_Fw	AATGATACGGCGACCACCGAGATCTACACTCTTCCGATCTACGGTGTCGGTCTCGTAG	P5-Seq/D1. SR&PE flow cell-compatible.
2B_UP_Rv_allindices	CAAGCAGAAGACGGCATACGAGATNNNNNNGTCGACCTGCAGCGTACG	Separate primers below. P7-ind-U2. SR&PE flow cell-compatible.
2B_DN_Rv_allindices	CAAGCAGAAGACGGCATACGAGATNNNNNNAACGAGCTCGAATTCATCGA	Separate primers below. P7-ind-D2. SR&PE flow cell-compatible.
2B_UP_Seq	ACACCTTCCGATCTAGATGTCCACGAGGTCTCT	Custom seq primer, ends with U1. SR&PE flow cell-compatible.
2B_DN_Seq	ACACTCTTCCGATCTACGGTGTCGGTCTCGTAG	Custom seq primer, ends with D1. SR&PE flow cell-compatible.
HOPromQ-2fw	GGGCGTTATTAGGTGTGAAACC	qPCR. HO promoter, near UpTag
HOpromQ-2rev	CTTTTTTCCGCGACTTTATTCG
HOtermQfw	GAGTAGAAATACGCCATCTCAAGATACA	qPCR. HO terminator, near DownTag
HOtermQrev	GGAAAGTTGATCAAGACCCAATAATAA
HML1up_Qfor	TTGGCTCCGGTGTAAAACAAA	qPCR. HML.
HML1up_Qrev	CCGCGTGCCATTCTTCAG
ADH2 PRO ii fwd	AACACCGGGCATCTCCAAC	qPCR. ADH2 promoter.
ADH2 PRO ii rev	AAGTCGCTACTGGCACTC
ACT1_Qfor	CTCTTTTTATCTTCCTTTTTTTCCTCTCT	qPCR. ACT1 promoter.
ACT1_Qrev	CGTGAAAAATCTAAAAGCTGATGTAGTAG
ADE2_ORF_Qfor	TTGGGTTTTCCATTCGTCTTG	qPCR. ADE2 ORF.
ADE2_ORF_Qrev	CAACGAAGTTACCTCTTCCATCGT
SPA2_High_Qfor	ATCAAGAGAAGAGGGTTCGACAAG	qPCR. SPA2 ORF.
SPA2_High_Qrev	CATCGGCTGCGGTAATGG
ACT1_QforORF	TCGTTCCAATTTACGCTGGTT	qPCR. ACT1 ORF.
ACT1_QrevORF	CGGCCAAATCGATTCTCAA
ADH1 PRO ii fwd	CCGTTGTTGTCTCACCATATCC	qPCR ADH1 promoter.
ADH1 PRO ii rev	GTTTCGTGTGCTTCGAGATACC
ADH1 ORF II fwd	TAGGTTCTTTGGCTGTTCAATACG	qPCR ADH1 ORF.
ADH1 ORF II rev	CGGAAACGGAAACGTTGATGACACCG
PMA1_PRO_Qfor1	TGGTGGGTACCGCTTATGCT	qPCR PMA1 promoter.
PMA1_PRO_Qrev1	TGTTAGACGATAATGATAGGACATTTGA
PMA1_ORF_Qfor1	AAATCTTGGGTGTTATGCCATGT	qPCR PMA1 ORF.
PMA1_ORF_Qrev1	CCAAGTGTCTAGCTTCGCTAACAG
2micronF2	CTCCACTTCCCGCGTTTACT	Also present on 2µ expression plasmids
2micronR2	ACCGCTTCCACAAACATTGC
2micronF3	AGTGCAGGATCAGGCCAATC	Not on 2µ expression plasmids
2micronR3	ACAGCGCTGATATACAATGAC
YRF1-1	GACTTGGTACATTGTCCCTC	5' part of Y' element
YRF1-2	GACAACGTTCCAGGACAC
VIR3500-3	AACGTGGCTTACGTAACAGC	3500 bp from TEL VIR
VIR3500-4	GCTGATTCTTTTGCTCAAGG
MMS21dsl-1	AGACGATCTACAAATAGAAGGTGGTAAAATTGAATTGACTTGACGAGTCATGTAATTAGTTATGTC	To truncate MMS21
MMS21dsl-2	CCGAAGGGCTCGGATAAGAGAAACAATAATTTTGTTTTCAGATTGTACTGAGAGTGCACC
All different Epi-ID reverse primers
Oligo name	Sequence	Index in read
2_UP_Rv_ind01	CAAGCAGAAGACGGCATACGACGTGATGTCGACCTGCAGCGTACG	ATCACG
2_UP_Rv_ind02	CAAGCAGAAGACGGCATACGAACATCGGTCGACCTGCAGCGTACG	CGATGT
2_UP_Rv_ind03	CAAGCAGAAGACGGCATACGAGCCTAAGTCGACCTGCAGCGTACG	TTAGGC
2_UP_Rv_ind04	CAAGCAGAAGACGGCATACGATGGTCAGTCGACCTGCAGCGTACG	TGACCA
2_UP_Rv_ind05	CAAGCAGAAGACGGCATACGACACTGTGTCGACCTGCAGCGTACG	ACAGTG
2_UP_Rv_ind06	CAAGCAGAAGACGGCATACGAATTGGCGTCGACCTGCAGCGTACG	GCCAAT
2_UP_Rv_ind07	CAAGCAGAAGACGGCATACGAGATCTGGTCGACCTGCAGCGTACG	CAGATC
2_UP_Rv_ind08	CAAGCAGAAGACGGCATACGATCAAGTGTCGACCTGCAGCGTACG	ACTTGA
2_UP_Rv_ind09	CAAGCAGAAGACGGCATACGACTGATCGTCGACCTGCAGCGTACG	GATCAG
2_UP_Rv_ind10	CAAGCAGAAGACGGCATACGAAAGCTAGTCGACCTGCAGCGTACG	TAGCTT
2_UP_Rv_ind11	CAAGCAGAAGACGGCATACGAGTAGCCGTCGACCTGCAGCGTACG	GGCTAC
2_UP_Rv_ind12	CAAGCAGAAGACGGCATACGATACAAGGTCGACCTGCAGCGTACG	CTTGTA
2_UP_Rv_ind13	CAAGCAGAAGACGGCATACGATTGACTGTCGACCTGCAGCGTACG	AGTCAA
2_UP_Rv_ind14	CAAGCAGAAGACGGCATACGAGGAACTGTCGACCTGCAGCGTACG	AGTTCC
2_UP_Rv_ind15	CAAGCAGAAGACGGCATACGATGACATGTCGACCTGCAGCGTACG	ATGTCA
2_UP_Rv_ind16	CAAGCAGAAGACGGCATACGAGGACGGGTCGACCTGCAGCGTACG	CCGTCC
2_UP_Rv_ind17	CAAGCAGAAGACGGCATACGACTCTACGTCGACCTGCAGCGTACG	GTAGAG
2_UP_Rv_ind18	CAAGCAGAAGACGGCATACGAGCGGACGTCGACCTGCAGCGTACG	GTCCGC
2_UP_Rv_ind19	CAAGCAGAAGACGGCATACGATTTCACGTCGACCTGCAGCGTACG	GTGAAA
2_UP_Rv_ind20	CAAGCAGAAGACGGCATACGAGGCCACGTCGACCTGCAGCGTACG	GTGGCC
2_UP_Rv_ind21	CAAGCAGAAGACGGCATACGACGAAACGTCGACCTGCAGCGTACG	GTTTCG
2_UP_Rv_ind22	CAAGCAGAAGACGGCATACGACGTACGGTCGACCTGCAGCGTACG	CGTACG
2_UP_Rv_ind23	CAAGCAGAAGACGGCATACGACCACTCGTCGACCTGCAGCGTACG	GAGTGG
2_UP_Rv_ind24	CAAGCAGAAGACGGCATACGAGCTACCGTCGACCTGCAGCGTACG	GGTAGC
2_UP_Rv_ind25	CAAGCAGAAGACGGCATACGAATCAGTGTCGACCTGCAGCGTACG	ACTGAT
2_UP_Rv_ind26	CAAGCAGAAGACGGCATACGAGCTCATGTCGACCTGCAGCGTACG	ATGAGC
2_UP_Rv_ind27	CAAGCAGAAGACGGCATACGAAGGAATGTCGACCTGCAGCGTACG	ATTCCT
2_UP_Rv_ind28	CAAGCAGAAGACGGCATACGACTTTTGGTCGACCTGCAGCGTACG	CAAAAG
2_UP_Rv_ind29	CAAGCAGAAGACGGCATACGATAGTTGGTCGACCTGCAGCGTACG	CAACTA
2_UP_Rv_ind30	CAAGCAGAAGACGGCATACGACCGGTGGTCGACCTGCAGCGTACG	CACCGG
2_UP_Rv_ind31	CAAGCAGAAGACGGCATACGAATCGTGGTCGACCTGCAGCGTACG	CACGAT
2_UP_Rv_ind32	CAAGCAGAAGACGGCATACGATGAGTGGTCGACCTGCAGCGTACG	CACTCA
2_UP_Rv_ind33	CAAGCAGAAGACGGCATACGACGCCTGGTCGACCTGCAGCGTACG	CAGGCG
2_UP_Rv_ind34	CAAGCAGAAGACGGCATACGAGCCATGGTCGACCTGCAGCGTACG	CATGGC
2_UP_Rv_ind35	CAAGCAGAAGACGGCATACGAAAAATGGTCGACCTGCAGCGTACG	CATTTT
2_UP_Rv_ind36	CAAGCAGAAGACGGCATACGATGTTGGGTCGACCTGCAGCGTACG	CCAACA
2_UP_Rv_ind37	CAAGCAGAAGACGGCATACGAATTCCGGTCGACCTGCAGCGTACG	CGGAAT
2_UP_Rv_ind38	CAAGCAGAAGACGGCATACGAAGCTAGGTCGACCTGCAGCGTACG	CTAGCT
2_UP_Rv_ind39	CAAGCAGAAGACGGCATACGAGTATAGGTCGACCTGCAGCGTACG	CTATAC
2_UP_Rv_ind40	CAAGCAGAAGACGGCATACGATCTGAGGTCGACCTGCAGCGTACG	CTCAGA
2_UP_Rv_ind41	CAAGCAGAAGACGGCATACGAACAATTGTCGACCTGCAGCGTACG	AATTGT
2_UP_Rv_ind42	CAAGCAGAAGACGGCATACGAGCTCCAGTCGACCTGCAGCGTACG	TGGAGC
2_UP_Rv_ind43	CAAGCAGAAGACGGCATACGATCTCCCGTCGACCTGCAGCGTACG	GGGAGA
2_UP_Rv_ind44	CAAGCAGAAGACGGCATACGAAGTCTCGTCGACCTGCAGCGTACG	GAGACT
2_UP_Rv_ind45	CAAGCAGAAGACGGCATACGAGGTTCTGTCGACCTGCAGCGTACG	AGAACC
2_UP_Rv_ind46	CAAGCAGAAGACGGCATACGAACGCCAGTCGACCTGCAGCGTACG	TGGCGT
2_UP_Rv_ind47	CAAGCAGAAGACGGCATACGACAAATAGTCGACCTGCAGCGTACG	TATTTG
2_UP_Rv_ind48	CAAGCAGAAGACGGCATACGACGATAGGTCGACCTGCAGCGTACG	CTATCG
2_UP_Rv_ind49	CAAGCAGAAGACGGCATACGAGTAAGCGTCGACCTGCAGCGTACG	GCTTAC
2_UP_Rv_ind50	CAAGCAGAAGACGGCATACGACTGCCGGTCGACCTGCAGCGTACG	CGGCAG
2_UP_Rv_ind51	CAAGCAGAAGACGGCATACGACAGCAAGTCGACCTGCAGCGTACG	TTGCTG
2_UP_Rv_ind52	CAAGCAGAAGACGGCATACGAGCACTTGTCGACCTGCAGCGTACG	AAGTGC
2_UP_Rv_ind53	CAAGCAGAAGACGGCATACGATGGTATGTCGACCTGCAGCGTACG	ATACCA
2_UP_Rv_ind54	CAAGCAGAAGACGGCATACGAAGAGCAGTCGACCTGCAGCGTACG	TGCTCT
2_UP_Rv_ind55	CAAGCAGAAGACGGCATACGATTTCTAGTCGACCTGCAGCGTACG	TAGAAA
2_UP_Rv_ind56	CAAGCAGAAGACGGCATACGACGATCTGTCGACCTGCAGCGTACG	AGATCG
2_UP_Rv_ind59	CAAGCAGAAGACGGCATACGATGCCGAGTCGACCTGCAGCGTACG	TCGGCA
2_UP_Rv_ind60	CAAGCAGAAGACGGCATACGACTTCGAGTCGACCTGCAGCGTACG	TCGAAG
2_UP_Rv_ind61	CAAGCAGAAGACGGCATACGATCGGGAGTCGACCTGCAGCGTACG	TCCCGA
2_UP_Rv_ind62	CAAGCAGAAGACGGCATACGAGAATGAGTCGACCTGCAGCGTACG	TCATTC
2_UP_Rv_ind63	CAAGCAGAAGACGGCATACGAATTATAGTCGACCTGCAGCGTACG	TATAAT
2_UP_Rv_ind65	CAAGCAGAAGACGGCATACGATGATTAGTCGACCTGCAGCGTACG	TAATCA
2_UP_Rv_ind66	CAAGCAGAAGACGGCATACGATTTGAAGTCGACCTGCAGCGTACG	TTCAAA
2_UP_Rv_ind67	CAAGCAGAAGACGGCATACGAATGTGTGTCGACCTGCAGCGTACG	ACACAT
2_UP_Rv_ind68	CAAGCAGAAGACGGCATACGAACACATGTCGACCTGCAGCGTACG	ATGTGT
2_UP_Rv_ind69	CAAGCAGAAGACGGCATACGAAGTACTGTCGACCTGCAGCGTACG	AGTACT
2_UP_Rv_ind70	CAAGCAGAAGACGGCATACGAGATATCGTCGACCTGCAGCGTACG	GATATC
2_UP_Rv_ind71	CAAGCAGAAGACGGCATACGAAGTTGAGTCGACCTGCAGCGTACG	TCAACT
2_UP_Rv_ind72	CAAGCAGAAGACGGCATACGAATGGTAGTCGACCTGCAGCGTACG	TACCAT
2_UP_Rv_ind73	CAAGCAGAAGACGGCATACGATAGGATGTCGACCTGCAGCGTACG	ATCCTA
2_UP_Rv_ind74	CAAGCAGAAGACGGCATACGAAACGTTGTCGACCTGCAGCGTACG	AACGTT
2_UP_Rv_ind75	CAAGCAGAAGACGGCATACGAACAACAGTCGACCTGCAGCGTACG	TGTTGT
2_UP_Rv_ind76	CAAGCAGAAGACGGCATACGAAACCAAGTCGACCTGCAGCGTACG	TTGGTT
2_UP_Rv_ind77	CAAGCAGAAGACGGCATACGATTTAGGGTCGACCTGCAGCGTACG	CCTAAA
2_UP_Rv_ind78	CAAGCAGAAGACGGCATACGACCTAAAGTCGACCTGCAGCGTACG	TTTAGG
2_UP_Rv_ind79	CAAGCAGAAGACGGCATACGACTCTCTGTCGACCTGCAGCGTACG	AGAGAG
2_UP_Rv_ind80	CAAGCAGAAGACGGCATACGATGAGACGTCGACCTGCAGCGTACG	GTCTCA
2_UP_Rv_ind81	CAAGCAGAAGACGGCATACGAACAGTGGTCGACCTGCAGCGTACG	CACTGT
2_UP_Rv_ind82	CAAGCAGAAGACGGCATACGAGATGCTGTCGACCTGCAGCGTACG	AGCATC
2_UP_Rv_ind83	CAAGCAGAAGACGGCATACGAATGCACGTCGACCTGCAGCGTACG	GTGCAT
2_UP_Rv_ind84	CAAGCAGAAGACGGCATACGAGATCGAGTCGACCTGCAGCGTACG	TCGATC
2_UP_Rv_ind85	CAAGCAGAAGACGGCATACGAATGACGGTCGACCTGCAGCGTACG	CGTCAT
2_DN_Rv_ind01	CAAGCAGAAGACGGCATACGACGTGATAACGAGCTCGAATTCATCGA	ATCACG
2_DN_Rv_ind02	CAAGCAGAAGACGGCATACGAACATCGAACGAGCTCGAATTCATCGA	CGATGT
2_DN_Rv_ind03	CAAGCAGAAGACGGCATACGAGCCTAAAACGAGCTCGAATTCATCGA	TTAGGC
2_DN_Rv_ind04	CAAGCAGAAGACGGCATACGATGGTCAAACGAGCTCGAATTCATCGA	TGACCA
2_DN_Rv_ind05	CAAGCAGAAGACGGCATACGACACTGTAACGAGCTCGAATTCATCGA	ACAGTG
2_DN_Rv_ind06	CAAGCAGAAGACGGCATACGAATTGGCAACGAGCTCGAATTCATCGA	GCCAAT
2_DN_Rv_ind07	CAAGCAGAAGACGGCATACGAGATCTGAACGAGCTCGAATTCATCGA	CAGATC
2_DN_Rv_ind08	CAAGCAGAAGACGGCATACGATCAAGTAACGAGCTCGAATTCATCGA	ACTTGA
2_DN_Rv_ind09	CAAGCAGAAGACGGCATACGACTGATCAACGAGCTCGAATTCATCGA	GATCAG
2_DN_Rv_ind10	CAAGCAGAAGACGGCATACGAAAGCTAAACGAGCTCGAATTCATCGA	TAGCTT
2_DN_Rv_ind11	CAAGCAGAAGACGGCATACGAGTAGCCAACGAGCTCGAATTCATCGA	GGCTAC
2_DN_Rv_ind12	CAAGCAGAAGACGGCATACGATACAAGAACGAGCTCGAATTCATCGA	CTTGTA
2_DN_Rv_ind13	CAAGCAGAAGACGGCATACGATTGACTAACGAGCTCGAATTCATCGA	AGTCAA
2_DN_Rv_ind14	CAAGCAGAAGACGGCATACGAGGAACTAACGAGCTCGAATTCATCGA	AGTTCC
2_DN_Rv_ind15	CAAGCAGAAGACGGCATACGATGACATAACGAGCTCGAATTCATCGA	ATGTCA
2_DN_Rv_ind16	CAAGCAGAAGACGGCATACGAGGACGGAACGAGCTCGAATTCATCGA	CCGTCC
2_DN_Rv_ind17	CAAGCAGAAGACGGCATACGACTCTACAACGAGCTCGAATTCATCGA	GTAGAG
2_DN_Rv_ind18	CAAGCAGAAGACGGCATACGAGCGGACAACGAGCTCGAATTCATCGA	GTCCGC
2_DN_Rv_ind19	CAAGCAGAAGACGGCATACGATTTCACAACGAGCTCGAATTCATCGA	GTGAAA
2_DN_Rv_ind20	CAAGCAGAAGACGGCATACGAGGCCACAACGAGCTCGAATTCATCGA	GTGGCC
2_DN_Rv_ind21	CAAGCAGAAGACGGCATACGACGAAACAACGAGCTCGAATTCATCGA	GTTTCG
2_DN_Rv_ind22	CAAGCAGAAGACGGCATACGACGTACGAACGAGCTCGAATTCATCGA	CGTACG
2_DN_Rv_ind23	CAAGCAGAAGACGGCATACGACCACTCAACGAGCTCGAATTCATCGA	GAGTGG
2_DN_Rv_ind24	CAAGCAGAAGACGGCATACGAGCTACCAACGAGCTCGAATTCATCGA	GGTAGC
2_DN_Rv_ind25	CAAGCAGAAGACGGCATACGAATCAGTAACGAGCTCGAATTCATCGA	ACTGAT
2_DN_Rv_ind26	CAAGCAGAAGACGGCATACGAGCTCATAACGAGCTCGAATTCATCGA	ATGAGC
2_DN_Rv_ind27	CAAGCAGAAGACGGCATACGAAGGAATAACGAGCTCGAATTCATCGA	ATTCCT
2_DN_Rv_ind28	CAAGCAGAAGACGGCATACGACTTTTGAACGAGCTCGAATTCATCGA	CAAAAG
2_DN_Rv_ind29	CAAGCAGAAGACGGCATACGATAGTTGAACGAGCTCGAATTCATCGA	CAACTA
2_DN_Rv_ind30	CAAGCAGAAGACGGCATACGACCGGTGAACGAGCTCGAATTCATCGA	CACCGG
2_DN_Rv_ind31	CAAGCAGAAGACGGCATACGAATCGTGAACGAGCTCGAATTCATCGA	CACGAT
2_DN_Rv_ind32	CAAGCAGAAGACGGCATACGATGAGTGAACGAGCTCGAATTCATCGA	CACTCA
2_DN_Rv_ind33	CAAGCAGAAGACGGCATACGACGCCTGAACGAGCTCGAATTCATCGA	CAGGCG
2_DN_Rv_ind34	CAAGCAGAAGACGGCATACGAGCCATGAACGAGCTCGAATTCATCGA	CATGGC
2_DN_Rv_ind35	CAAGCAGAAGACGGCATACGAAAAATGAACGAGCTCGAATTCATCGA	CATTTT
2_DN_Rv_ind36	CAAGCAGAAGACGGCATACGATGTTGGAACGAGCTCGAATTCATCGA	CCAACA
2_DN_Rv_ind37	CAAGCAGAAGACGGCATACGAATTCCGAACGAGCTCGAATTCATCGA	CGGAAT
2_DN_Rv_ind38	CAAGCAGAAGACGGCATACGAAGCTAGAACGAGCTCGAATTCATCGA	CTAGCT
2_DN_Rv_ind39	CAAGCAGAAGACGGCATACGAGTATAGAACGAGCTCGAATTCATCGA	CTATAC
2_DN_Rv_ind40	CAAGCAGAAGACGGCATACGATCTGAGAACGAGCTCGAATTCATCGA	CTCAGA
2_DN_Rv_ind41	CAAGCAGAAGACGGCATACGAACAATTAACGAGCTCGAATTCATCGA	AATTGT
2_DN_Rv_ind42	CAAGCAGAAGACGGCATACGAGCTCCAAACGAGCTCGAATTCATCGA	TGGAGC
2_DN_Rv_ind43	CAAGCAGAAGACGGCATACGATCTCCCAACGAGCTCGAATTCATCGA	GGGAGA
2_DN_Rv_ind44	CAAGCAGAAGACGGCATACGAAGTCTCAACGAGCTCGAATTCATCGA	GAGACT
2_DN_Rv_ind45	CAAGCAGAAGACGGCATACGAGGTTCTAACGAGCTCGAATTCATCGA	AGAACC
2_DN_Rv_ind46	CAAGCAGAAGACGGCATACGAACGCCAAACGAGCTCGAATTCATCGA	TGGCGT
2_DN_Rv_ind47	CAAGCAGAAGACGGCATACGACAAATAAACGAGCTCGAATTCATCGA	TATTTG
2_DN_Rv_ind48	CAAGCAGAAGACGGCATACGACGATAGAACGAGCTCGAATTCATCGA	CTATCG
2_DN_Rv_ind49	CAAGCAGAAGACGGCATACGAGTAAGCAACGAGCTCGAATTCATCGA	GCTTAC
2_DN_Rv_ind50	CAAGCAGAAGACGGCATACGACTGCCGAACGAGCTCGAATTCATCGA	CGGCAG
2_DN_Rv_ind51	CAAGCAGAAGACGGCATACGACAGCAAAACGAGCTCGAATTCATCGA	TTGCTG
2_DN_Rv_ind52	CAAGCAGAAGACGGCATACGAGCACTTAACGAGCTCGAATTCATCGA	AAGTGC
2_DN_Rv_ind53	CAAGCAGAAGACGGCATACGATGGTATAACGAGCTCGAATTCATCGA	ATACCA
2_DN_Rv_ind54	CAAGCAGAAGACGGCATACGAAGAGCAAACGAGCTCGAATTCATCGA	TGCTCT
2_DN_Rv_ind55	CAAGCAGAAGACGGCATACGATTTCTAAACGAGCTCGAATTCATCGA	TAGAAA
2_DN_Rv_ind56	CAAGCAGAAGACGGCATACGACGATCTAACGAGCTCGAATTCATCGA	AGATCG
2_DN_Rv_ind59	CAAGCAGAAGACGGCATACGATGCCGAAACGAGCTCGAATTCATCGA	TCGGCA
2_DN_Rv_ind60	CAAGCAGAAGACGGCATACGACTTCGAAACGAGCTCGAATTCATCGA	TCGAAG
2_DN_Rv_ind61	CAAGCAGAAGACGGCATACGATCGGGAAACGAGCTCGAATTCATCGA	TCCCGA
2_DN_Rv_ind62	CAAGCAGAAGACGGCATACGAGAATGAAACGAGCTCGAATTCATCGA	TCATTC
2_DN_Rv_ind63	CAAGCAGAAGACGGCATACGAATTATAAACGAGCTCGAATTCATCGA	TATAAT
2_DN_Rv_ind65	CAAGCAGAAGACGGCATACGATGATTAAACGAGCTCGAATTCATCGA	TAATCA
2_DN_Rv_ind66	CAAGCAGAAGACGGCATACGATTTGAAAACGAGCTCGAATTCATCGA	TTCAAA
2_DN_Rv_ind67	CAAGCAGAAGACGGCATACGAATGTGTAACGAGCTCGAATTCATCGA	ACACAT
2_DN_Rv_ind68	CAAGCAGAAGACGGCATACGAACACATAACGAGCTCGAATTCATCGA	ATGTGT
2_DN_Rv_ind69	CAAGCAGAAGACGGCATACGAAGTACTAACGAGCTCGAATTCATCGA	AGTACT
2_DN_Rv_ind70	CAAGCAGAAGACGGCATACGAGATATCAACGAGCTCGAATTCATCGA	GATATC
2_DN_Rv_ind71	CAAGCAGAAGACGGCATACGAAGTTGAAACGAGCTCGAATTCATCGA	TCAACT
2_DN_Rv_ind72	CAAGCAGAAGACGGCATACGAATGGTAAACGAGCTCGAATTCATCGA	TACCAT
2_DN_Rv_ind73	CAAGCAGAAGACGGCATACGATAGGATAACGAGCTCGAATTCATCGA	ATCCTA
2_DN_Rv_ind74	CAAGCAGAAGACGGCATACGAAACGTTAACGAGCTCGAATTCATCGA	AACGTT
2_DN_Rv_ind75	CAAGCAGAAGACGGCATACGAACAACAAACGAGCTCGAATTCATCGA	TGTTGT
2_DN_Rv_ind76	CAAGCAGAAGACGGCATACGAAACCAAAACGAGCTCGAATTCATCGA	TTGGTT
2_DN_Rv_ind77	CAAGCAGAAGACGGCATACGATTTAGGAACGAGCTCGAATTCATCGA	CCTAAA
2_DN_Rv_ind78	CAAGCAGAAGACGGCATACGACCTAAAAACGAGCTCGAATTCATCGA	TTTAGG
2_DN_Rv_ind79	CAAGCAGAAGACGGCATACGACTCTCTAACGAGCTCGAATTCATCGA	AGAGAG
2_DN_Rv_ind80	CAAGCAGAAGACGGCATACGATGAGACAACGAGCTCGAATTCATCGA	GTCTCA
2_DN_Rv_ind81	CAAGCAGAAGACGGCATACGAACAGTGAACGAGCTCGAATTCATCGA	CACTGT
2_DN_Rv_ind82	CAAGCAGAAGACGGCATACGAGATGCTAACGAGCTCGAATTCATCGA	AGCATC
2_DN_Rv_ind83	CAAGCAGAAGACGGCATACGAATGCACAACGAGCTCGAATTCATCGA	GTGCAT
2_DN_Rv_ind84	CAAGCAGAAGACGGCATACGAGATCGAAACGAGCTCGAATTCATCGA	TCGATC
2_DN_Rv_ind85	CAAGCAGAAGACGGCATACGAATGACGAACGAGCTCGAATTCATCGA	CGTCAT
2B_UP_Rv_ind01	CAAGCAGAAGACGGCATACGAGATCGTGATGTCGACCTGCAGCGTACG	ATCACG
2B_UP_Rv_ind02	CAAGCAGAAGACGGCATACGAGATACATCGGTCGACCTGCAGCGTACG	CGATGT
2B_UP_Rv_ind03	CAAGCAGAAGACGGCATACGAGATGCCTAAGTCGACCTGCAGCGTACG	TTAGGC
2B_UP_Rv_ind04	CAAGCAGAAGACGGCATACGAGATTGGTCAGTCGACCTGCAGCGTACG	TGACCA
2B_UP_Rv_ind05	CAAGCAGAAGACGGCATACGAGATCACTGTGTCGACCTGCAGCGTACG	ACAGTG
2B_UP_Rv_ind06	CAAGCAGAAGACGGCATACGAGATATTGGCGTCGACCTGCAGCGTACG	GCCAAT
2B_UP_Rv_ind07	CAAGCAGAAGACGGCATACGAGATGATCTGGTCGACCTGCAGCGTACG	CAGATC
2B_UP_Rv_ind08	CAAGCAGAAGACGGCATACGAGATTCAAGTGTCGACCTGCAGCGTACG	ACTTGA
2B_UP_Rv_ind09	CAAGCAGAAGACGGCATACGAGATCTGATCGTCGACCTGCAGCGTACG	GATCAG
2B_UP_Rv_ind10	CAAGCAGAAGACGGCATACGAGATAAGCTAGTCGACCTGCAGCGTACG	TAGCTT
2B_UP_Rv_ind11	CAAGCAGAAGACGGCATACGAGATGTAGCCGTCGACCTGCAGCGTACG	GGCTAC
2B_UP_Rv_ind12	CAAGCAGAAGACGGCATACGAGATTACAAGGTCGACCTGCAGCGTACG	CTTGTA
2B_UP_Rv_ind13	CAAGCAGAAGACGGCATACGAGATTTGACTGTCGACCTGCAGCGTACG	AGTCAA
2B_UP_Rv_ind14	CAAGCAGAAGACGGCATACGAGATGGAACTGTCGACCTGCAGCGTACG	AGTTCC
2B_UP_Rv_ind15	CAAGCAGAAGACGGCATACGAGATTGACATGTCGACCTGCAGCGTACG	ATGTCA
2B_UP_Rv_ind16	CAAGCAGAAGACGGCATACGAGATGGACGGGTCGACCTGCAGCGTACG	CCGTCC
2B_UP_Rv_ind17	CAAGCAGAAGACGGCATACGAGATCTCTACGTCGACCTGCAGCGTACG	GTAGAG
2B_UP_Rv_ind18	CAAGCAGAAGACGGCATACGAGATGCGGACGTCGACCTGCAGCGTACG	GTCCGC
2B_UP_Rv_ind19	CAAGCAGAAGACGGCATACGAGATTTTCACGTCGACCTGCAGCGTACG	GTGAAA
2B_UP_Rv_ind20	CAAGCAGAAGACGGCATACGAGATGGCCACGTCGACCTGCAGCGTACG	GTGGCC
2B_UP_Rv_ind21	CAAGCAGAAGACGGCATACGAGATCGAAACGTCGACCTGCAGCGTACG	GTTTCG
2B_UP_Rv_ind22	CAAGCAGAAGACGGCATACGAGATCGTACGGTCGACCTGCAGCGTACG	CGTACG
2B_UP_Rv_ind23	CAAGCAGAAGACGGCATACGAGATCCACTCGTCGACCTGCAGCGTACG	GAGTGG
2B_UP_Rv_ind24	CAAGCAGAAGACGGCATACGAGATGCTACCGTCGACCTGCAGCGTACG	GGTAGC
2B_UP_Rv_ind25	CAAGCAGAAGACGGCATACGAGATATCAGTGTCGACCTGCAGCGTACG	ACTGAT
2B_UP_Rv_ind26	CAAGCAGAAGACGGCATACGAGATGCTCATGTCGACCTGCAGCGTACG	ATGAGC
2B_UP_Rv_ind27	CAAGCAGAAGACGGCATACGAGATAGGAATGTCGACCTGCAGCGTACG	ATTCCT
2B_UP_Rv_ind28	CAAGCAGAAGACGGCATACGAGATCTTTTGGTCGACCTGCAGCGTACG	CAAAAG
2B_UP_Rv_ind29	CAAGCAGAAGACGGCATACGAGATTAGTTGGTCGACCTGCAGCGTACG	CAACTA
2B_UP_Rv_ind30	CAAGCAGAAGACGGCATACGAGATCCGGTGGTCGACCTGCAGCGTACG	CACCGG
2B_UP_Rv_ind31	CAAGCAGAAGACGGCATACGAGATATCGTGGTCGACCTGCAGCGTACG	CACGAT
2B_UP_Rv_ind32	CAAGCAGAAGACGGCATACGAGATTGAGTGGTCGACCTGCAGCGTACG	CACTCA
2B_UP_Rv_ind33	CAAGCAGAAGACGGCATACGAGATCGCCTGGTCGACCTGCAGCGTACG	CAGGCG
2B_UP_Rv_ind34	CAAGCAGAAGACGGCATACGAGATGCCATGGTCGACCTGCAGCGTACG	CATGGC
2B_UP_Rv_ind35	CAAGCAGAAGACGGCATACGAGATAAAATGGTCGACCTGCAGCGTACG	CATTTT
2B_UP_Rv_ind36	CAAGCAGAAGACGGCATACGAGATTGTTGGGTCGACCTGCAGCGTACG	CCAACA
2B_UP_Rv_ind37	CAAGCAGAAGACGGCATACGAGATATTCCGGTCGACCTGCAGCGTACG	CGGAAT
2B_DN_Rv_ind01	CAAGCAGAAGACGGCATACGAGATCGTGATAACGAGCTCGAATTCATCGA	ATCACG
2B_DN_Rv_ind02	CAAGCAGAAGACGGCATACGAGATACATCGAACGAGCTCGAATTCATCGA	CGATGT
2B_DN_Rv_ind03	CAAGCAGAAGACGGCATACGAGATGCCTAAAACGAGCTCGAATTCATCGA	TTAGGC
2B_DN_Rv_ind04	CAAGCAGAAGACGGCATACGAGATTGGTCAAACGAGCTCGAATTCATCGA	TGACCA
2B_DN_Rv_ind05	CAAGCAGAAGACGGCATACGAGATCACTGTAACGAGCTCGAATTCATCGA	ACAGTG
2B_DN_Rv_ind06	CAAGCAGAAGACGGCATACGAGATATTGGCAACGAGCTCGAATTCATCGA	GCCAAT
2B_DN_Rv_ind07	CAAGCAGAAGACGGCATACGAGATGATCTGAACGAGCTCGAATTCATCGA	CAGATC
2B_DN_Rv_ind08	CAAGCAGAAGACGGCATACGAGATTCAAGTAACGAGCTCGAATTCATCGA	ACTTGA
2B_DN_Rv_ind09	CAAGCAGAAGACGGCATACGAGATCTGATCAACGAGCTCGAATTCATCGA	GATCAG
2B_DN_Rv_ind10	CAAGCAGAAGACGGCATACGAGATAAGCTAAACGAGCTCGAATTCATCGA	TAGCTT
2B_DN_Rv_ind11	CAAGCAGAAGACGGCATACGAGATGTAGCCAACGAGCTCGAATTCATCGA	GGCTAC
2B_DN_Rv_ind12	CAAGCAGAAGACGGCATACGAGATTACAAGAACGAGCTCGAATTCATCGA	CTTGTA
2B_DN_Rv_ind13	CAAGCAGAAGACGGCATACGAGATTTGACTAACGAGCTCGAATTCATCGA	AGTCAA
2B_DN_Rv_ind14	CAAGCAGAAGACGGCATACGAGATGGAACTAACGAGCTCGAATTCATCGA	AGTTCC
2B_DN_Rv_ind15	CAAGCAGAAGACGGCATACGAGATTGACATAACGAGCTCGAATTCATCGA	ATGTCA
2B_DN_Rv_ind16	CAAGCAGAAGACGGCATACGAGATGGACGGAACGAGCTCGAATTCATCGA	CCGTCC
2B_DN_Rv_ind17	CAAGCAGAAGACGGCATACGAGATCTCTACAACGAGCTCGAATTCATCGA	GTAGAG
2B_DN_Rv_ind18	CAAGCAGAAGACGGCATACGAGATGCGGACAACGAGCTCGAATTCATCGA	GTCCGC
2B_DN_Rv_ind19	CAAGCAGAAGACGGCATACGAGATTTTCACAACGAGCTCGAATTCATCGA	GTGAAA
2B_DN_Rv_ind20	CAAGCAGAAGACGGCATACGAGATGGCCACAACGAGCTCGAATTCATCGA	GTGGCC
2B_DN_Rv_ind21	CAAGCAGAAGACGGCATACGAGATCGAAACAACGAGCTCGAATTCATCGA	GTTTCG
2B_DN_Rv_ind22	CAAGCAGAAGACGGCATACGAGATCGTACGAACGAGCTCGAATTCATCGA	CGTACG
2B_DN_Rv_ind23	CAAGCAGAAGACGGCATACGAGATCCACTCAACGAGCTCGAATTCATCGA	GAGTGG
2B_DN_Rv_ind24	CAAGCAGAAGACGGCATACGAGATGCTACCAACGAGCTCGAATTCATCGA	GGTAGC
2B_DN_Rv_ind25	CAAGCAGAAGACGGCATACGAGATATCAGTAACGAGCTCGAATTCATCGA	ACTGAT
2B_DN_Rv_ind26	CAAGCAGAAGACGGCATACGAGATGCTCATAACGAGCTCGAATTCATCGA	ATGAGC
2B_DN_Rv_ind27	CAAGCAGAAGACGGCATACGAGATAGGAATAACGAGCTCGAATTCATCGA	ATTCCT
2B_DN_Rv_ind28	CAAGCAGAAGACGGCATACGAGATCTTTTGAACGAGCTCGAATTCATCGA	CAAAAG
2B_DN_Rv_ind29	CAAGCAGAAGACGGCATACGAGATTAGTTGAACGAGCTCGAATTCATCGA	CAACTA
2B_DN_Rv_ind30	CAAGCAGAAGACGGCATACGAGATCCGGTGAACGAGCTCGAATTCATCGA	CACCGG
2B_DN_Rv_ind31	CAAGCAGAAGACGGCATACGAGATATCGTGAACGAGCTCGAATTCATCGA	CACGAT
2B_DN_Rv_ind32	CAAGCAGAAGACGGCATACGAGATTGAGTGAACGAGCTCGAATTCATCGA	CACTCA
2B_DN_Rv_ind33	CAAGCAGAAGACGGCATACGAGATCGCCTGAACGAGCTCGAATTCATCGA	CAGGCG
2B_DN_Rv_ind34	CAAGCAGAAGACGGCATACGAGATGCCATGAACGAGCTCGAATTCATCGA	CATGGC
2B_DN_Rv_ind35	CAAGCAGAAGACGGCATACGAGATAAAATGAACGAGCTCGAATTCATCGA	CATTTT
2B_DN_Rv_ind36	CAAGCAGAAGACGGCATACGAGATTGTTGGAACGAGCTCGAATTCATCGA	CCAACA
2B_DN_Rv_ind37	CAAGCAGAAGACGGCATACGAGATATTCCGAACGAGCTCGAATTCATCGA	CGGAAT
