# Supplementary material for: Direct screening for chromatin status on DNA barcodes in yeast delineates the regulome of H3K79 methylation by Dot1
Source: eLife. 2016 Dec 6;5:e18919. doi: 10.7554/eLife.18919 (PMC5179194; doi:10.7554/eLife.18919)
Supplement: Supplementary file 4. — DOI: http://dx.doi.org/10.7554/eLife.18919.034 [file elife-18919-supp4.xlsx]

## Sheet: Sheet1
Supplemental file 4
Statistical tests performed in this study
	Comparison	Test	N	Effect	multiplicity-adjusted p value	significant?
Figure 2A	UpTag: growth vs methylation	Pearson product-moment correlation coefficient	4245	r=-0.426	2.2e-16	***
Figure 2A	UpTag: slow vs rest	2-sample T test	424 vs 3821	0.46 vs 0.02	2.2e-16	***
Figure 2A	DownTag: growth vs methylation	Pearson product-moment correlation coefficient	4253	r=-0.412	2.2e-16	***
Figure 2A	DownTag: slow vs rest	2-sample T test	425 vs 3828	0.26 vs 0.00	2.2e-16	***
Figure 2C	WT vs rtt109d	Unpaired T test	4 vs 2	0.53 vs 1.27	0.0044	**
Figure 3B	WT vs ado1d - H3K79me1	2-way ANOVA	3 vs 3	1 vs 1.56	0.0048	**
Figure 3B	WT vs ado1d - H3K79me3	2-way ANOVA	3 vs 3	1 vs 0.76	0.4565
Figure 3B	WT vs ado1d - H3K4me3	2-way ANOVA	3 vs 3	1 vs 0.67	0.1557
Figure 3B	WT vs ado1d - H3K36me3	2-way ANOVA	3 vs 3	1 vs 0.64	0.1064
Figure 3B	WT vs ado1d - H2Bub	2-way ANOVA	3 vs 3	1 vs 1.45	0.0276	*
Figure 3D	WT vs ado1d - SAM	Multiple T test	8 vs 7	0.47 vs 37.60	1.10581e-08	***
Figure 3D	WT vs ado1d - SAH	Multiple T test	8 vs 7	0.20 vs 3.81	1.75654e-07	***
Figure 3D	WT vs ado1d - SAM/SAH	Multiple T test	8 vs 7	2.57 vs 9.68	2.51345e-08	***
Figure 4B	me1/H3 - 1 (WT) vs slx8d	1-sample T test	4	1 vs 0.69	0.1096
Figure 4B	me3/H3 - 1 (WT) vs slx8d	1-sample T test	4	1 vs 1.28	0.2595
Figure 4B	me1/H3 - 1 (WT) vs mms21dC	1-sample T test	6	1 vs 0.61	0.0047	**
Figure 4B	me3/H3 - 1 (WT) vs mms21dC	1-sample T test	6	1 vs 1.46	0.0083	**
Figure 4C	me0 - WT vs slx5	2-way ANOVA	4 vs 4	0.16 vs 0.13	0.1442
Figure 4C	me0 - WT vs slx8	2-way ANOVA	4 vs 4	0.16 vs 0.12	0.016	*
Figure 4C	me0 - WT vs mms21dC	2-way ANOVA	4 vs 4	0.16 vs 0.11	0.0018	**
Figure 4C	me1 - WT vs slx5	2-way ANOVA	4 vs 4	0.13 vs 0.13	> 0.9999
Figure 4C	me1 - WT vs slx8	2-way ANOVA	4 vs 4	0.13 vs 0.12	0.863
Figure 4C	me1 - WT vs mms21dC	2-way ANOVA	4 vs 4	0.13 vs 0.11	0.7697
Figure 4C	me2 - WT vs slx5	2-way ANOVA	4 vs 4	0.22 vs 0.29	0.9861
Figure 4C	me2 - WT vs slx8	2-way ANOVA	4 vs 4	0.22 vs 0.22	0.9874
Figure 4C	me2 - WT vs mms21dC	2-way ANOVA	4 vs 4	0.22 vs 0.22	> 0.9999
Figure 4C	me3 - WT vs slx5	2-way ANOVA	4 vs 4	0.49 vs 0.51	0.2747
Figure 4C	me3 - WT vs slx8	2-way ANOVA	4 vs 4	0.49 vs 0.55	0.0008	***
Figure 4C	me3 - WT vs mms21dC	2-way ANOVA	4 vs 4	0.49 vs 0.55	0.0001	***
Figure 5A	WT vs gcn5d - H3K79me0	2-way ANOVA	2 vs 2	11.72 vs 9.56	0.9133
Figure 5A	WT vs gcn5d - H3K79me1	2-way ANOVA	2 vs 2	18.26 vs 13.92	0.4909
Figure 5A	WT vs gcn5d - H3K79me2	2-way ANOVA	2 vs 2	25.73 vs 21.41	0.4939
Figure 5A	WT vs gcn5d - H3K79me3	2-way ANOVA	2 vs 2	44.29 vs 55.12	0.0177	*
Figure 5B	K79me1/H3 - WT vs gcn5d pRS315	2-way ANOVA	10 vs 5	1 vs 0.49	0.3838
Figure 5B	K79me1/H3 - WT vs gcn5d pTW142	2-way ANOVA	10 vs 5	1 vs 0.96	0.9992
Figure 5B	K79me1/H3 - WT vs gcn5d pTW143	2-way ANOVA	10 vs 6	1 vs 0.46	0.2889
Figure 5B	K79me3/H3 - WT vs gcn5d pRS315	2-way ANOVA	10 vs 5	1 vs 4.79	< 0.0001	***
Figure 5B	K79me3/H3 - WT vs gcn5d pTW142	2-way ANOVA	10 vs 5	1 vs 1.12	0.9829
Figure 5B	K79me3/H3 - WT vs gcn5d pTW143	2-way ANOVA	10 vs 6	1 vs 5.32	< 0.0001	***
Figure 5C	H2Bub/H3 - WT vs gcn5d pRS315	2-way ANOVA	10 vs 5	1 vs 1.98	< 0.0001	***
Figure 5C	H2Bub/H3 - WT vs gcn5d pTW142	2-way ANOVA	10 vs 5	1 vs 1.03	0.9979
Figure 5C	H2Bub/H3 - WT vs gcn5d pTW143	2-way ANOVA	10 vs 6	1 vs 1.82	< 0.0001	***
Figure 5C	K4me3/H3 - WT vs gcn5d pRS315	2-way ANOVA	10 vs 5	1 vs 1.42	0.0476	*
Figure 5C	K4me3/H3 - WT vs gcn5d pTW142	2-way ANOVA	10 vs 5	1 vs 0.96	0.9917
Figure 5C	K4me3/H3 - WT vs gcn5d pTW143	2-way ANOVA	10 vs 6	1 vs 1.62	0.0007	***
Figure 5C	K36me3/H3 - WT vs gcn5d pRS315	2-way ANOVA	10 vs 5	1 vs 2.27	< 0.0001	***
Figure 5C	K36me3/H3 - WT vs gcn5d pTW142	2-way ANOVA	10 vs 5	1 vs 1.13	0.817
Figure 5C	K36me3/H3 - WT vs gcn5d pTW143	2-way ANOVA	10 vs 6	1 vs 2.13	< 0.0001	***
Figure 5D	WT vs gcn5d - H2Bub. HO prom	2-way ANOVA	3 vs 3	1 vs 1.862	0.0001	***
Figure 5D	WT vs gcn5d - H3K9ac. HO prom	2-way ANOVA	3 vs 3	1 vs 0.4440	0.0027	**
Figure 5G	1 (WT) vs gcn5d - Bre1	1-sample T test	3	1. vs 0.84	0.0388	*
Figure 5G	1 (WT) vs gcn5d - Rad6	1-sample T test	3	1. vs 0.90	0.85
Figure 5G	1 (WT) vs gcn5d - Lge1	1-sample T test	3	1. vs 1.37	0.3618
Figure 5G	1 (WT) vs gcn5d - Rtf1	1-sample T test	3	1. vs 0.86	0.0598
Figure 5G	1 (WT) vs gcn5d - Ubp8	1-sample T test	3	1. vs 0.57	0.0302	*
Figure 5G	1 (WT) vs gcn5d - Ubp10	1-sample T test	3	1. vs 0.80	0.0751
Figure 3 -figure supplement 1G	1 (WT) vs nat1d - Rad6	1-sample T test	3	1. vs 1.80	0.1863
Figure 3 -figure supplement 1G	2 (WT) vs nat1d - Lge1	1-sample T test	3	1. vs 0.88	0.6741
Figure 3 -figure supplement 1G	2 (WT) vs nat1d - Rtf1	1-sample T test	3	1 vs 1.31	0.0267	*
Figure 3 -figure supplement 1G	3 (WT) vs nat1d - Ubp8	1-sample T test	3	1. vs 1.14	0.2156
Figure 3 -figure supplement 1G	3 (WT) vs nat1d - Ubp10	1-sample T test	3	1. vs 0.77	0.2889
Figure 3 -figure supplement 2A	WT vs ado1d - H3K79me1	2-way ANOVA	3 vs 3	1 vs 1.56	0.0048	**
Figure 3 -figure supplement 2A	WT vs ado1d - H3K79me3	2-way ANOVA	3 vs 3	1 vs 0.76	0.4565
Figure 3 -figure supplement 2A	WT vs ado1d - H3K4me3	2-way ANOVA	3 vs 3	1 vs 0.67	0.1557
Figure 3 -figure supplement 2A	WT vs ado1d - H3K36me3	2-way ANOVA	3 vs 3	1 vs 0.64	0.1064
Figure 3 -figure supplement 2A	WT vs ado1d - H2Bub	2-way ANOVA	3 vs 3	1 vs 1.45	0.0276	*
Figure 3 -figure supplement 2B	WT vs ado1d - H3K79me1	2-way ANOVA	3 vs 3	1 vs 1.92	0.0048	**
Figure 3 -figure supplement 2B	WT vs ado1d - H3K79me3	2-way ANOVA	3 vs 3	1 vs 0.58	0.4565
Figure 3 -figure supplement 2B	WT vs ado1d - H3K4me3	2-way ANOVA	3 vs 3	1 vs 0.71	0.1557
Figure 3 -figure supplement 2B	WT vs ado1d - H3K36me3	2-way ANOVA	3 vs 3	1 vs 0.81	0.1064
Figure 3 -figure supplement 2B	WT vs ado1d - H2Bub	2-way ANOVA	3 vs 3	1 vs 2.01	0.0267	*
Figure 4 -figure supplement 1B	WT vs slx5 - H2Bub	1-way ANOVA	6 vs 9	1. vs 1.08	0.8566
Figure 4 -figure supplement 1B	WT vs slx8 - H2Bub	1-way ANOVA	6 vs 9	1. vs 0.98	0.9978
Figure 4 -figure supplement 1B	WT vs mms21dC - H2Bub	1-way ANOVA	6 vs 3	1. vs 0.94	0.9781
Figure 4 -figure supplement 1B	ubp8d - H2Bub	1-way ANOVA	6 vs 3	1. vs 1.32	0.0408	*
Figure 5 -figure supplement 1C	me1/H3 - WT vs gcn5d pRS315	2-way ANOVA	5 vs 3	1 vs 0.51	0.0092	**
Figure 5 -figure supplement 1C	me1/H3 - WT vs gcn5d pTW142	2-way ANOVA	5 vs 3	1 vs 0.90	0.8845
Figure 5 -figure supplement 1C	me1/H3 - WT vs gcn5d pTW143	2-way ANOVA	5 vs 3	1 vs 0.45	0.0035	**
Figure 5 -figure supplement 1C	me3/H3 - WT vs gcn5d pRS315	2-way ANOVA	5 vs 3	1 vs 2.53	< 0.0001	***
Figure 5 -figure supplement 1C	me3/H3 - WT vs gcn5d pTW142	2-way ANOVA	5 vs 3	1 vs 1.00	> 0.9999
Figure 5 -figure supplement 1C	me3/H3 - WT vs gcn5d pTW143	2-way ANOVA	5 vs 3	1 vs 2.66	< 0.0001	***
Figure 5 -figure supplement 2C	1 (WT) vs gcn5d panel A	1-sample T test	3	1. vs 2.50	0.0557
Figure 5 -figure supplement 2C	1 (WT) vs gcn5d panel B	1-sample T test	3	1 vs 3.75	0.137
Figure 5 -figure supplement 2C	1 (WT) vs ada2d	1-sample T test	3	1. vs 2.80	0.087
Figure 5 -figure supplement 2E	WT vs nat1d - Ubp8-TAP	2-way ANOVA	3 vs 3	1. vs 0.47	0.0129	*
Figure 5 -figure supplement 2E	WT vs gcn5d - Ubp8-TAP	2-way ANOVA	3 vs 3	1. vs 1.27	0.1912
Figures 5 - figure supplement 3	WT vs gcn5d - H2Bub. ACT1 prom	2-way ANOVA	3 vs 3	1 vs 1.41	0.096
Figures 5 - figure supplement 3	WT vs gcn5d - H3K9ac. ACT1 prom	2-way ANOVA	3 vs 3	1 vs 0.32	0.0105	*
Figures 5 - figure supplement 3	WT vs gcn5d - H2Bub. ACT1 ORF	2-way ANOVA	3 vs 3	1 vs 1.43	0.0347	*
Figures 5 - figure supplement 3	WT vs gcn5d - H3K9ac. ACT1 ORF	2-way ANOVA	3 vs 3	1 vs 0.55	0.0294	*
Figures 5 - figure supplement 3	WT vs gcn5d - H2Bub. ADH1 prom	2-way ANOVA	3 vs 3	1 vs 1.17	0.4478
Figures 5 - figure supplement 3	WT vs gcn5d - H3K9ac. ADH1 prom	2-way ANOVA	3 vs 3	1 vs 0.30	0.0023	**
Figures 5 - figure supplement 3	WT vs gcn5d - H2Bub. ADH1 ORF	2-way ANOVA	3 vs 3	1 vs 1.38	0.0162	*
Figures 5 - figure supplement 3	WT vs gcn5d - H3K9ac. ADH1 ORF	2-way ANOVA	3 vs 3	1 vs 0.57	0.0086	**
Figures 5 - figure supplement 3	WT vs gcn5d - H2Bub. PMA1 prom	2-way ANOVA	3 vs 3	1 vs 1.07	0.8172
Figures 5 - figure supplement 3	WT vs gcn5d - H3K9ac. PMA1 prom	2-way ANOVA	3 vs 3	1 vs 0.55	0.0087	**
Figures 5 - figure supplement 3	WT vs gcn5d - H2Bub. PMA1 ORF	2-way ANOVA	3 vs 3	1 vs 1.16	0.388
Figures 5 - figure supplement 3	WT vs gcn5d - H3K9ac. PMA1ORF	2-way ANOVA	3 vs 3	1 vs 1.11	0.6155
