# Supplementary material for: Direct screening for chromatin status on DNA barcodes in yeast delineates the regulome of H3K79 methylation by Dot1
Source: eLife. 2016 Dec 6;5:e18919. doi: 10.7554/eLife.18919 (PMC5179194; doi:10.7554/eLife.18919)
Supplement: Table 1—source data 1. — DOI: http://dx.doi.org/10.7554/eLife.18919.017 [file elife-18919-table1-data1.xlsx]

## Sheet: Readme
Table 1 - source data 1
Belonging to Table 1
Groups as defined by the CLIK tool and complexes enriched in each group
4 sheets have info on each of the four groups of candidate regulators
2 sheets have info on the datasets considered
See also Table 1 - figure supplement 1 for visualization of the CLIK groups

## Sheet: UpTag_lowK79me
Group 3
Members in CLIK group (X and Y axis):
RAD6, RTF1, LGE1, BRE1, NAT1, ARD1, ADO1, RPS23A, MTG2, YJU3, REF2, AVL9, RPS19A, VMA5, BUD21, RPL8A, KCS1, RCO1, TIF4632, SLH1, AEP1, JJJ3, BRO1, FYV7, YOR238W, VPS54, RPL23A, FSH1, DCV1, RPL20B, SWC3, DAL3, NHX1, SLX9, TMA19, YML096W, IRC18, PML1, ALT1, RPL40B, YML018C, VPS8, RPN4
*All members within CLIK group (including duplicates, if present), are used for the following stats. All interactions are considered to be reciprocal. If the X and Y dimensions are not symmetrical then all unique members in the X dimension are compared to all members in the Y dimension, and conversely (i.e. the X and Y dimensions are not compared to themselves).
# of members without connections = 20
# of interactions within group = 79
Mean # of interactions per member of the group = 1.881
Mean Clustering Coefficient = 0.167
Mean Clustering Coefficient (including nodes w/ degree < 2) = 0.089
CLIK Group Score = 45.150
All the members of the following complexes are in this CLIK group (excluding genes not present in dataset) and this was unlikely due to chance (i.e. p-value < 0.05)
Lge1p/Bre1p complex -- P-Value = 1.19e-04
2 member(s) in this CLIK group:
YDL074C, YPL055C
Based on the enrichment of complex members within this CLIK group, the following genes may be bootstrapped [complex name - (# in CLIK group OF # members in complex)]
cytoplasmic ribosomal large subunit -- P-Value = 0.002
4 of 50 in CLIK group:
YOR312C, YHL033C, YBL087C, YKR094C
46 members not in CLIK group:
YML073C, YDR471W, YHL001W, YMR121C, YIL052C, YLR061W, YOR234C, YPR102C, YGL135W, YGL031C, YIL148W, YDR418W, YKL006W, YDL130W, YPL198W, YGR148C, YJL177W, YLR185W, YLR448W, YGR085C, YEL054C, YJL189W, YMR242C, YDL082W, YNL301C, YLR325C, YLR406C, YMR194W, YDL136W, YPL079W, YER117W, YLR344W, YBR031W, YPL220W, YIL133C, YDR382W, YHR141C, YBR191W, YLL045C, YDL184C, YIL018W, YDR012W, YNL069C, YNL067W, YOL…
31 members not in dataset:
YOL127W, YER056C-A, YFR032C-A, YPL143W, YGL147C, YHR010W, YMR142C, YJR094W-A, YLR340W, YPL249C-A, YBR084C-A, YLR029C, YGL030W, YGL076C, YOL120C, YBL027W, YDL075W, YFL034C-A, YBL092W, YDL133C-A, YGL103W, YPR043W, YKL180W, YOR063W, YPL131W, YNL162W, YGR034W, YDL081C, YLR075W, YDL191W, YFR031C-A
CORVET complex -- P-Value = 0.033
1 of 3 in CLIK group:
YAL002W
2 members not in CLIK group:
YDR495C, YPL045W
3 members not in dataset:
YLR148W, YMR231W, YLR396C
RES complex -- P-Value = 0.033
1 of 3 in CLIK group:
YLR016C
2 members not in CLIK group:
YIR005W, YGL174W
Rpd3S complex -- P-Value = 0.033
1 of 3 in CLIK group:
YMR075W
2 members not in CLIK group:
YPL139C, YPR023C
2 members not in dataset:
YNL330C, YOL004W
eukaryotic translation initiation factor 4F complex -- P-Value = 0.033
1 of 3 in CLIK group:
YGL049C
2 members not in CLIK group:
YKR059W, YJL138C
2 members not in dataset:
YOL139C, YGR162W
proteasome regulatory particle -- P-Value = 0.033
1 of 3 in CLIK group:
YDL020C
2 members not in CLIK group:
YFR010W, YGR232W
1 members not in dataset:
YER012W
Cdc73p/Paf1p complex -- P-Value = 0.043
1 of 4 in CLIK group:
YGL244W
3 members not in CLIK group:
YOL145C, YAL021C, YOR123C
3 members not in dataset:
YLR418C, YBR279W, YDR138W
GARP complex -- P-Value = 0.043
1 of 4 in CLIK group:
YDR027C
3 members not in CLIK group:
YJL029C, YKR020W, YDR484W
Swr1p complex -- P-Value = 0.043
1 of 4 in CLIK group:
YAL011W
3 members not in CLIK group:
YDR334W, YLR085C, YDR485C
9 members not in dataset:
YBR231C, YNL107W, YDR190C, YLR385C, YJL081C, YFL039C, YGR002C, YPL235W, YML041C
dipthamide complex -- P-Value = 0.043
1 of 4 in CLIK group:
YJR097W
3 members not in CLIK group:
YIL103W, YLR172C, YKL191W

## Sheet: UpTag_highK79me
Group 2
CLIK group size 215 x 199
# of members in CLIK group: 215 (no duplicates found)
Members only in X range (3678-3693):
TAF14, RPS22B, ATG7, SSE1, PCL10, HOM6, QDR2, BCS1, JSN1, SSE2, RAM1, YBR071W, OSM1, TOM7, YDR262W, ARF3
Members in X and Y range (3694-3892):
BUD27, REI1, YNL018C, YPL107W, EGH1, YGR122W, GTB1, PAN2, DTR1, PDB1, PAU24, CLB5, RAD26, ISA2, IWR1, ATP3, CAF16, FRE5, PGD1, CUL3, VMA22, YKU70, YLR345W, SHU2, ROD1, MNN10, RLF2, PIH1, YOL163W, AAD10, ANT1, GAP1, TPS3, RAX1, MRN1, PPM1, MIG1, CCR4, XRS2, LSM6, RMD1, NUP84, MGM1, RAD52, CUS2, NTA1, CTF4, TPO4, RAD55, VPS38, SAC6, MMS1, RPS21A, SYG1, PRY3, MIS1, YLL066C, MDM12, YAT1, VAC7, MDM31,…
*All members within CLIK group (including duplicates, if present), are used for the following stats. All interactions are considered to be reciprocal. If the X and Y dimensions are not symmetrical then all unique members in the X dimension are compared to all members in the Y dimension, and conversely (i.e. the X and Y dimensions are not compared to themselves).
# of members without connections = 75
# of interactions within group = 1074
Mean # of interactions per member of the group = 5.019
Mean Clustering Coefficient = 0.131
Mean Clustering Coefficient (including nodes w/ degree < 2) = 0.085
CLIK Group Score = 199.941
All the members of the following complexes are in this CLIK group (excluding genes not present in dataset) and this was unlikely due to chance (i.e. p-value < 0.05)
Slx5p/Slx8p complex -- P-Value = 0.003
2 member(s) in this CLIK group:
YER116C, YDL013W
rad51-rad57 -- P-Value = 4.92e-07
5 member(s) in this CLIK group:
YDR004W, YGL163C, YDR076W, YML032C, YER095W
mms22-rtt101-mms1 -- P-Value = 0.003
2 member(s) in this CLIK group:
YLR320W, YPR164W
1 members not in dataset:
YJL047C
ER V-ATPase assembly complex -- P-Value = 0.003
2 member(s) in this CLIK group:
YHR060W, YKL119C
Mdm12p/Mmm1p/Mdm10p complex -- P-Value = 0.003
2 member(s) in this CLIK group:
YLL006W, YOL009C
1 members not in dataset:
YAL010C
Based on the enrichment of complex members within this CLIK group, the following genes may be bootstrapped [complex name - (# in CLIK group OF # members in complex)]
"DNA-directed RNA polymerase II, holoenzyme" -- P-Value = 0.005
3 of 7 in CLIK group:
YDR448W, YDL115C, YDR176W
4 members not in CLIK group:
YGL151W, YLR055C, YDR392W, YNL025C
8 members not in dataset:
YGR097W, YML010W, YGR252W, YOL148C, YPL254W, YPL042C, YBR081C, YBR236C
SWI/SNF complex -- P-Value = 0.005
3 of 7 in CLIK group:
YBR289W, YHL025W, YPL129W
4 members not in CLIK group:
YGR275W, YNR023W, YFL049W, YDR073W
5 members not in dataset:
YPR034W, YJL176C, YMR033W, YPL016W, YOR290C
SLIK (SAGA-like) complex -- P-Value = 0.011
3 of 9 in CLIK group:
YDR448W, YDR176W, YMR223W
6 members not in CLIK group:
YGL066W, YER164W, YLR055C, YGL252C, YDR392W, YHR099W
10 members not in dataset:
YBR198C, YGR252W, YGR274C, YDR145W, YPL254W, YGL112C, YMR236W, YOL148C, YBR081C, YDR167W
"alpha,alpha-trehalose-phosphate synthase complex (UDP-forming)" -- P-Value = 0.017
2 of 4 in CLIK group:
YMR261C, YBR126C
2 members not in CLIK group:
YML100W, YDR074W
Ada2/Gcn5/Ada3 transcription activator complex -- P-Value = 0.017
2 of 4 in CLIK group:
YDR448W, YDR176W
2 members not in CLIK group:
YOR023C, YDR392W
6 members not in dataset:
YBR198C, YGR252W, YOL148C, YPL254W, YBR081C, YDR167W
F0/F1 ATP synthase (complex V) -- P-Value = 0.020
3 of 11 in CLIK group:
YLR295C, YJR121W, YBR039W
8 members not in CLIK group:
YBL099W, YKL016C, YPR020W, YPL078C, YDR298C, YPL271W, YDR377W, YDL181W
7 members not in dataset:
Q0080, YDL004W, YOL077W-A, Q0130, Q0085, YDR322C-A, YML081C-A
SAGA complex -- P-Value = 9.16e-04
4 of 9 in CLIK group:
YDR448W, YDR176W, YMR223W, YPL047W
5 members not in CLIK group:
YGL066W, YER164W, YLR055C, YDR392W, YHR099W
13 members not in dataset:
YCL010C, YBR198C, YGR252W, YGR274C, YDR145W, YMR227C, YPL254W, YGL112C, YMR236W, YOL148C, YBR081C, YBR111W-A, YDR167W

## Sheet: DownTag_lowK79me
Group 6
CLIK group size 50 x 57
# of members in CLIK group: 57 (no duplicates found)
Members only in Y range (51-57):
POA1, AIM36, BSC4, CBP6, YBL028C, IKI1, SNF8
Members in X and Y range (1-50):
BRE1, LGE1, NAT1, RAD6, RTF1, ADO1, EFM6, RPP1B, MRP8, DIT2, ARD1, YLR042C, UBP6, MET10, GCN20, YPR202W, SSM4, VMA5, MTF2, YHR078W, REF2, MEF2, UMP1, RPN4, SAS5, FUS3, BUR2, RPA34, FYV7, CAM1, YPL113C, MSM1, DSE2, HSP104, INP2, DAL7, DOA1, HO, VMA6, UBA4, URA7, PDA1, RPL40B, RPL23A, BRO1, LDB7, SAS2, ASP3-4, FPR1, YKR018C
*All members within CLIK group (including duplicates, if present), are used for the following stats. All interactions are considered to be reciprocal. If the X and Y dimensions are not symmetrical then all unique members in the X dimension are compared to all members in the Y dimension, and conversely (i.e. the X and Y dimensions are not compared to themselves).
# of members without connections = 30
# of interactions within group = 130
Mean # of interactions per member of the group = 2.653
Mean Clustering Coefficient = 0.165
Mean Clustering Coefficient (including nodes w/ degree < 2) = 0.078
CLIK Group Score = 59.444
All the members of the following complexes are in this CLIK group (excluding genes not present in dataset) and this was unlikely due to chance (i.e. p-value < 0.05)
Sgv1p/Bur2p complex -- P-Value = 0.015
1 member(s) in this CLIK group:
YLR226W
1 members not in dataset:
YPR161C
STE5-MAPK complex -- P-Value = 0.015
1 member(s) in this CLIK group:
YBL016W
3 members not in dataset:
YDR103W, YDL159W, YLR362W
Lge1p/Bre1p complex -- P-Value = 2.10e-04
2 member(s) in this CLIK group:
YDL074C, YPL055C
Based on the enrichment of complex members within this CLIK group, the following genes may be bootstrapped [complex name - (# in CLIK group OF # members in complex)]
"H+-transporting ATPase, Golgi" -- P-Value = 0.009
2 of 10 in CLIK group:
YKL080W, YLR447C
8 members not in CLIK group:
YGR020C, YMR054W, YPL234C, YPR036W, YEL027W, YEL051W, YOR332W, YDL185W
3 members not in dataset:
YHR039C-A, YHR026W, YBR127C
"H+-transporting ATPase, vacuolar" -- P-Value = 0.009
2 of 10 in CLIK group:
YKL080W, YLR447C
8 members not in CLIK group:
YGR020C, YPL234C, YPR036W, YEL027W, YEL051W, YOR332W, YOR270C, YDL185W
3 members not in dataset:
YHR039C-A, YHR026W, YBR127C
proteasome complex -- P-Value = 0.009
2 of 10 in CLIK group:
YFR010W, YGL058W
8 members not in CLIK group:
YBR082C, YEL037C, YHR052W, YGL141W, YDR059C, YHL030W, YDR069C, YGR184C
3 members not in dataset:
YDR177W, YFL007W, YHR200W
cytoplasmic ribosomal large subunit -- P-Value = 0.036
3 of 50 in CLIK group:
YDL130W, YBL087C, YKR094C
47 members not in CLIK group:
YML073C, YDR471W, YHL001W, YMR121C, YIL052C, YLR061W, YOR234C, YPR102C, YGL135W, YOR312C, YGL031C, YIL148W, YDR418W, YKL006W, YPL198W, YGR148C, YJL177W, YLR185W, YLR448W, YGR085C, YEL054C, YJL189W, YMR242C, YDL082W, YNL301C, YLR325C, YLR406C, YMR194W, YDL136W, YPL079W, YER117W, YLR344W, YBR031W, YPL220W, YIL133C, YDR382W, YHR141C, YBR191W, YHL033C, YLL045C, YDL184C, YIL018W, YDR012W, YNL069C, YNL…
31 members not in dataset:
YOL127W, YER056C-A, YFR032C-A, YPL143W, YGL147C, YHR010W, YMR142C, YJR094W-A, YLR340W, YPL249C-A, YBR084C-A, YLR029C, YGL030W, YGL076C, YOL120C, YBL027W, YDL075W, YFL034C-A, YBL092W, YDL133C-A, YGL103W, YPR043W, YKL180W, YOR063W, YPL131W, YNL162W, YGR034W, YDL081C, YLR075W, YDL191W, YFR031C-A
ESCRT-II -- P-Value = 0.043
1 of 3 in CLIK group:
YPL002C
2 members not in CLIK group:
YLR417W, YJR102C
RSC complex -- P-Value = 0.043
1 of 3 in CLIK group:
YBL006C
2 members not in CLIK group:
YGR056W, YGR275W
14 members not in dataset:
YDR303C, YCR020W-B, YHR056C, YCR052W, YLR321C, YKR008W, YPR034W, YMR091C, YIL126W, YLR033W, YMR033W, YLR357W, YFR037C, YML127W

## Sheet: DownTag_highK79me
Group 5
CLIK group size 204 x 255
# of members in CLIK group: 256 (no duplicates found)
Members only in X range (3895-3895):
PHO90
Members only in Y range (3640-3691):
PMP3, CDA2, RRI2, MRPL17, YOR292C, RGM1, ATG20, AIM29, KIP2, QCR2, PRD1, DSC2, BOP3, RRI1, FEX2, RPL1B, YPR114W, YOR1, GAL11, YEN1, SET3, CWC21, YPL275W, END3, NSG2, OMS1, YMR018W, RPL16B, MRC1, ARO10, PCA1, HSP33, IMH1, FRE4, YPR063C, YJR115W, FDC1, RGA2, CHS7, SHE4, TMN3, NGG1, YPL216W, YDL183C, DFM1, PIH1, DOG2, RPS14A, TDA2, FAR3, PET112, ARO80
Members in X and Y range (3692-3894):
BIT61, TCM62, SGM1, SRT1, RPS6A, UBR2, RXT3, CLB4, OYE3, ERG28, TPO3, NUP60, UBP5, YMR279C, YGR149W, YKR041W, YPR027C, MDM12, YGL082W, YAT1, RAV1, YOR268C, SNF6, VHS2, SOV1, RRD1, ENA1, MRP17, CSM1, CTF18, VPS55, PDR11, AGE1, FUS2, SGF11, TRS65, TPO1, DBF2, DOT1, SET2, SUR7, CAX4, YPR109W, MRPL51, HOM6, CCH1, SGF73, LRG1, DBP7, RSM18, WSC2, PMT1, HEM14, LEA1, MRE11, YLL056C, CHO2, SEC28, IRC21, T…
*All members within CLIK group (including duplicates, if present), are used for the following stats. All interactions are considered to be reciprocal. If the X and Y dimensions are not symmetrical then all unique members in the X dimension are compared to all members in the Y dimension, and conversely (i.e. the X and Y dimensions are not compared to themselves).
# of members without connections = 95
# of interactions within group = 1819
Mean # of interactions per member of the group = 8.961
Mean Clustering Coefficient = 0.185
Mean Clustering Coefficient (including nodes w/ degree < 2) = 0.116
CLIK Group Score = 282.695
All the members of the following complexes are in this CLIK group (excluding genes not present in dataset) and this was unlikely due to chance (i.e. p-value < 0.05)
Slx5p/Slx8p complex -- P-Value = 0.004
2 member(s) in this CLIK group:
YER116C, YDL013W
"actin cytoskeleton-regulatory complex, Pan1p/Sla1p/End3p complex" -- P-Value = 0.004
2 member(s) in this CLIK group:
YNL084C, YBL007C
1 members not in dataset:
YIR006C
mms22-rtt101-mms1 -- P-Value = 0.004
2 member(s) in this CLIK group:
YLR320W, YPR164W
1 members not in dataset:
YJL047C
Bub1p/Bub3p complex -- P-Value = 0.004
2 member(s) in this CLIK group:
YOR026W, YGR188C
Based on the enrichment of complex members within this CLIK group, the following genes may be bootstrapped [complex name - (# in CLIK group OF # members in complex)]
kinetochore -- P-Value = 0.008
3 of 7 in CLIK group:
YOR073W, YGR063C, YJR060W
4 members not in CLIK group:
YCL029C, YLR315W, YFR046C, YDR383C
11 members not in dataset:
YPL233W, YIR010W, YDR328C, YLR045C, YJR112W, YDR356W, YKL049C, YBR211C, YDR320C-A, YKL138C-A, YBR233W-A
SAGA complex -- P-Value = 0.018
3 of 9 in CLIK group:
YGL066W, YDR176W, YPL047W
6 members not in CLIK group:
YDR448W, YER164W, YMR223W, YLR055C, YDR392W, YHR099W
13 members not in dataset:
YCL010C, YBR198C, YGR252W, YGR274C, YDR145W, YMR227C, YPL254W, YGL112C, YMR236W, YOL148C, YBR081C, YBR111W-A, YDR167W
nuclear pore -- P-Value = 0.021
5 of 25 in CLIK group:
YDR159W, YDL116W, YJL030W, YKR082W, YAR002W
20 members not in CLIK group:
YKL057C, YLR018C, YPL125W, YML103C, YML107C, YDR192C, YMR273C, YLR335W, YMR129W, YGL016W, YBL079W, YER107C, YER105C, YDL088C, YHR015W, YGL086W, YOR112W, YGL100W, YDR424C, YMR153W
27 members not in dataset:
YOR257W, YOL072W, YIL115C, YLR347C, YGR119C, YPL169C, YGL092W, YGL172W, YLR208W, YJL041W, YBR111W-A, YER110C, YJL039C, YKL186C, YOR098C, YKL068W, YJL061W, YPL020C, YNL189W, YJR042W, YIL063C, YDL207W, YMR255W, YFR002W, YML031W, YMR047C, YOR046C
"alpha,alpha-trehalose-phosphate synthase complex (UDP-forming)" -- P-Value = 0.024
2 of 4 in CLIK group:
YDR074W, YBR126C
2 members not in CLIK group:
YML100W, YMR261C
cAMP-dependent protein kinase -- P-Value = 0.024
2 of 4 in CLIK group:
YIL033C, YPL203W
2 members not in CLIK group:
YJL164C, YKL166C
transcription factor TFIID complex -- P-Value = 0.024
2 of 4 in CLIK group:
YDR176W, YPL129W
2 members not in CLIK group:
YDR448W, YDR392W
17 members not in dataset:
YBR198C, YML098W, YPL011C, YGR252W, YGR274C, YDR145W, YCR042C, YMR227C, YMR005W, YGL112C, YML114C, YMR236W, YML015C, YER148W, YOL148C, YBR081C, YDR167W
signalosome complex -- P-Value = 0.038
2 of 5 in CLIK group:
YOL117W, YDL216C
3 members not in CLIK group:
YMR025W, YDR179C, YJR084W
1 members not in dataset:
YIL071C
cytoskeleton assembly pathway -- P-Value = 0.040
3 of 12 in CLIK group:
YDR379W, YPL161C, YER155C
9 members not in CLIK group:
YGR221C, YBR200W, YHR061C, YPL115C, YGR014W, YDR309C, YDL135C, YFL047W, YOL113W
4 members not in dataset:
YOR127W, YLR229C, YAL041W, YNL298W
Rpd3L complex -- P-Value = 1.19e-04
5 of 9 in CLIK group:
YDL076C, YAL013W, YIL084C, YBR095C, YMR263W
4 members not in CLIK group:
YKL185W, YPL139C, YPL181W, YDR207C
3 members not in dataset:
YNL330C, YNL097C, YOL004W
mediator complex -- P-Value = 1.28e-05
6 of 10 in CLIK group:
YNR010W, YOL051W, YHR041C, YPL129W, YDL005C, YGL127C
4 members not in CLIK group:
YDR443C, YNL236W, YGL151W, YPR070W
14 members not in dataset:
YMR112C, YLR071C, YHR058C, YDL140C, YOR174W, YBL093C, YGL025C, YPR168W, YDR308C, YOL135C, YBR193C, YGR104C, YER022W, YBR253W
Kornberg's mediator (SRB) complex -- P-Value = 2.66e-05
6 of 11 in CLIK group:
YNR010W, YNL025C, YOL051W, YHR041C, YDL005C, YGL127C
5 members not in CLIK group:
YDR443C, YNL236W, YGL151W, YPR070W, YCR081W
14 members not in dataset:
YMR112C, YLR071C, YHR058C, YPL042C, YOR174W, YBL093C, YGL025C, YPR168W, YDR308C, YOL135C, YBR193C, YGR104C, YER022W, YBR253W

## Sheet: CLIK info UpTag
Noise reduction accomplished -- 44 identifiers (genes) removed from rank list [rank(s) in dataset is in parenthesis]:
YGL020C (87), YNL197C (189), YMR272C (482), YJR073C (646), YLR418C (652), YLR233C (721), YLR039C (794), YEL036C (894), YNL209W (923), YOL012C (1018), YER083C (1055), YDL156W (1262), YJL095W (1269), YER151C (1276), YCR077C (1398), YNL307C (1464), YHR030C (1657), YNL298W (1707), YDL077C (1847), YDR477W (2018), YPL240C (2065), YBL032W (2372), YDR432W (2510), YMR186W (2522), YLL039C (2693), YER016W (…
Number of genes considered: 3892
Number of interactions: 103504
Number of bins = 7921
Number of bins containing data (interactions): 7918
Organization bin width (obw): 43.73
Point density area [(obw*2)^2]: 7649.37
95th percentile value = 0.01046 (any bin with a density > than this value is considered significant.)
GROUP #1
Mean Density = 0.024
Max Density = 0.028
X Range = 1 - 45 | Y range = 3731 - 3892
GROUP #2
Mean Density = 0.027
Max Density = 0.041
X Range = 3678 - 3892 | Y range = 3694 - 3892
GROUP #3
Mean Density = 0.023
Max Density = 0.023
X Range = 1 - 43 | Y range = 1 - 43
GROUP #4
Mean Density = 0.024
Max Density = 0.026
X Range = 3745 - 3888 | Y range = 1 - 44

## Sheet: CLIK info DownTag
Noise reduction accomplished -- 45 identifiers (genes) removed from rank list [rank(s) in dataset is in parenthesis]:
YMR186W (37), YLR418C (76), YDR432W (83), YER151C (109), YGL020C (146), YLL039C (166), YNL209W (253), YOL081W (316), YNL307C (642), YDL077C (665), YGR252W (754), YLL013C (894), YHL034C (1067), YNL255C (1126), YER016W (1158), YHR030C (1167), YBL032W (1237), YHR200W (1736), YGR105W (1790), YEL036C (1881), YER083C (1997), YNL298W (2266), YNR051C (2339), YMR272C (2397), YNL197C (2571), YMR080C (2772)…
Number of genes considered: 3895
Number of interactions: 103474
Number of bins = 9409
Number of bins containing data (interactions): 9398
Organization bin width (obw): 40.15
Point density area [(obw*2)^2]: 6449.58
95th percentile value = 0.01054 (any bin with a density > than this value is considered significant.)
GROUP #1
Mean Density = 0.037
Max Density = 0.053
X Range = 3748 - 3895 | Y range = 1 - 63
GROUP #2
Mean Density = 0.027
Max Density = 0.028
X Range = 3470 - 3510 | Y range = 3834 - 3892
GROUP #3
Mean Density = 0.027
Max Density = 0.030
X Range = 3588 - 3648 | Y range = 3825 - 3878
GROUP #4
Mean Density = 0.039
Max Density = 0.050
X Range = 1 - 79 | Y range = 3720 - 3895
GROUP #5
Mean Density = 0.044
Max Density = 0.071
X Range = 3692 - 3895 | Y range = 3640 - 3894
GROUP #6
Mean Density = 0.033
Max Density = 0.034
X Range = 1 - 50 | Y range = 1 - 57
